# Supplementary material
Source: PubMed Central journal article supplement (PMC3494150)

## Supplemental Information

# Phosphoproteome dynamics upon changes in plant water status reveal early events associated with rapid growth adjustment in maize leaves

Ludovic Bonhomme, Benoît Valot, François Tardieu and Michel Zivy

## Annotated spectra

pS: phosphoserine

pT: phosphothreonine

pY: phosphotyrosine

p(XXX): localization of the phosphorylation site was ambiguous.

Peptide: SNpSVSTTGNENLR

Protein: tr|B8A307|B8A307\_MAIZE; S241

e-value: 7.7E-8

S·N·S·V·S·T·T·G·N·E·N·L·R

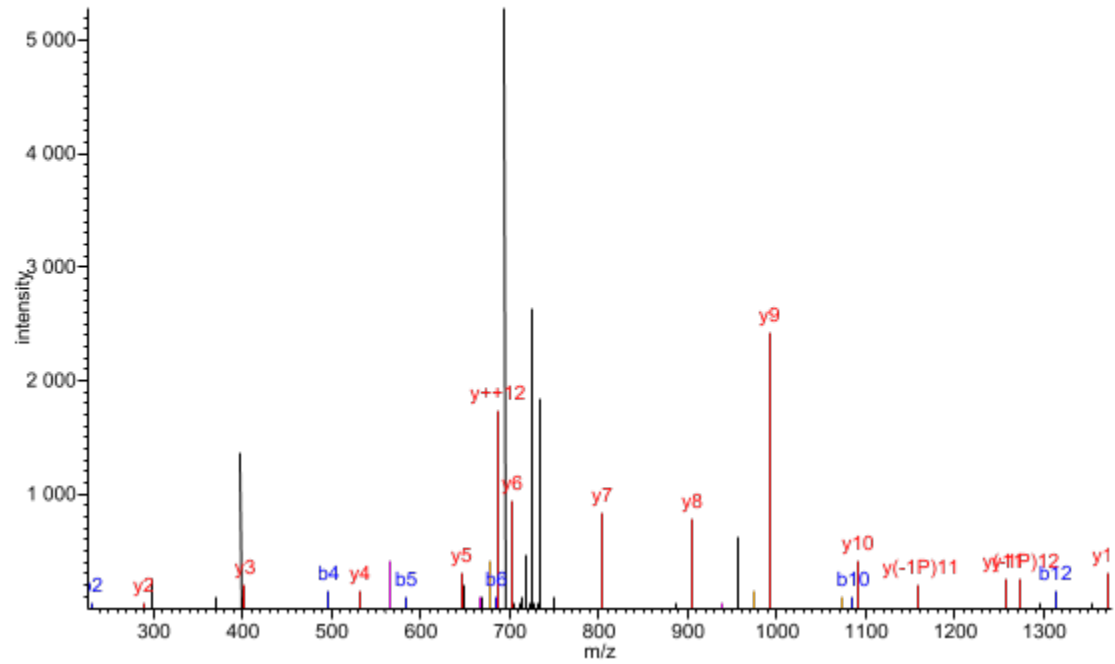

Peptide: IGPSTDAIDTWNQHK  
Protein: GRMZM2G055331\_P01; S168  
e-value: 1.5E-5

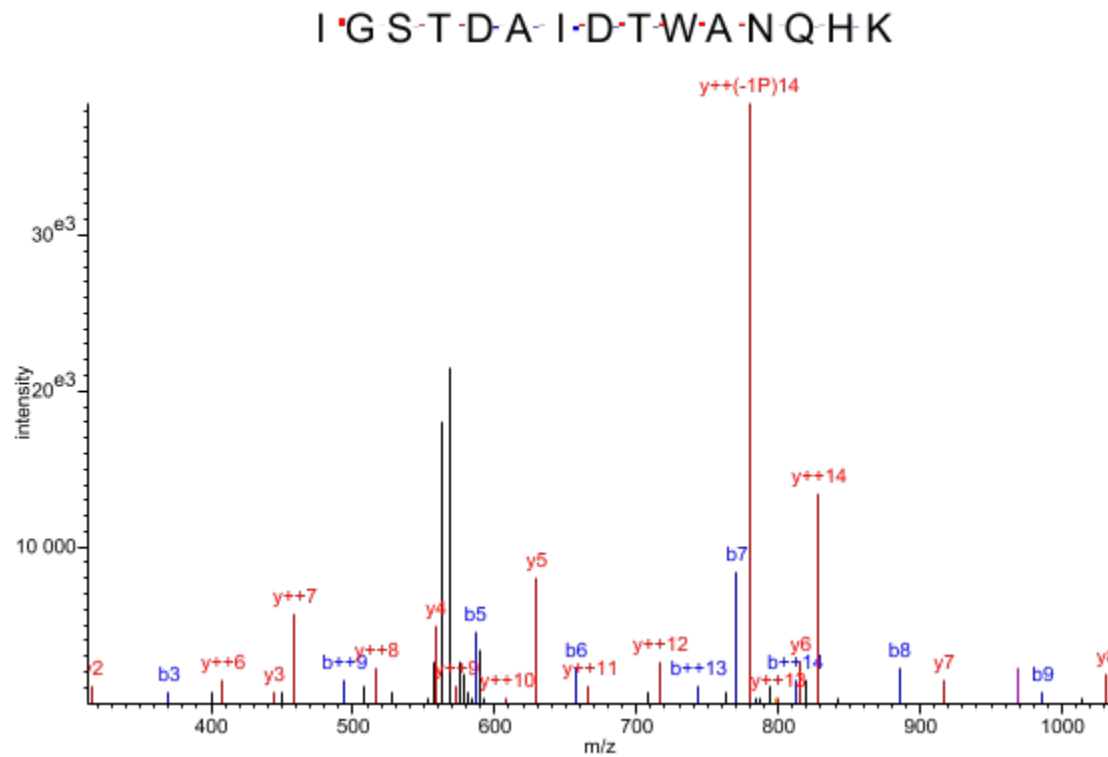

Peptide: NDVAAEISEADpSPEDSLR  
Protein: GRMZM2G055331\_P08; S95  
e-value: 1.0E-13

NDVAAEISEADpSPEDSLR

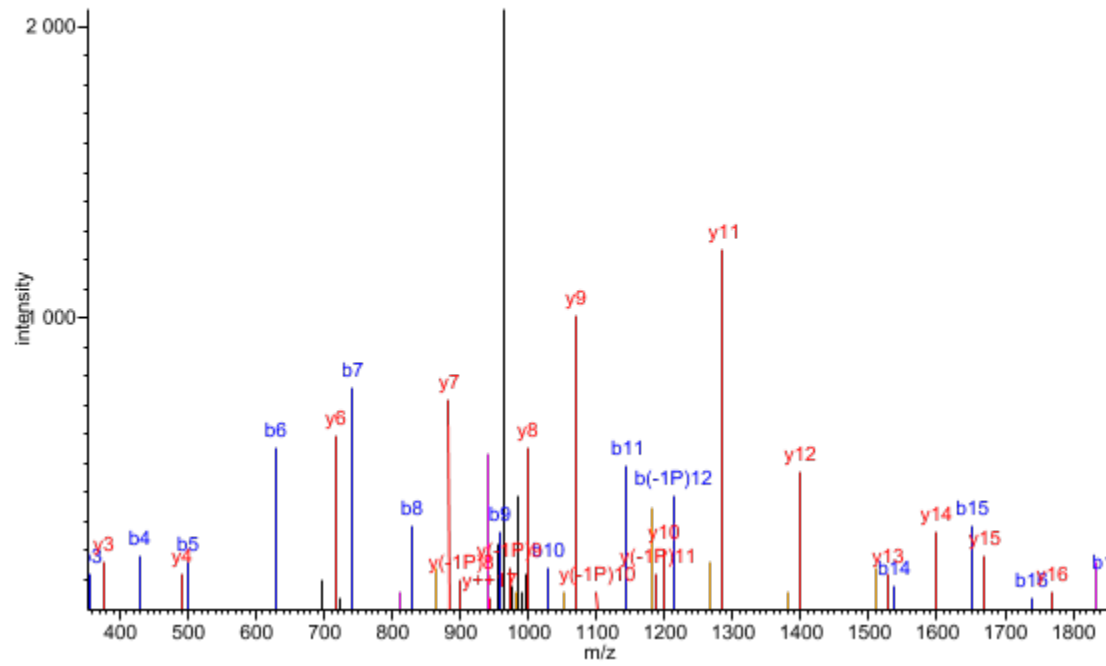

Peptide: IMpTSLMGQKPATSE

Protein: GRMZM2G060659\_P02; T846

e-value: 2.5E-7

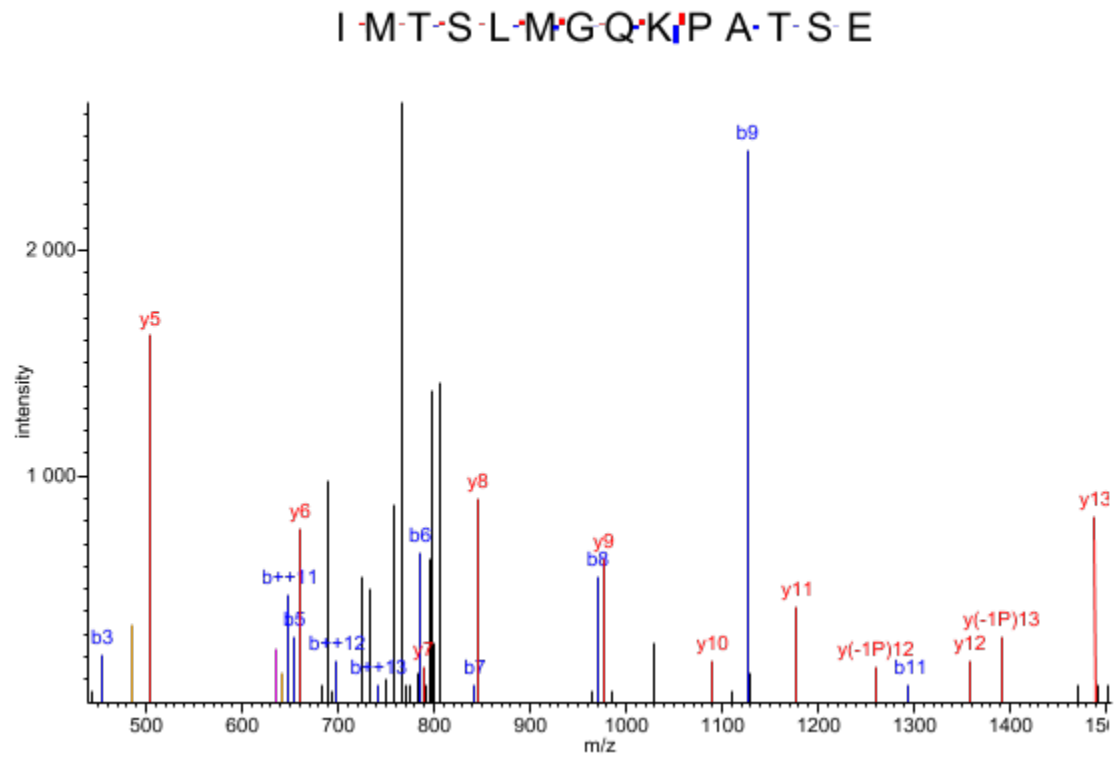

Peptide: LELSAVPSSYYSGQLDPDR  
Protein: GRMZM2G039588\_P02; S158  
e-value: 1.2E-14

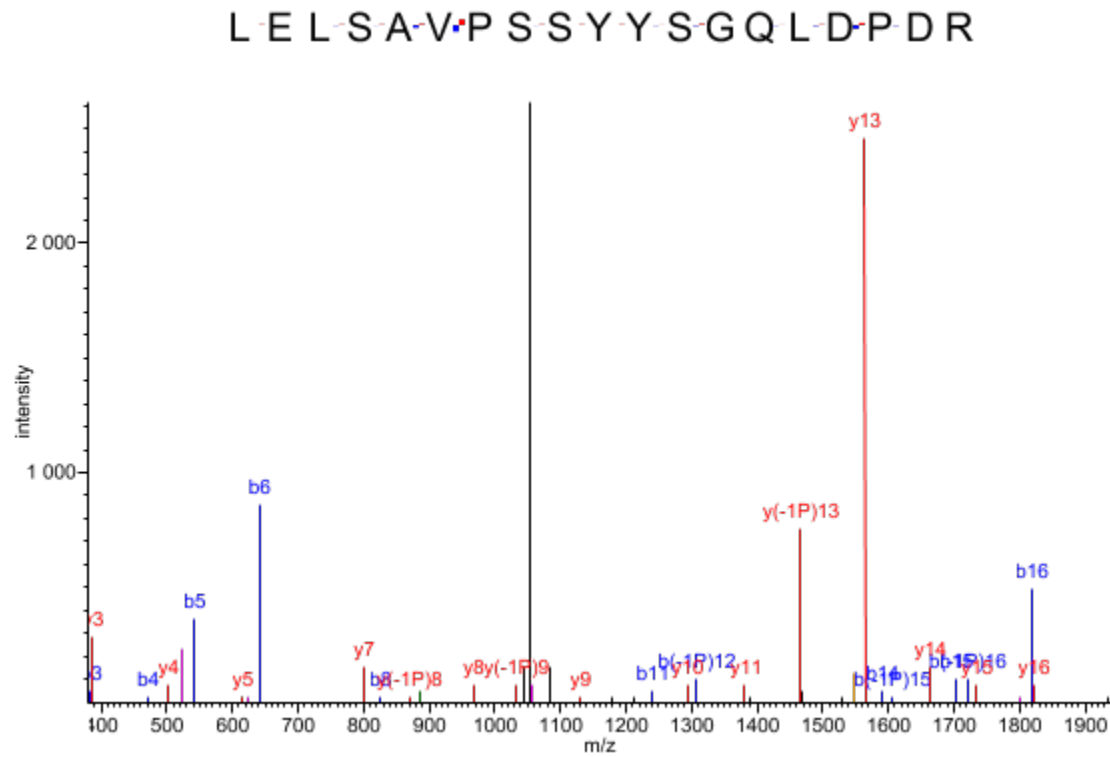

Peptide: ATGAFILTApSHNPGGPTEDFGIK

Protein: GRMZM2G023289\_P03; S106

e-value: 1.5E-13

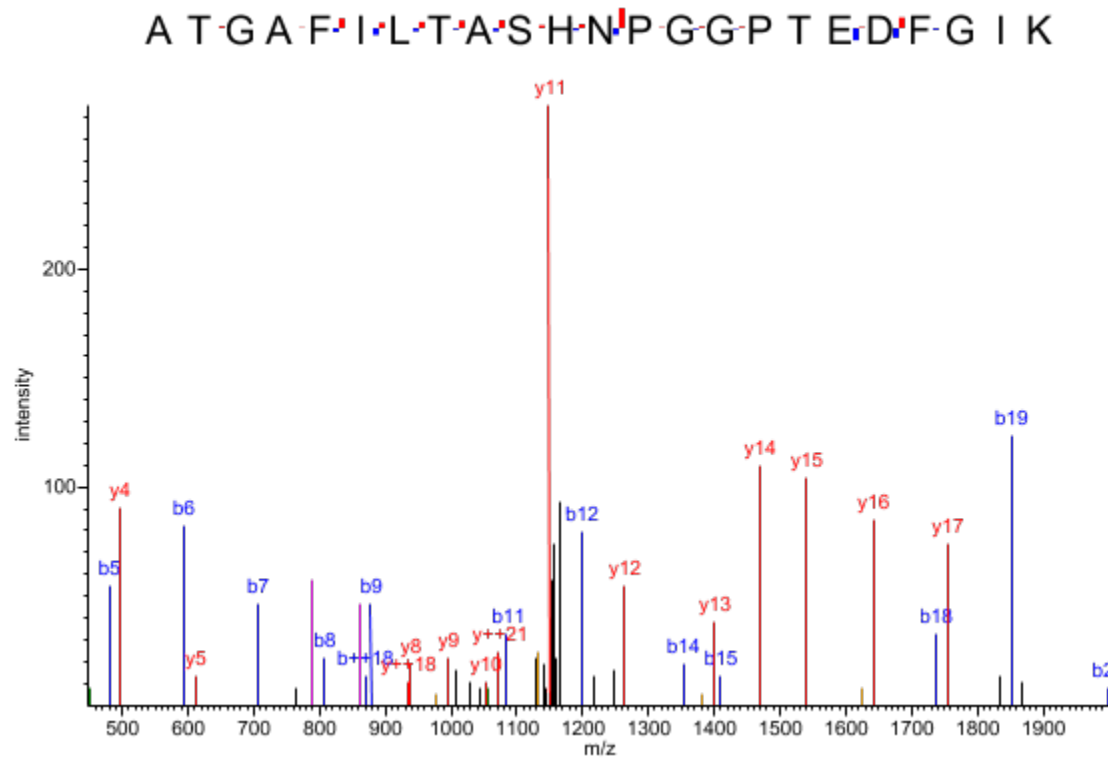

Peptide: GGGpSPVAAVQDASDDGAR  
Protein: tr|B6U8S7|B6U8S7\_MAIZE; S5  
e-value: 8.8E-11

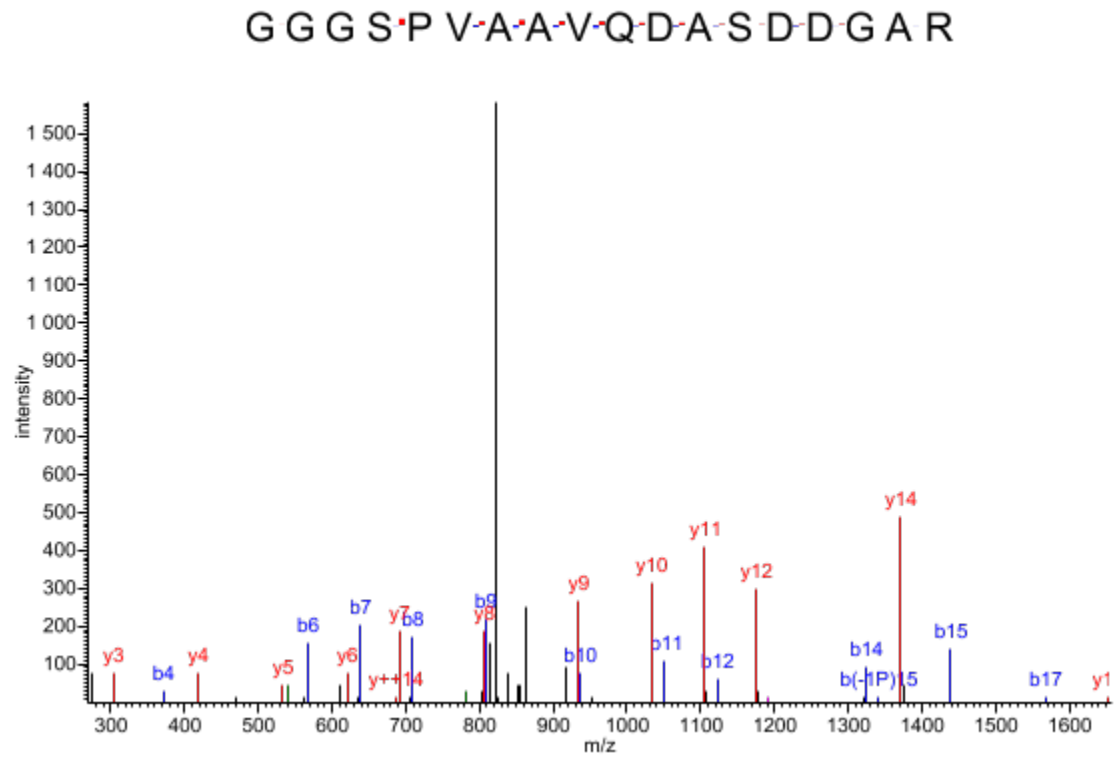



Peptide: NApSSVSLADAAYVK  
Protein: GRMZM2G004932\_P01; S79  
e-value: 3.3E-10

N A S S V S L A D A A Y V K

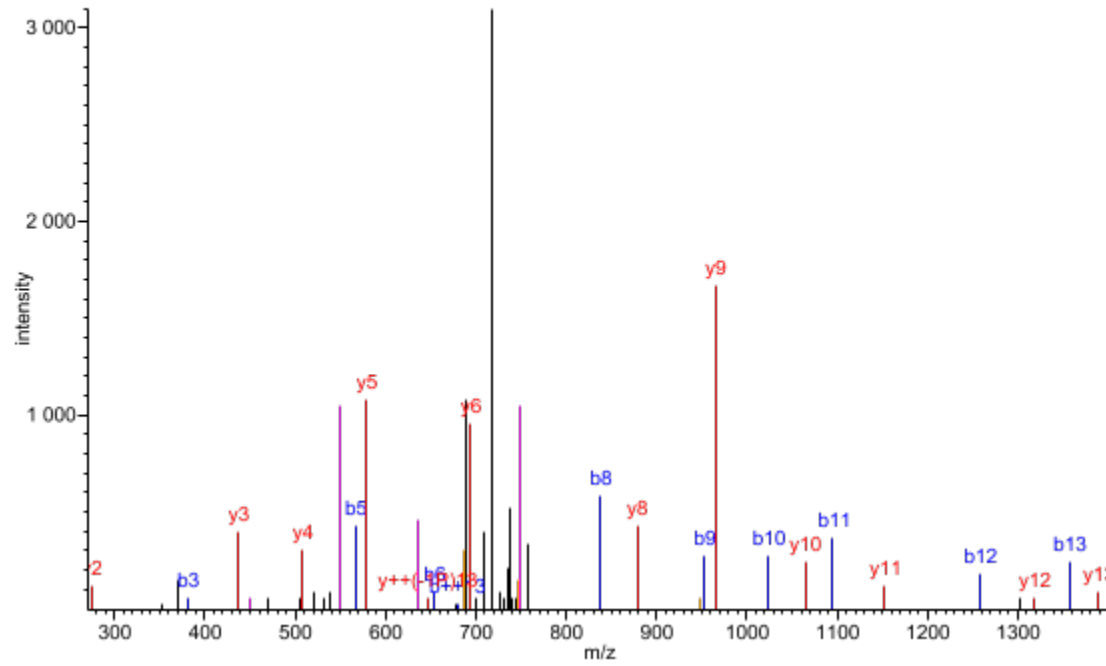

Peptide: VGQPSHGGGGASTASPR  
Protein: GRMZM2G071249\_P01; S49  
e-value: 2.6E-8

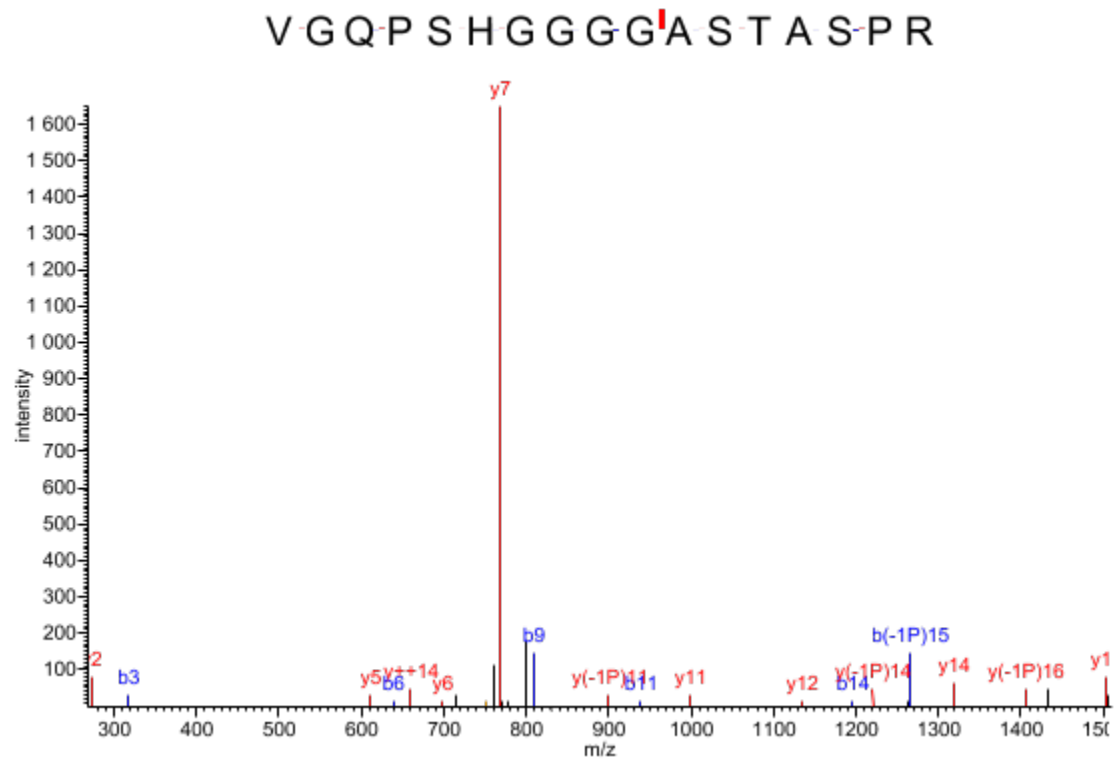

Peptide: DAAVDGAP(SDT)DGAVAETR  
Protein: tr|B8A0C4|B8A0C4\_MAIZE; S900/T902  
e-value: 4.4E-19

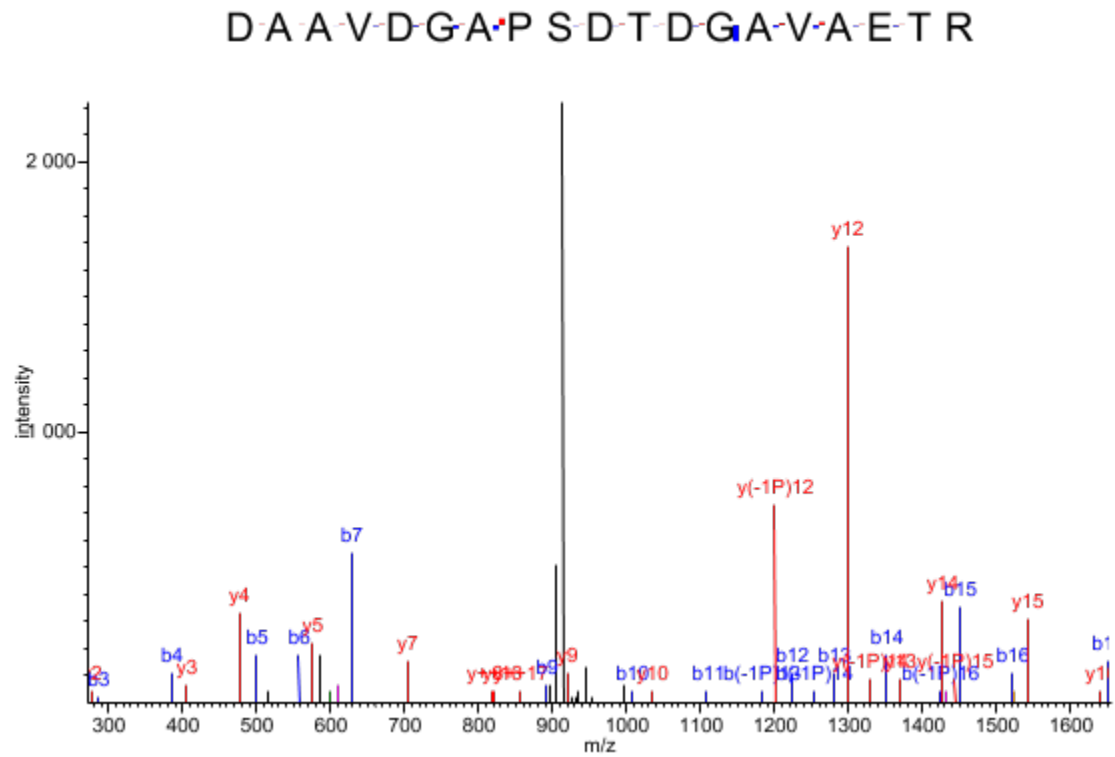

Peptide: SSSSASGAApSPTADR

Protein: tr|C0PCF2|C0PCF2\_MAIZE; S56

e-value: 8.4E-11

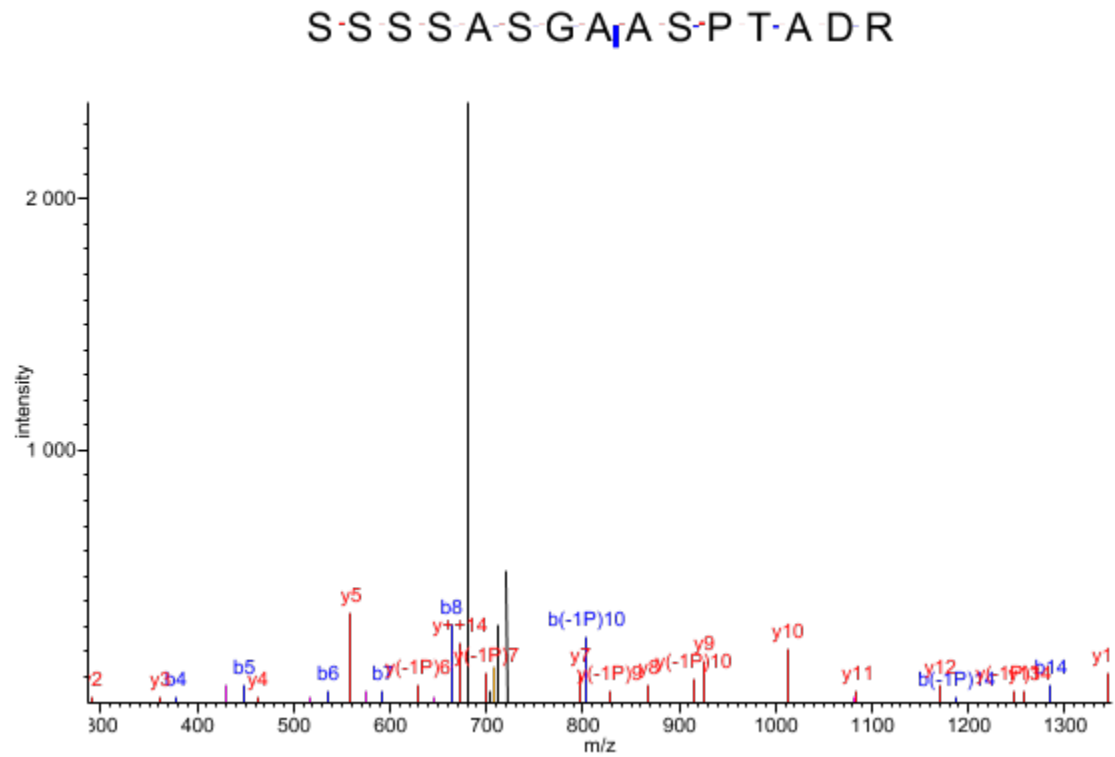

Peptide: STpSSLNASSATR  
Protein: GRMZM2G012031\_P01; S59  
e-value: 8.2E-9

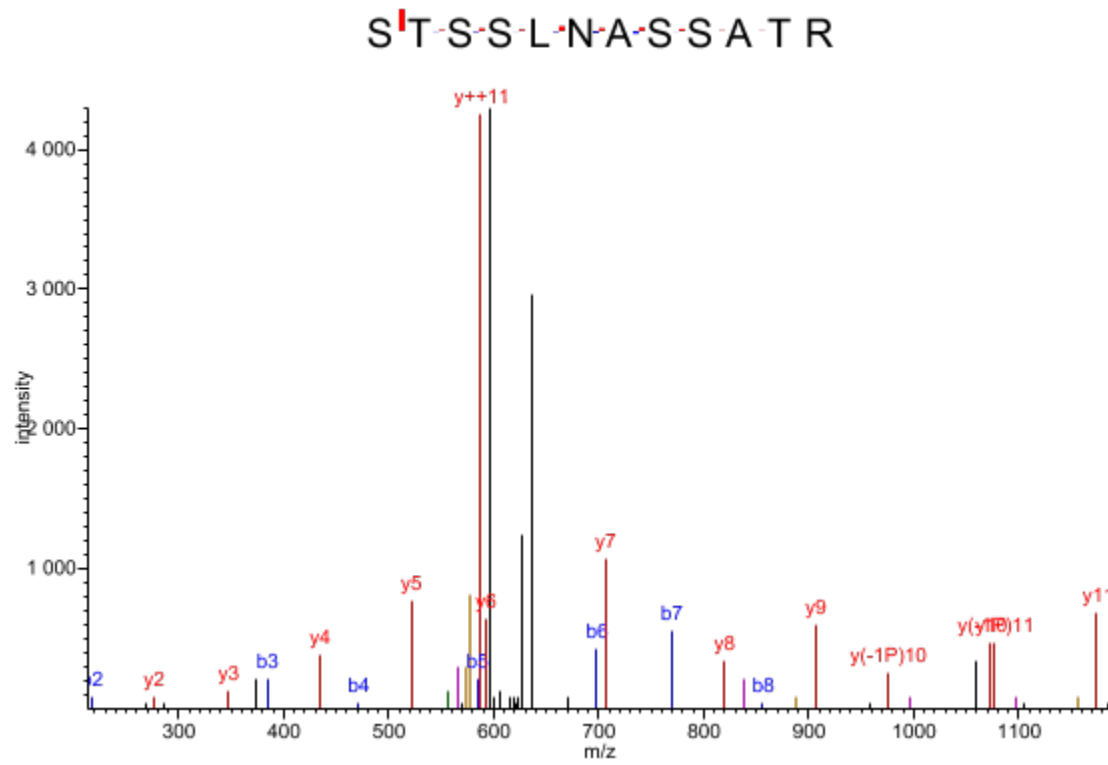

Peptide: LTSGQQIp(SGEIPDAS)PDR  
Protein: GRMZM2G027723\_P01; S158/S165  
e-value: 5.2E-10

L T S G Q Q I S G E I P D A S P D R

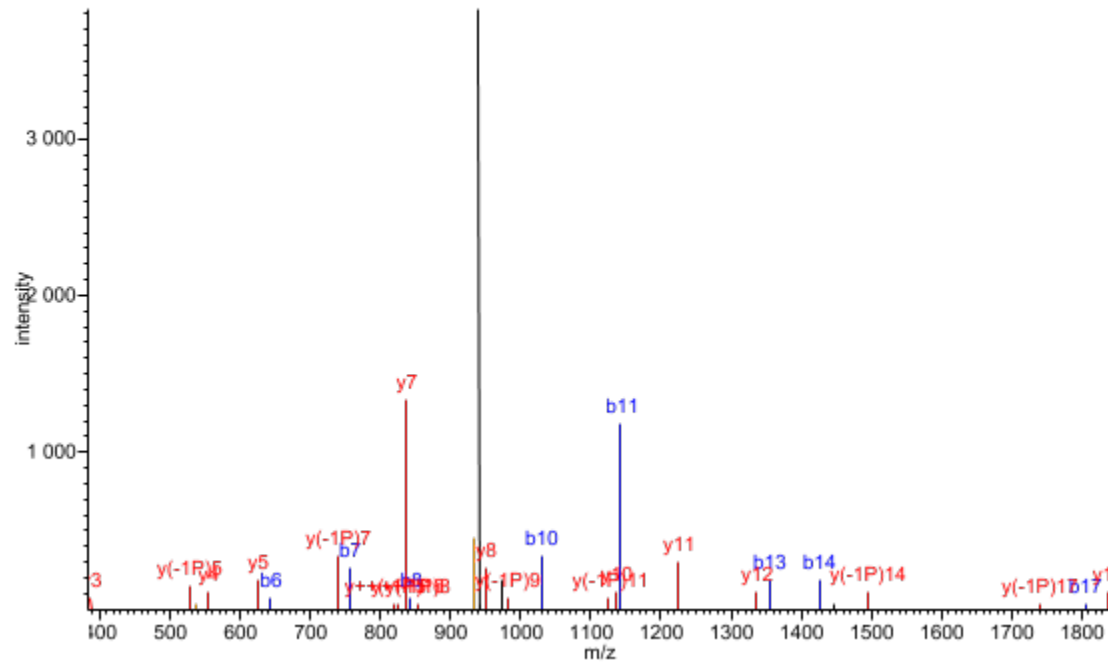

Peptide: TRpSVNAVVEDAK  
Protein: GRMZM2G015875\_P02; S934  
e-value: 1.9E-4

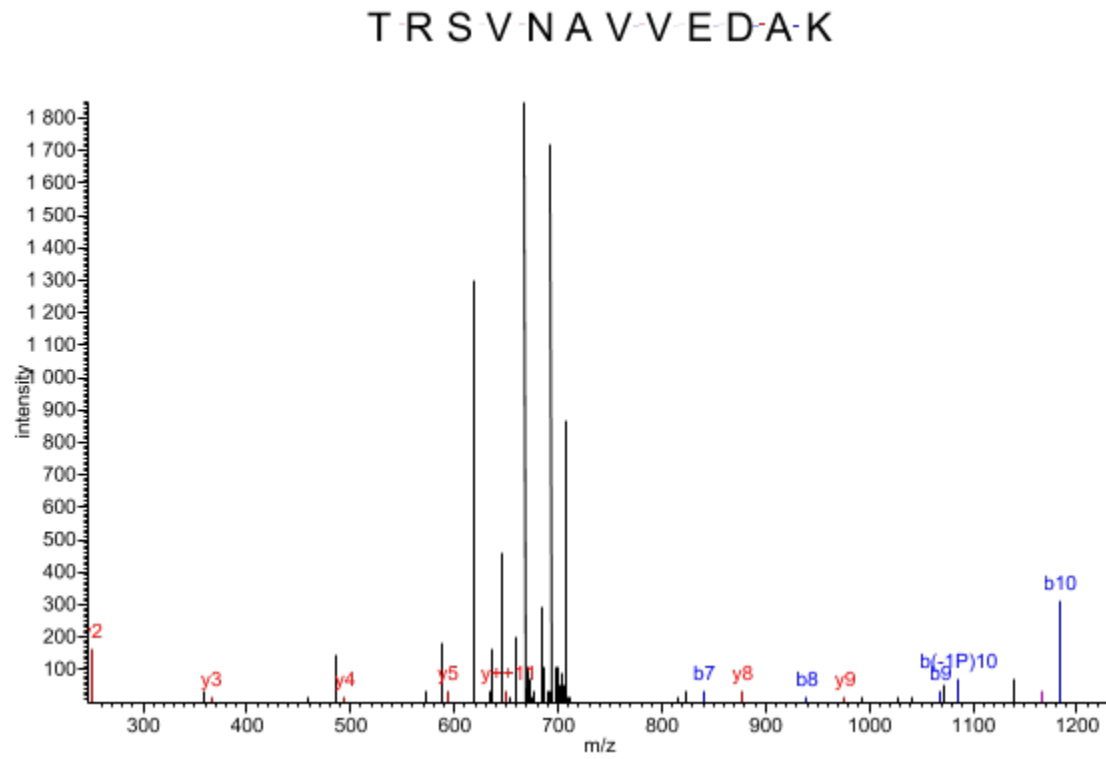

Peptide: AIPSPASSSHGR

Protein: GRMZM2G097900\_P01; S66

e-value: 8.5E-6

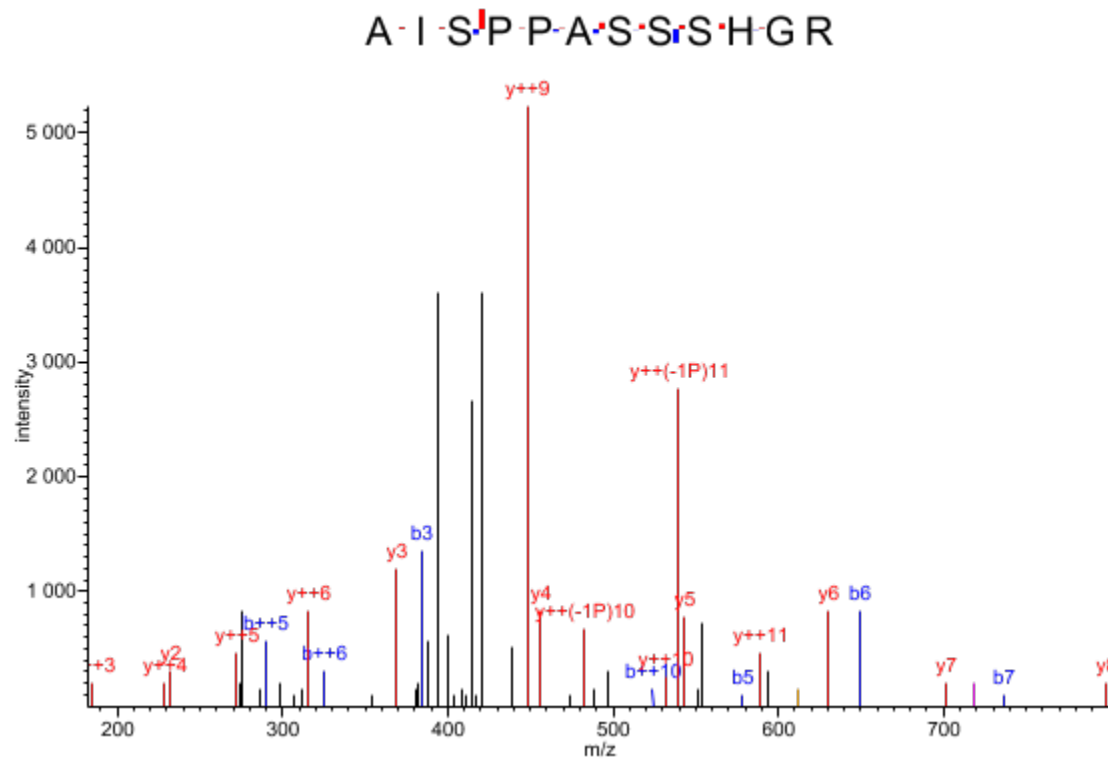



Peptide: DYEPTGEPVPR  
Protein: GRMZM2G320689\_P04; T952  
e-value: 8.5E-6

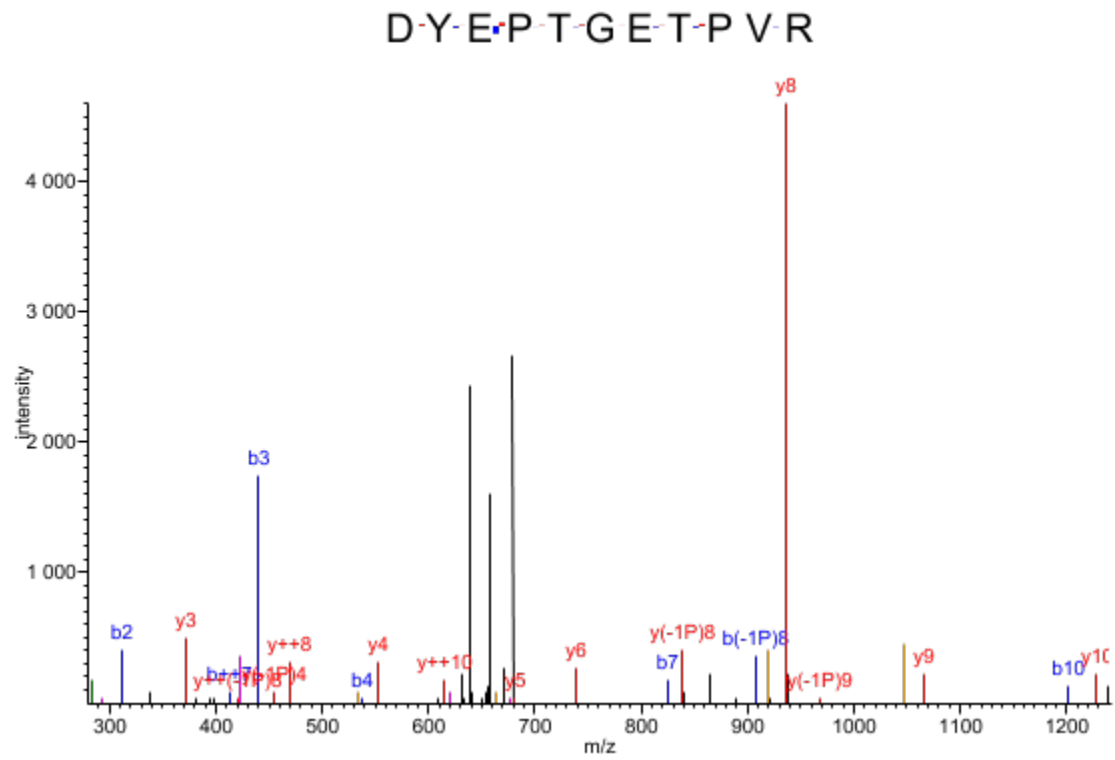

Peptide: p(ST)ATTSGTIK

Protein: tr|B6SKE1|B6SKE1\_MAIZE; S74/T75

e-value: 6.6E-5

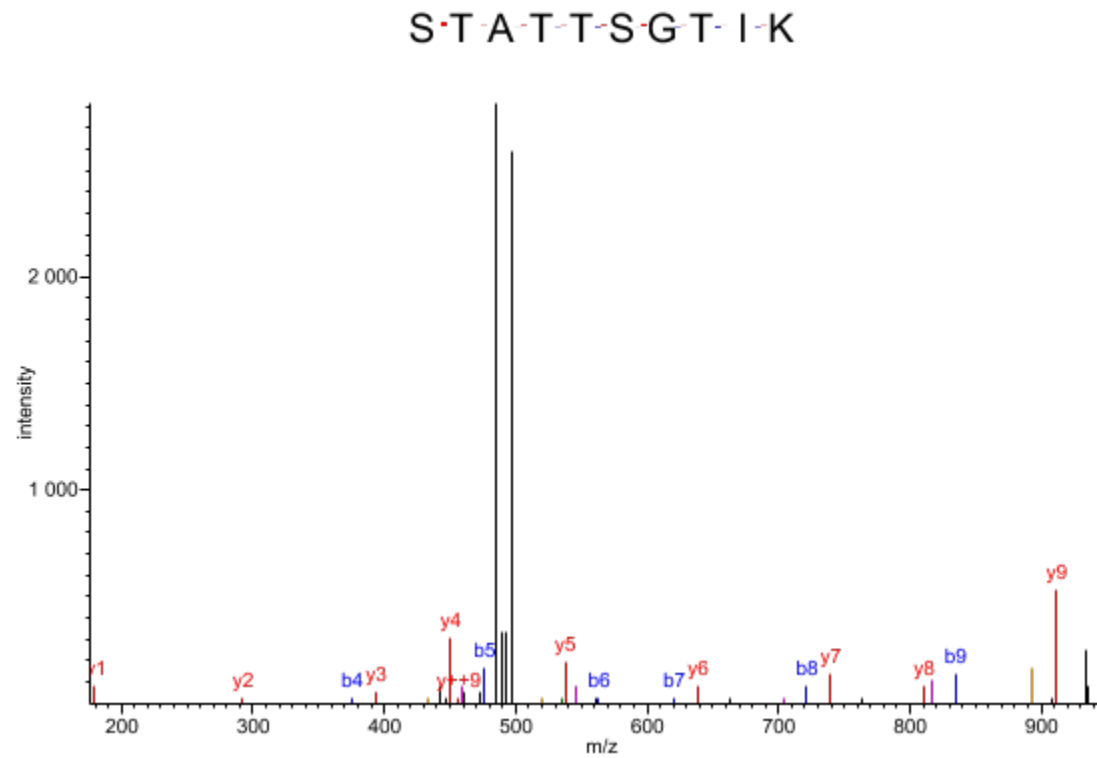

Peptide: SFQSQpSPAK

Protein: GRMZM2G128206\_P02; S79

e-value: 1.3E-3

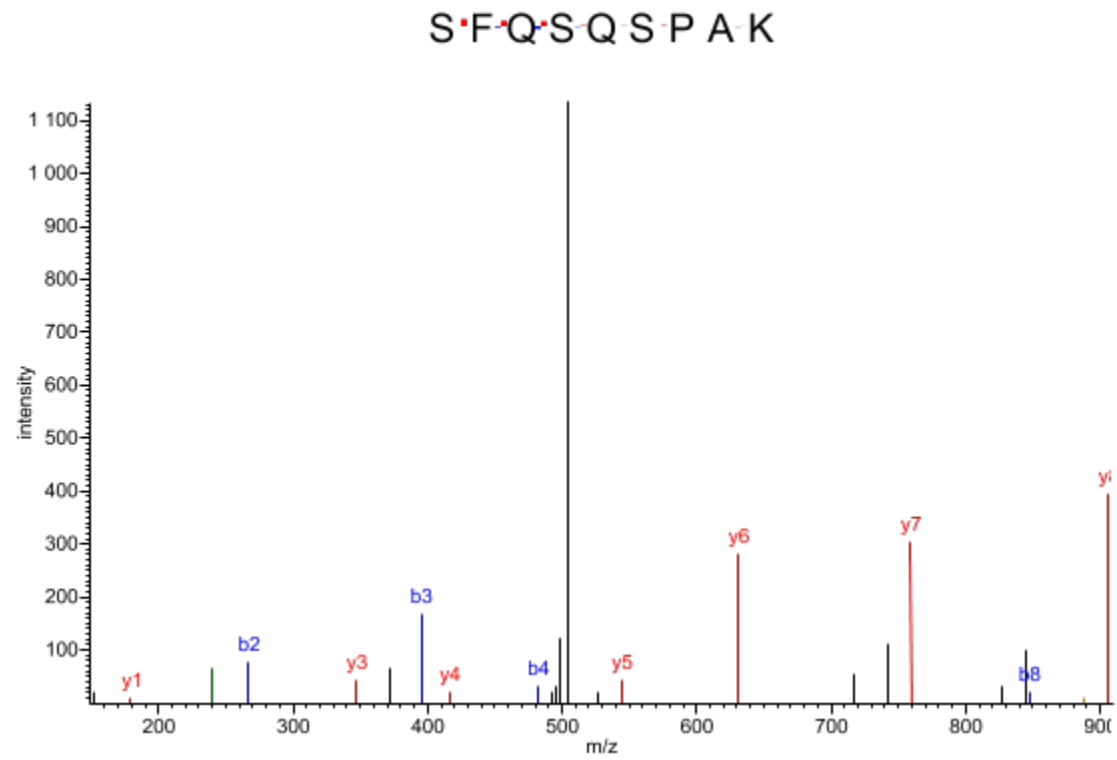

Peptide: TDASLDGETATSpTPR  
Protein: GRMZM2G052078\_P02; T1161  
e-value: 4.1E-12

T·D·A·S·L·D·G·E·T·A·T·S·T·P·R

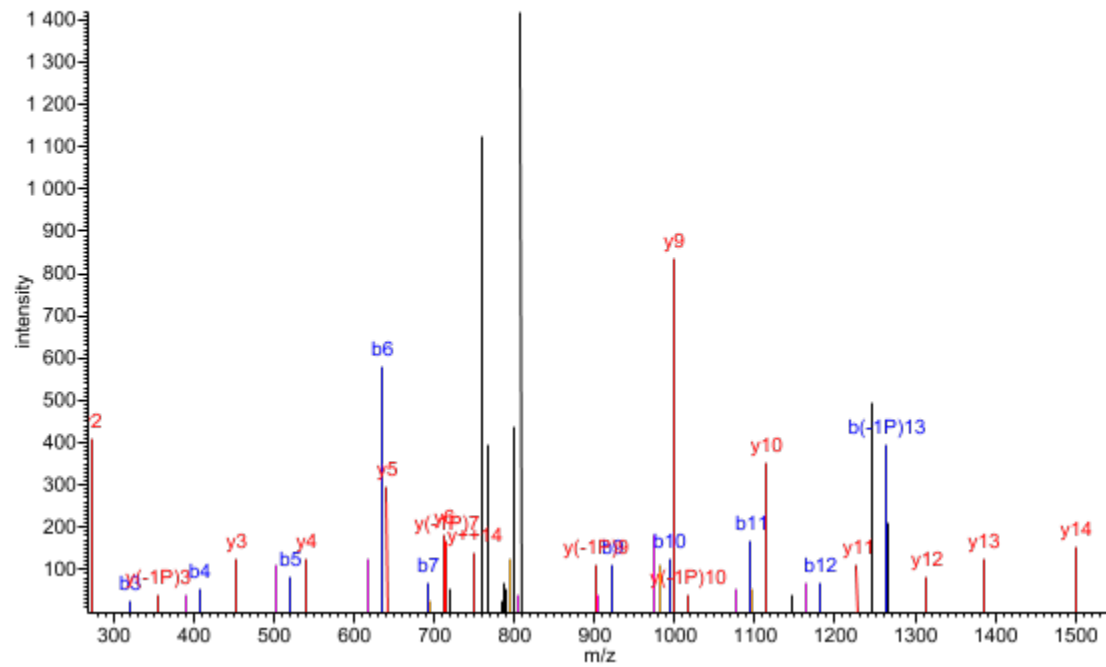

Peptide: LSVAAQAAAIQPSpSPR  
Protein: tr|B6TBM4|B6TBM4\_MAIZE; S35  
e-value: 3.9E-12

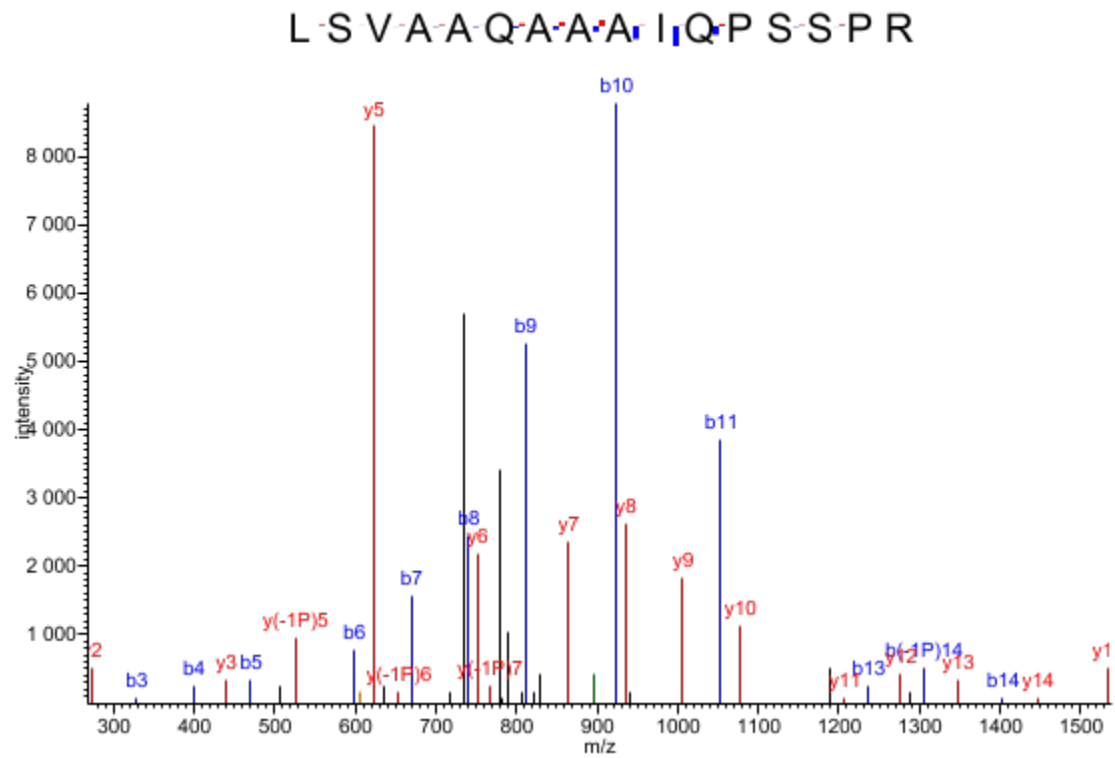

Peptide: LSAAAQAAAIQPSpSPR  
Protein: tr|B4FCK0|B4FCK0\_MAIZE, S30  
e-value: 1.1E-12

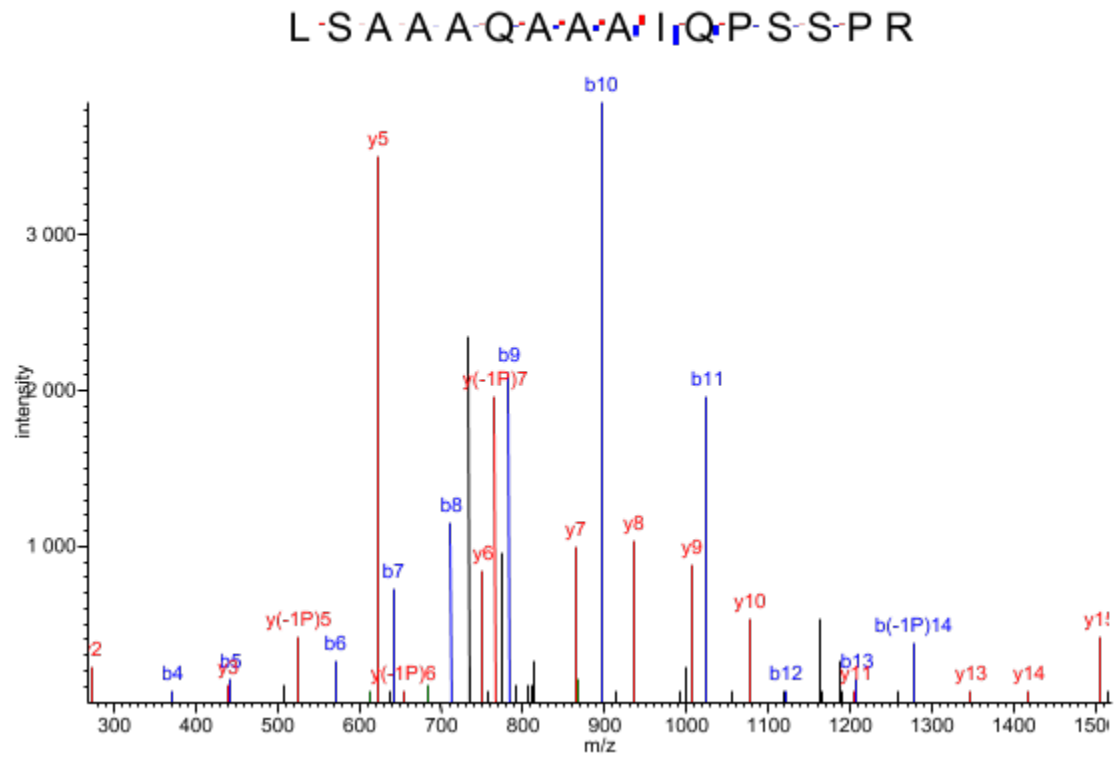

Peptide: VTpSSTVETSK

Protein: GRMZM2G406674\_P02; S345

e-value: 1.4E-3

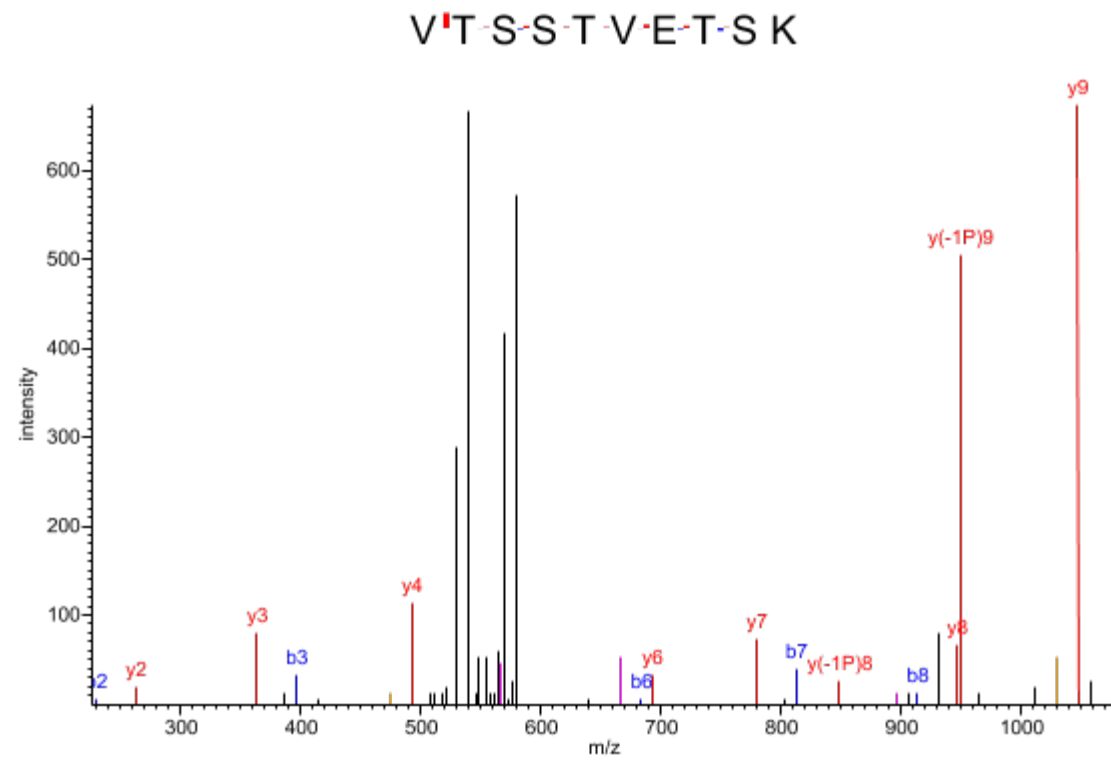

Peptide: TApSPGNSAAATAPVGLTATAK

Protein: GRMZM2G465169\_P01; S557

e-value: 1.8E-15

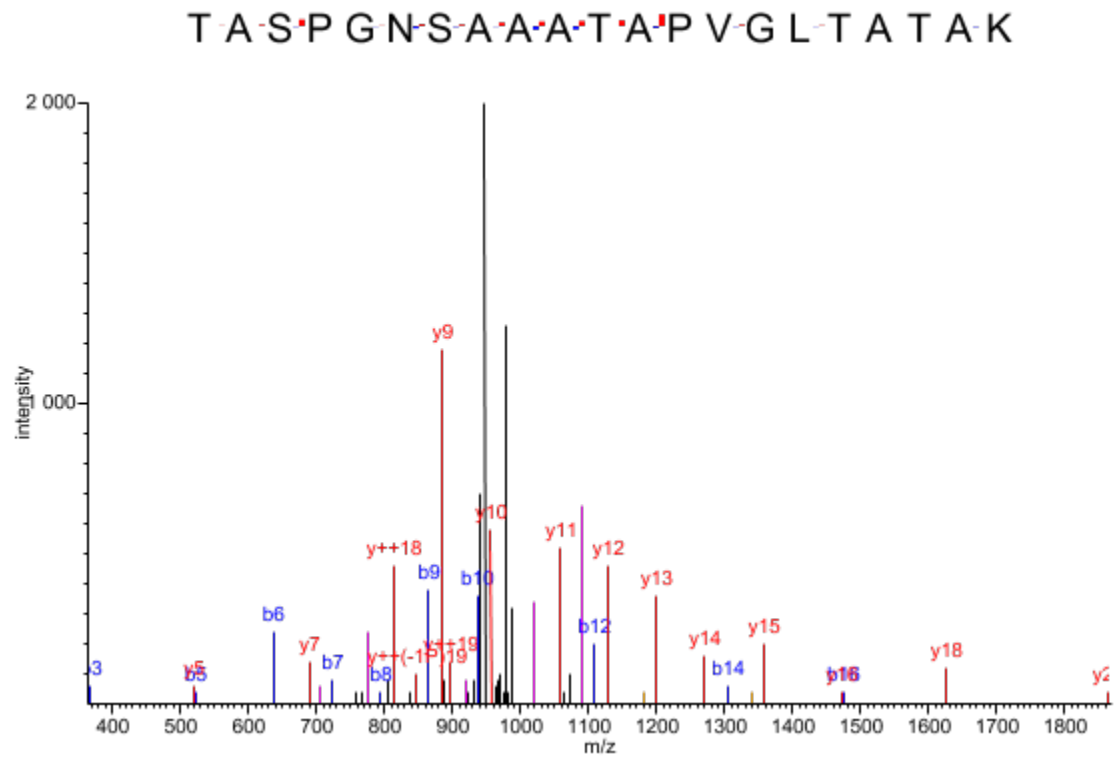



Peptide: ESTGSGpSNTYVETETLAK

Protein: tr|B4FT16|B4FT16\_MAIZE; S221

e-value: 6.9E-7

E S T G S G S N T Y V E T E T L A K

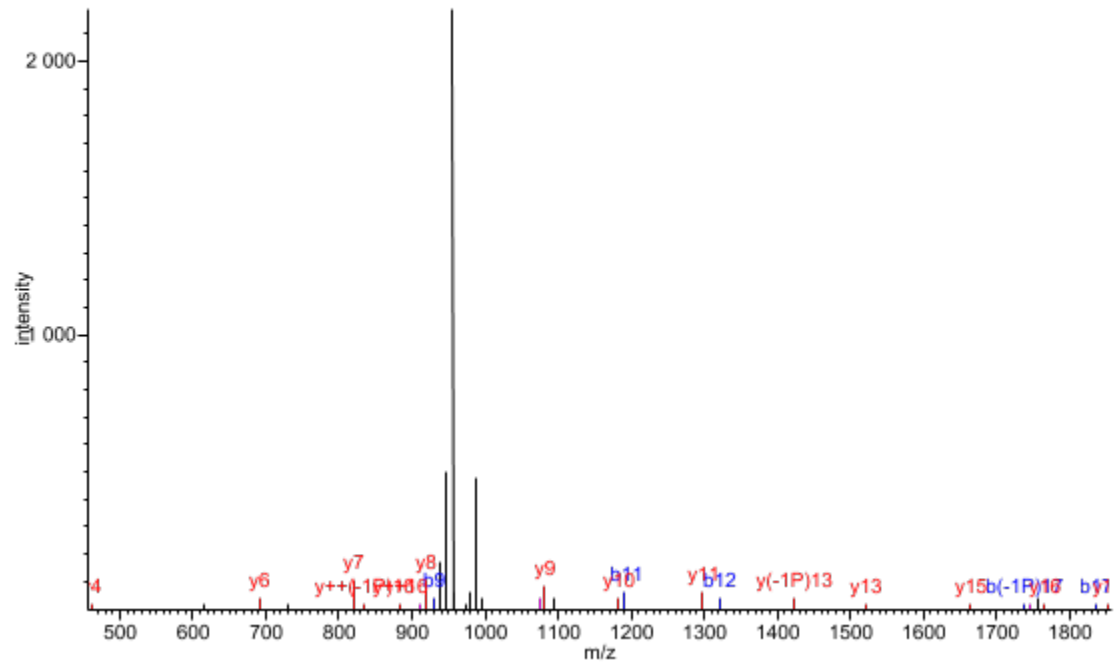

Peptide: TIp(SS)ASSIGSAEGTSEQTK

Protein: tr|B8A180|B8A180\_MAIZE; S312/S313

e-value: 8.4E-14

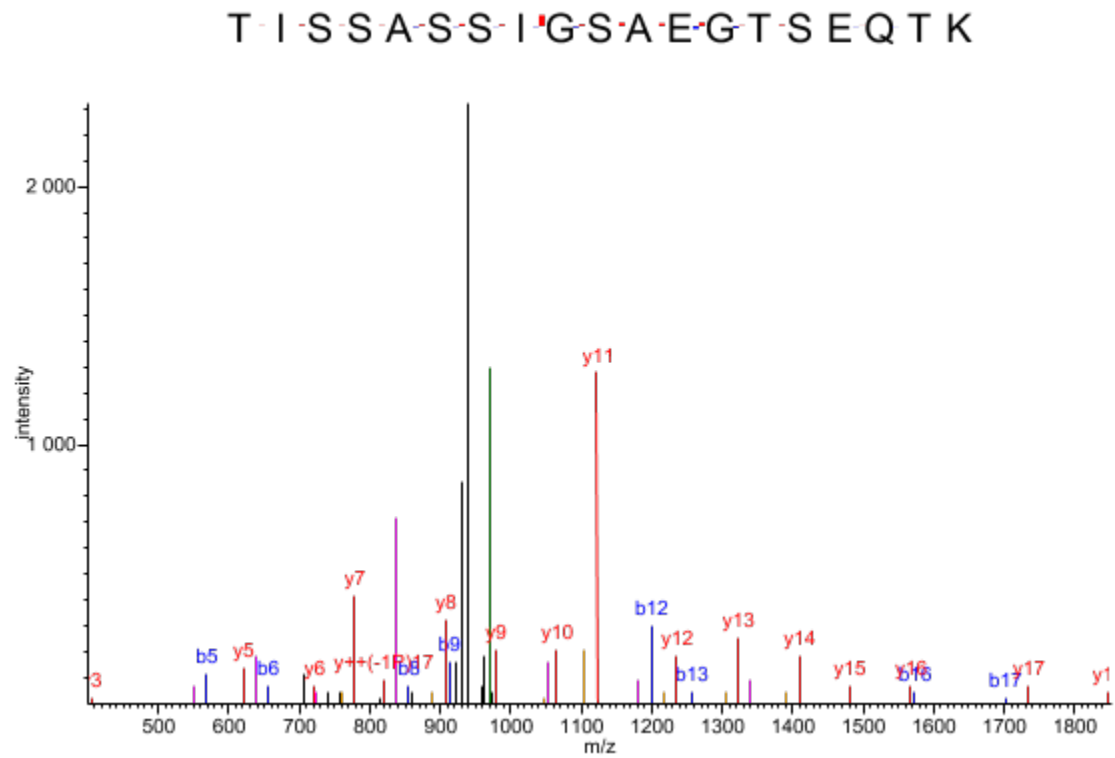

Peptide: TIp(SSAS)SIGSSEGTSEQTK

Protein: GRMZM2G341732\_P02; S340/S341/S343

e-value: 9.4E-13

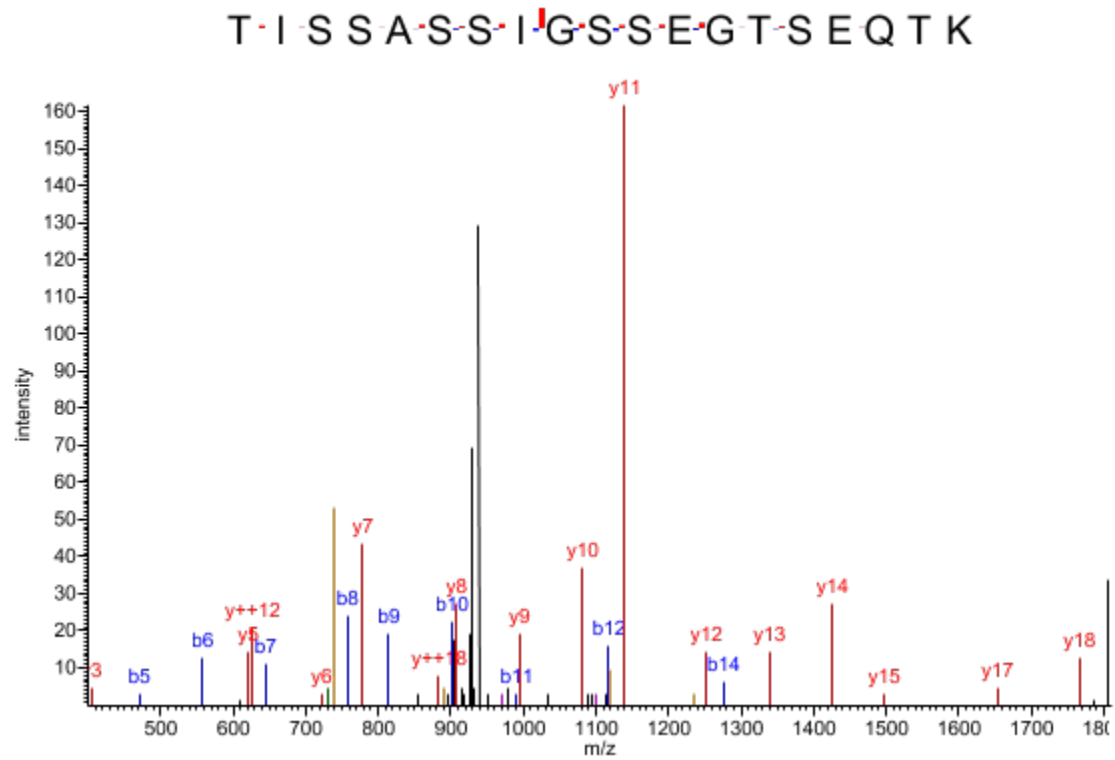

Peptide: EADGpSSPVVRPVR

Protein: tr|B8A180|B8A180\_MAIZE; S241

e-value: 3.2E-4

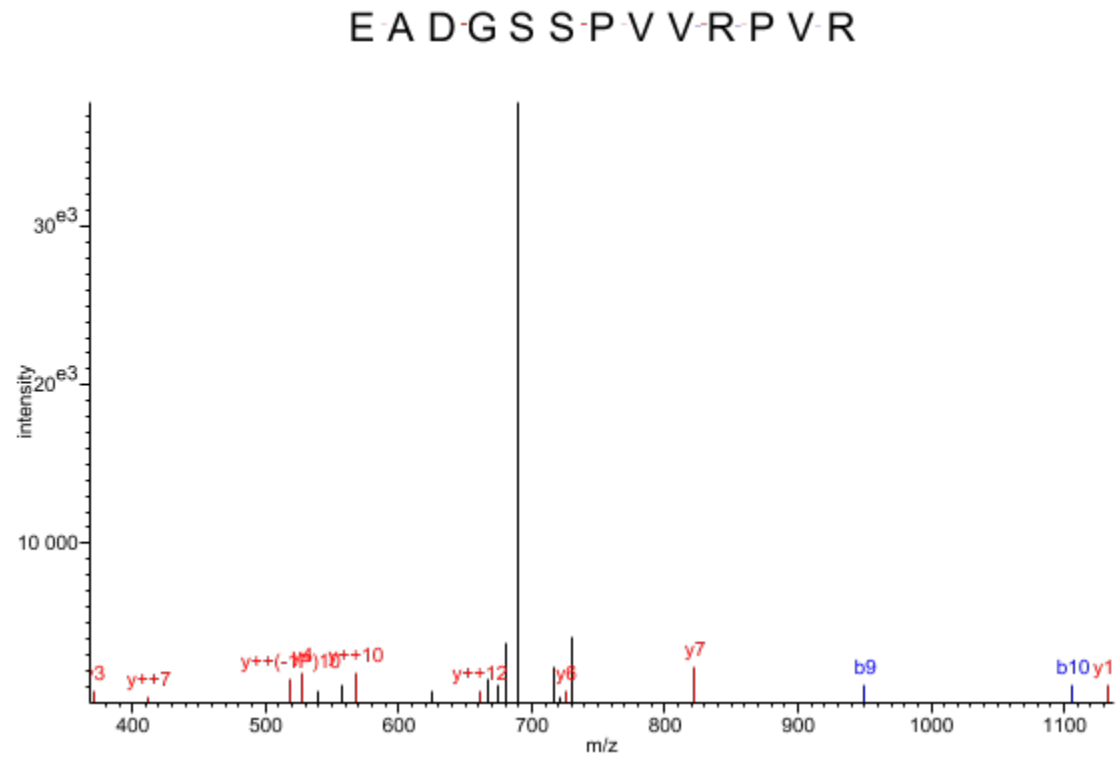

Peptide: LTSLApSNFISDLDR  
Protein: GRMZM2G176612\_P02; S406  
e-value: 4.4E-8

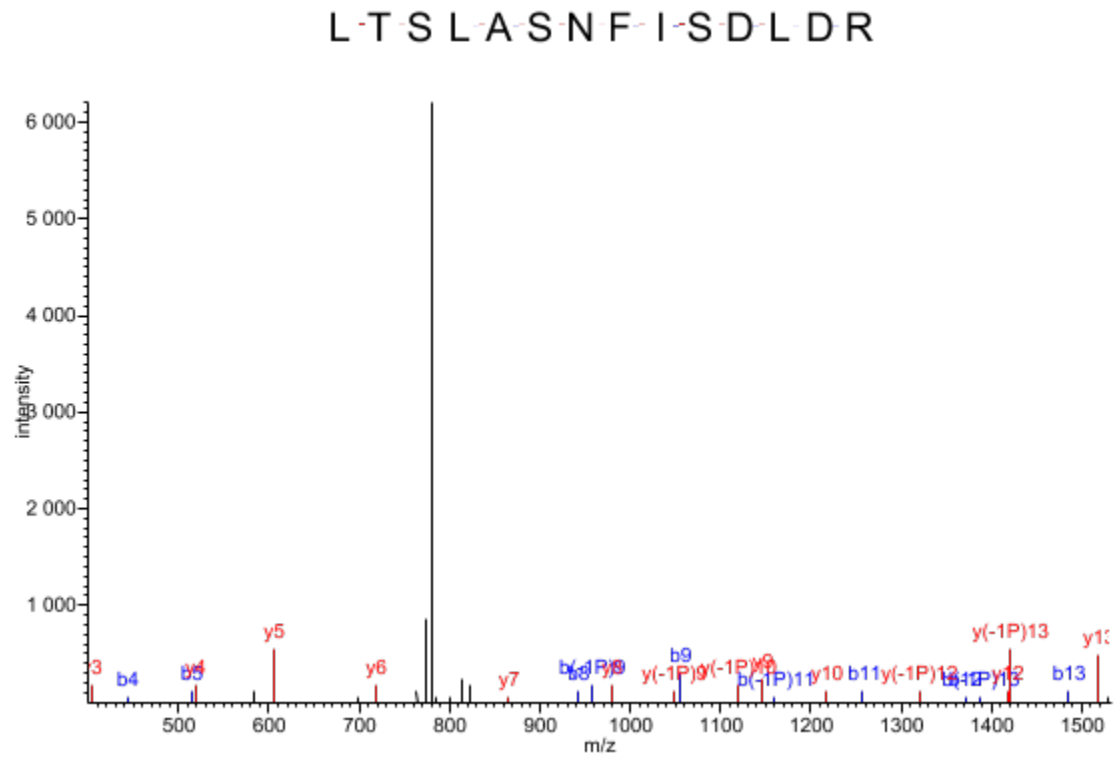

Peptide: MPpSQIVSDTQESGV IHEEVIPNPPVEAPK

Protein: GRMZM2G092741\_P01; S65

e-value: 4.8E-8

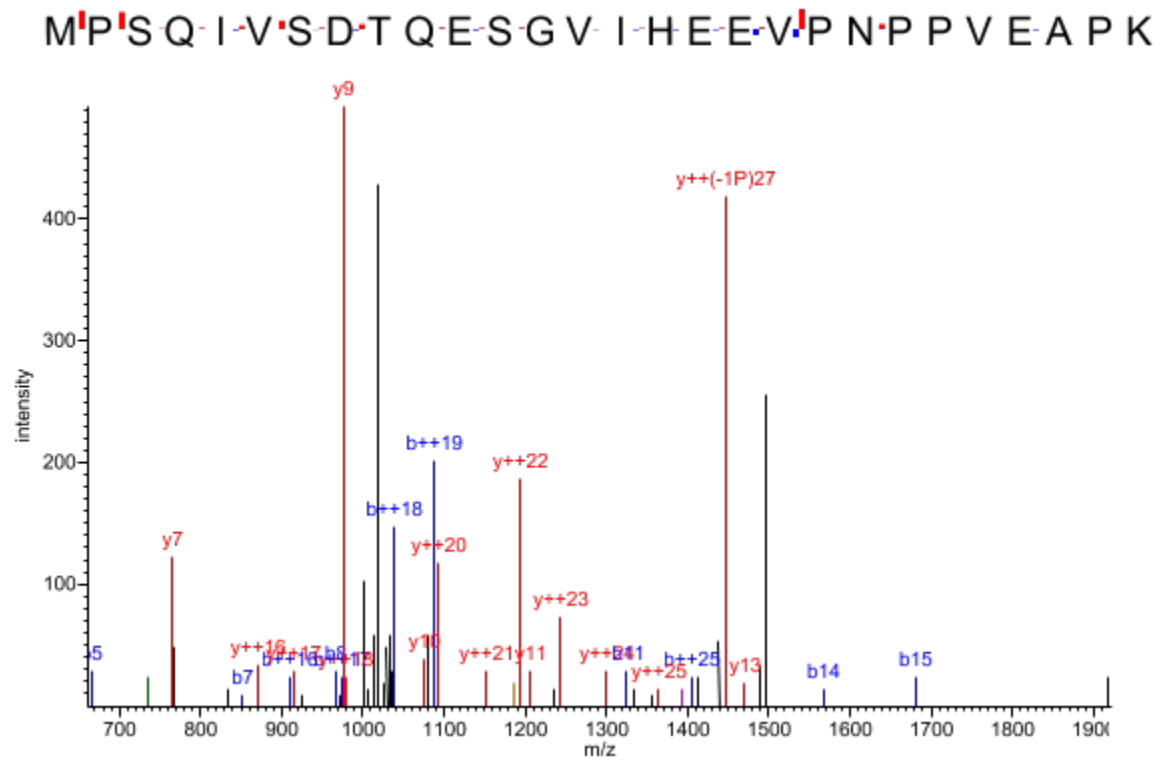

Peptide: DSYGDGEAYpSSR  
Protein: GRMZM2G178398\_P01; S273  
e-value: 8E-8

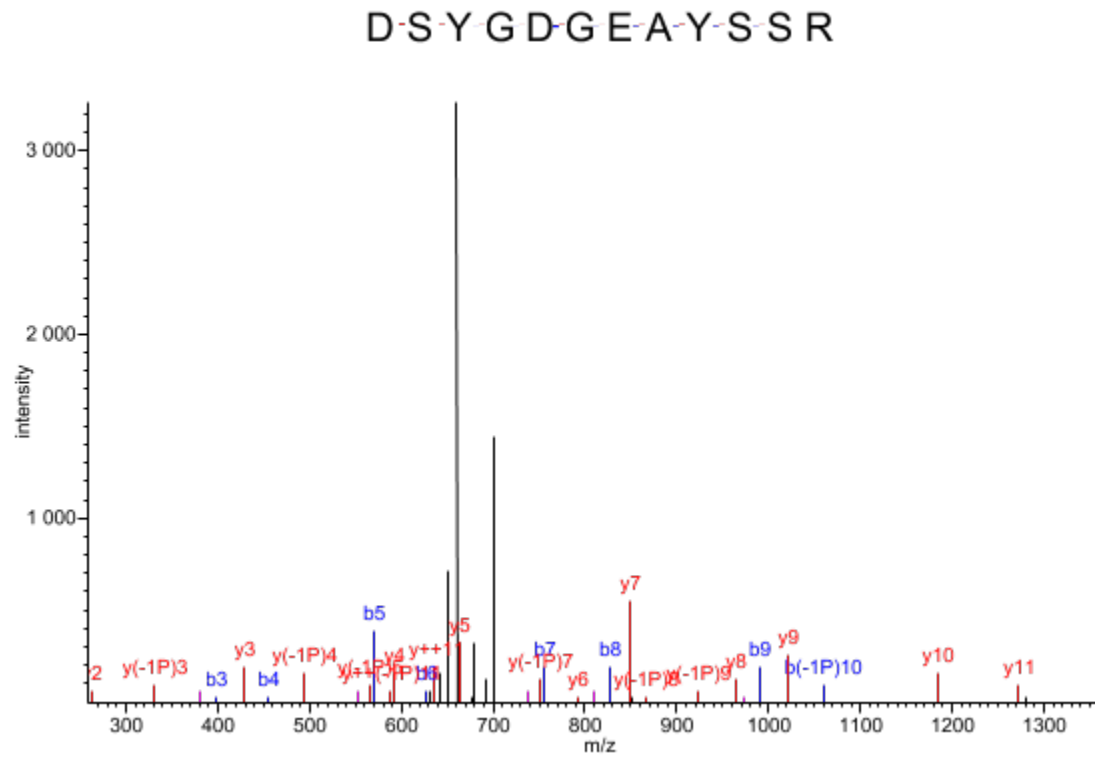

Peptide: SLpTTTSASSR

Protein: GRMZM2G103345\_P02; T278

e-value: 1.2E-5

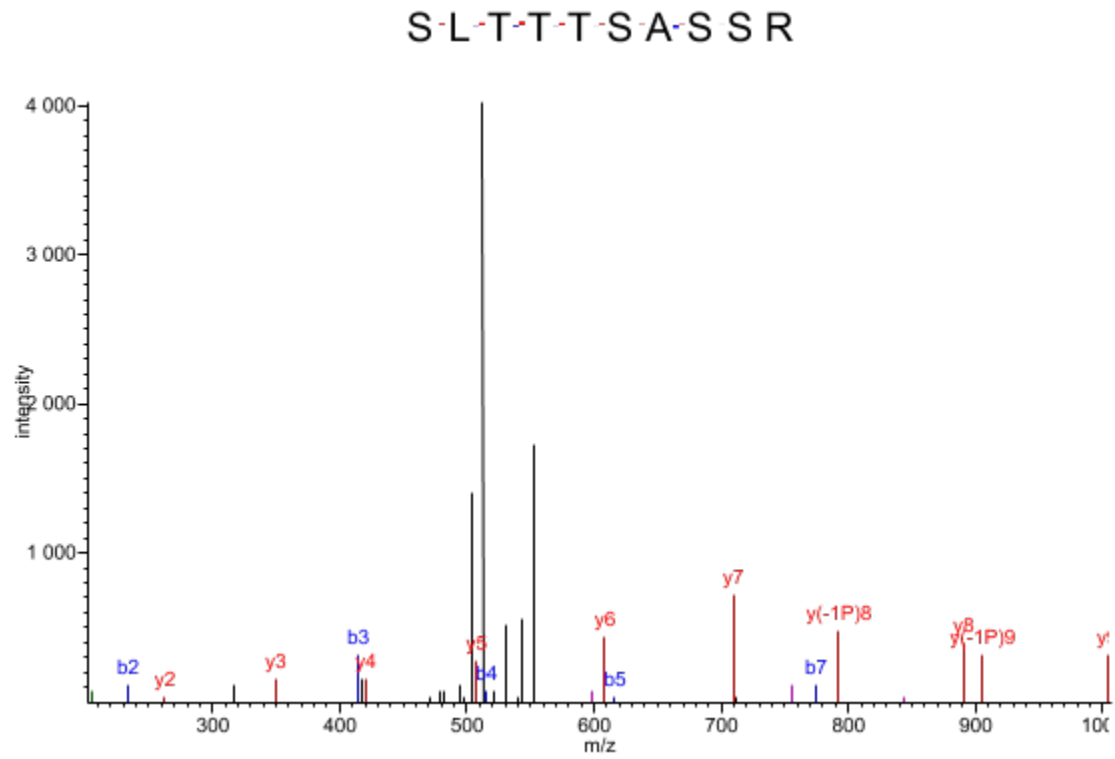



Peptide: AEAENGEGpSGENNVATK  
Protein: GRMZM2G125648\_P01; S159  
e-value: 1.8E-7

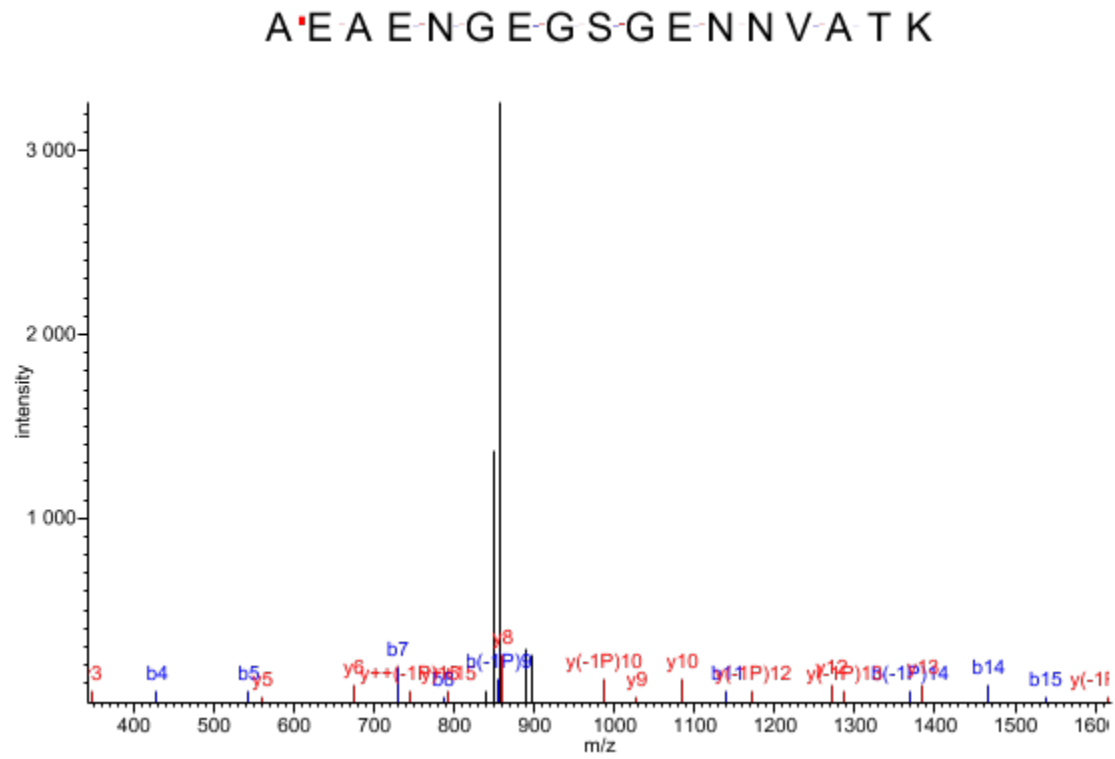

Peptide: TEGGApSPAPAGDGSTPVK  
Protein: tr|B6TWE3|B6TWE3\_MAIZE; S151  
e-value: 2.6E-8

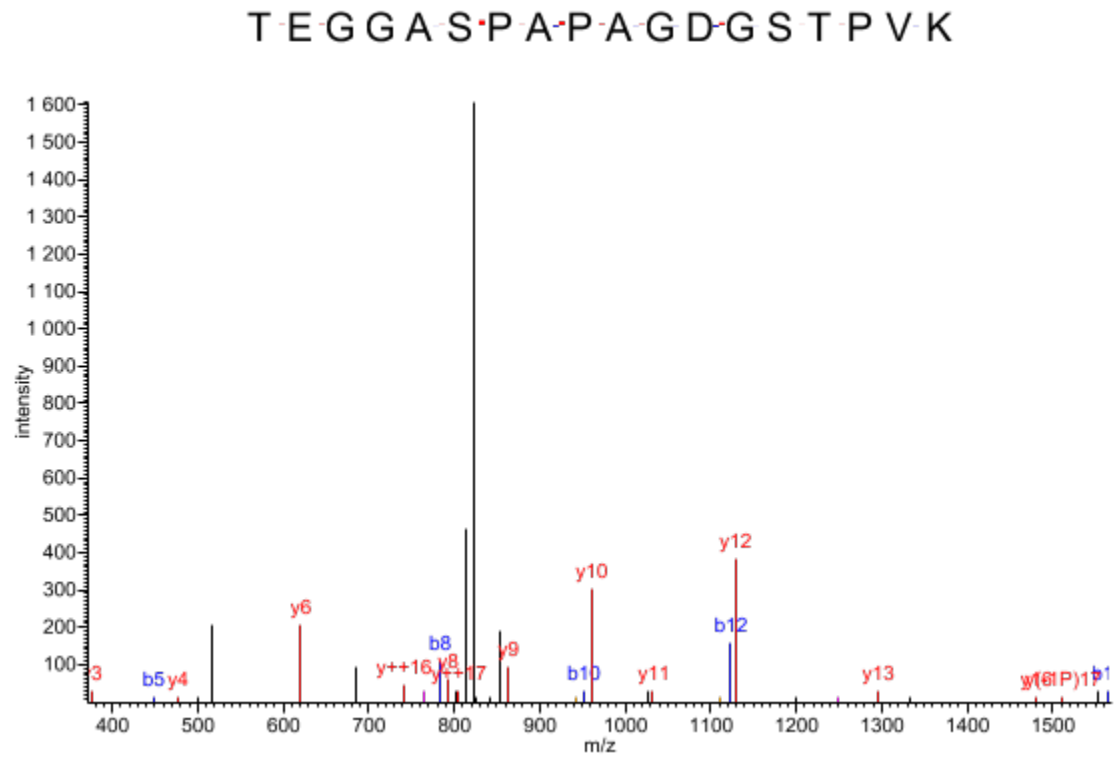

Peptide: TDGAAp(SPS)PSPAPAPAGDGSTPGK  
Protein: tr|Q9FYS5|Q9FYS5\_MAIZE; S155/S157  
e-value: 3.1E-15

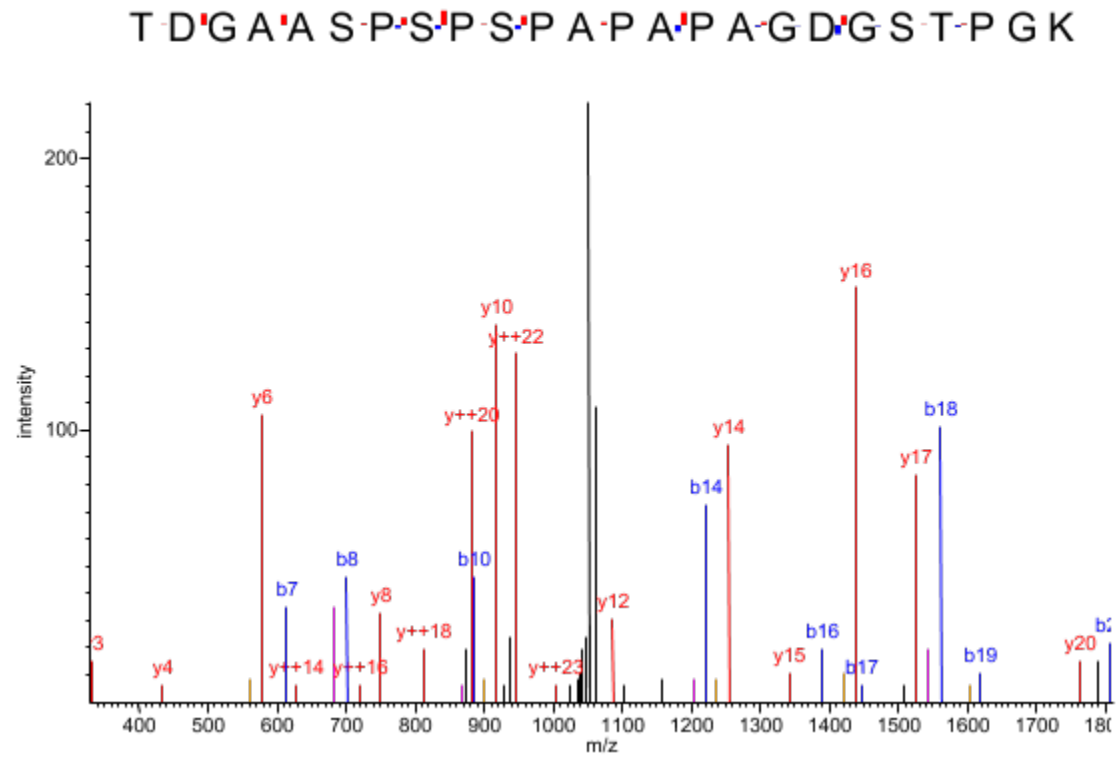

Peptide: LSEEATTTApSPSK

Protein: tr|B4FZG8|B4FZG8\_MAIZE; S395

e-value: 4.2E-7

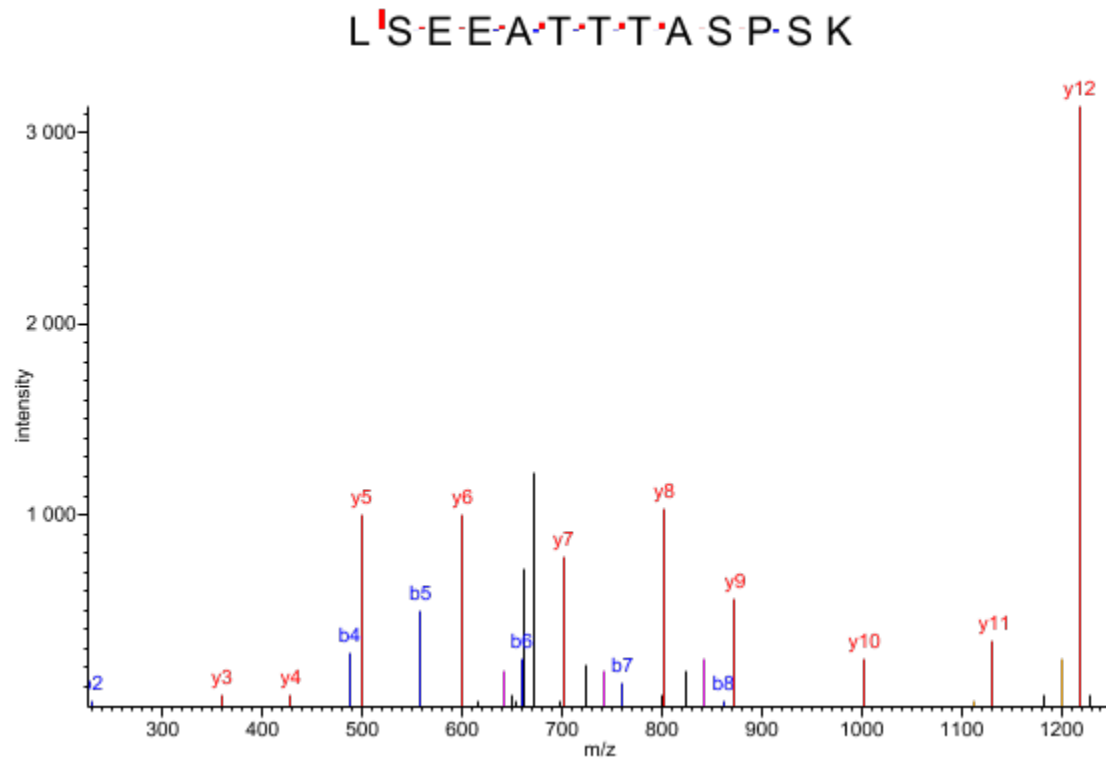

Peptide: DPHAVTSVpSPK  
Protein: GRMZM2G121840\_P01; S255  
e-value: 5.6E-5

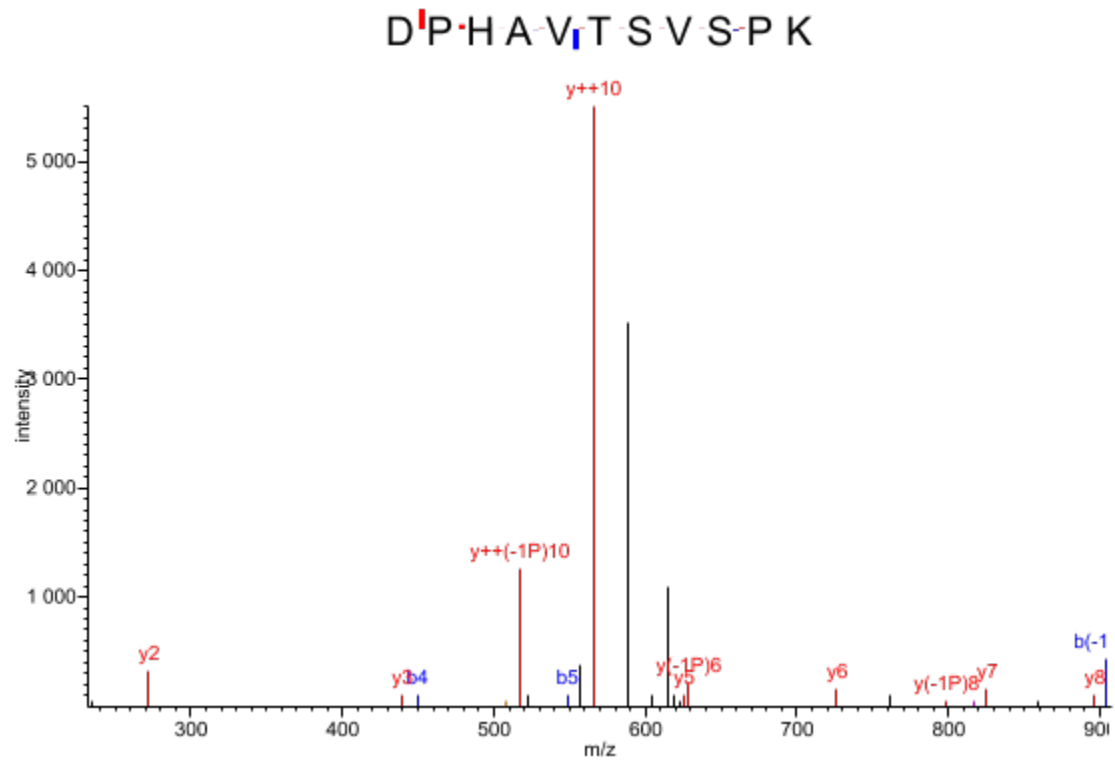

Peptide: EEVVAAGpSPGK  
Protein: GRMZM2G025592\_P01; S118  
e-value: 7.9E-11

E E V V A V A A G S P G K

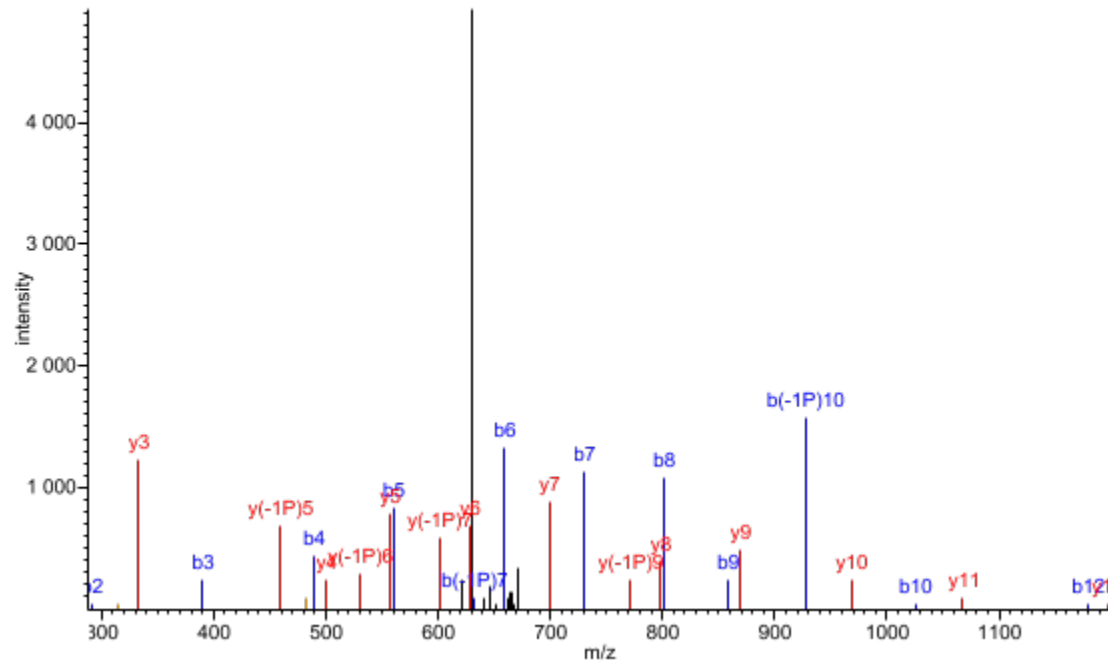

Peptide: APSpSPSPAAPTR  
Protein: GRMZM2G025592\_P01; S5  
e-value: 1.1E-4

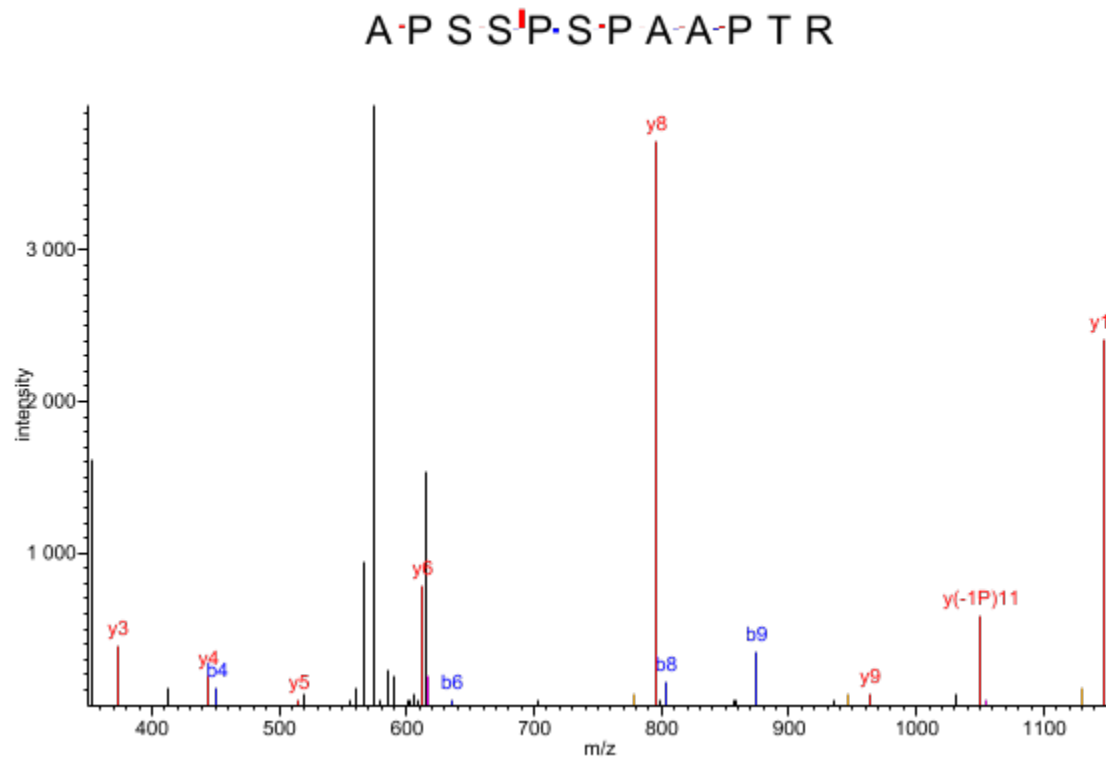

Peptide: EDTEAANEAGEDGAp(SEEKGT)DVEMK

Protein: GRMZM2G157470\_P01; S138/T144

e-value: 1E-8

E D T E A A N E A G E D G A S E E G K G T D V E M K

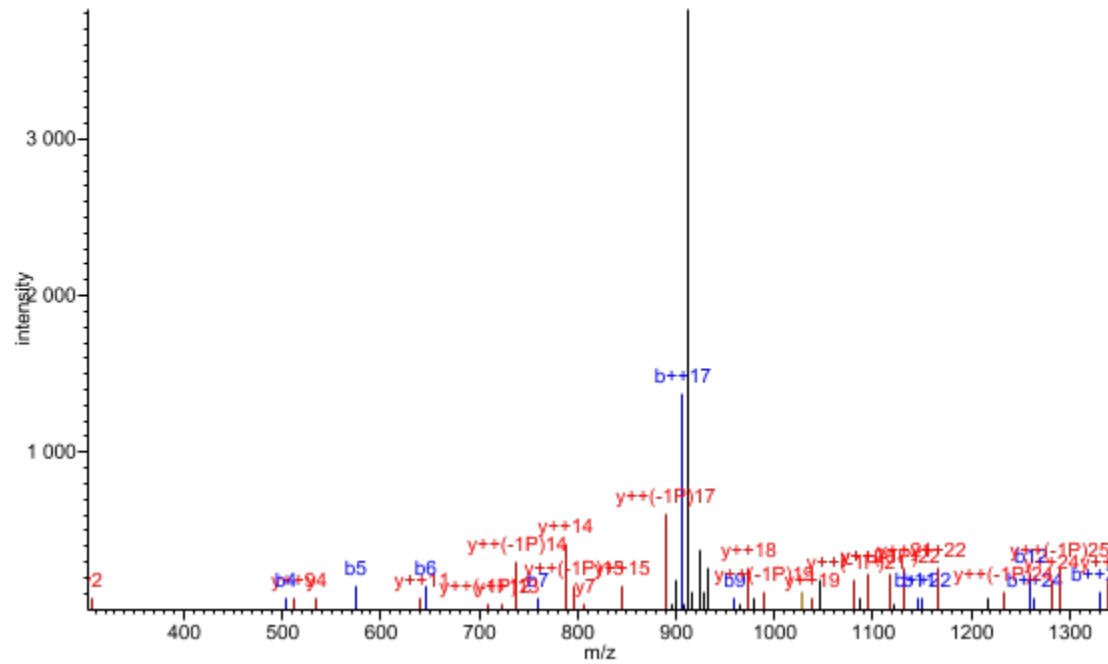



Peptide: GAENSGQPNTGSQEPK  
Protein: GRMZM2G157470\_P01; S341  
e-value: 1.7E-4

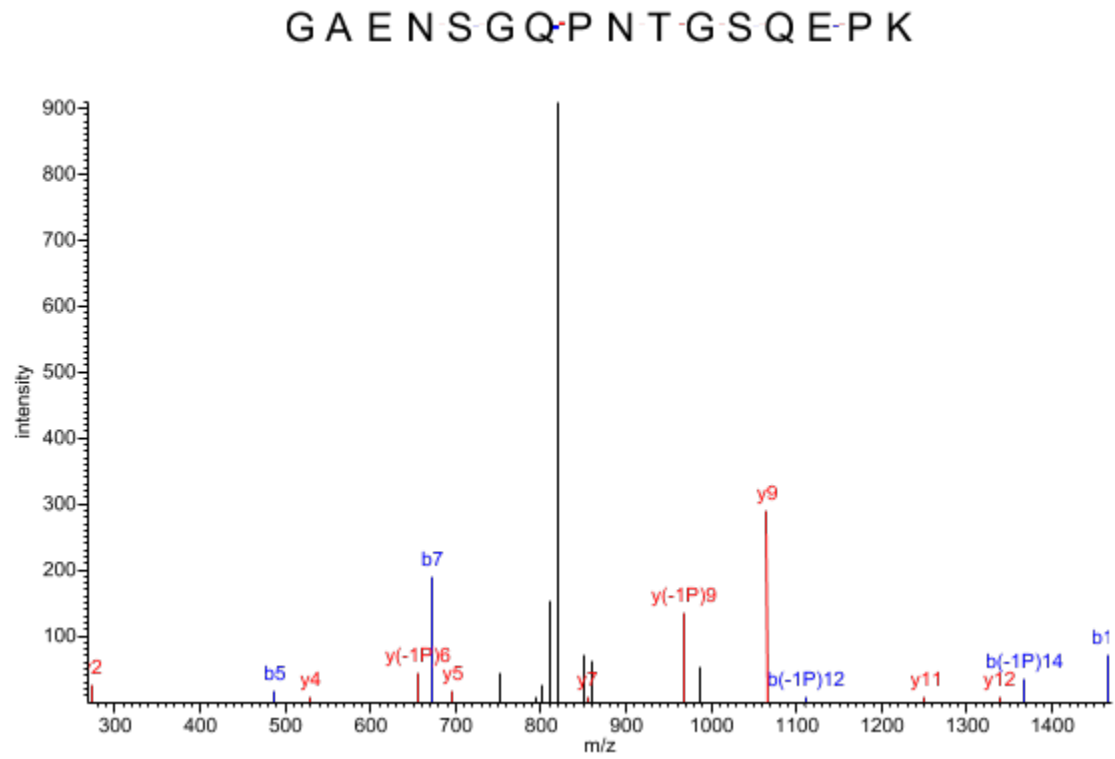

Peptide: pSDAEPAAVAAPETK

Protein: tr|B6TRL2|B6TRL2\_MAIZE; S252

e-value: 5.1E-10

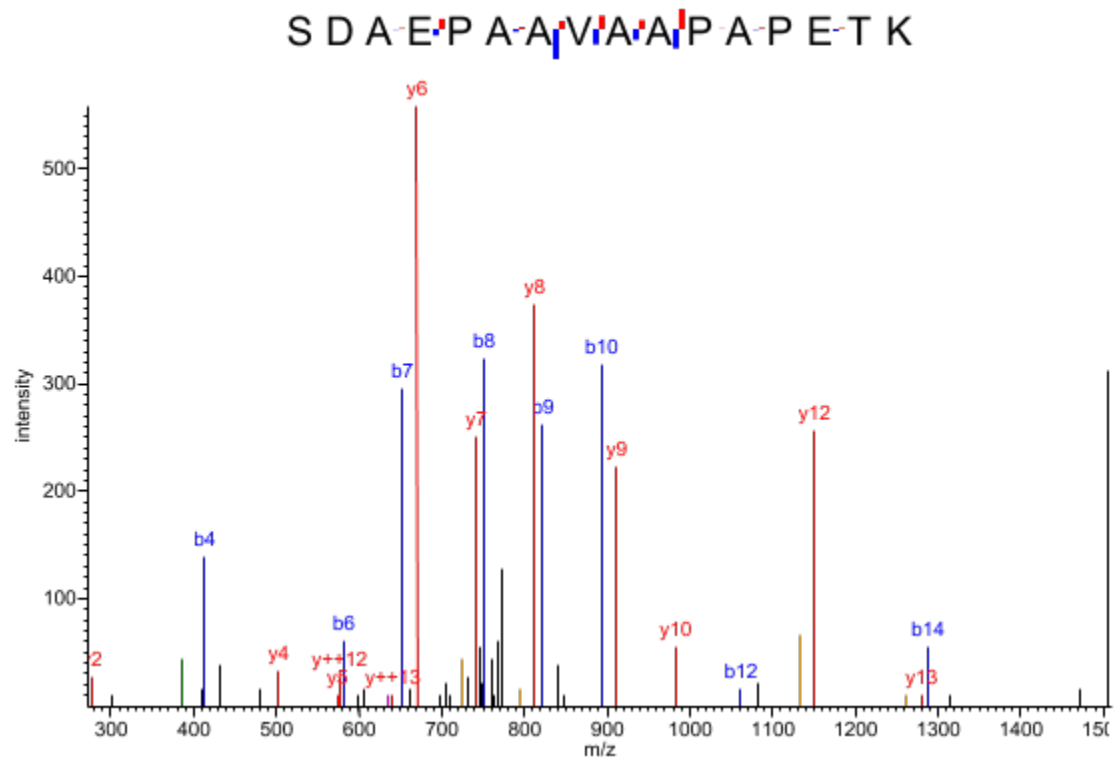

Peptide: pSDAEPAAADAAPVPEMK  
Protein: tr|B6TRL2|B6TRL2\_MAIZE; S332  
e-value: 8.2E-9

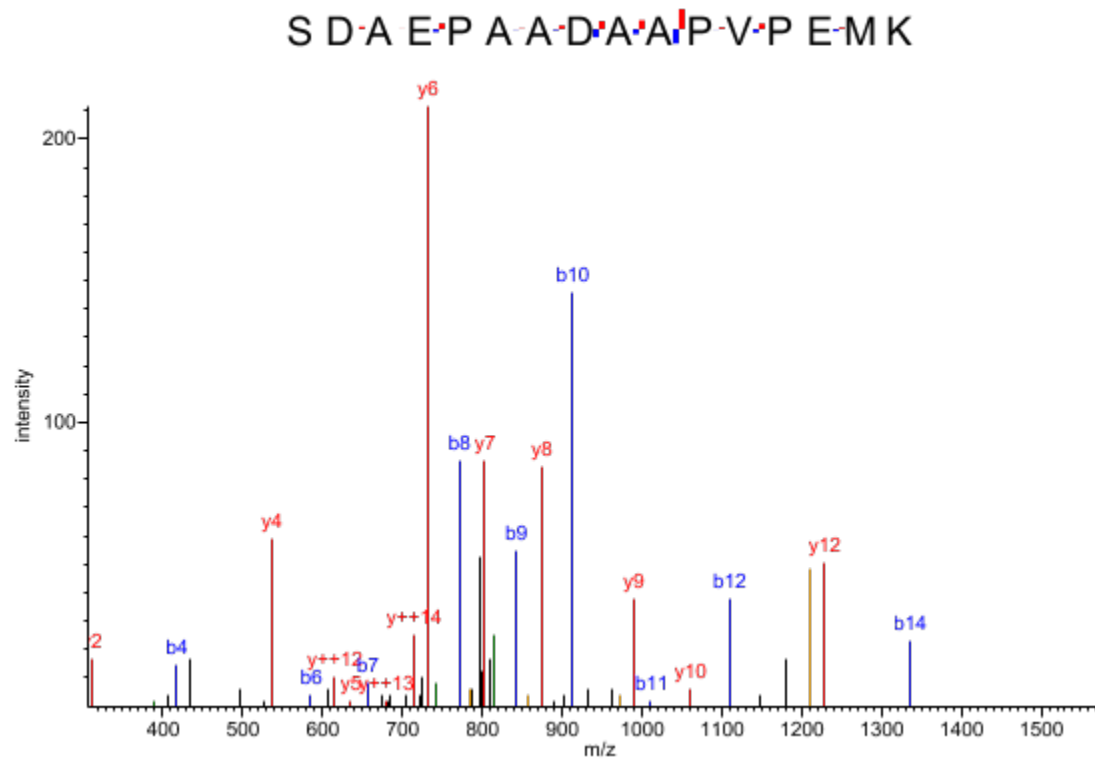

Peptide: pSDAEPAAVAAPVPETK

Protein: tr|B6TRL2|B6TRL2\_MAIZE; S300

e-value: 3E-10

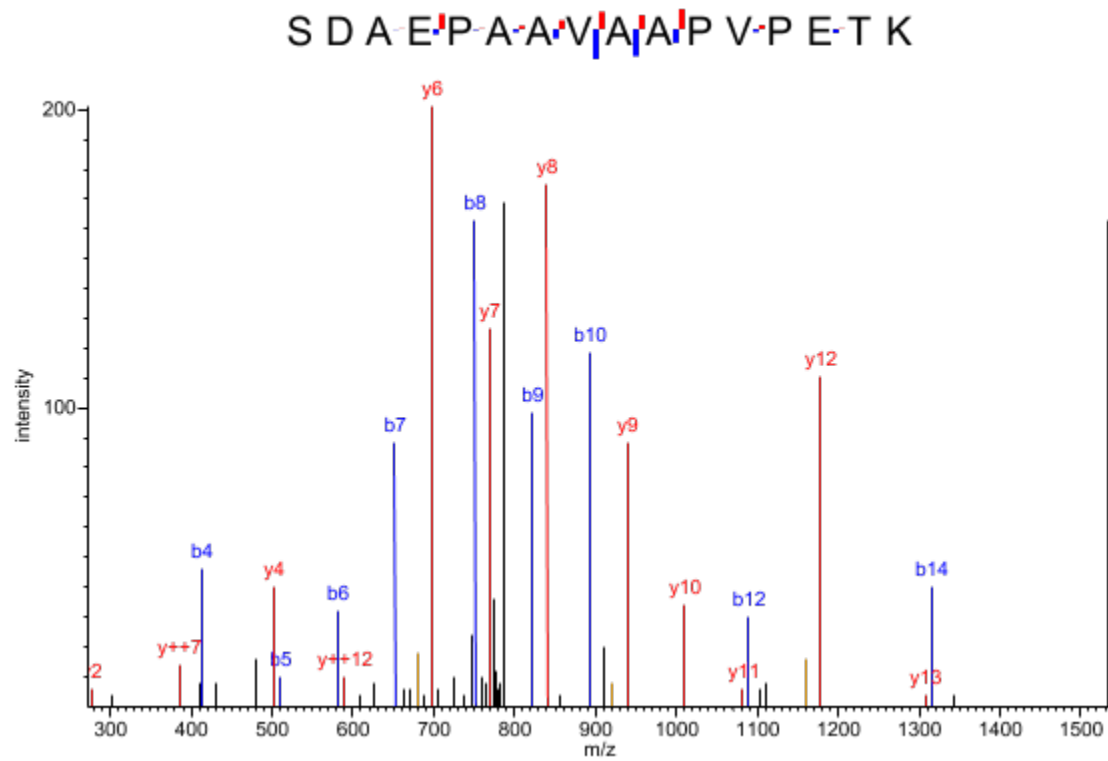

Peptide: SApSPDPELVr

Protein: tr|B7ZZV6|B7ZZV6\_MAIZE; S210

e-value: 9.3E-6

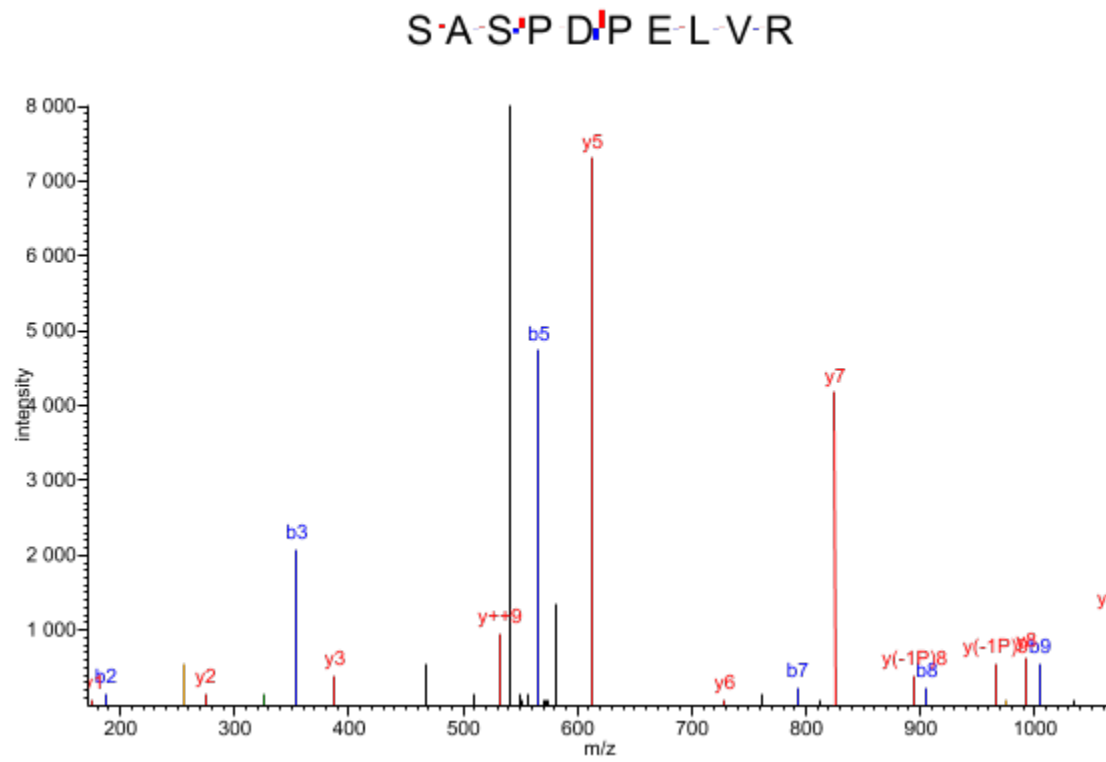

Peptide: Sp(SS)AIGESDDLVAALSGMNLSSR  
Protein: tr|B7ZZV6|B7ZZV6\_MAIZE; S249/S250  
e-value: 5.4E-21

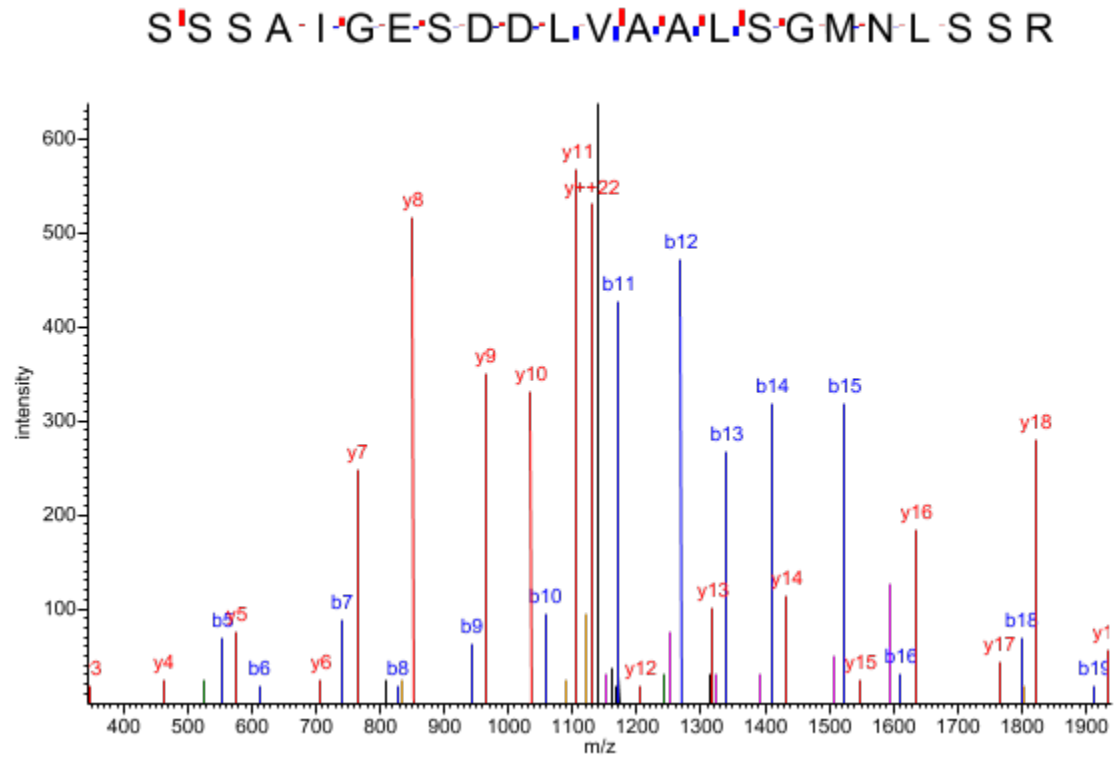

Peptide: p(SSS)AIGGSDDLVAALSGMNLSSR  
Protein: GRMZM2G012964\_P01; S245/S246/S247  
e-value: 1.5E-20

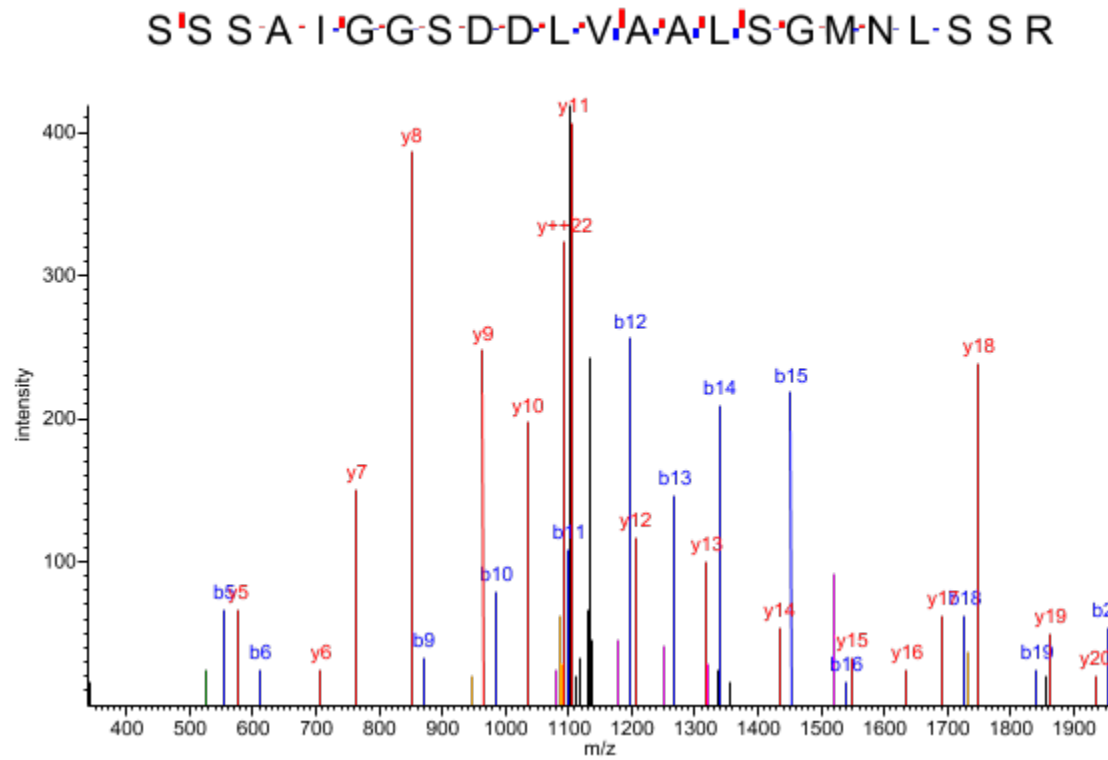

Peptide: SLDEIPNNDLPSNTFASLLGSpSLSR

Protein: GRMZM2G012964\_P01; S202

e-value: 9.6E-6

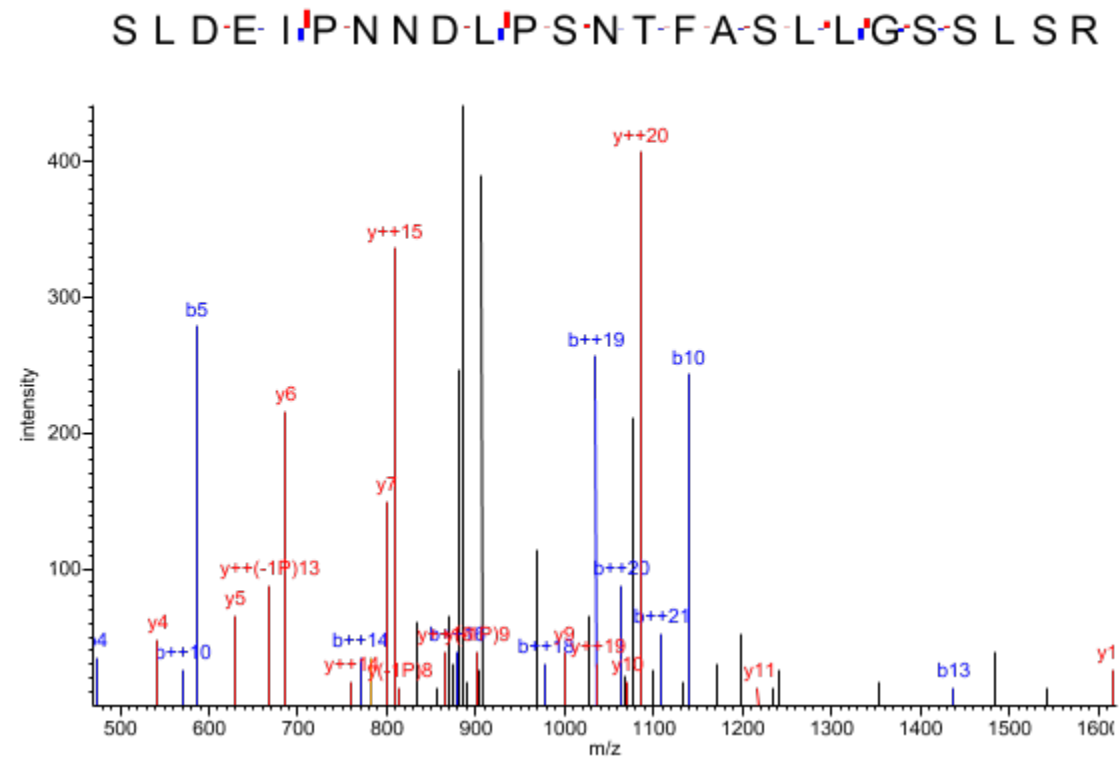



Peptide: SGp(SAPPT)VEGALGAAAAADLLVDDDLR

Protein: GRMZM2G012964\_P01; S31/T35

e-value: 1.9E-5

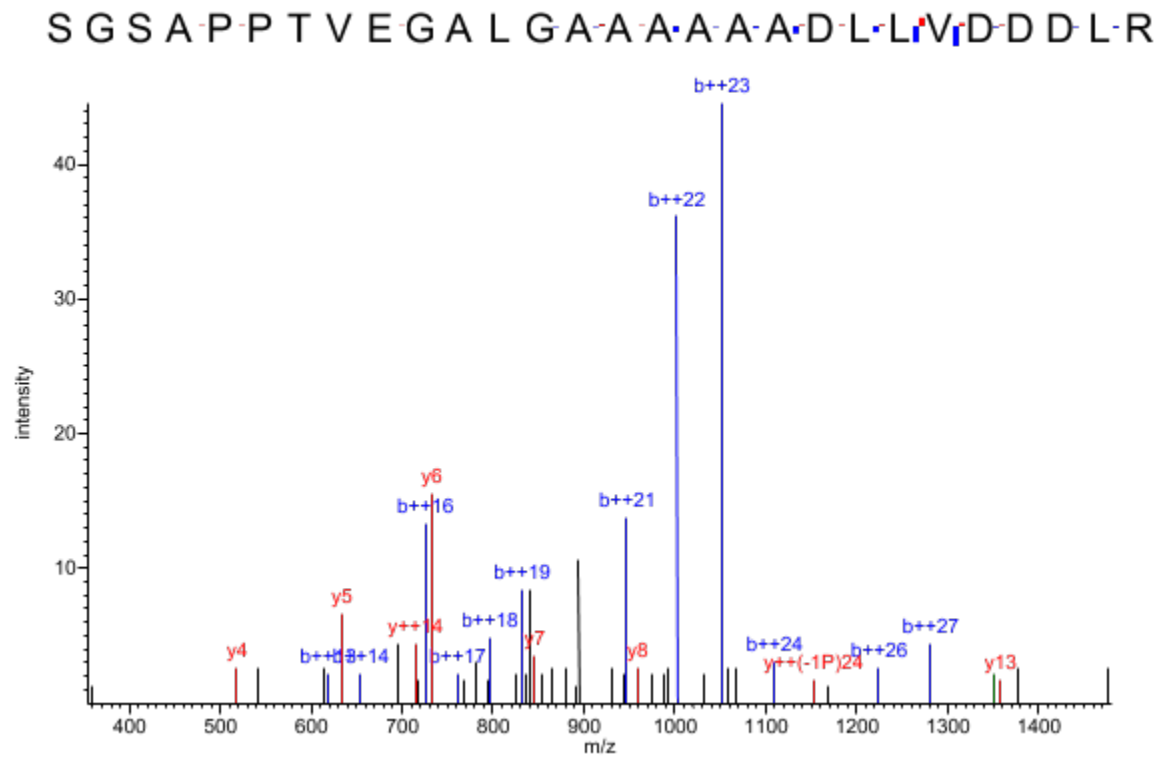

Peptide: AVAAPSKSpSPDSK  
Protein: GRMZM2G159032\_P04; S101  
e-value: 1.4E-10

A·V·A·A·P·S·K·S·S·P·D·S·K

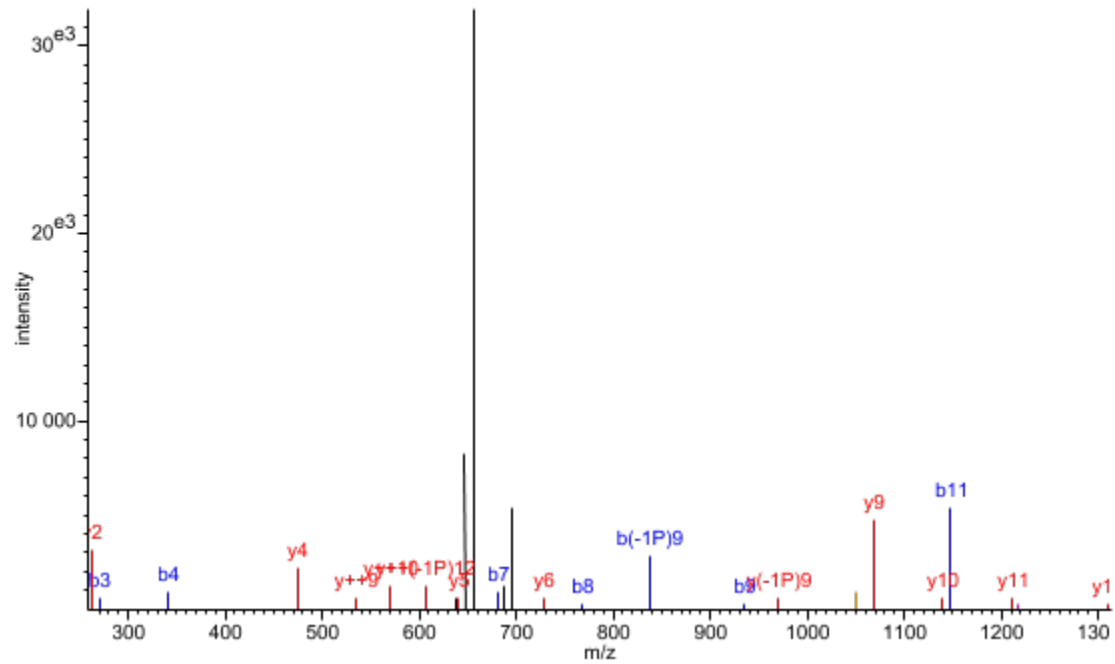

Peptide: VEQPIEGDEMDDLpSEDEEEEELNIPVIK

Protein: sp|Q9M4U5|HDT2\_MAIZE; S105

e-value: 9.7E-5

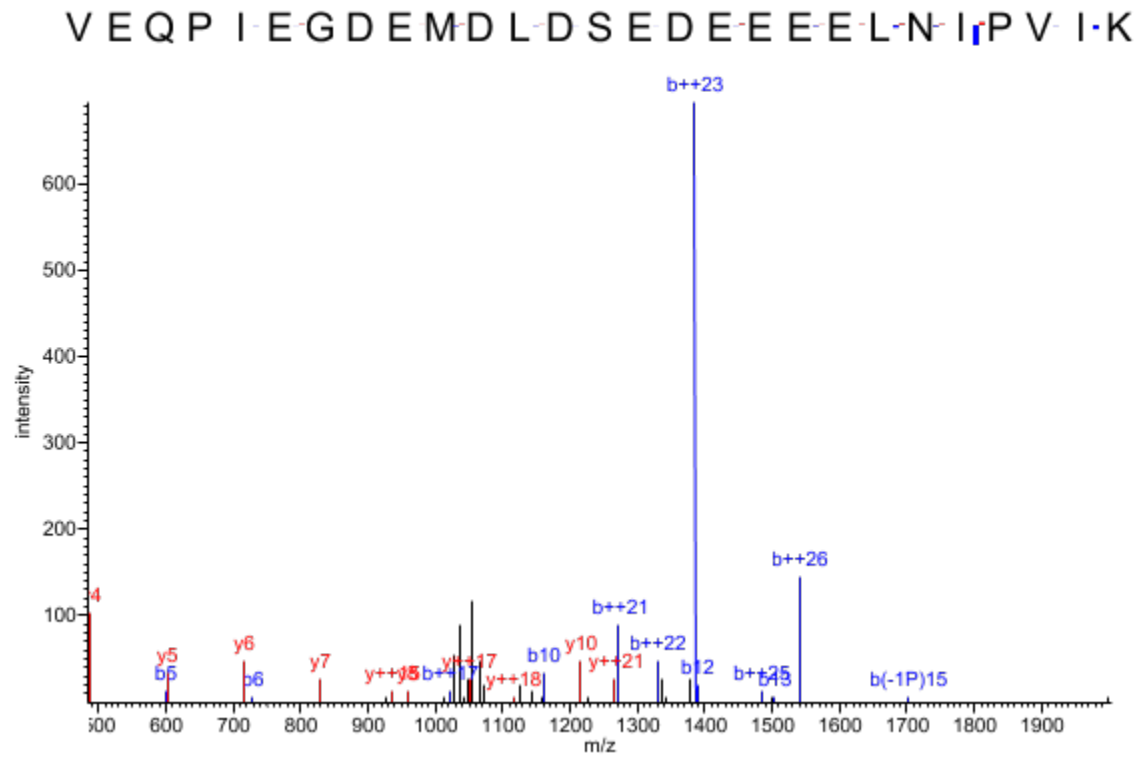

Peptide: SAPQGpSPGASSGSLATNIGSGAK

Protein: GRMZM2G443814\_P02; S373

e-value: 3E-12

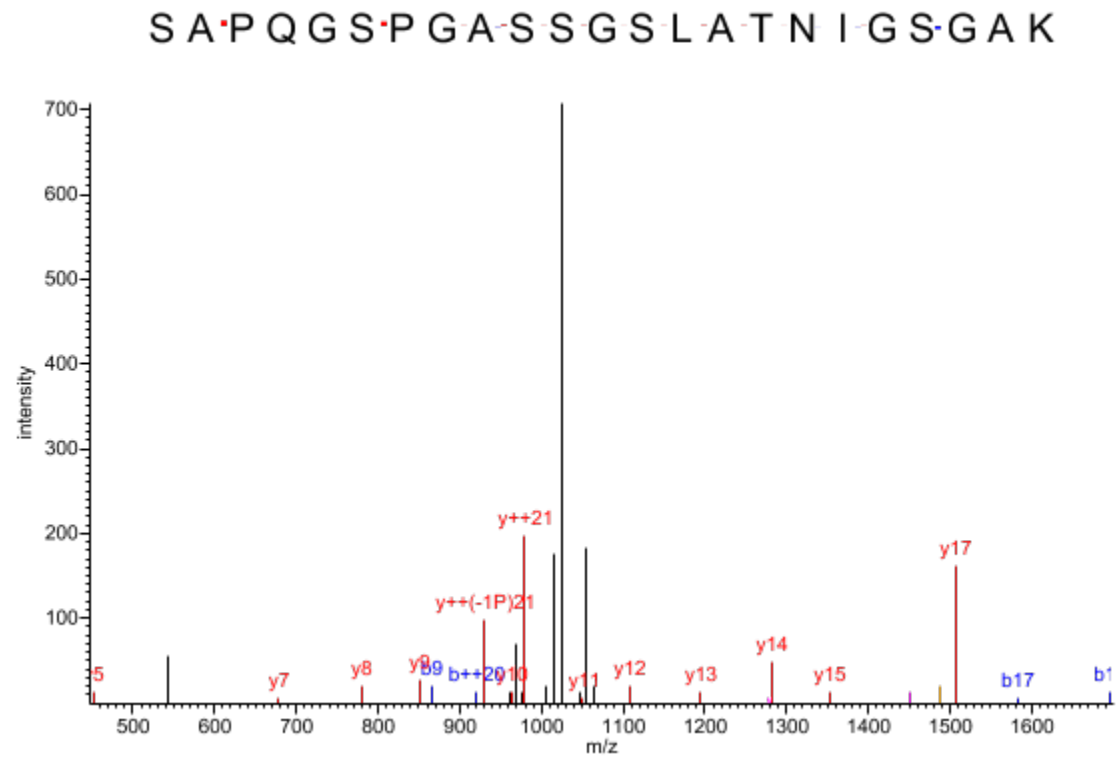

Peptide: TNPSQPSpSPTAK  
Protein: GRMZM2G334722\_P01; S56  
e-value: 2.1E-5

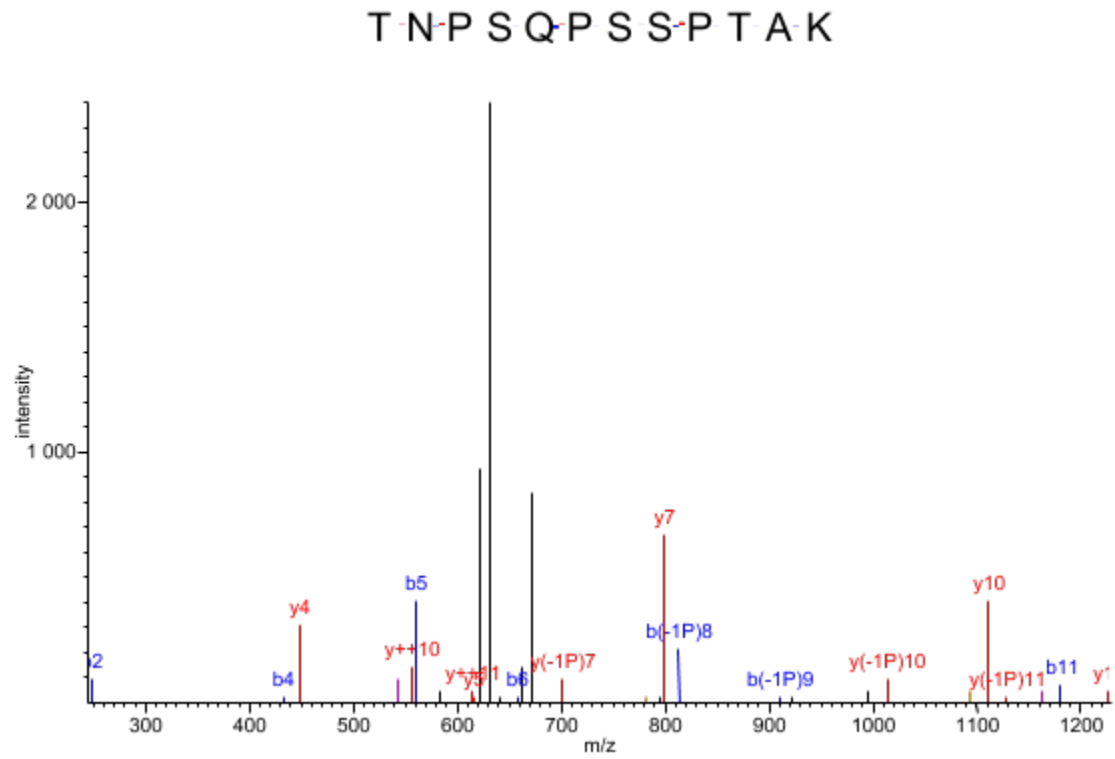

Peptide: SApSAGSFDDPSVTGGR  
Protein: GRMZM2G704338\_P02; S744  
e-value: 1.3E-11

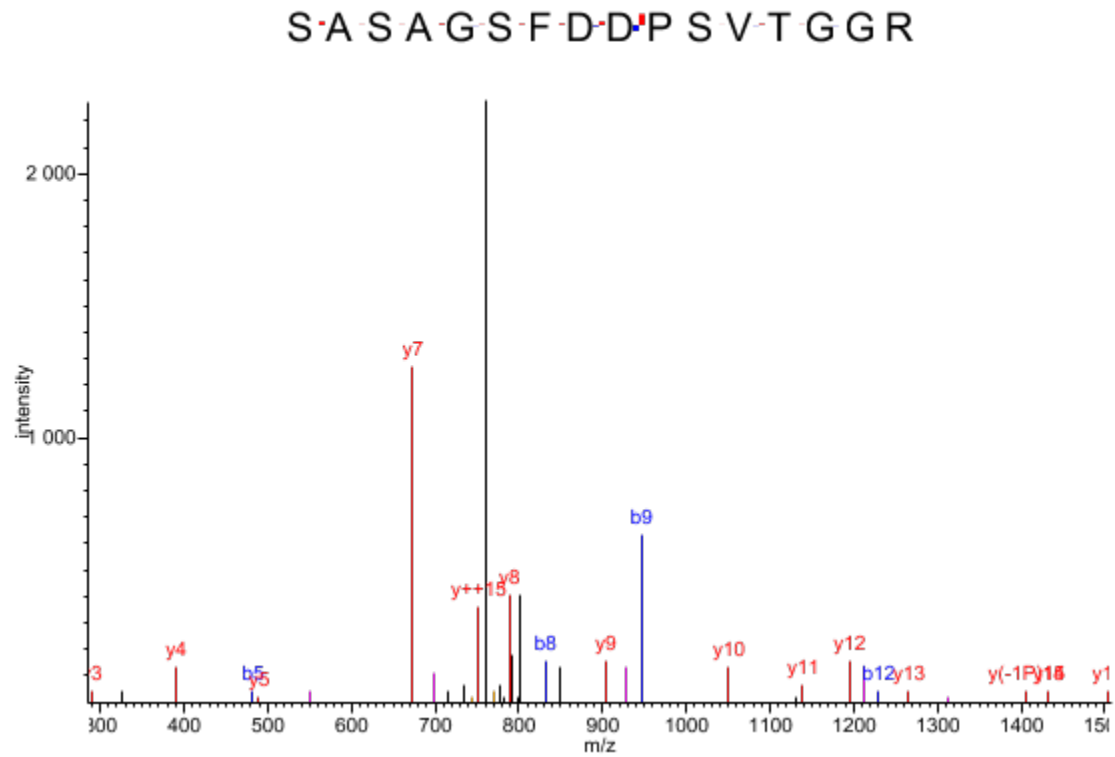

Peptide: GAApSGDPSSEVNR  
Protein: GRMZM2G010075\_P02; S124  
e-value: 4.5E-4

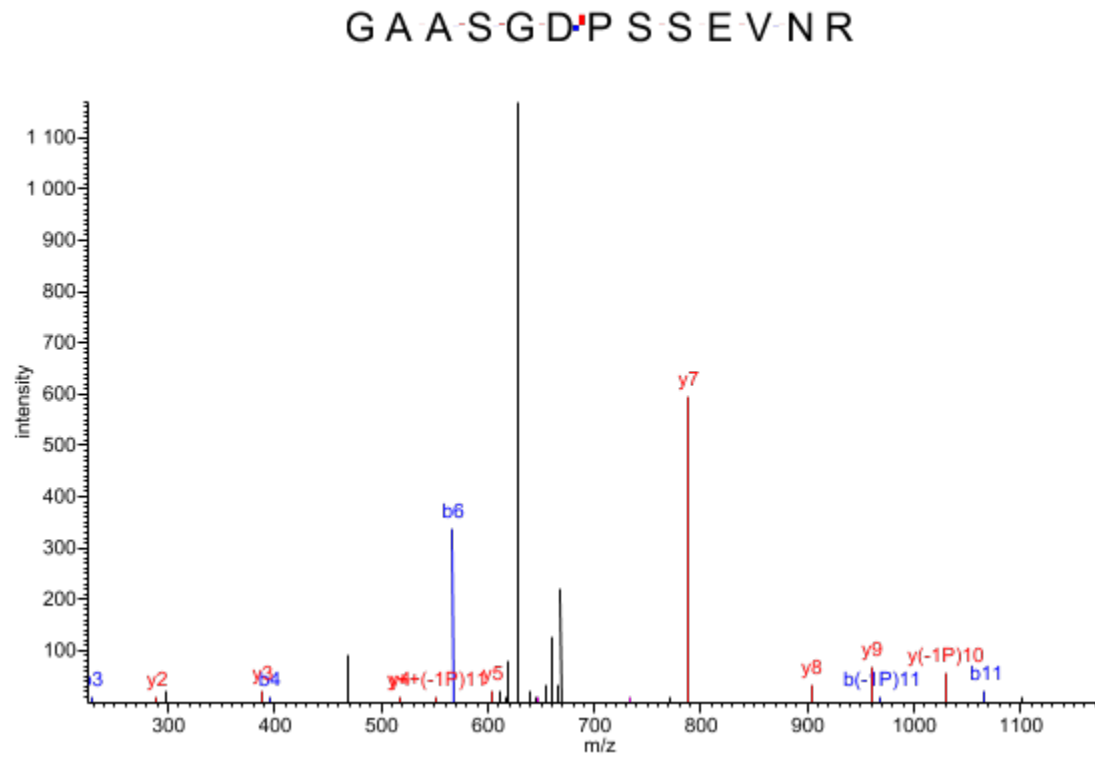

Peptide: MTEADVgSTEVK  
Protein: GRMZM2G375984\_P01; S115  
e-value: 2.6E-5

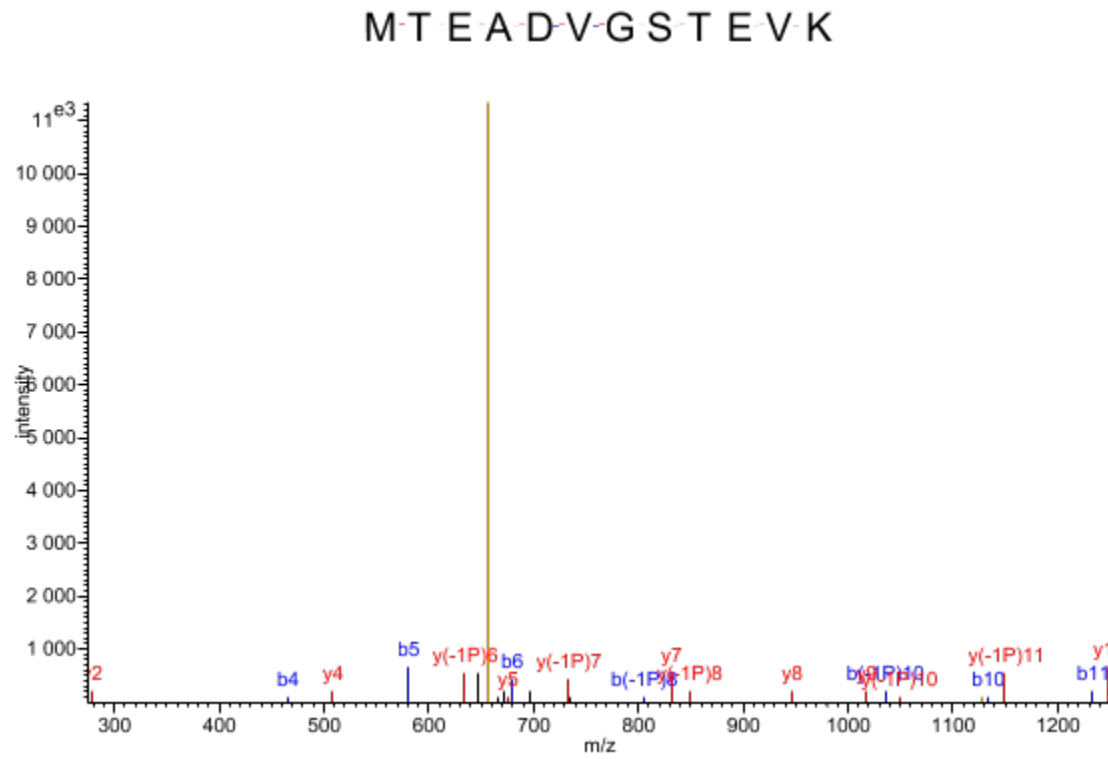



Peptide: YGVAEAIGSNpSKR  
Protein: GRMZM2G016939\_P03; S665  
e-value: 2.7E-7

Y·G·V·A·E·A·I·G·S·N·S·K·R

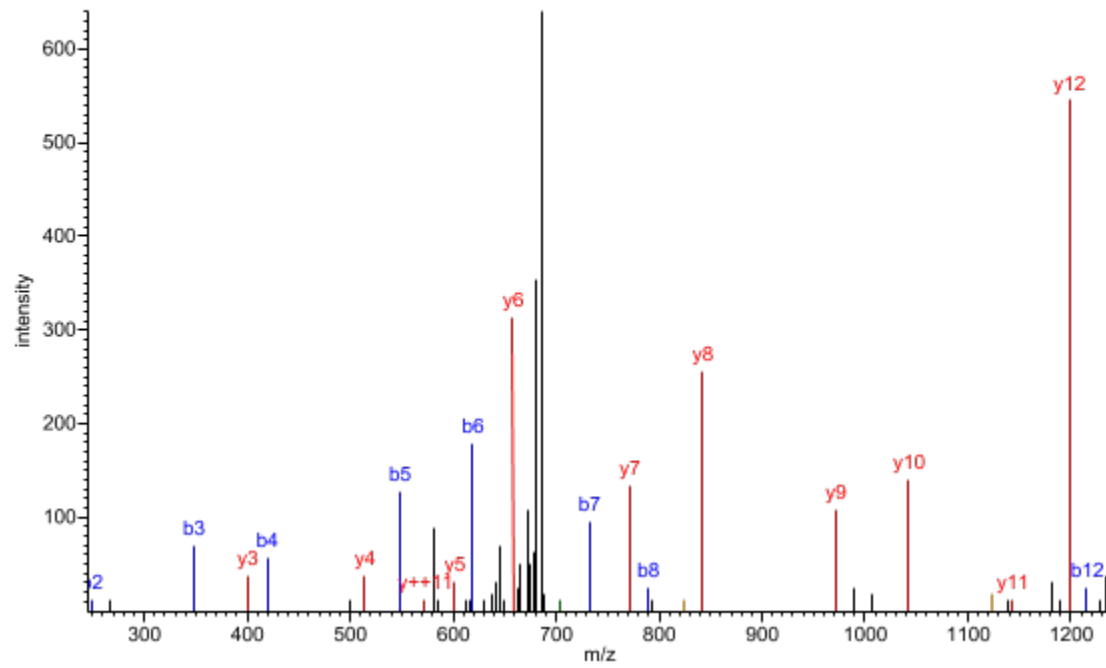

Peptide: TTpSLPTETEEER

Protein: sp|B6TNQ7|U7376\_MAIZE; S83

e-value: 6.5E-9

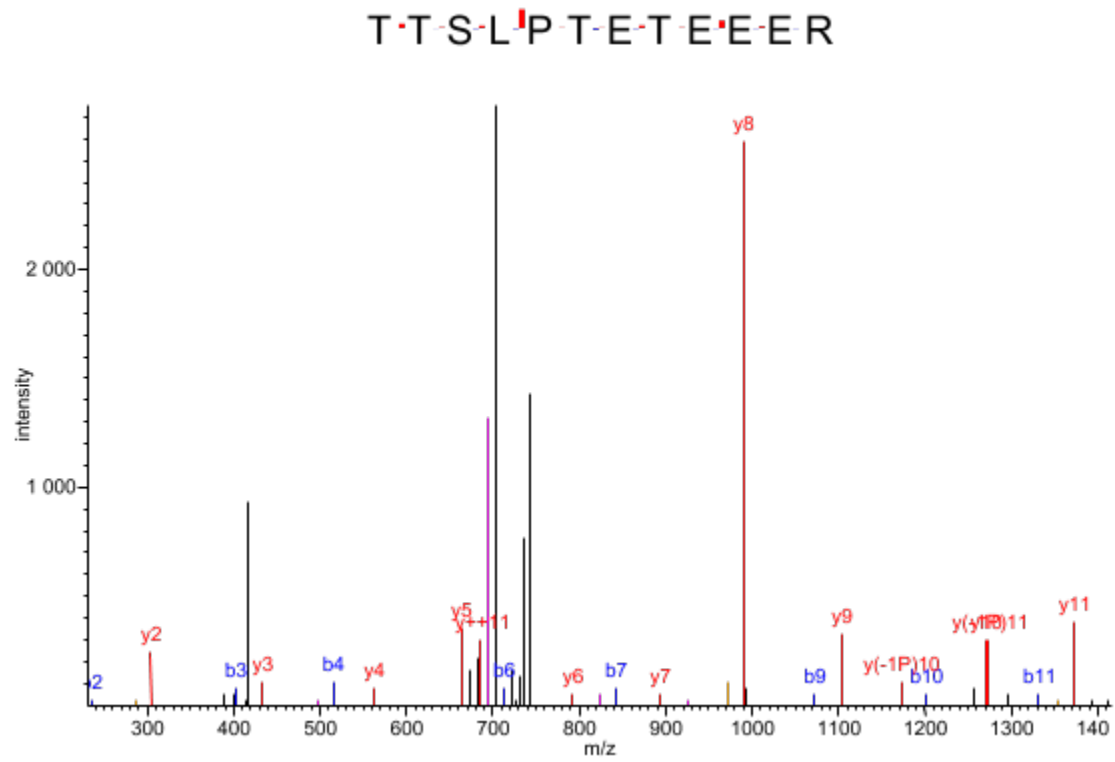

Peptide: TSpSLPAEYMEDR  
Protein: GRMZM2G438290\_P01; S105  
e-value: 4.8E-10

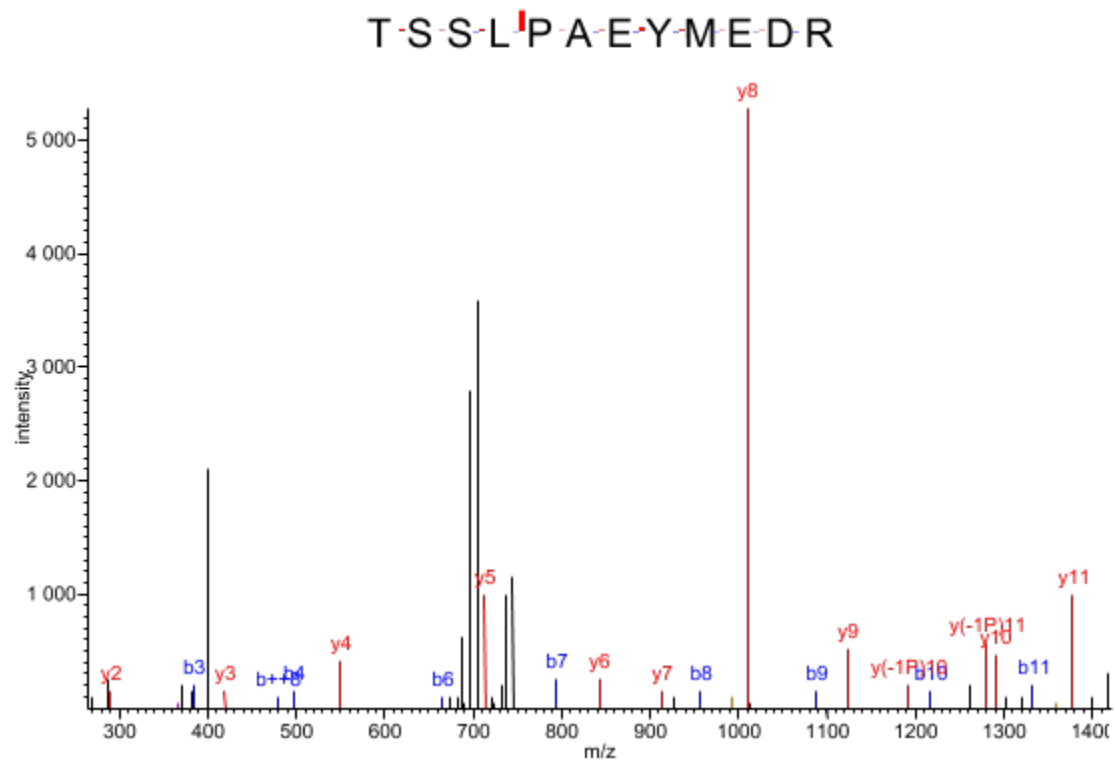

Peptide: CESSpSFLPpSFSIVPSLSLSLPR  
Protein: GRMZM2G334165\_P03; S157, S161  
e-value: 2.9E-3

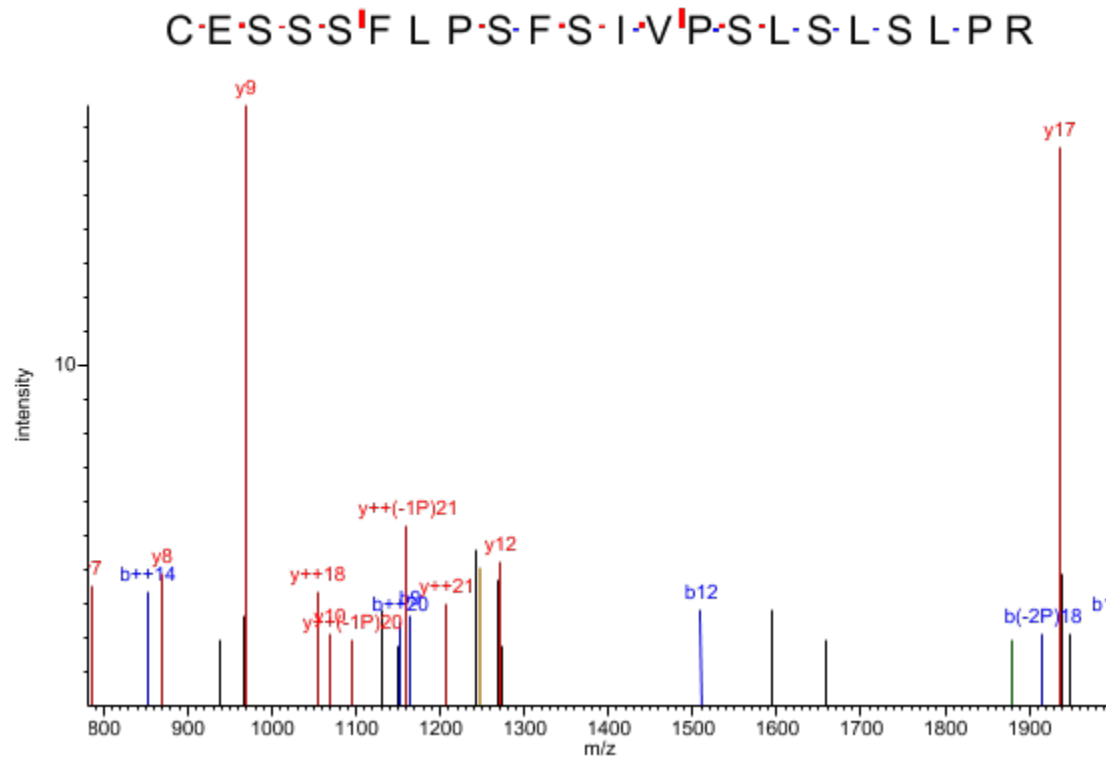

Peptide: GVpSAWNFDIEDLK  
Protein: GRMZM2G413544\_P01; S351  
e-value: 5.2E-12

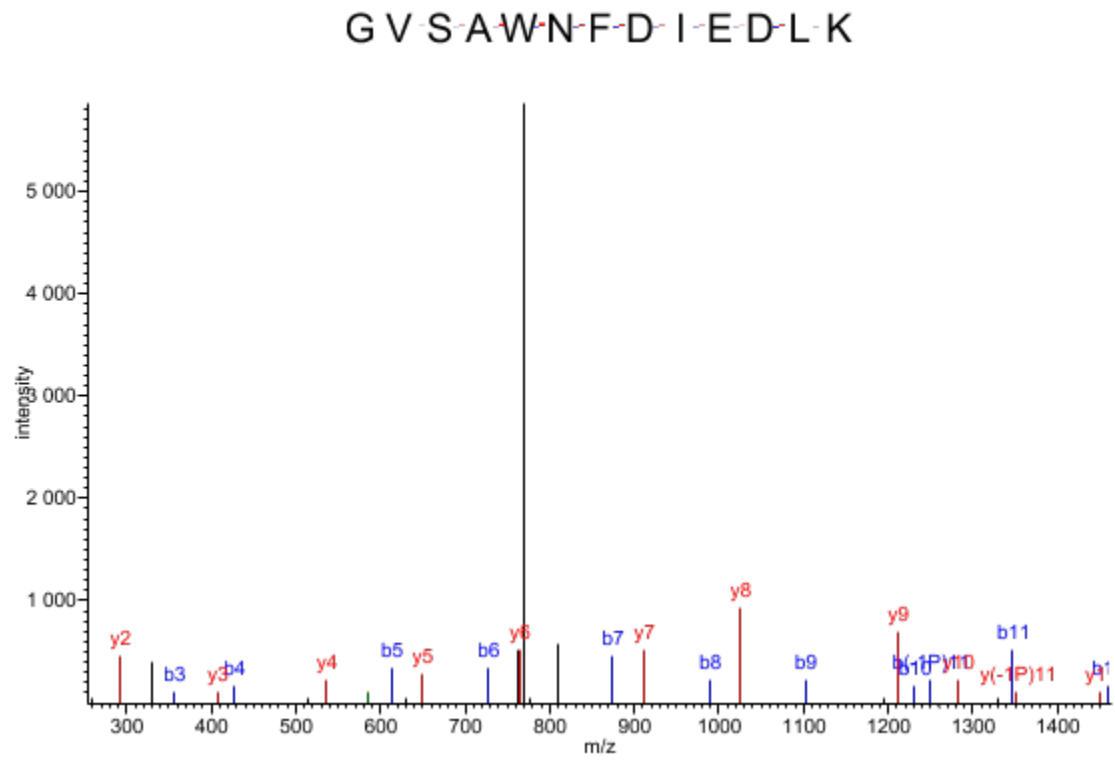

Peptide: SSVLHpSQPK

Protein: tr|B6T6P6|B6T6P6\_MAIZE; S173

e-value: 1.2E-4

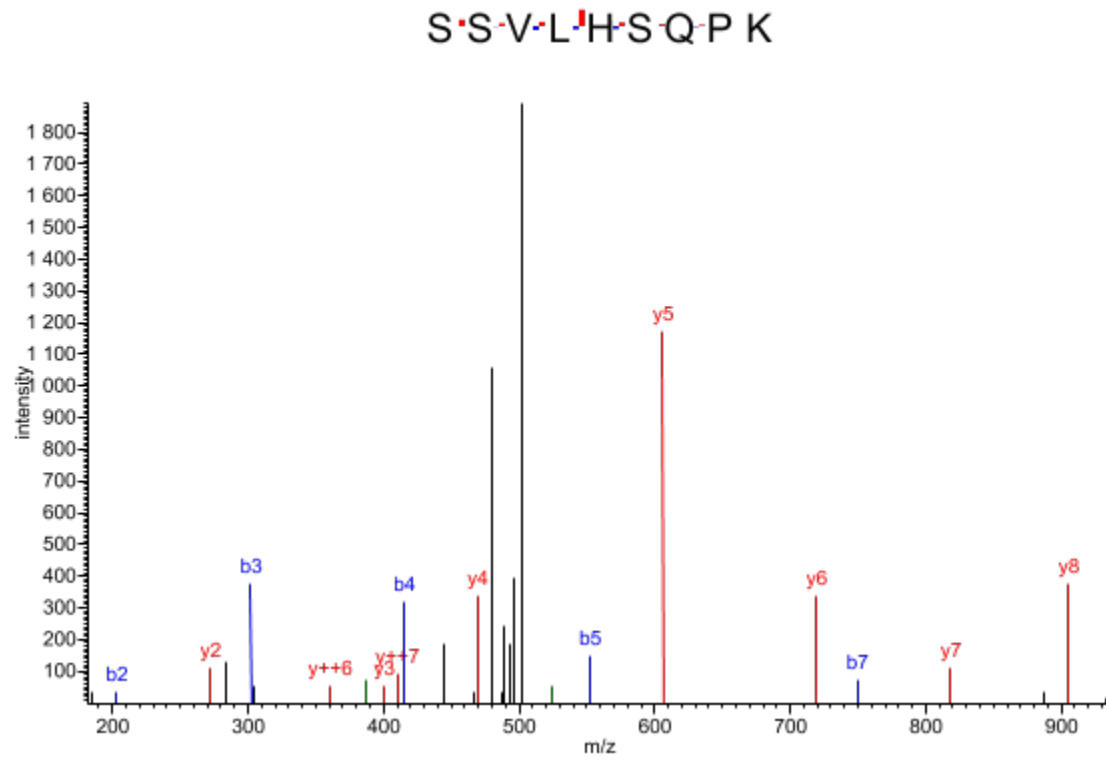

Peptide: MDDDIVSTGIDEGSESpSGSGTGDR

Protein: GRMZM2G702514\_P01; S17

e-value: 9.3E-3

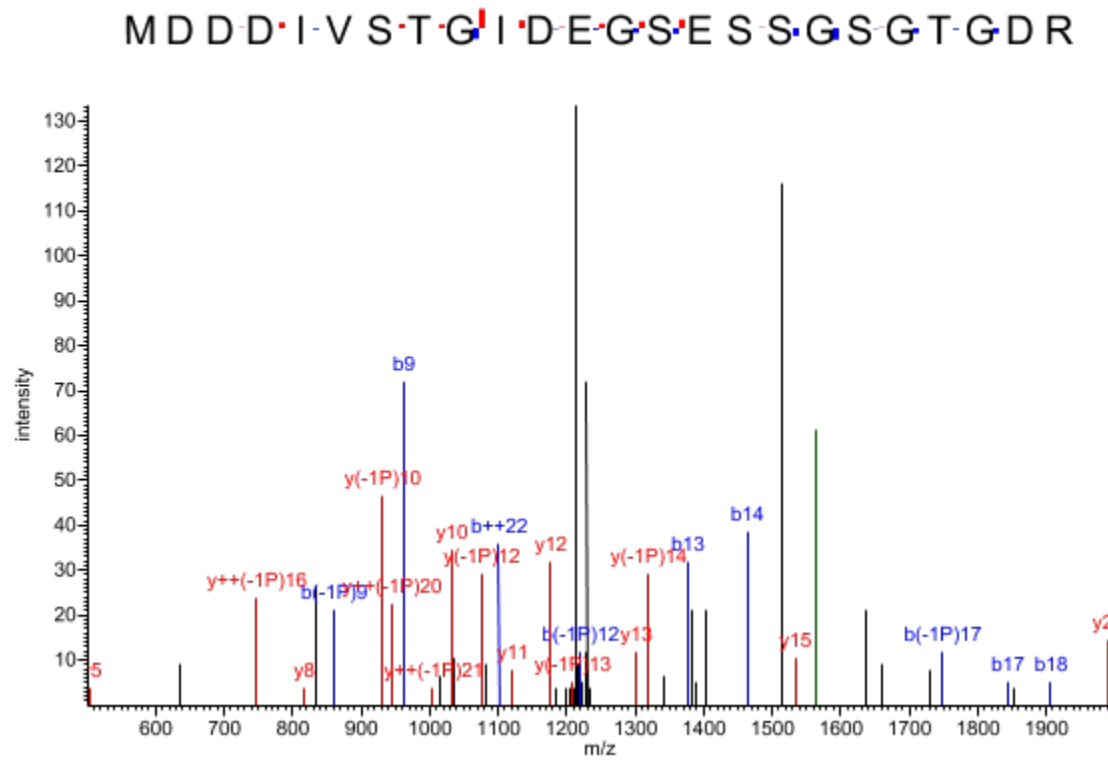

Peptide: NLSYSYpSTGADGR  
Protein: GRMZM2G125424\_P01; S382  
e-value: 1.4E-6

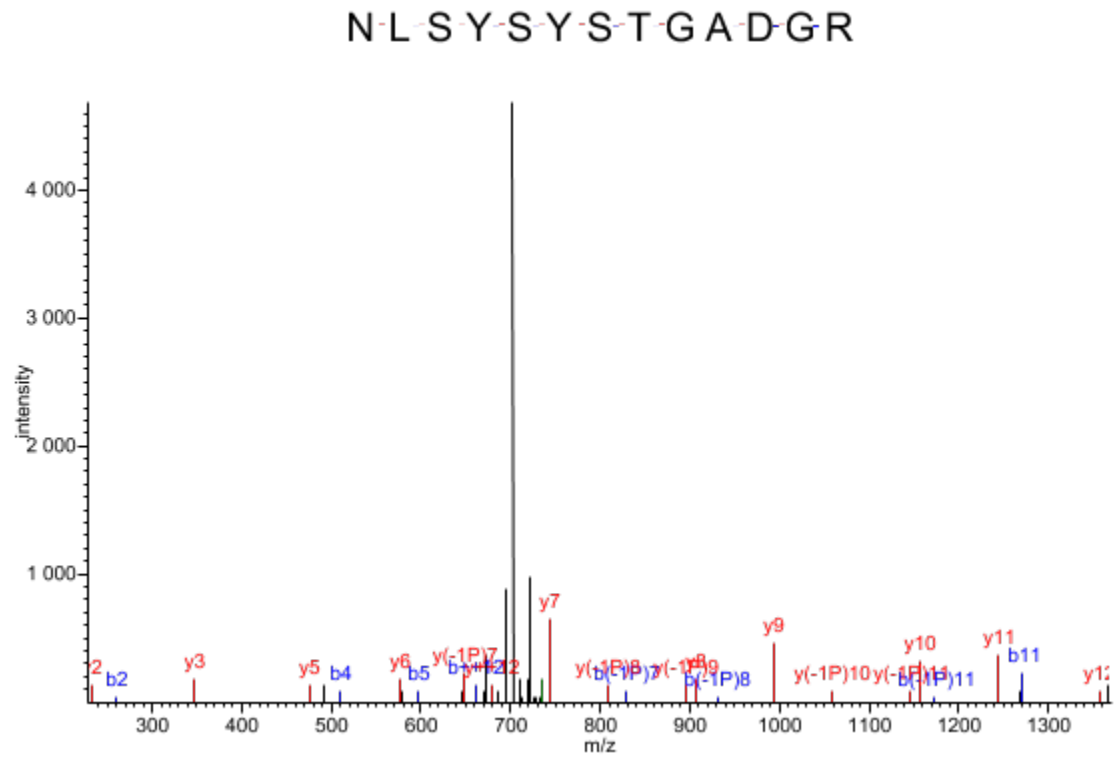



Peptide: NLSYQYpSTGADGR

Protein: GRMZM2G085236\_P02; S541

e-value: 7.4E-6

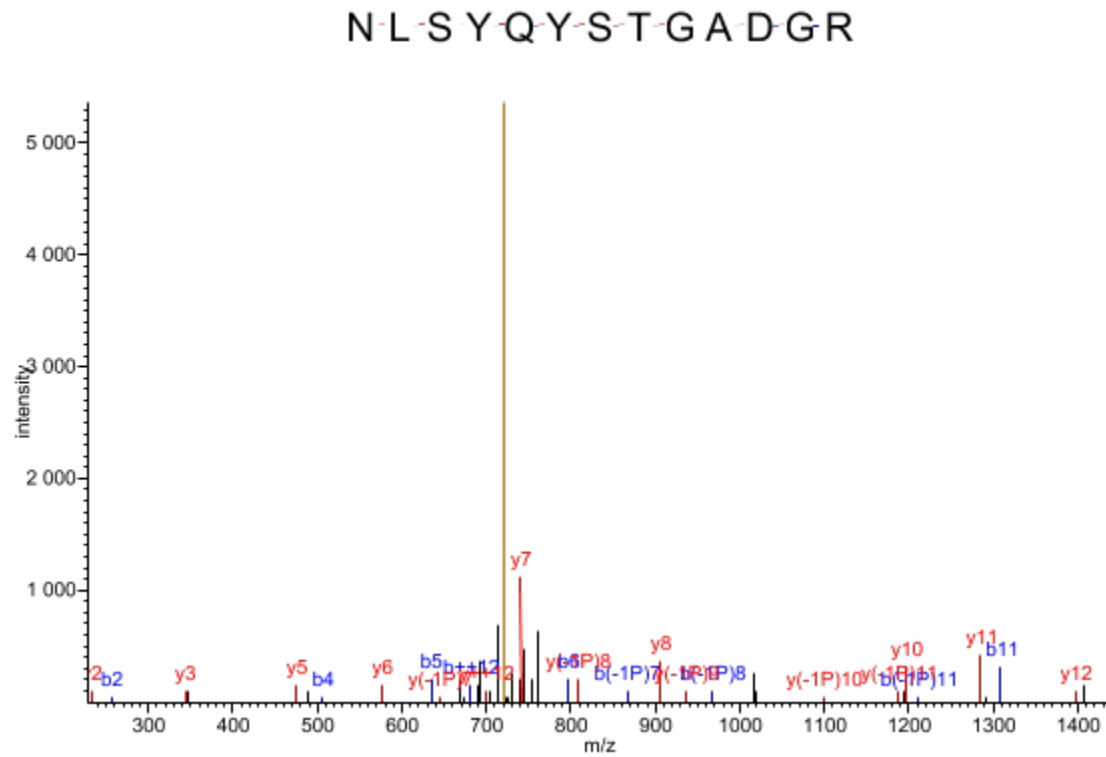

Peptide: DAAAGpSDTGEELVK  
Protein: GRMZM2G066274\_P01; S753  
e-value: 6.3E-7

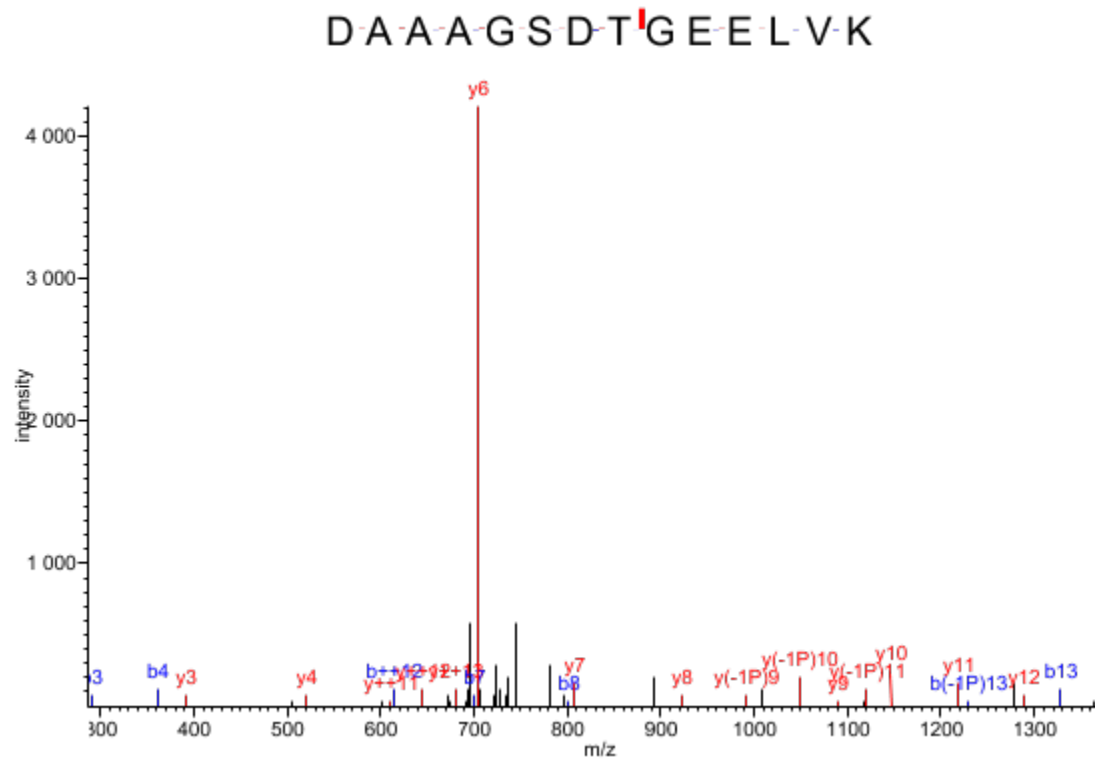

Peptide: TGpSLTAEEAEDNR

Protein: tr|B6SQ98|B6SQ98\_MAIZE; S5

e-value: 9.3E-12

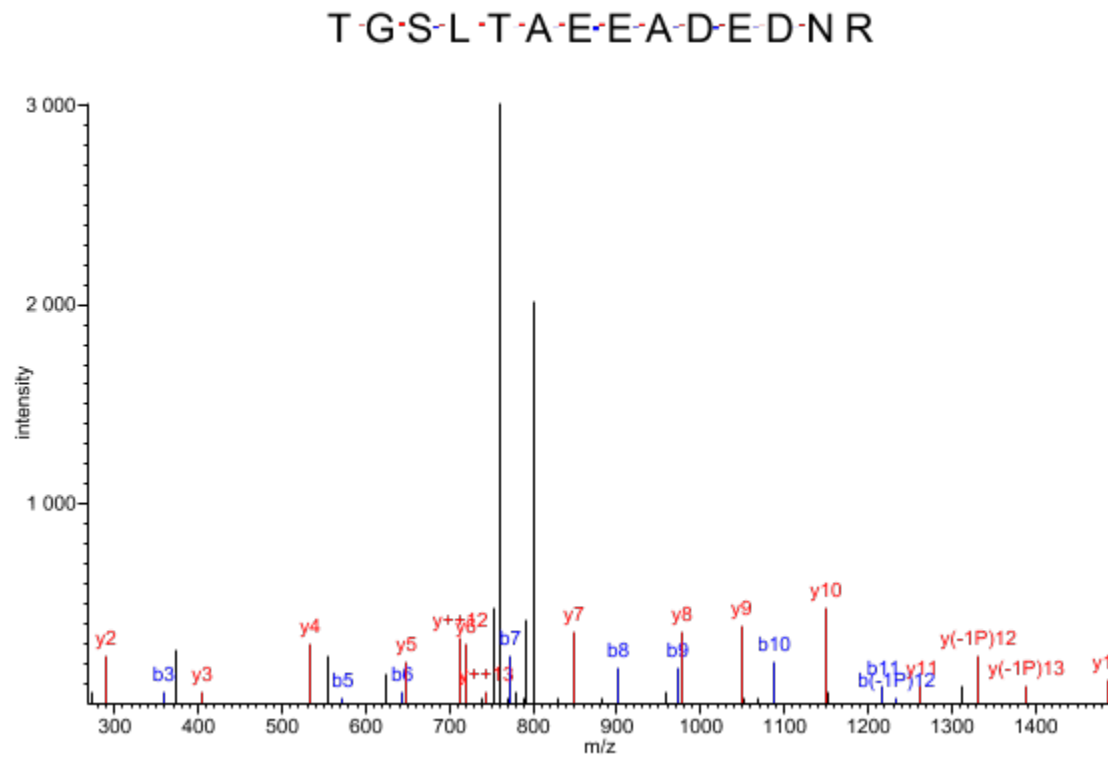

Peptide: pSAVGTPAYIAPEVLSR  
Protein: GRMZM2G110922\_P04; S158  
e-value: 2.2E-10

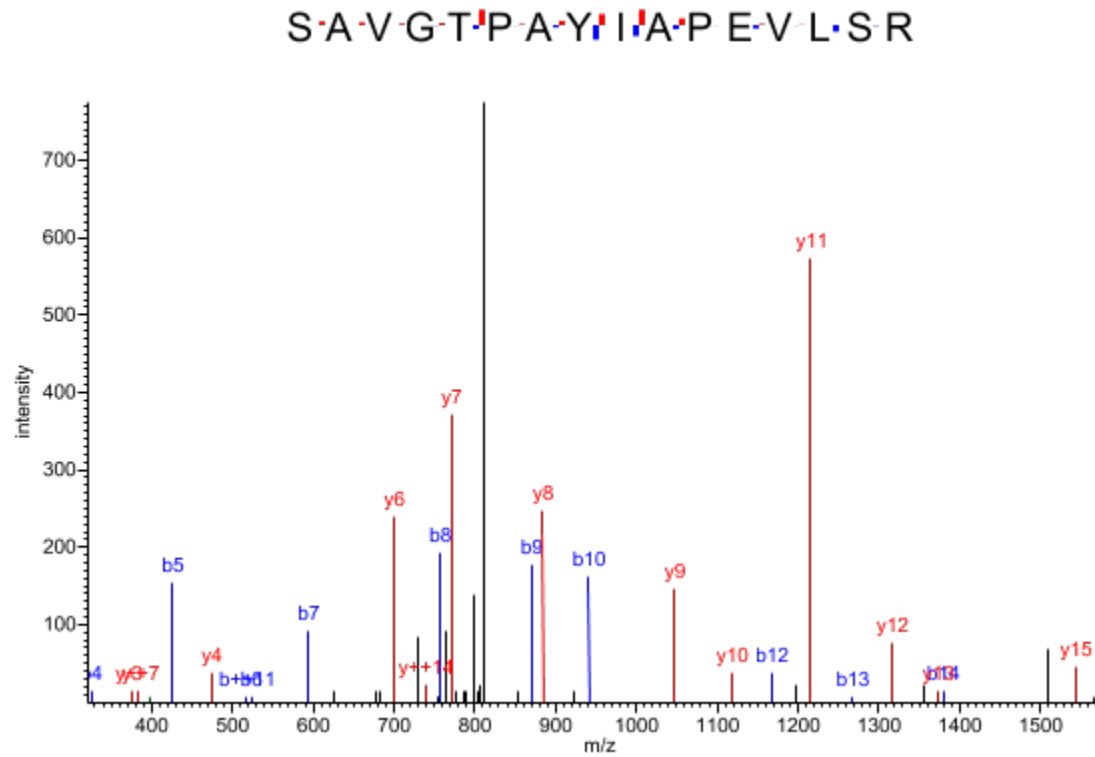

Peptide: SDMPQpSPK

Protein: tr|B4FI84|B4FI84\_MAIZE; S204

e-value: 2E-4

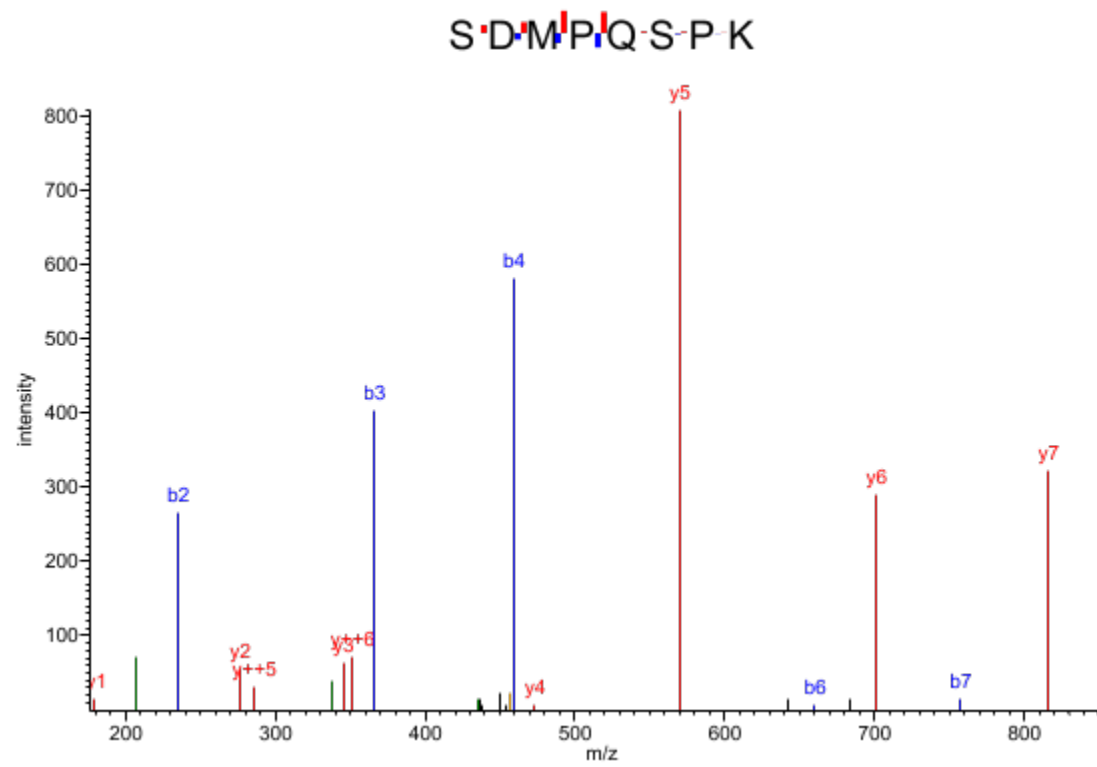

Peptide: A Q S G V M p T A E T G T Y R  
Protein: GRMZM2G451132\_P01; T433  
e-value: 5.4E-10

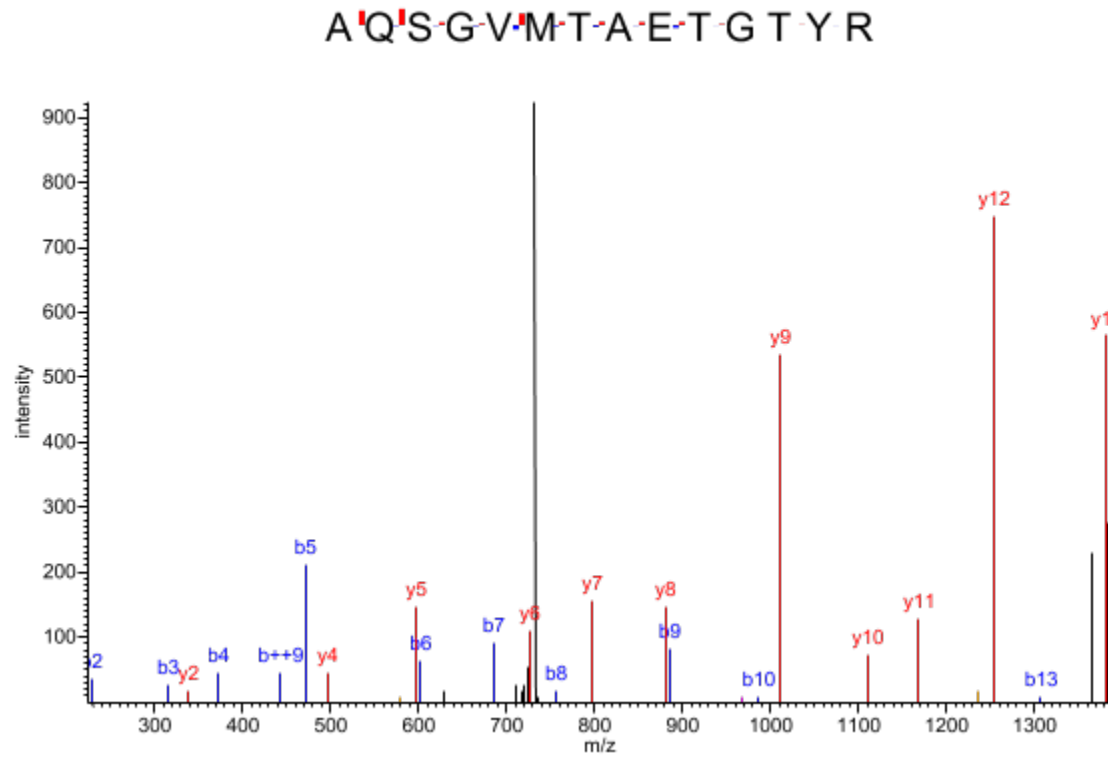

Peptide: SLDQQpSYQDAQTEASVK  
Protein: GRMZM2G011070\_P01; S431  
e-value: 3.7E-16

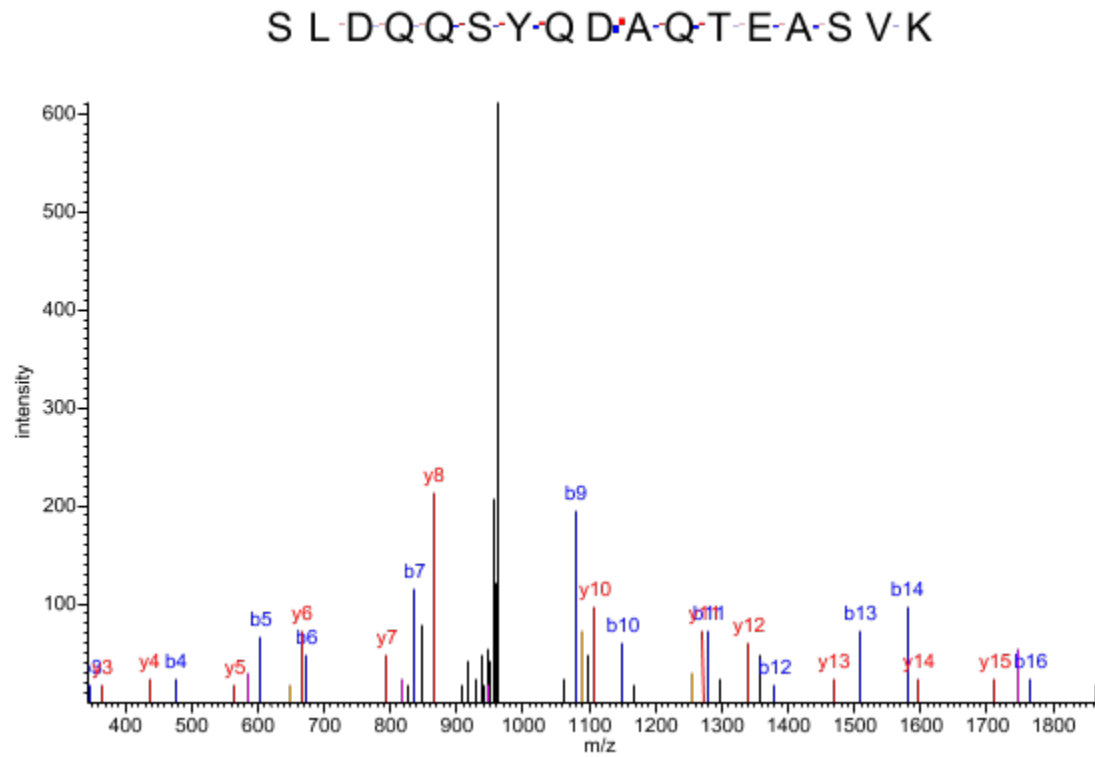

Peptide: HAp(SFS)PSSAAPSPTAEGAAPPAVTR

Protein: GRMZM2G099049\_P02; S29/S31

e-value: 8.8E-12

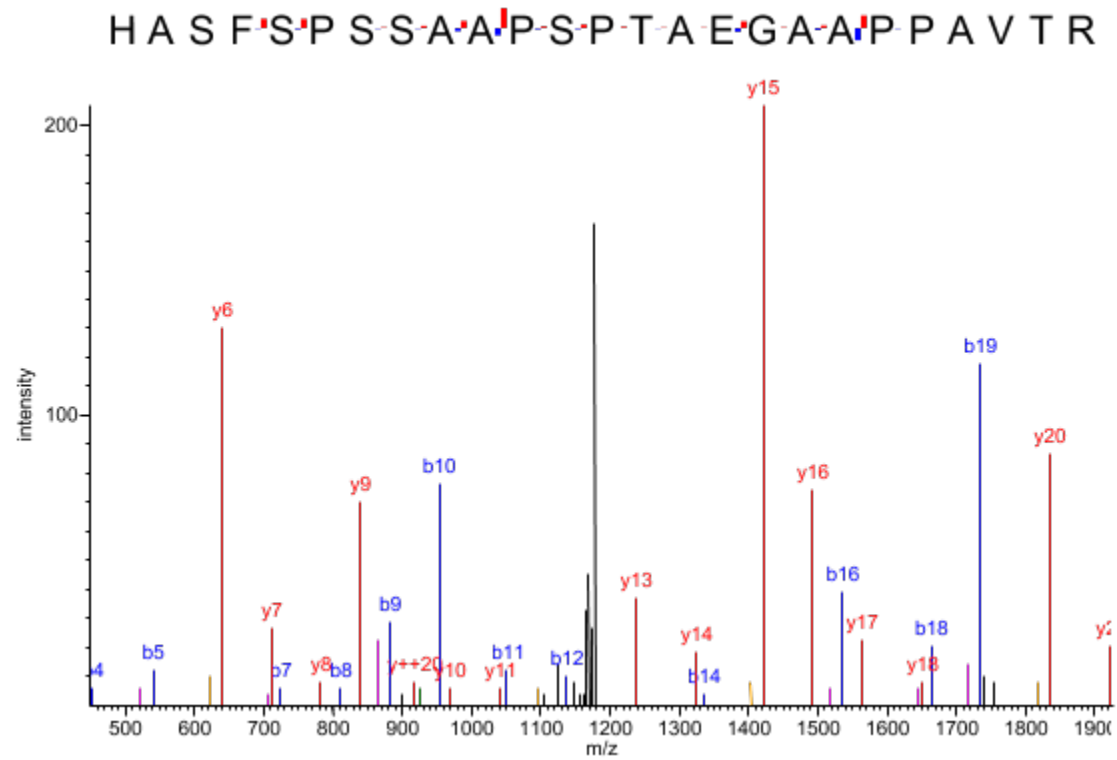



Peptide: MADGADAPGpTPR  
Protein: GRMZM2G099049\_P02; T118  
e-value: 1.8E-8

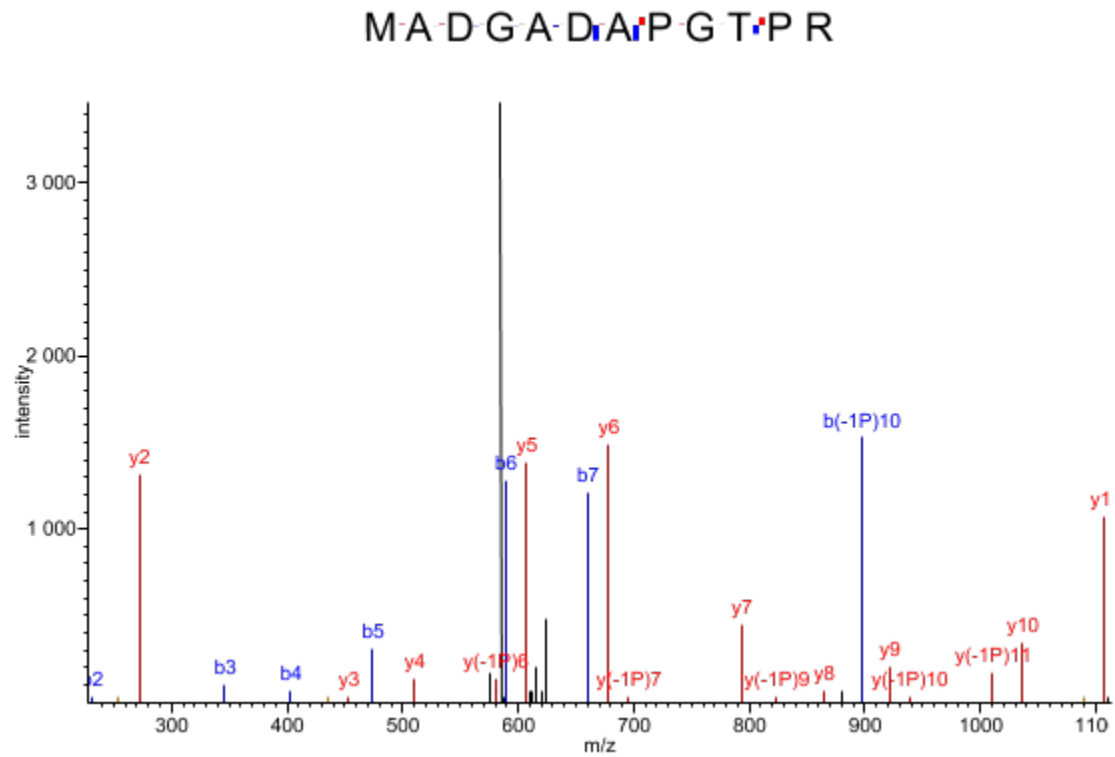

Peptide: AQSMPTTPVTPp(SSSSSST)TPR  
Protein: tr|B4FQ41|B4FQ41\_MAIZE; S59/S60/S61/T66  
e-value: 2.6E-16

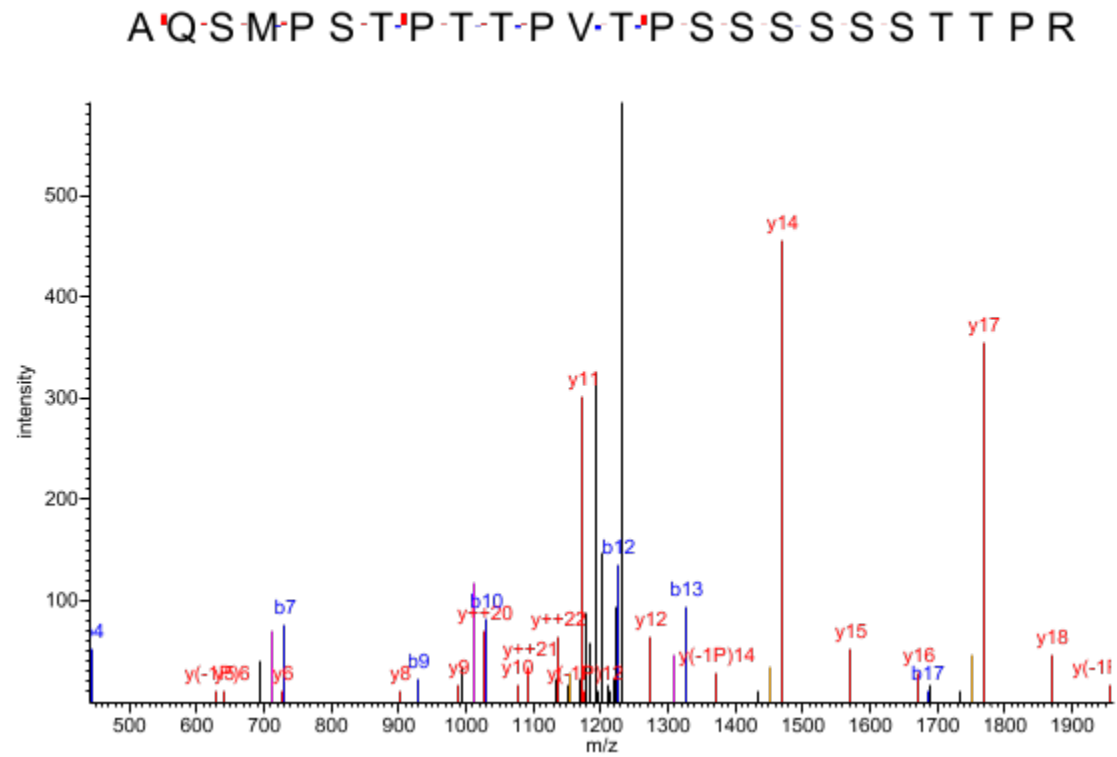

Peptide: EEPTSSGTSpTPR

Protein: tr|C4J107|C4J107\_MAIZE; T326

e-value: 4.3E-7

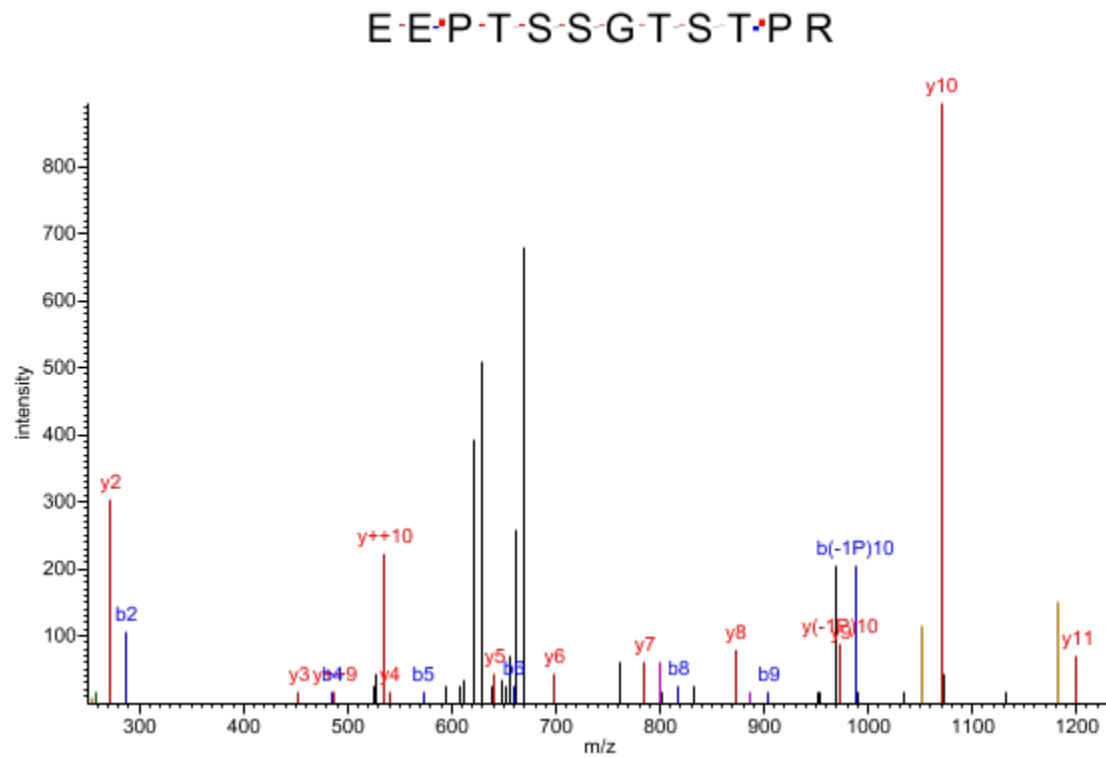

Peptide: GDATWMQELNIQRPPpTPTR  
Protein: tr|C0PIZ1|C0PIZ1\_MAIZE; T169  
e-value: 2.8E-4

G D A T W M Q E L N I Q R P P T P T R

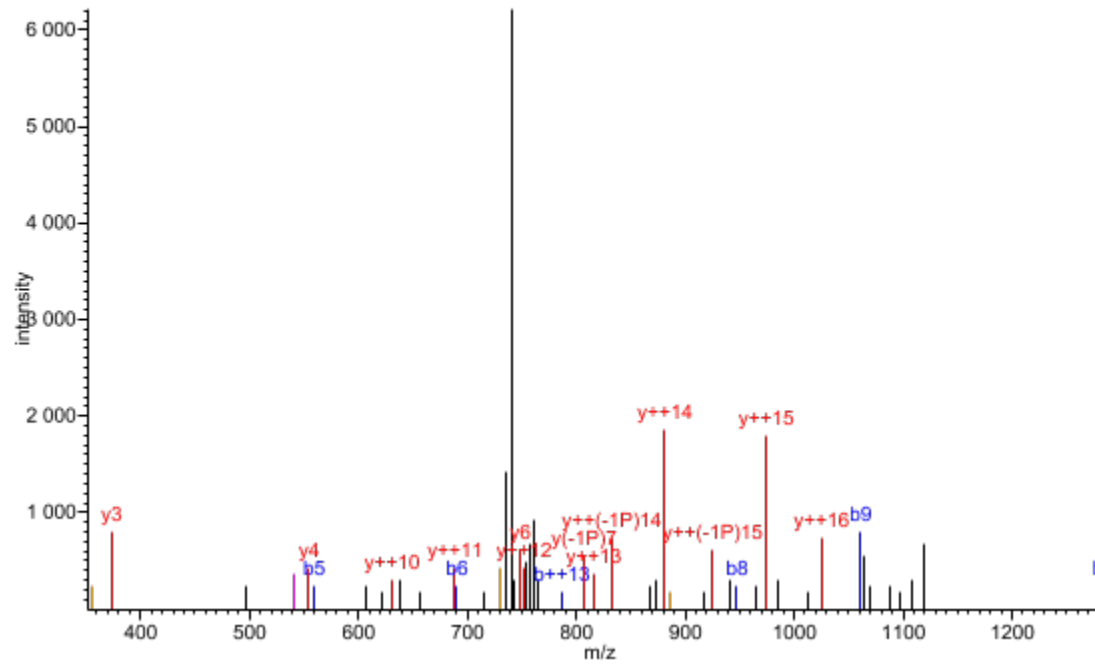

Peptide: GGTSSGAQpSGDGEYLK  
Protein: tr|A5HEH4|A5HEH4\_MAIZE; S212  
e-value: 1.1E-12

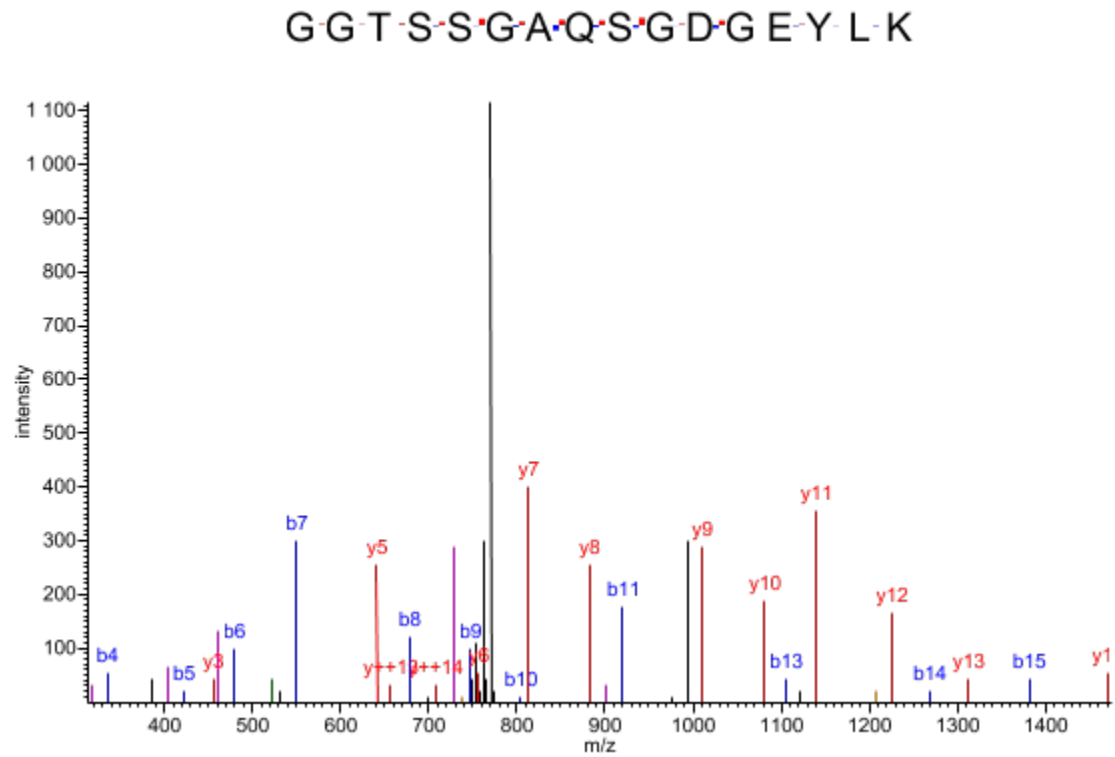

Peptide: MESVASAAIATpTSRSLPLPpSSAPVHR

Protein: GRMZM2G132636\_P01; T12, S21

e-value: 6E-3

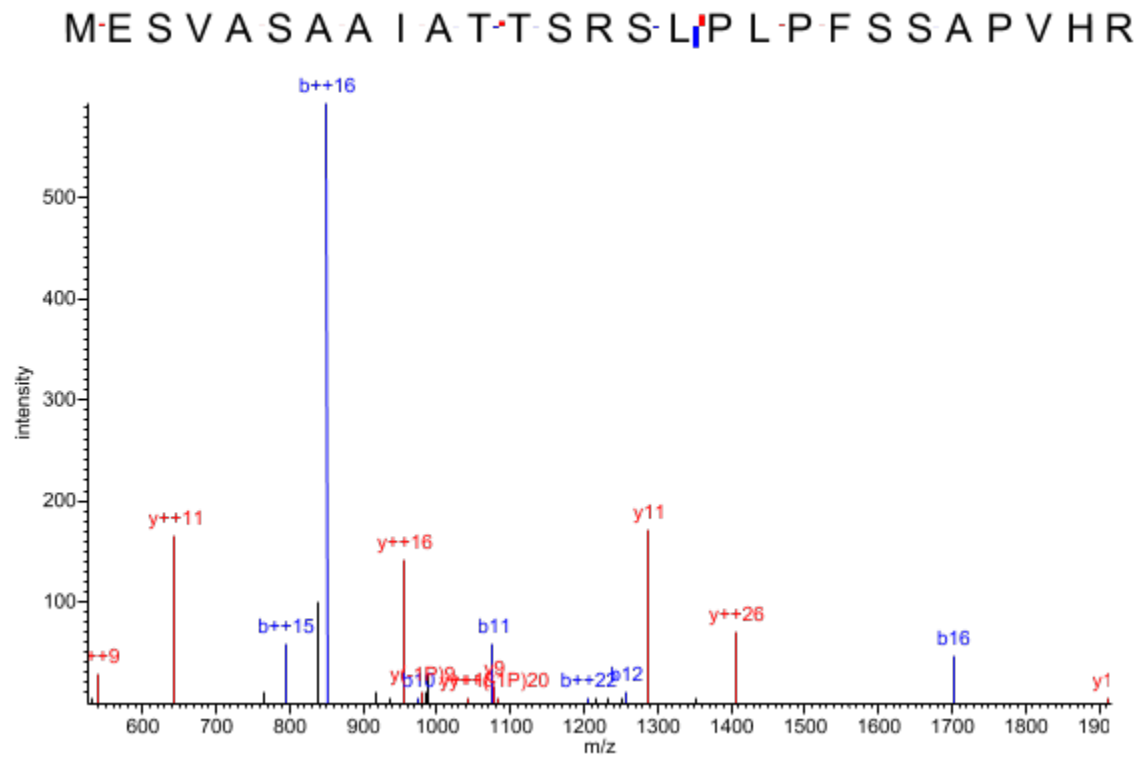

Peptide: LSDTELASSpSPLR  
Protein: GRMZM2G077596\_P01; S855  
e-value: 2.8E-8

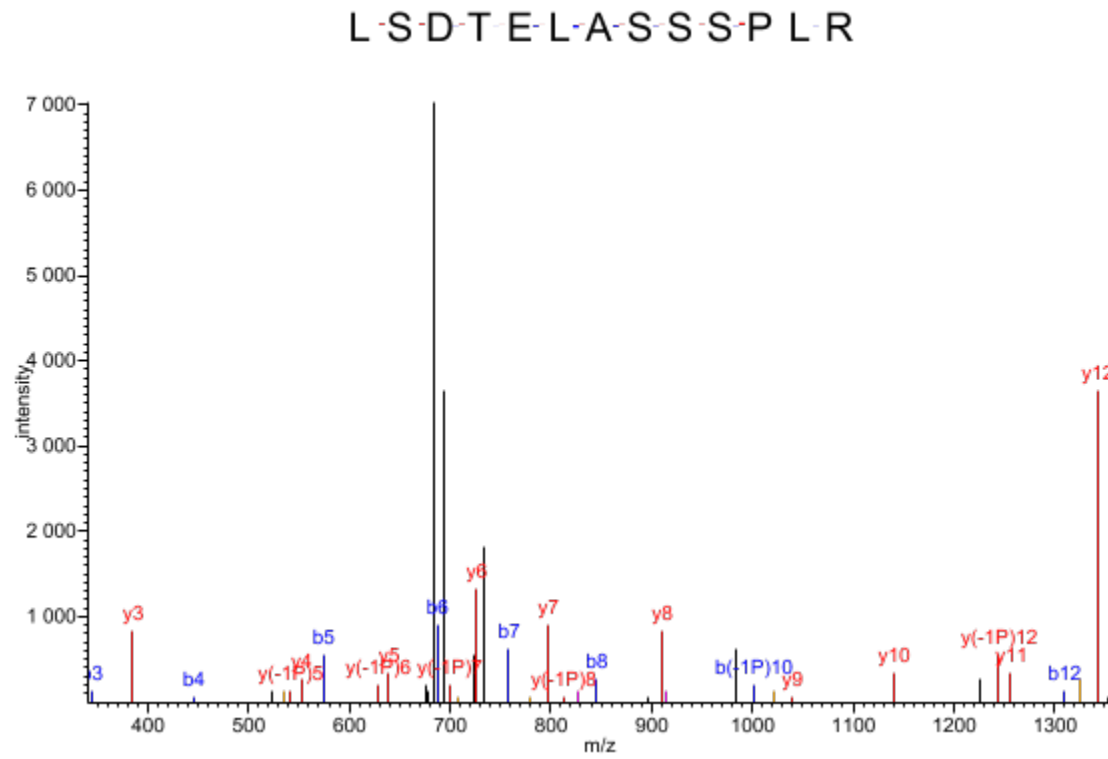

Peptide: NNLTEGGAEpSDEEIR

Protein: tr|B6UHC7|B6UHC7\_MAIZE; S43

e-value: 1.3E-9

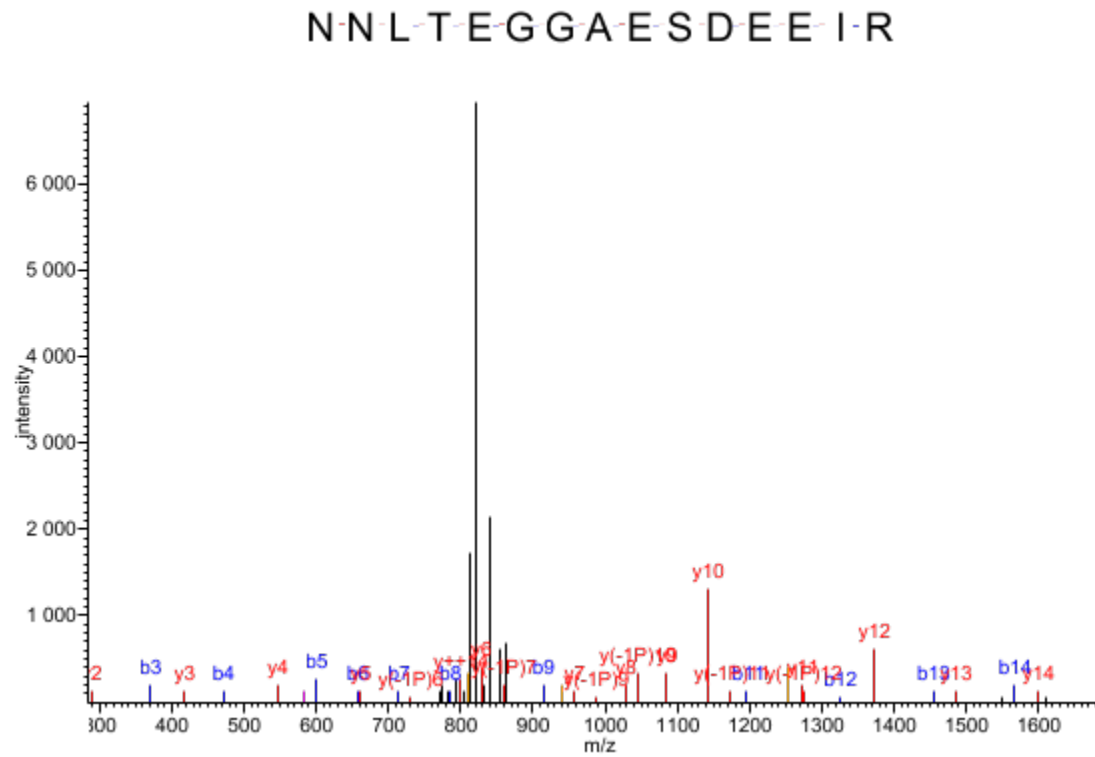



Peptide: SSNAPVASGpSPSNSVSK  
Protein: GRMZM2G360517\_P03; S1329  
e-value: 5.6E-10

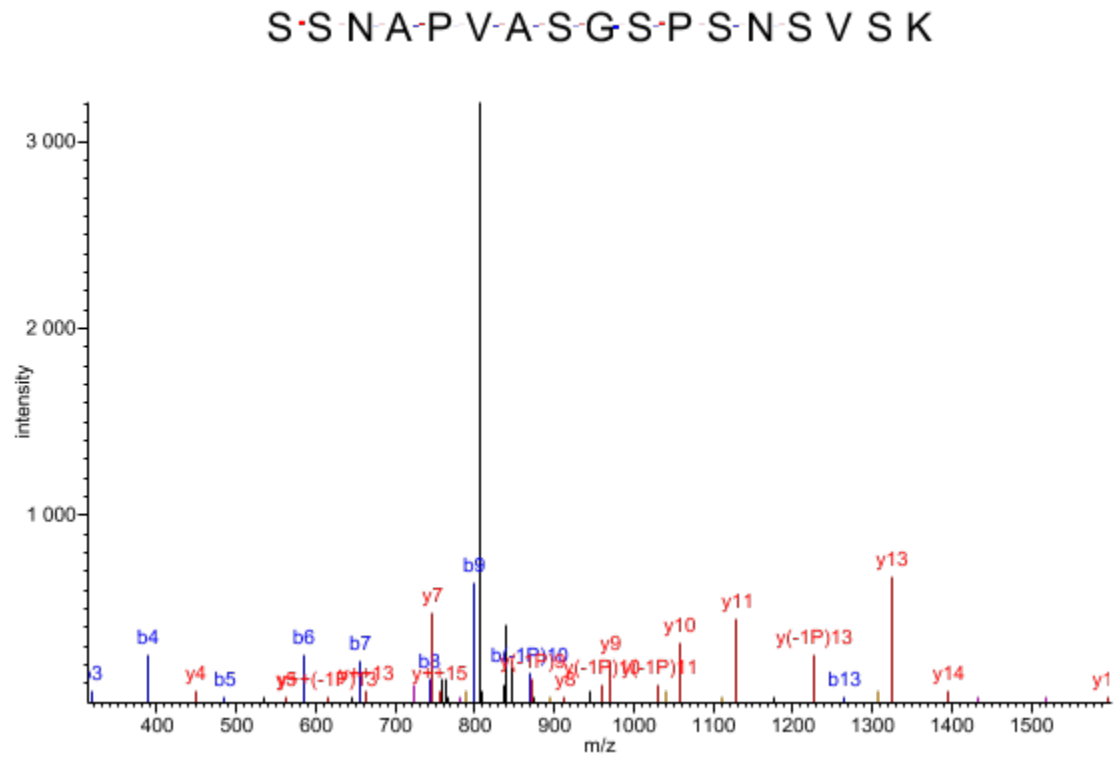

Peptide: STGGpSPPATGNAK

Protein: GRMZM2G360517\_P03; S1341

e-value: 5.4E-6

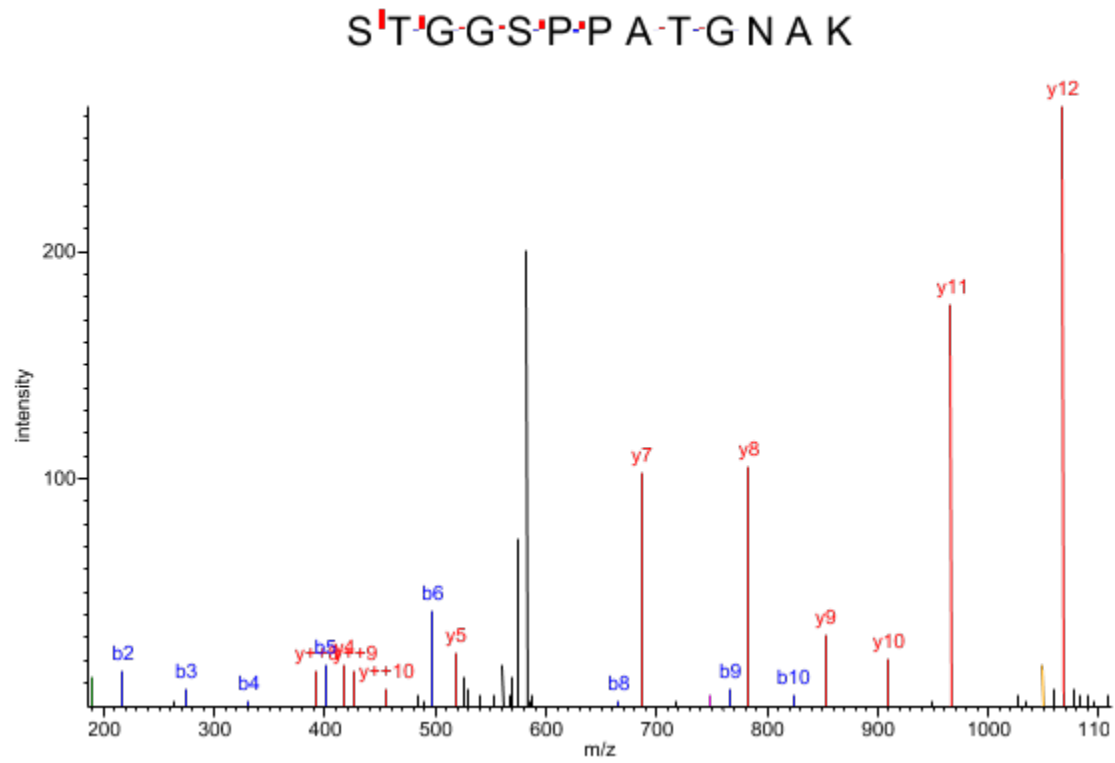

Peptide: p(TGGGS)SFGAGGGGGFGGGR

Protein: GRMZM2G403636\_P01; T71/S76

e-value: 1.3E-5

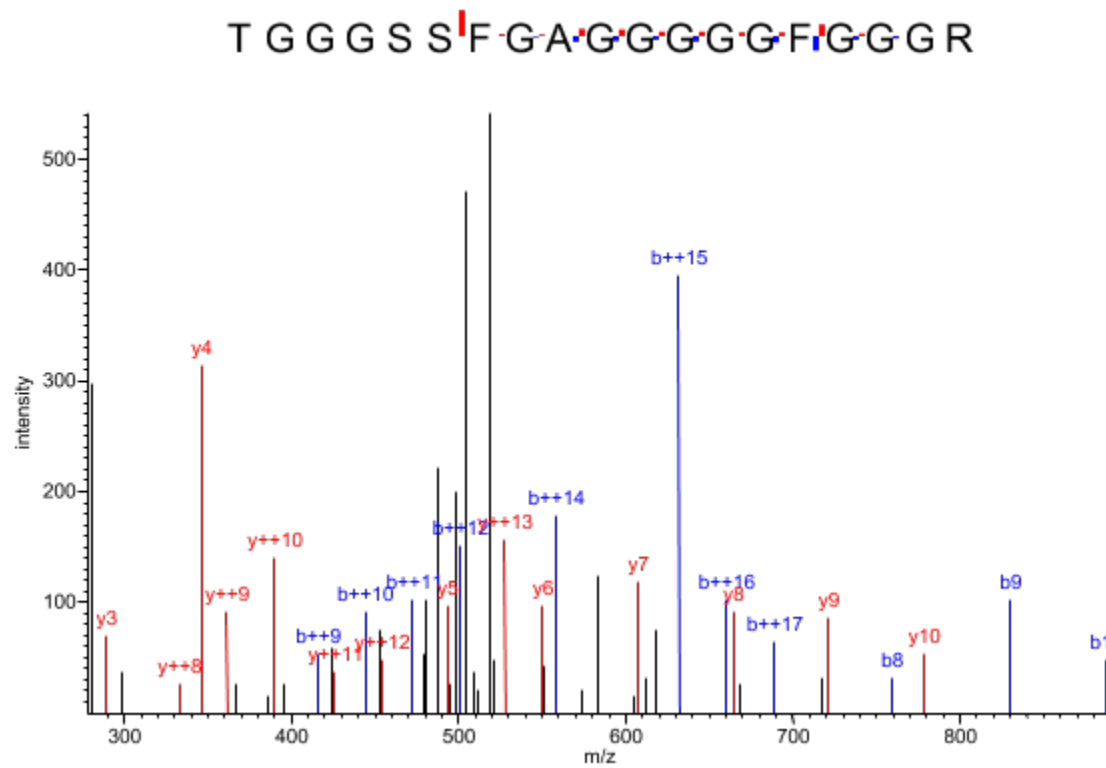

Peptide: pSGSMDGATSPFEGESAPTSVLPDYAK

Protein: tr|C0PBN0|C0PBN0\_MAIZE; S130

e-value: 2.6E-4

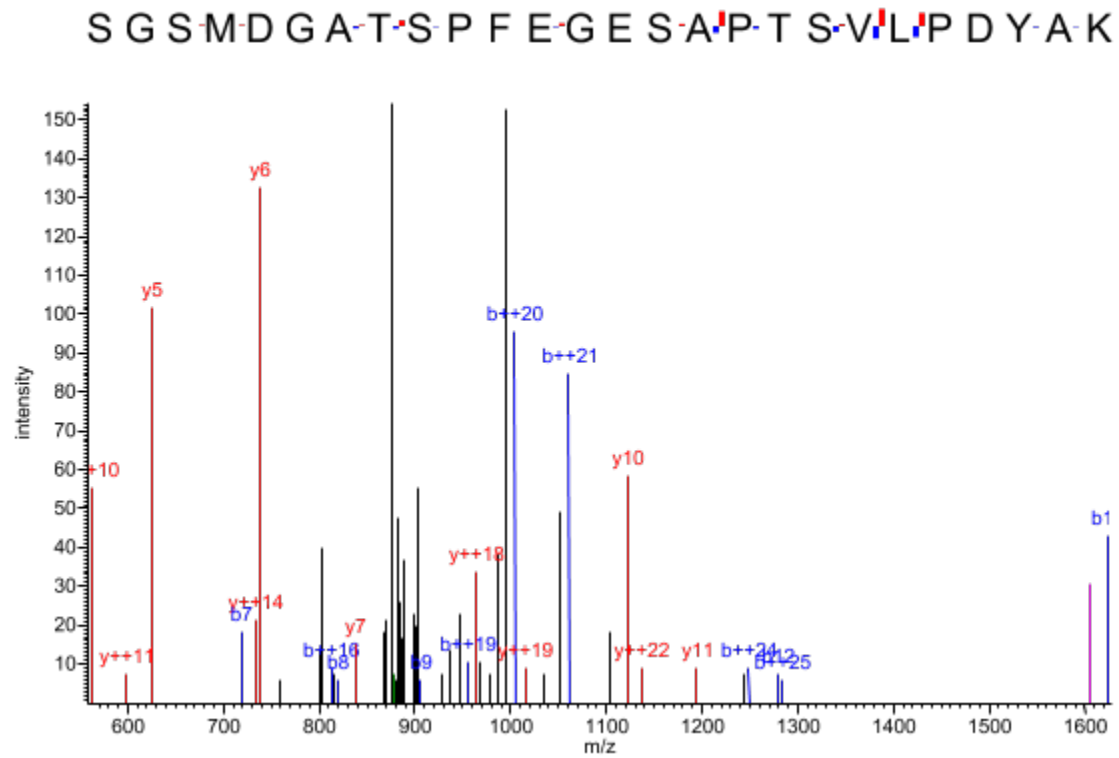

Peptide: EAMVEADADQDDEEDDp(SDHELELS)R

Protein: tr|B6T559|B6T559\_MAIZE; S93/S100

e-value: 1.5E-7

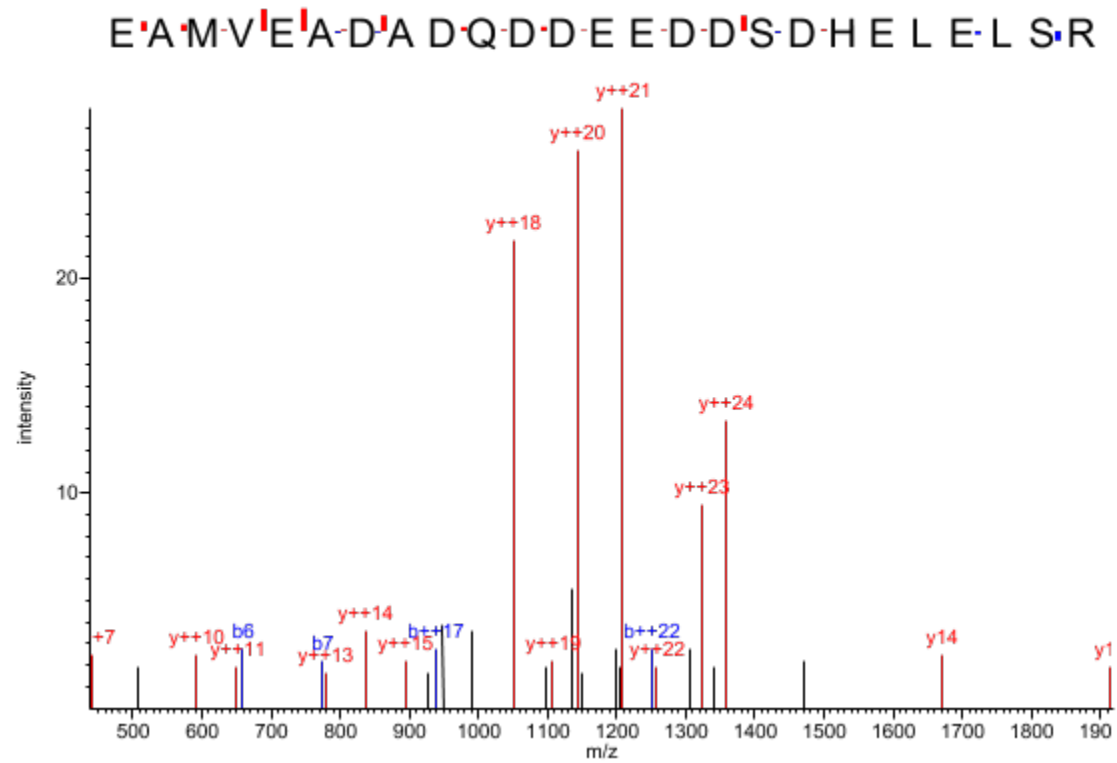

Peptide: VVSGDTAAGpSPANSHGK  
Protein: GRMZM2G331368\_P02; S1747  
e-value: 3.8E-5

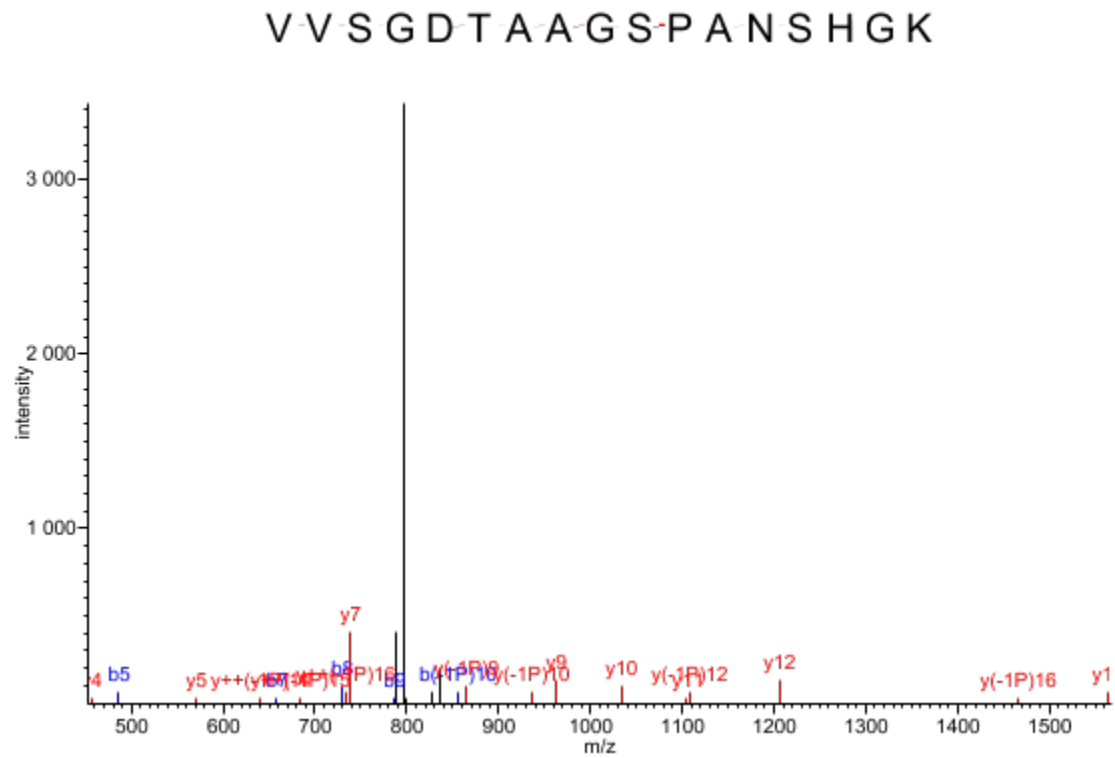

Peptide: MSLQGpSPPAQPEPK

Protein: tr|B7ZXG5|B7ZXG5\_MAIZE; S21

e-value: 2.0E-6

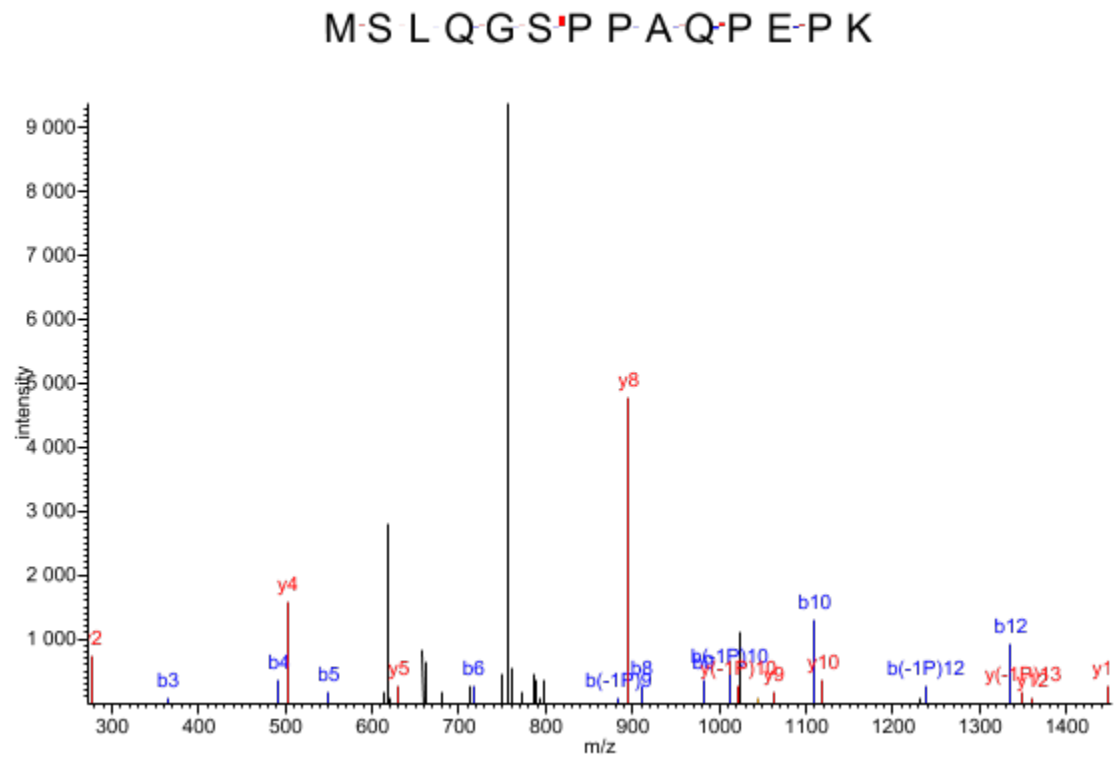

Peptide: SpSPIQSSGDPGPR

Protein: tr|B6TIB0|B6TIB0\_MAIZE; S178

e-value: 2.4E-5

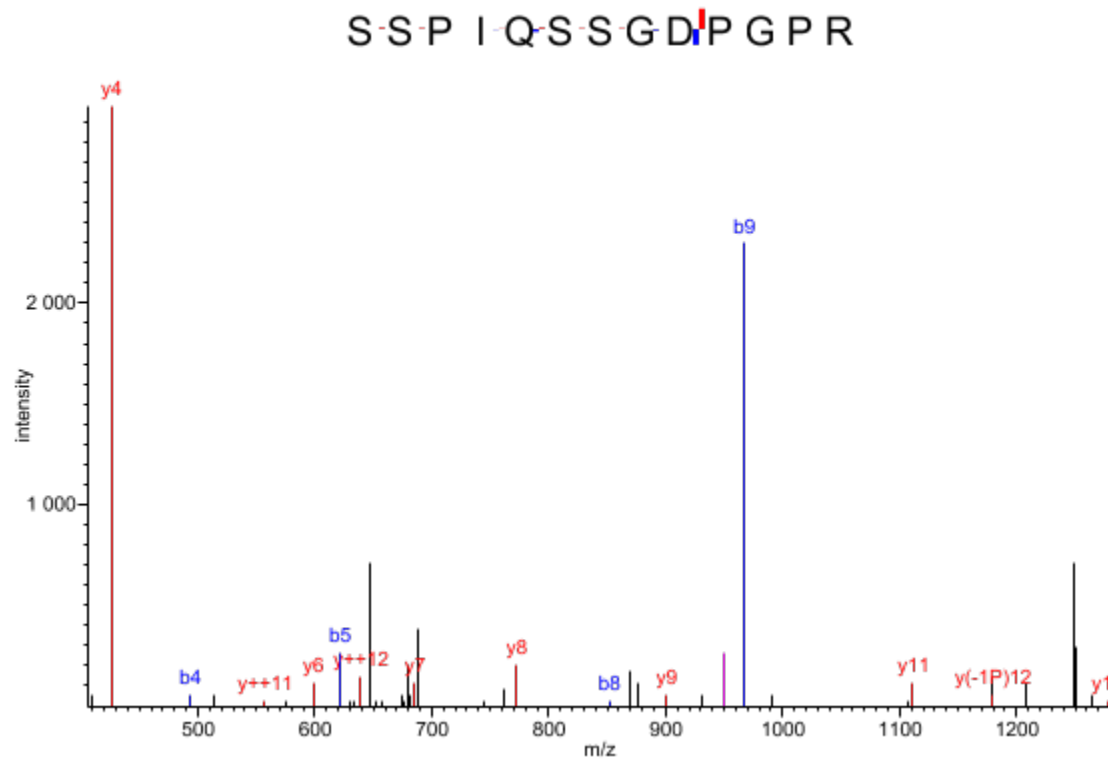



Peptide: DLAPPTETFTDRPPp(TS)DGPPAPGGPAK

Protein: tr|B4FBV8|B4FBV8\_MAIZE; T168/S169

e-value: 1.7E-7

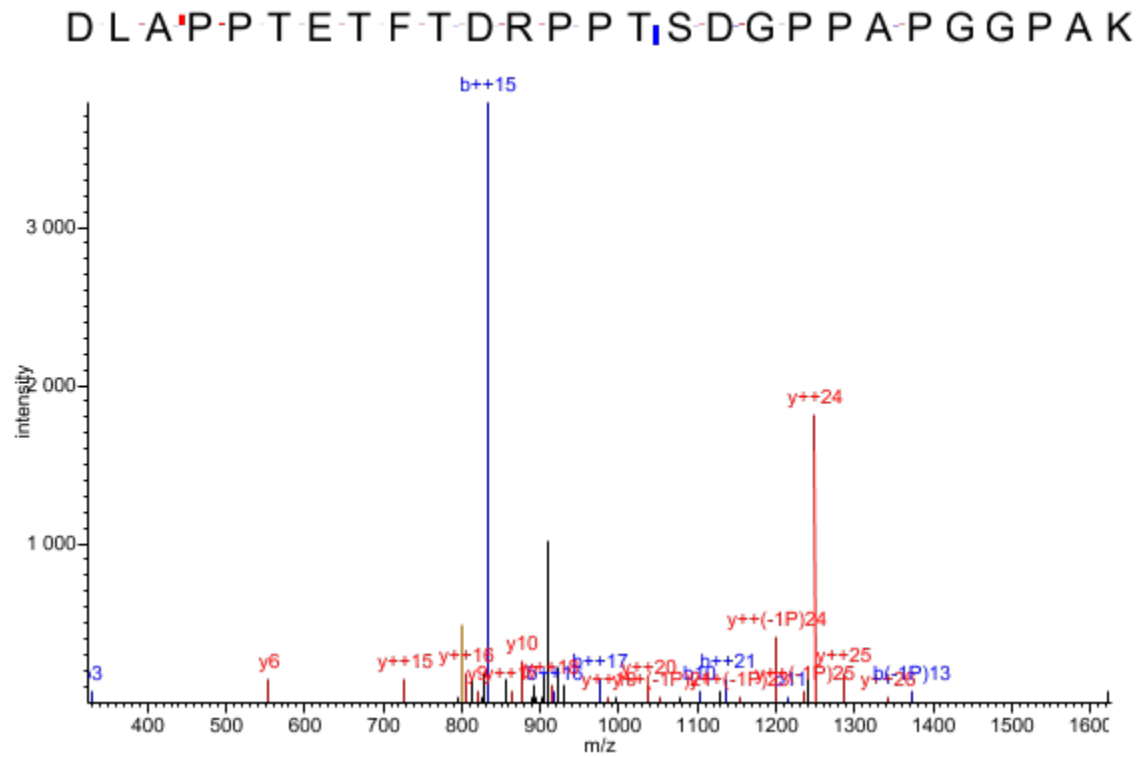

Peptide: TSpSAPPNLDEQK

Protein: GRMZM2G153162\_P03; S183

e-value: 1.5E-8

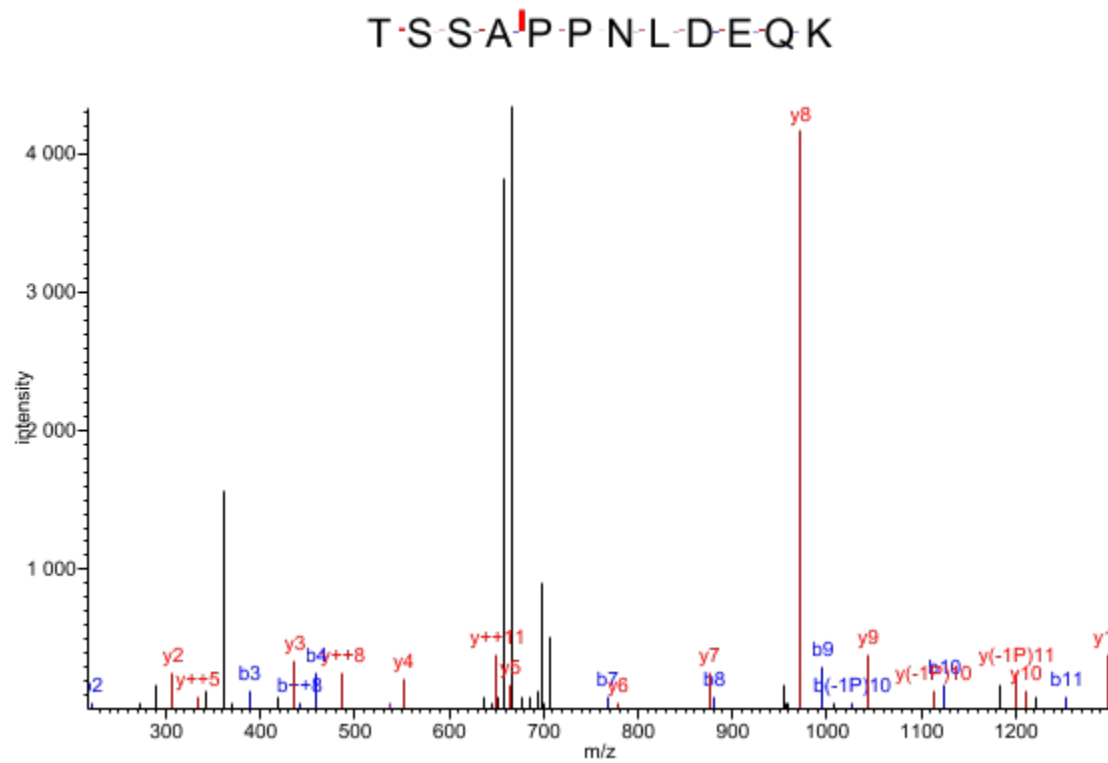

Peptide: DPSTASpTPPAEVAR

Protein: GRMZM2G163471\_P01; T274

e-value: 1.3E-9

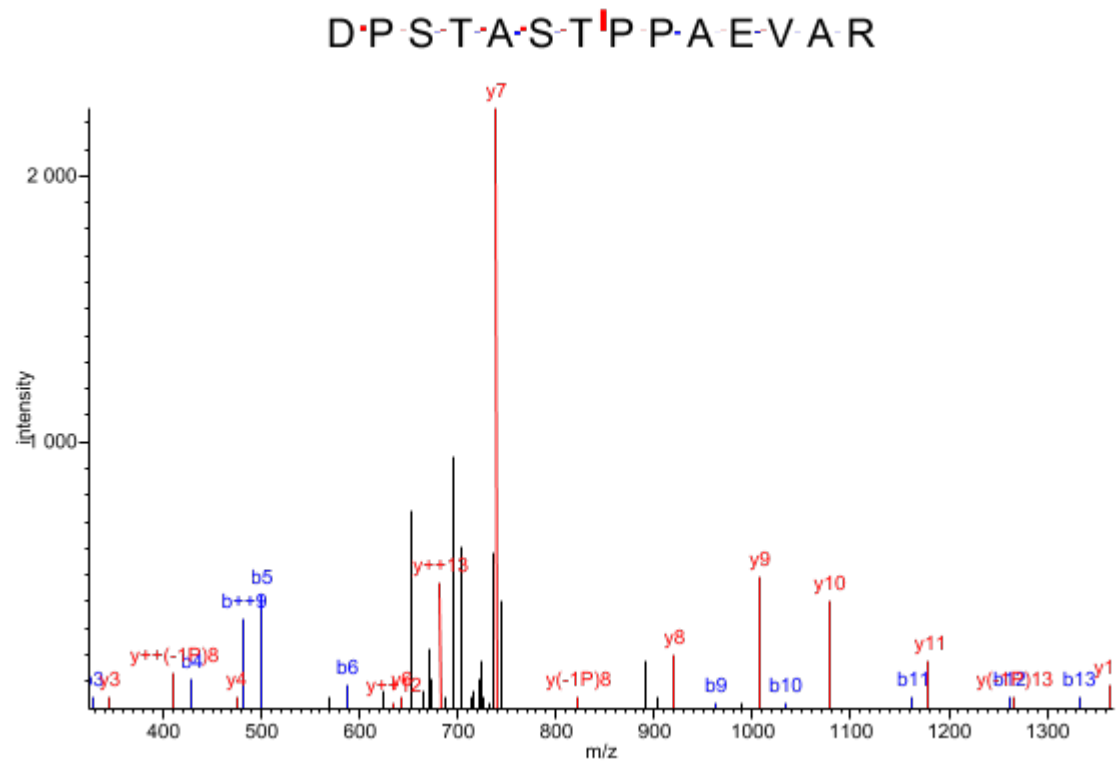

Peptide: NApSTSSDMSSMASQGPSTSTAPLR

Protein: GRMZM2G058491\_P01; S217

e-value: 1.4E-17

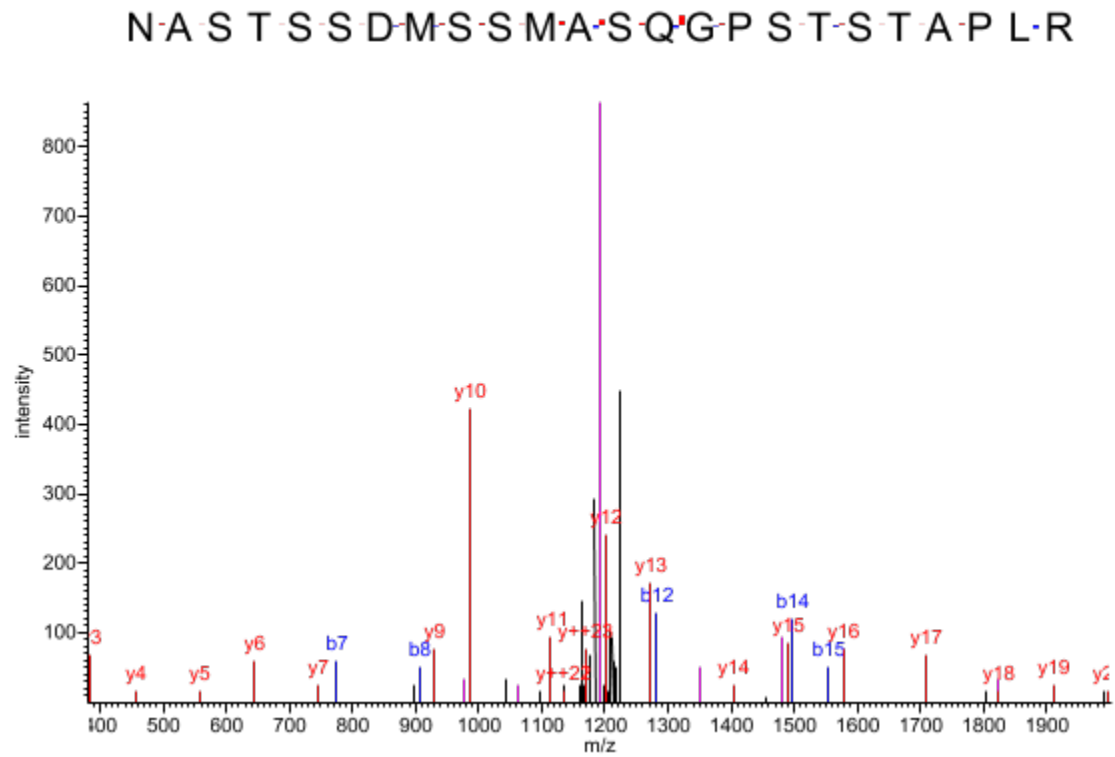

Peptide: SSEpSMSNLTK

Protein: GRMZM2G058491\_P01; S205

e-value: 3.7E-5

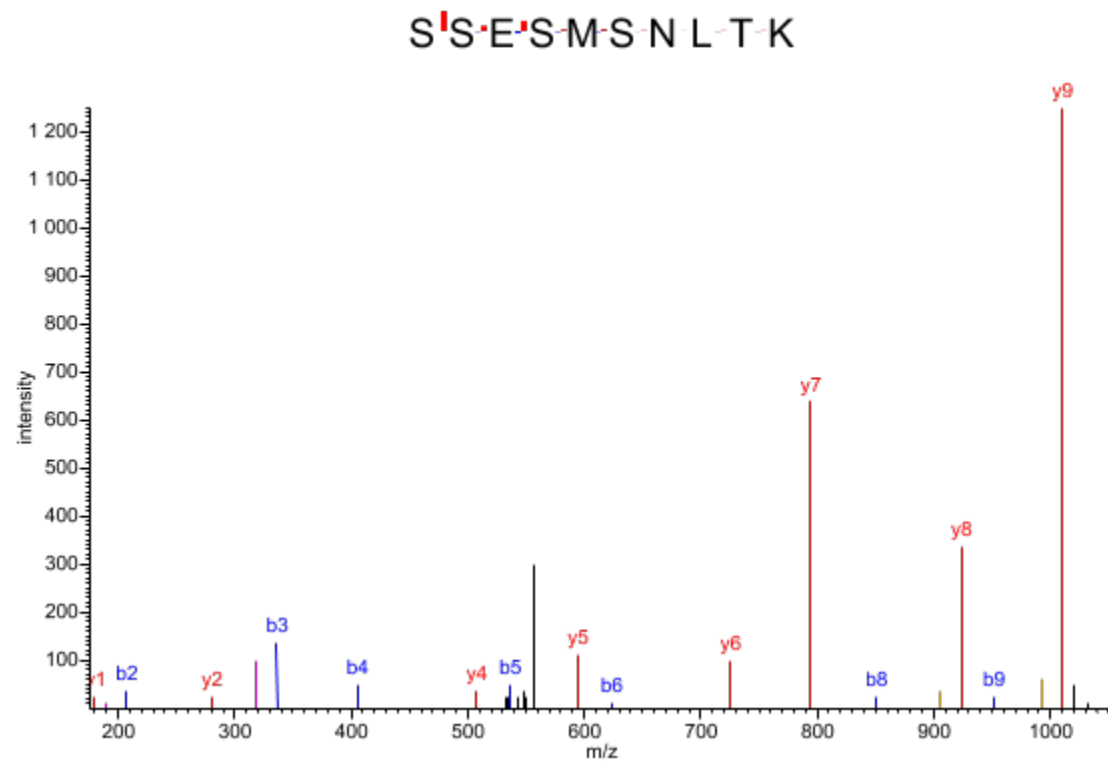

Peptide: SIpSETTLER

Protein: GRMZM2G058491\_P01; S162

e-value: 6.7E-4

S·I·S·E·T·T·L·E·R

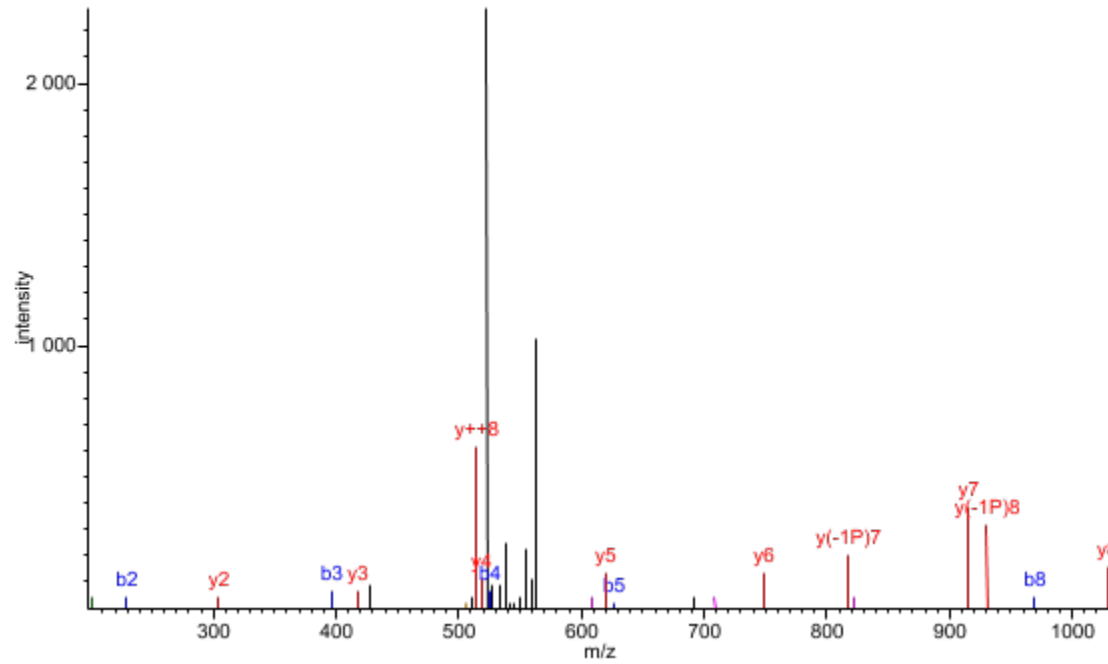

Peptide: ELMDSGTDPMALMSQLAGLIMDIAGTYK

Protein: GRMZM2G117028\_P01; T707

e-value: 3E-3

E L M D S G T D P M A L M S Q L A G L I M D I I A G T Y K

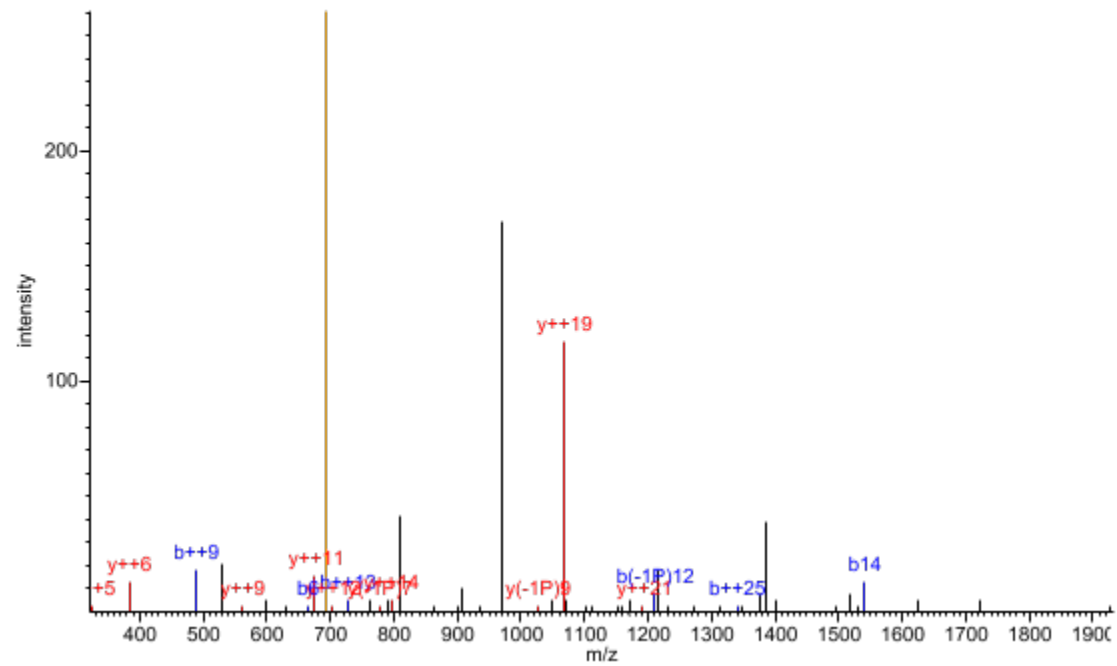

Peptide: ATQTVEDp(SS)RPKPK  
Protein: sp|P24993|PSBH\_MAIZE; S9/S10  
e-value:

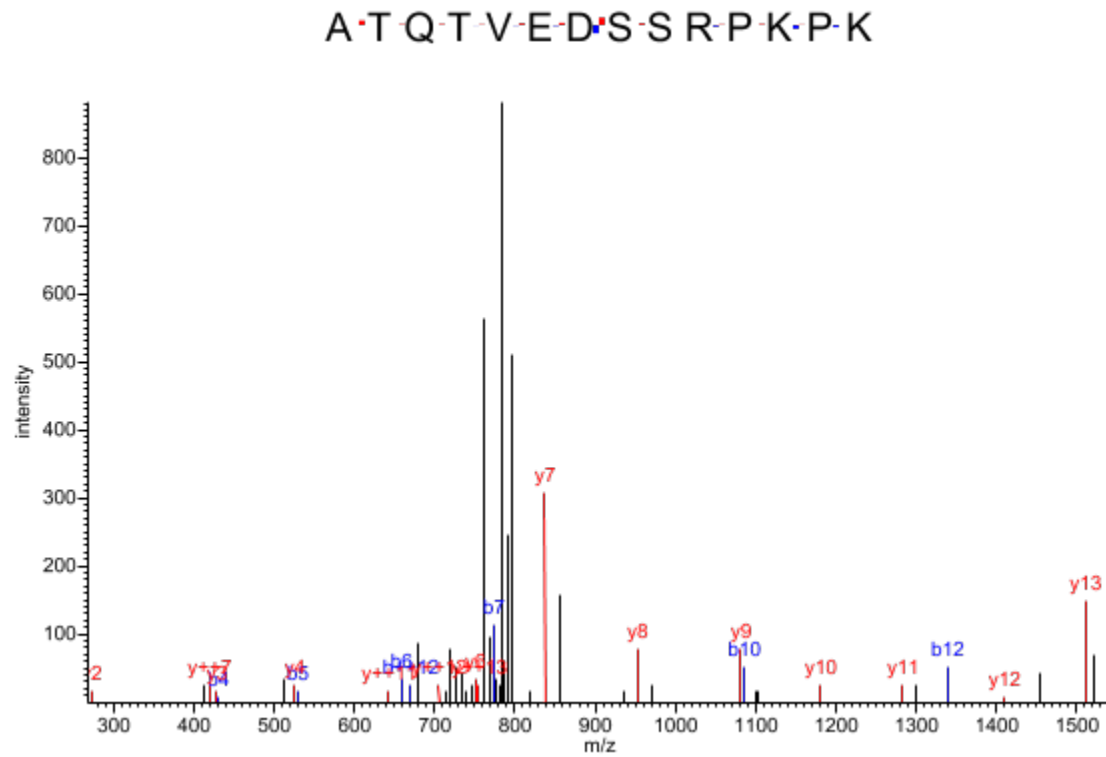



Peptide: NEAGGIIGpTRFESSEVK  
Protein: tr|C0HF02|C0HF02\_MAIZE; T112  
e-value: 3.9E-4

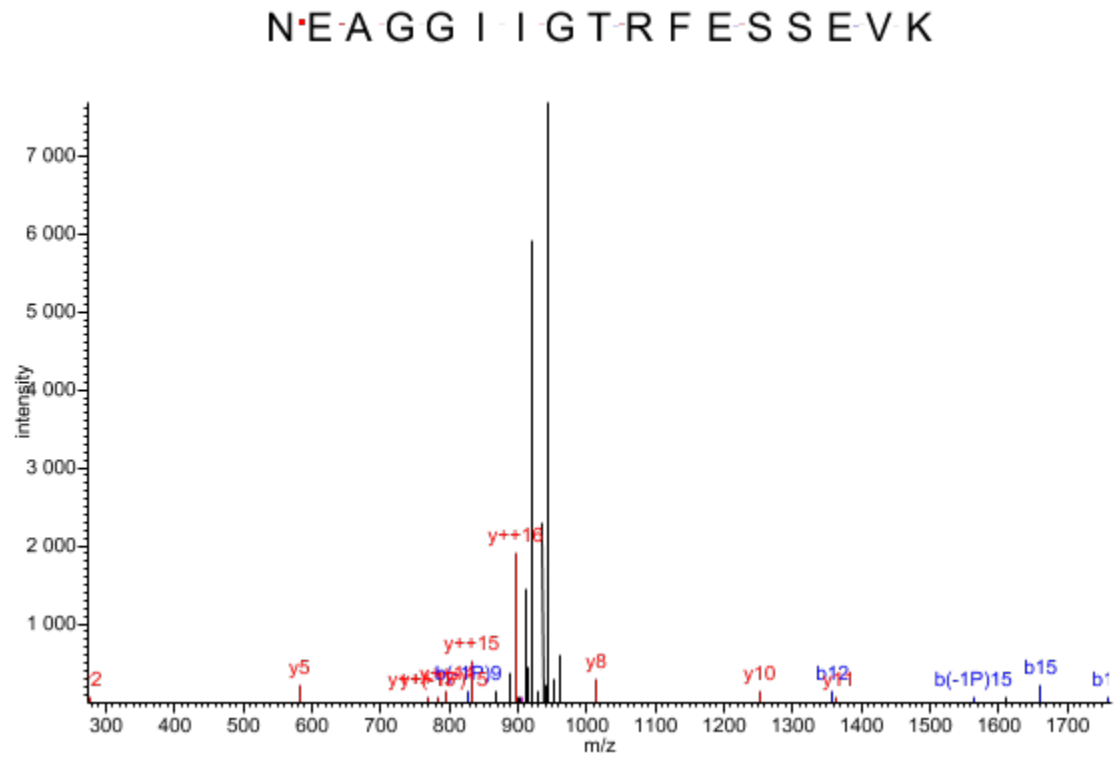

Peptide: LTSQGAAEVPQTSK  
Protein: AC217556.3\_FGP003; T328  
e-value: 6.5E-6

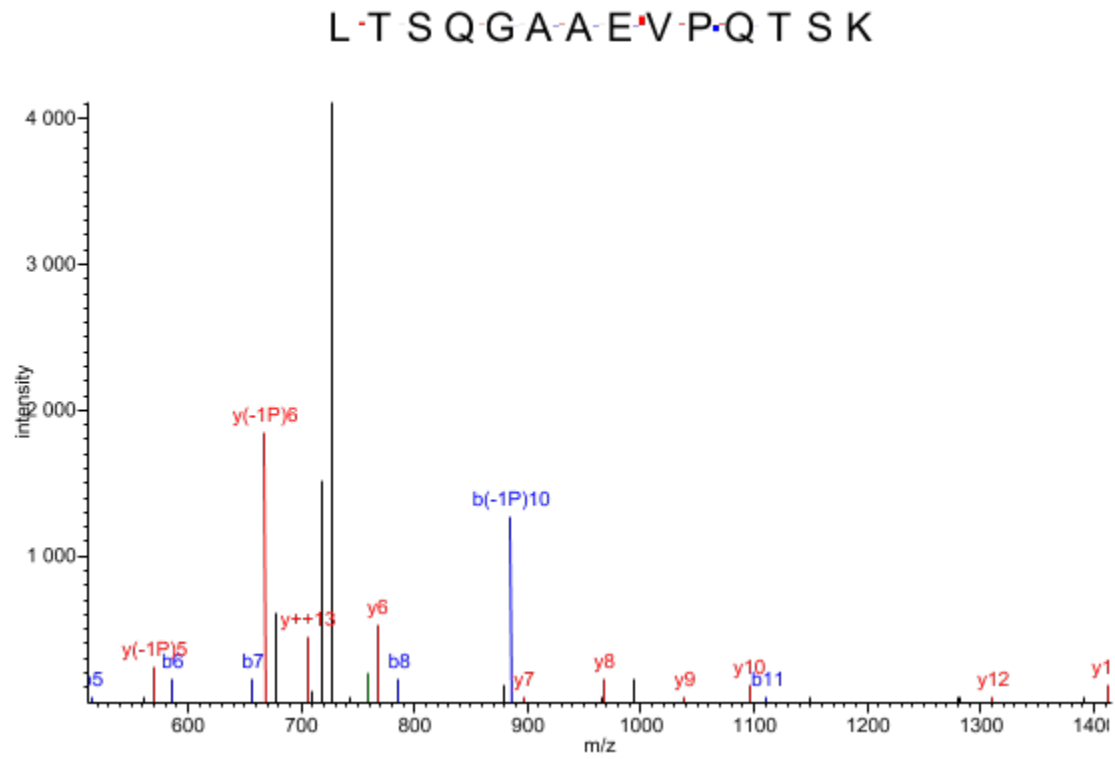

Peptide: TGpTPPHAPEEEKK

Protein: tr|B6SS21|B6SS21\_MAIZE; T194

e-value: 4.4E-5

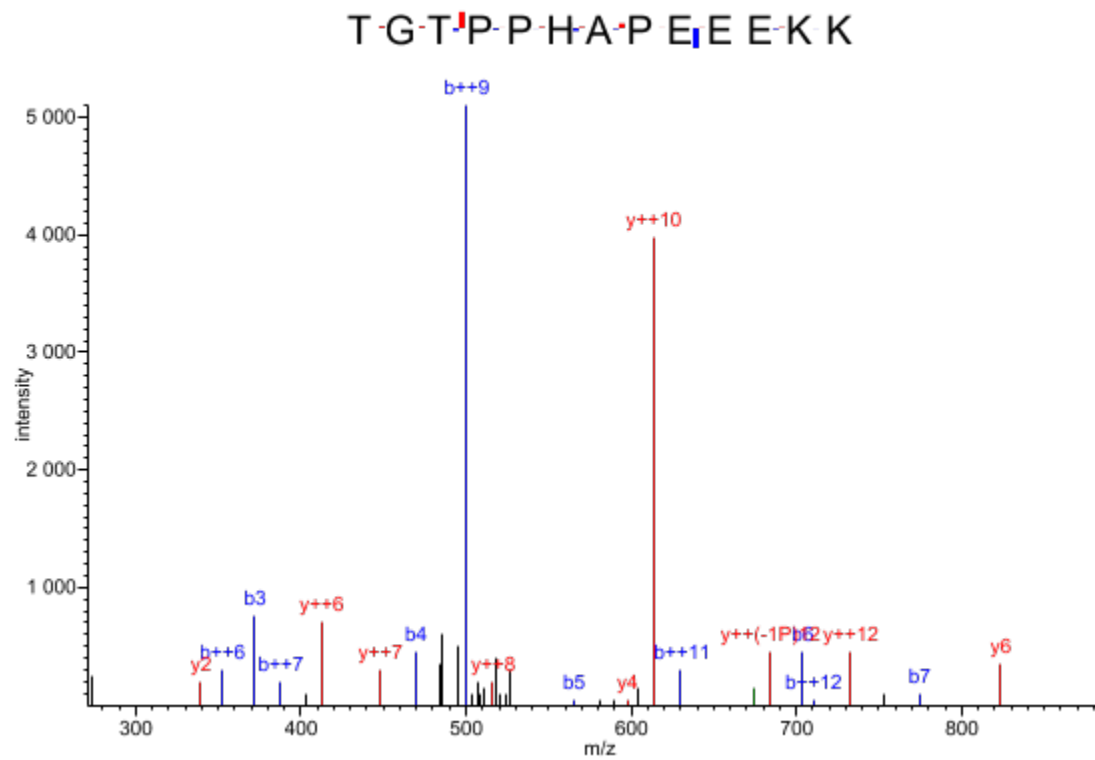

Peptide: LTDMEIDEEETTMHVDVNNIEEEMR

Protein: tr|B8A362|B8A362\_MAIZE; T377

e-value: 4.3E-4

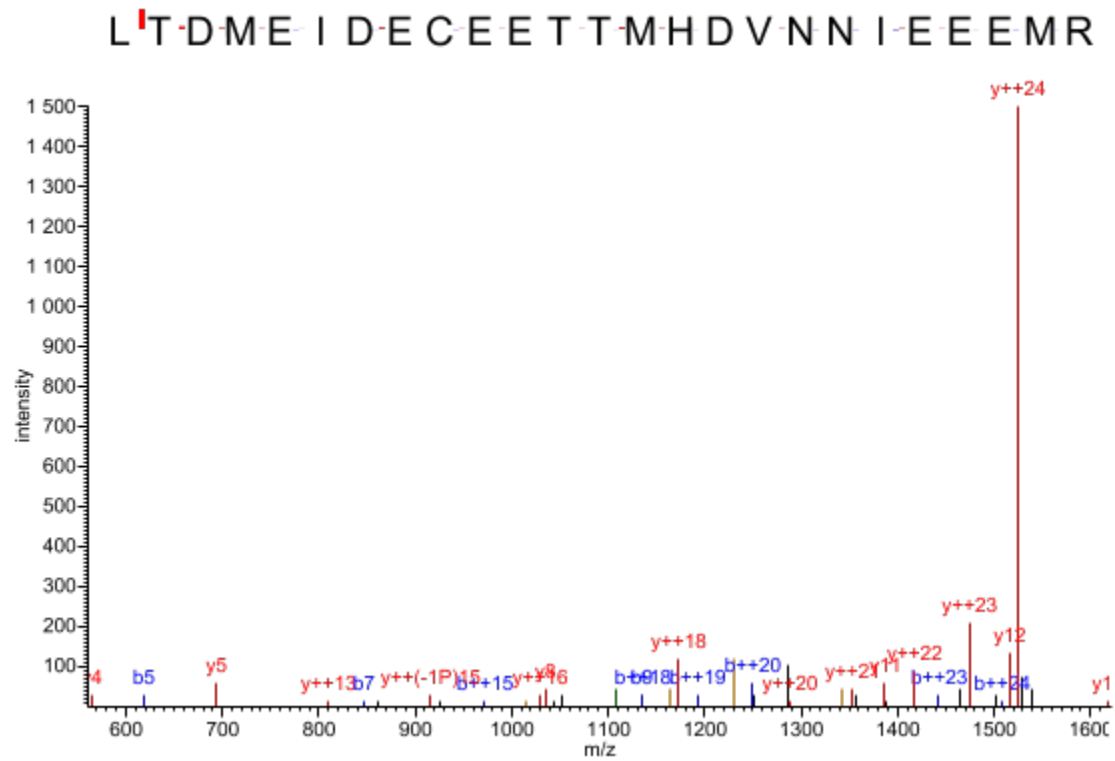

Peptide: SGpSSSSSSSEDDGMGGR  
Protein: tr|A7RDP0|A7RDP0\_MAIZE; S78  
e-value: 9.9E-13

S•G S S S S S S S E D D G M G G R

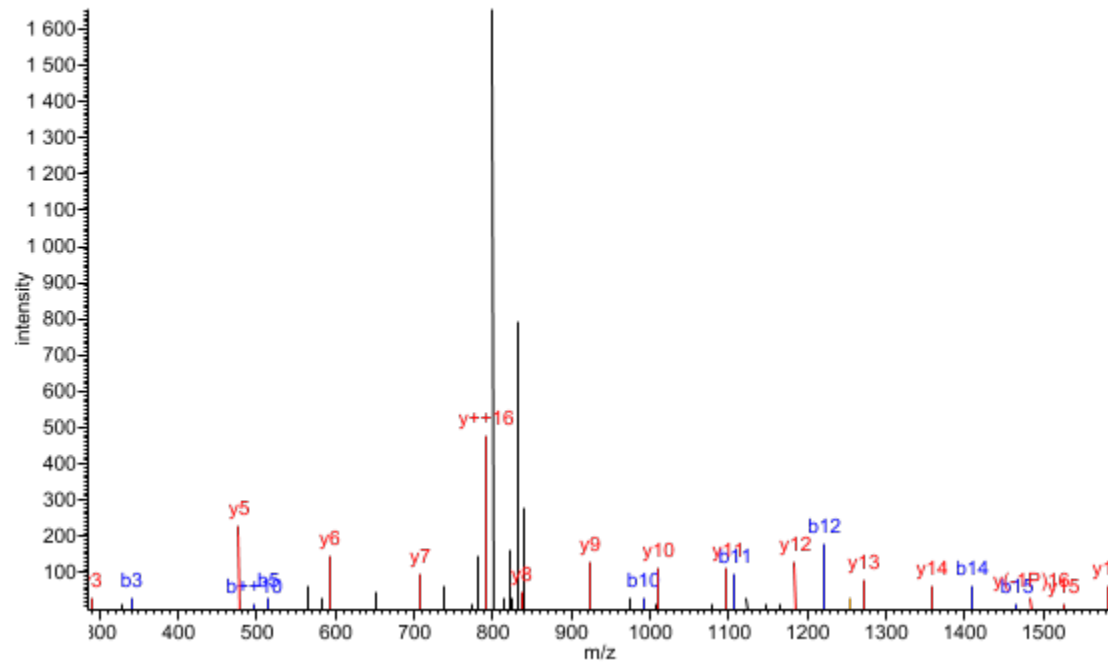

Peptide: SpSPAAATTDAAESTGADSIQVK  
Protein: tr|C4JAS1|C4JAS1\_MAIZE; S401  
e-value: 2.9E-15

S·S·P·A·A·A·T·T·D·A·E·S·T·G·A·D·S·I·A·V·K

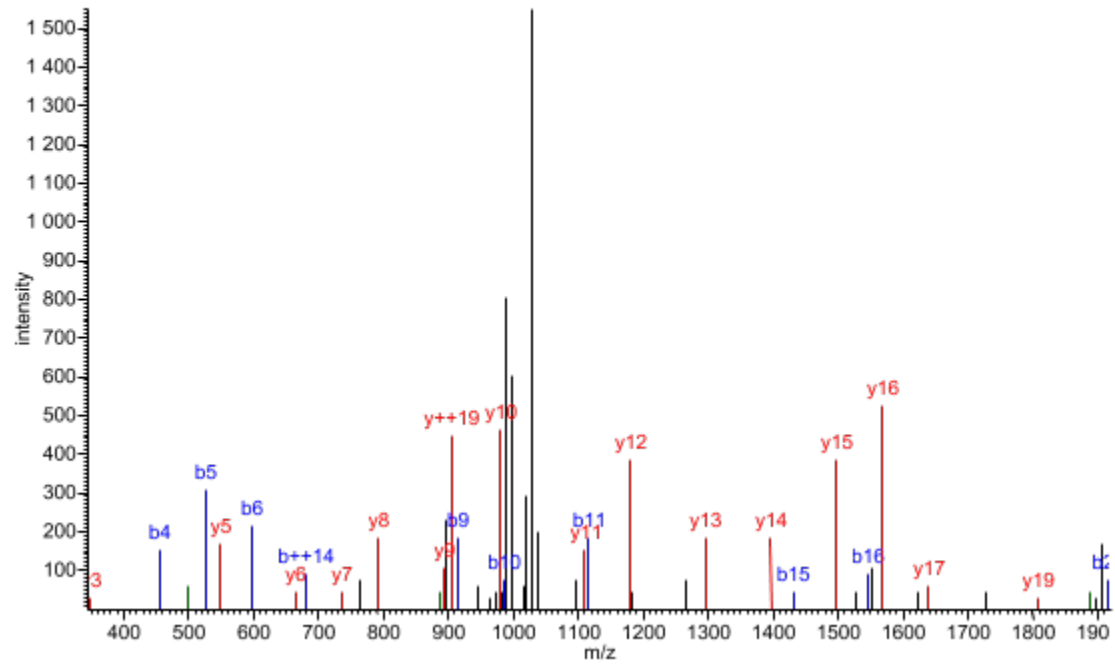

Peptide: GGMpTSHAAVVAR

Protein: tr|C5IHC4|C5IHC4\_MAIZE; T461

e-value: 4.7E-5

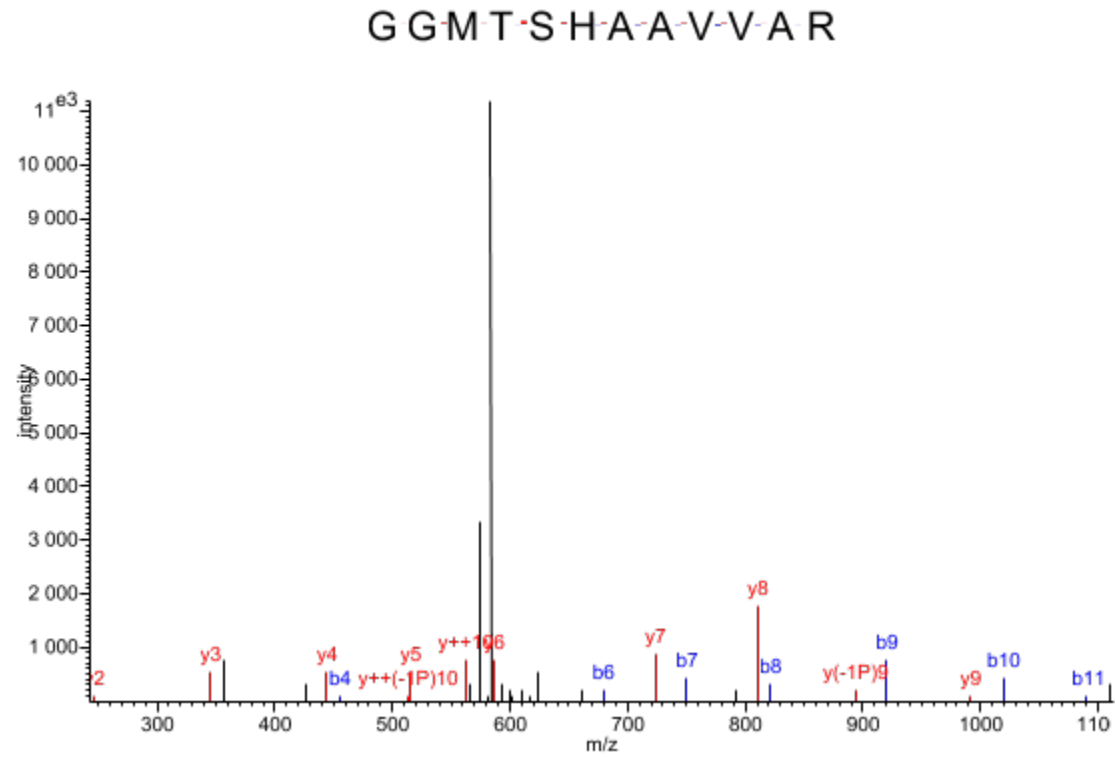

Peptide: ETQEALDGSEETA<sup>p</sup>SAGPDEDTSAVDVK

Protein: tr|B4FJ52|B4FJ52\_MAIZE; S258

e-value: 3.6E-10

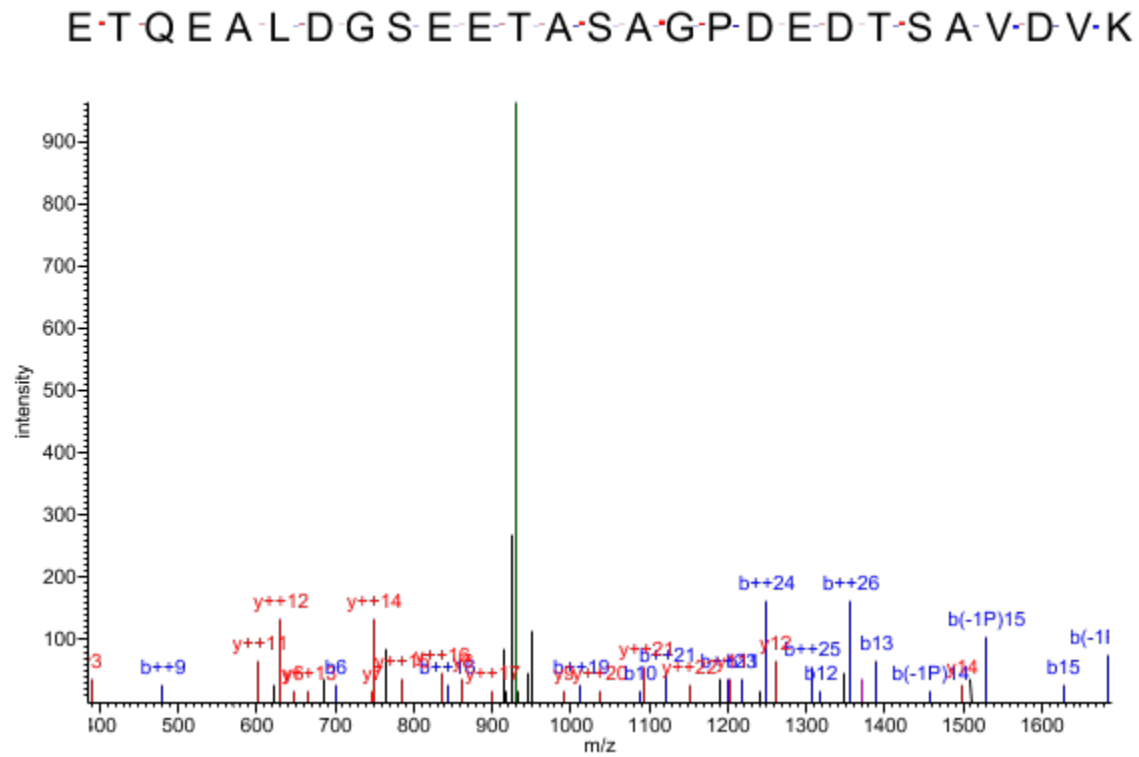



Peptide: MNQSLFLVGEIGGNDpYNGPLLSGVPMEKIR

Protein: GRMZM2G166987\_P02; Y17

e-value: 8E-3

MNQSLFLVGEIGGNDYNGPLLSGVPMEKIR

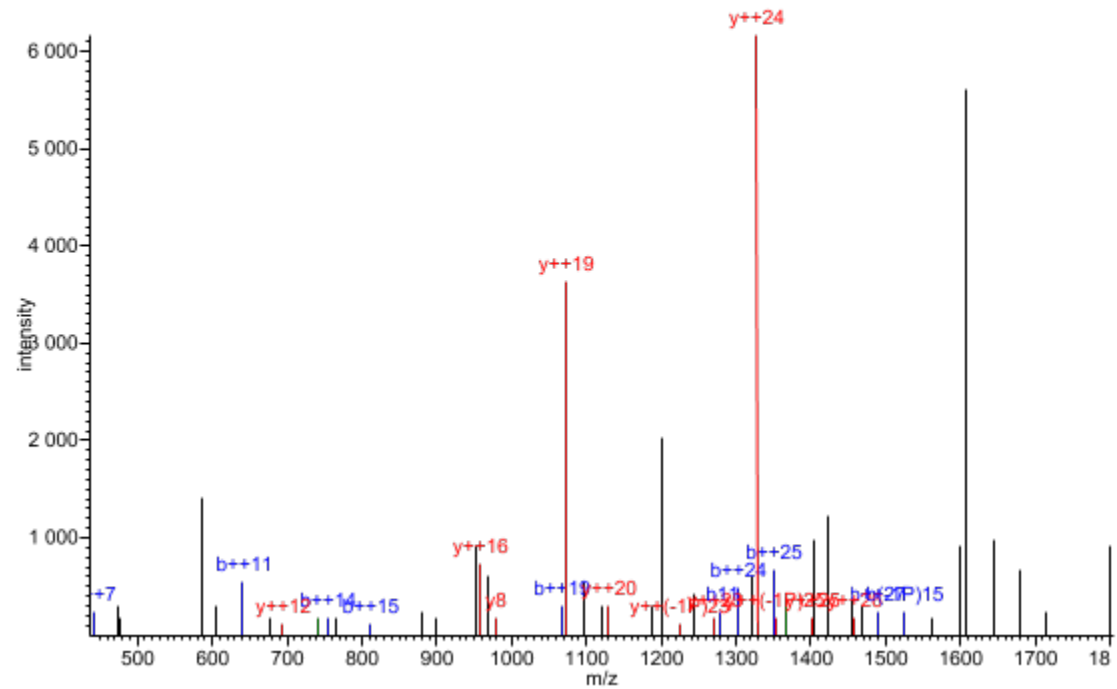

Peptide: p(SPT)TTTAIQSTIQSIK  
Protein: GRMZM2G033130\_P04; S19/T21  
e-value: 8.6E-10

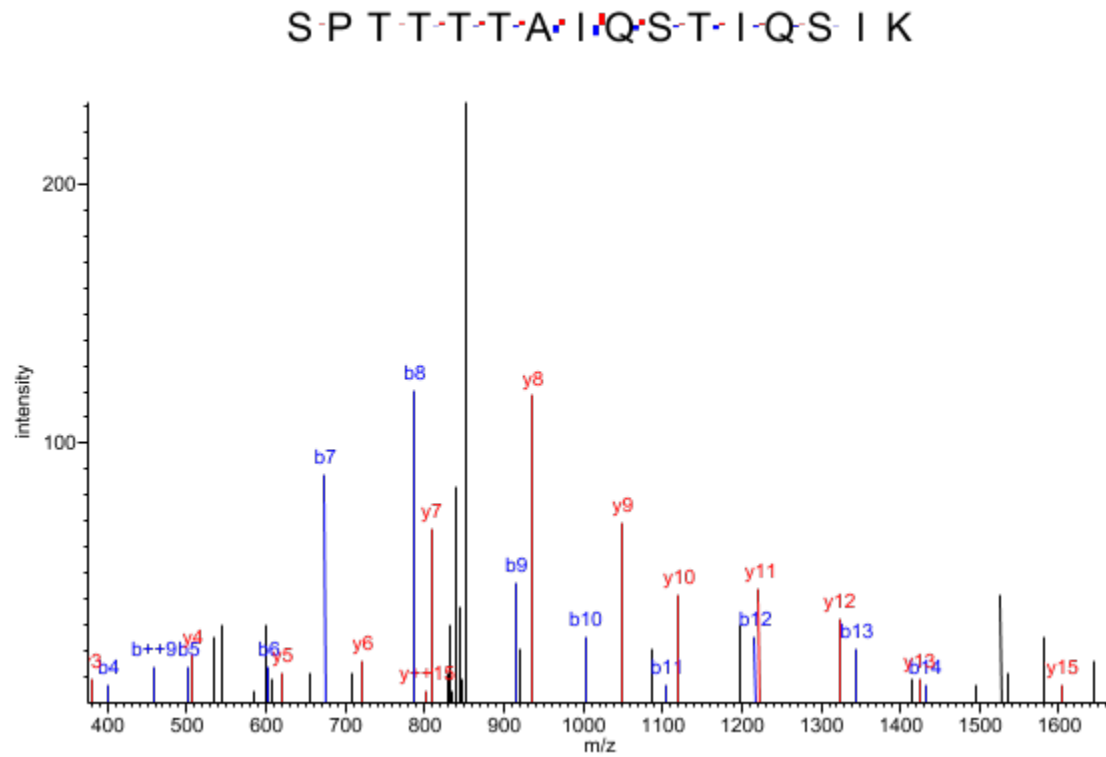

Peptide: MAAEDGEADSPAPAPVp(SPT)GAAAASGGGTEK

Protein: tr|B4FWN7|B4FWN7\_MAIZE; S33/T35

e-value: 5.4E-12

MAAEDGEADSPAPAPVp(SPT)GAAAASGGGTEK

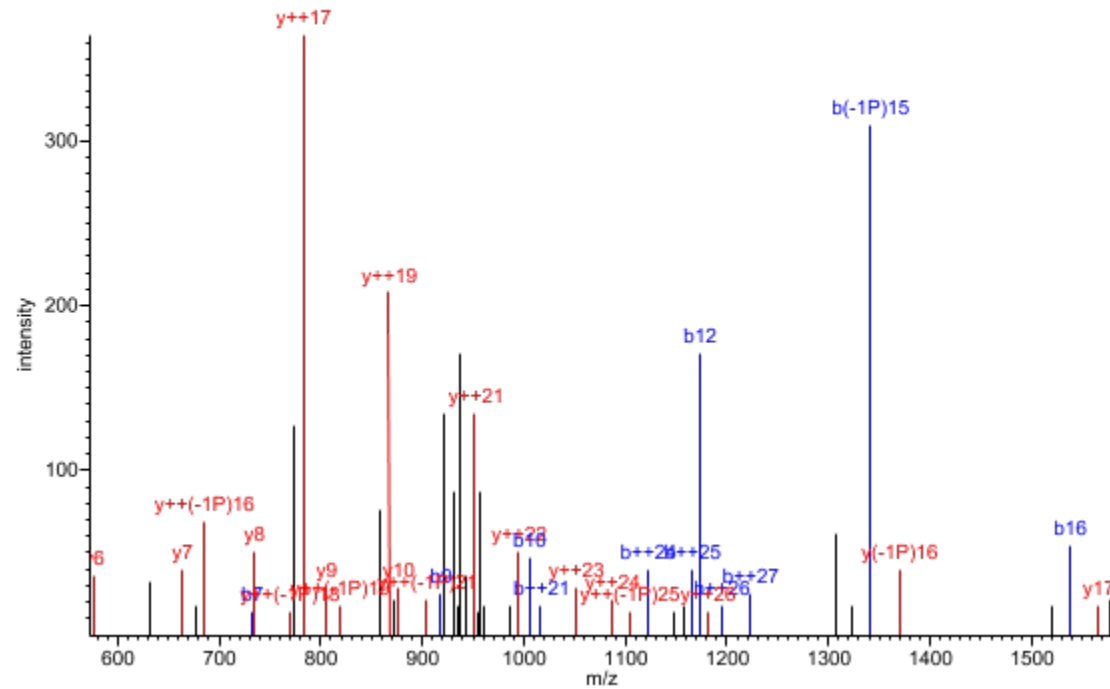

Peptide: SFpTSTSYDPVTK  
Protein: GRMZM2G007486\_P02; T320  
e-value: 1.8E-5

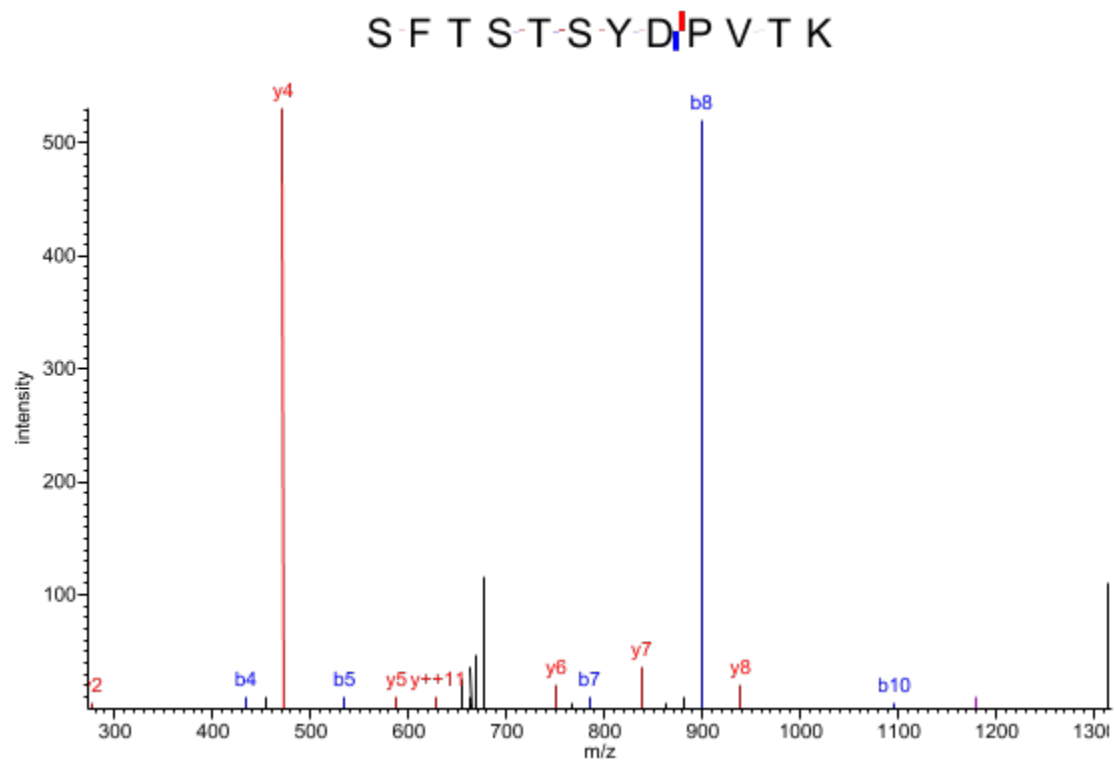

Peptide: AAVALGpSPAPHQPGQEENK  
Protein: tr|B4G0R6|B4G0R6\_MAIZE; S91  
e-value: 1.4E-13

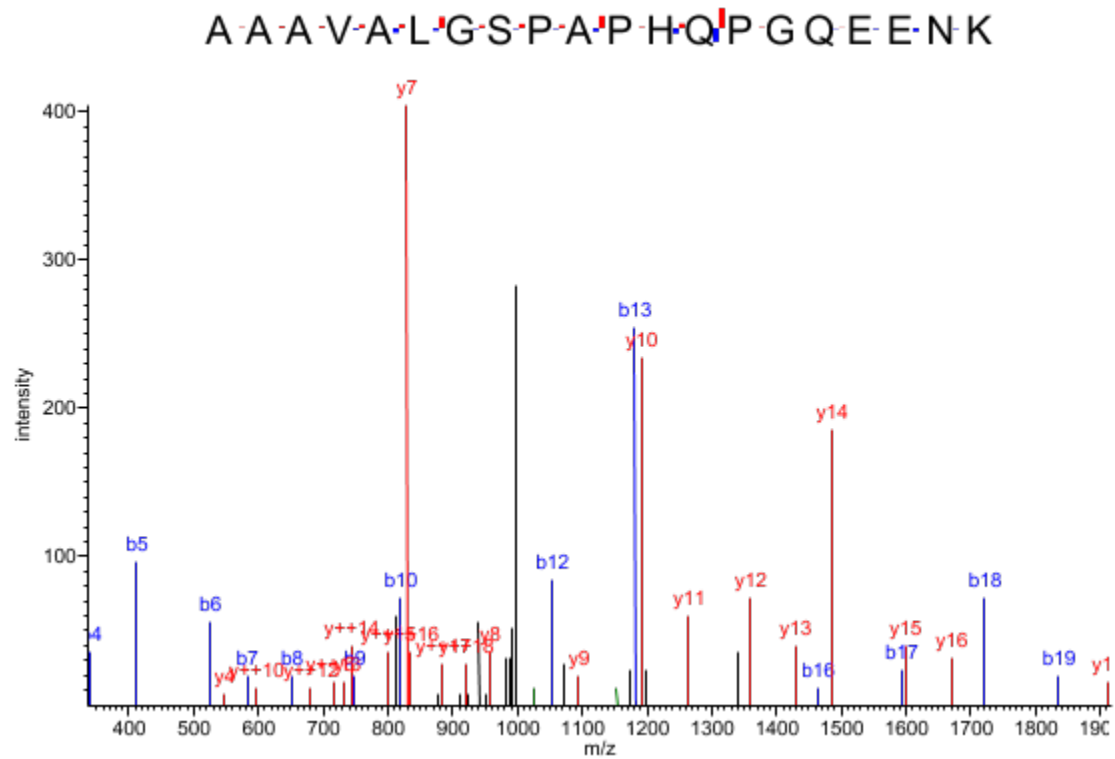

Peptide: GADFpSALPPDLVHRALAAACASDVAAASR

Protein: GRMZM2G133016\_P01; S620, S643

e-value: 4E-3

G A D F S A L P P D L V H R A L A A A C A S D V A A A S R

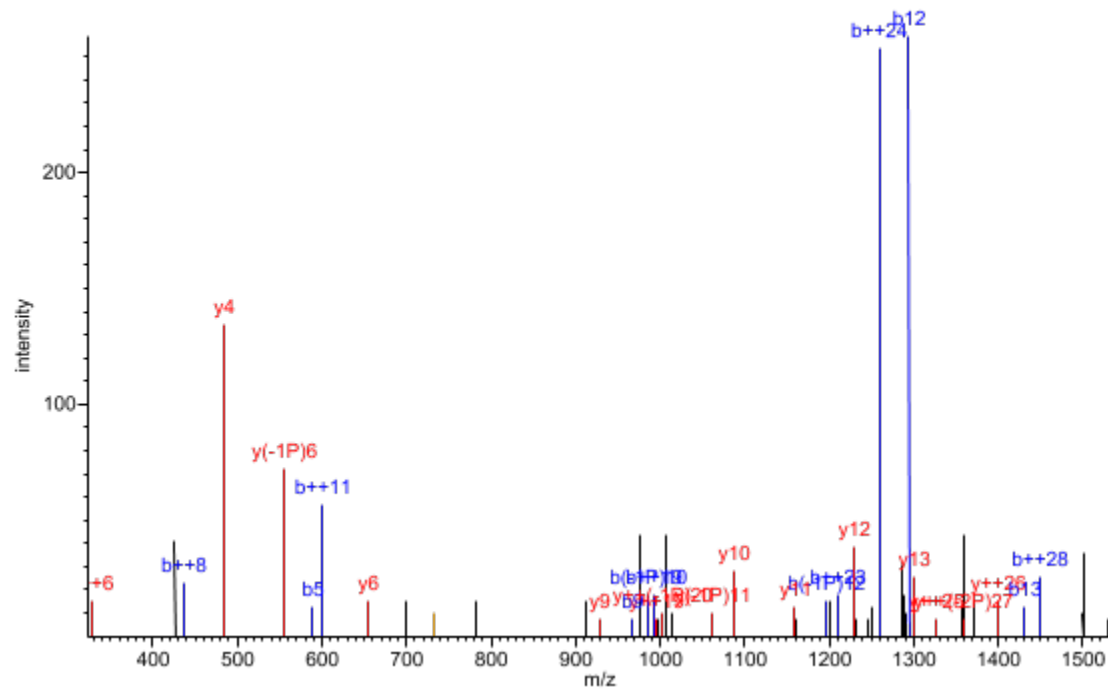

Peptide: SPATIAPAAGpSPR

Protein: tr|B6TEF3|B6TEF3\_MAIZE; S17

e-value: 3.7E-7

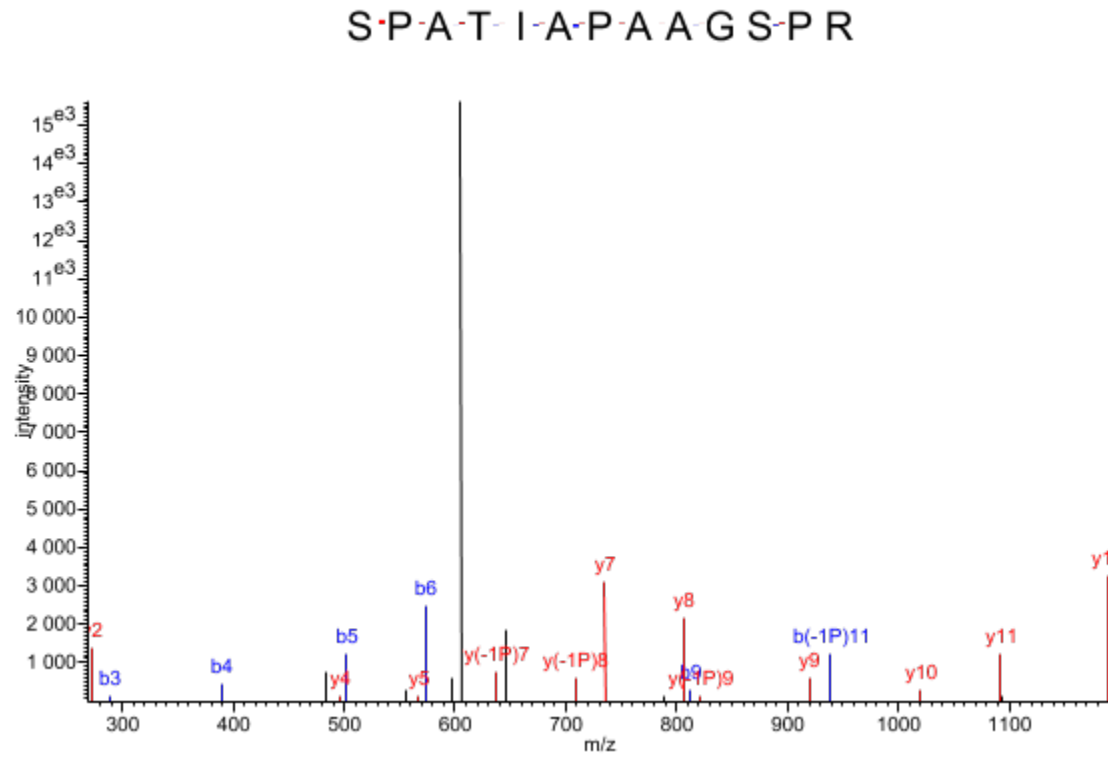

Peptide: GETLDTSP-LPGSDSFEANR  
Protein: GRMZM2G172138\_P01; S335  
e-value: 1E-5

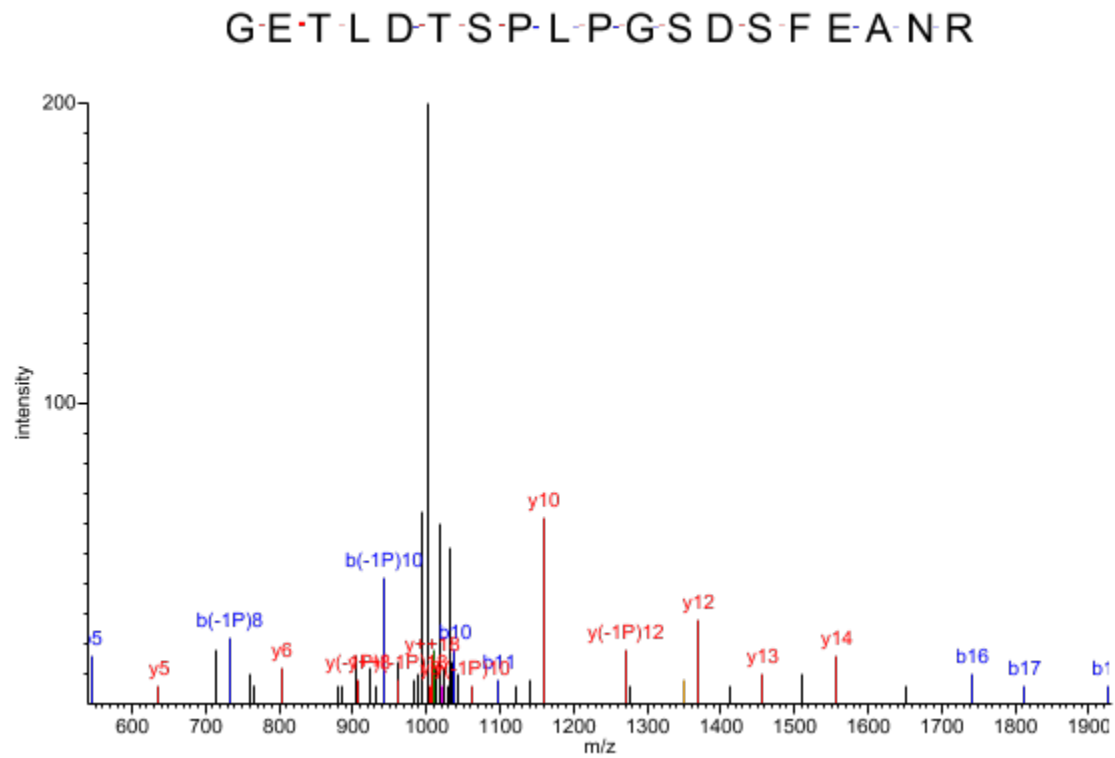



Peptide: LAADNAGDTEApSPR  
Protein: tr|B4FKV2|B4FKV2\_MAIZE; S310  
e-value: 6.2E-9

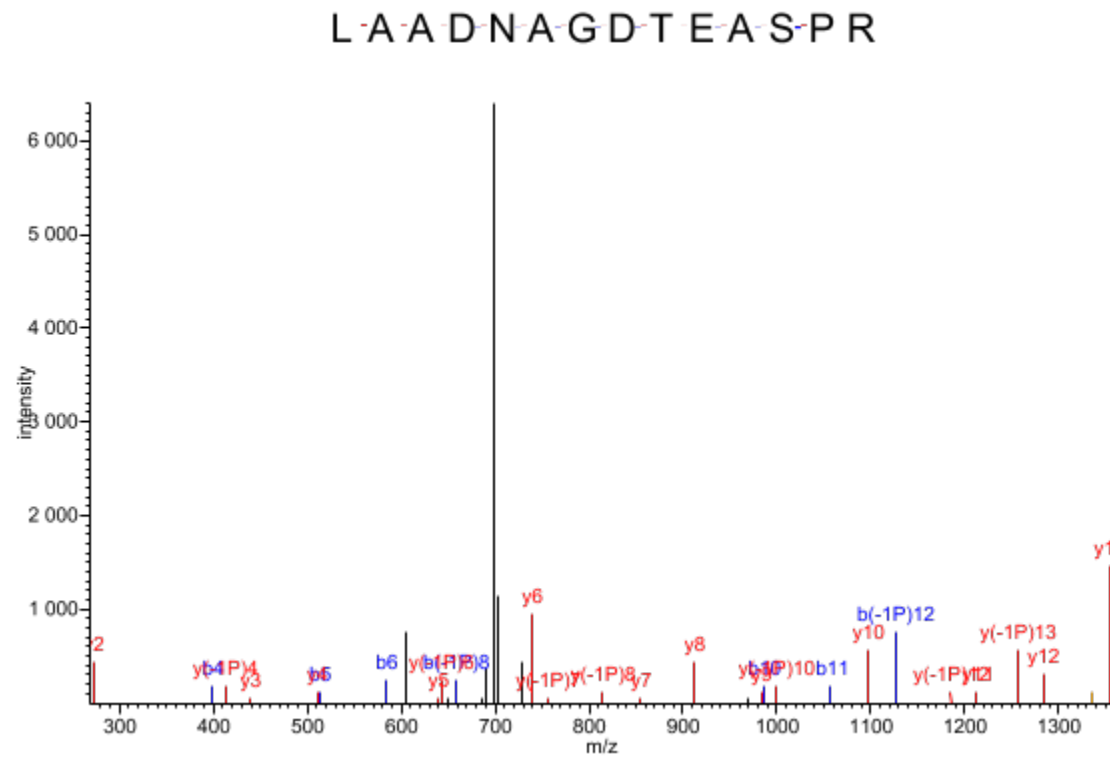

Peptide: TTpSSNSLNSGATTR  
Protein: tr|C0P3S0|C0P3S0\_MAIZE; S171  
e-value: 4E-10

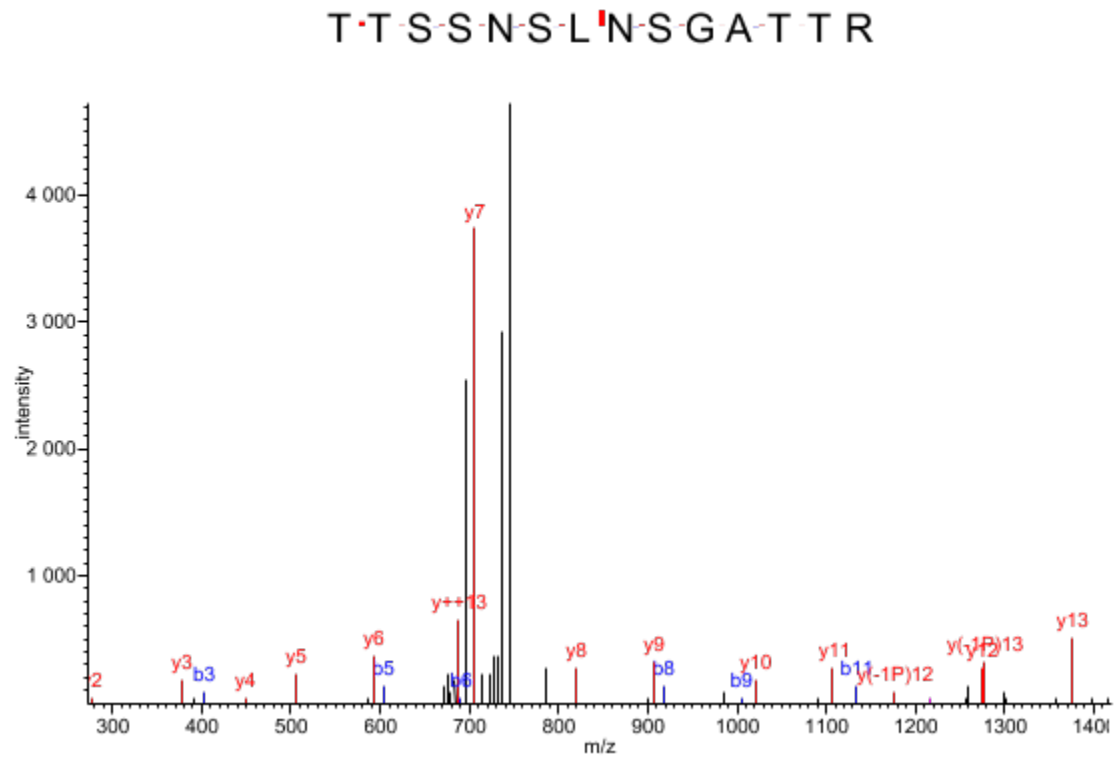

Peptide: Sp(SS)LEDDPYFSYPNLFSA PKP  
Protein: GRMZM2G106590\_P01; S371/S372  
e-value: 6.8E-14

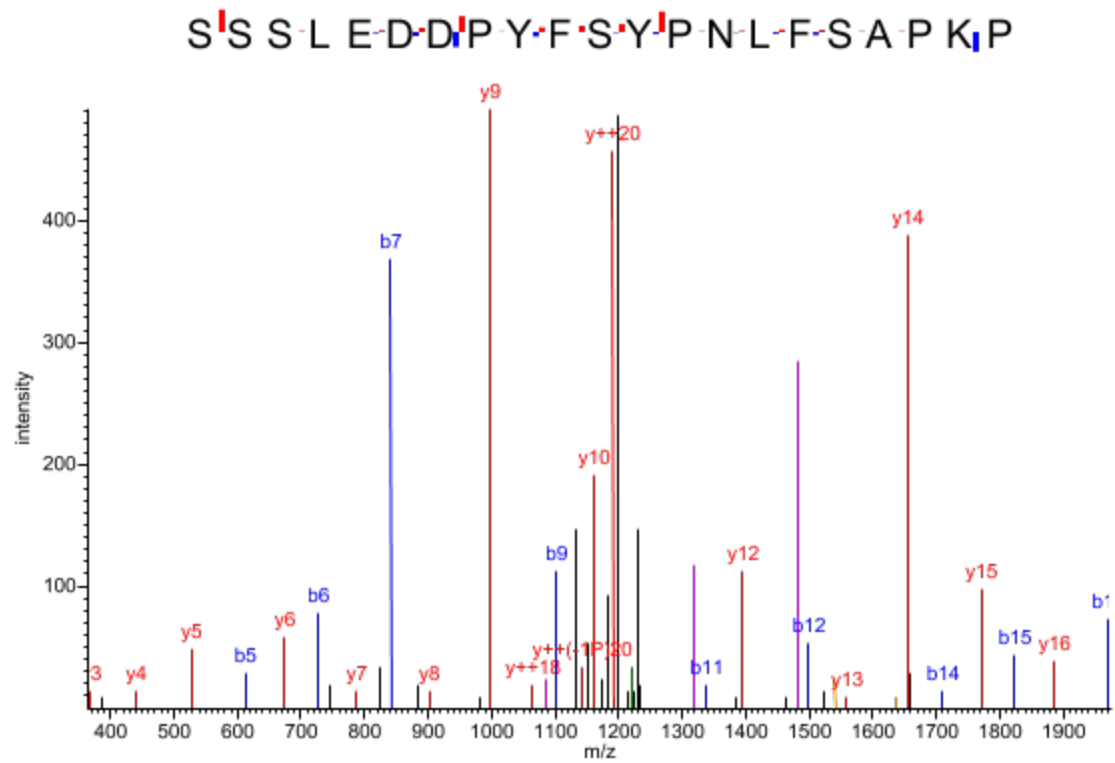

Peptide: Ap(SS)WSGTYPEQLSSTAASR

Protein: tr|C0PDZ9|C0PDZ9\_MAIZE; S349/S350

e-value: 1.3E-12

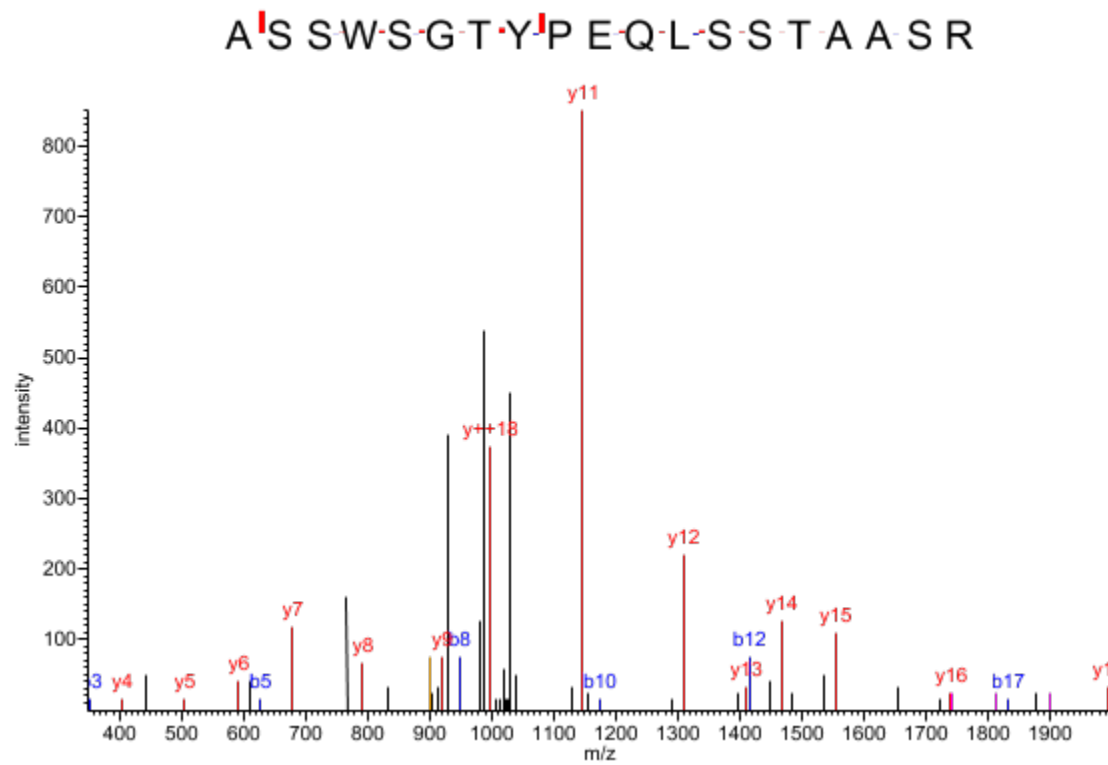

Peptide: SpSEPIVLPK

Protein: GRMZM2G101760\_P01; S177

e-value: 7.2E-4

S·S·E·P·I·V·L·P·K

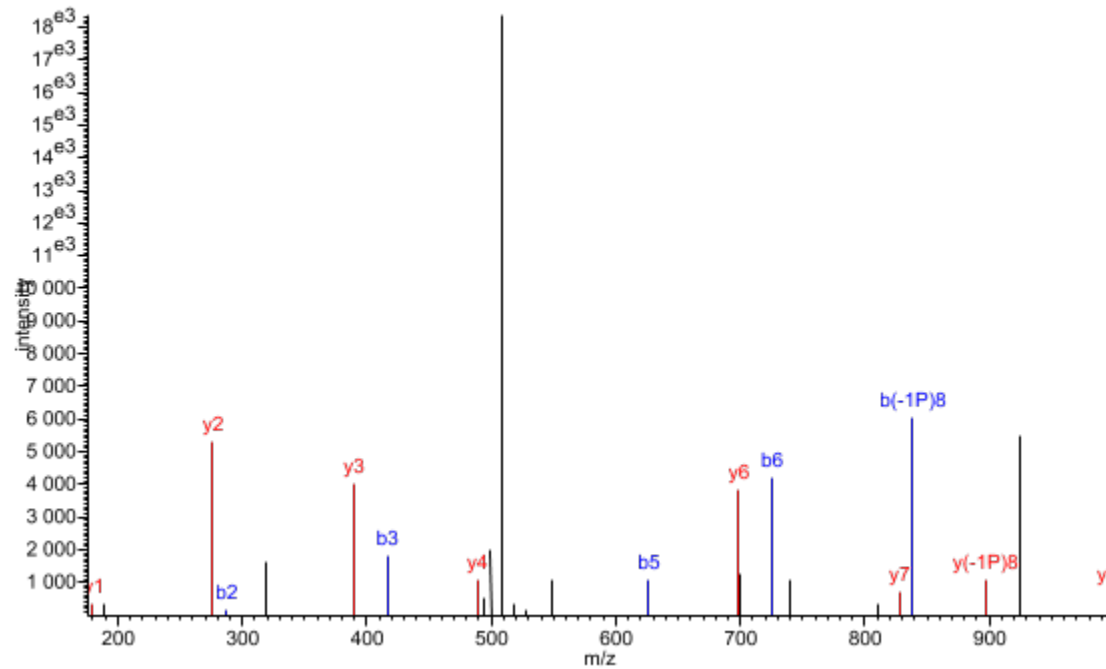

Peptide: TSpSYPQQPLQHR

Protein: GRMZM2G101760\_P01; S166

e-value: 1.3E-4

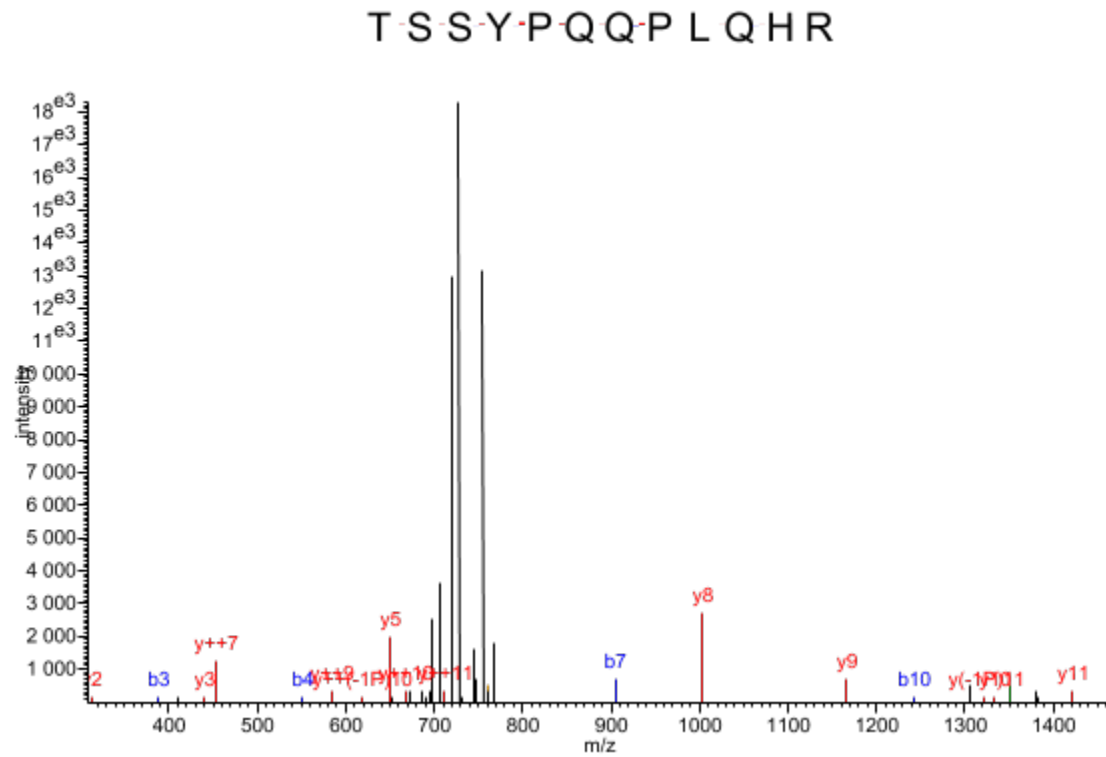

Peptide: p(SPTTT)TTTTTTAIQSTIQSIK  
Protein: GRMZM2G152768\_P01; S19/T21/T23  
e-value: 1.5E-13

S P T T T T T T T T T T A I Q S T I Q S I K

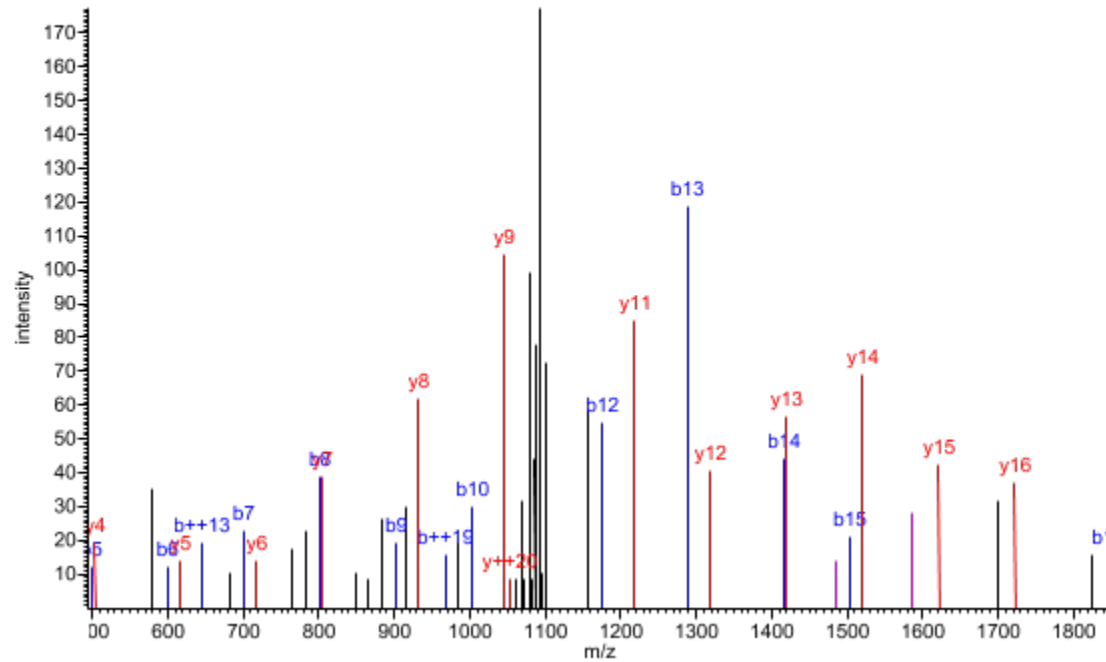

Peptide: GApSPAAAAAVQVR  
Protein: GRMZM2G420789\_P01; S7  
e-value: 1E-8

G A S P A A A A A V Q V R

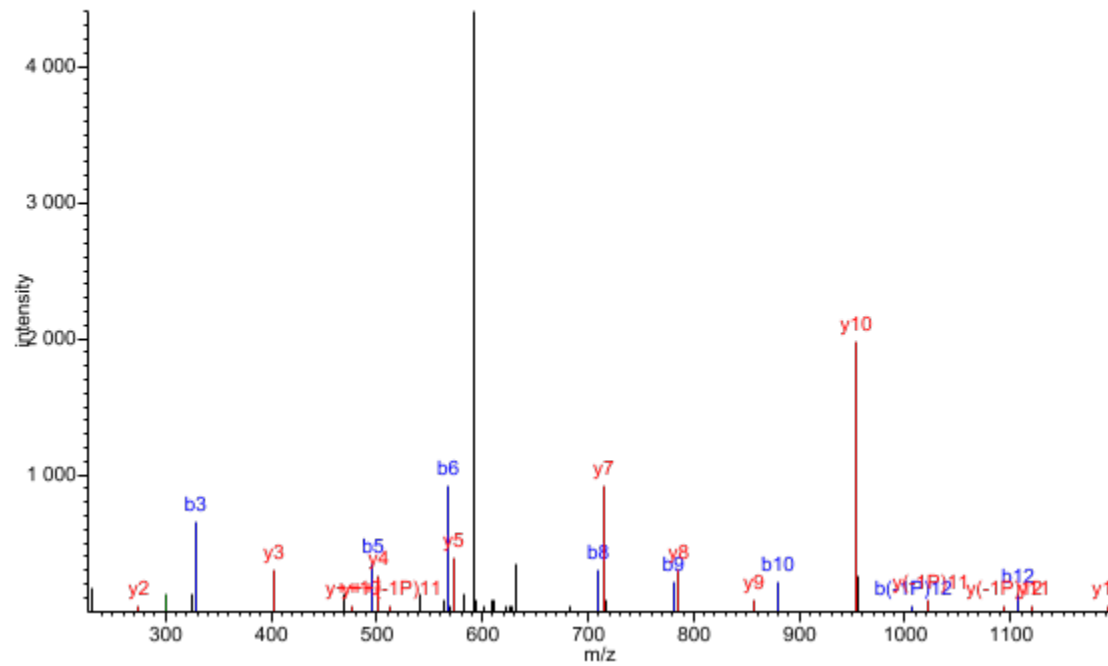



Peptide: AQDDIP~~E~~SSA~~S~~G~~S~~P~~T~~S~~S~~T~~P~~A~~A~~R

Protein: GRMZM2G045503\_P01; S14

e-value: 2.2E-11

A Q D D I P E S S A S G S P T S S T P A A R

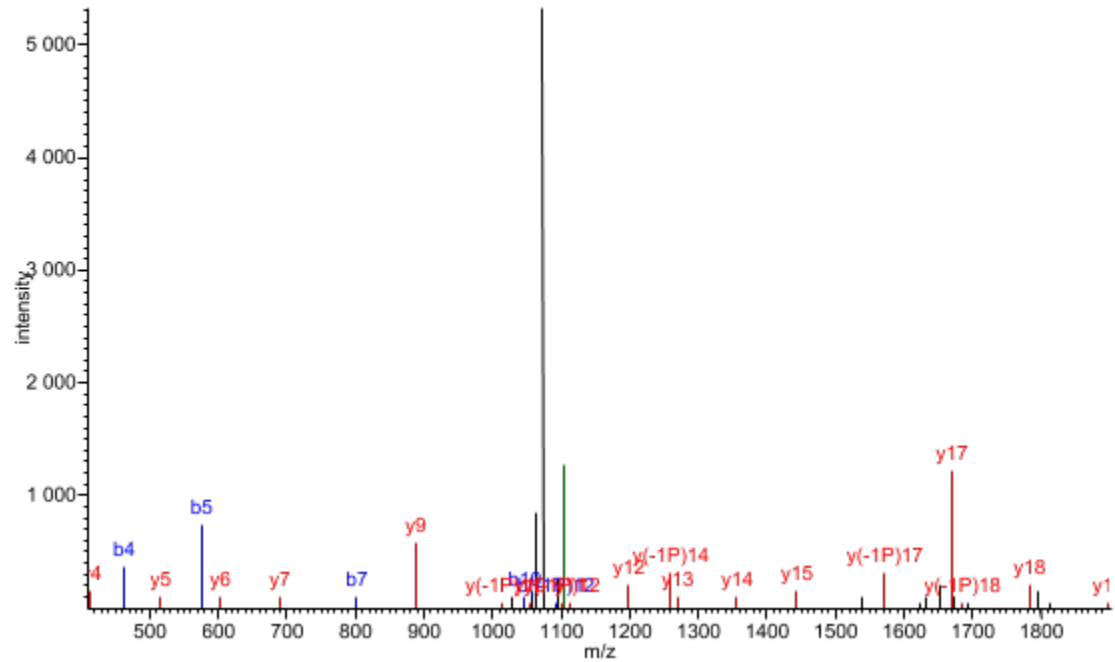

Peptide: LSEDATTTVpSPSK  
Protein: GRMZM2G021015\_P01; S153  
e-value: 1.6E-7

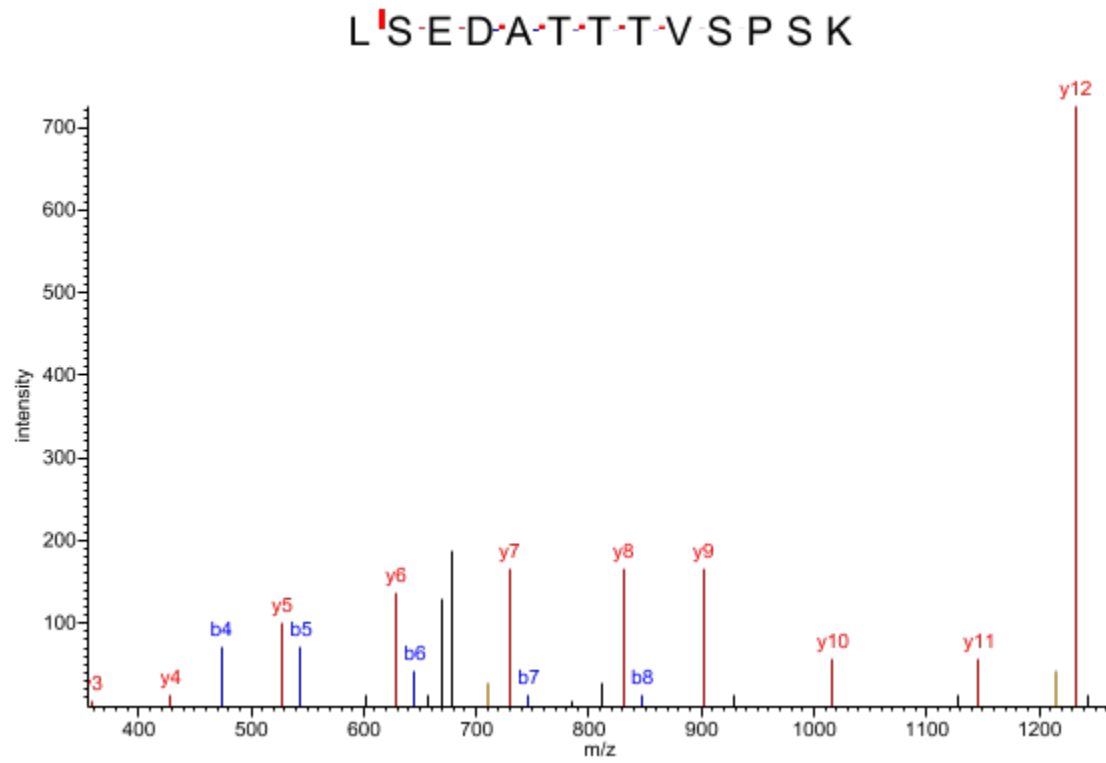

Peptide: NPPTESLEpSEDEDGFPVSFSESK

Protein: GRMZM2G024811\_P02; S190

e-value: 2.1E-6

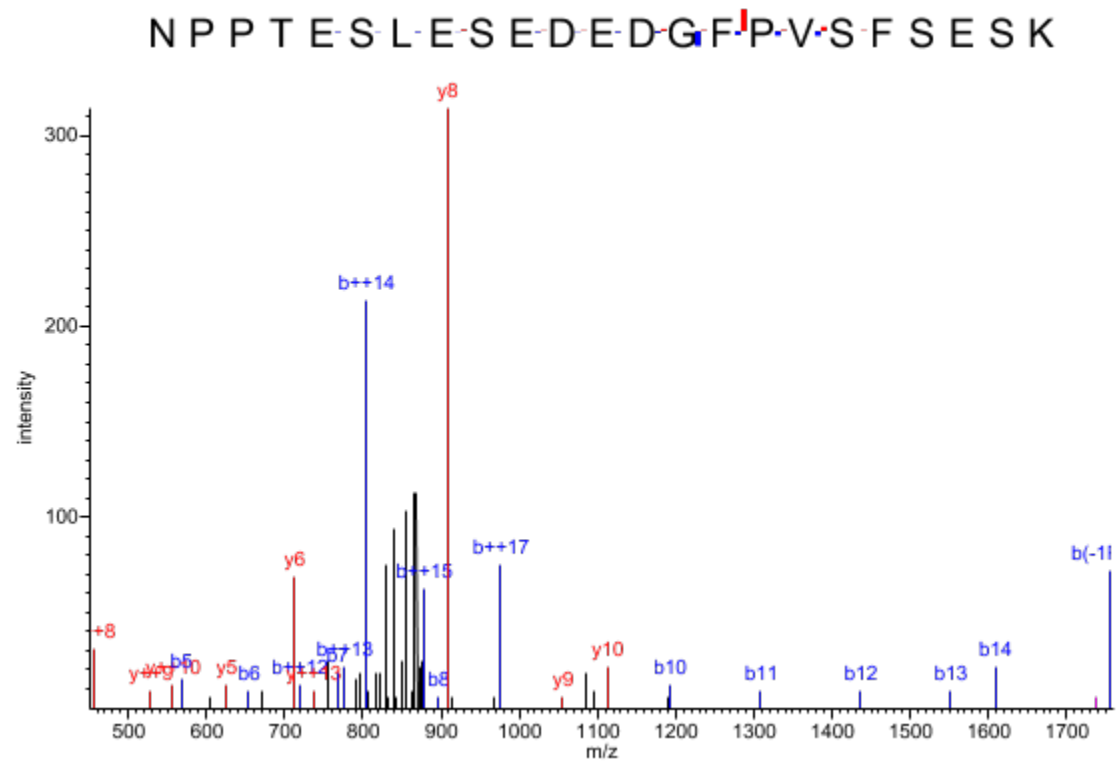

Peptide: AAVEPDQSPITQPGAADASPSR

Protein: tr|B4FF32|B4FF32\_MAIZE; S326

e-value: 1.7E-14

A A V E P D Q S P I T Q P G A A D A S P S R

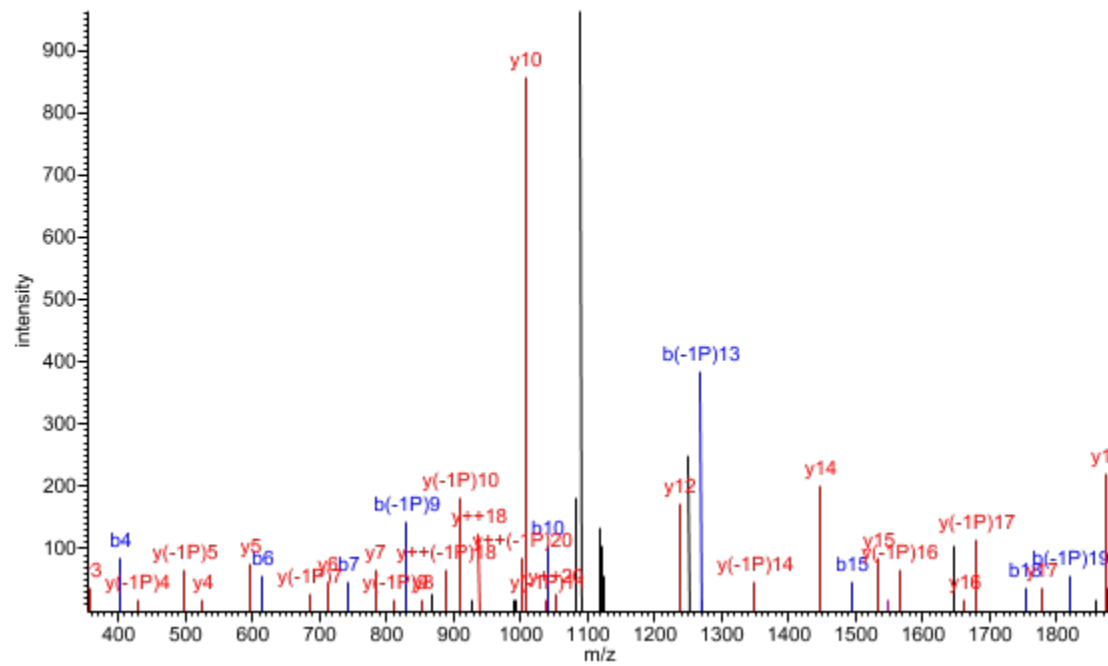

Peptide: TPpSPIPPVAVEPPADR  
Protein: GRMZM2G126266\_P02; S167  
e-value: 9.4E-8

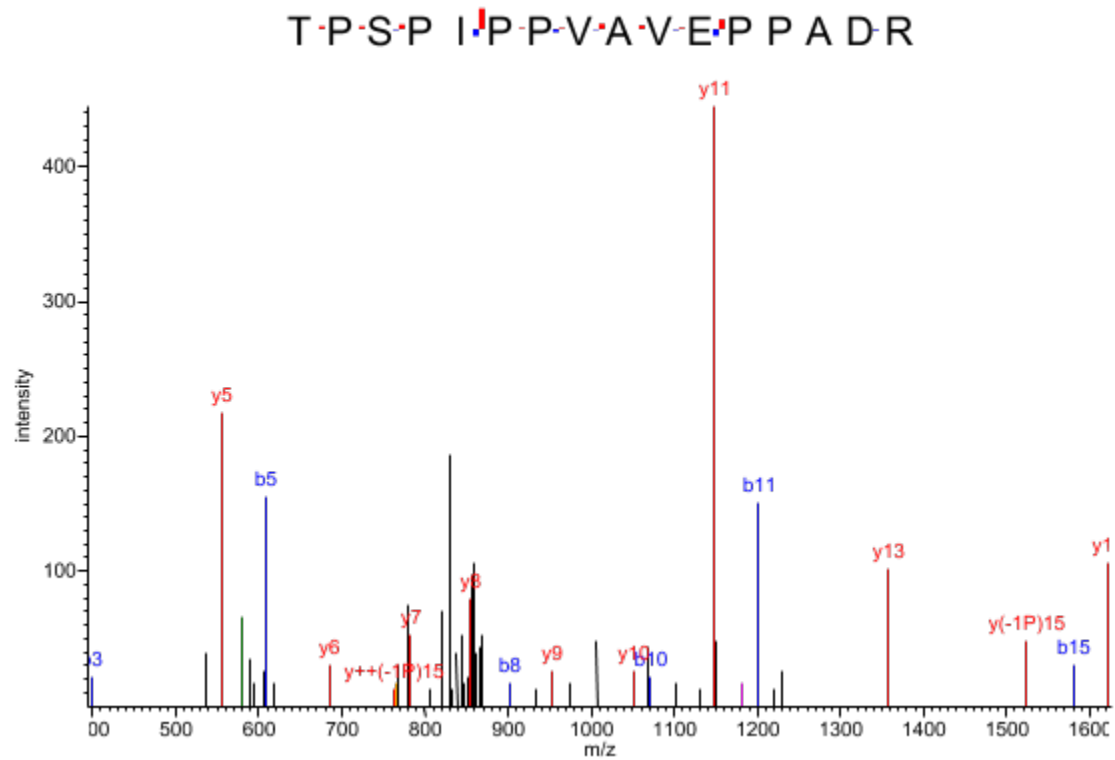

Peptide: ApSSSSTSAADPNPNK  
Protein: tr|B6THW0|B6THW0\_MAIZE; S35  
e-value: 2.7E-6

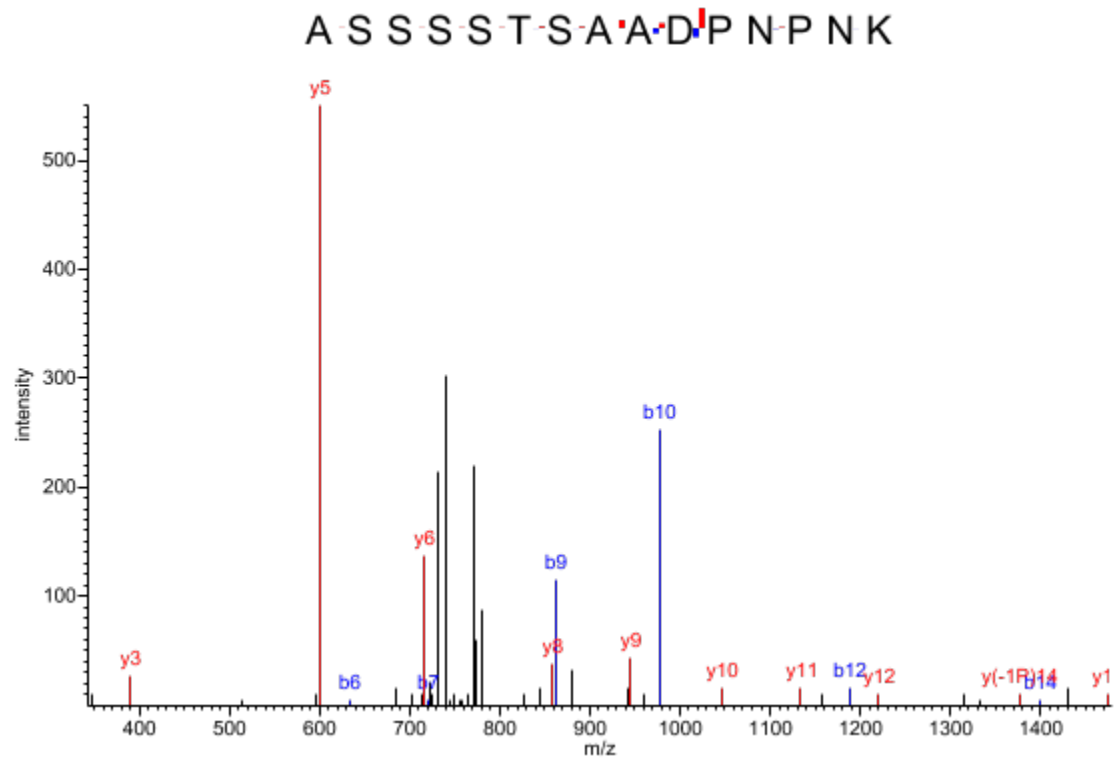

Peptide: GAAPVRPApSHEGR

Protein: tr|C0PF30|C0PF30\_MAIZE; S220

e-value: 2E-6

G-A-A-P-V-R-P-A-S-H-E-G-R

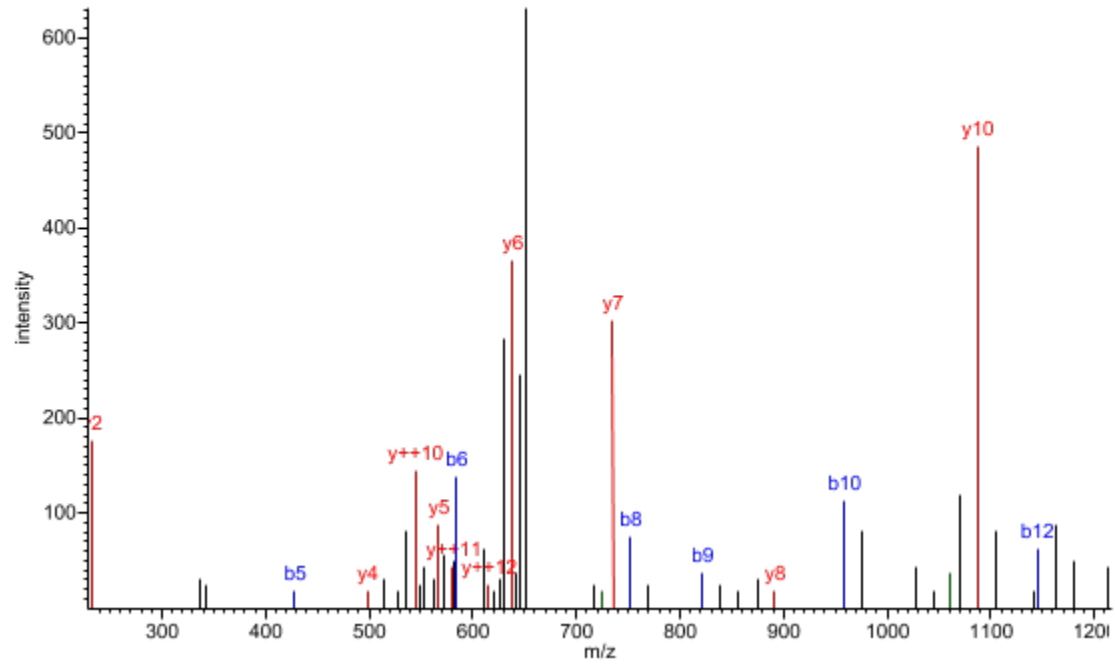

Peptide: SpSPSHAASPEFEFWMVGR

Protein: GRMZM2G030038\_P01; S25

e-value: 1.5E-7

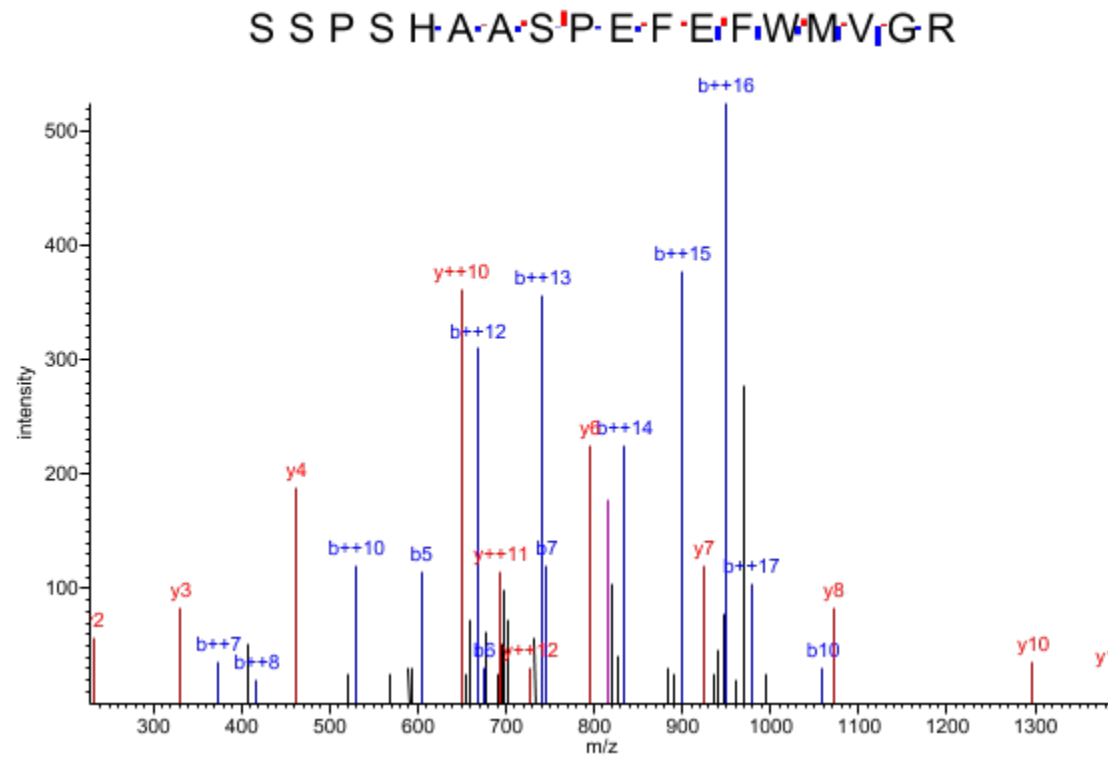



Peptide: GGpTEEDDEP VVVVAK  
Protein: GRMZM2G354053\_P01; T665  
e-value: 4.1E-12

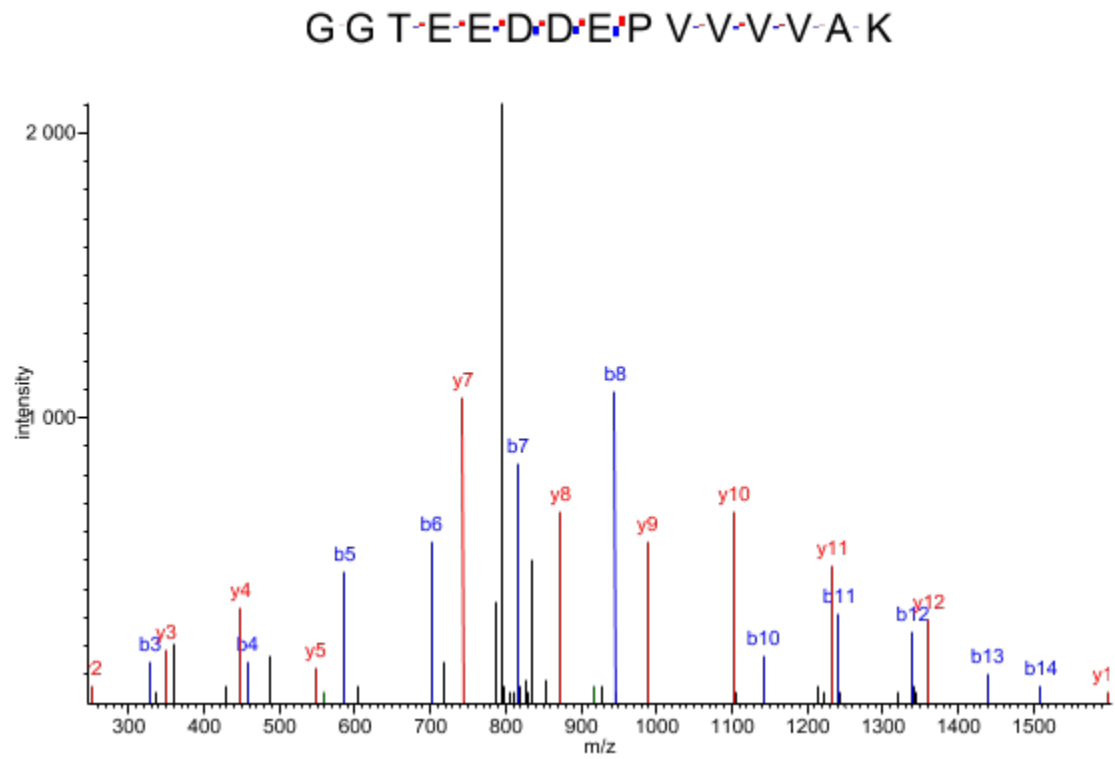

Peptide: p(SYS)ASYAASYGPTLADTGGQLK  
Protein: tr|B6SS45|B6SS45\_MAIZE; S89/Y90/S91  
e-value: 2.8E-17

S Y S A S Y A A S Y G P T L A D T G G Q L K

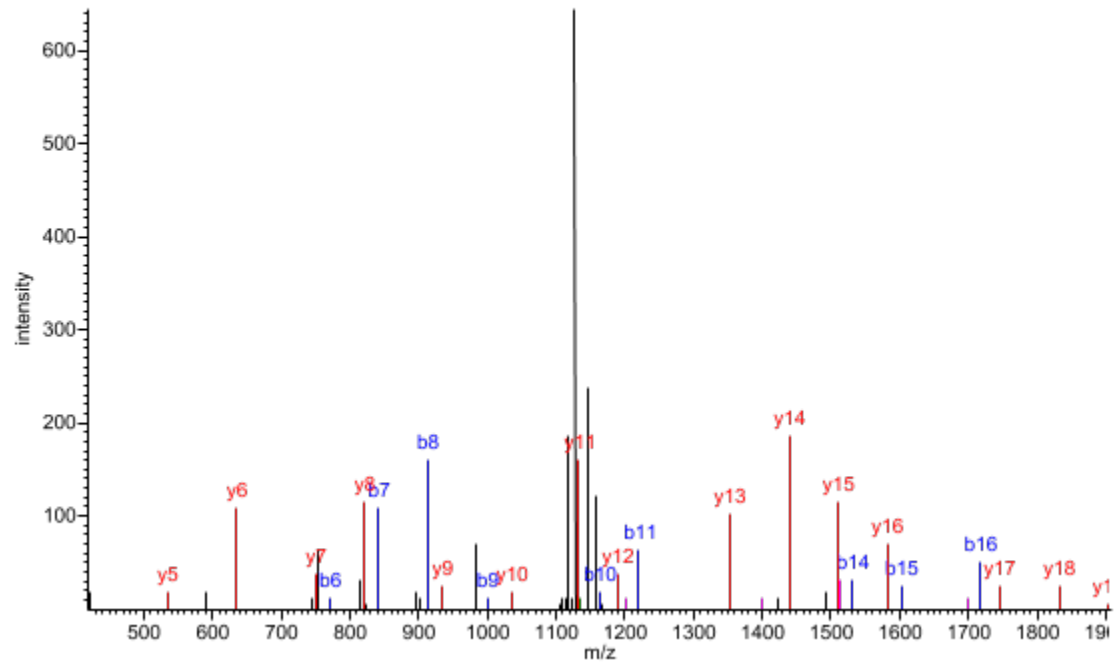

Peptide: EDGpSPTEEAEEVEDDGELPAMK

Protein: tr|B4FUX9|B4FUX9\_MAIZE; S68

e-value: 1.1E-15

E D G S P T E E A E E V E D D G E L P A M K

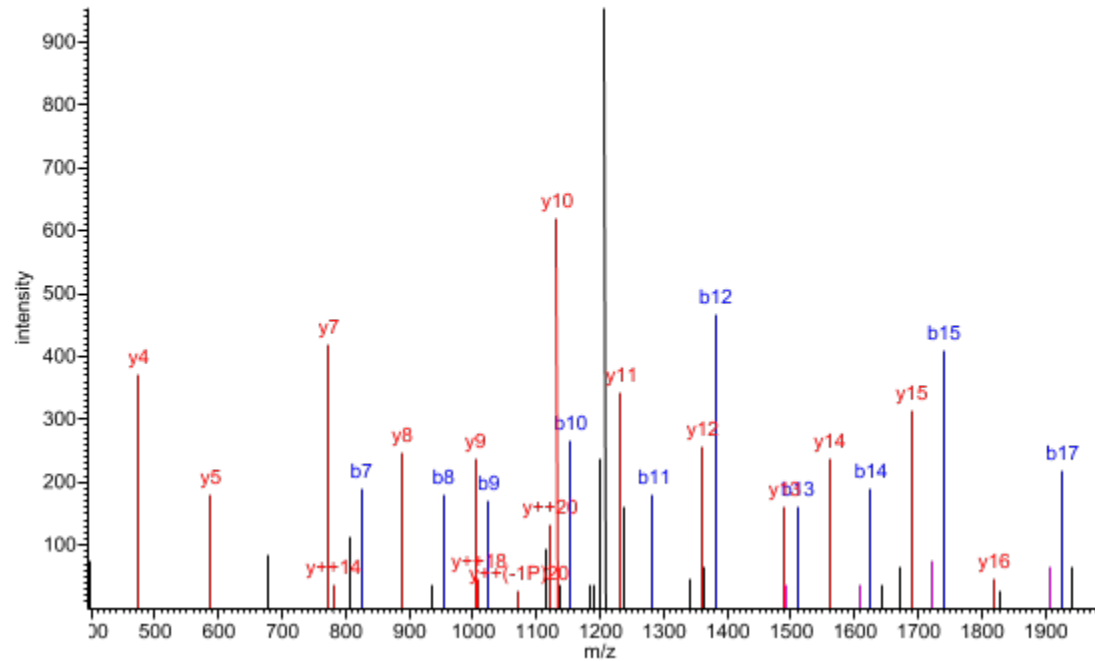

Peptide: AAATQNPAAGYLpSR  
Protein: tr|C0P2X8|C0P2X8\_MAIZE; S50  
e-value: 9.8E-10

A·A·A·T·Q·N·P·A·A·G·Y·L·S·R

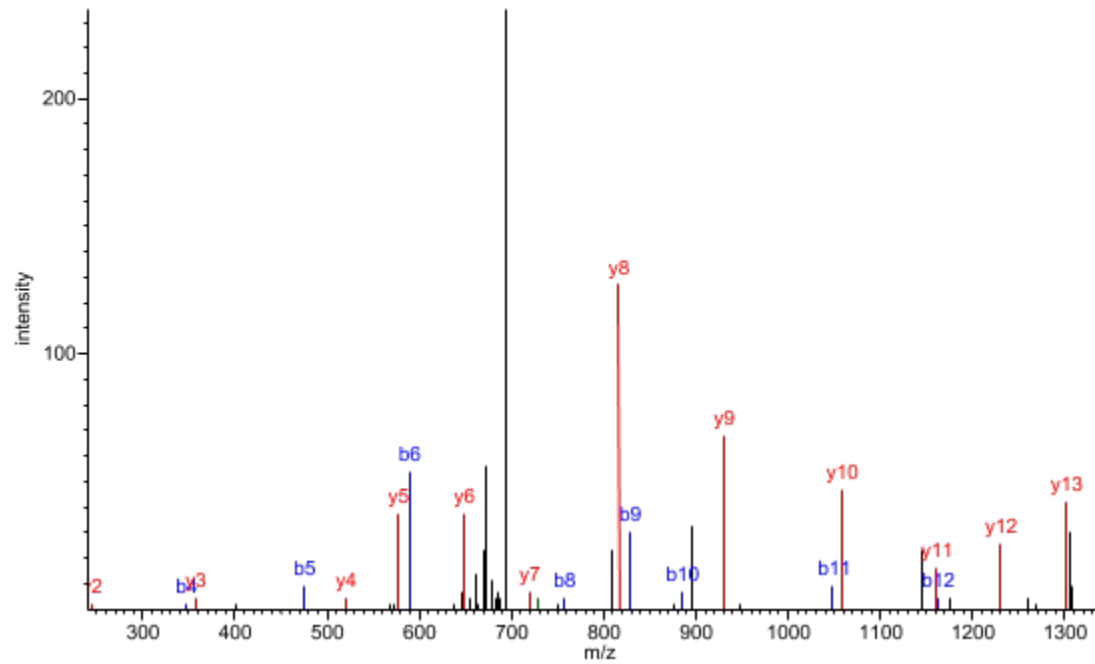

Peptide: AMpSVAAAVASR

Protein: tr|B6SP75|B6SP75\_MAIZE; S66

e-value: 1E-6

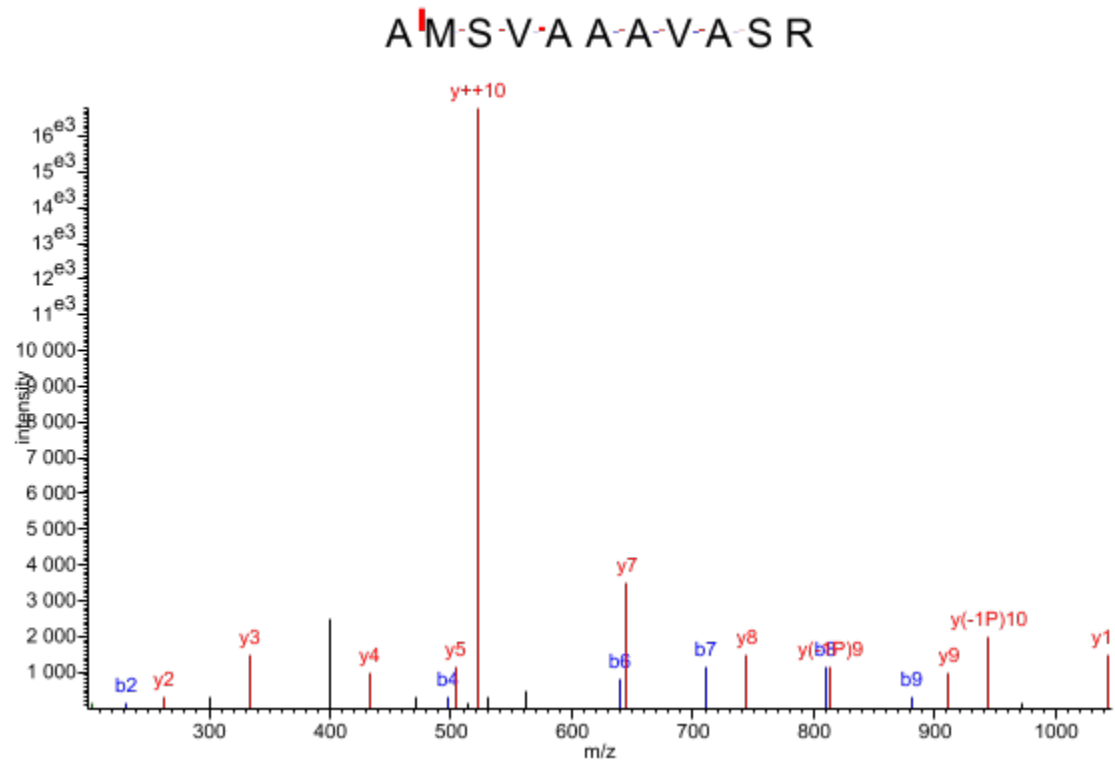

Peptide: DVApSDGDEAESTGIVIR  
Protein: tr|B8A0H2|B8A0H2\_MAIZE; S127  
e-value: 8.2E-13

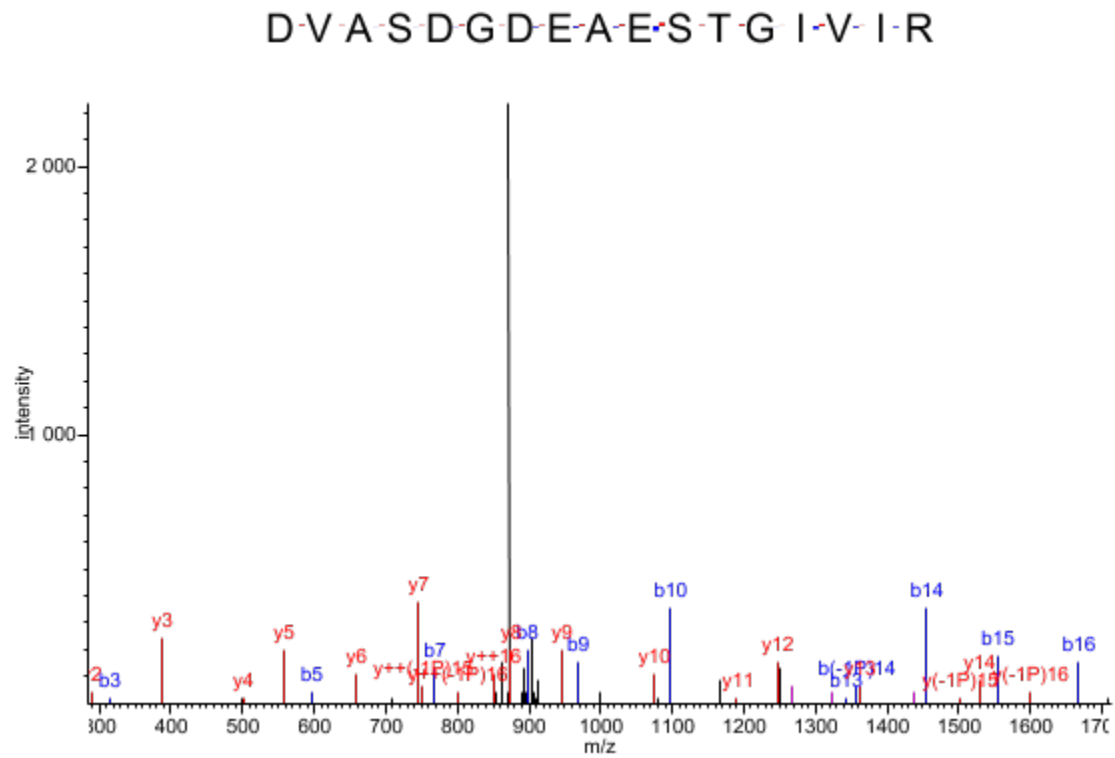

Peptide: GAVYYVQpSPSR

Protein: tr|B6U4P1|B6U4P1\_MAIZE; S34

e-value: 8.7E-7

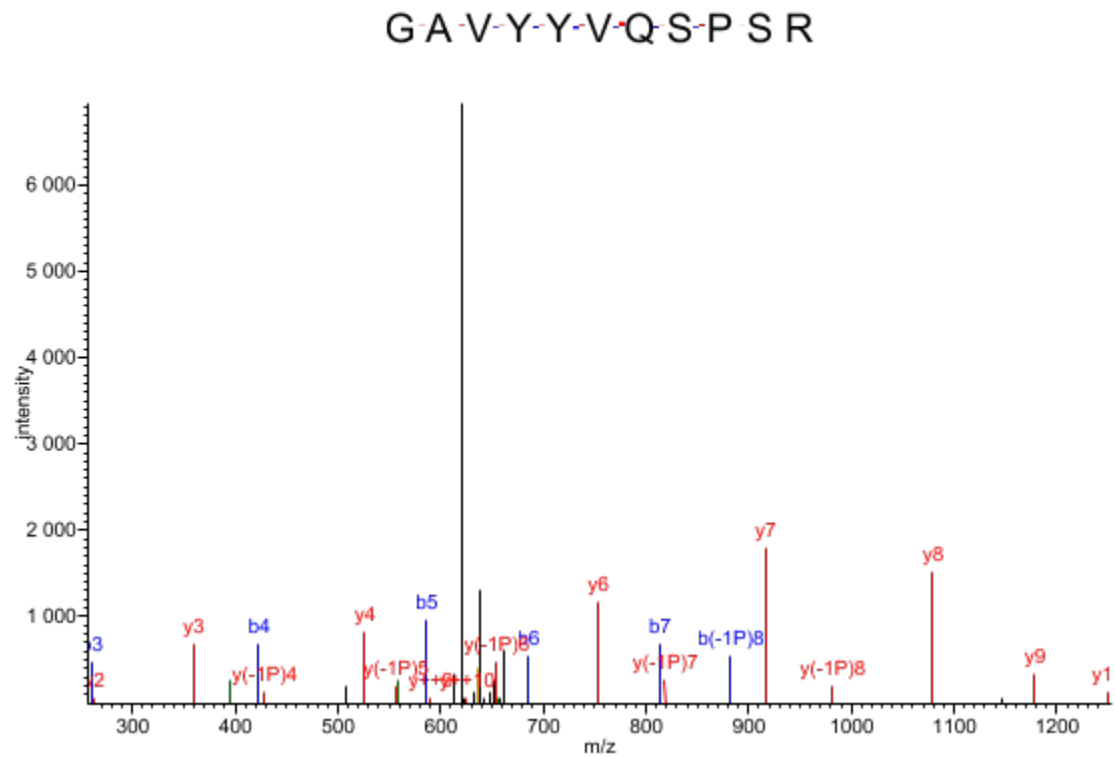

Peptide: HPpSRPEPSIPAPEPPPPQPPPPAAEELpTEAGTEERK

Protein: GRMZM2G449274\_P01; S163, T188

e-value: 6.1E-3

S-R-P-E-P-S-I-P-A-P-E-P-P-P-Q-P-P-P-P-A-A-E-E-L-T-E-A-G-T

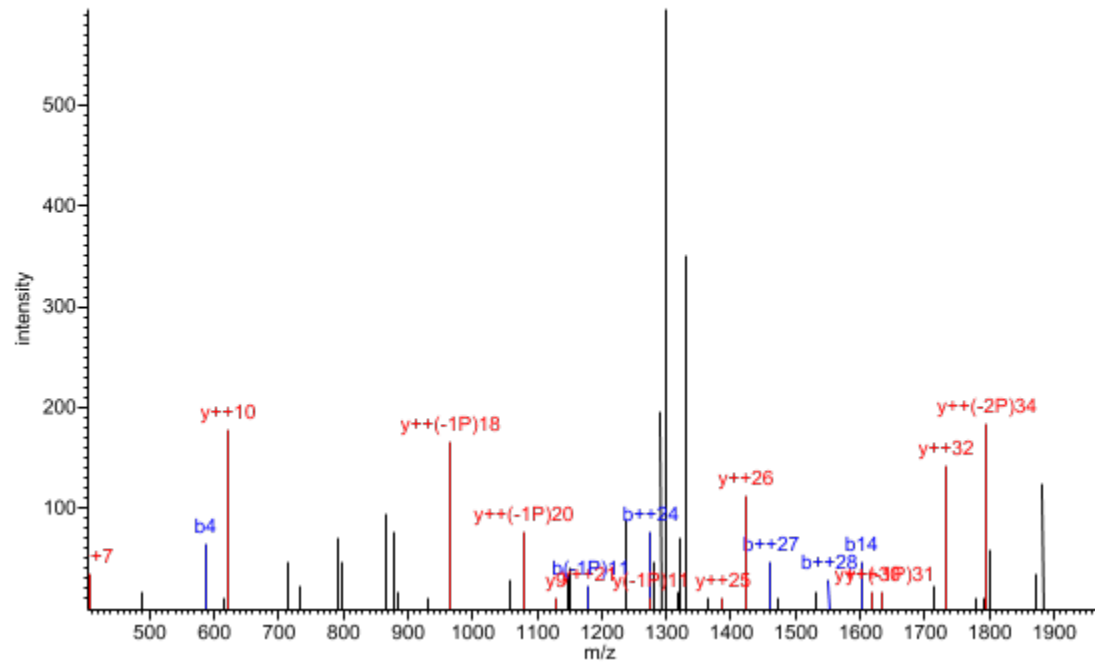



Peptide: SFp(SS)ASSAGHSHGGGGGAK  
Protein: tr|B4FV35|B4FV35\_MAIZE; S46/S47  
e-value: 9.1E-7

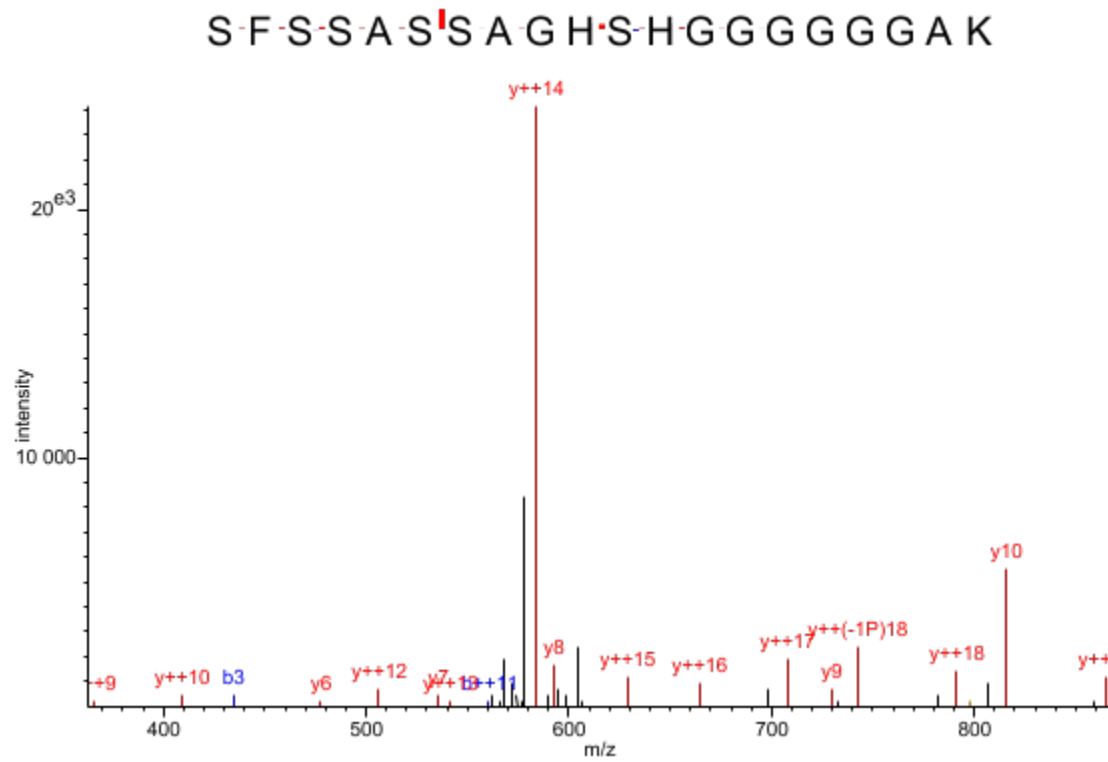

Peptide: TGTPQSDVKNpSPK  
Protein: GRMZM2G041876\_P01; S717  
e-value: 8.5E-5

T-G-T-P-Q-S-D-V-K-N-S-P-K

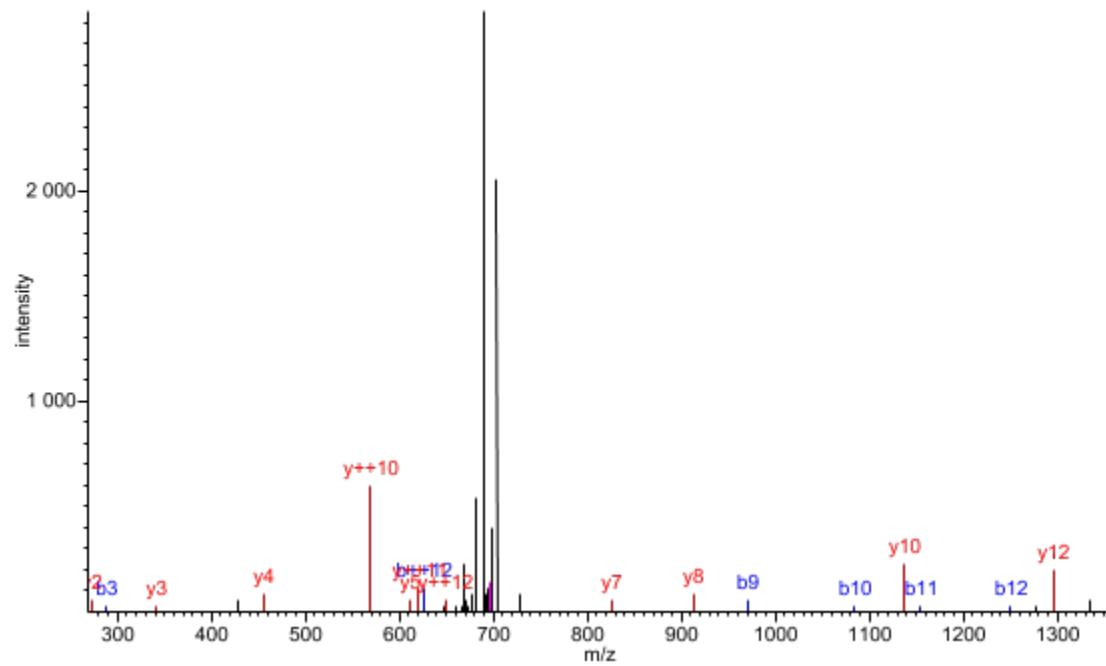

Peptide: AATSVHSTPALpSPMApSPR  
Protein: tr|B6U4P1|B6U4P1\_MAIZE; S58, S62  
e-value: 4.9E-6

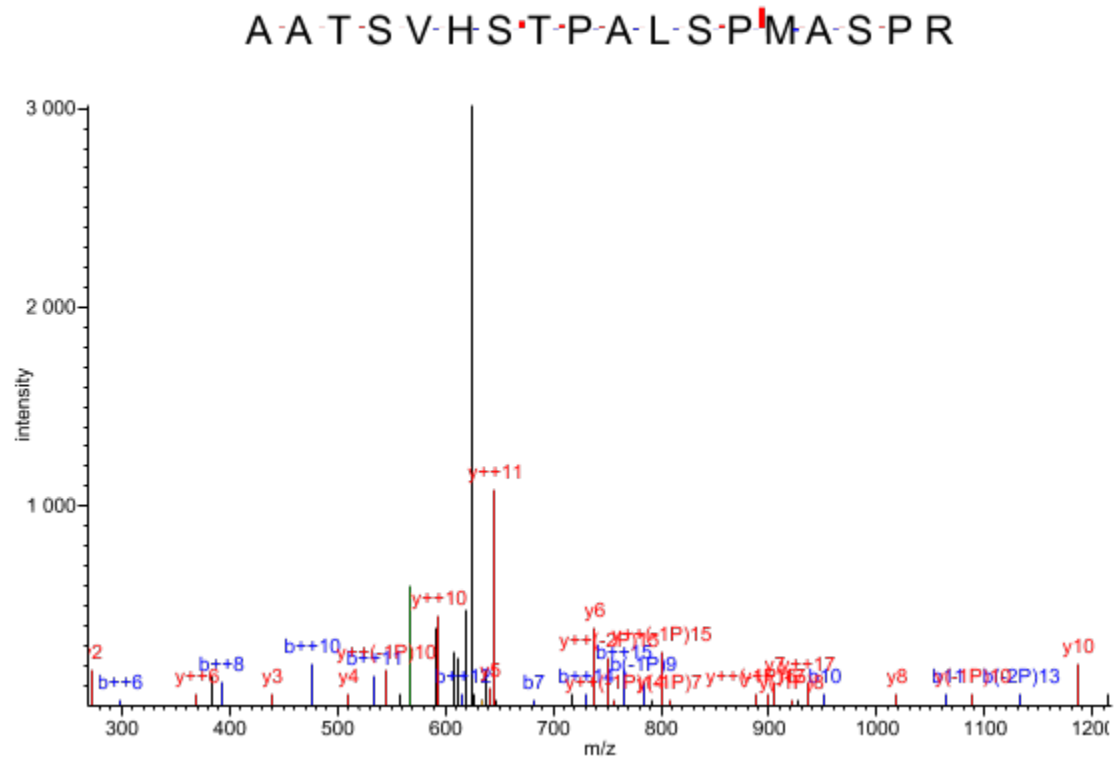

Supplement: supp_M111.015867_mcp.M111.015867-1.pdf [file supp_M111.015867_mcp.M111.015867-1.pdf]
