# Supplementary material
Source: PubMed Central journal article supplement (PMC3494150)

## Supplemental Information

### **Phosphoproteome dynamics upon changes in plant water status reveal early events associated with rapid growth adjustment in maize leaves**

Ludovic Bonhomme, Benoît Valot, François Tardieu and Michel Zivy

**Supplemental Fig. S6. Relative abundances of the 132 significantly changed phosphorylation sites.** Bars show mean values  $\pm$  SEM computed for each treatment.

### Putative uncharacterized protein # S171

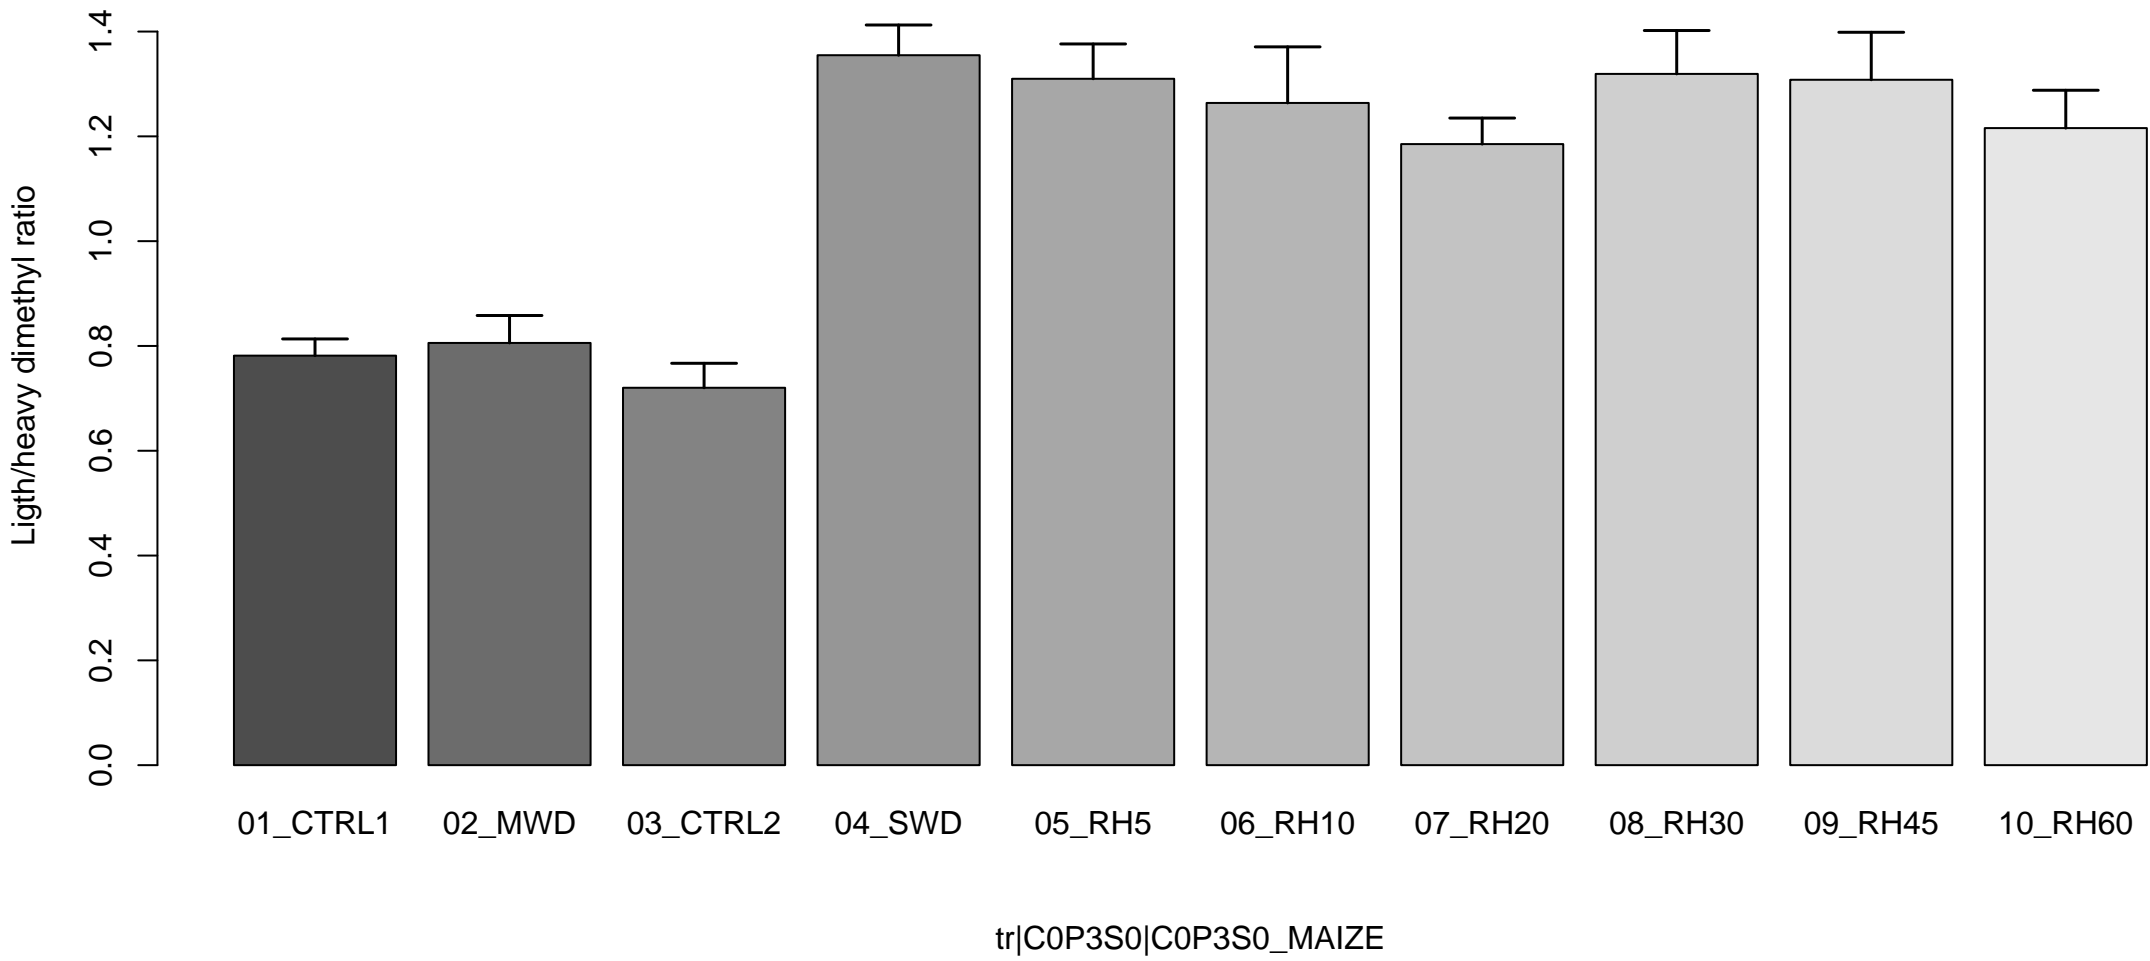

### High mobility group I/Y-2 # S155/S157

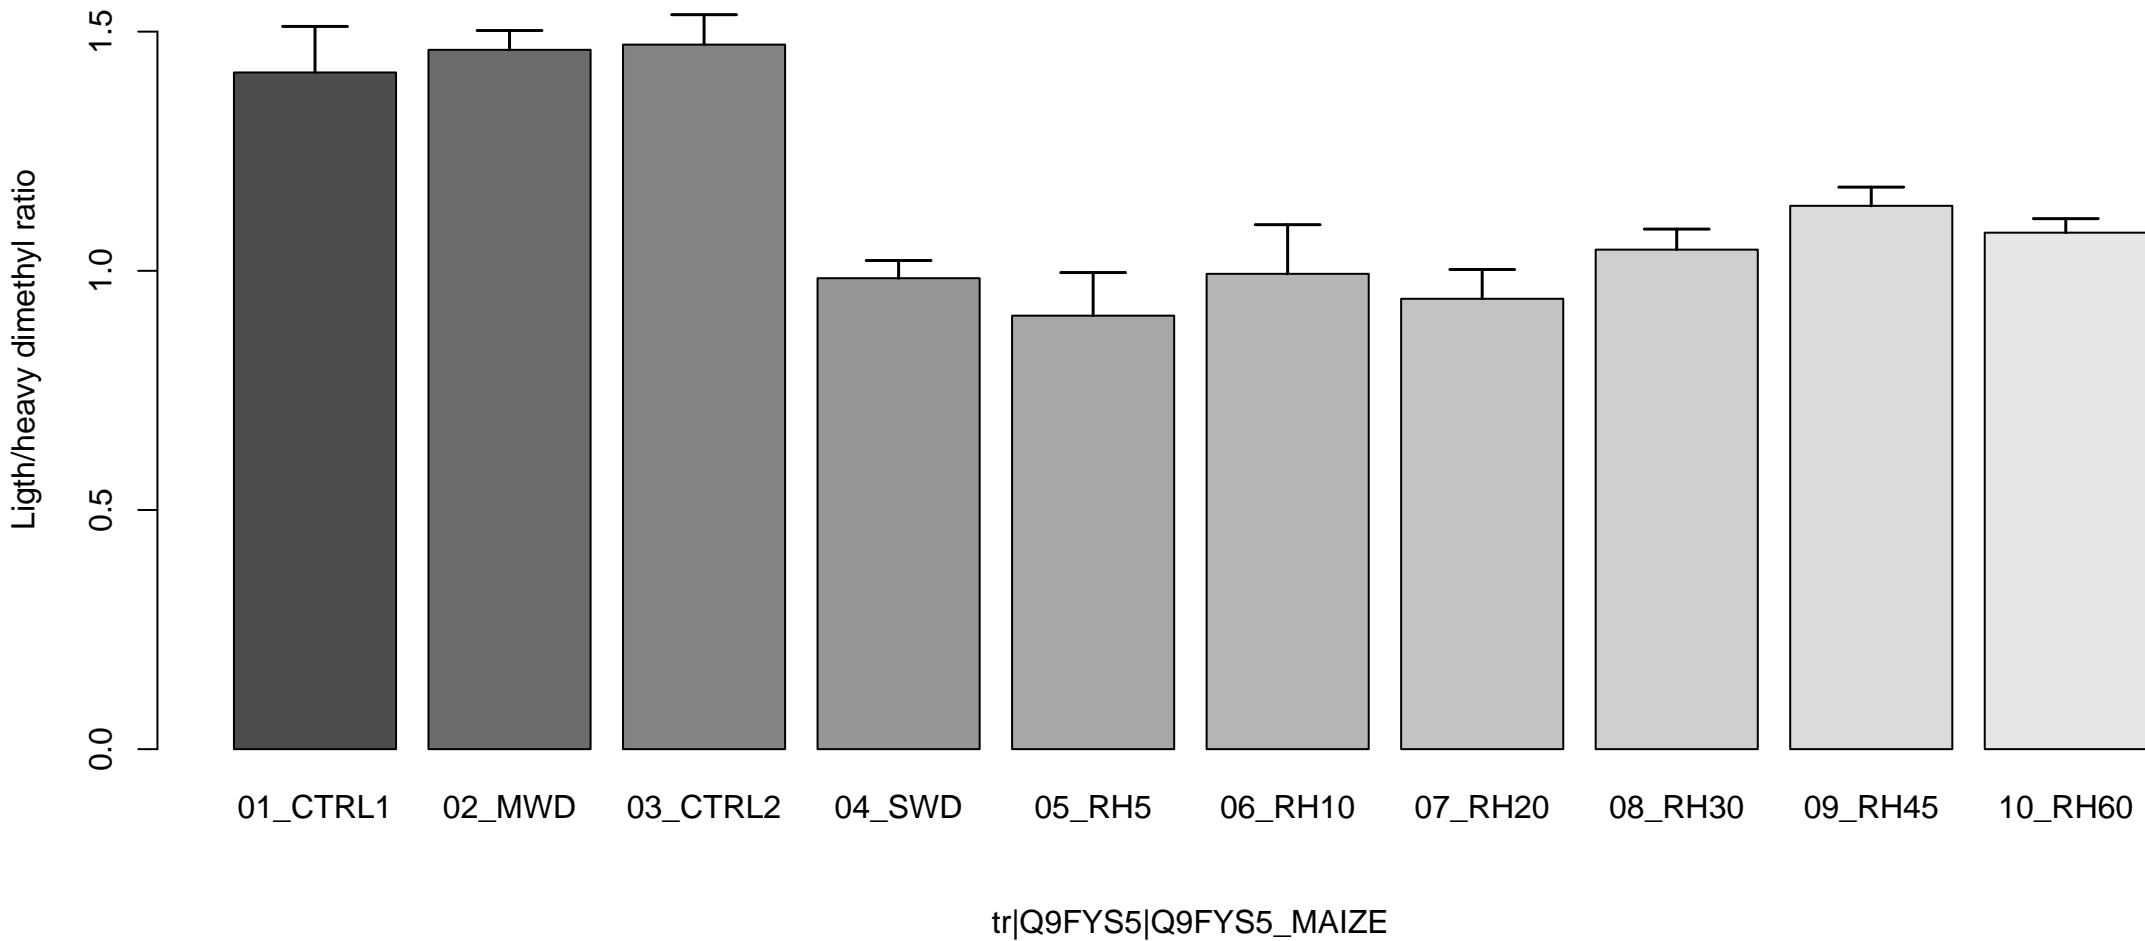

# GIF2 # S212

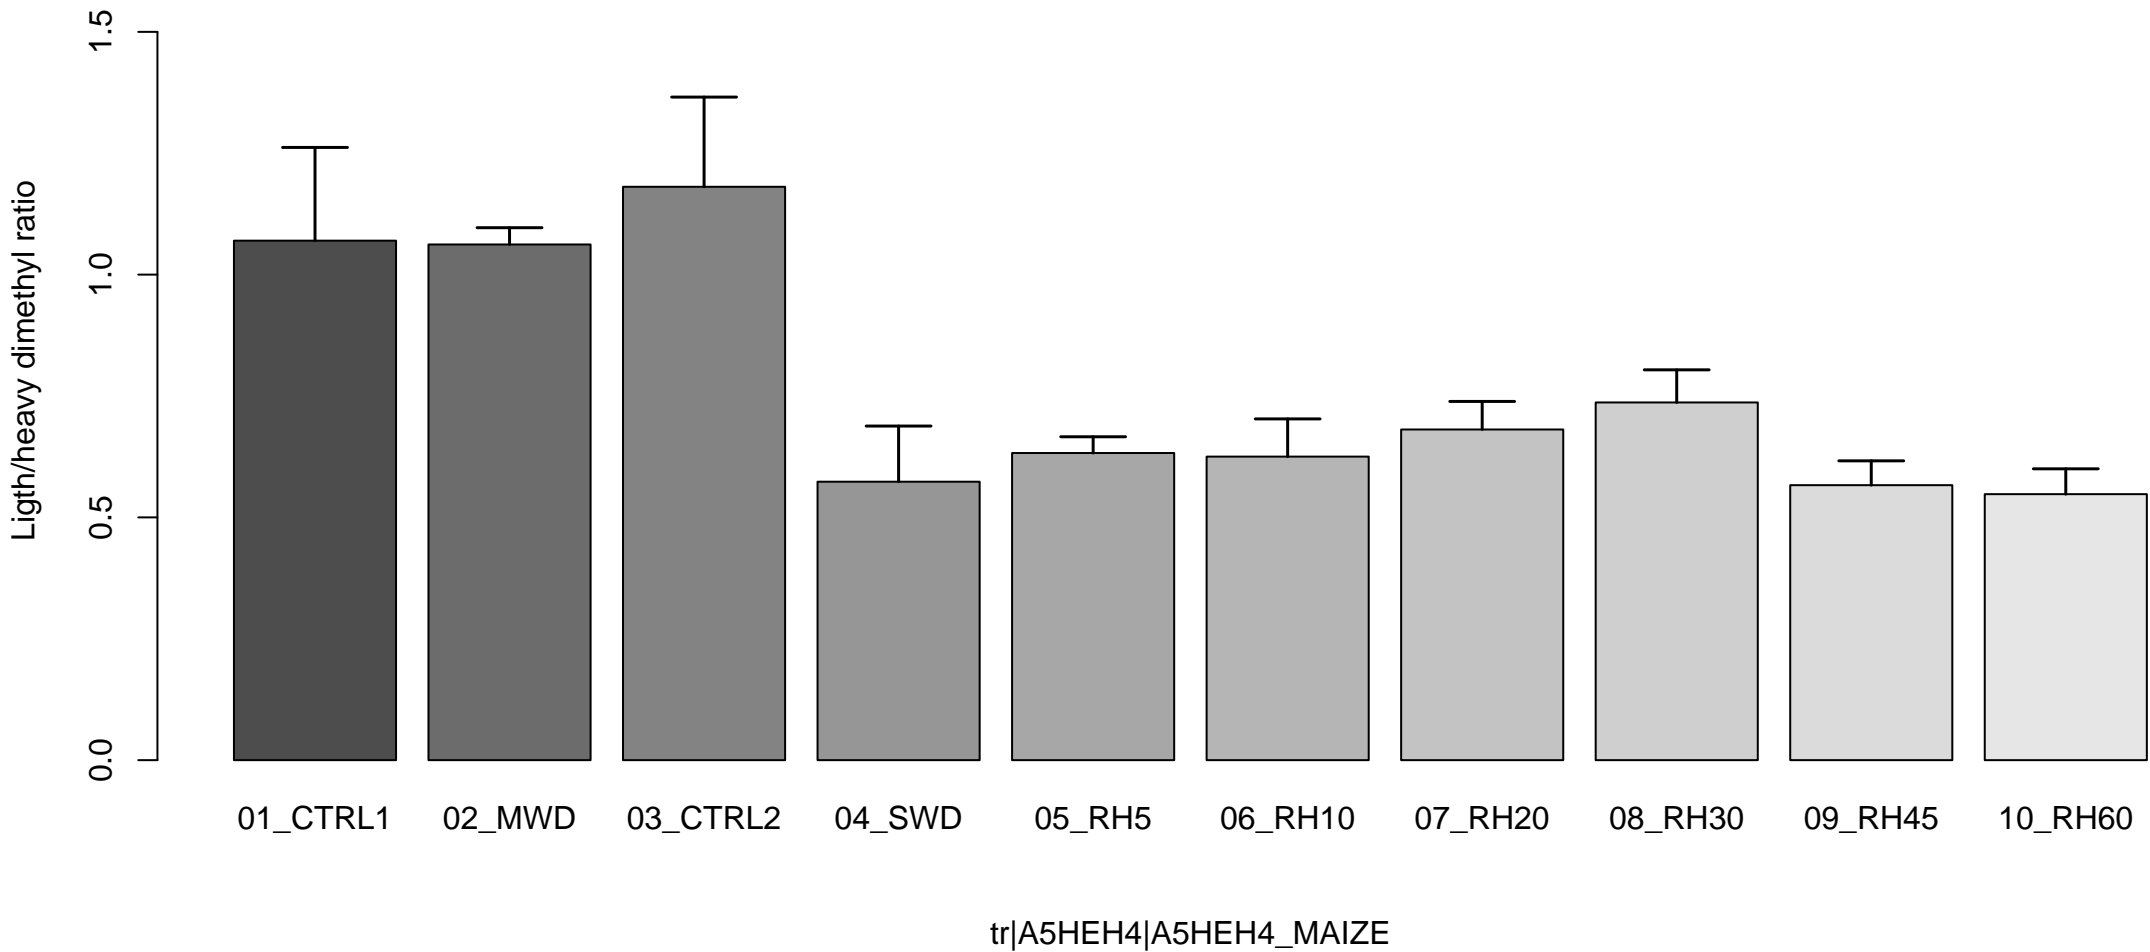

### R3h domain containing protein, Putative # T278

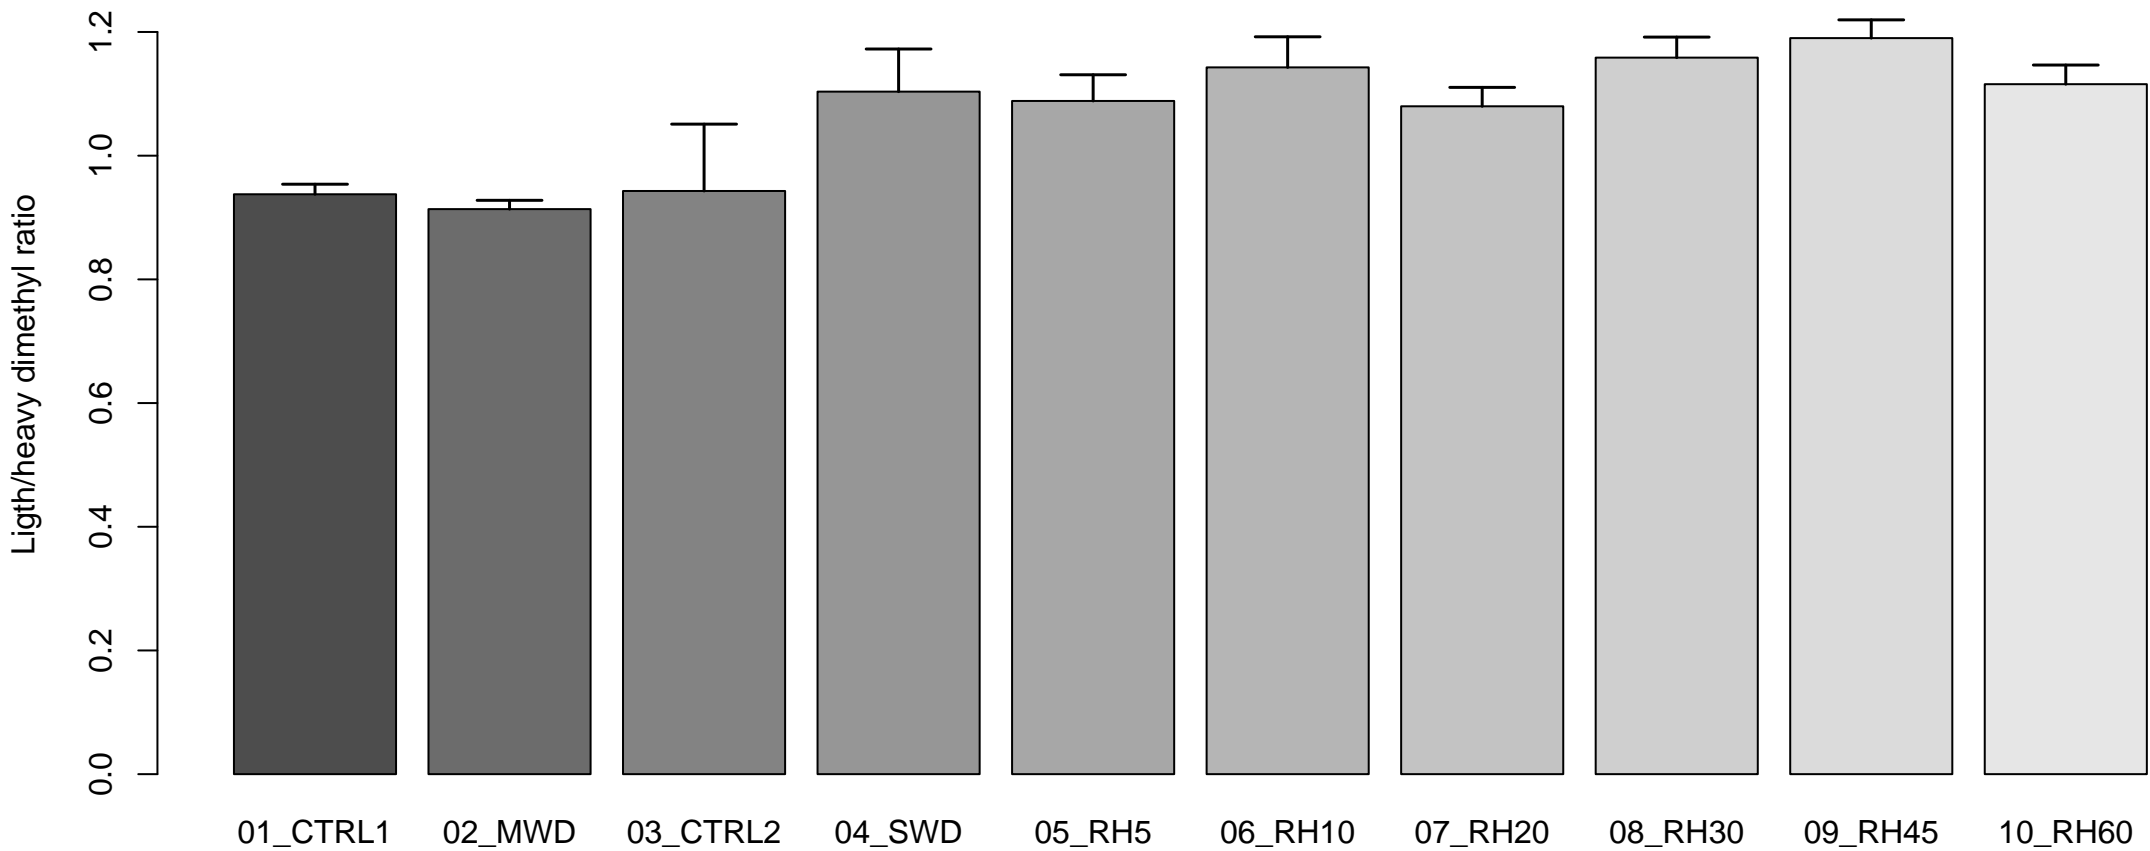

GRMZM2G103345\_P02

### Putative uncharacterized protein # S371/S372

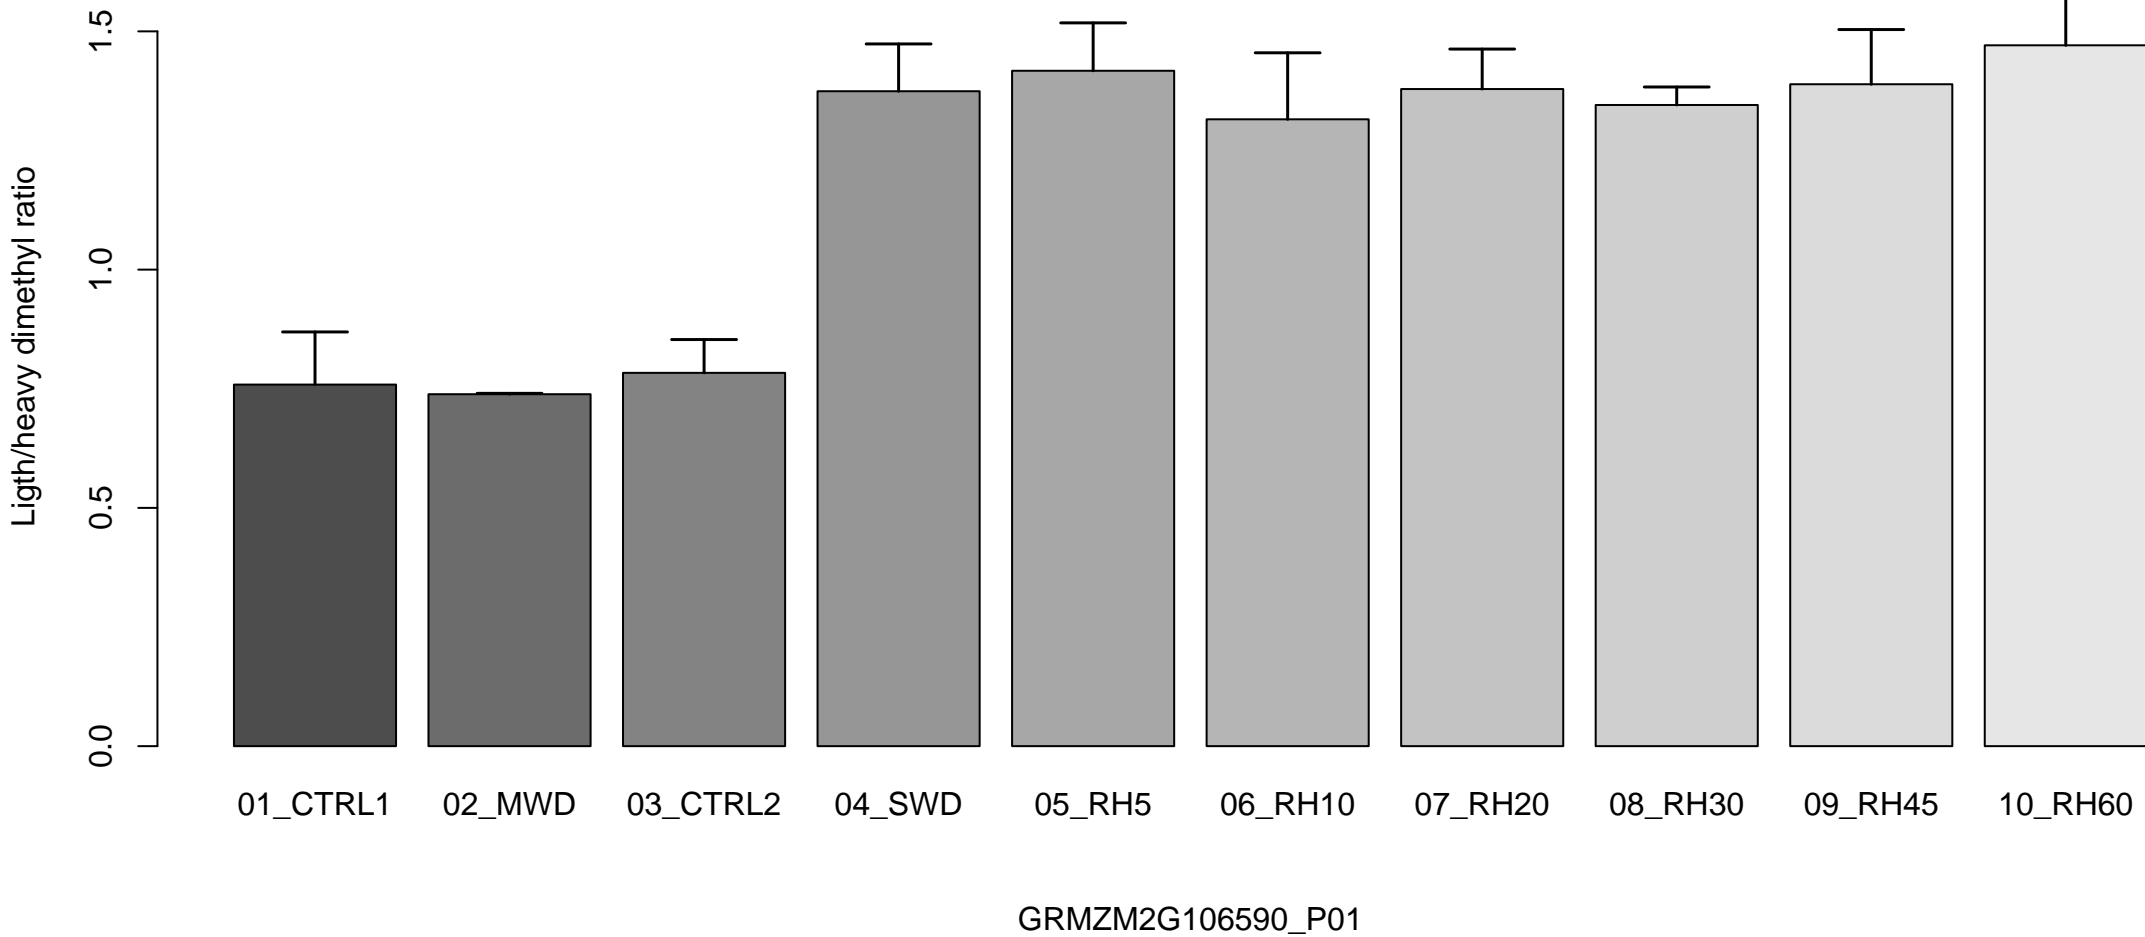

# Protein kinase G11A # S665

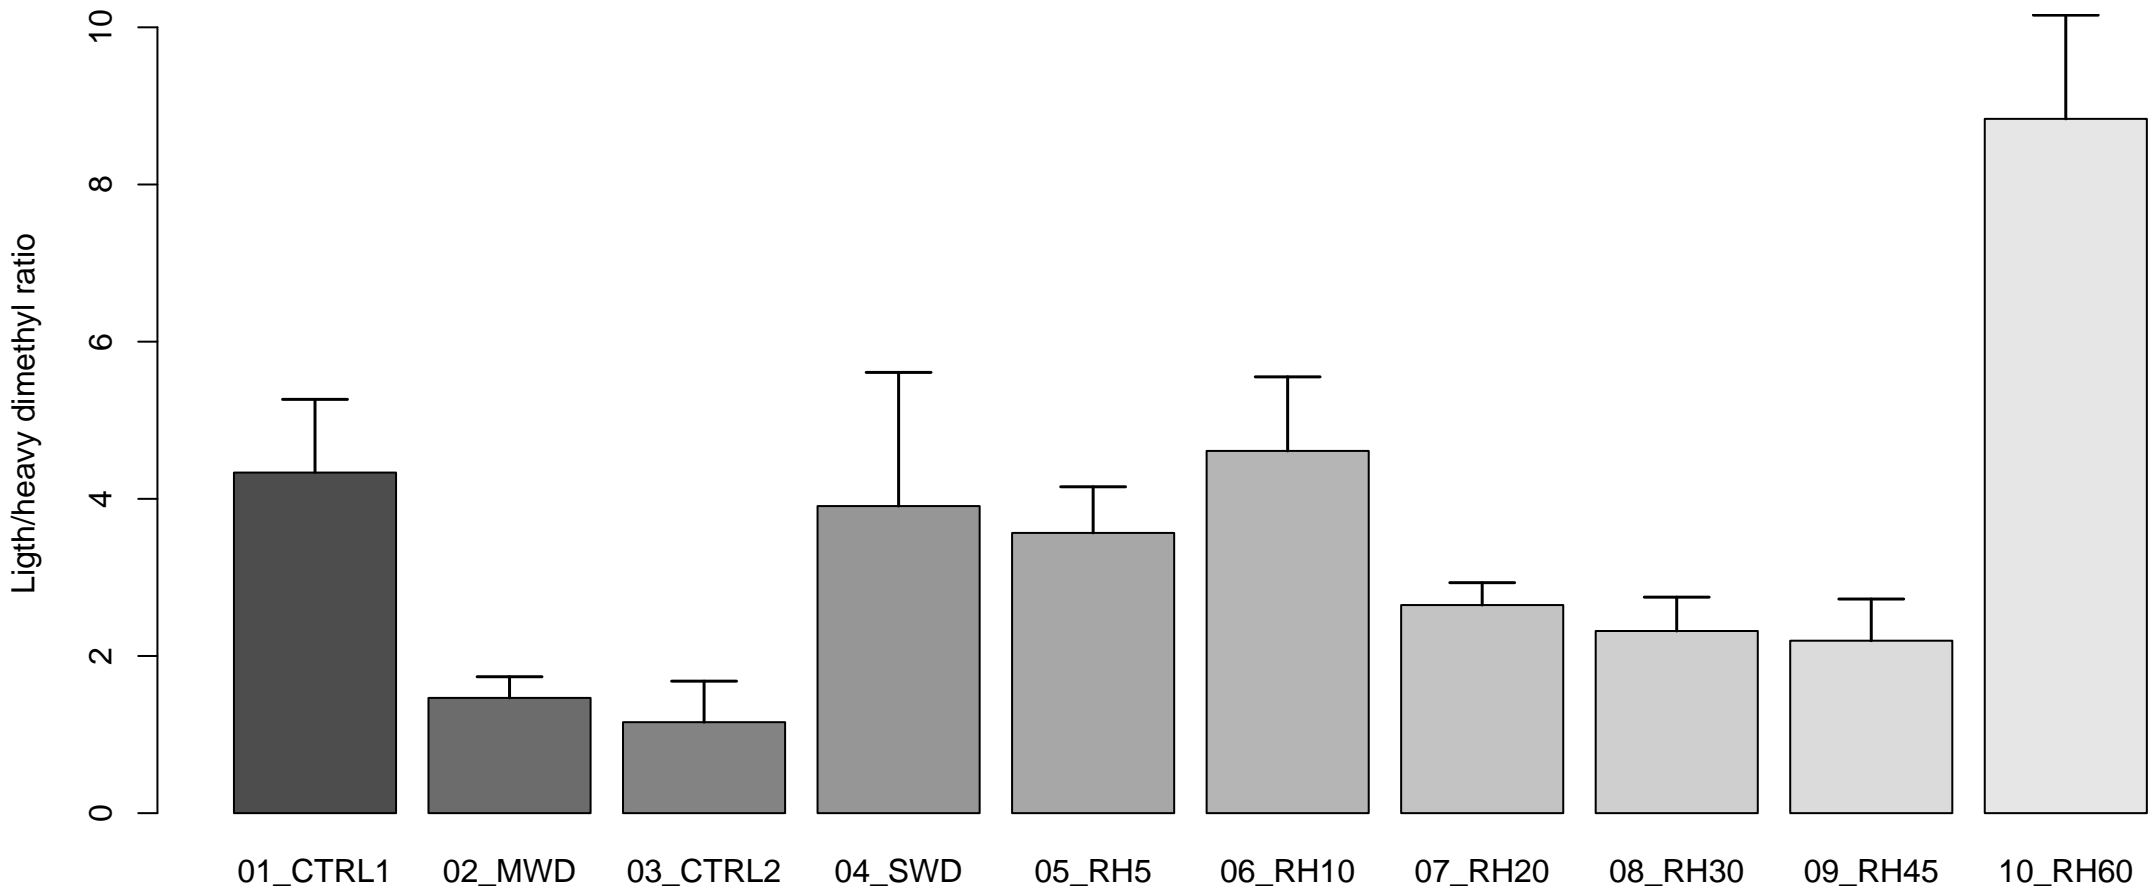

GRMZM2G016939\_P03

### Transmembrane protein 115 # S335

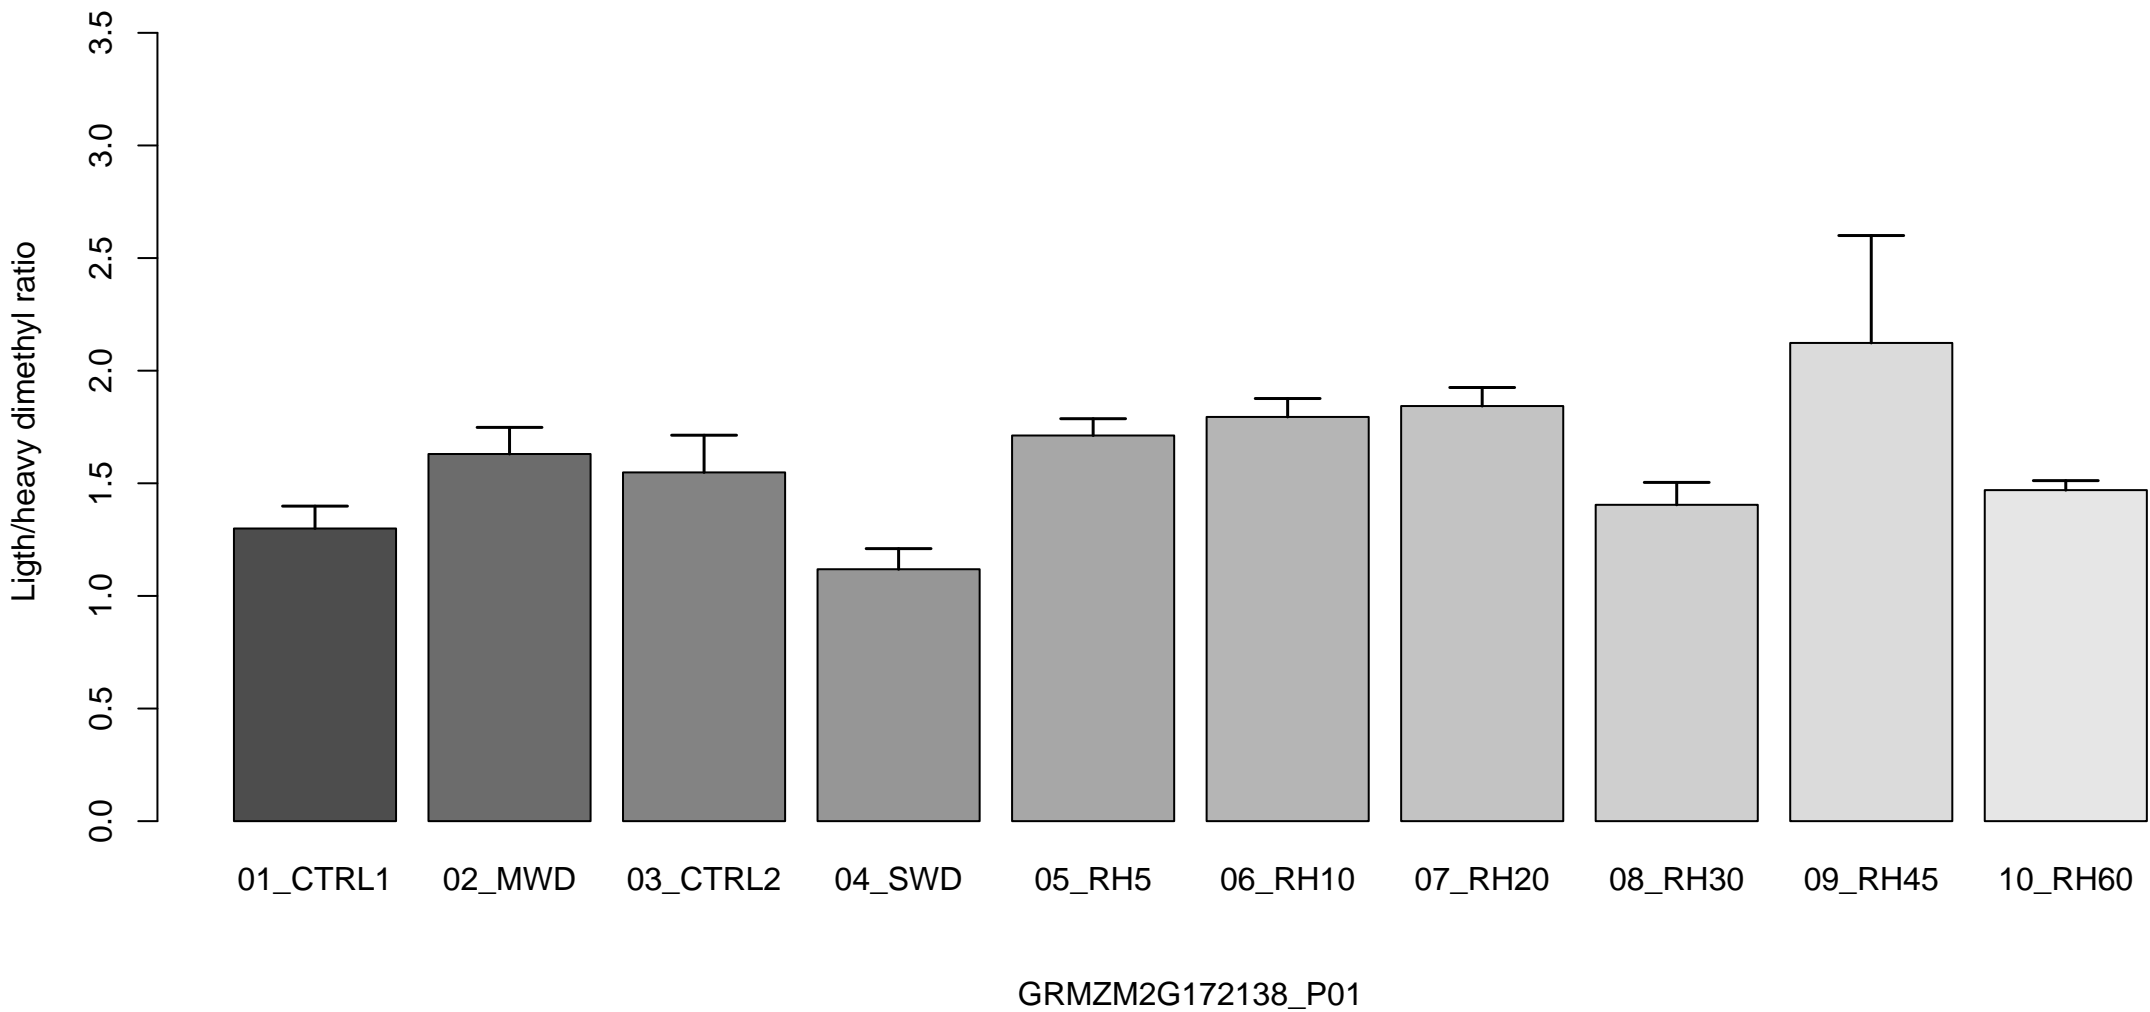



### Putative uncharacterized protein # S349/S350

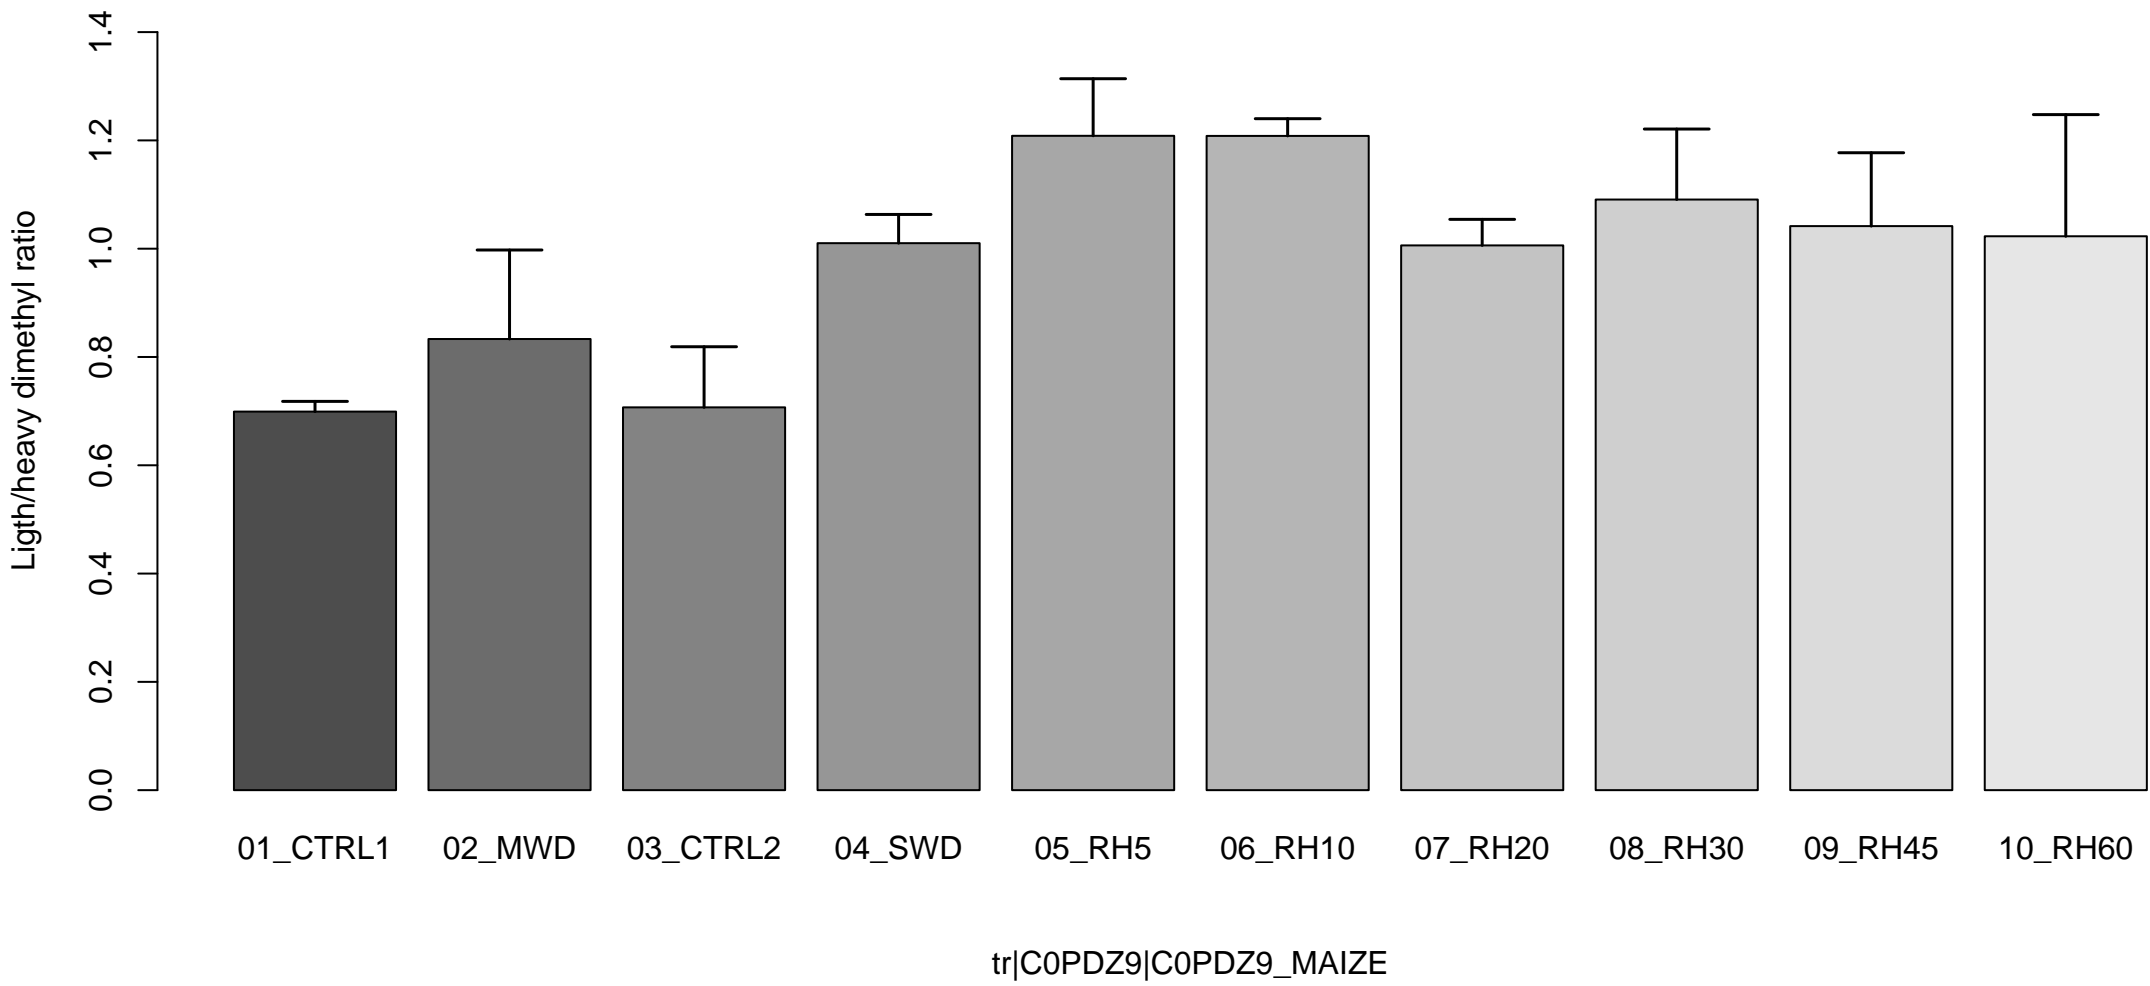

# ADP-ribosylation factor GTPase-activating protein 3 # S406

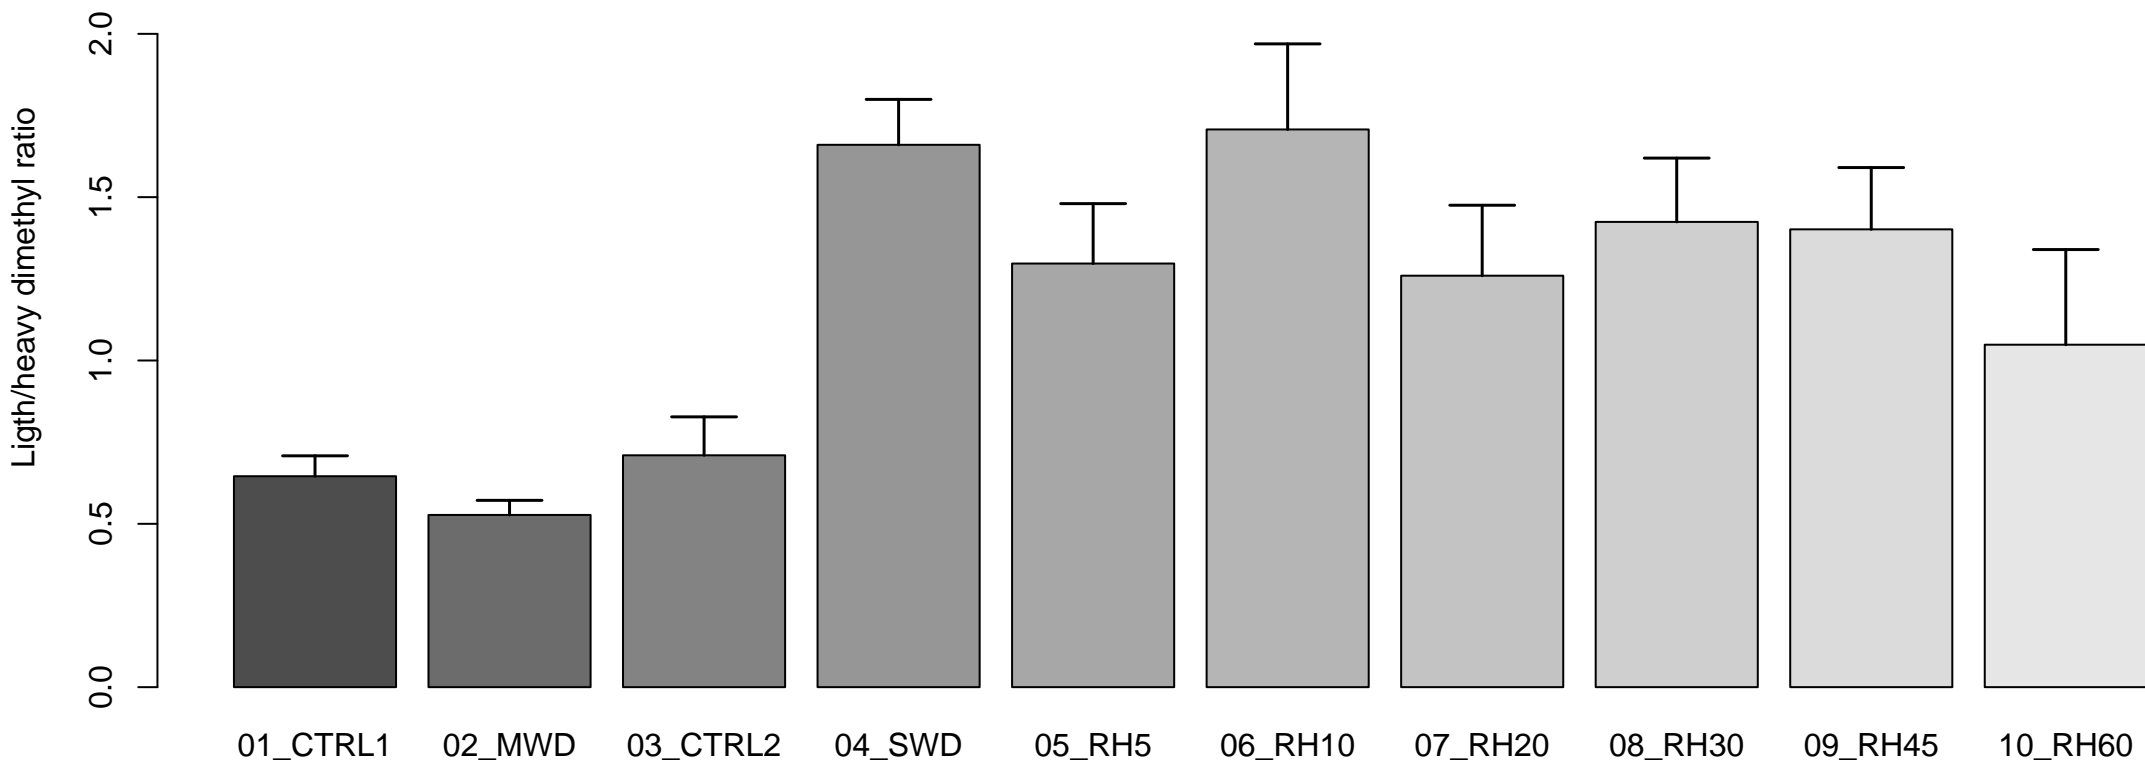

GRMZM2G176612\_P02

### HMG1/2-like protein # S159

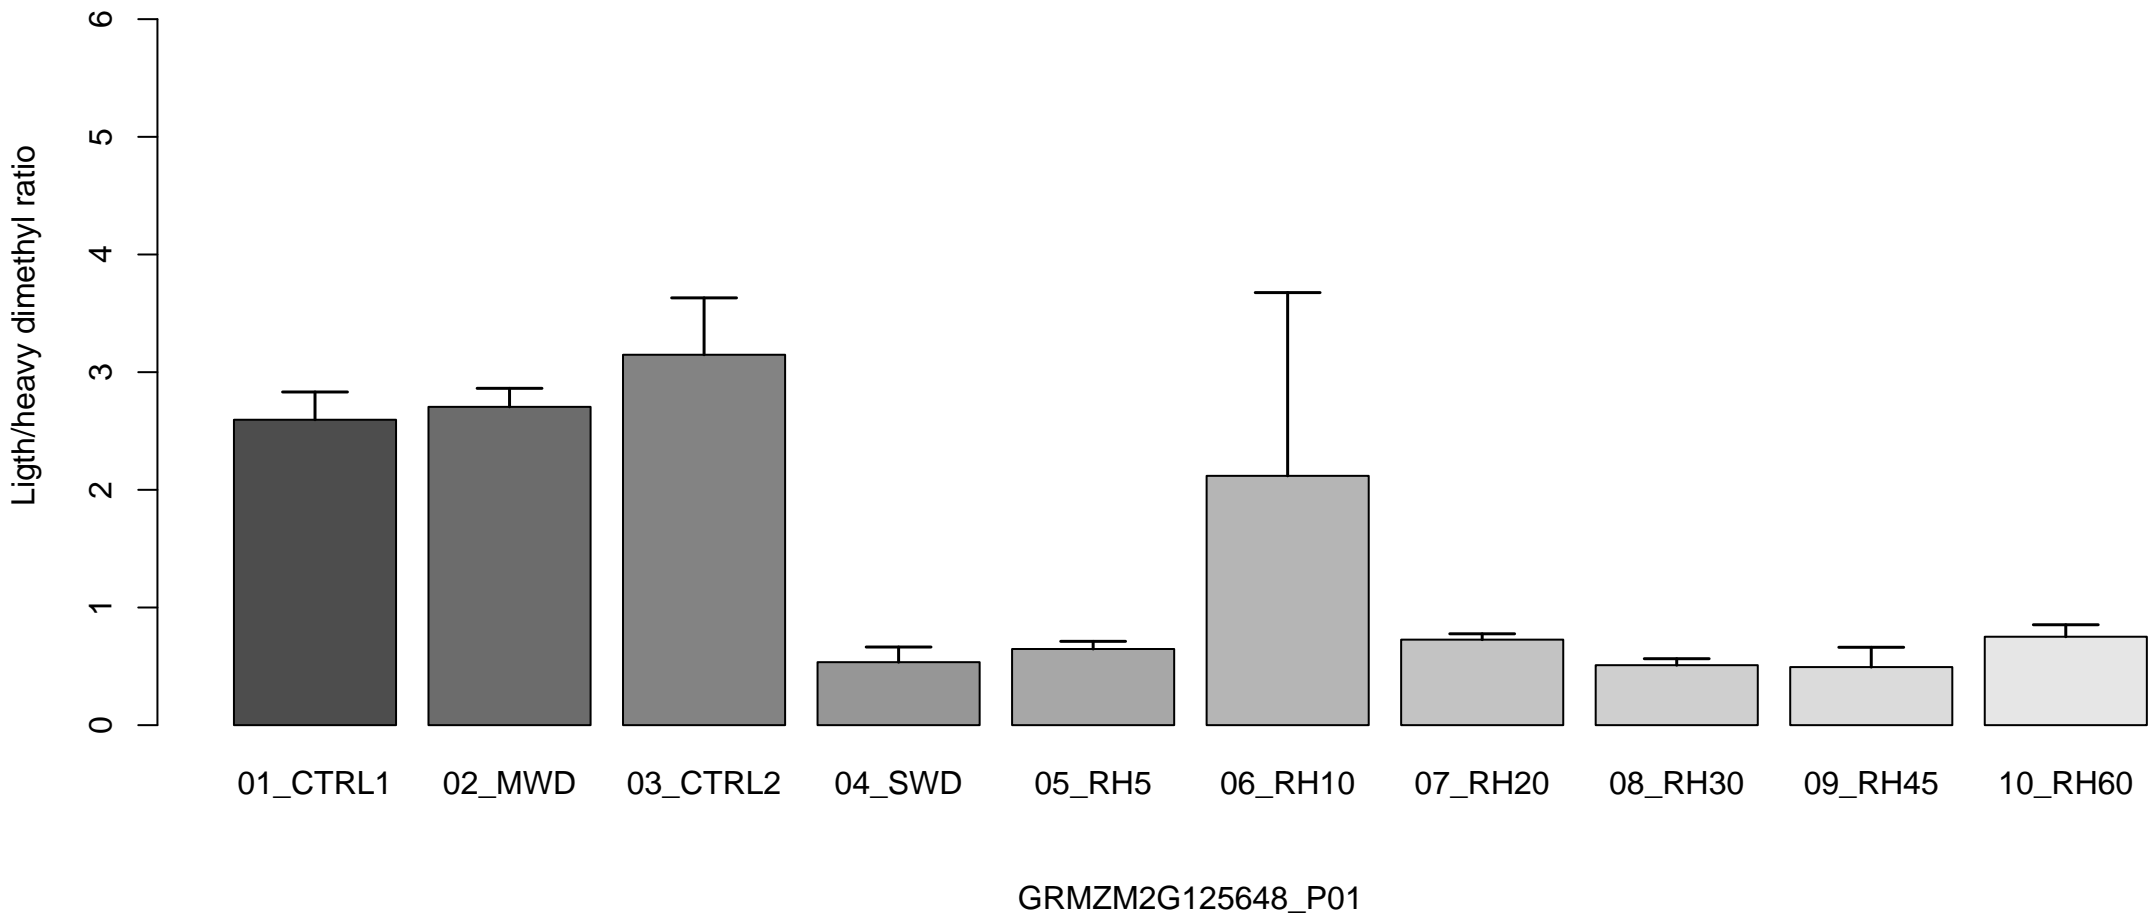

### Cytosolic orthophosphate dikinase # T461

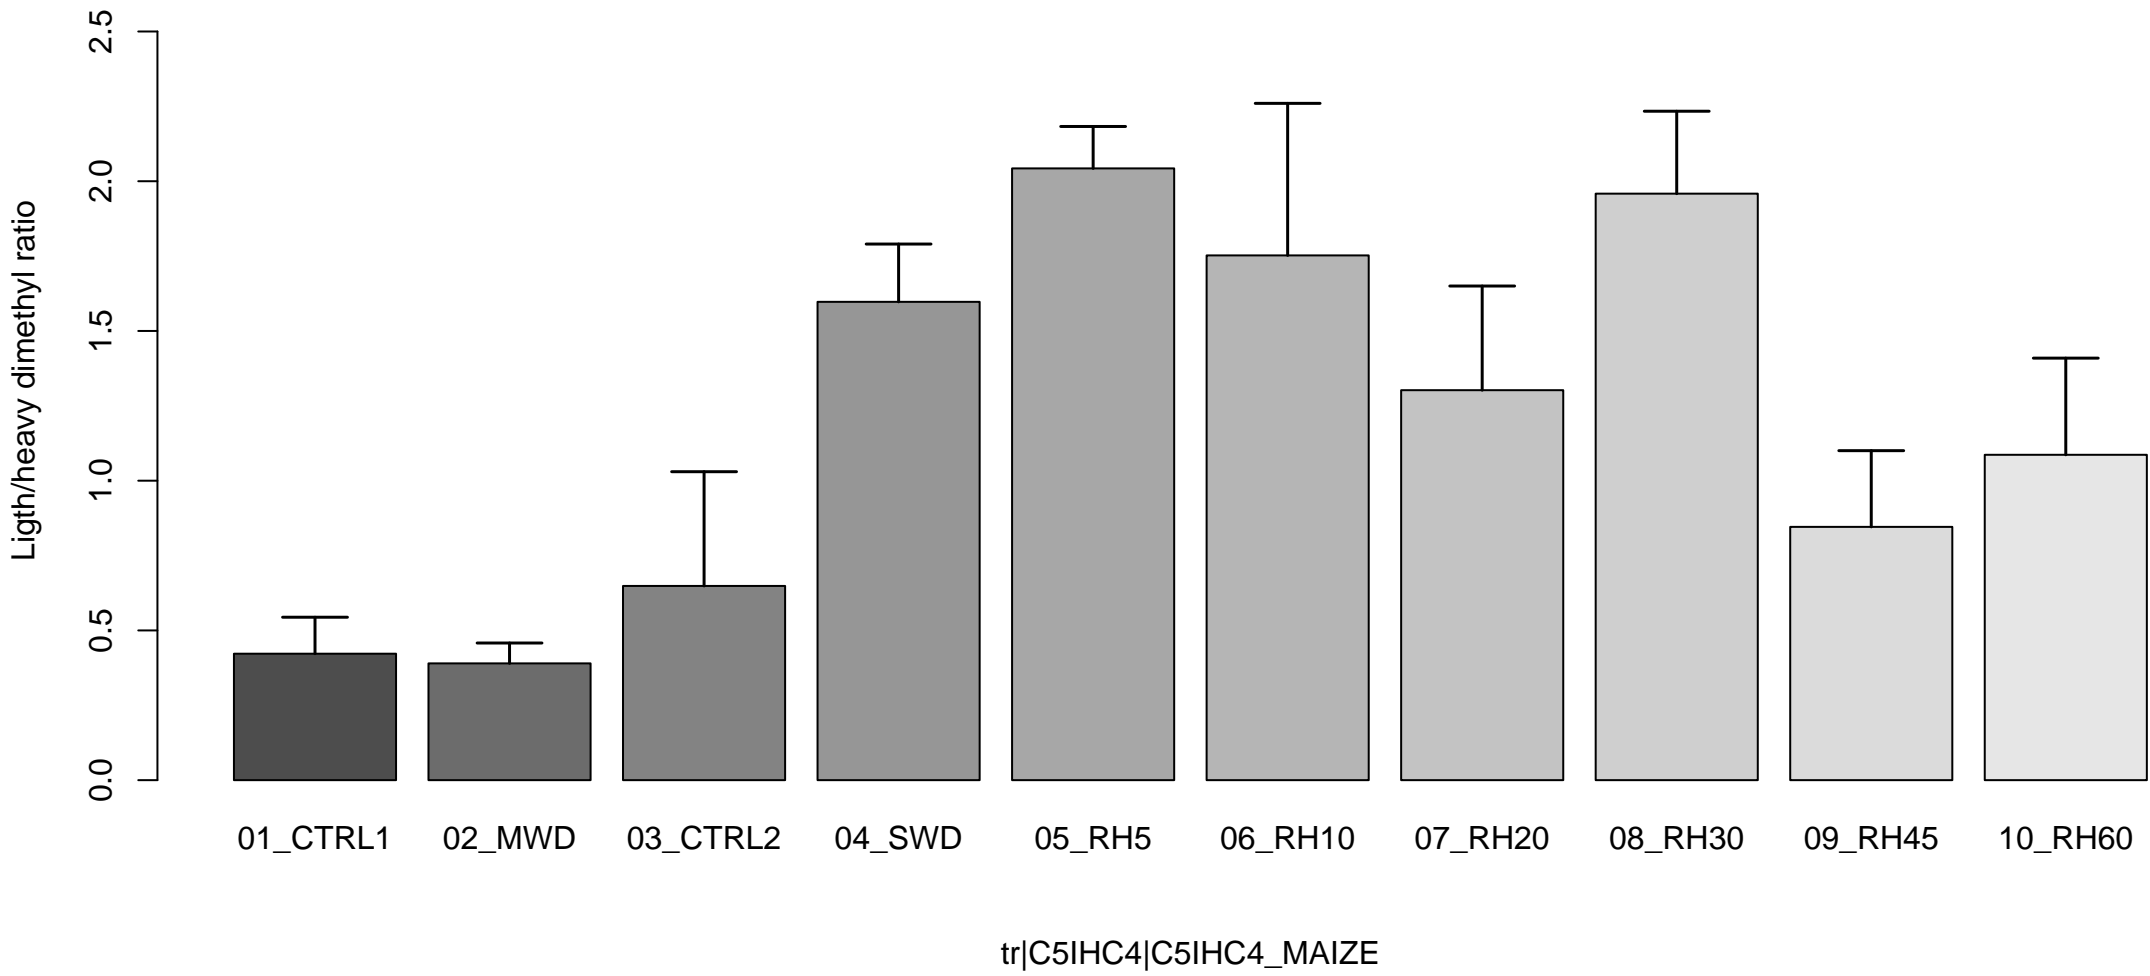

### Citrate transporter family protein # S241

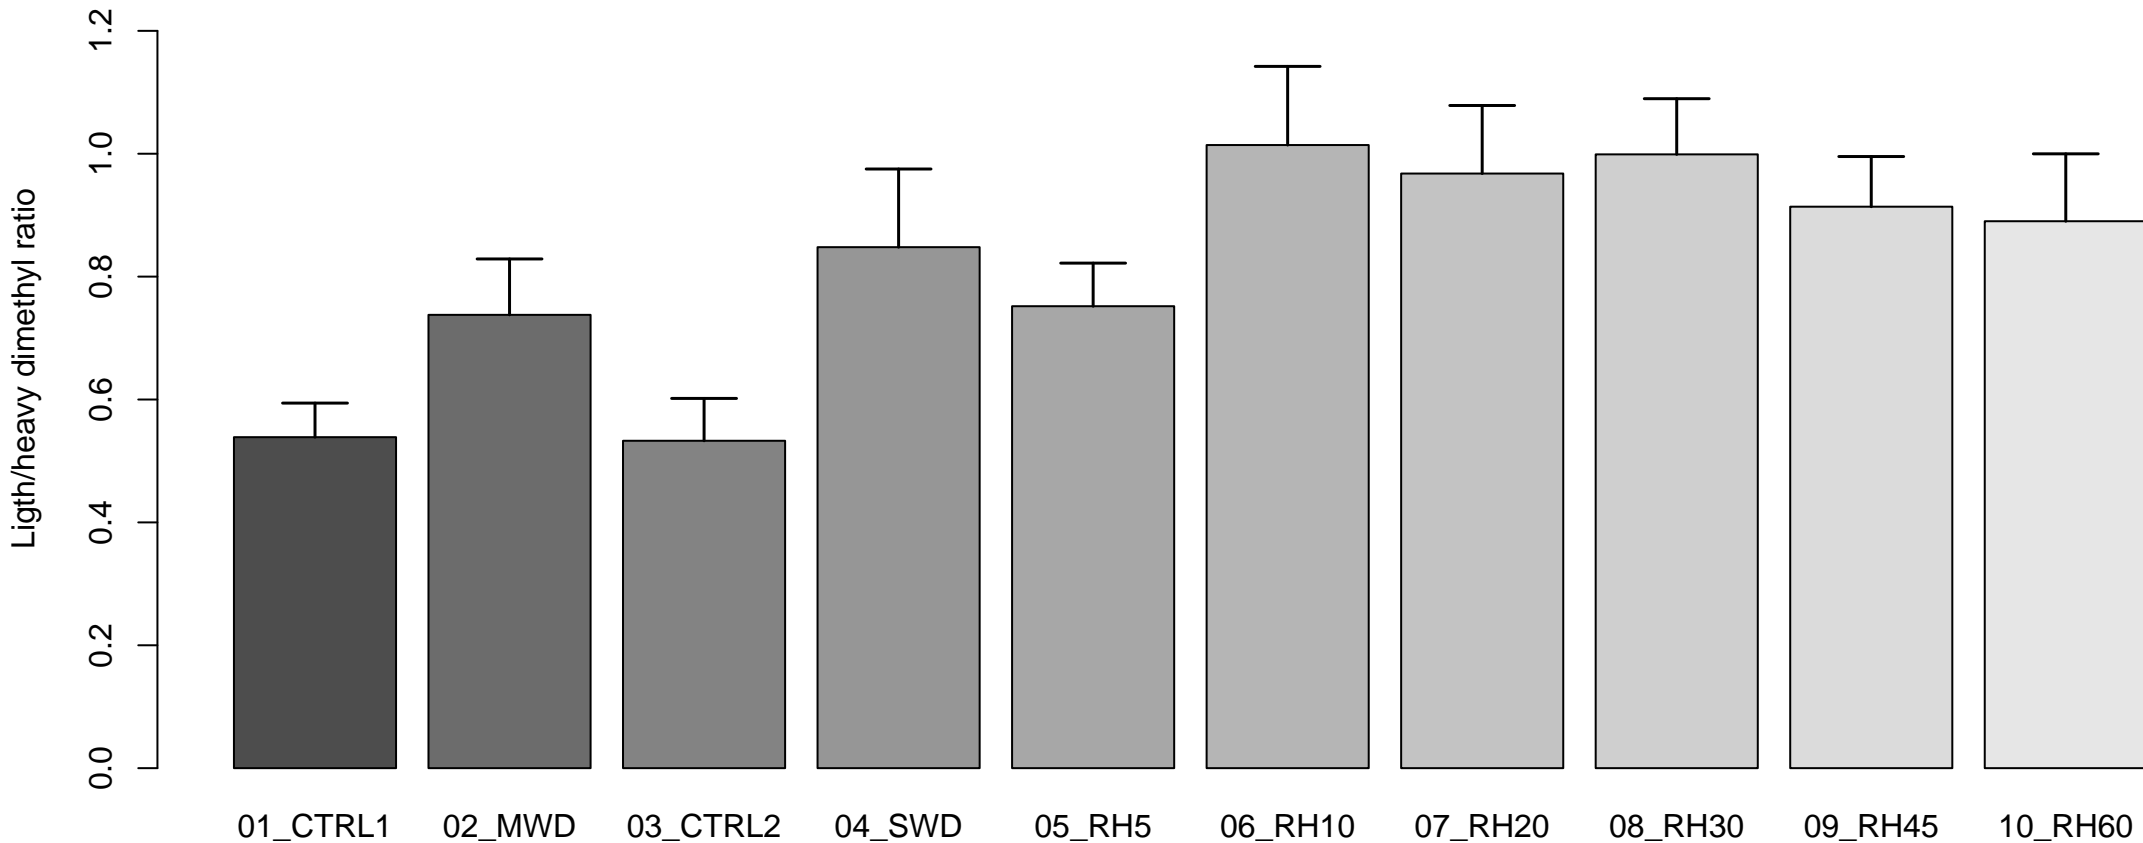

tr|B8A307|B8A307\_MAIZE

### Ubiquitin interaction motif-containing protein # S21

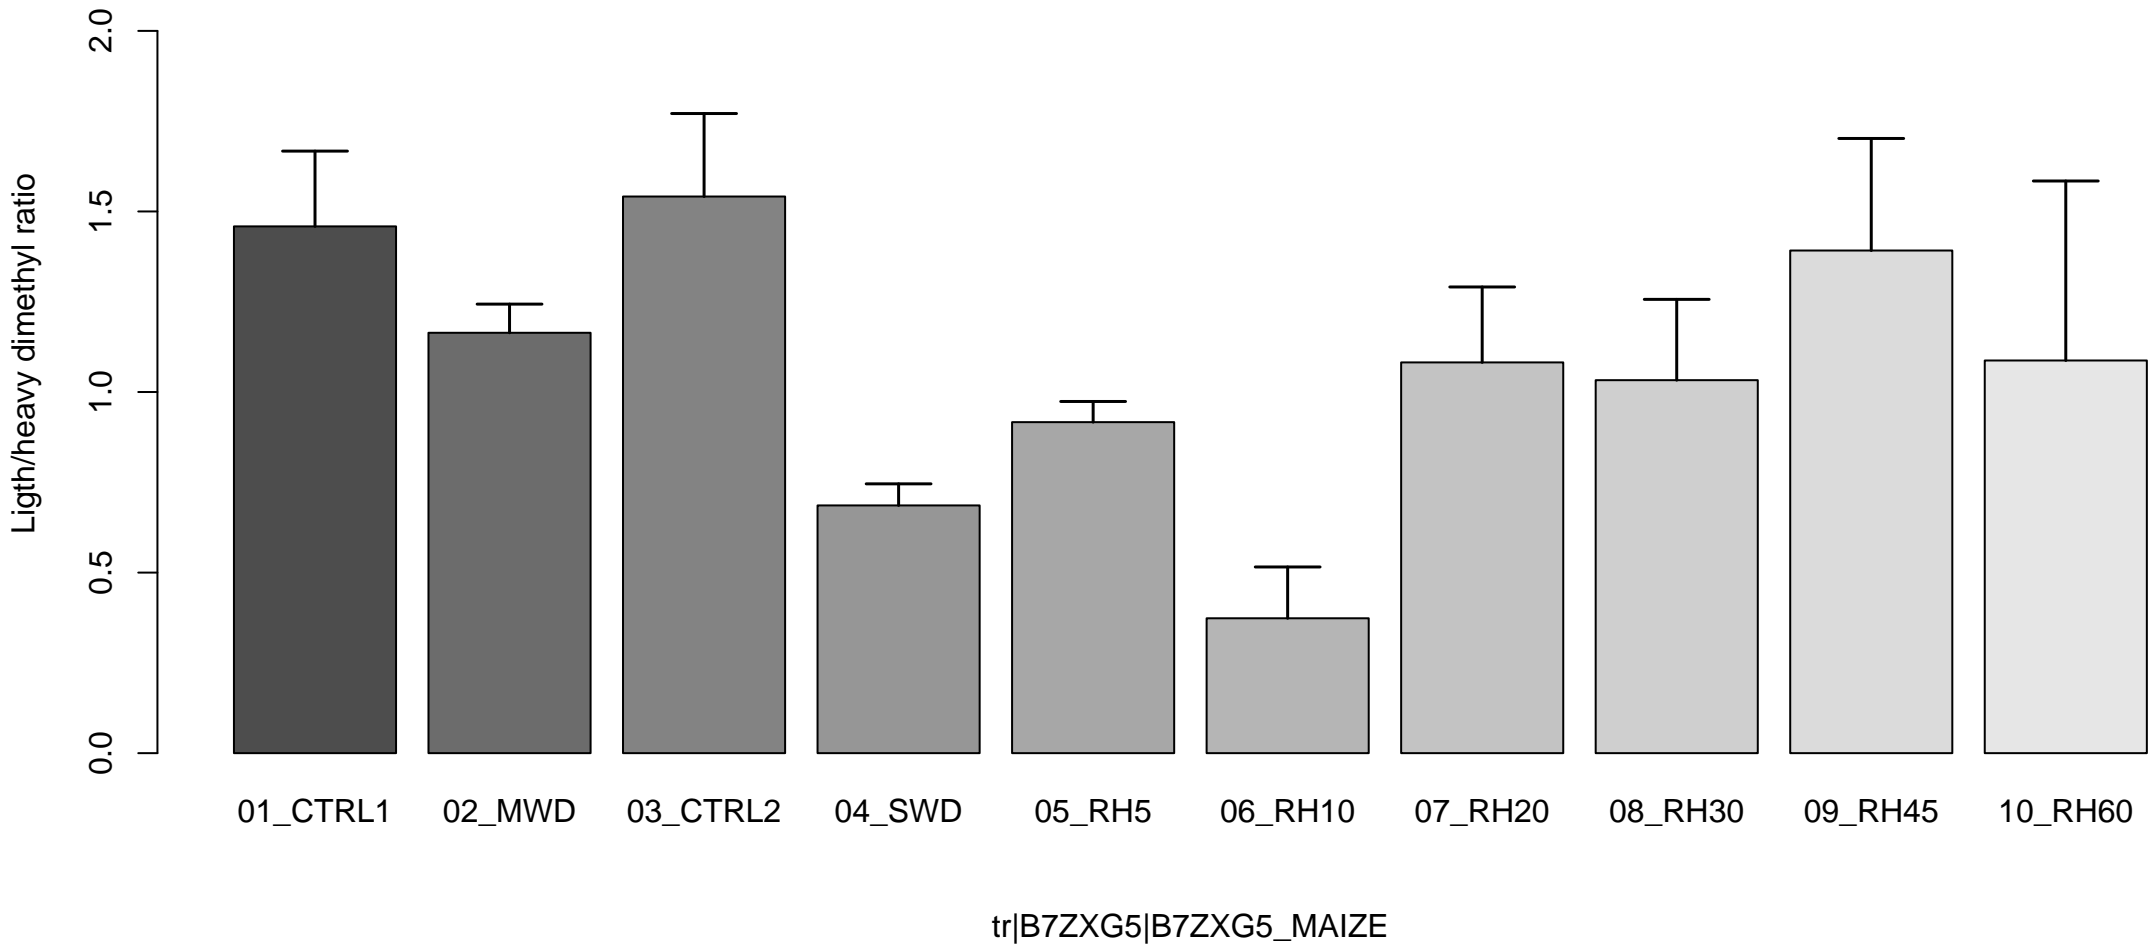

### Sucrose phosphate synthase A # S168

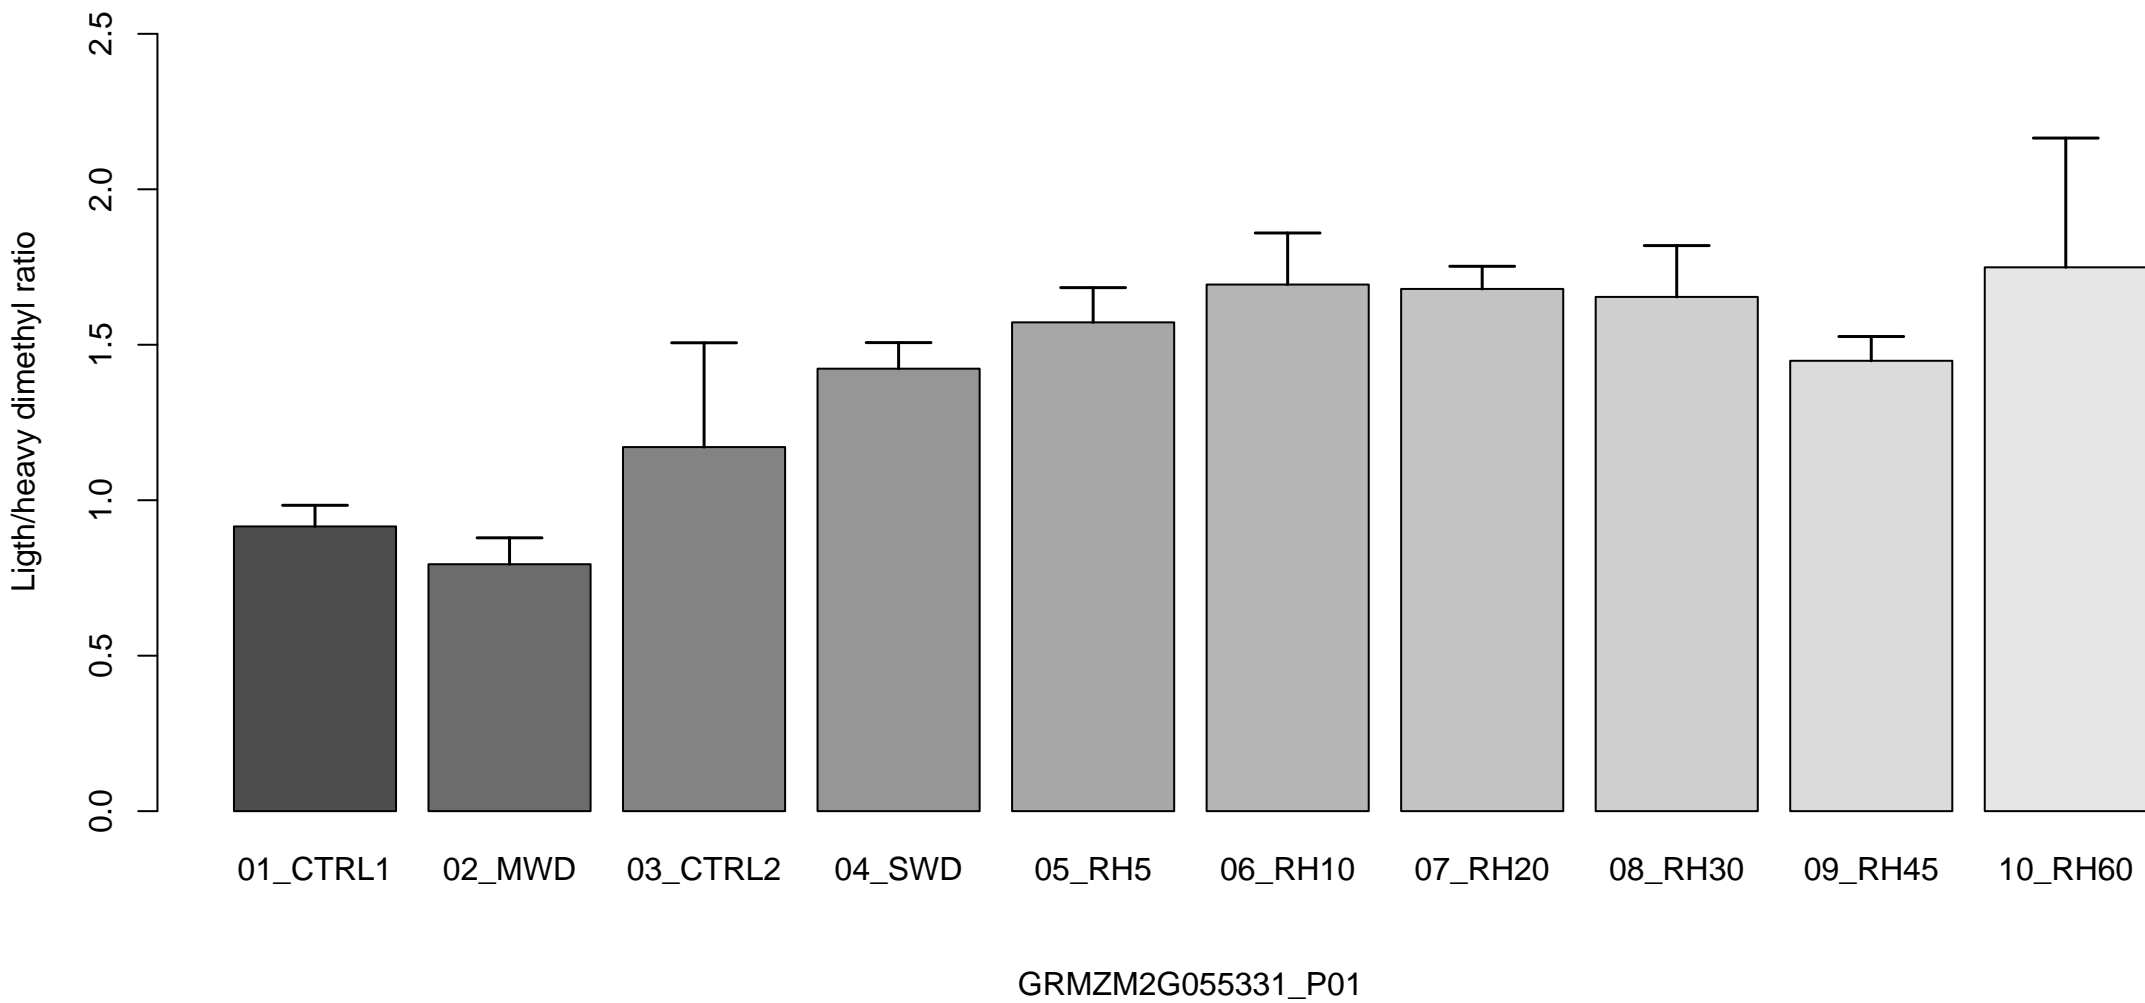

### Sucrose phosphate synthase A # S95

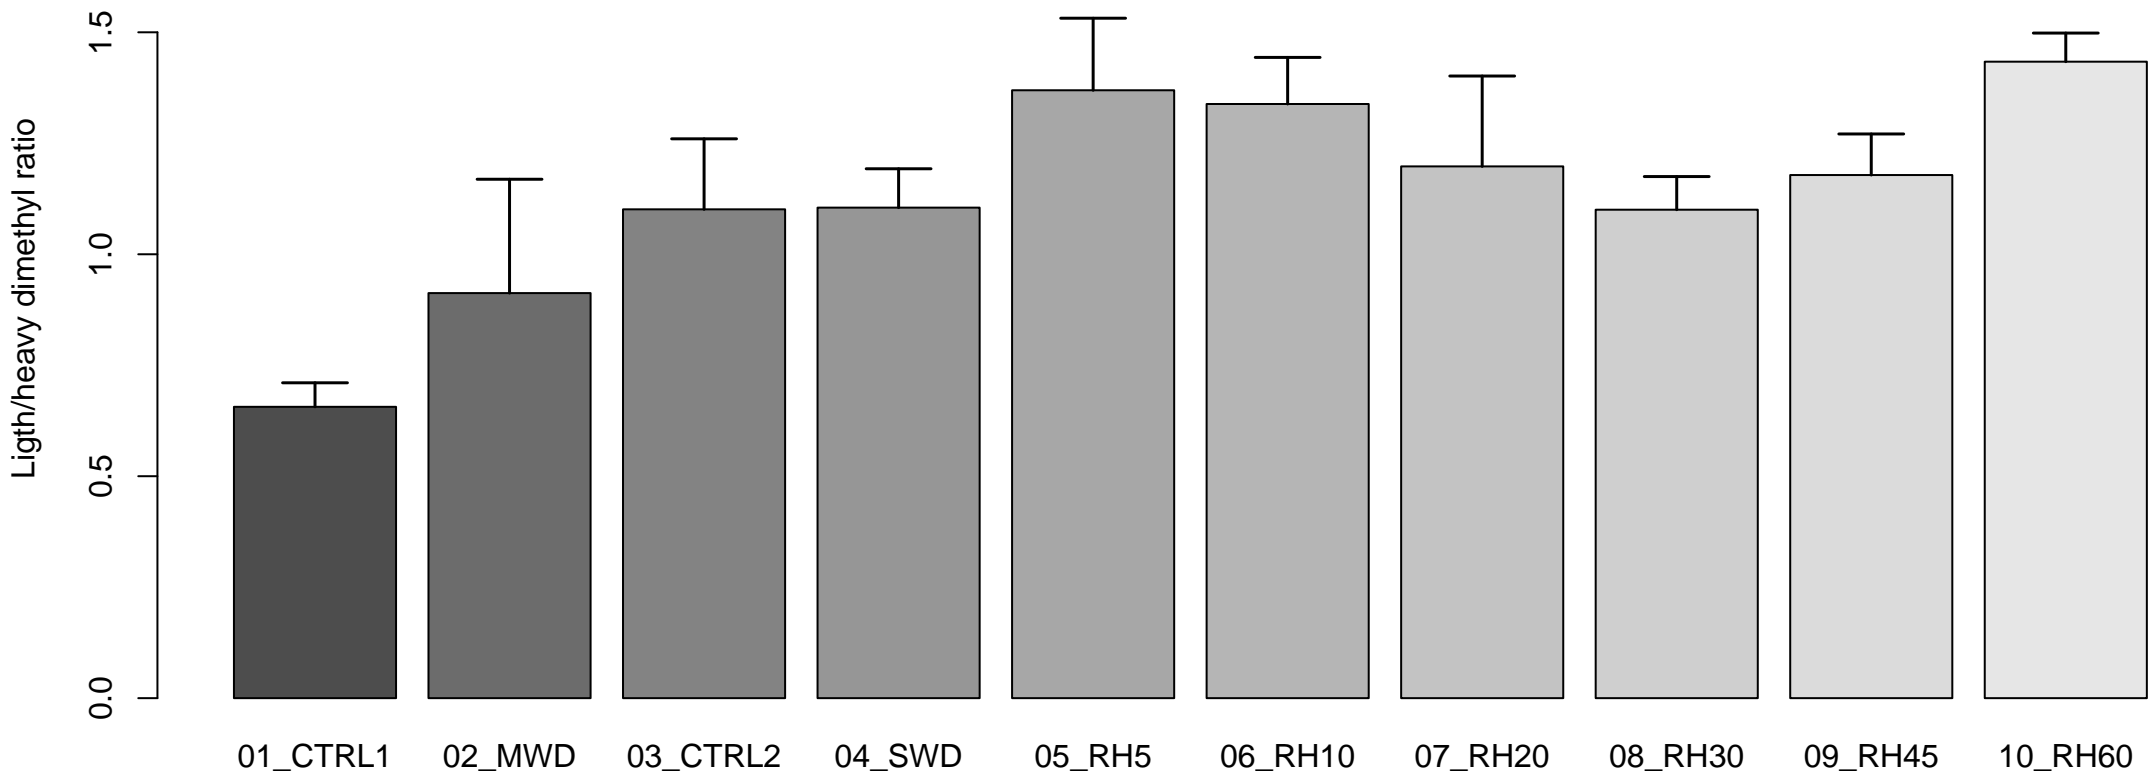

GRMZM2G055331\_P08



# HMGI/Y protein # S151

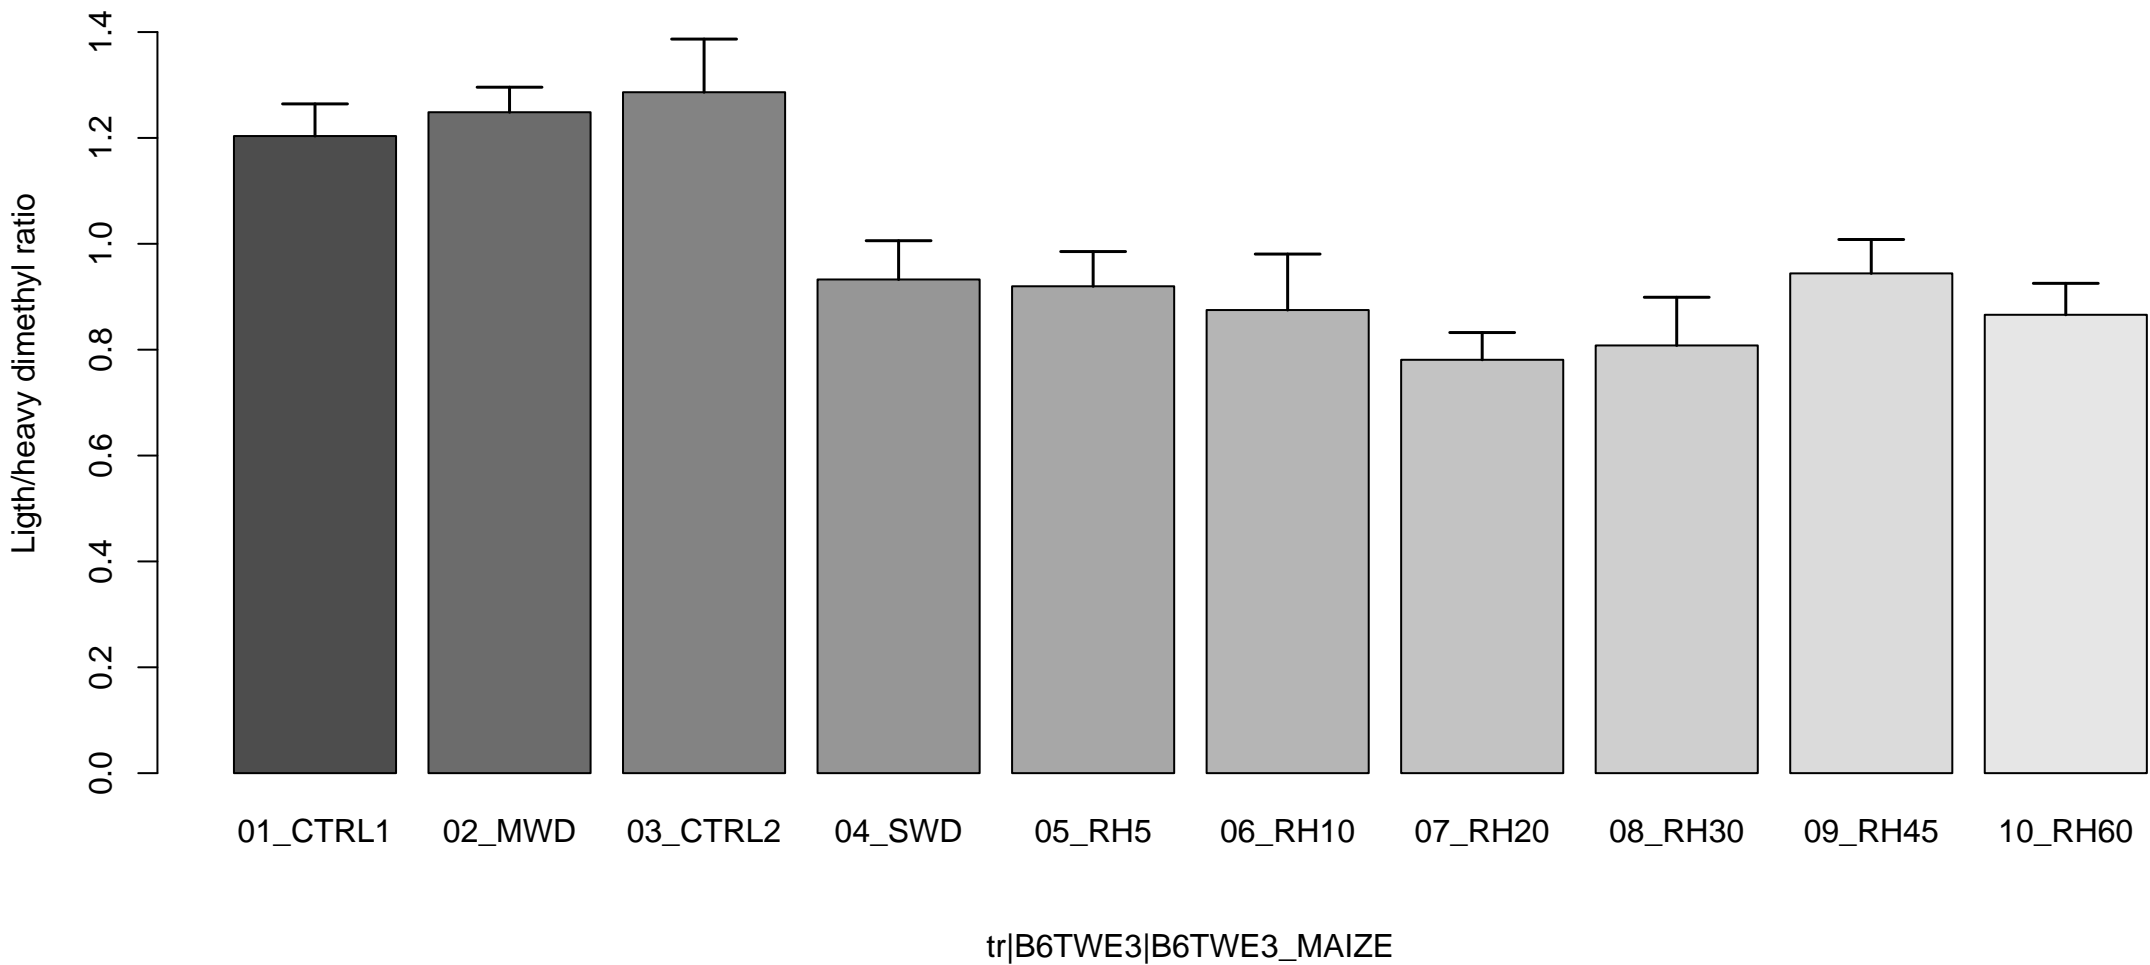

# Eukaryotic translation initiation factor 3 subunit G # T168/S169

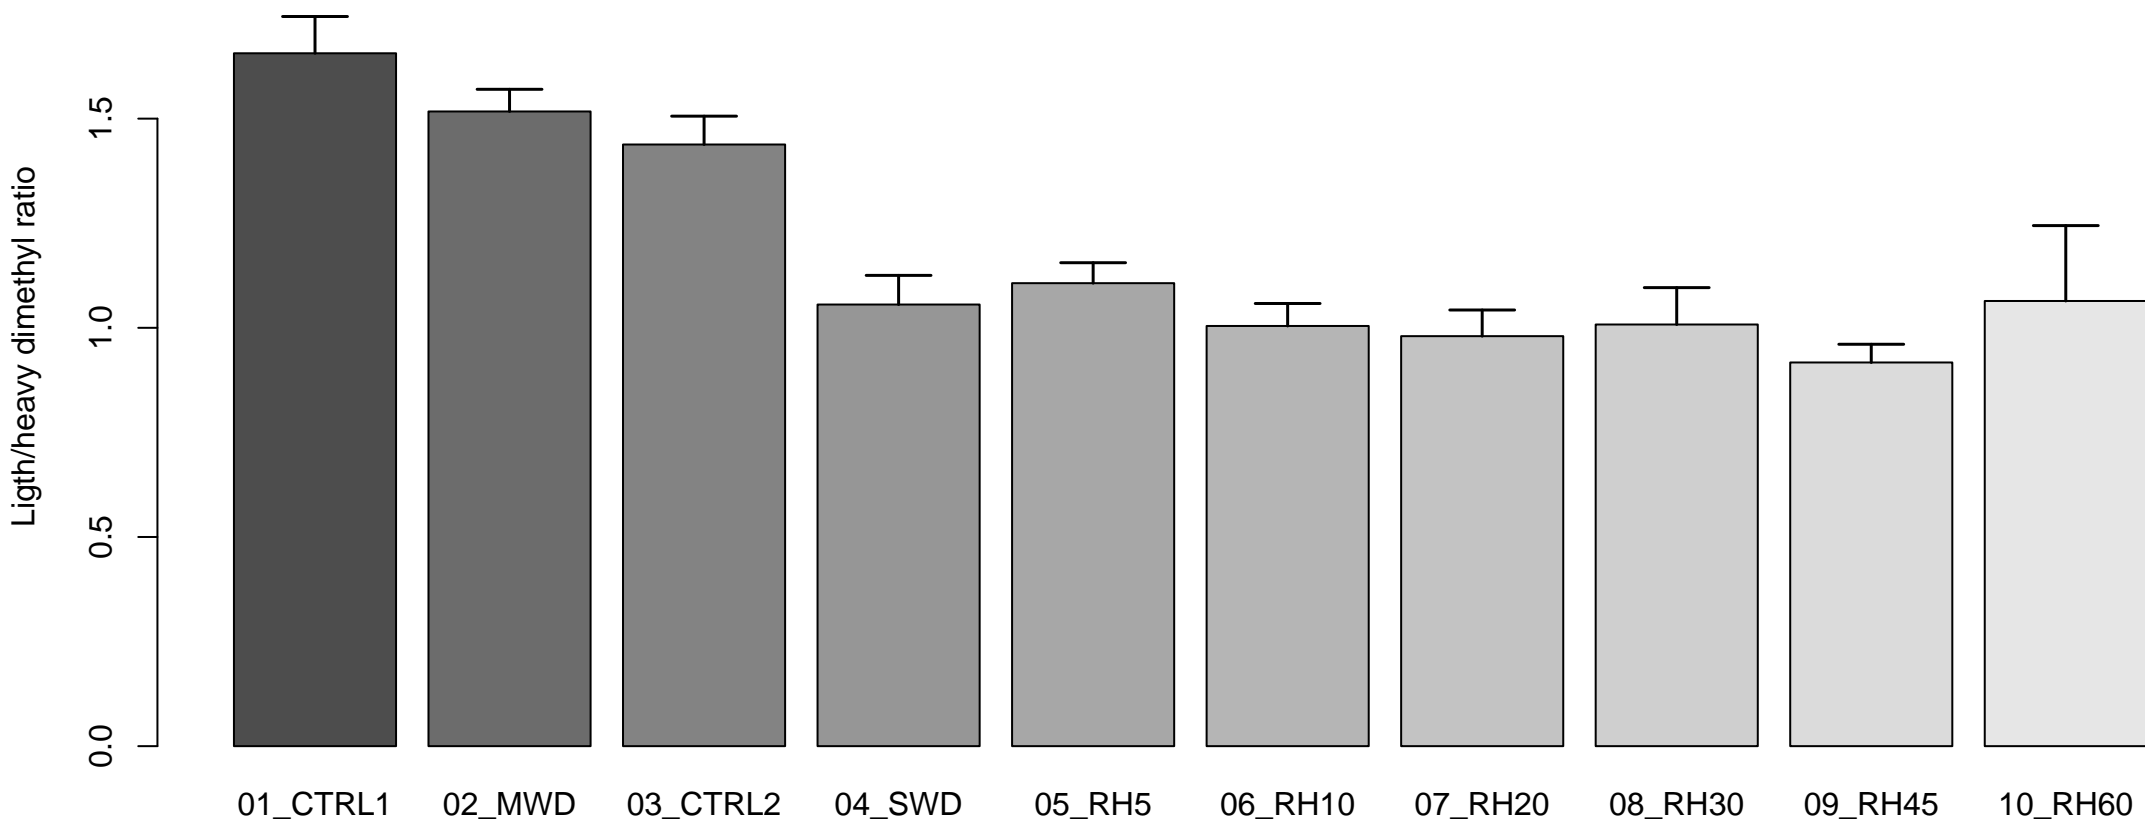

tr|B4FBV8|B4FBV8\_MAIZE

### Putative uncharacterized protein (IPR005819 Histone H5) # S395

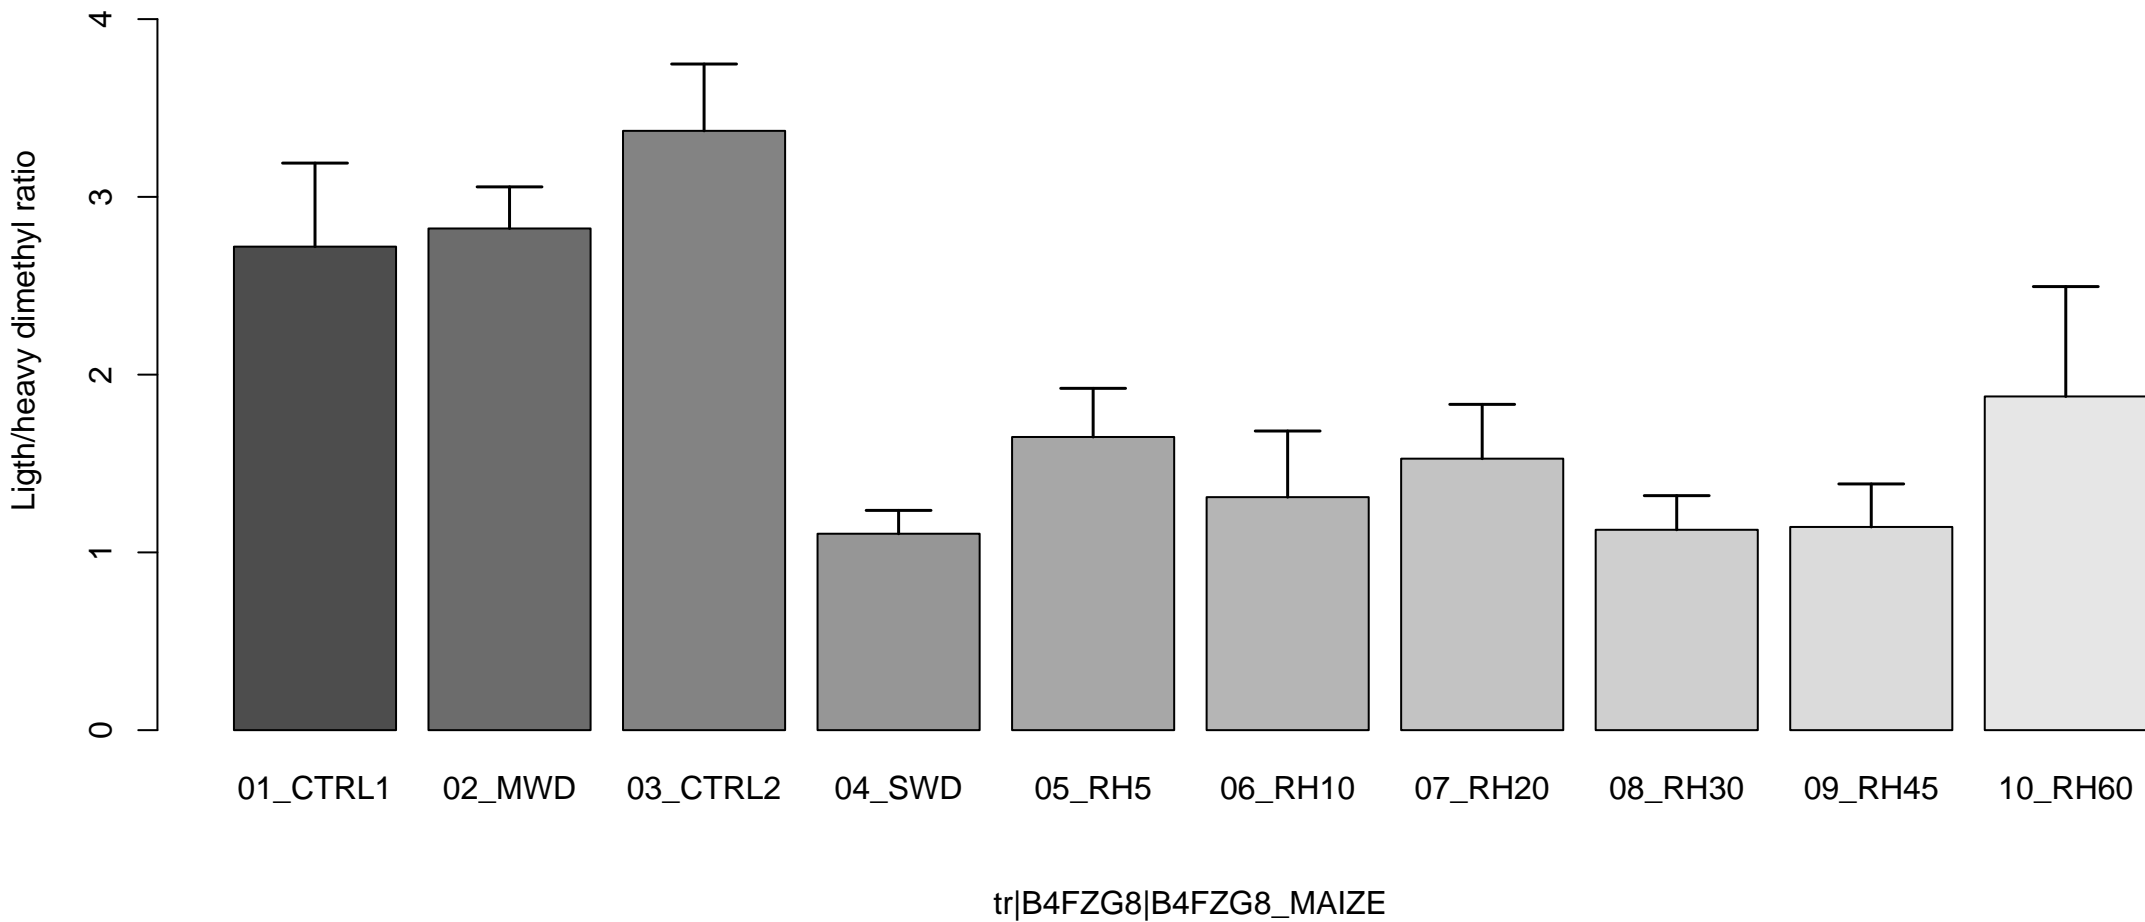

### Transmembrane protein 115 # S310

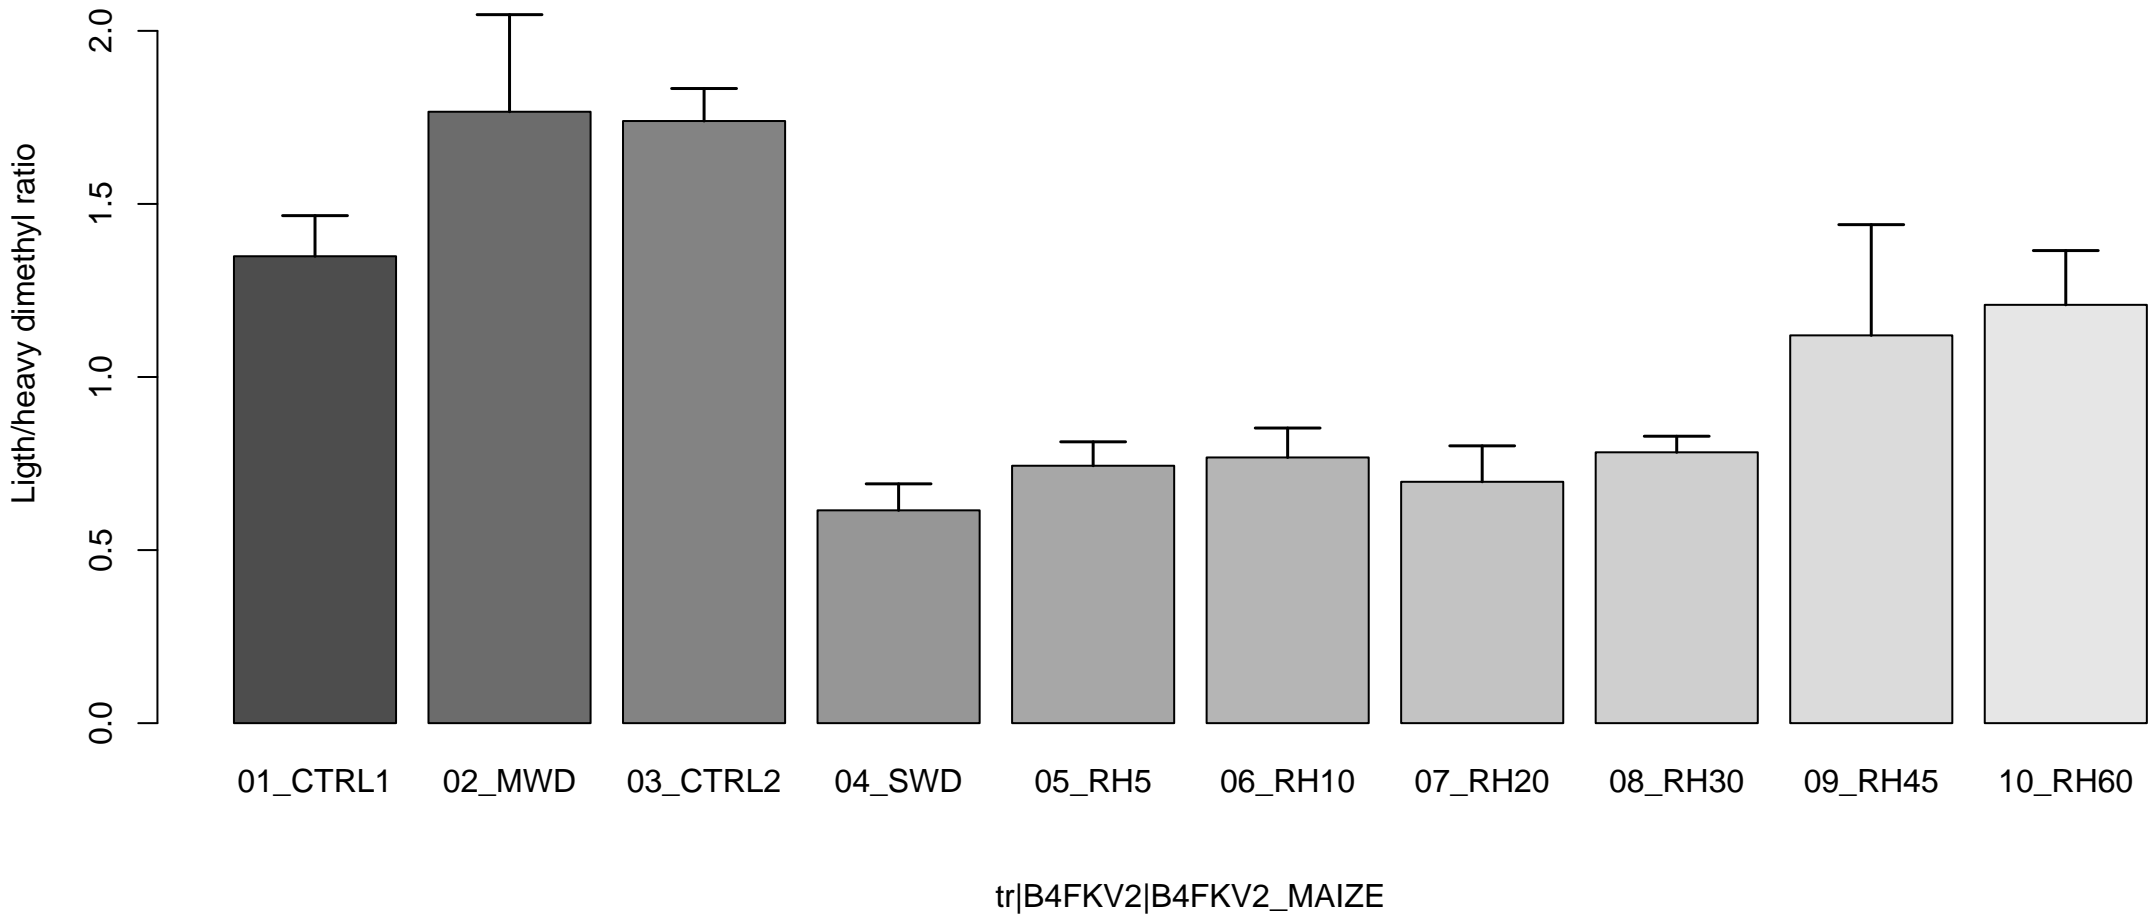

### Galactose mutarotase-like # S158

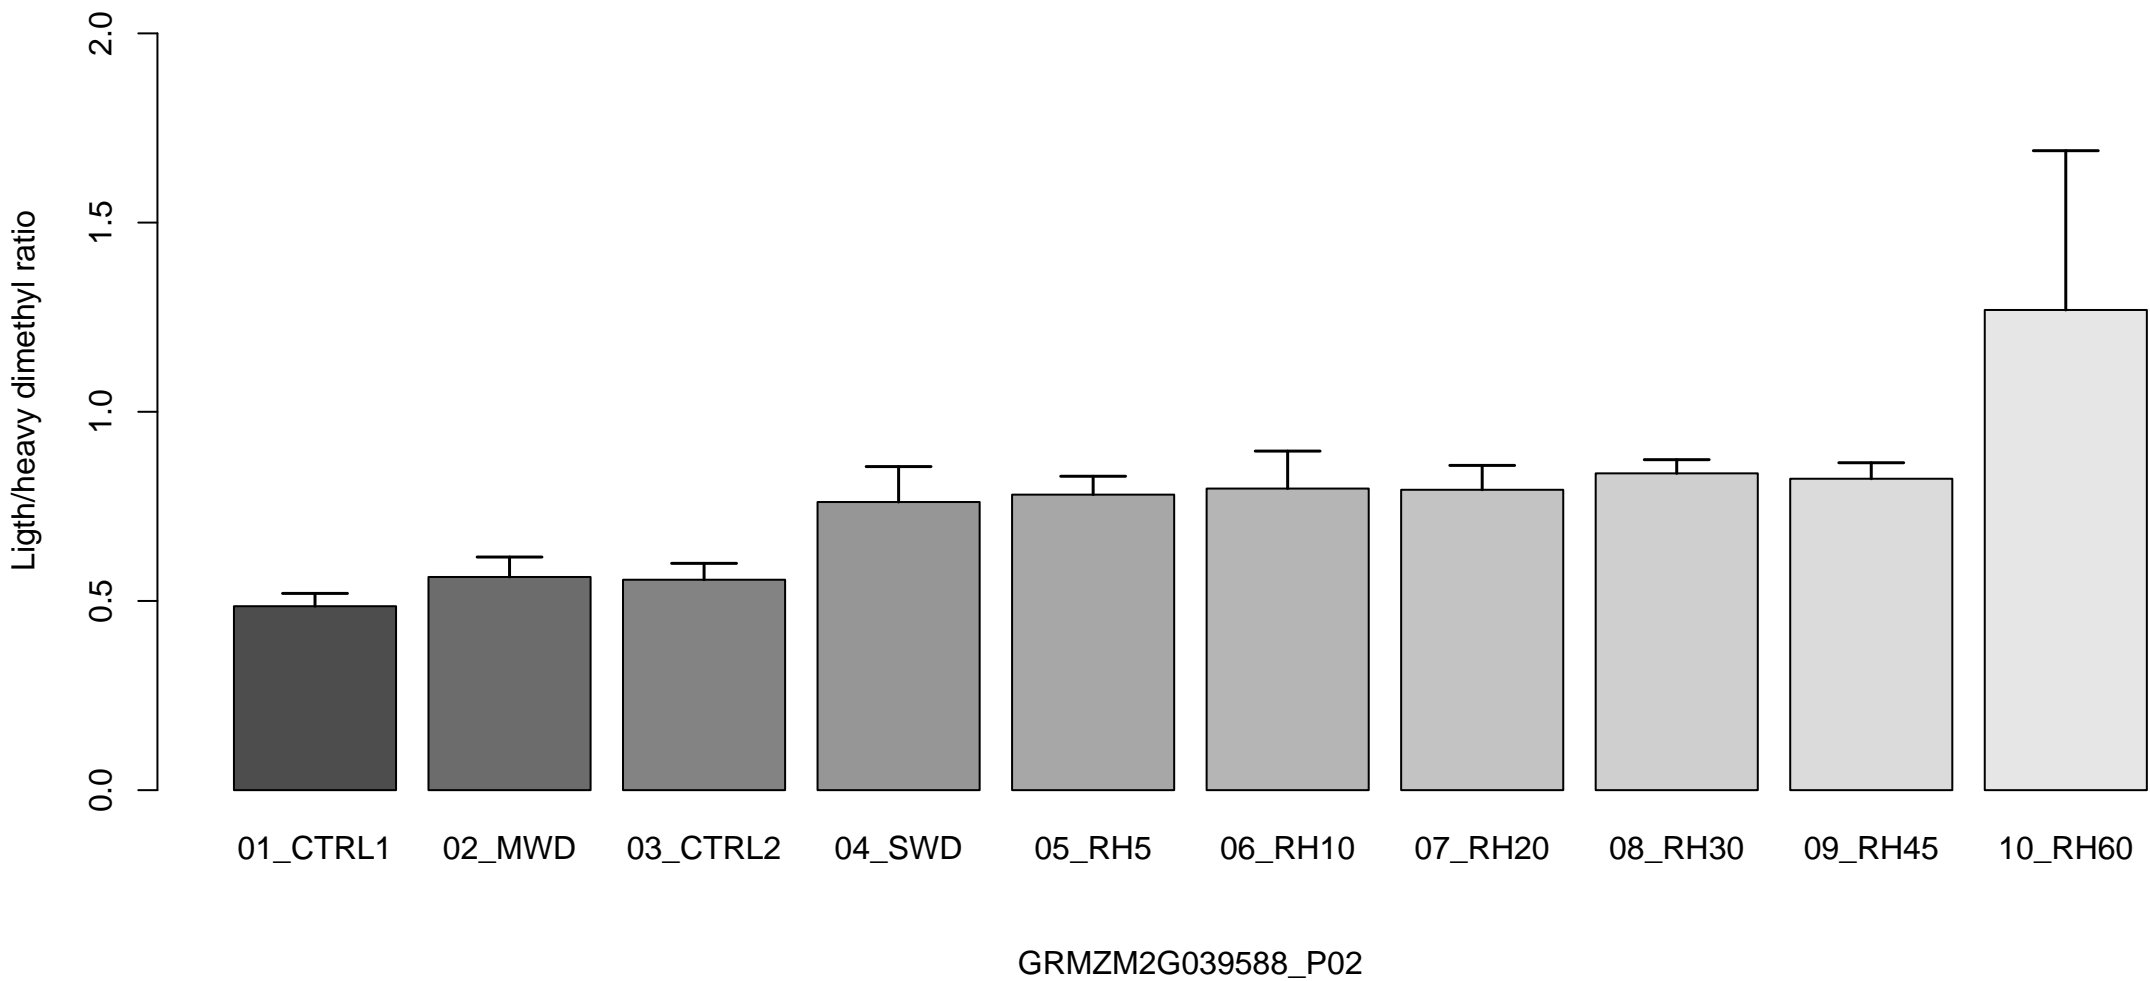

### Proline-rich cell wall protein-like # S49

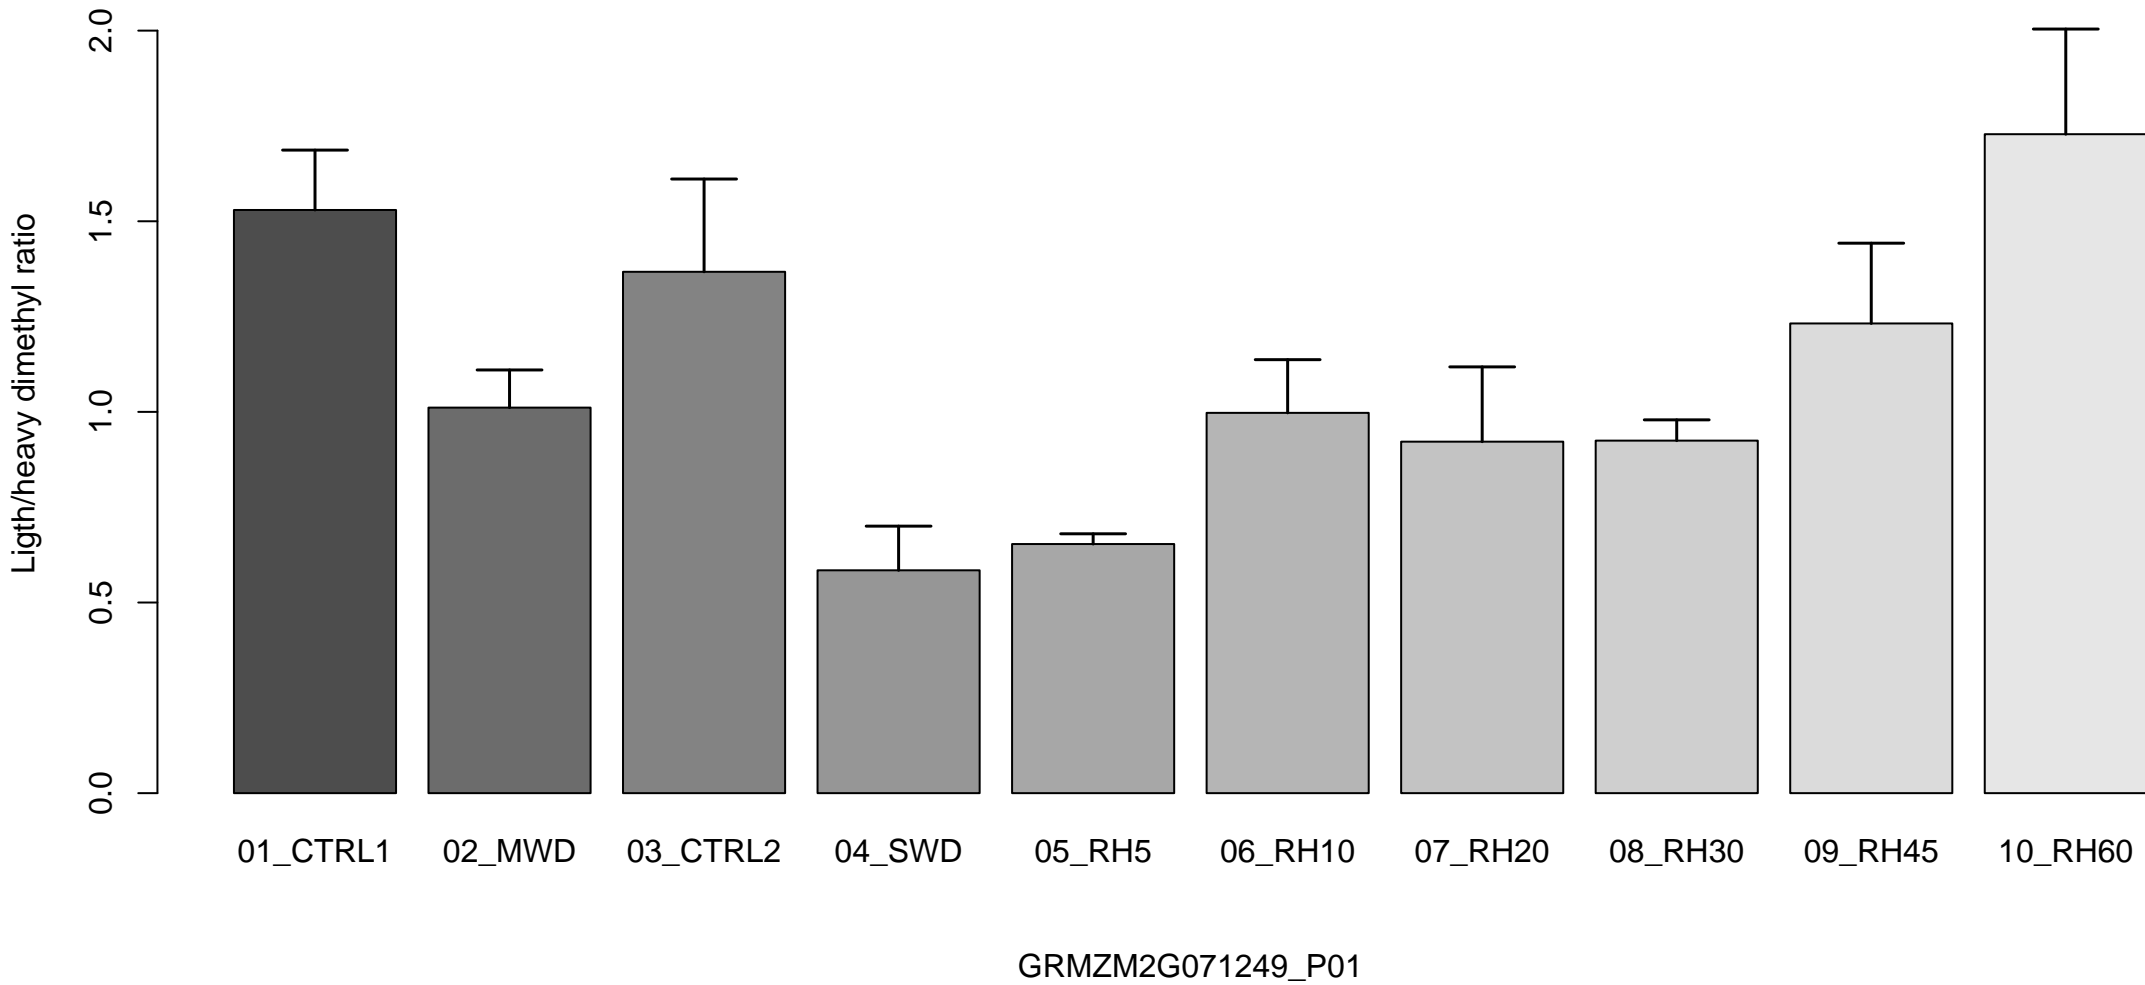

### Putative eukaryotic translation initiation factor 4G # S183

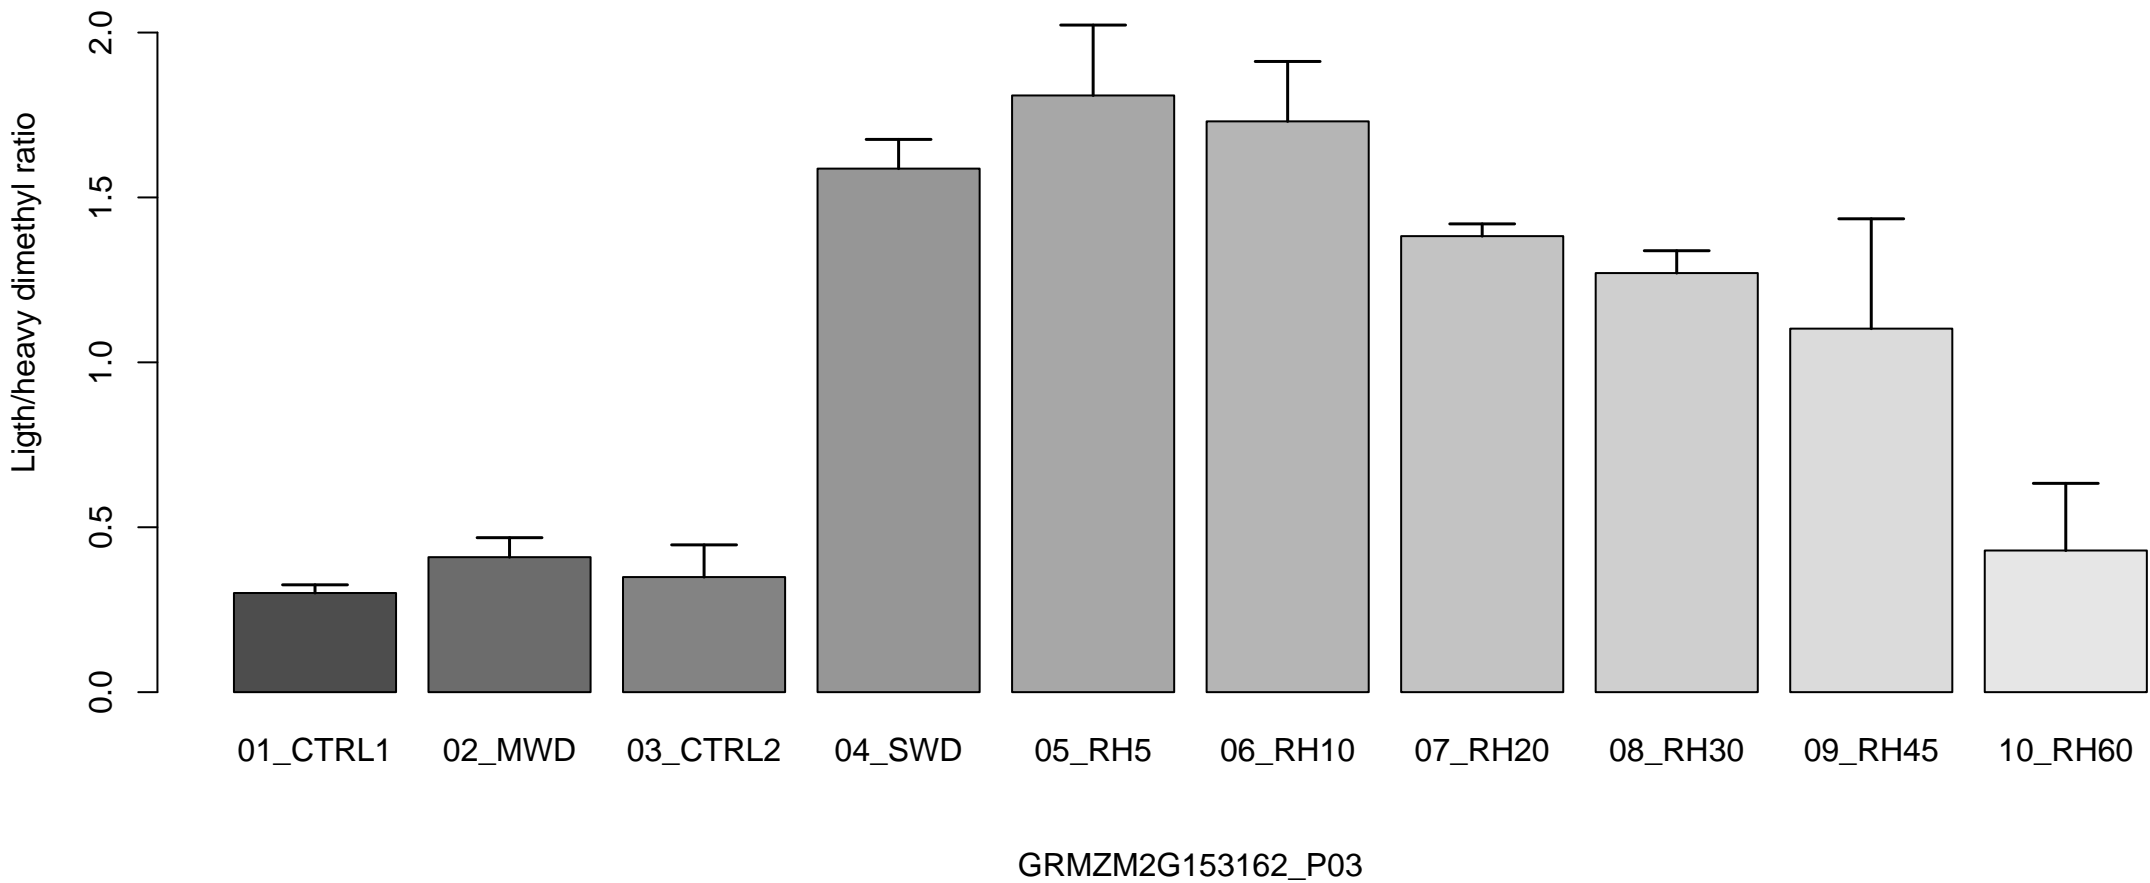

### Villin-3, putative, expressed # S900/T902

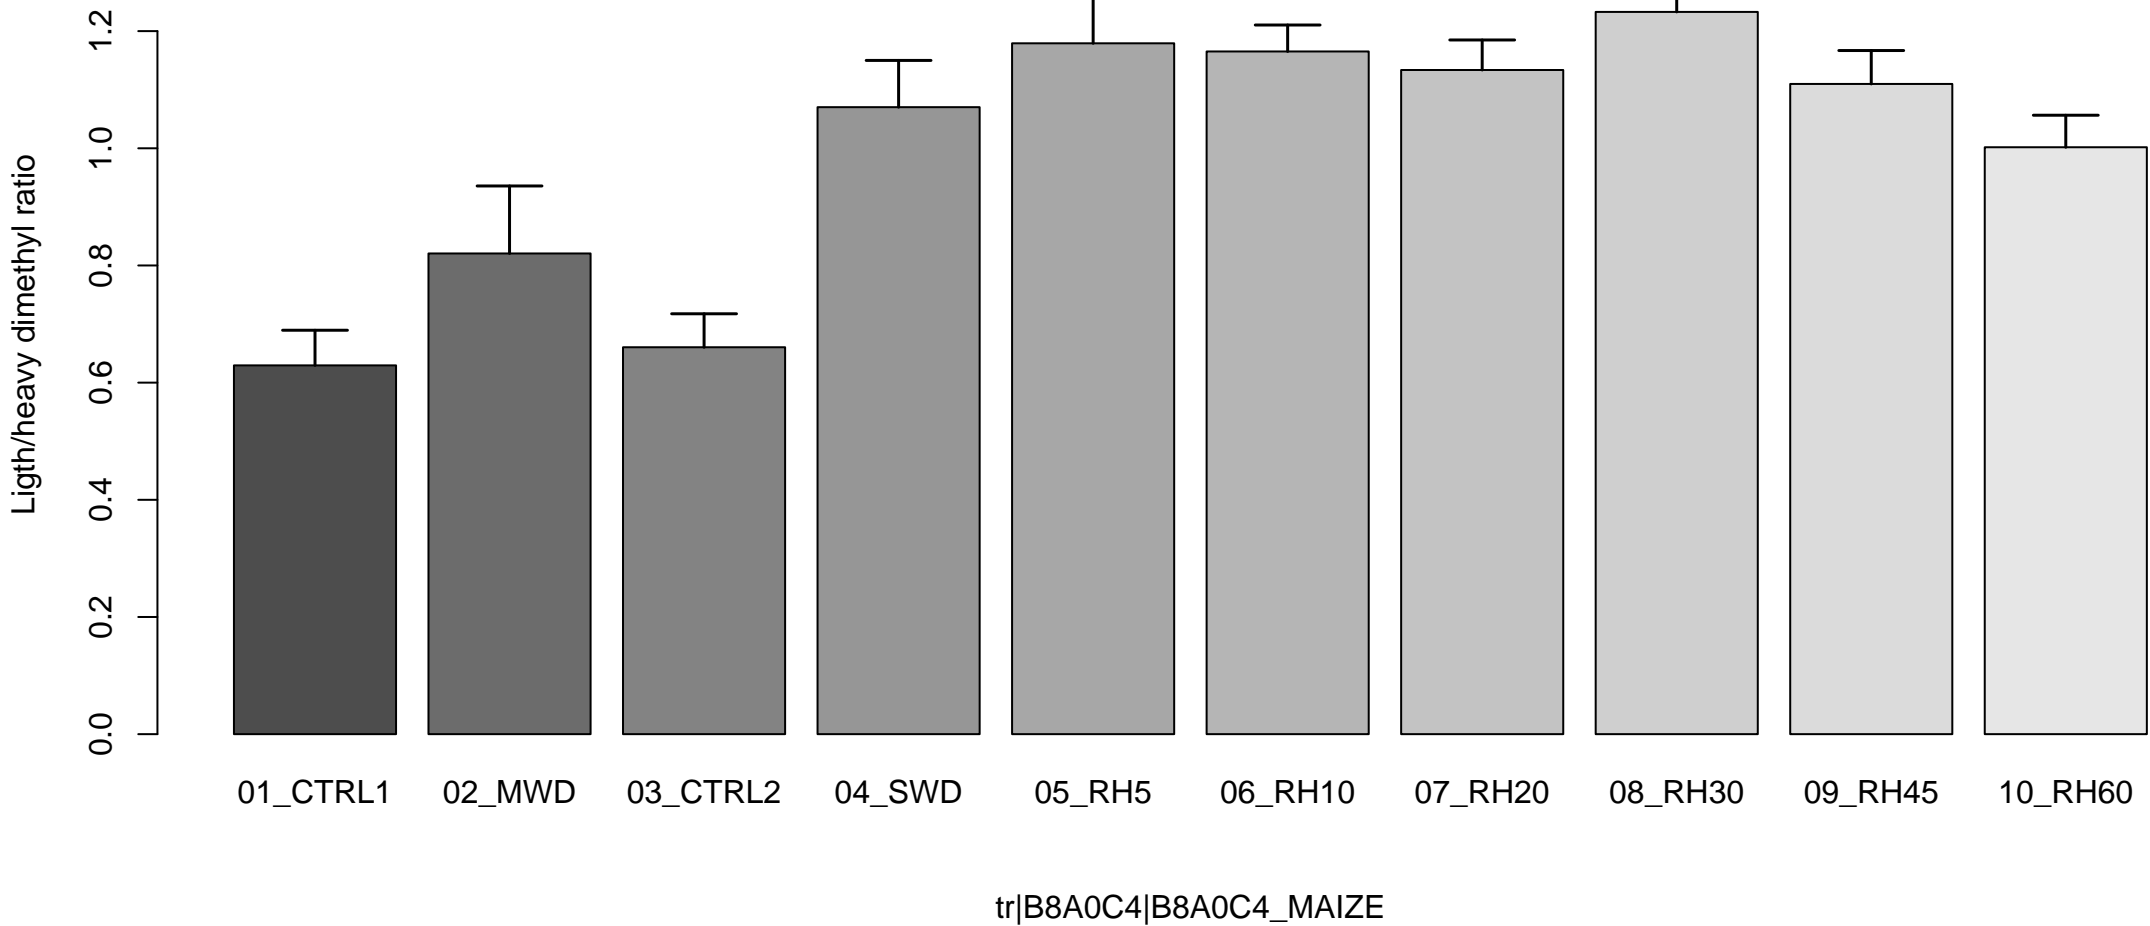



### Ninja-family protein 6 # S83

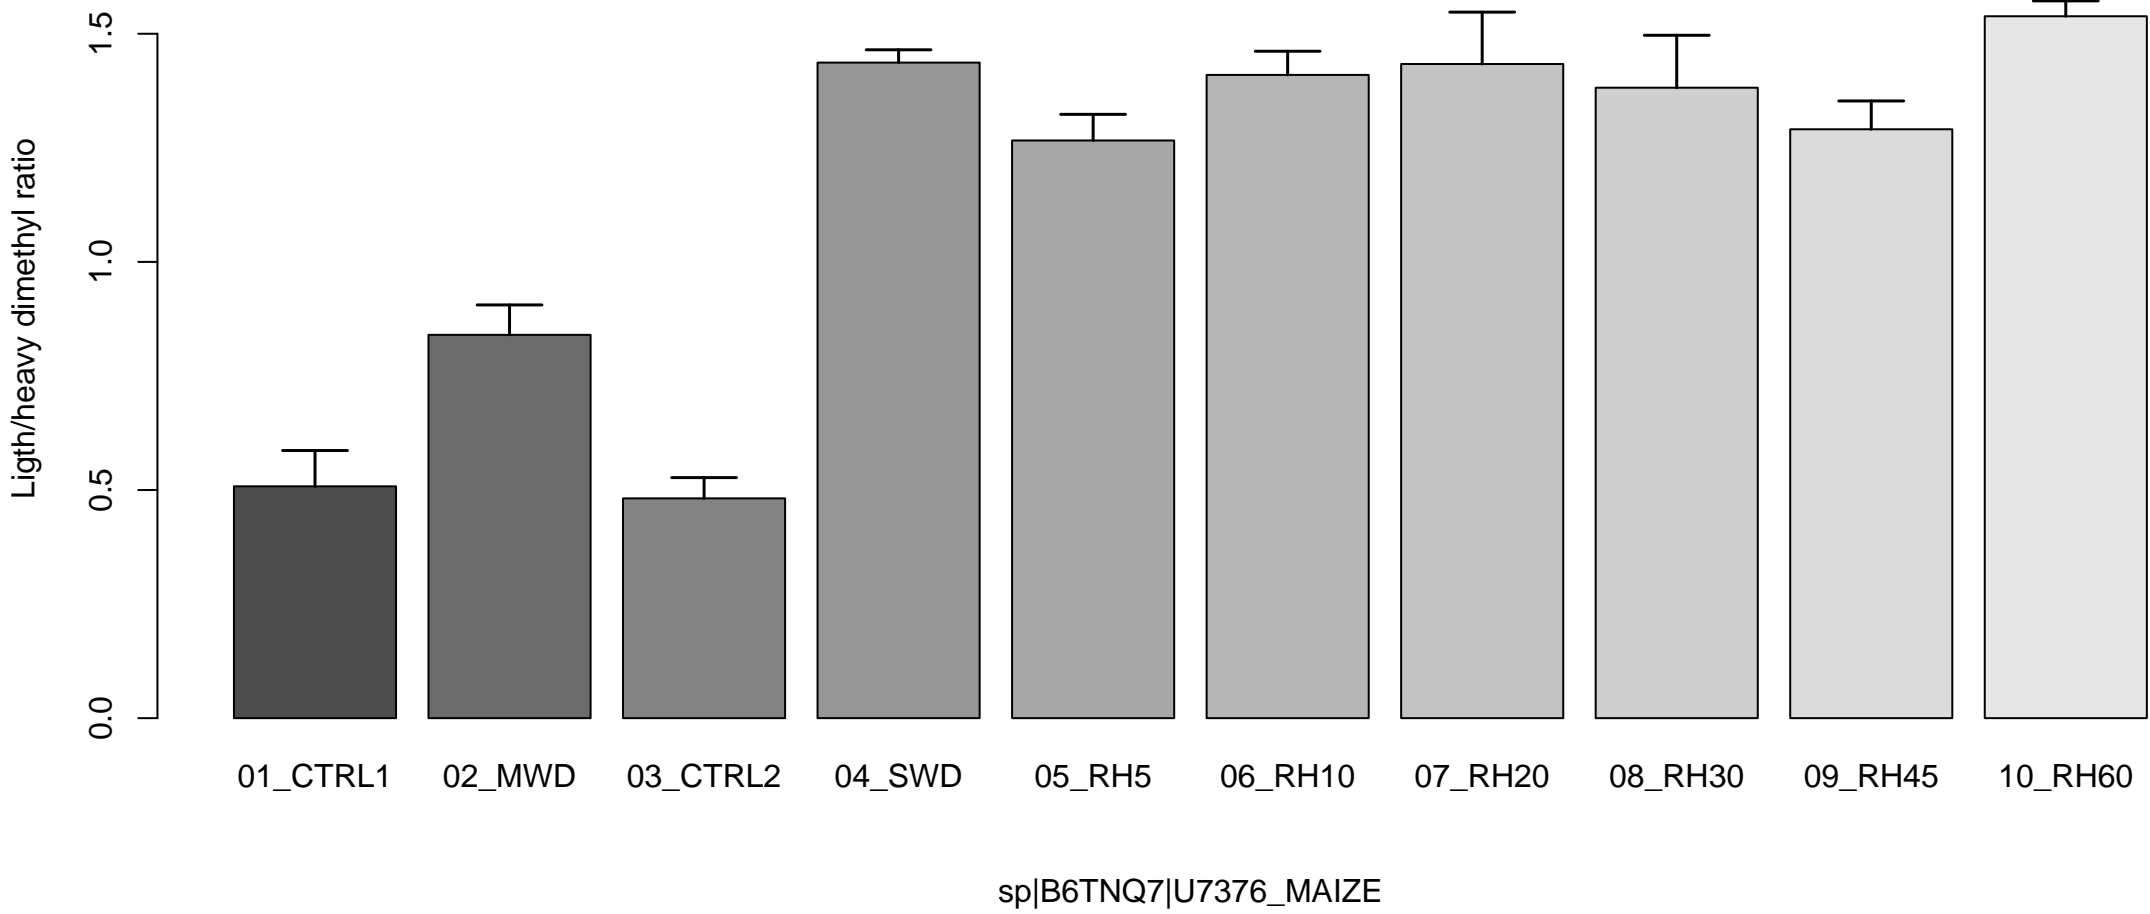

### Serine/threonine-protein kinase PBS1, putative # S157, S161

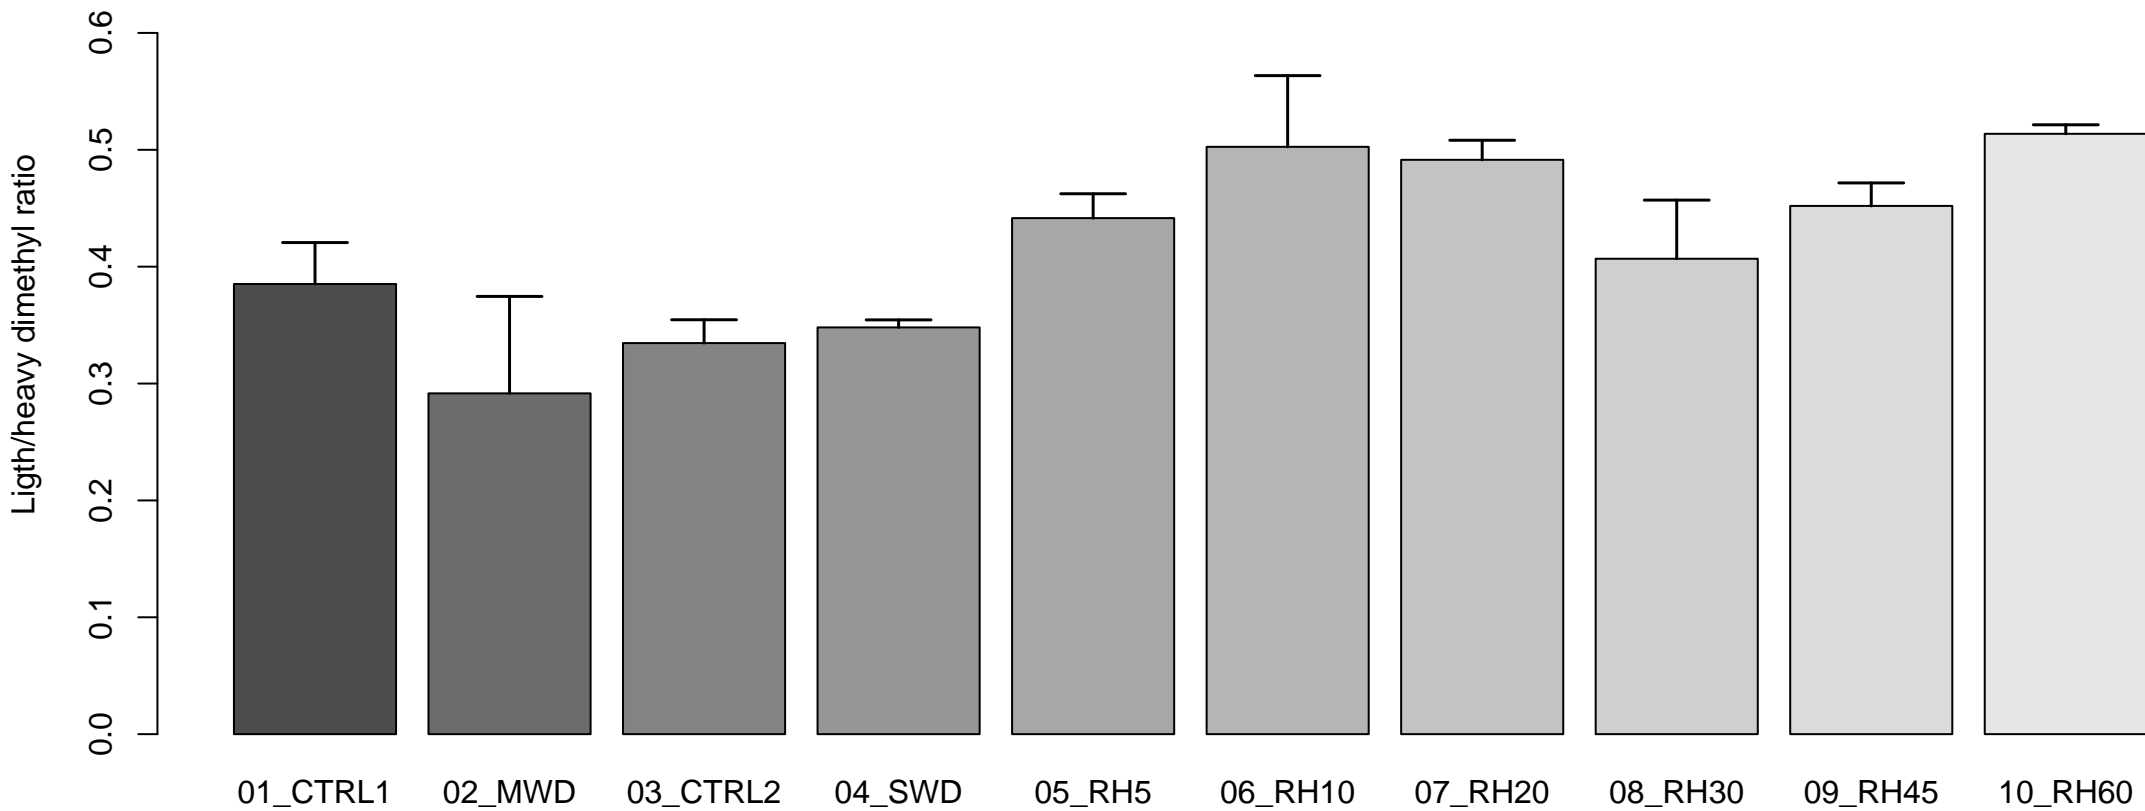

GRMZM2G334165\_P03

# Phosphoglucomutase, cytoplasmic 2 # S106

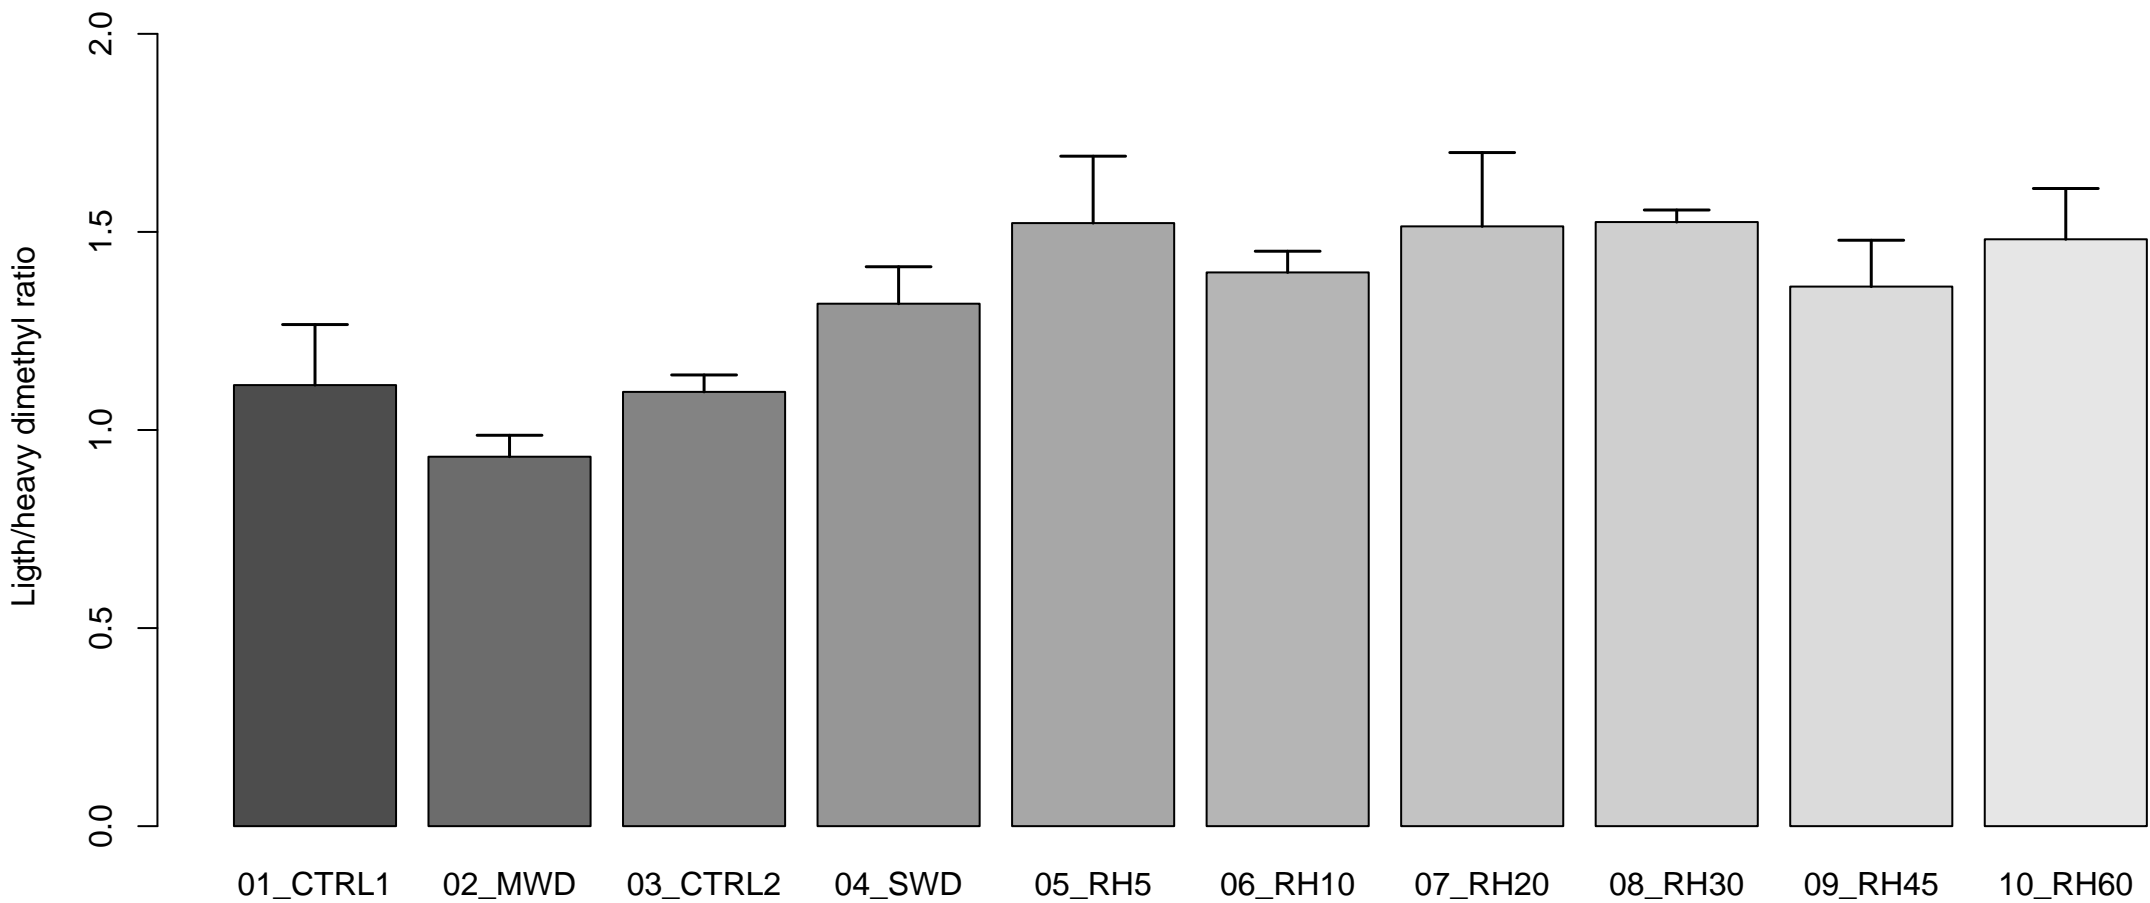

GRMZM2G023289\_P03

### AAA-type ATPase family protein # S217

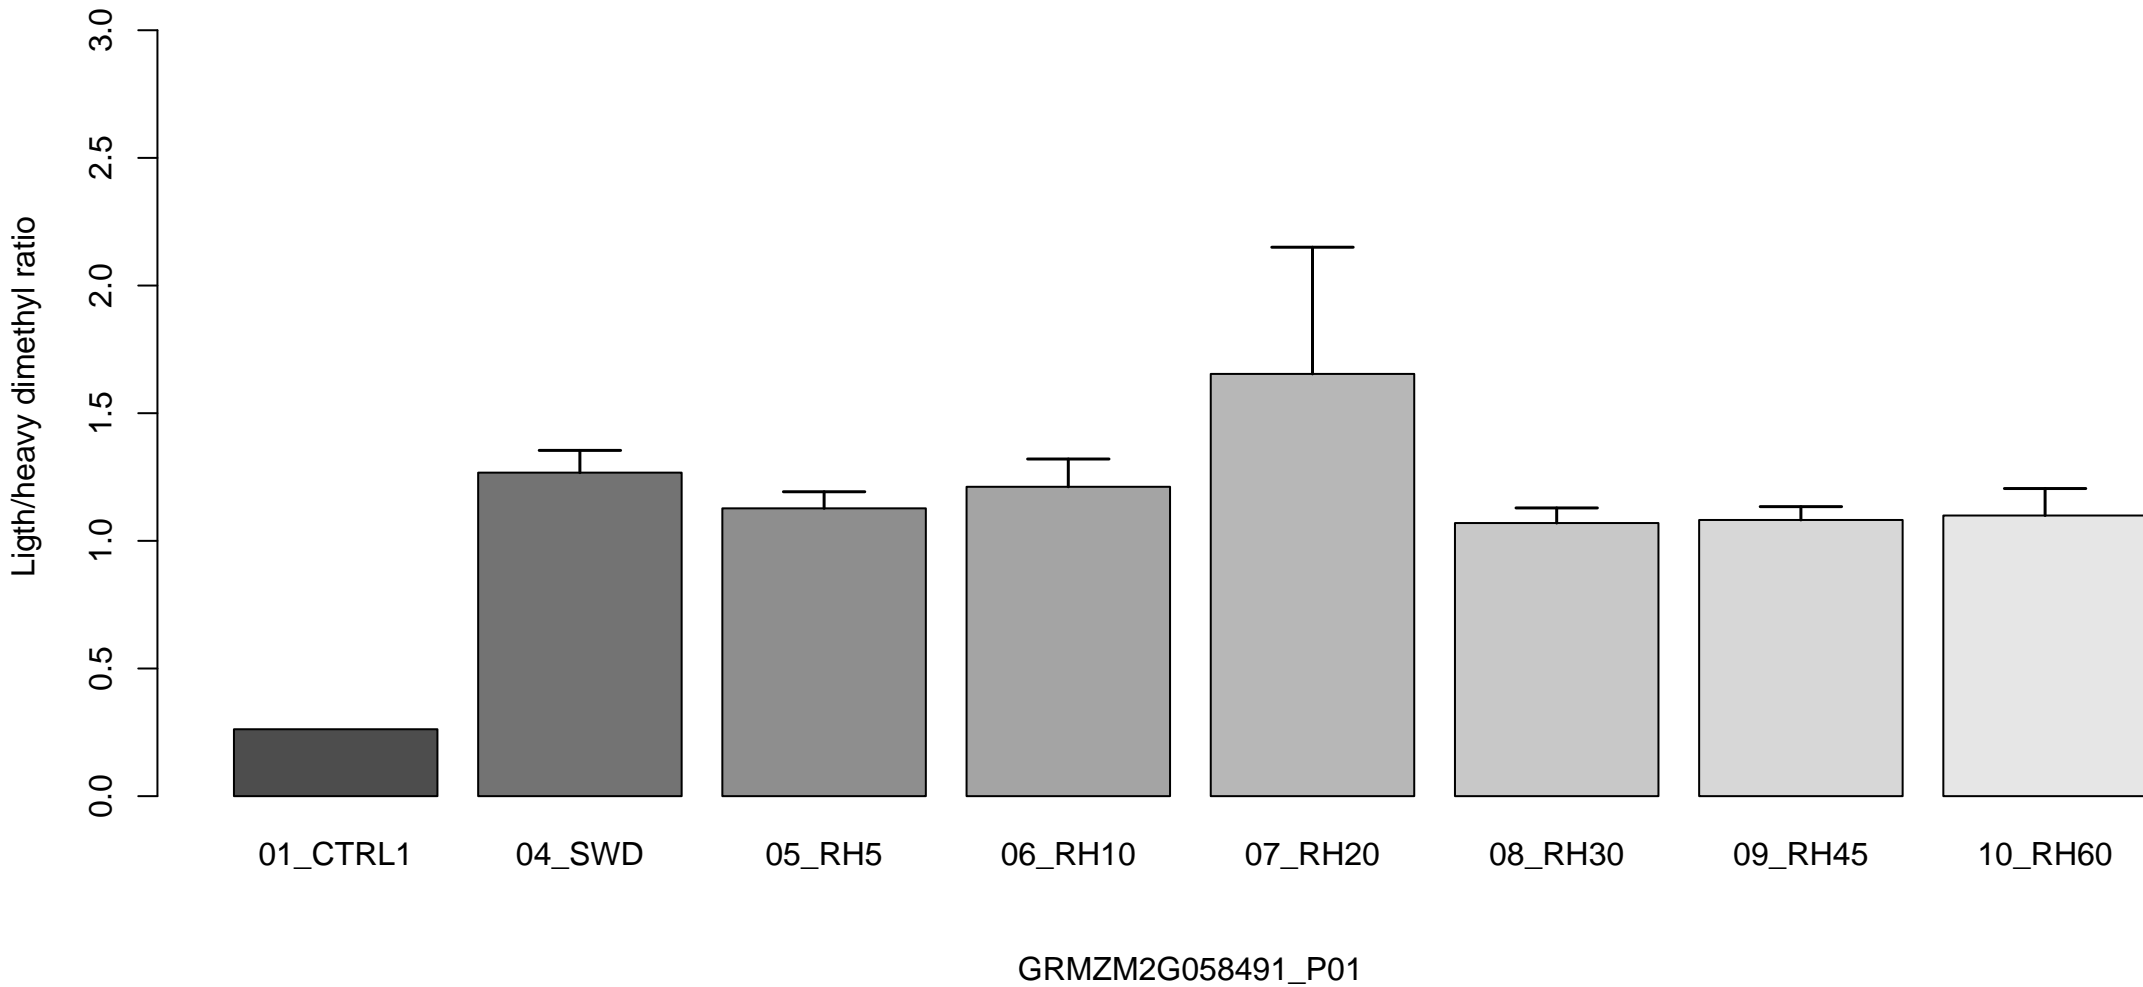

### AAA-type ATPase family protein # S205

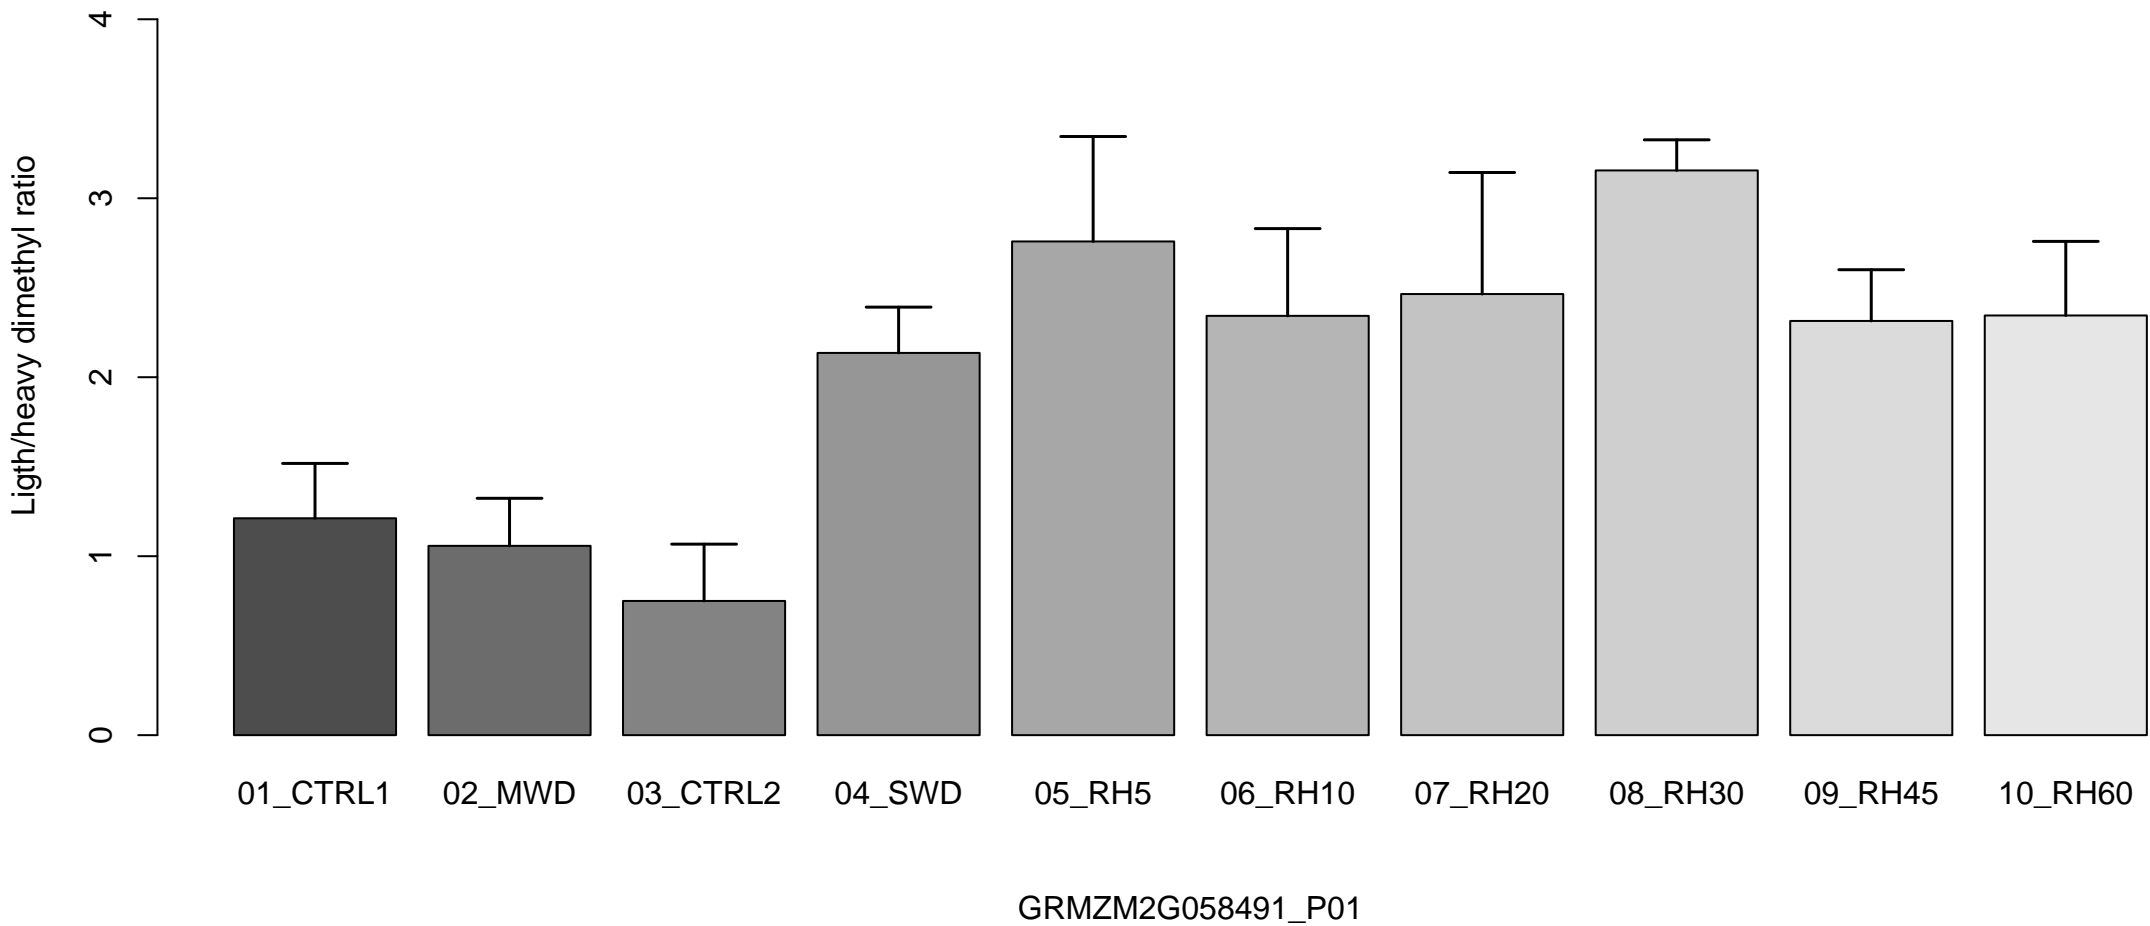

### AAA-type ATPase family protein # S162

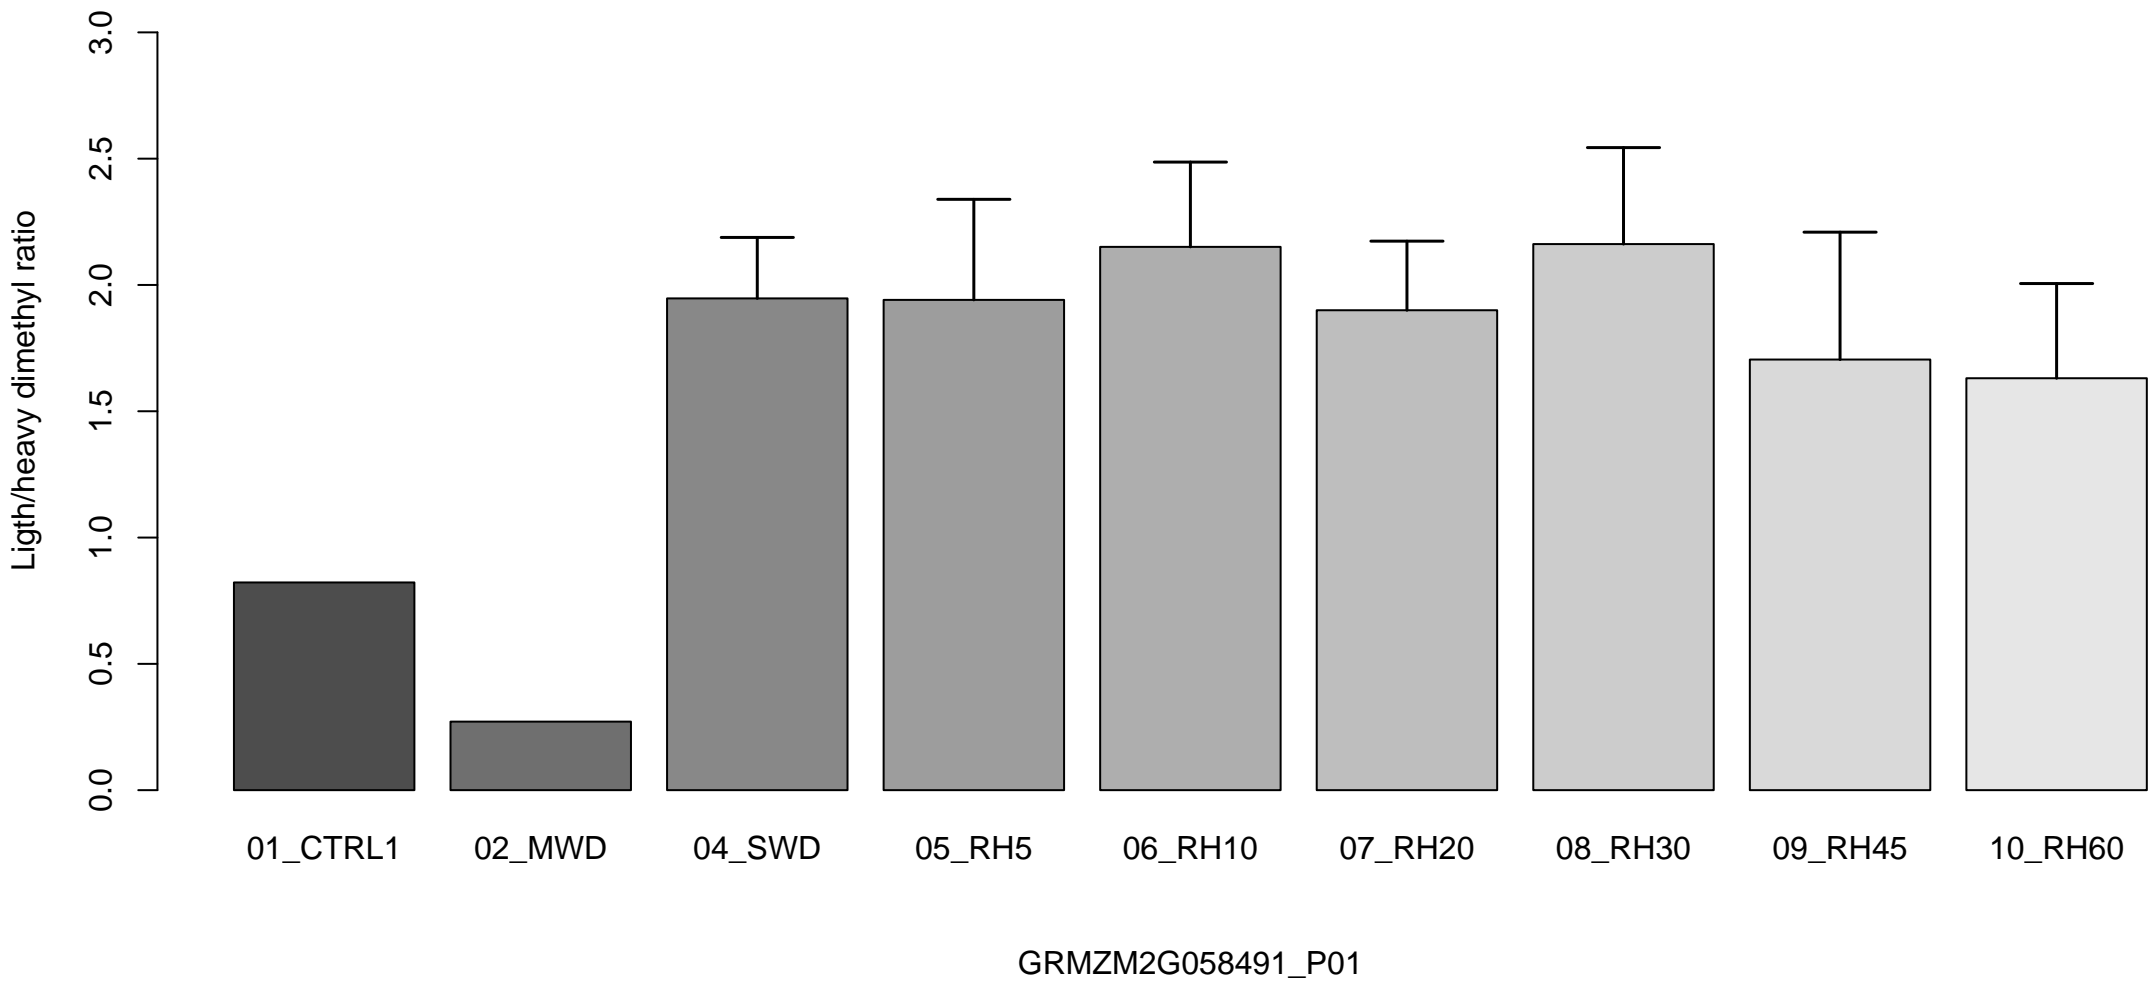

### C2 domain containing protein # S401

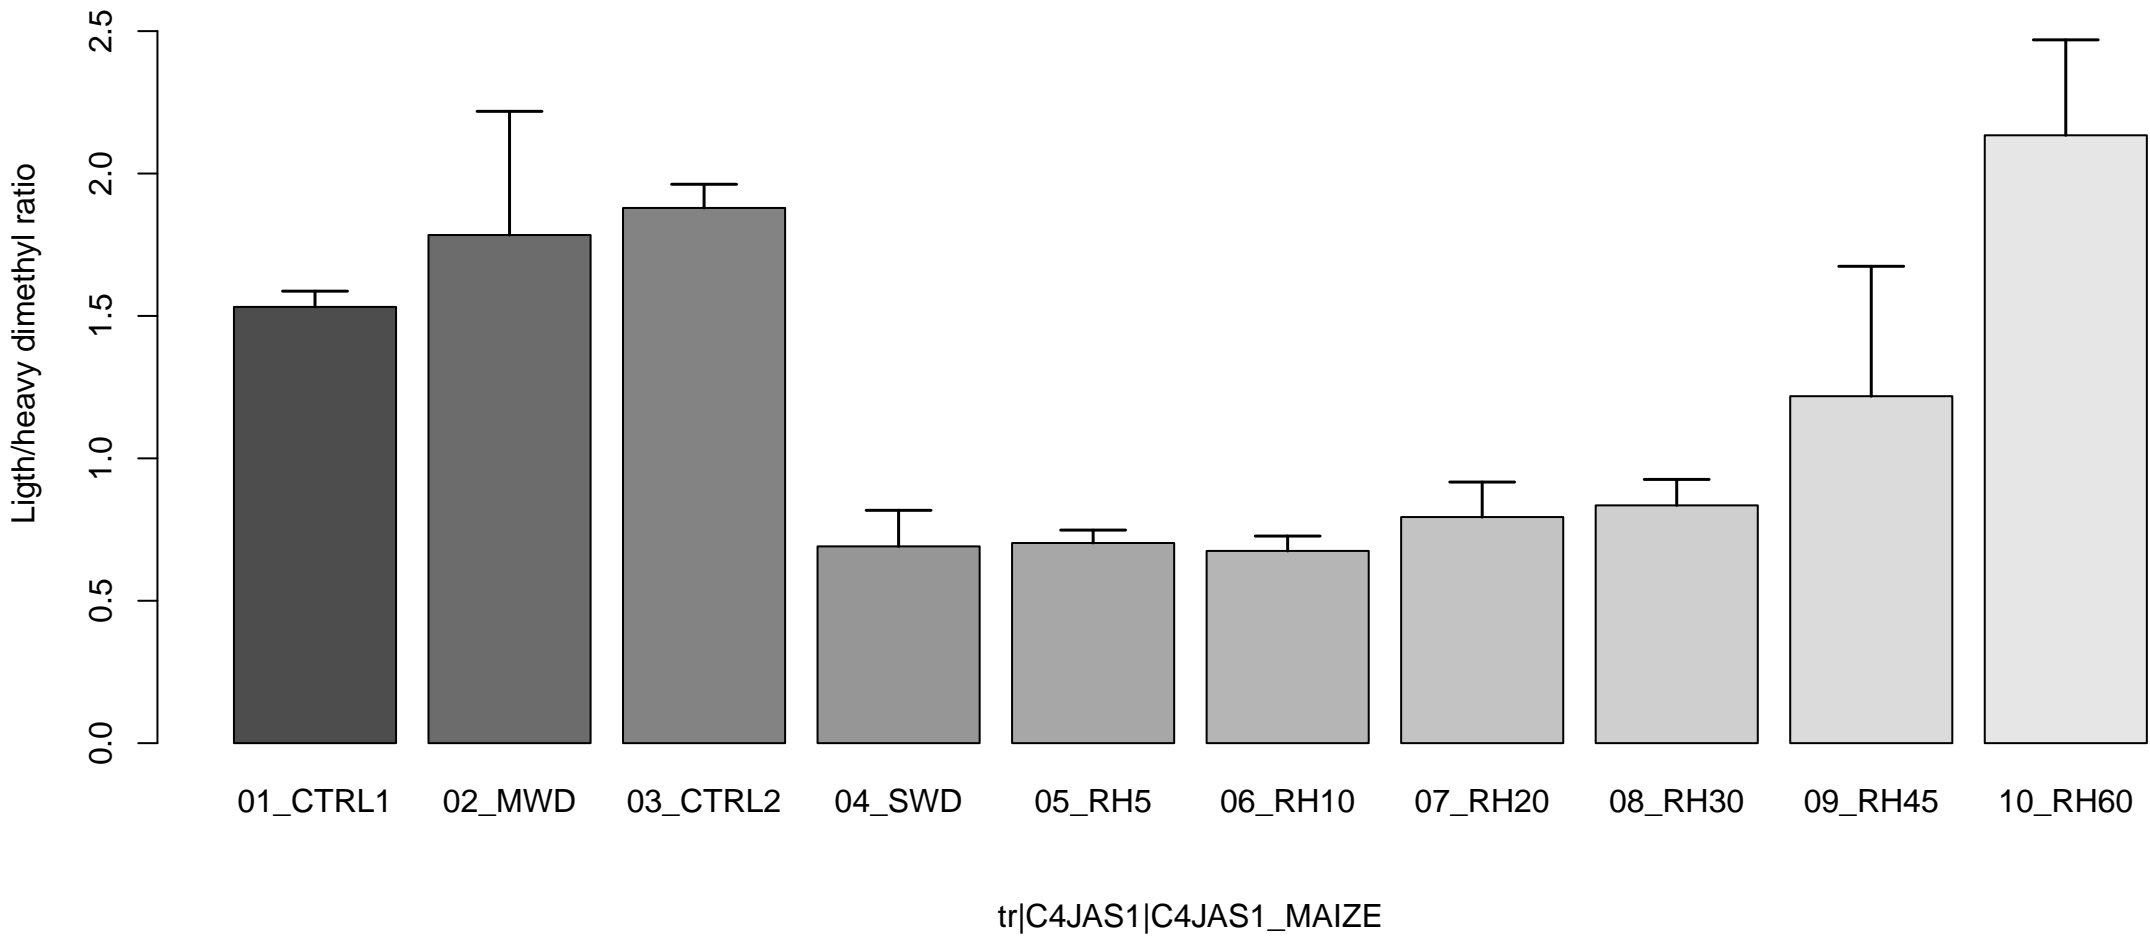

# Golgi SNARE 12 protein # S56

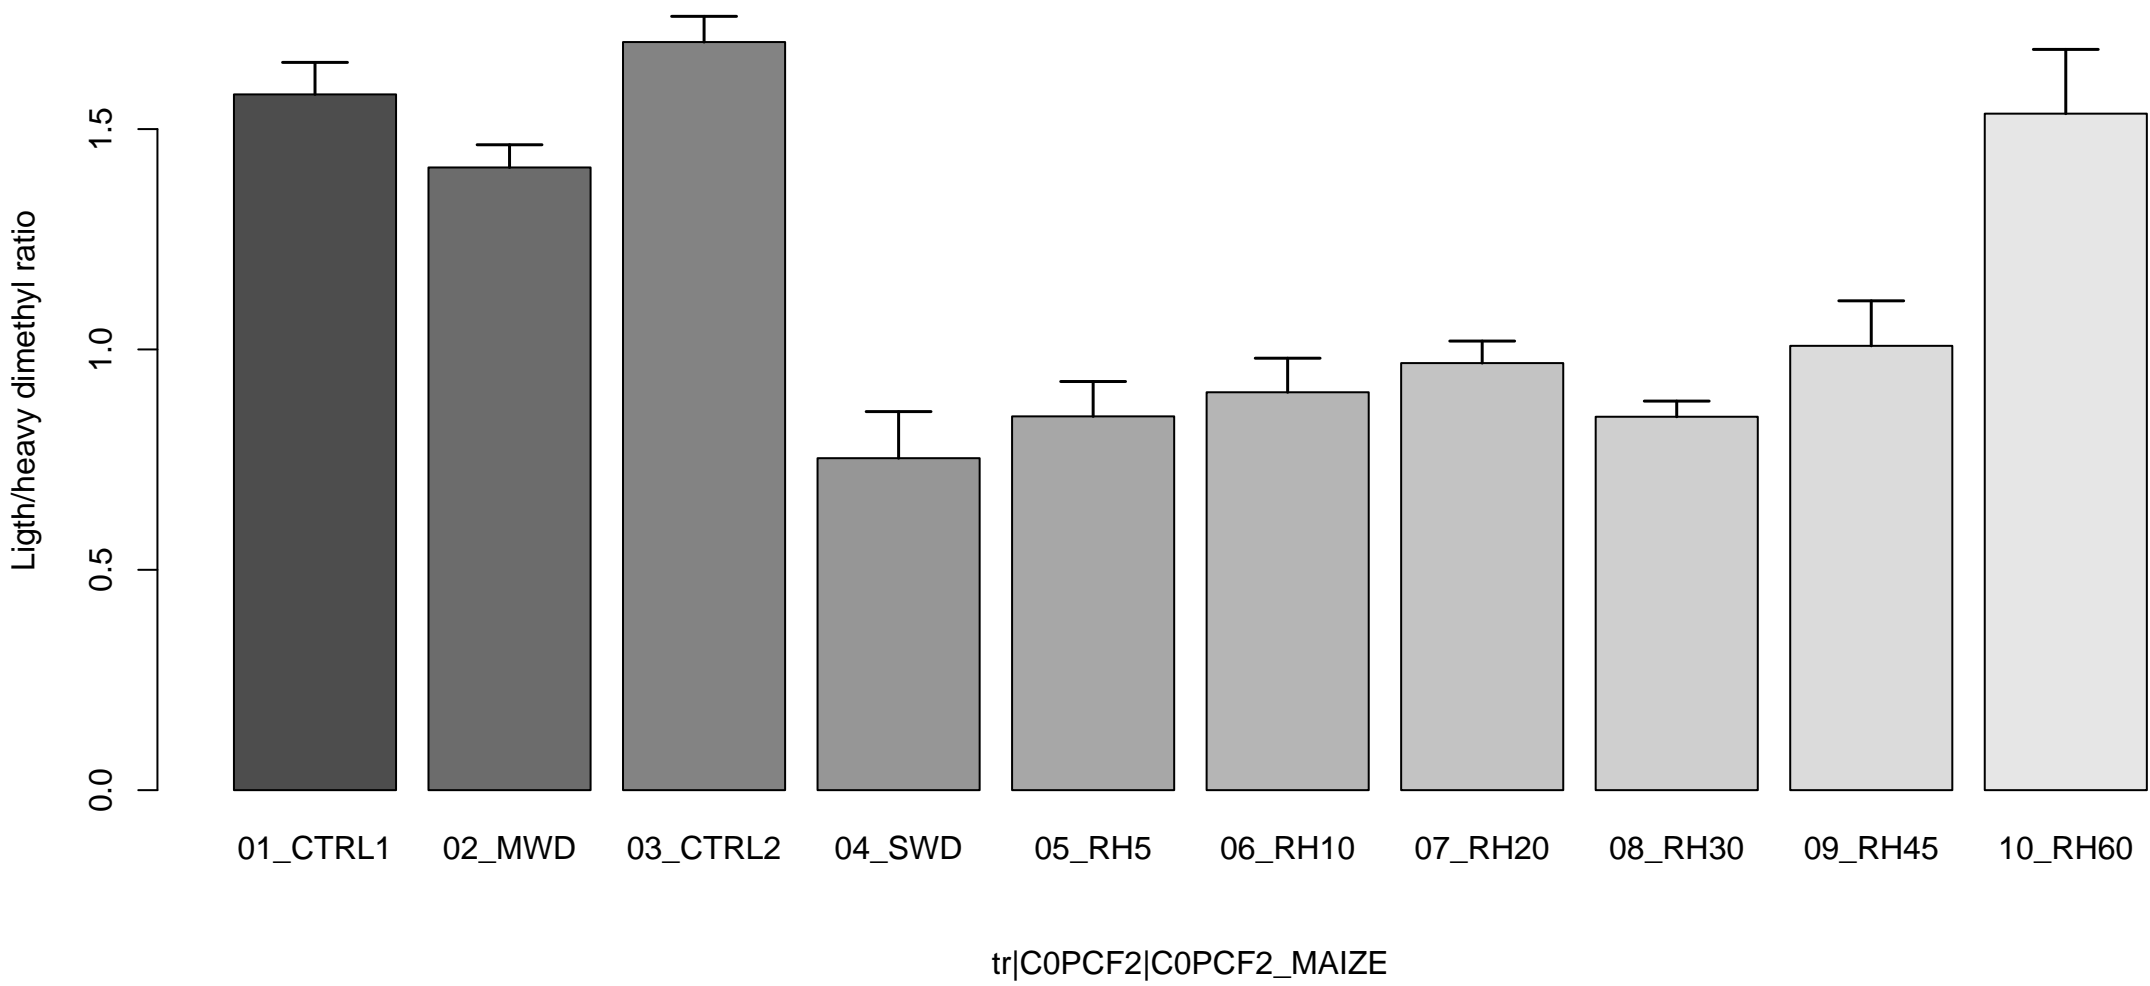



Ninja-family protein 5 # S105

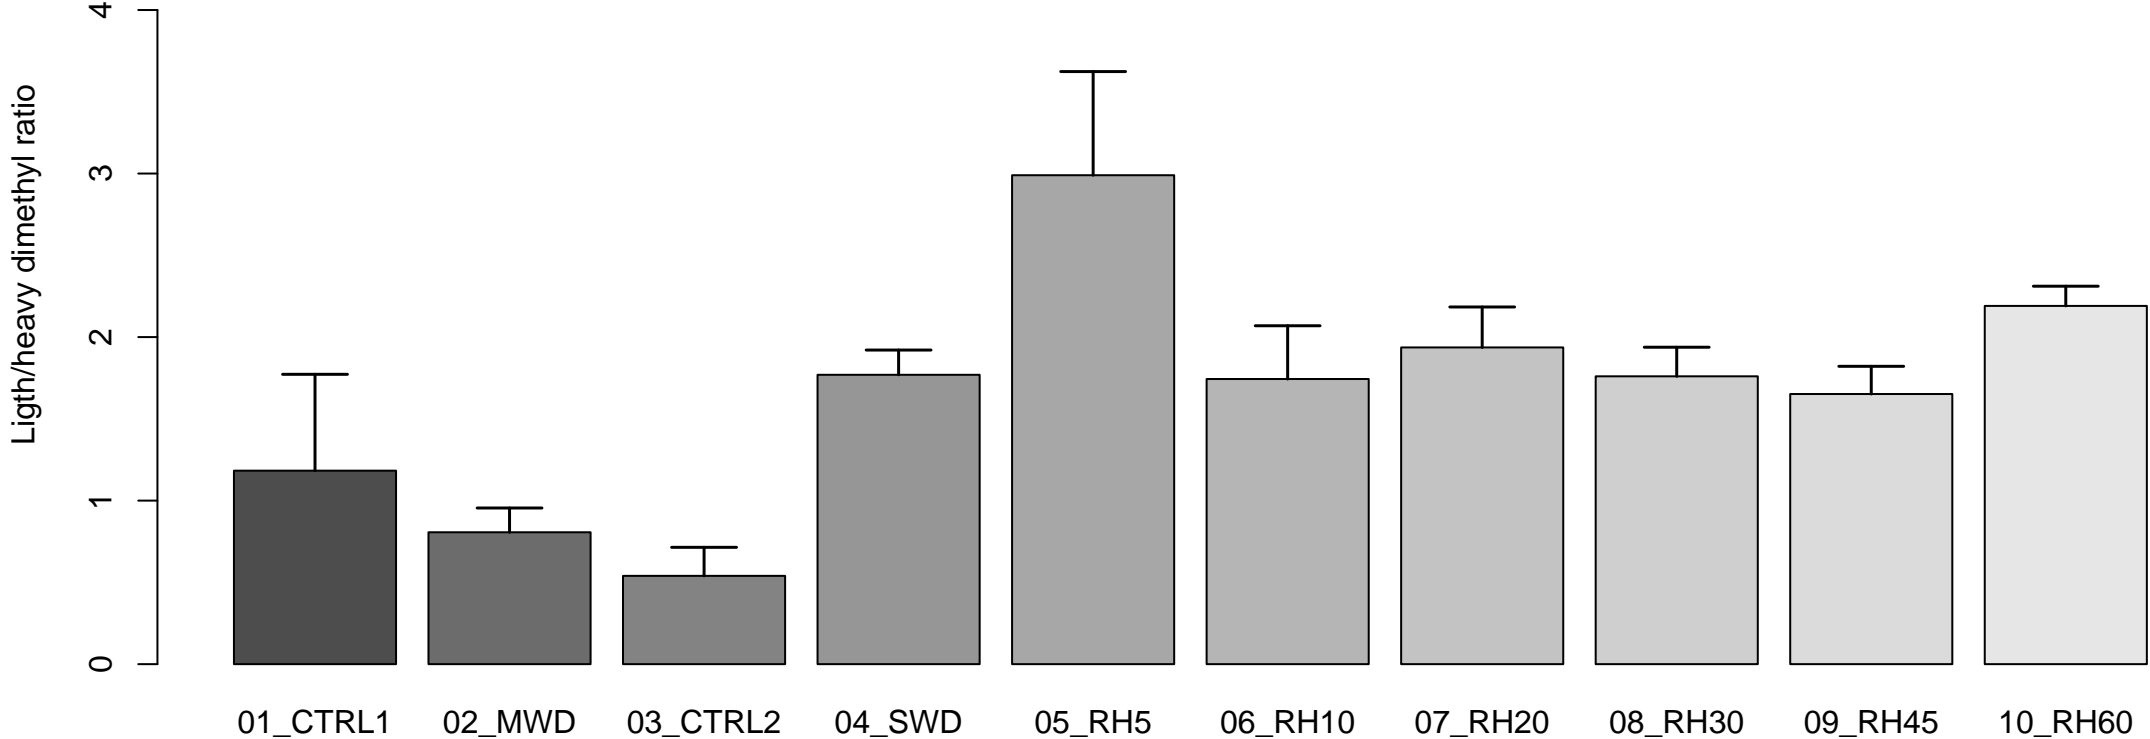

GRMZM2G438290\_P01

### Putative pumilio/Mpt5 family RNA-binding protein # S210

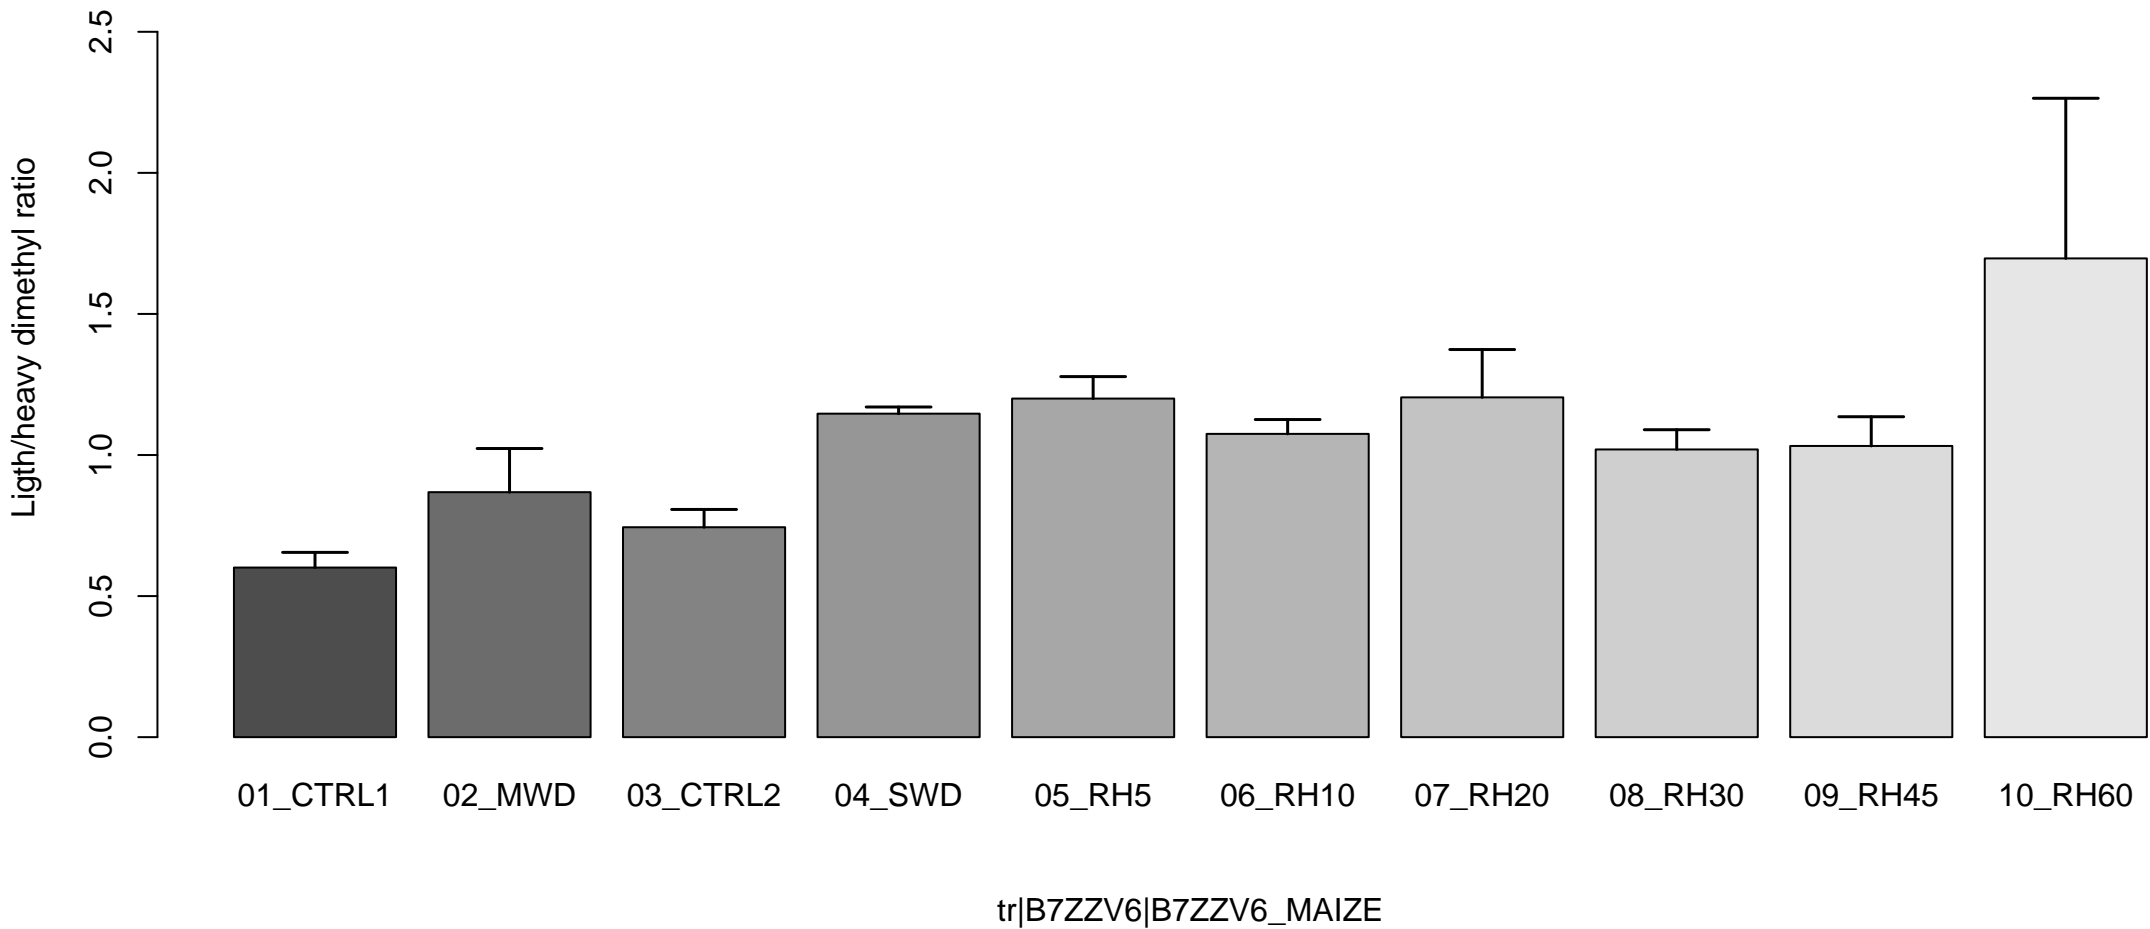

### Sel1-like repeat # S620/S643

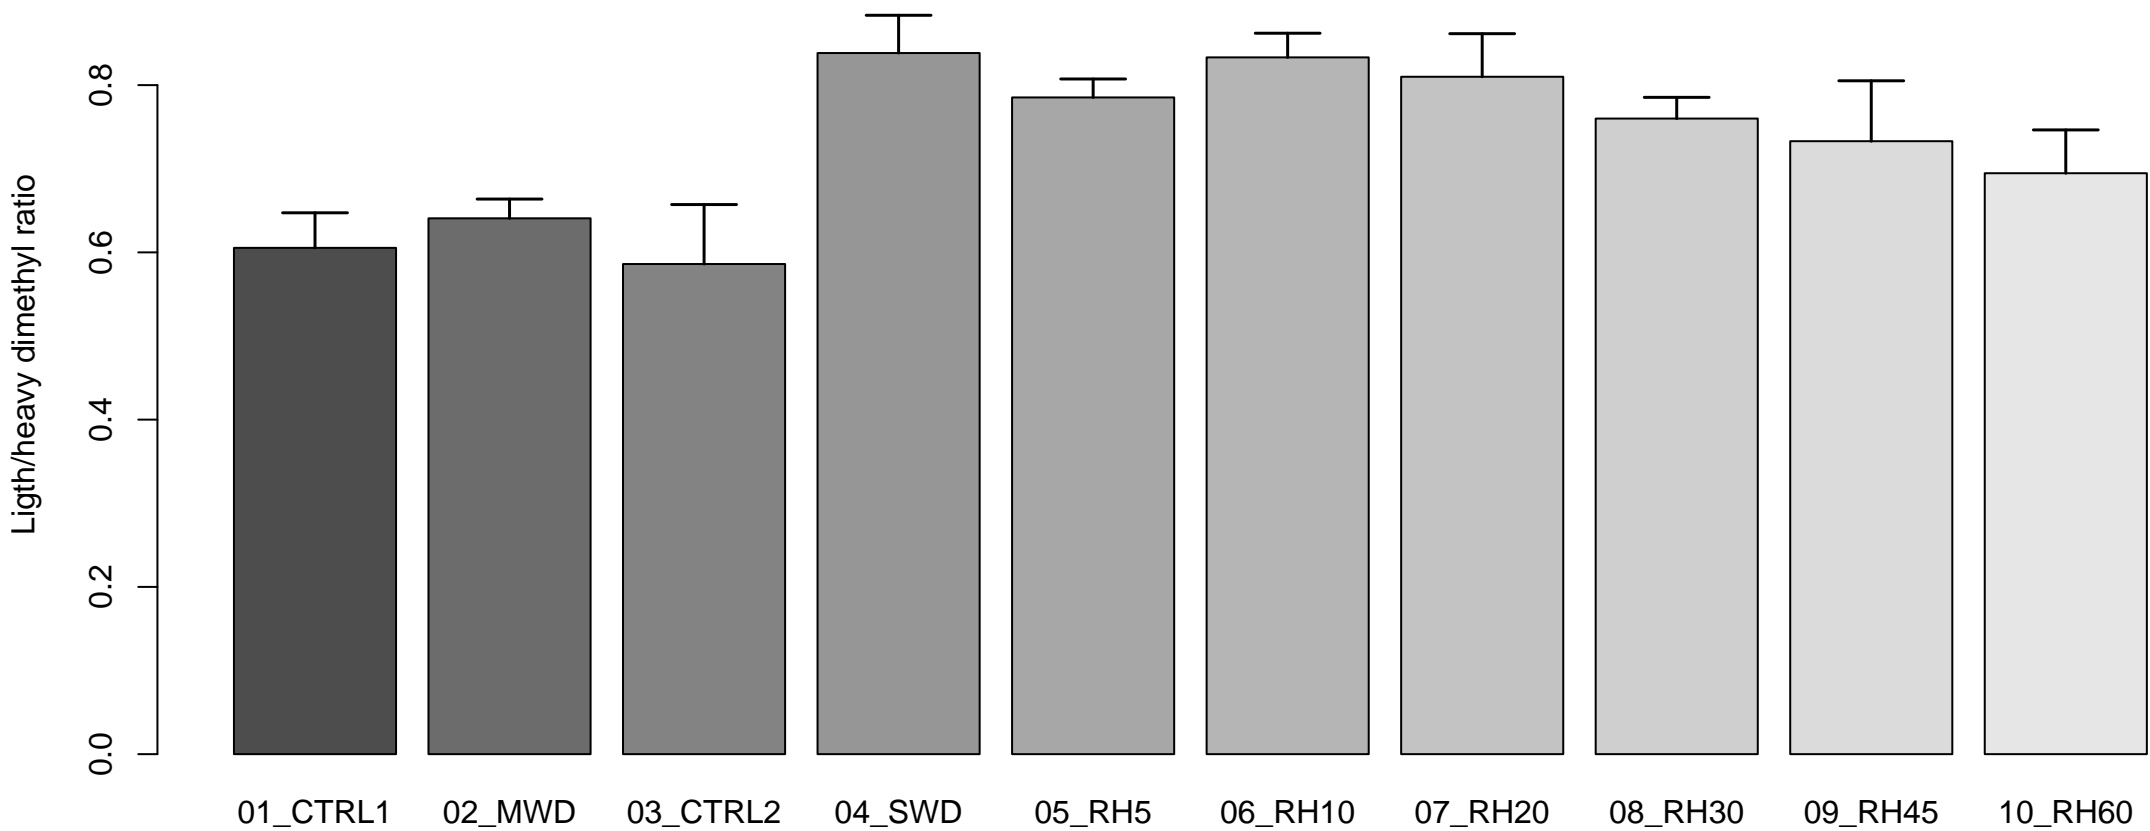

GRMZM2G133016\_P01

### Putative pumilio/Mpt5 family RNA-binding protein # S249/S250

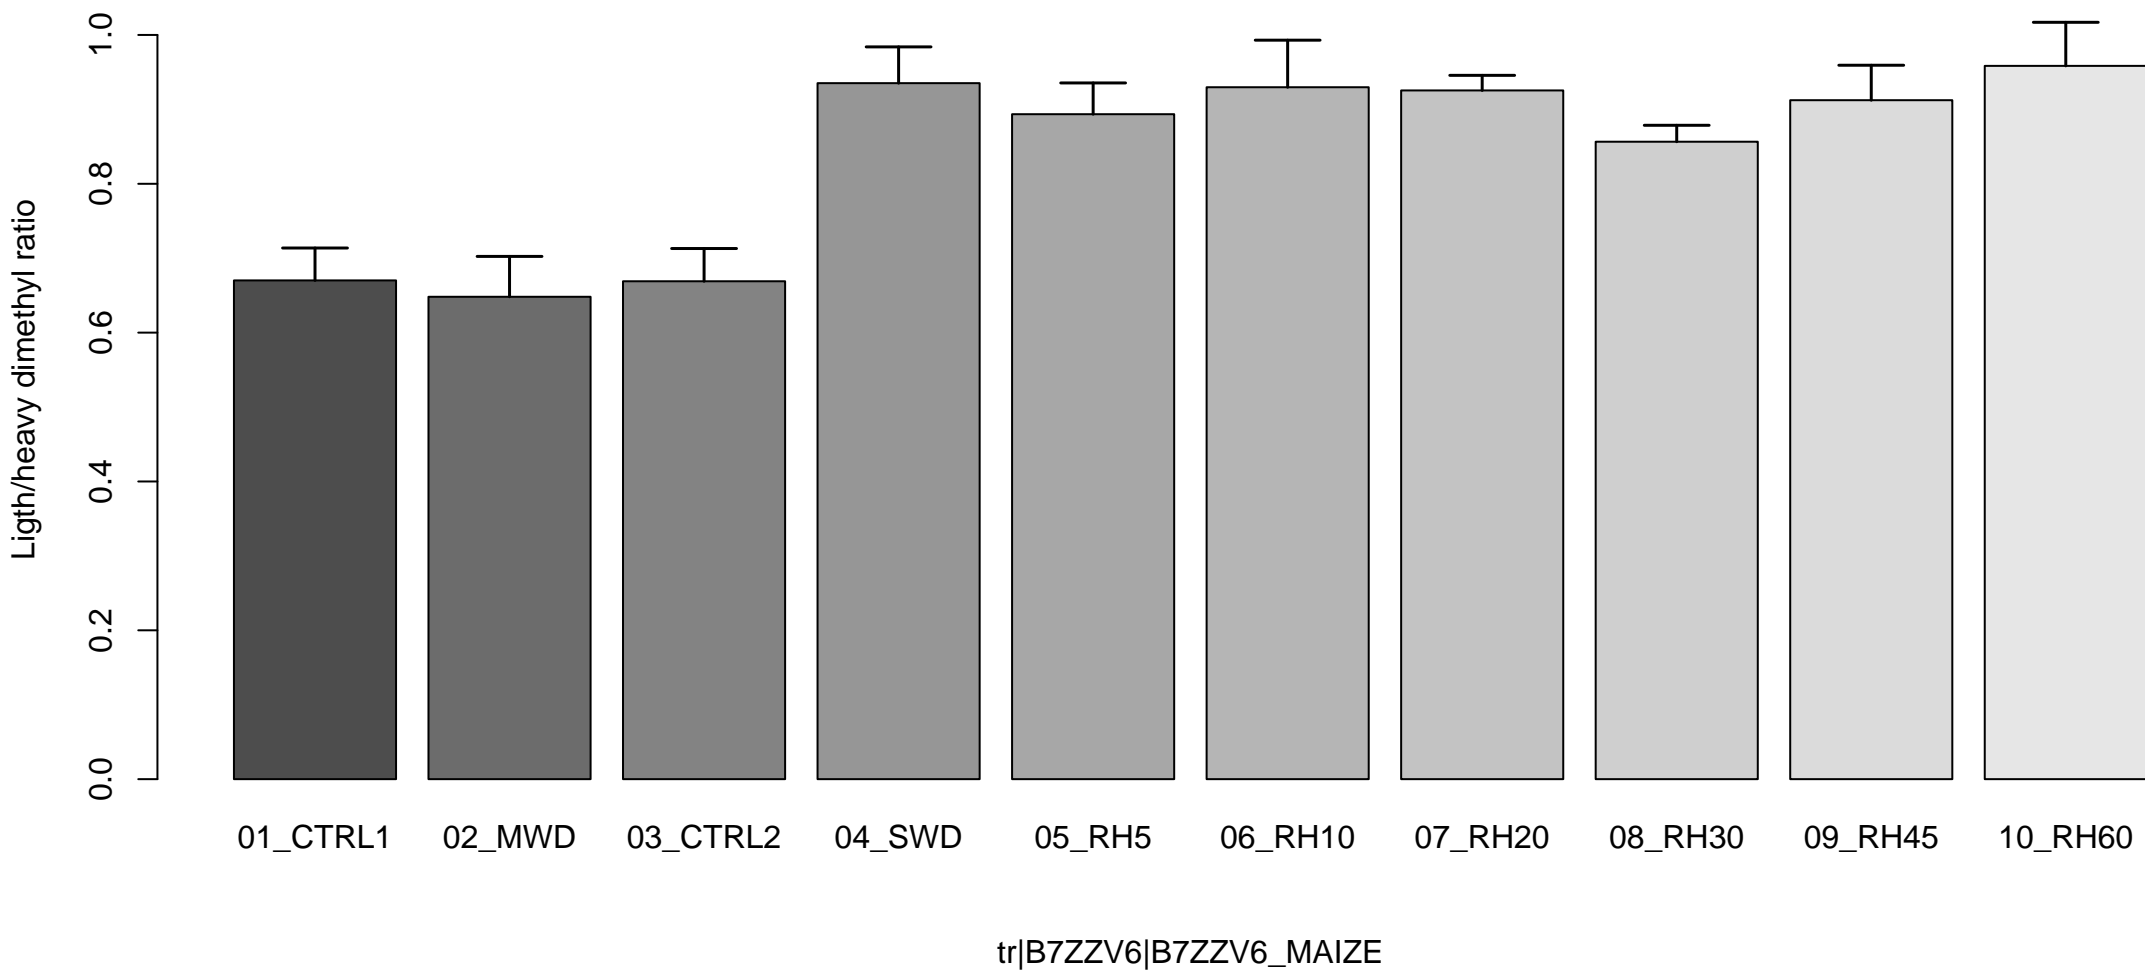

### Putative pumilio/Mpt5 family RNA-binding protein # S245/S246/S247

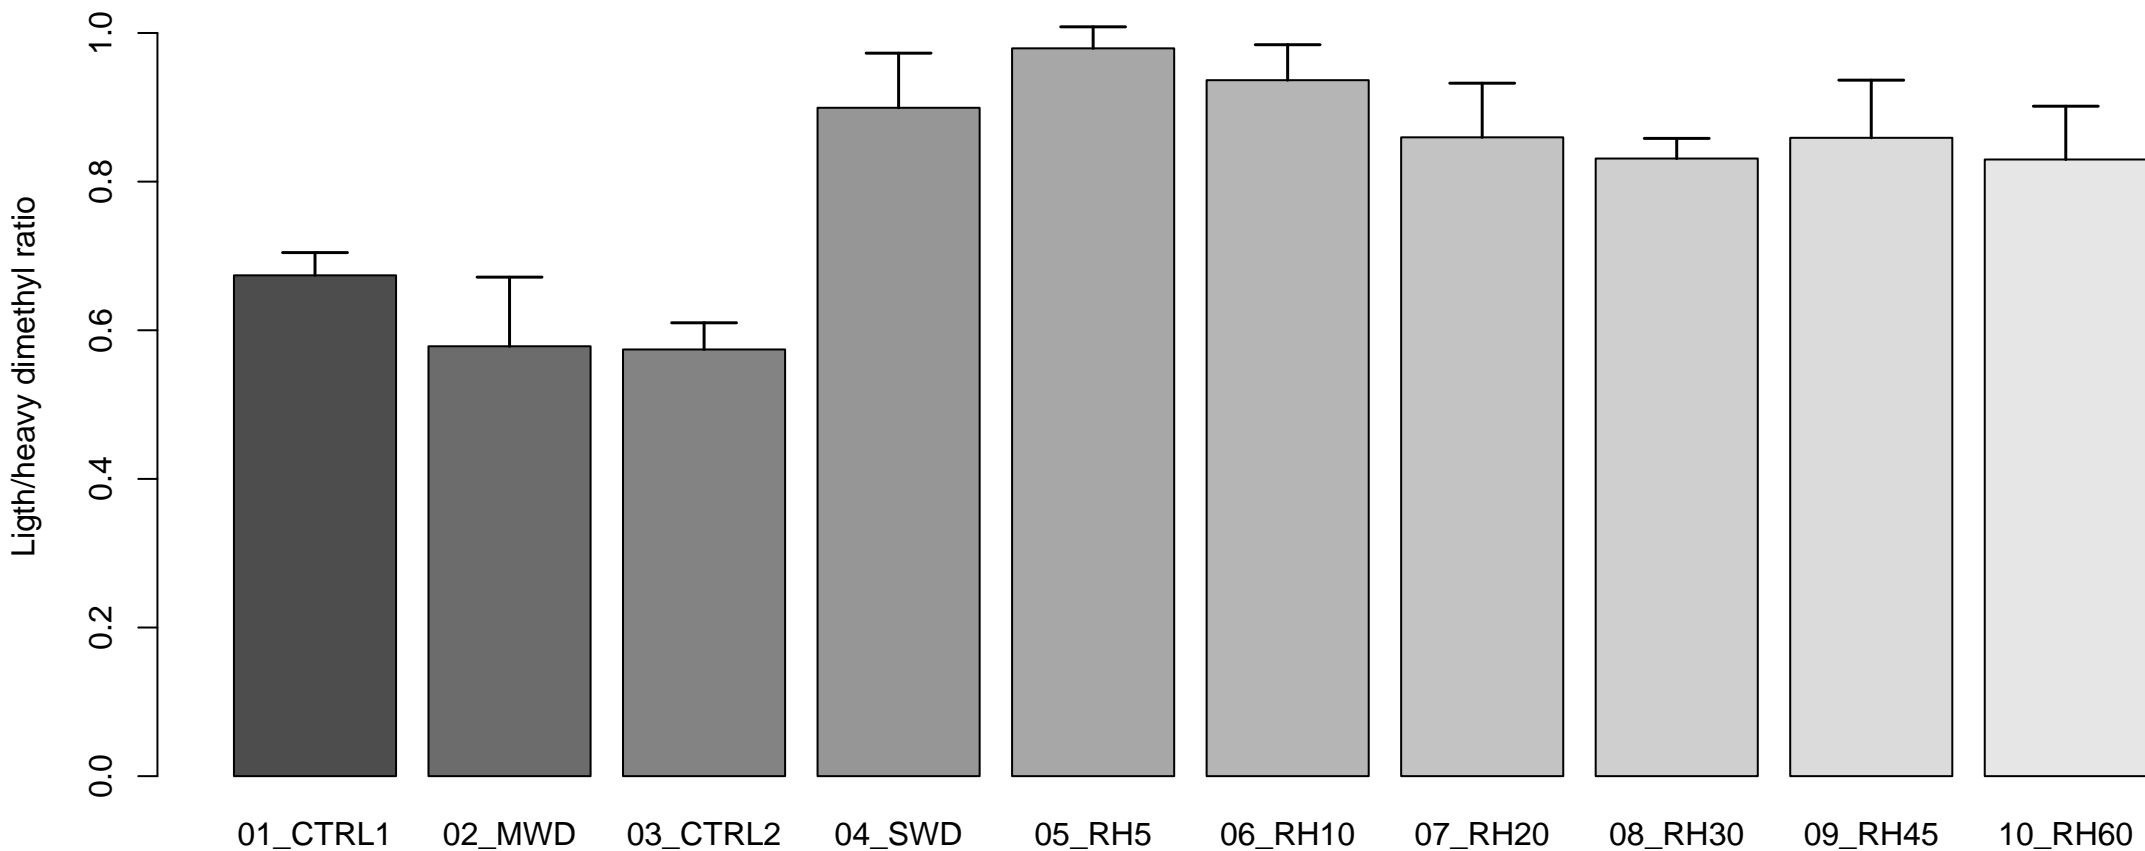

GRMZM2G012964\_P01

### Esterase # Y17

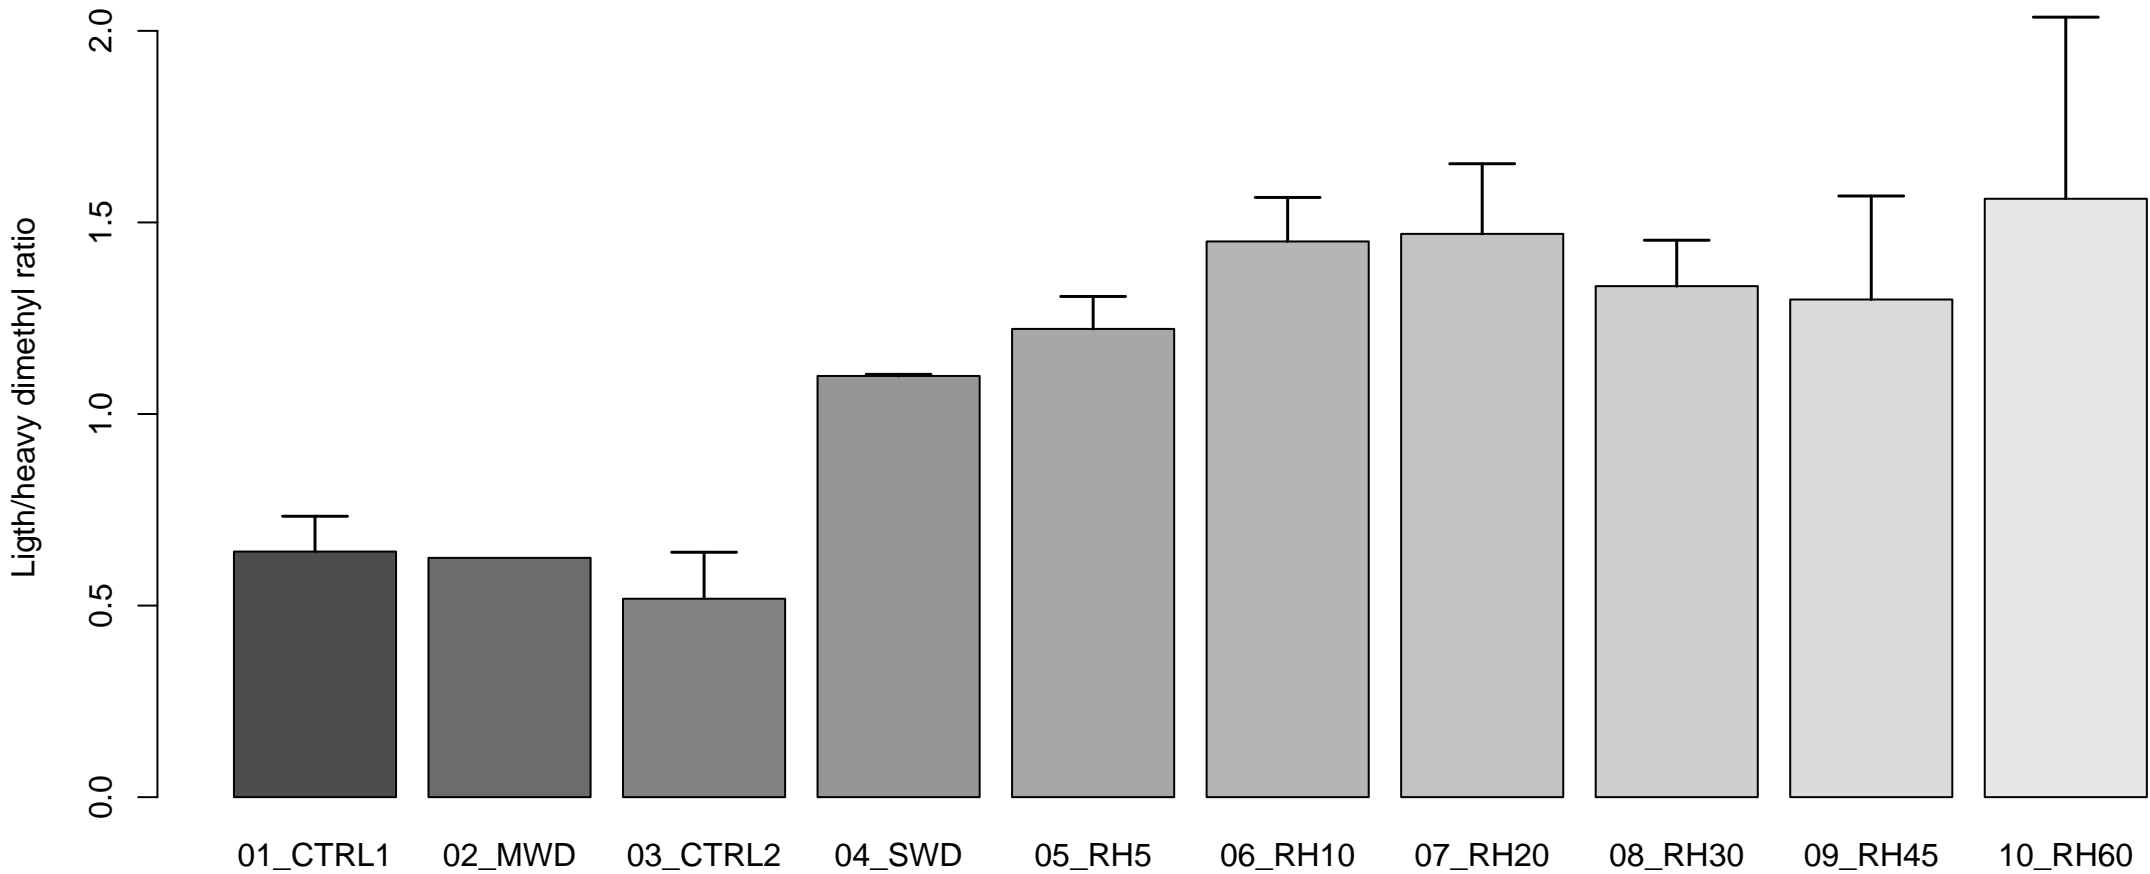

GRMZM2G166987\_P02

# AIR9 protein # S59

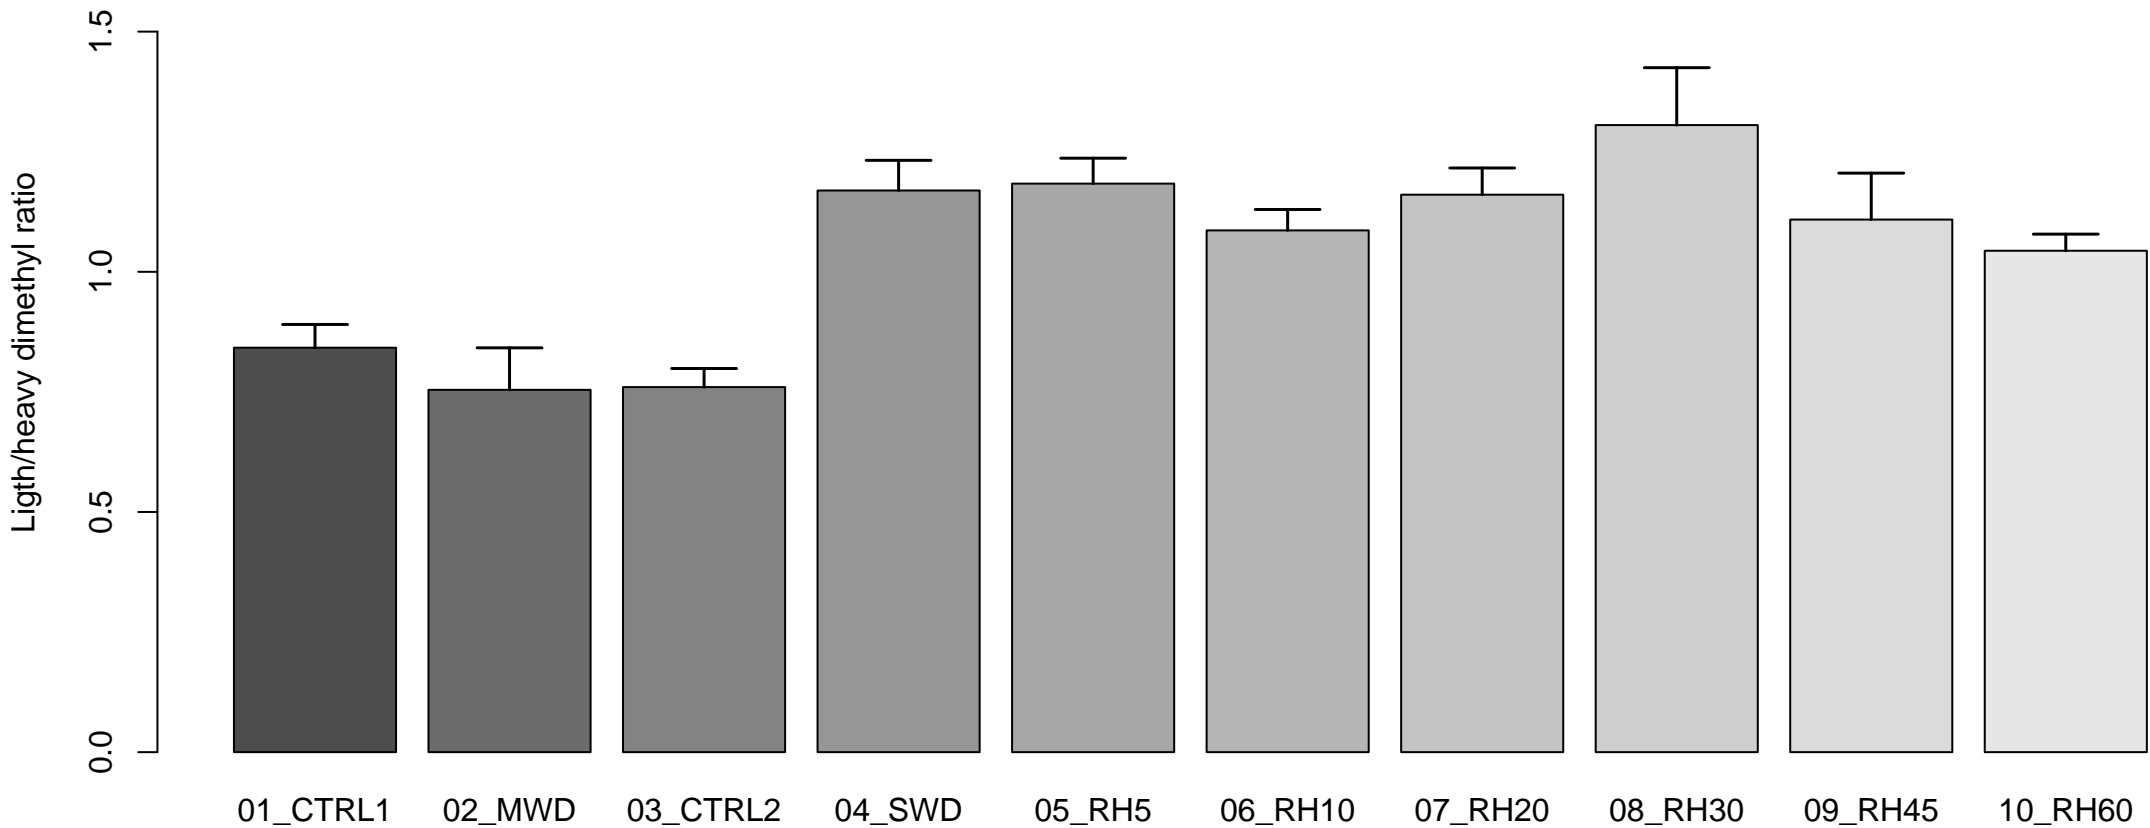

GRMZM2G012031\_P01

### Putative pumilio/Mpt5 family RNA-binding protein # S202

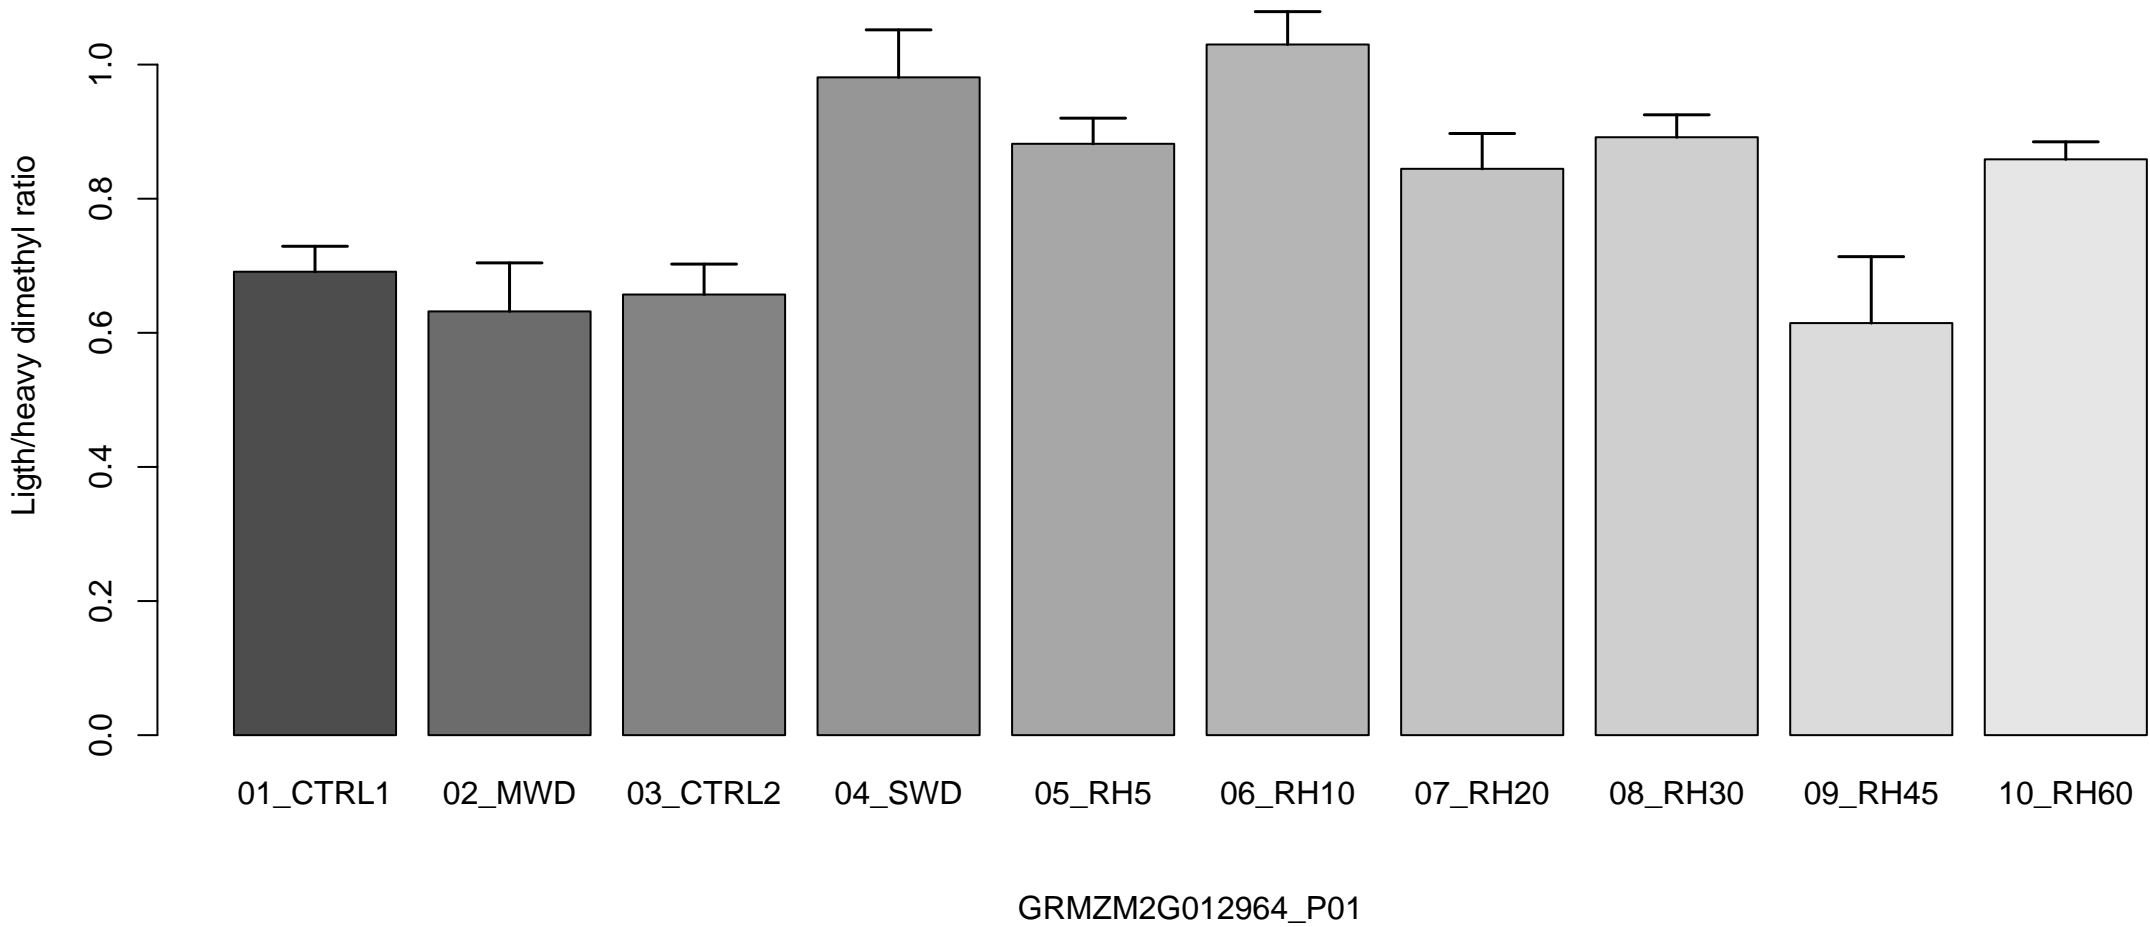

GRMZM2G012964\_P01



### Putative pumilio/Mpt5 family RNA-binding protein # S31/T35

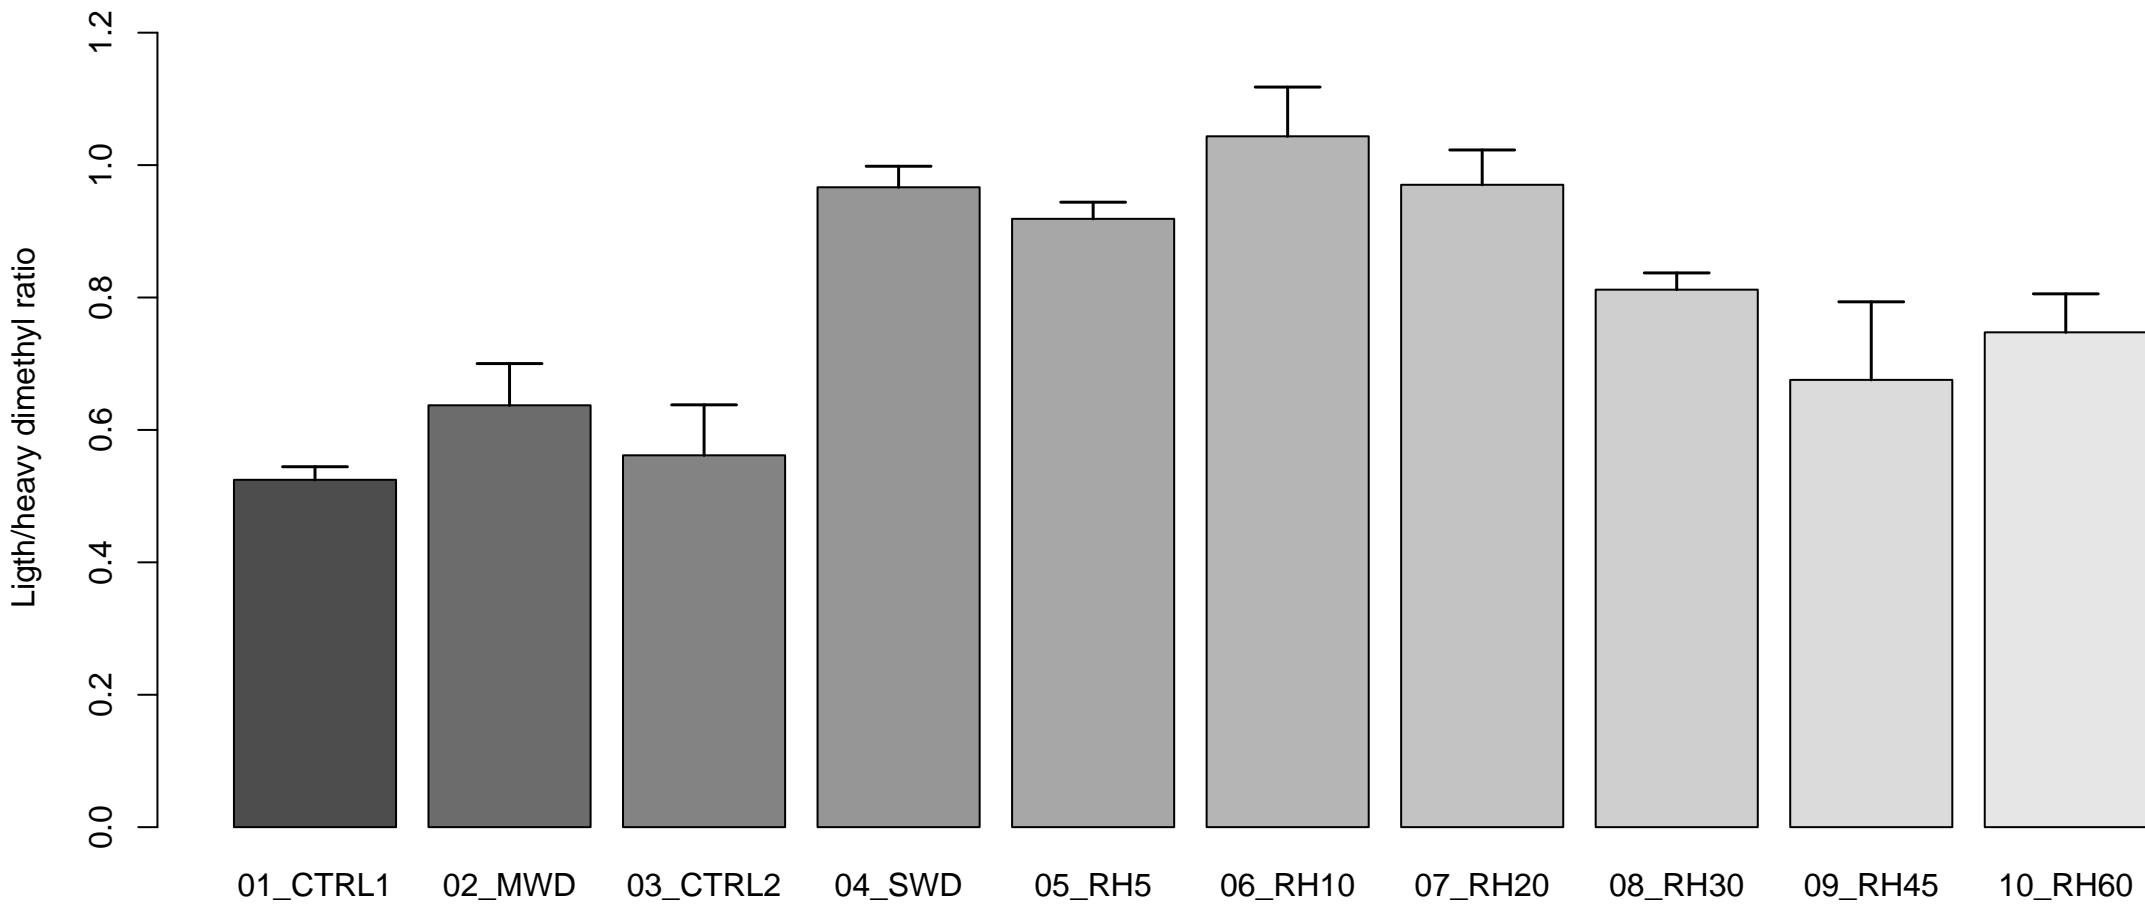

GRMZM2G012964\_P01

### Putative uncharacterized protein # S177

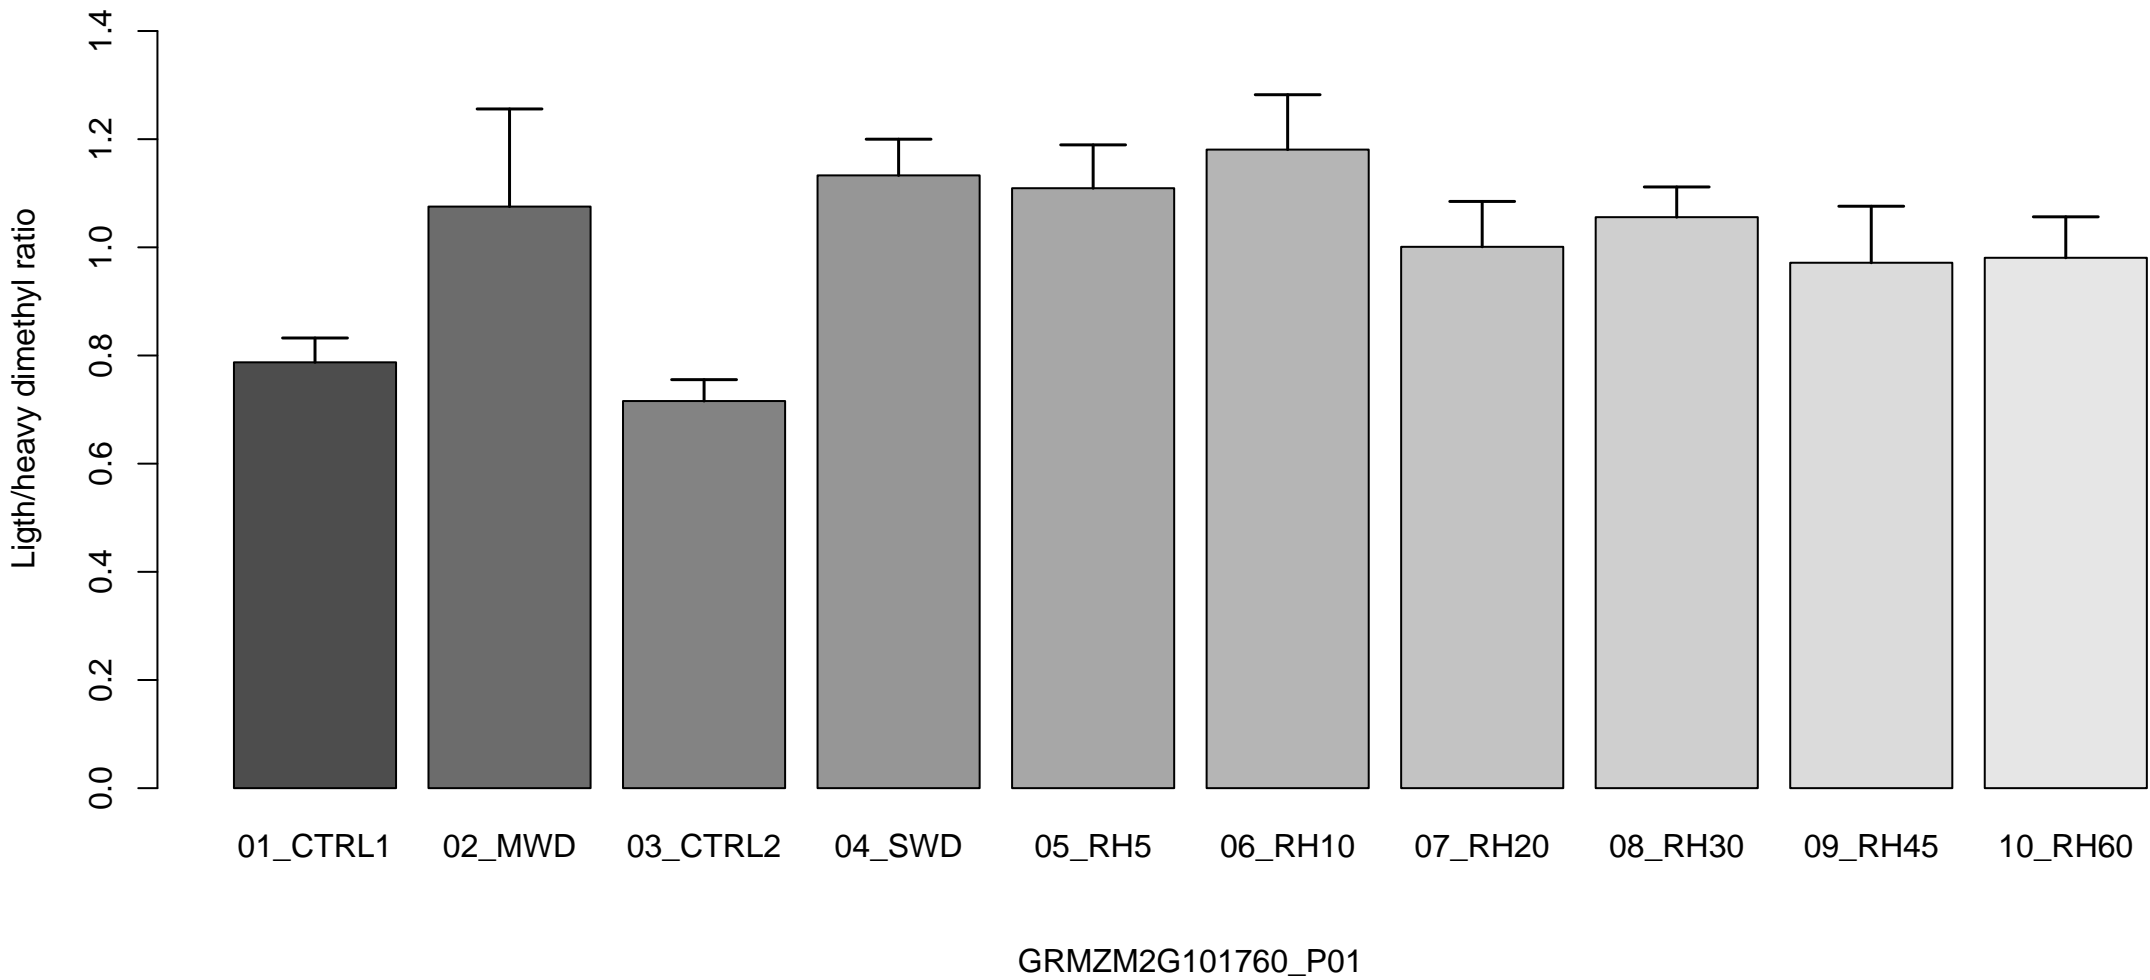

### Putative uncharacterized protein # S166

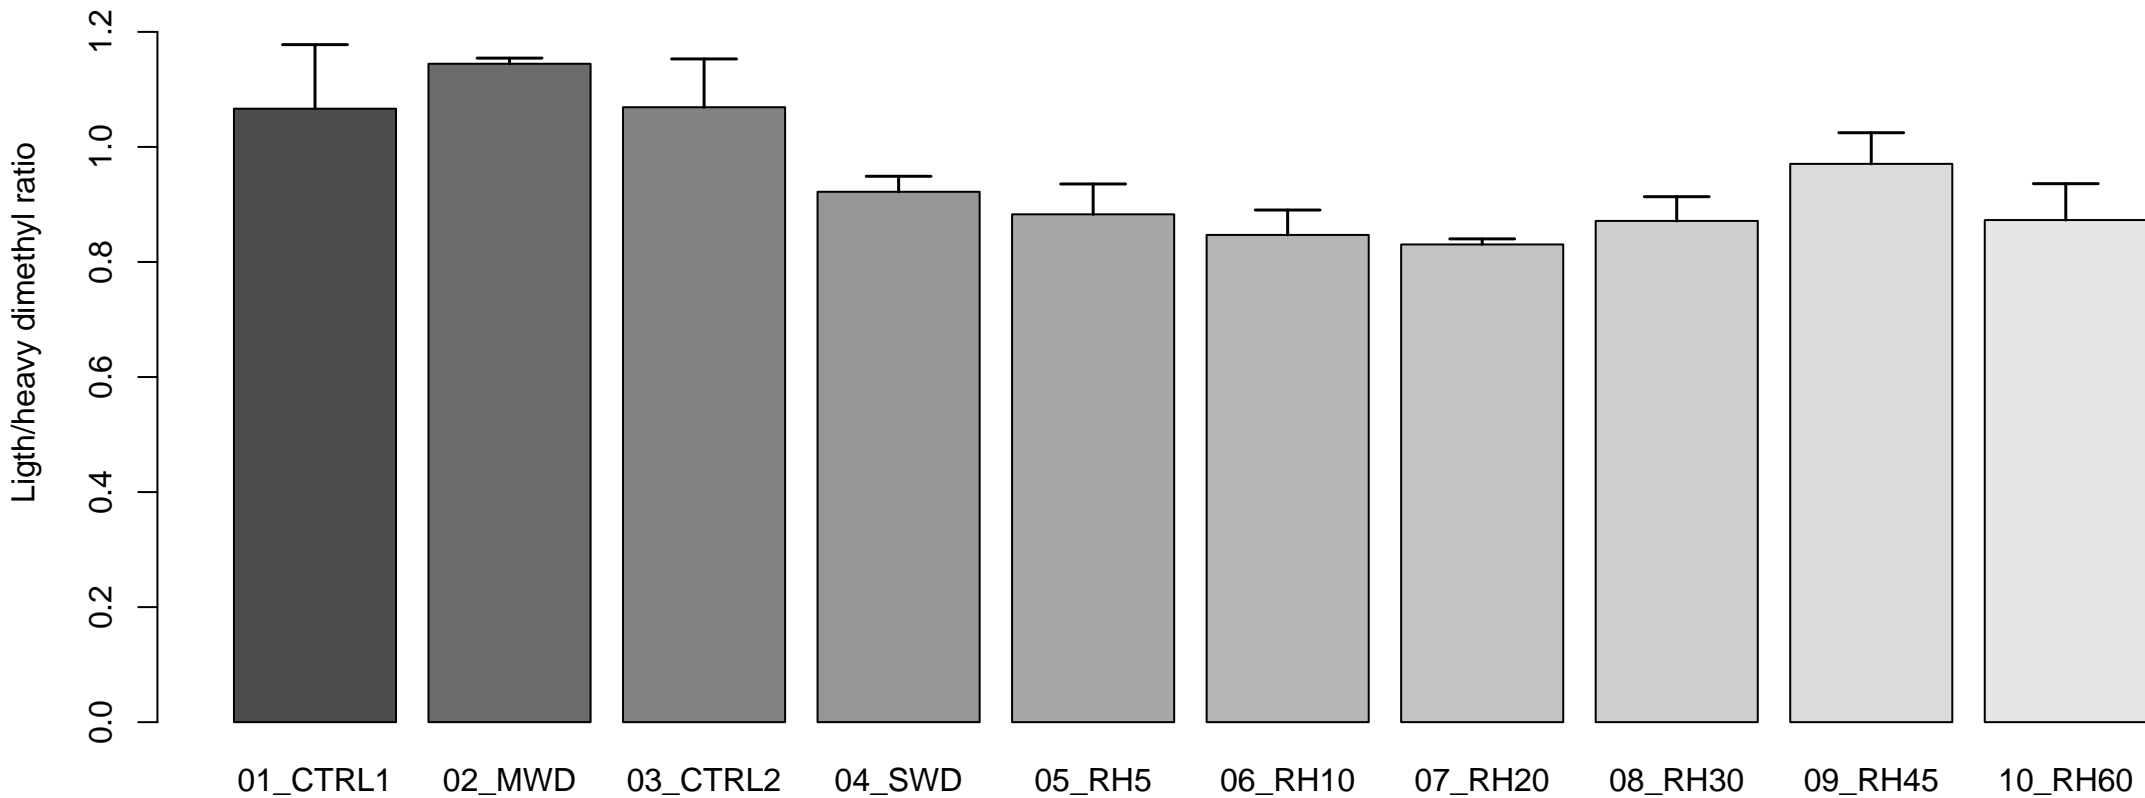

GRMZM2G101760\_P01

### Putative uncharacterized protein # S163, T188

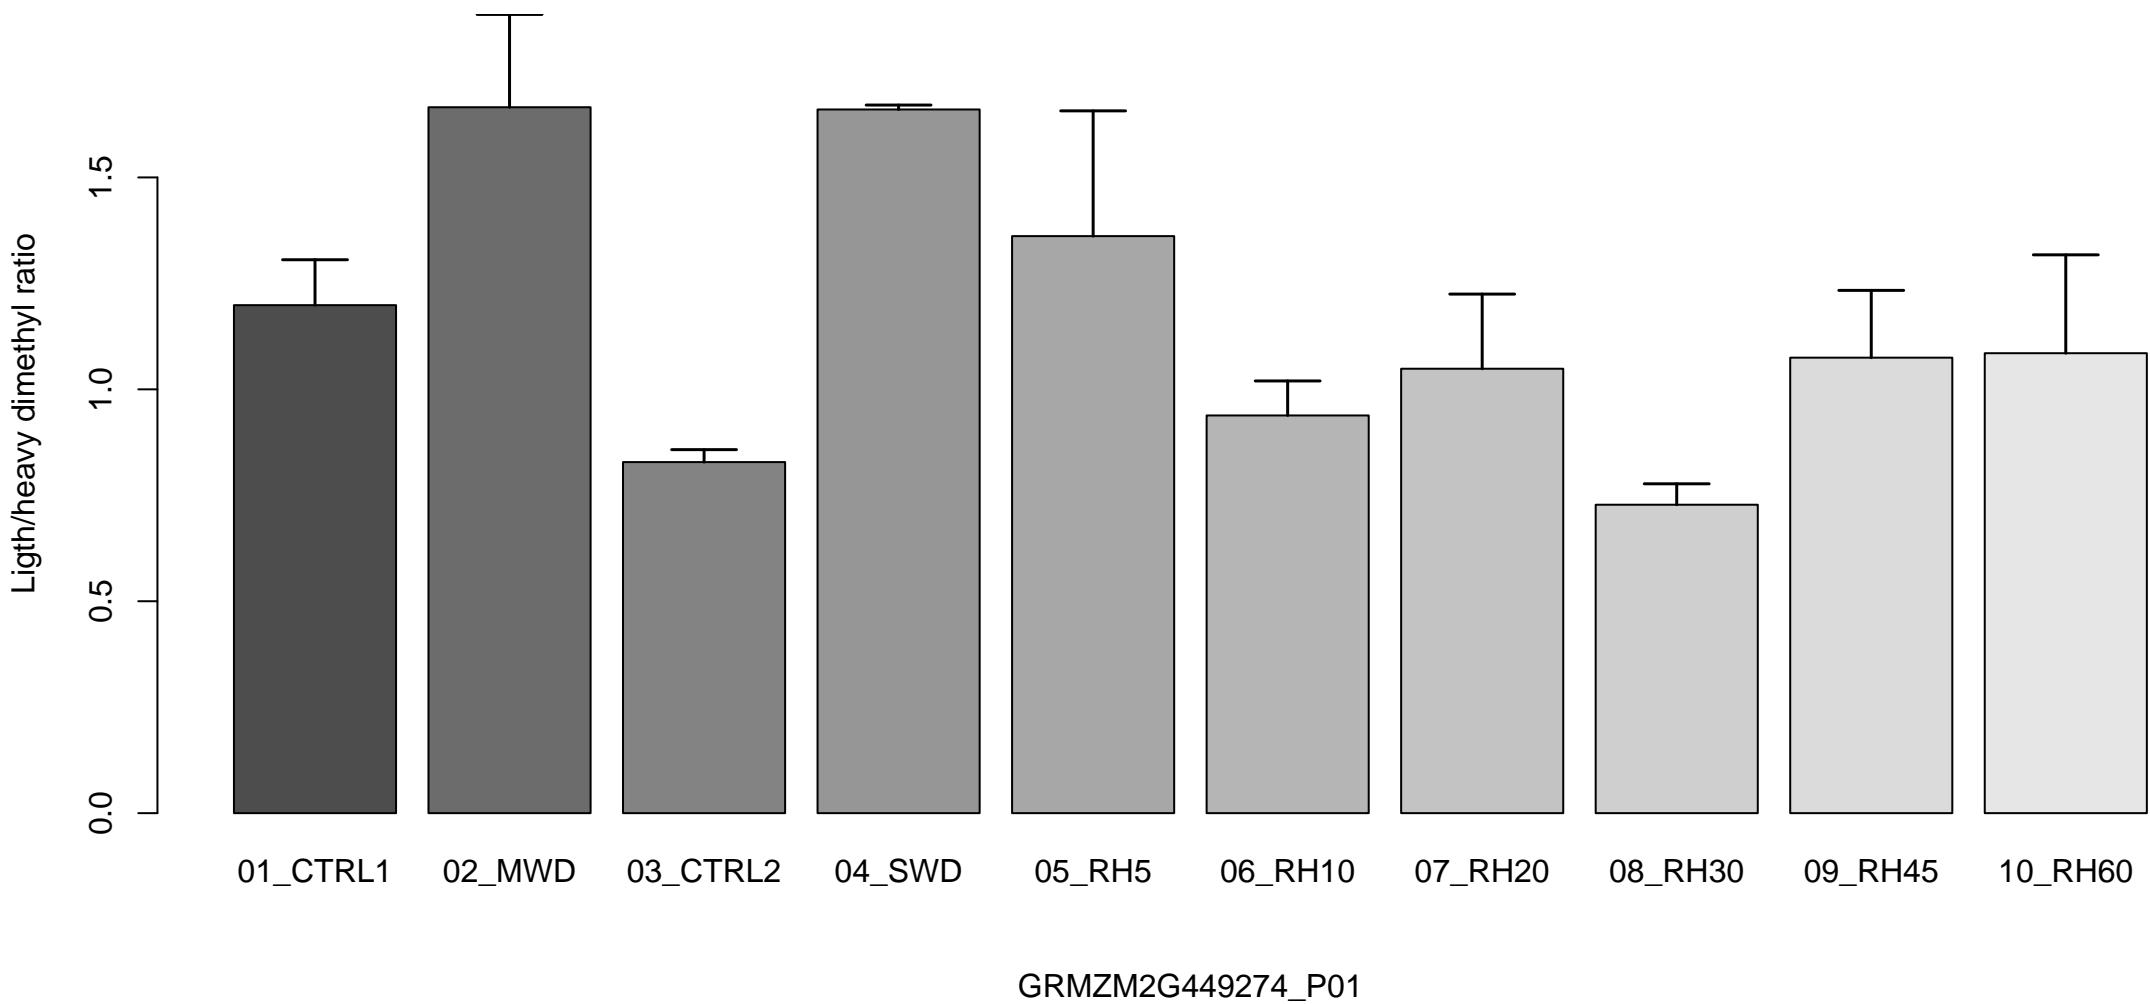

### Putative Ste-20 related kinase, 3'-partial # S351

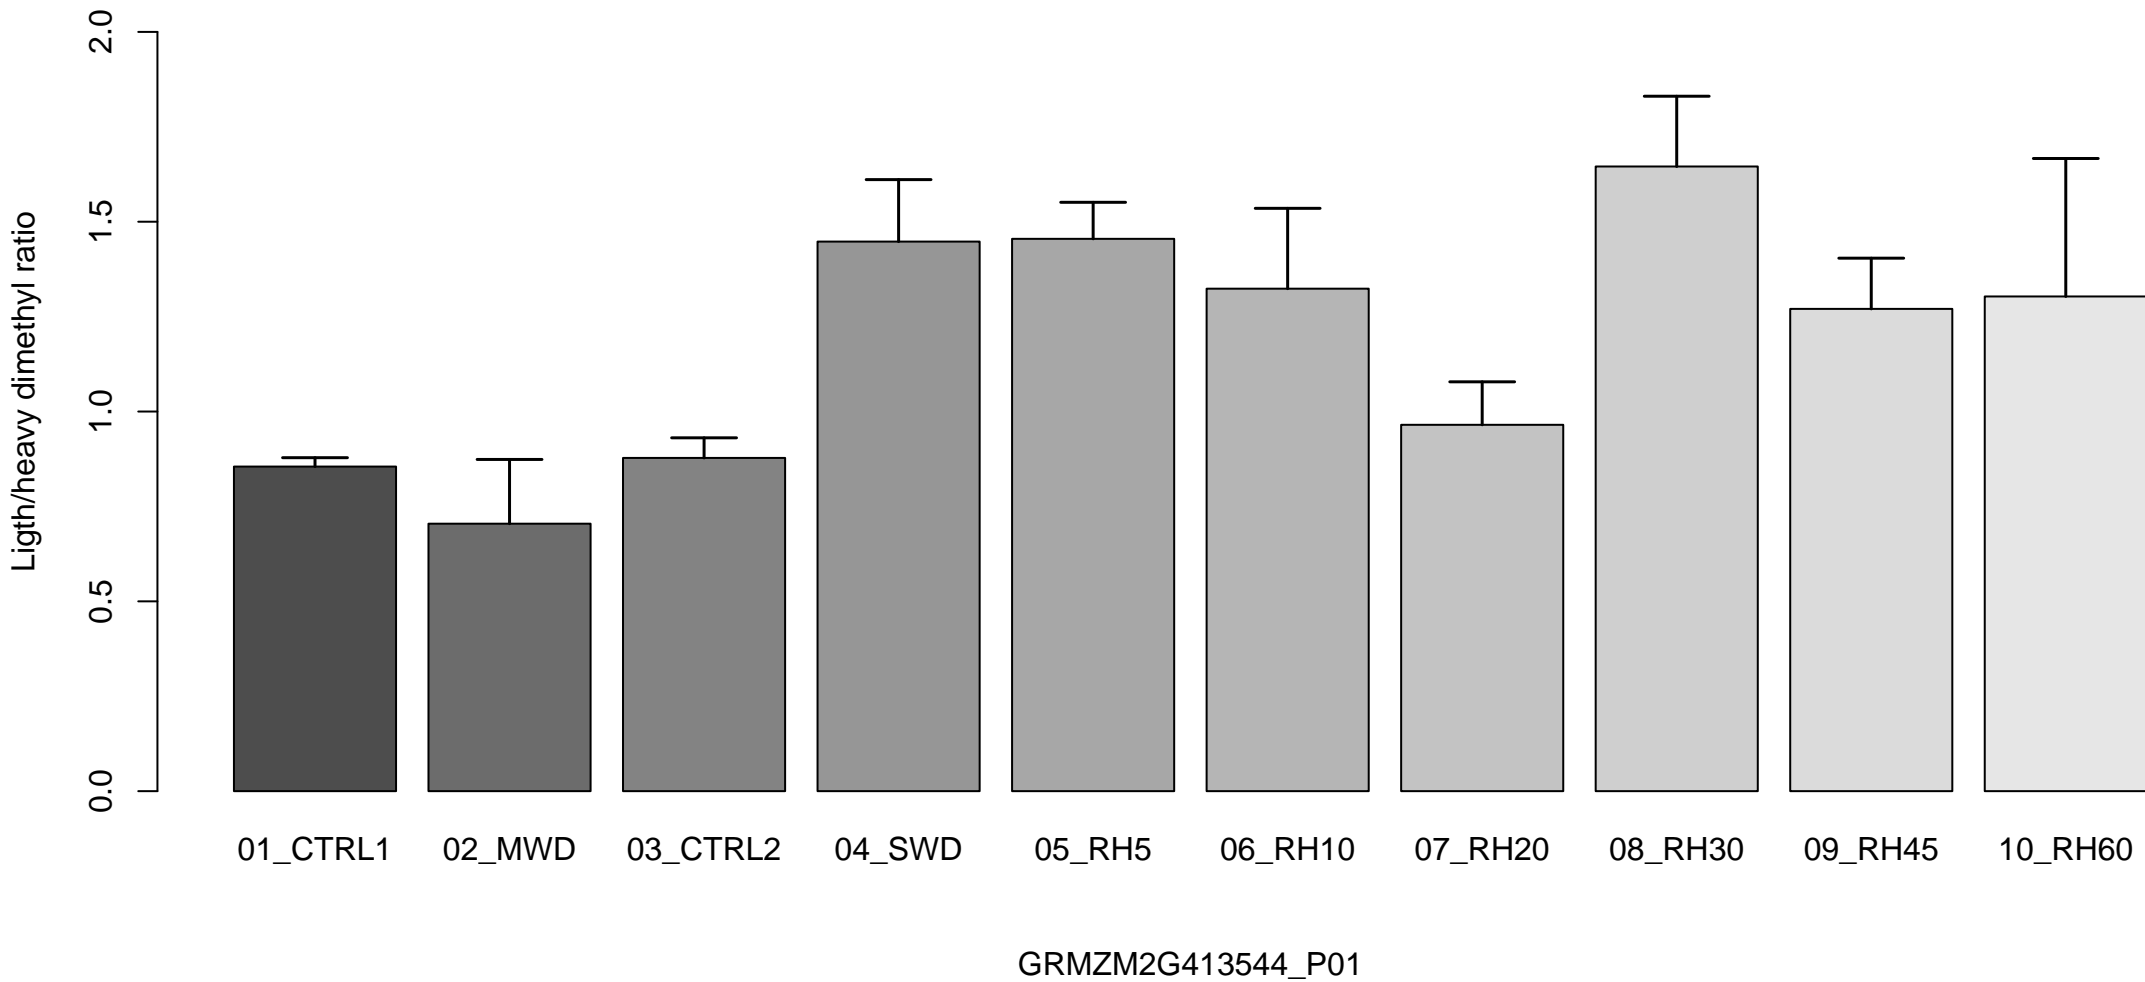

### ATPase, AAA family protein, expressed # T707

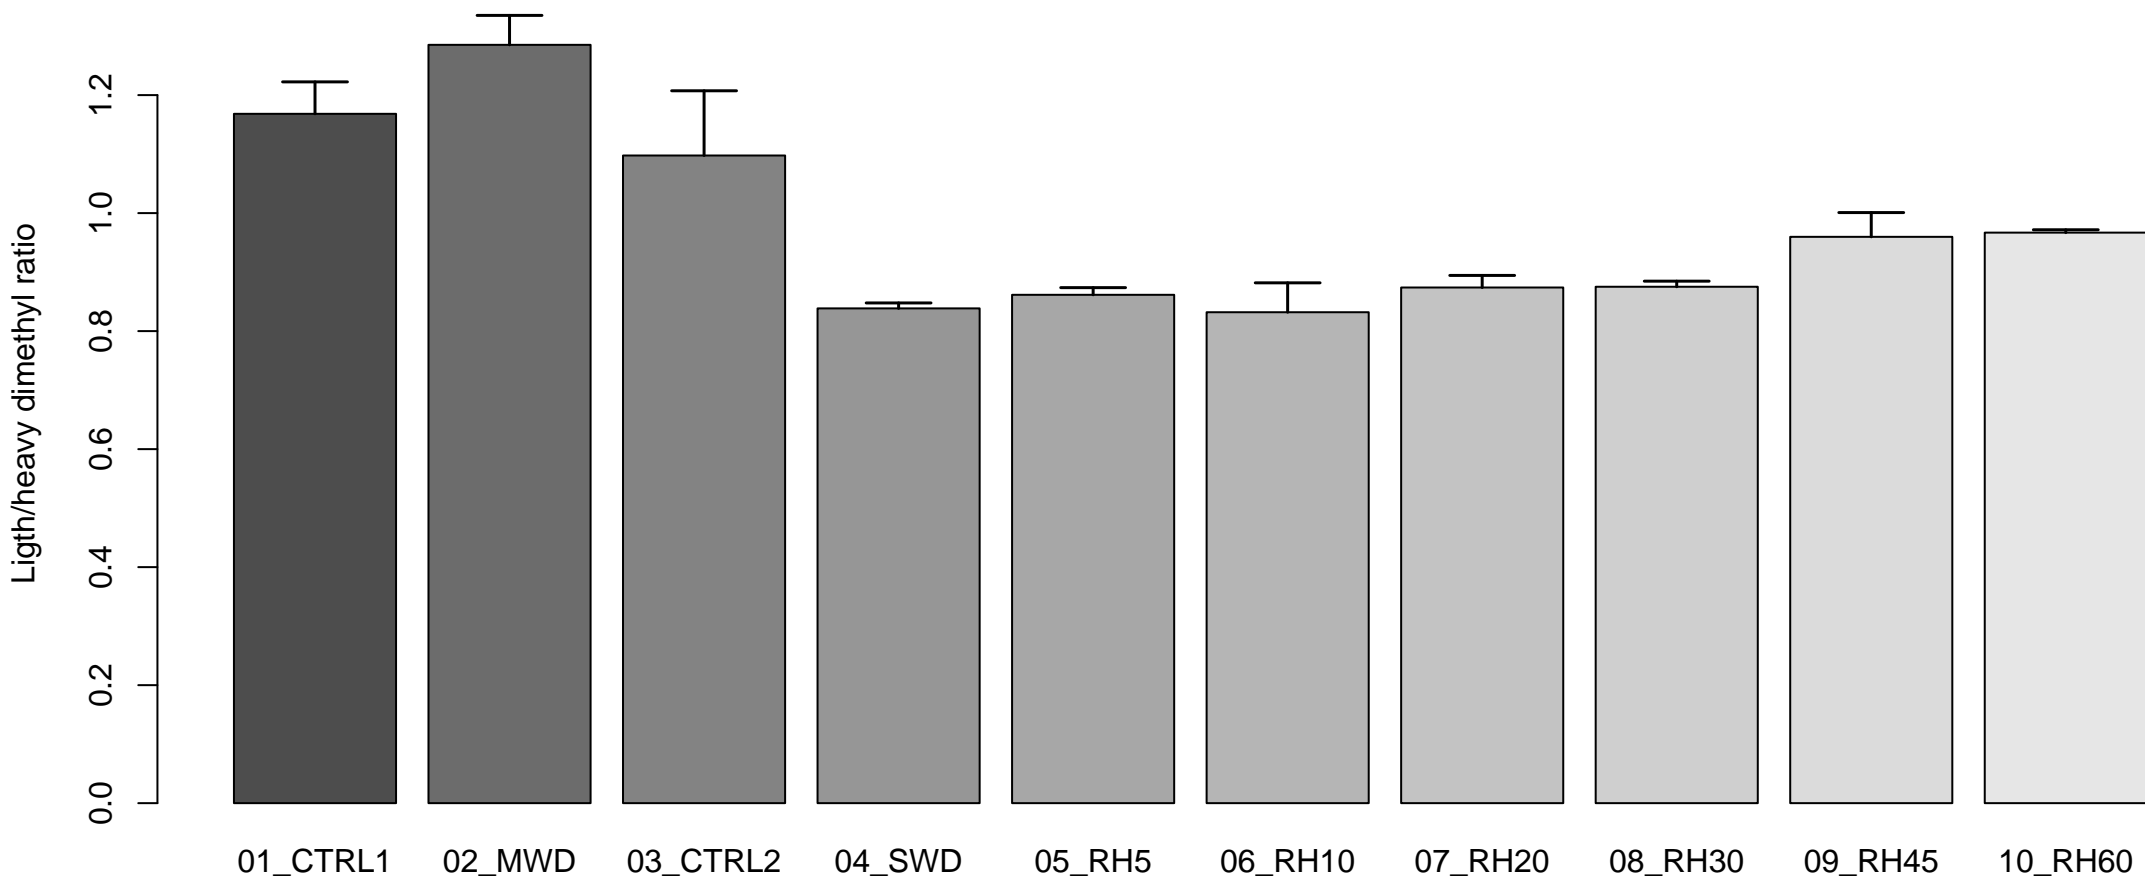

GRMZM2G117028\_P01

# Cellulose synthase-2 # S158/S165

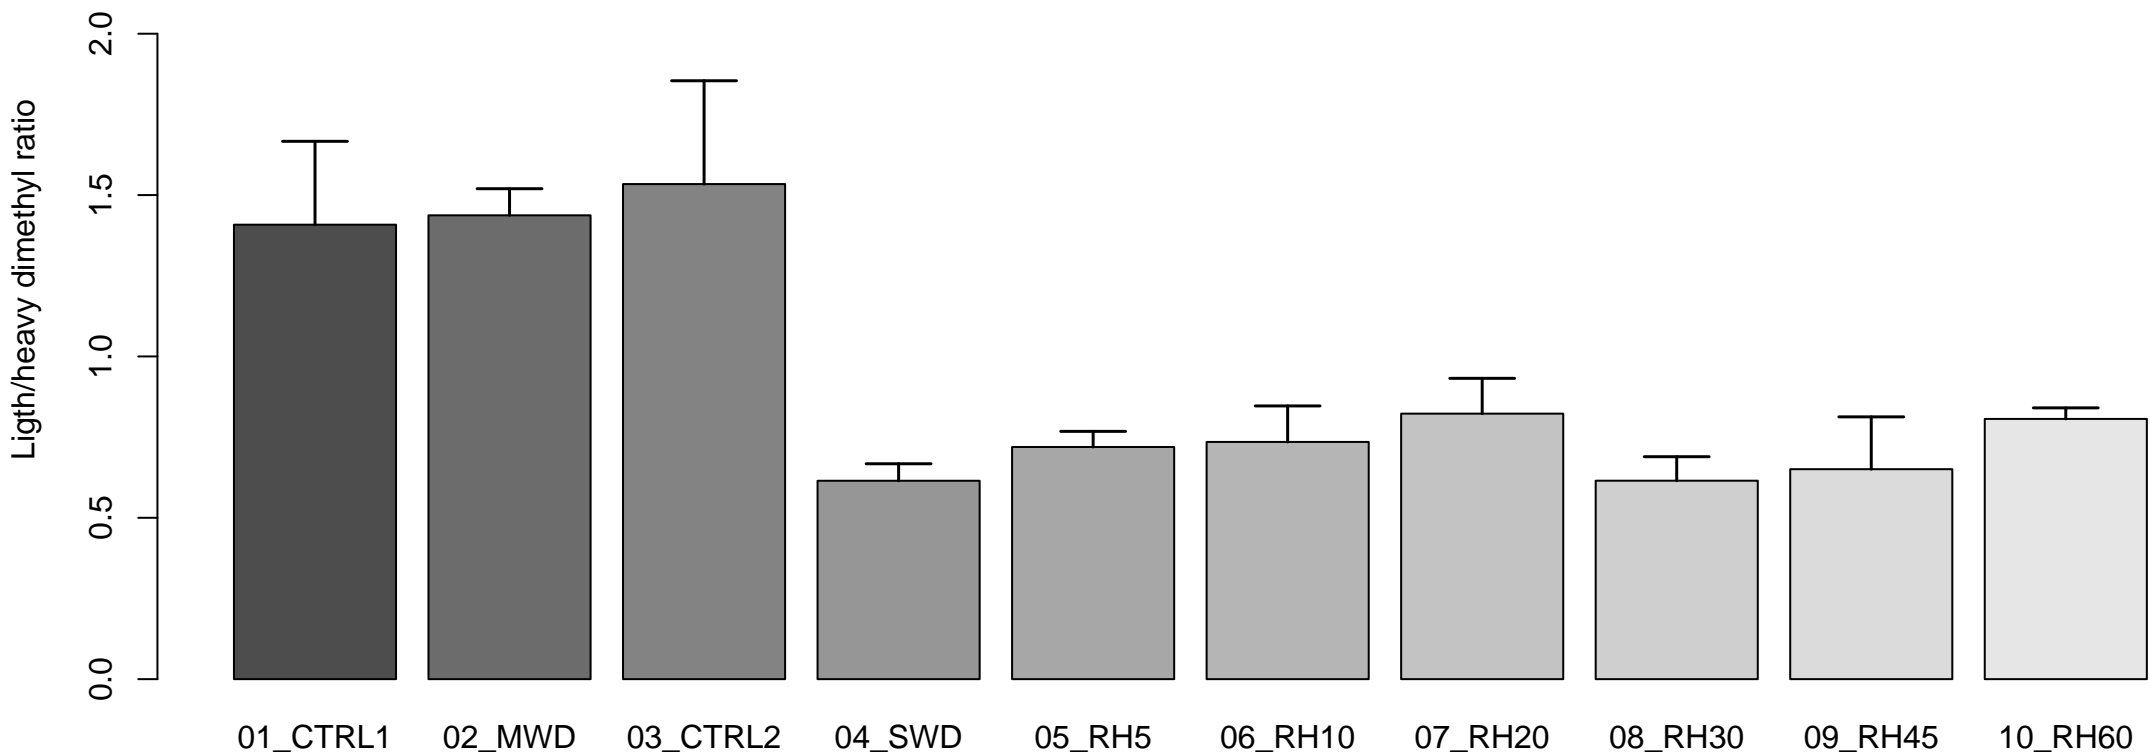

GRMZM2G027723\_P01

## HemK methyltransferase family member 2 # S255

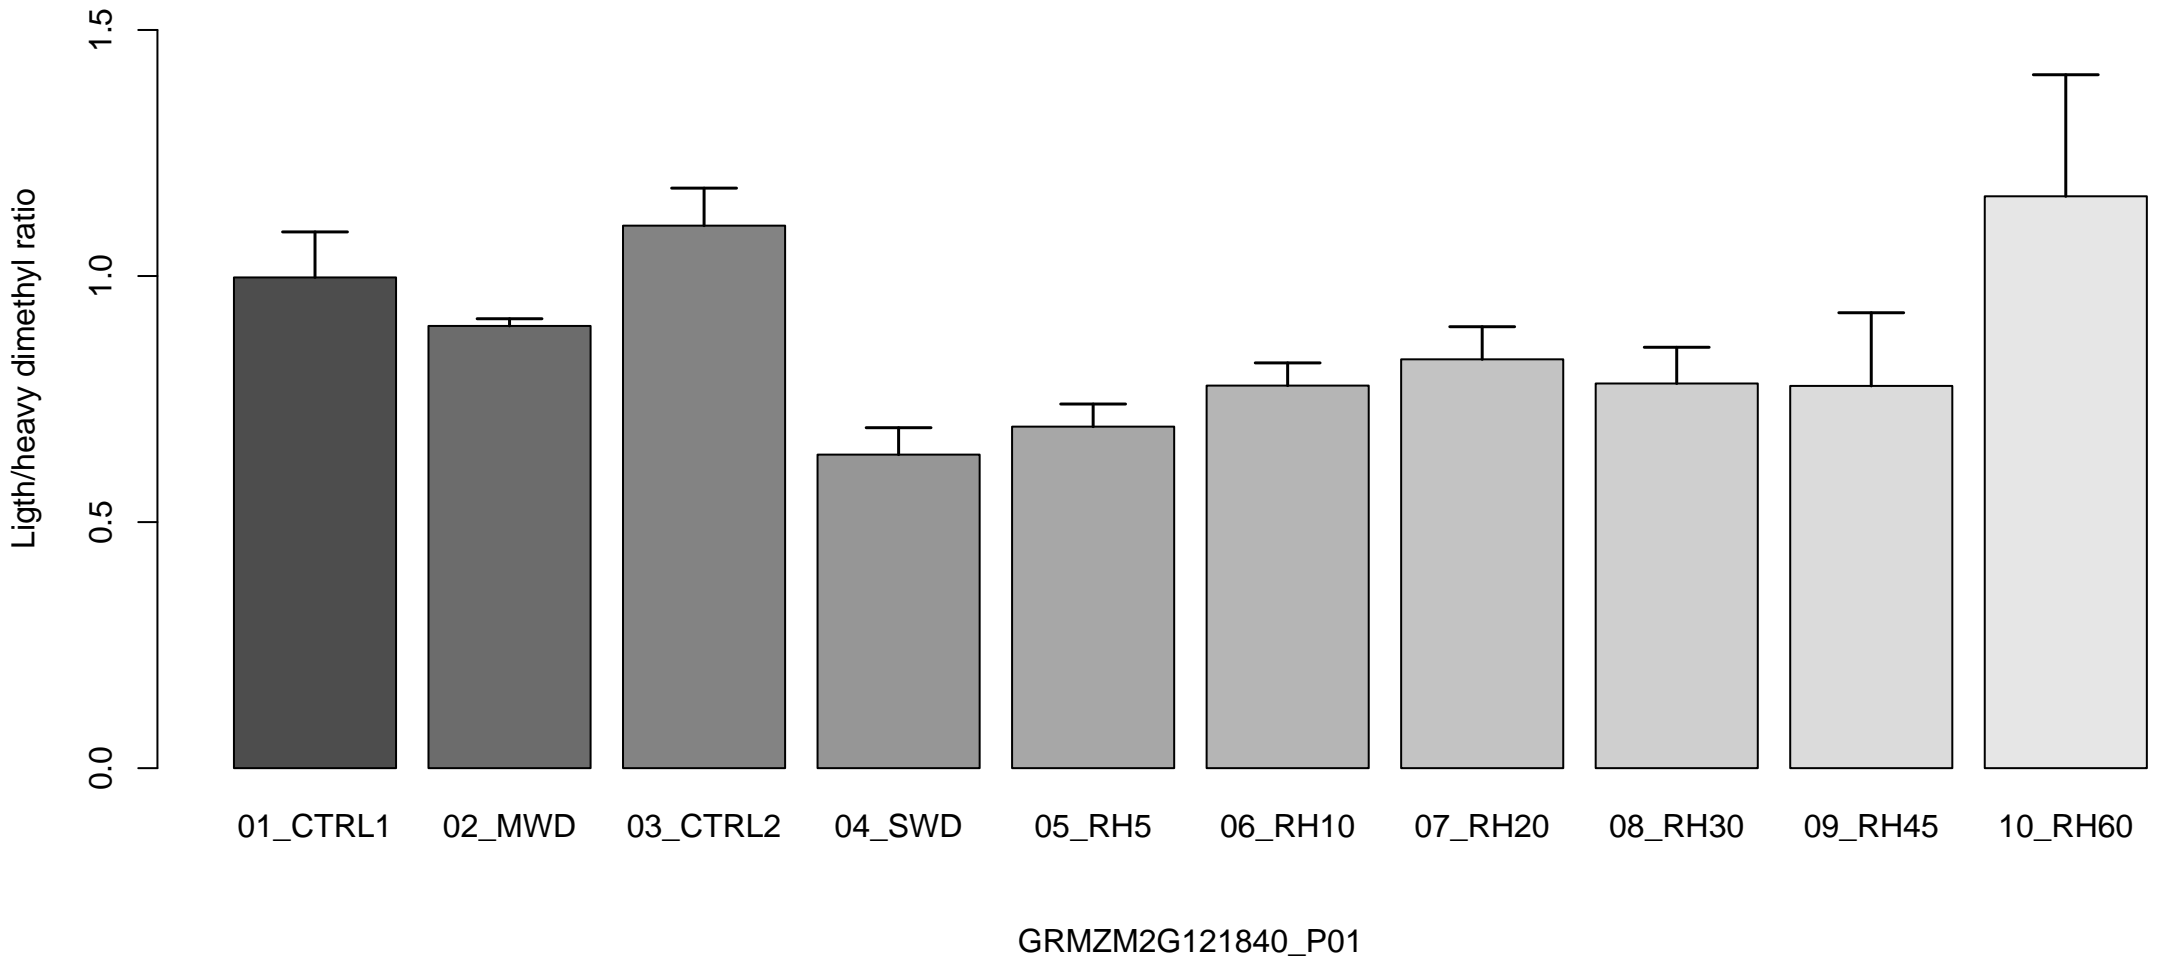



### DNL zinc finger family protein # T12, S21

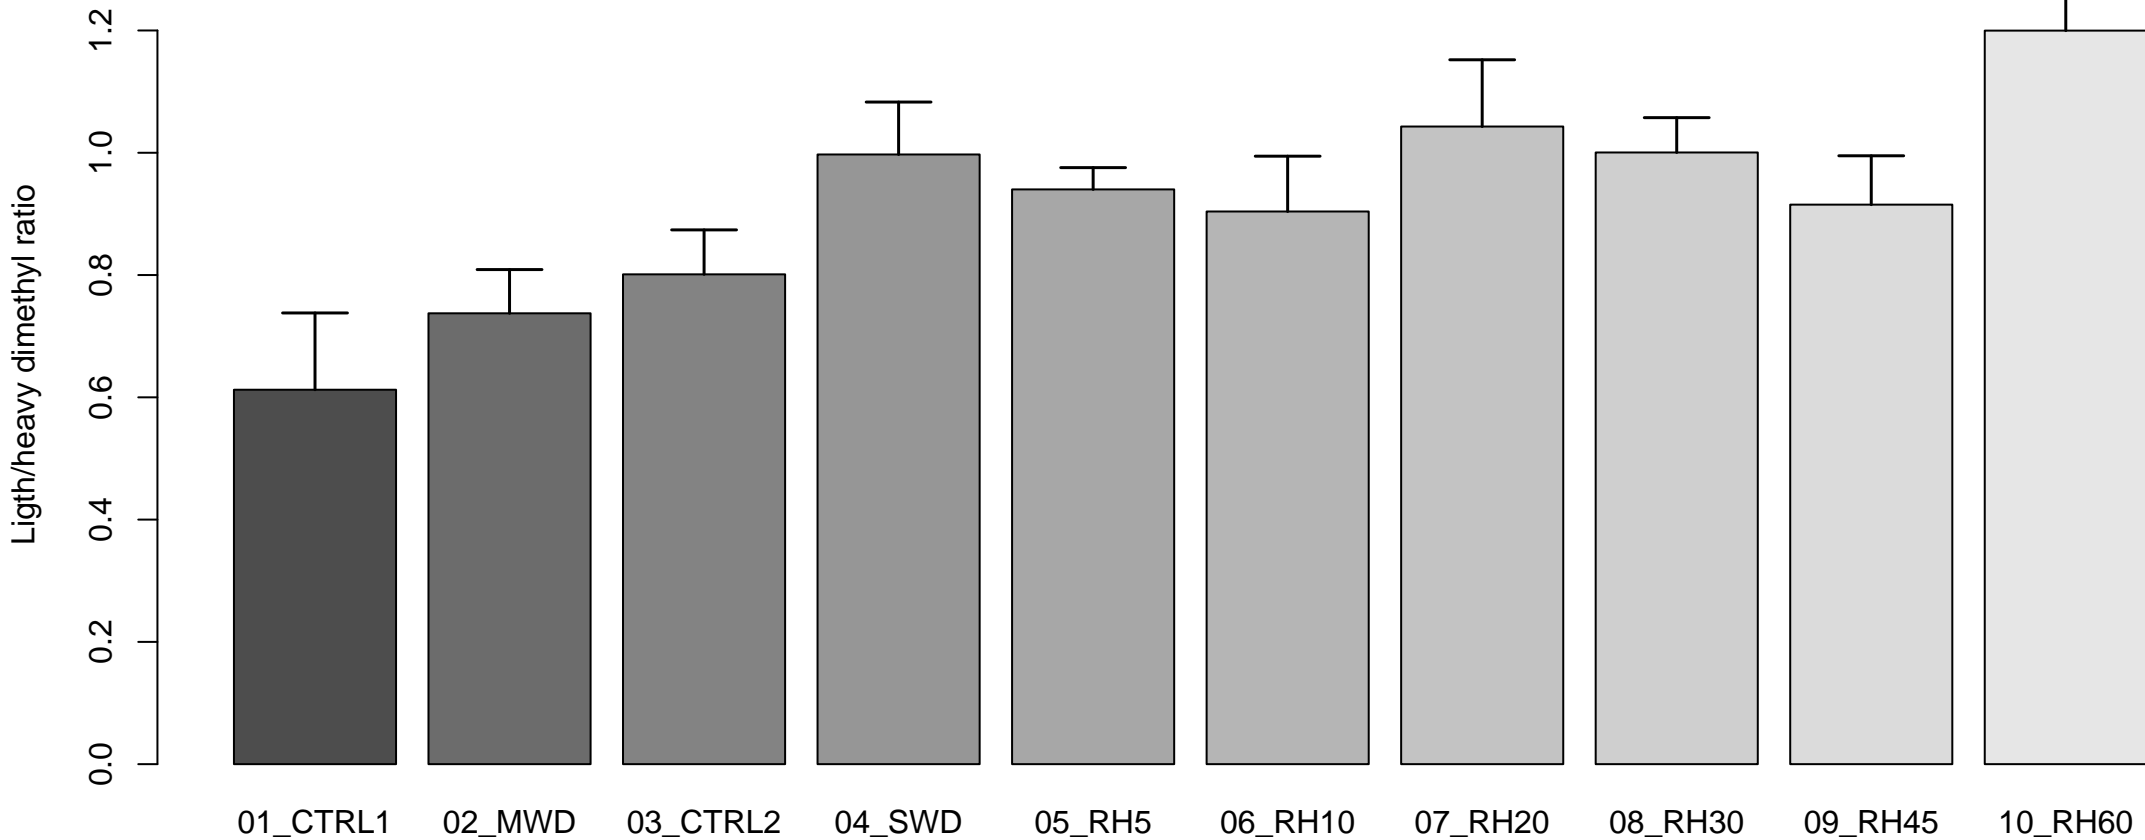

GRMZM2G132636\_P01

### Putative uncharacterized protein # S19/T21/T23

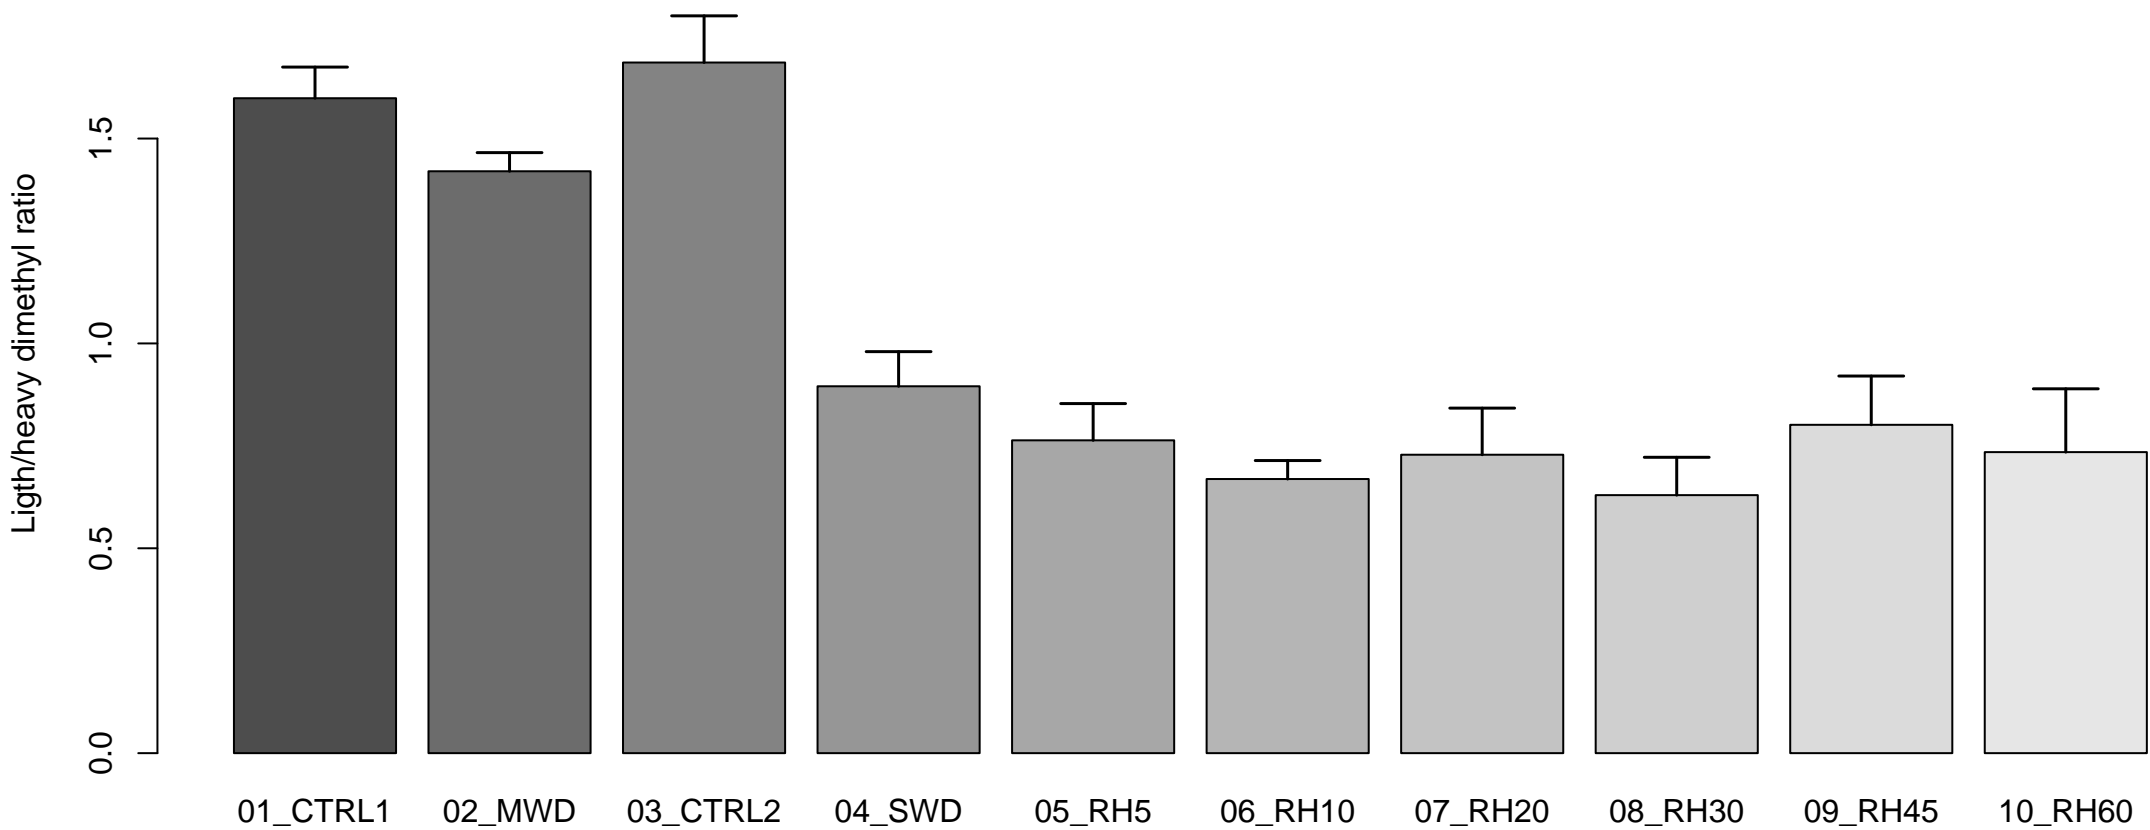

GRMZM2G152768\_P01

### Serine/threonine-protein kinase SAPK10 # S173

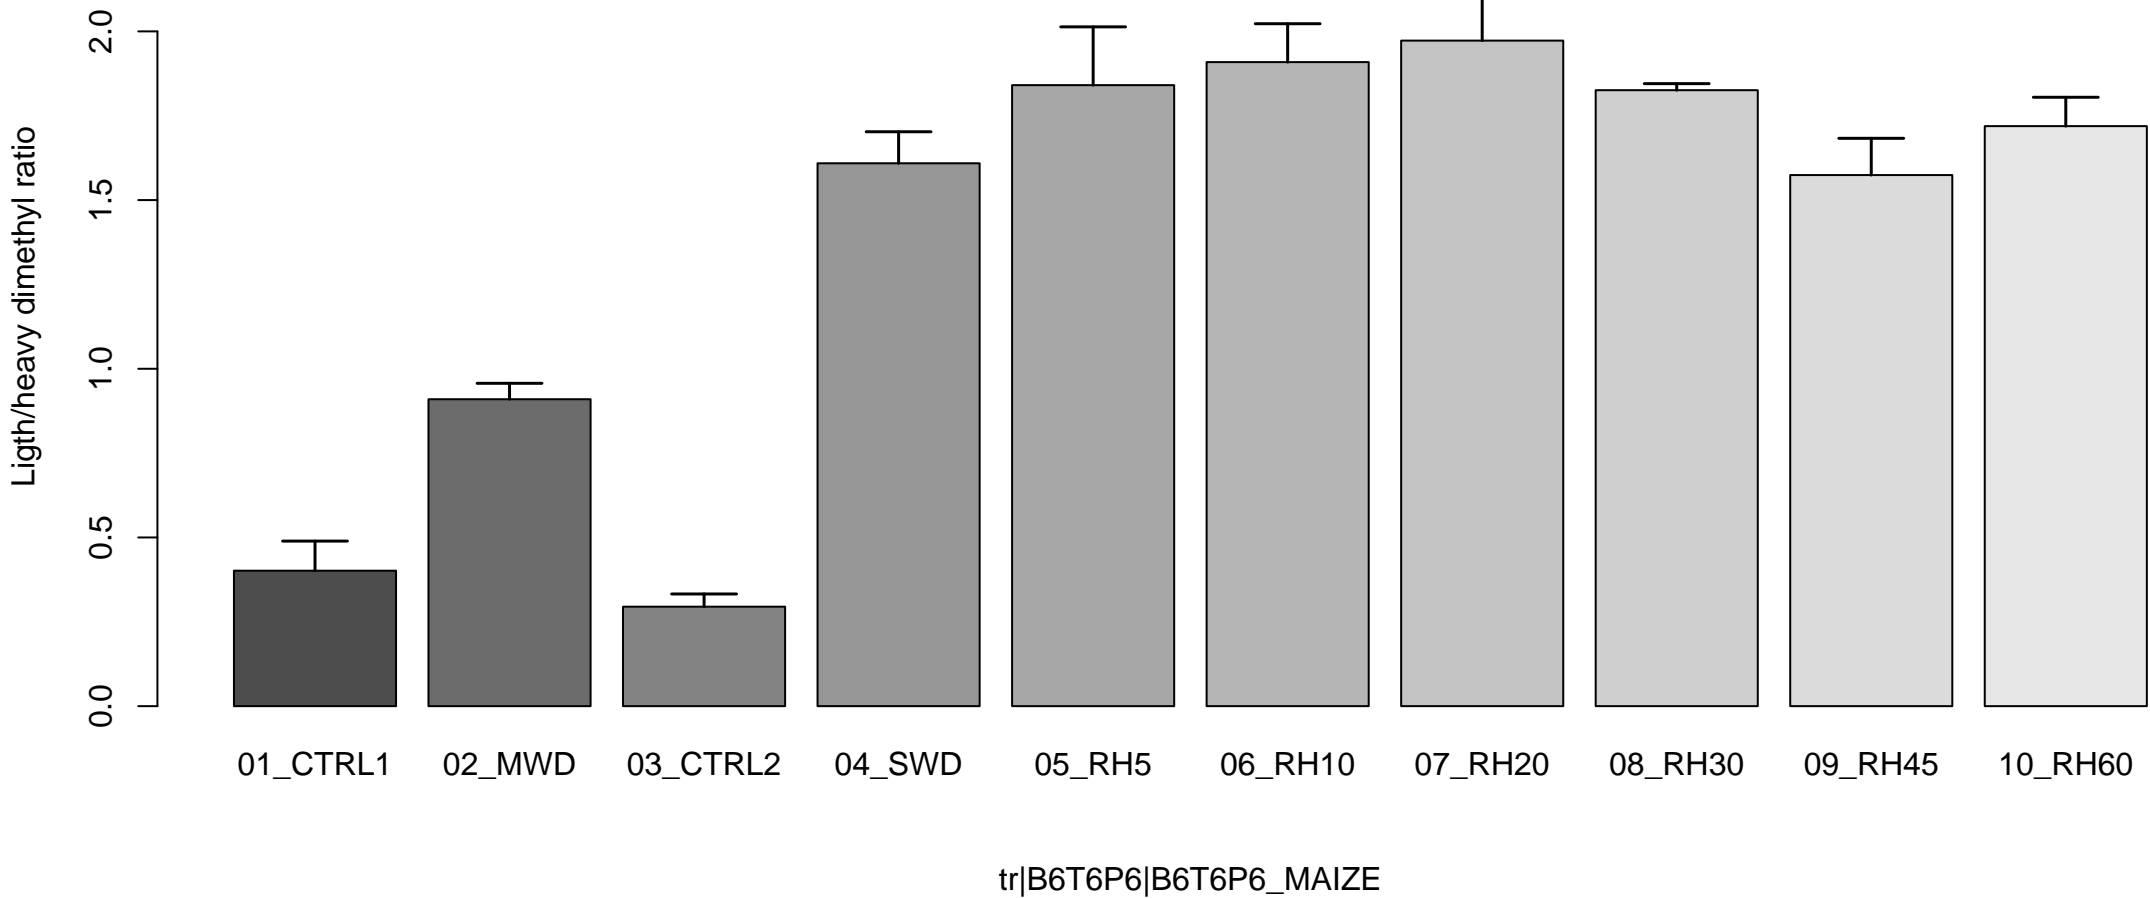

# Naringenin,2-oxoglutarate 3-dioxygenase # S17

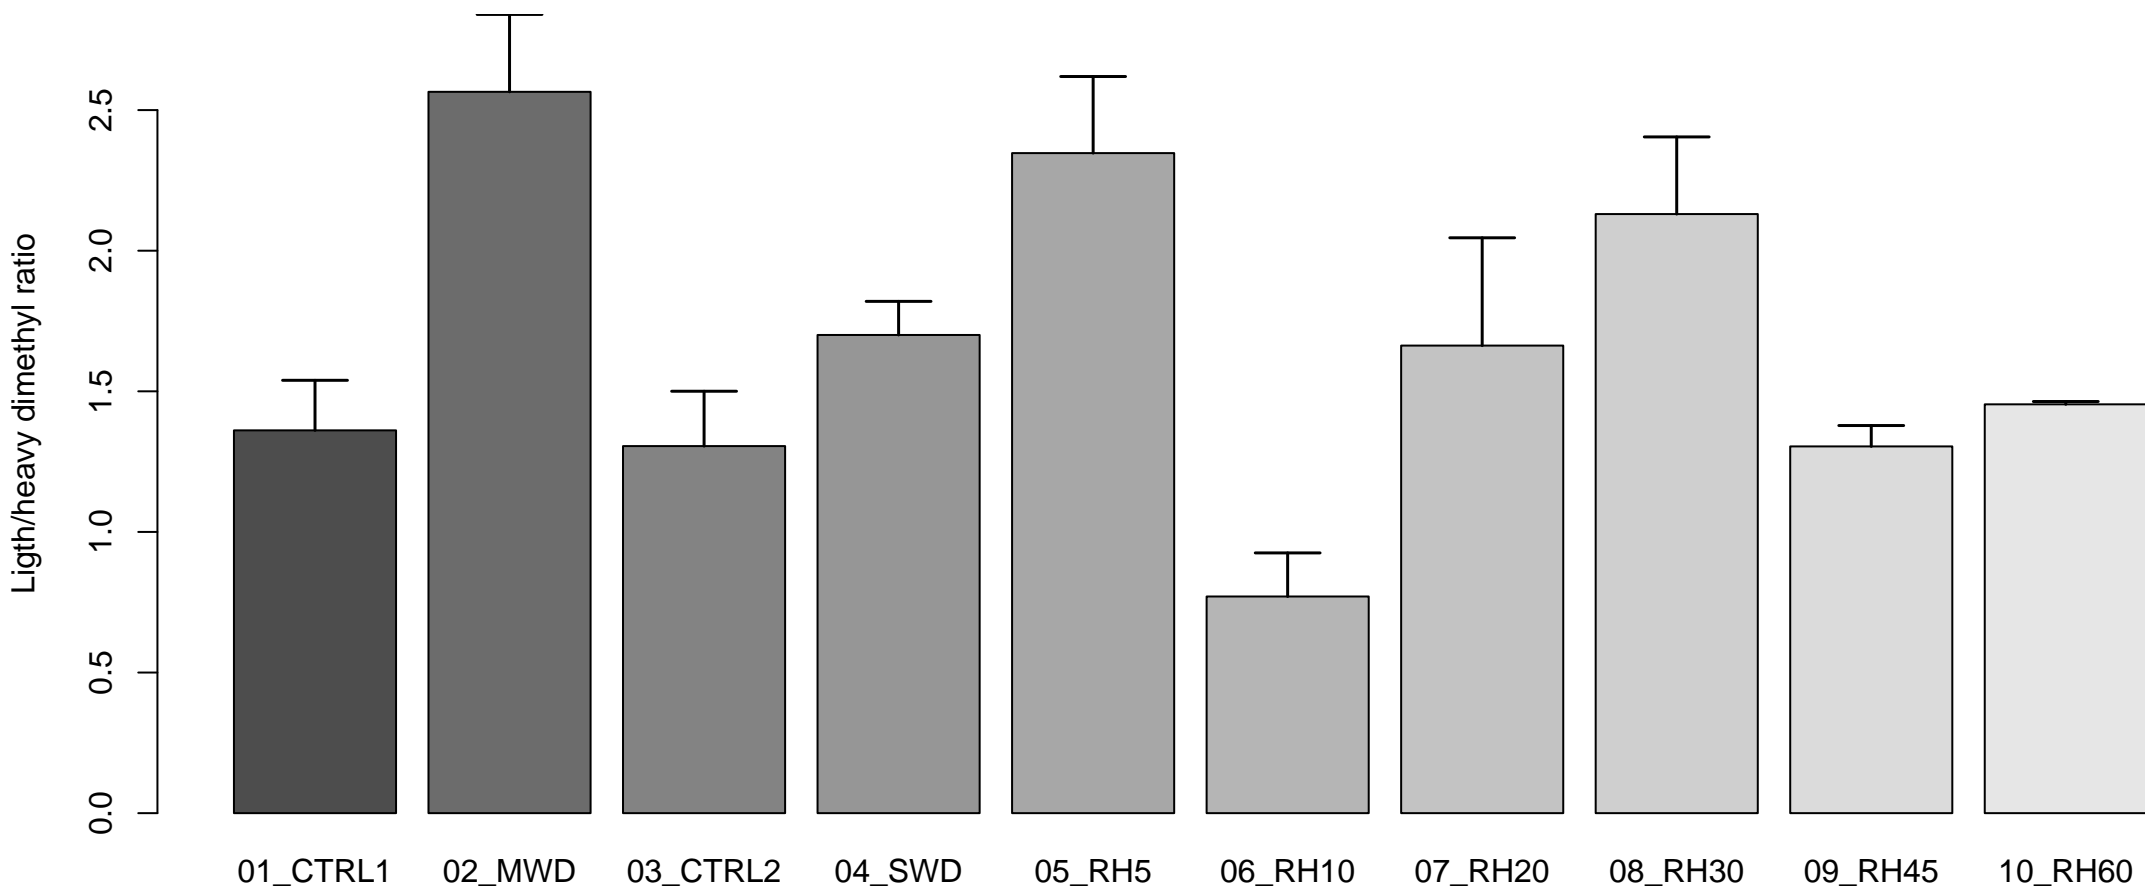

GRMZM2G702514\_P01

### Putative uncharacterized protein Sb06g021700 # S717

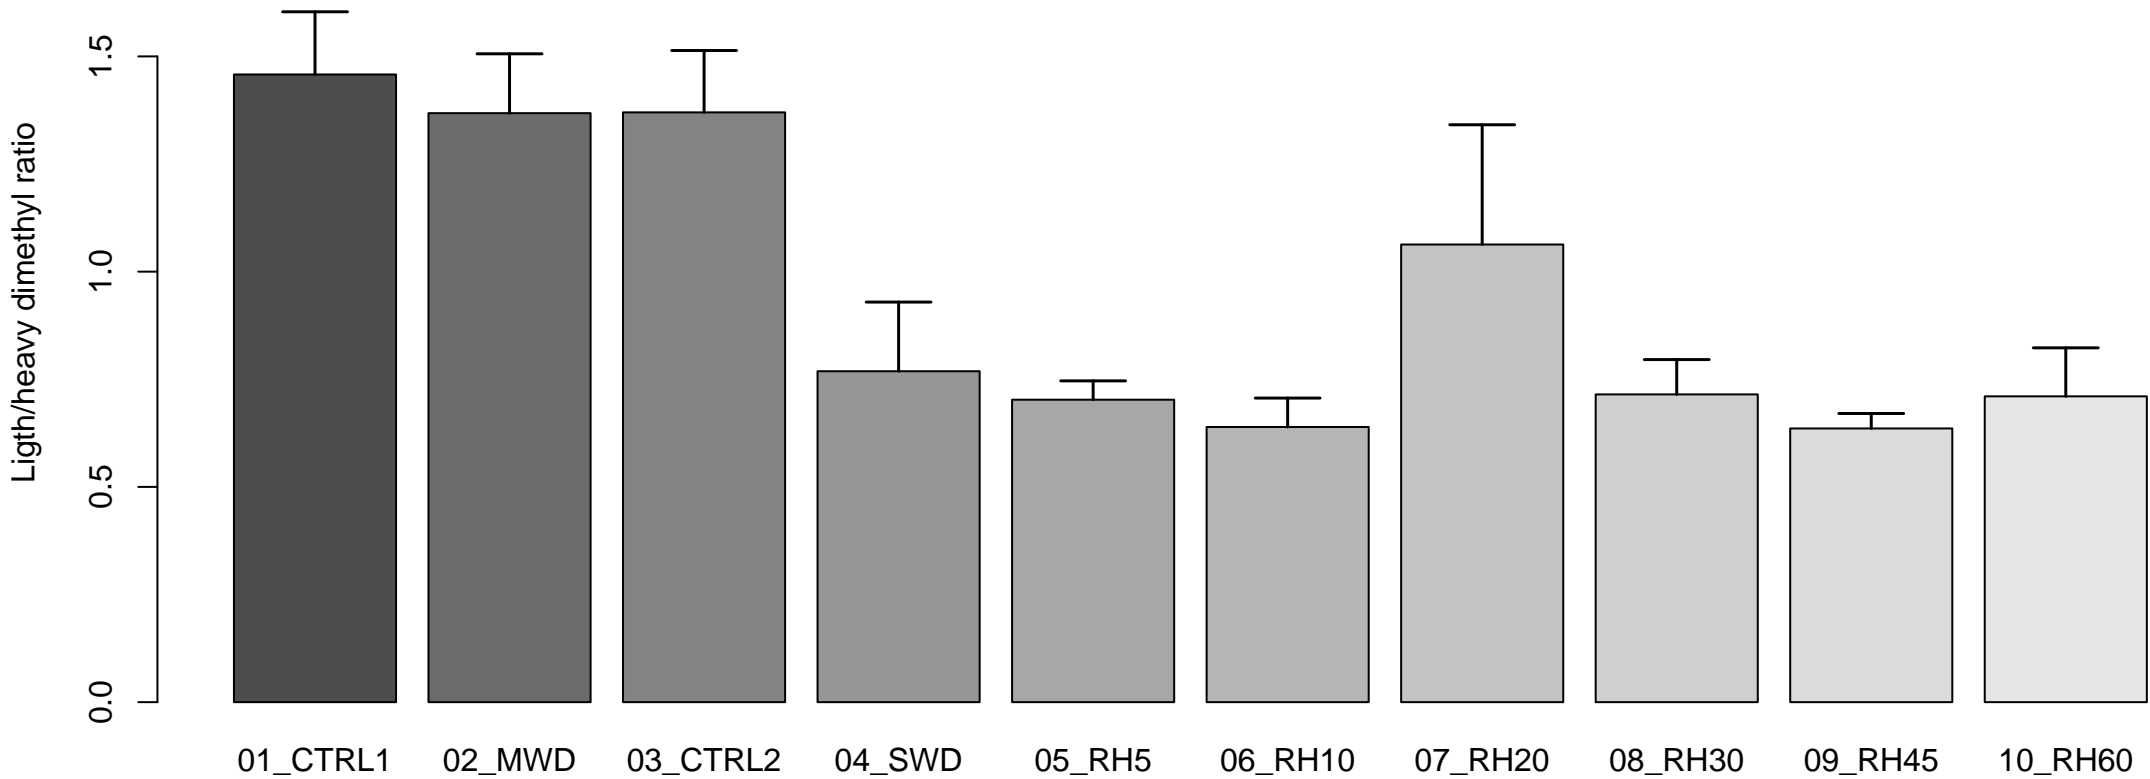

GRMZM2G041876\_P01

### Nuclear matrix constituent protein 1 # S934

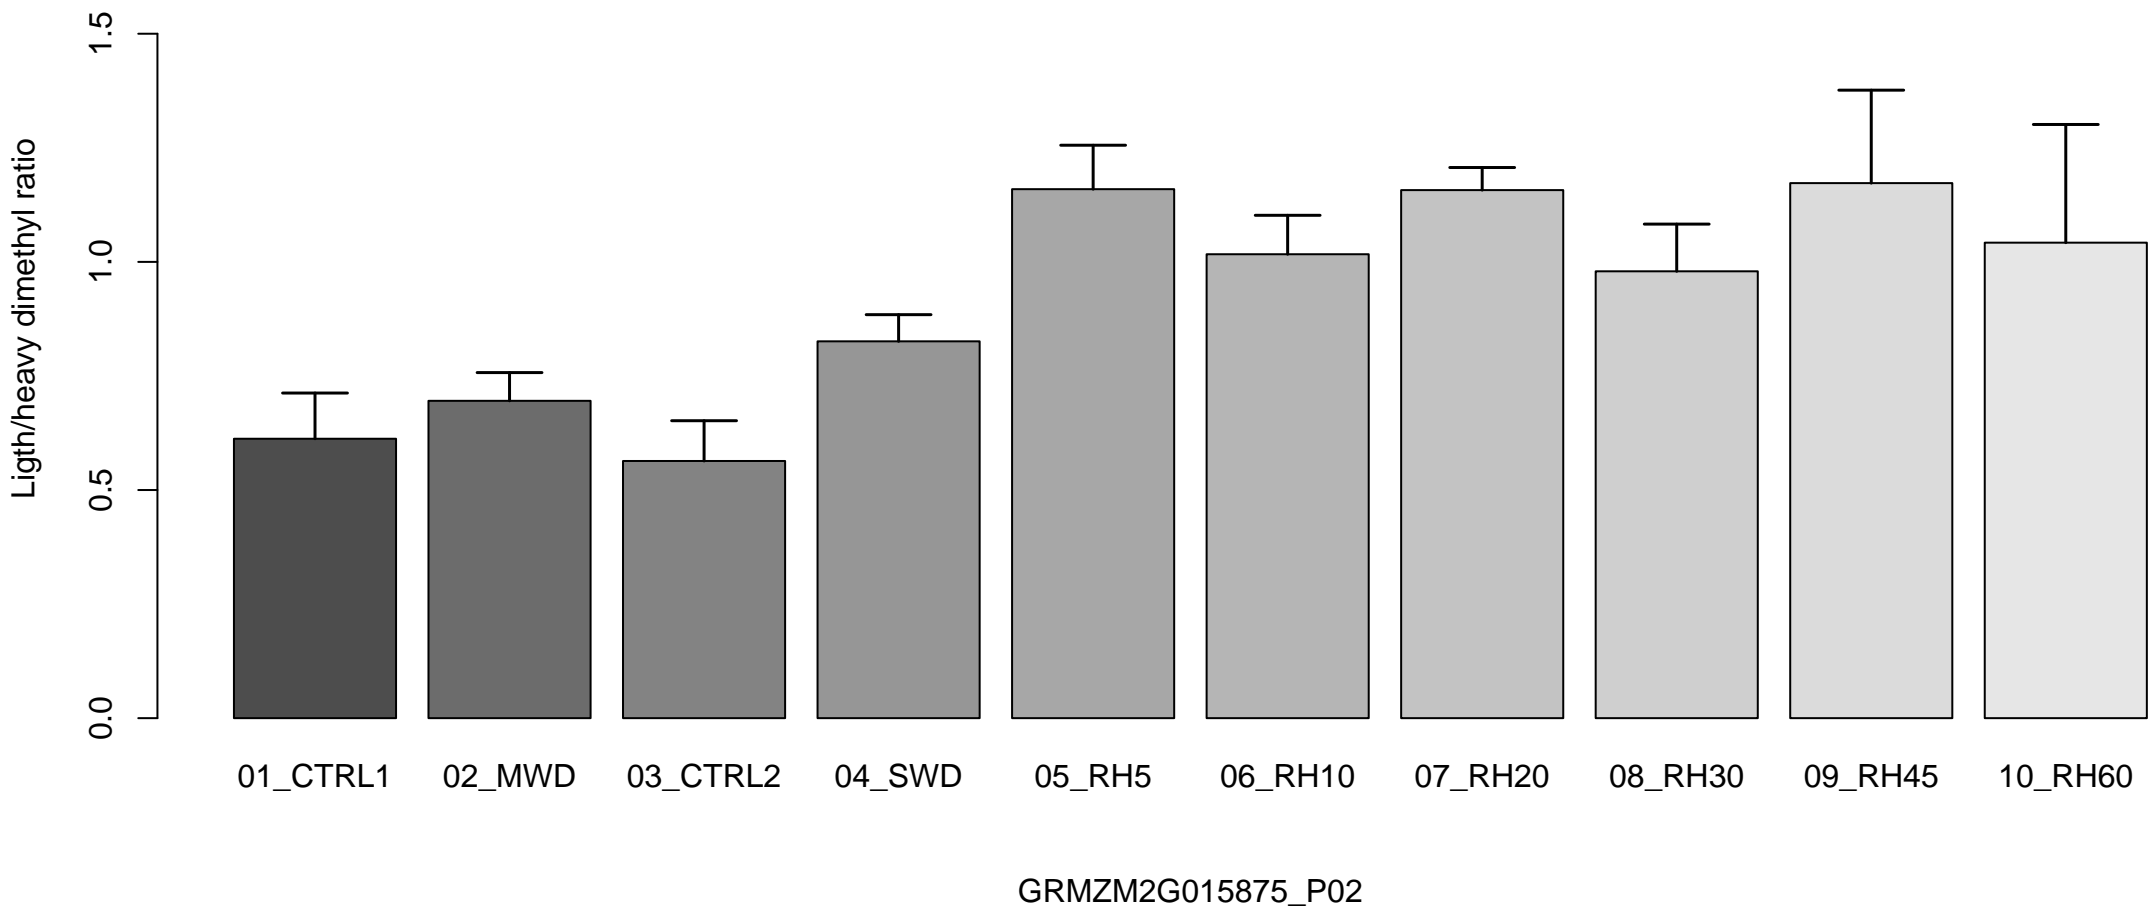

### Putative uncharacterized protein # S7

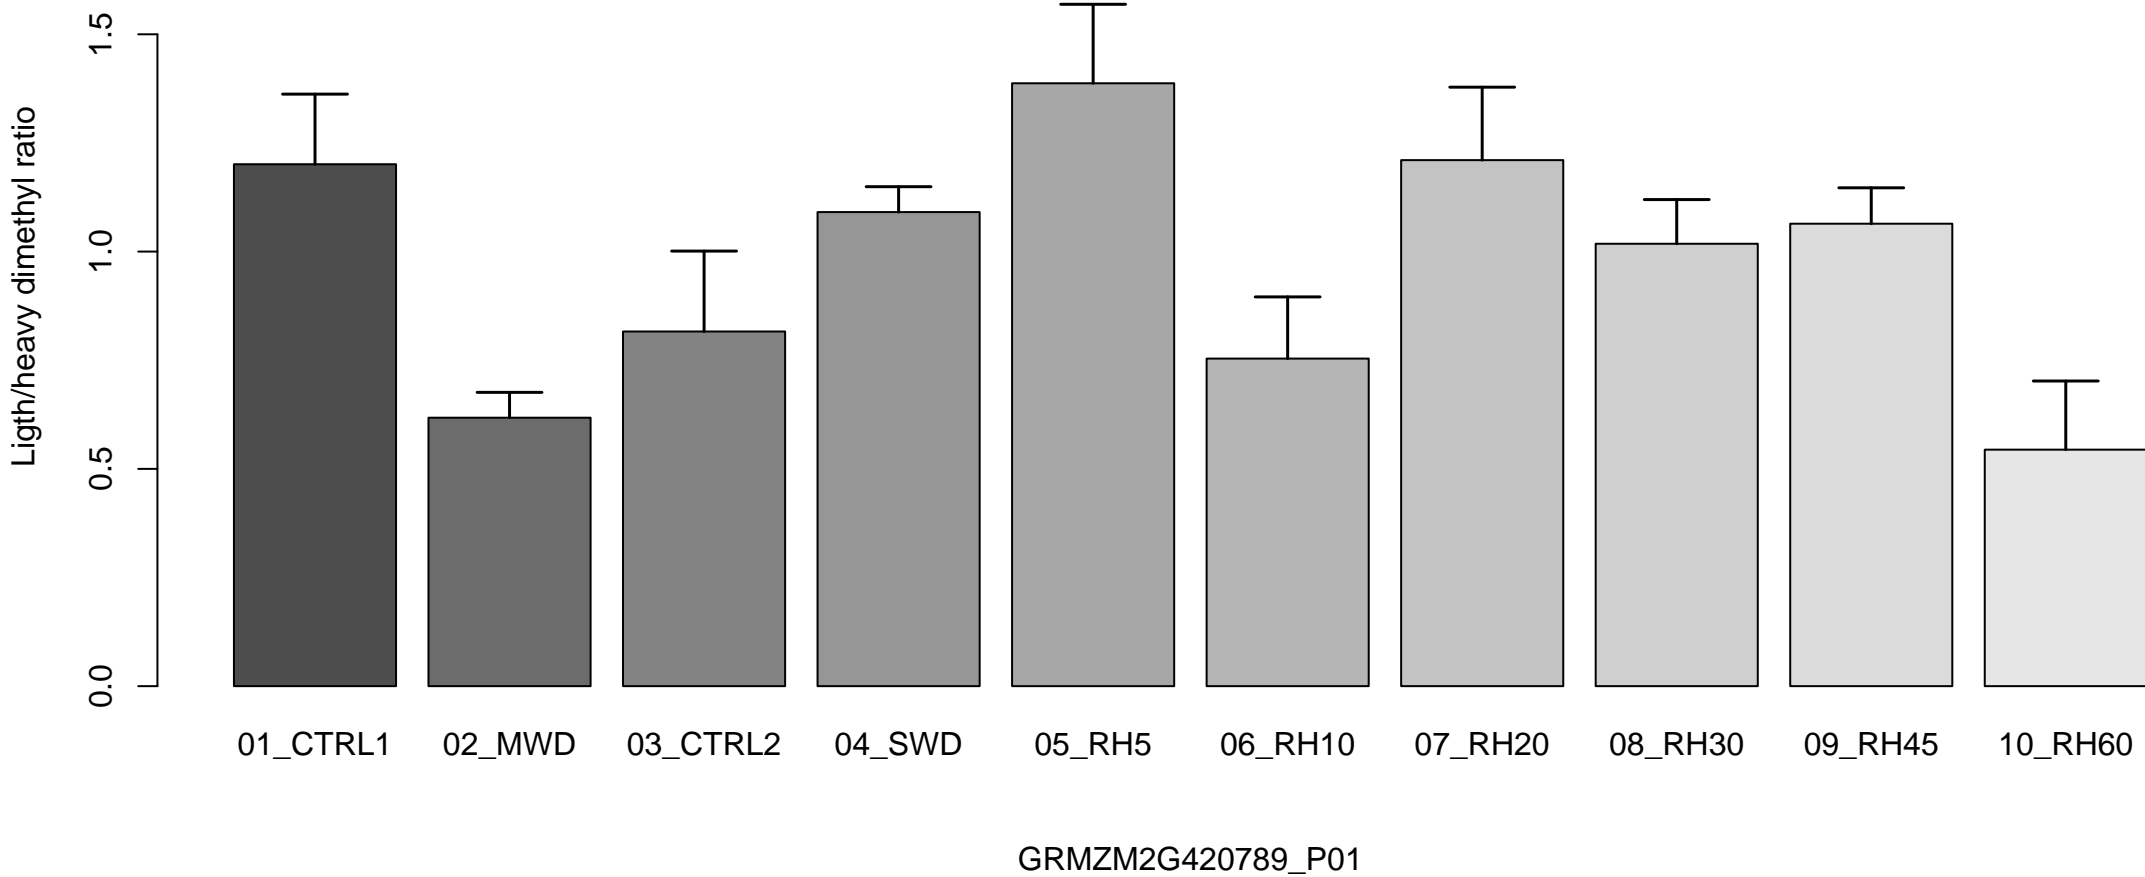

# DNA (cytosine-5)-methyltransferase 1 # S118

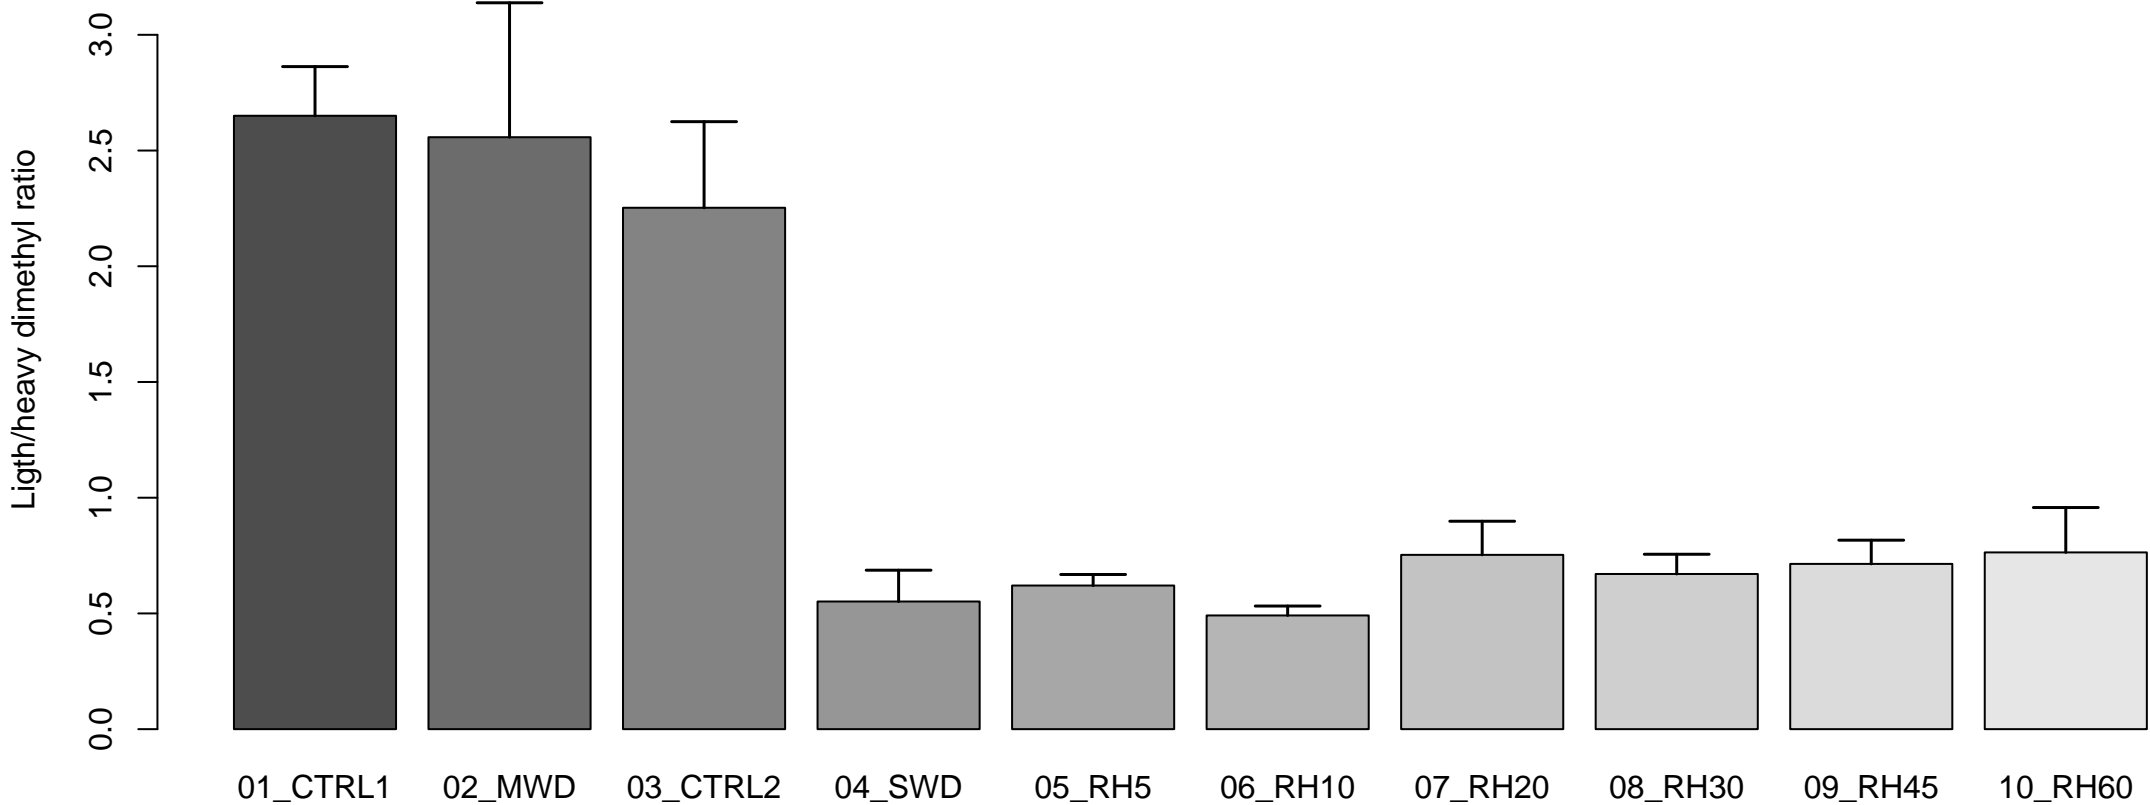

GRMZM2G025592\_P01



# DNA (cytosine-5)-methyltransferase 1 # S5

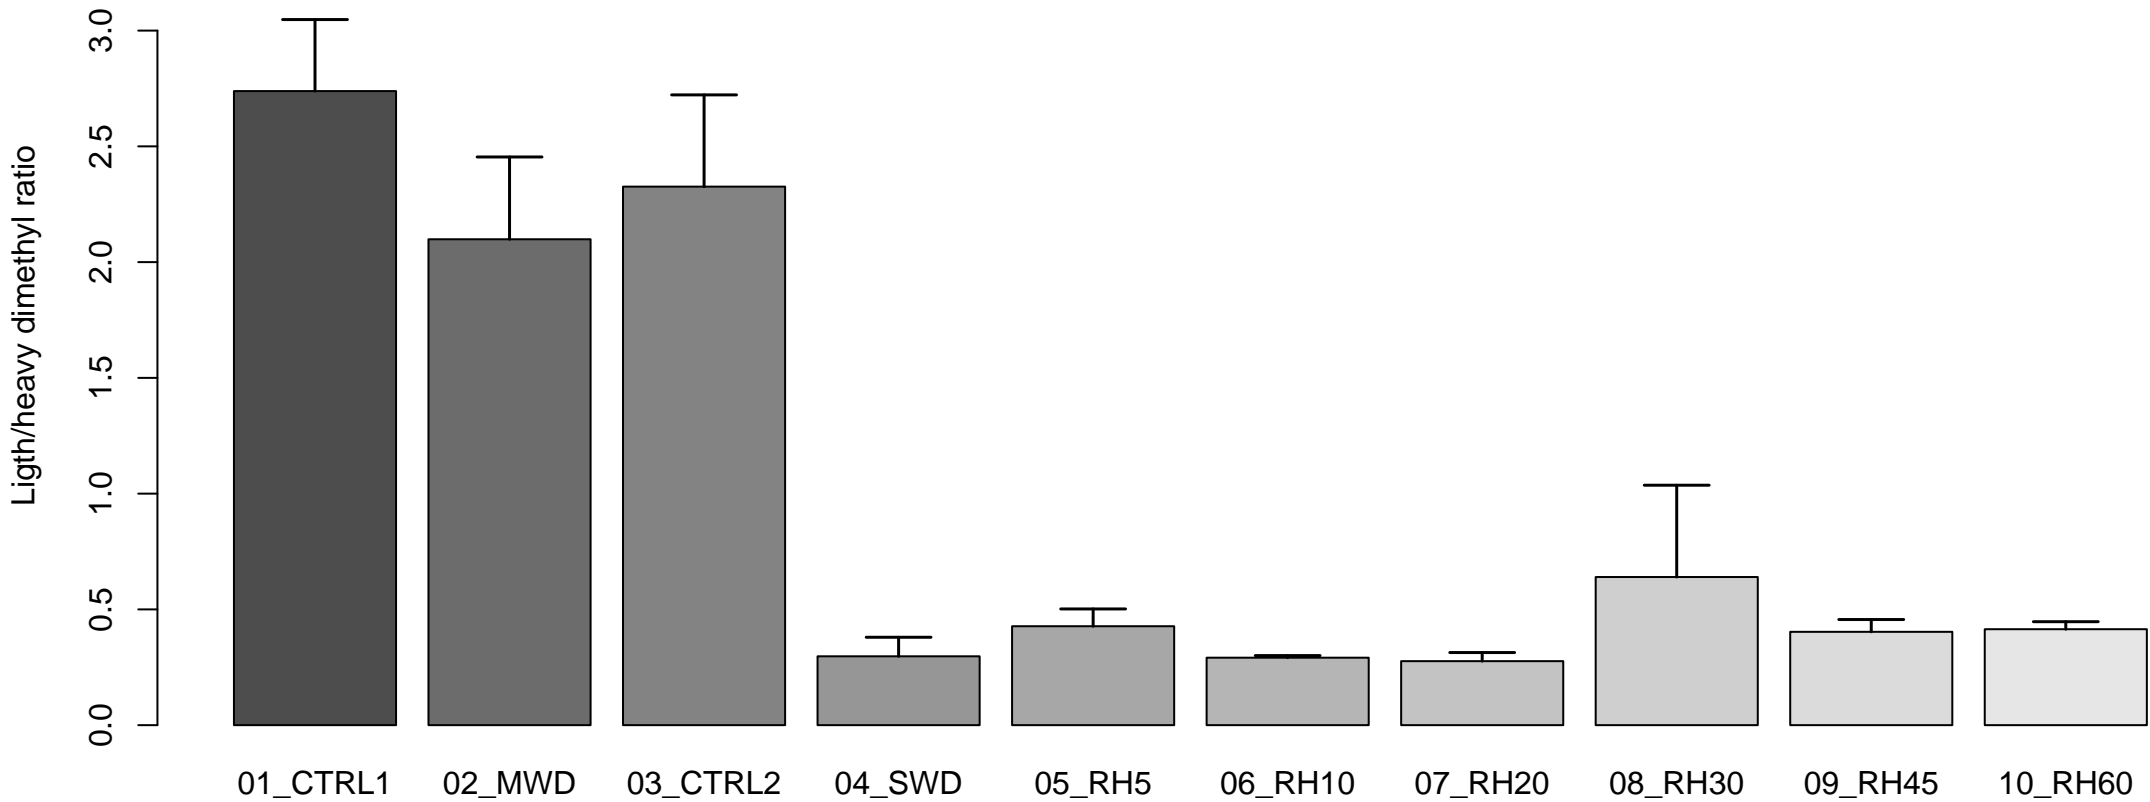

GRMZM2G025592\_P01

### Putative uncharacterized protein # S14

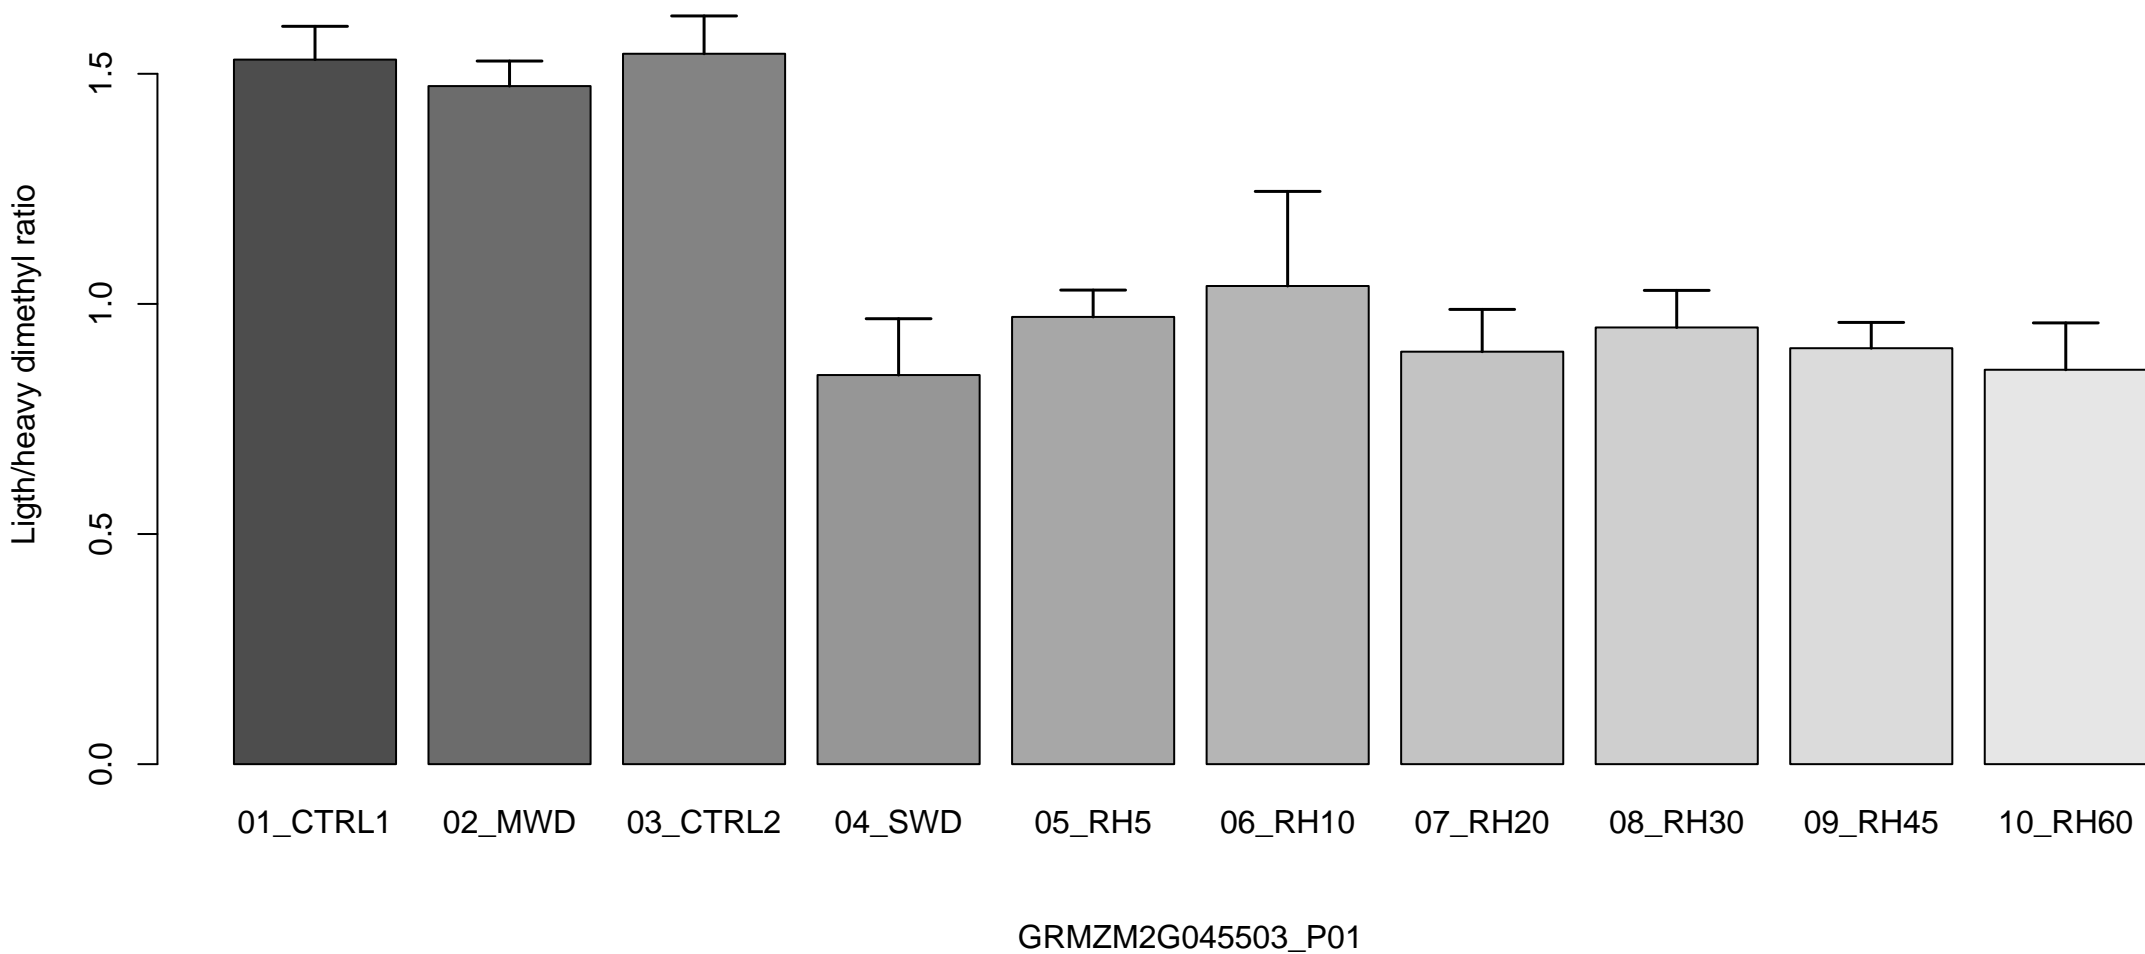

### Putative methyl-binding domain protein MBD115 # S138/T144

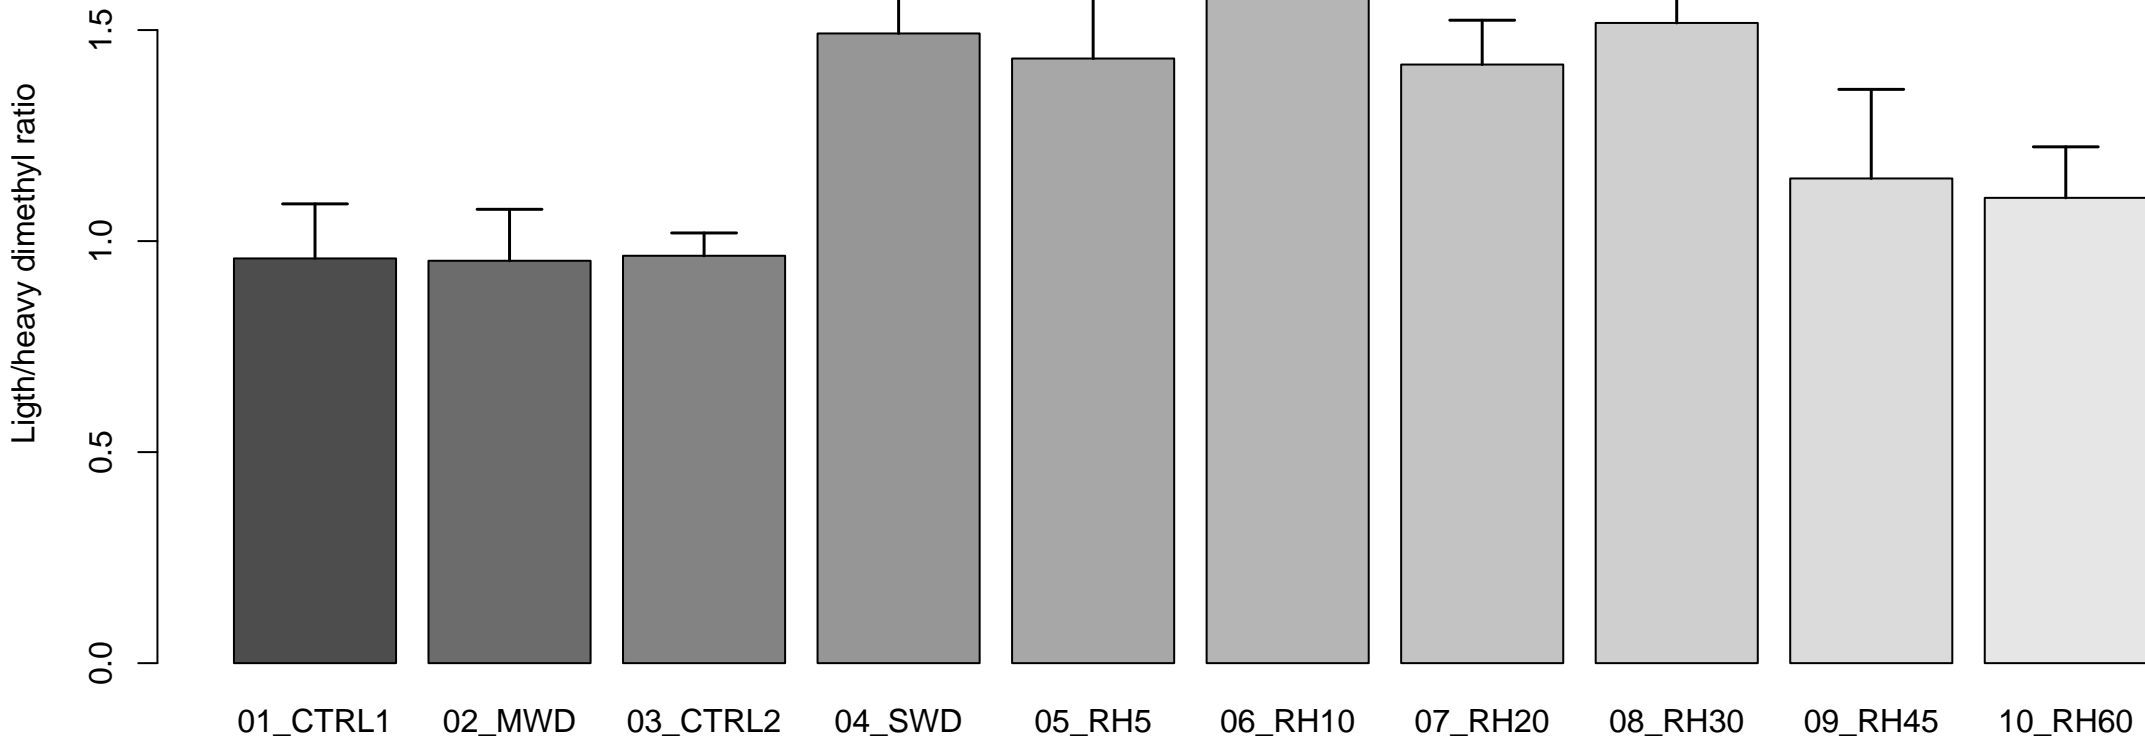

GRMZM2G157470\_P01

### Putative methyl-binding domain protein MBD115 # S341

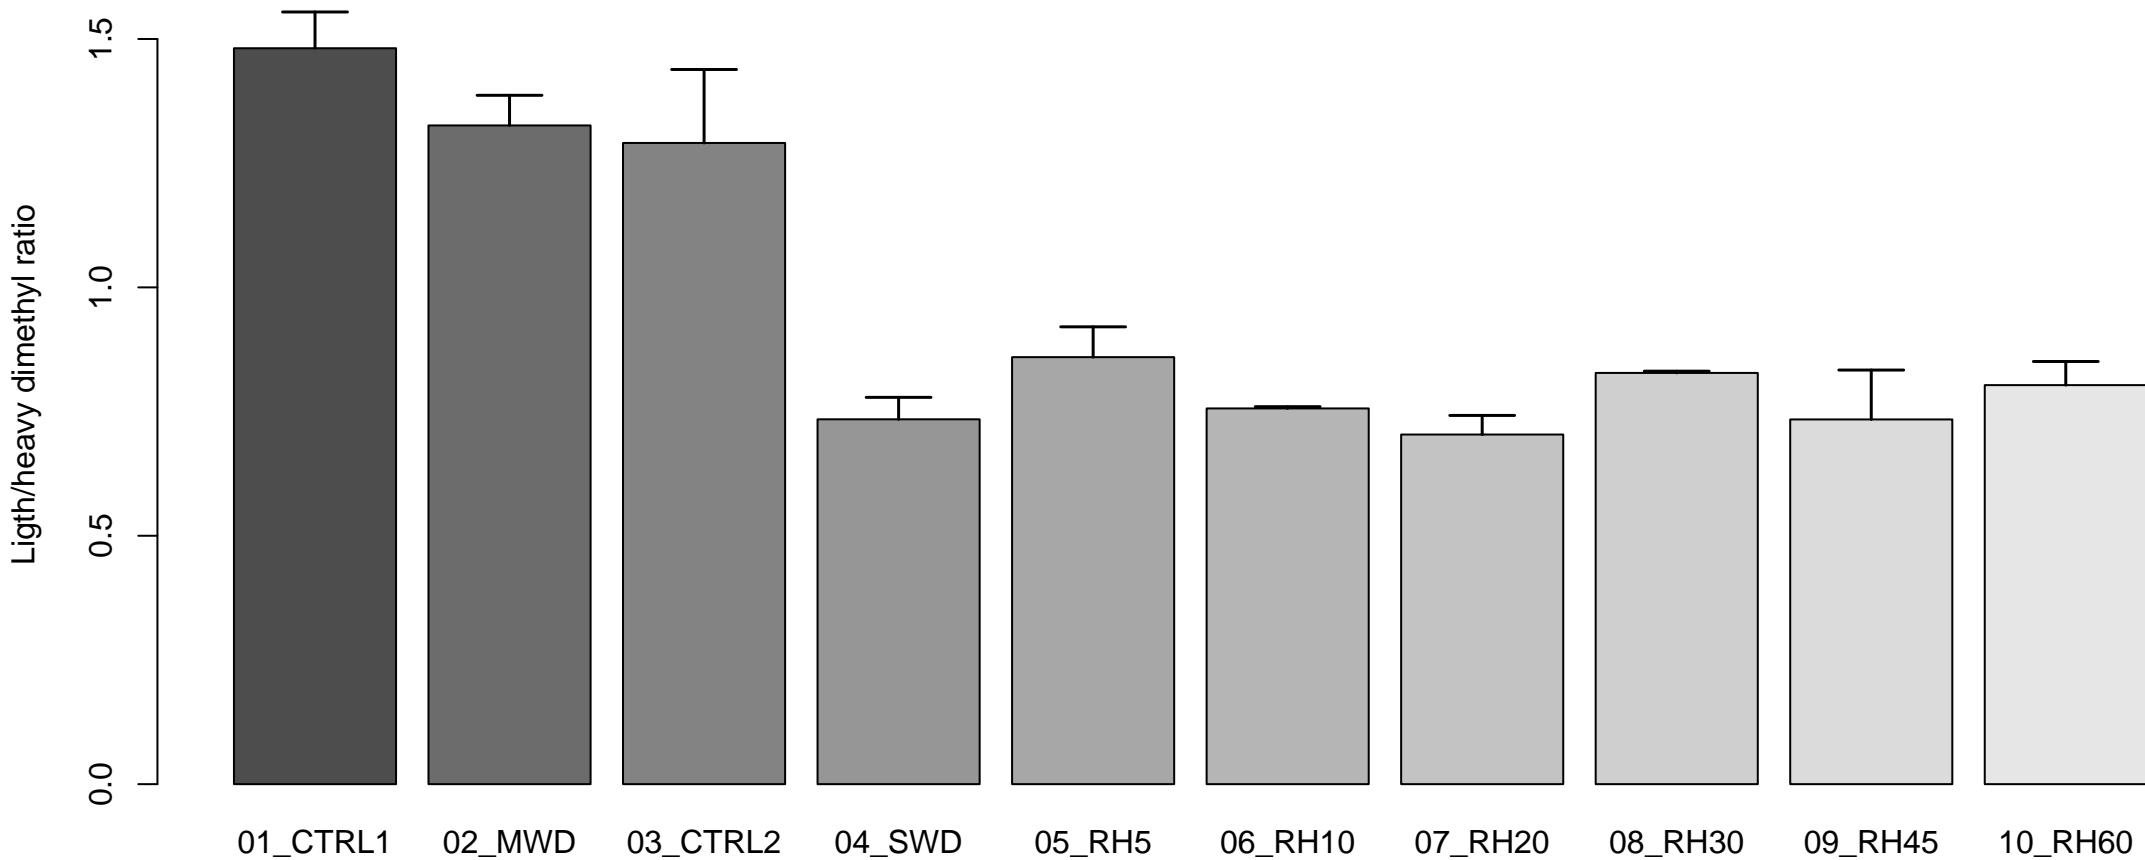

GRMZM2G157470\_P01

### Carbohydrate transporter/ sugar porter/ transporter # S5

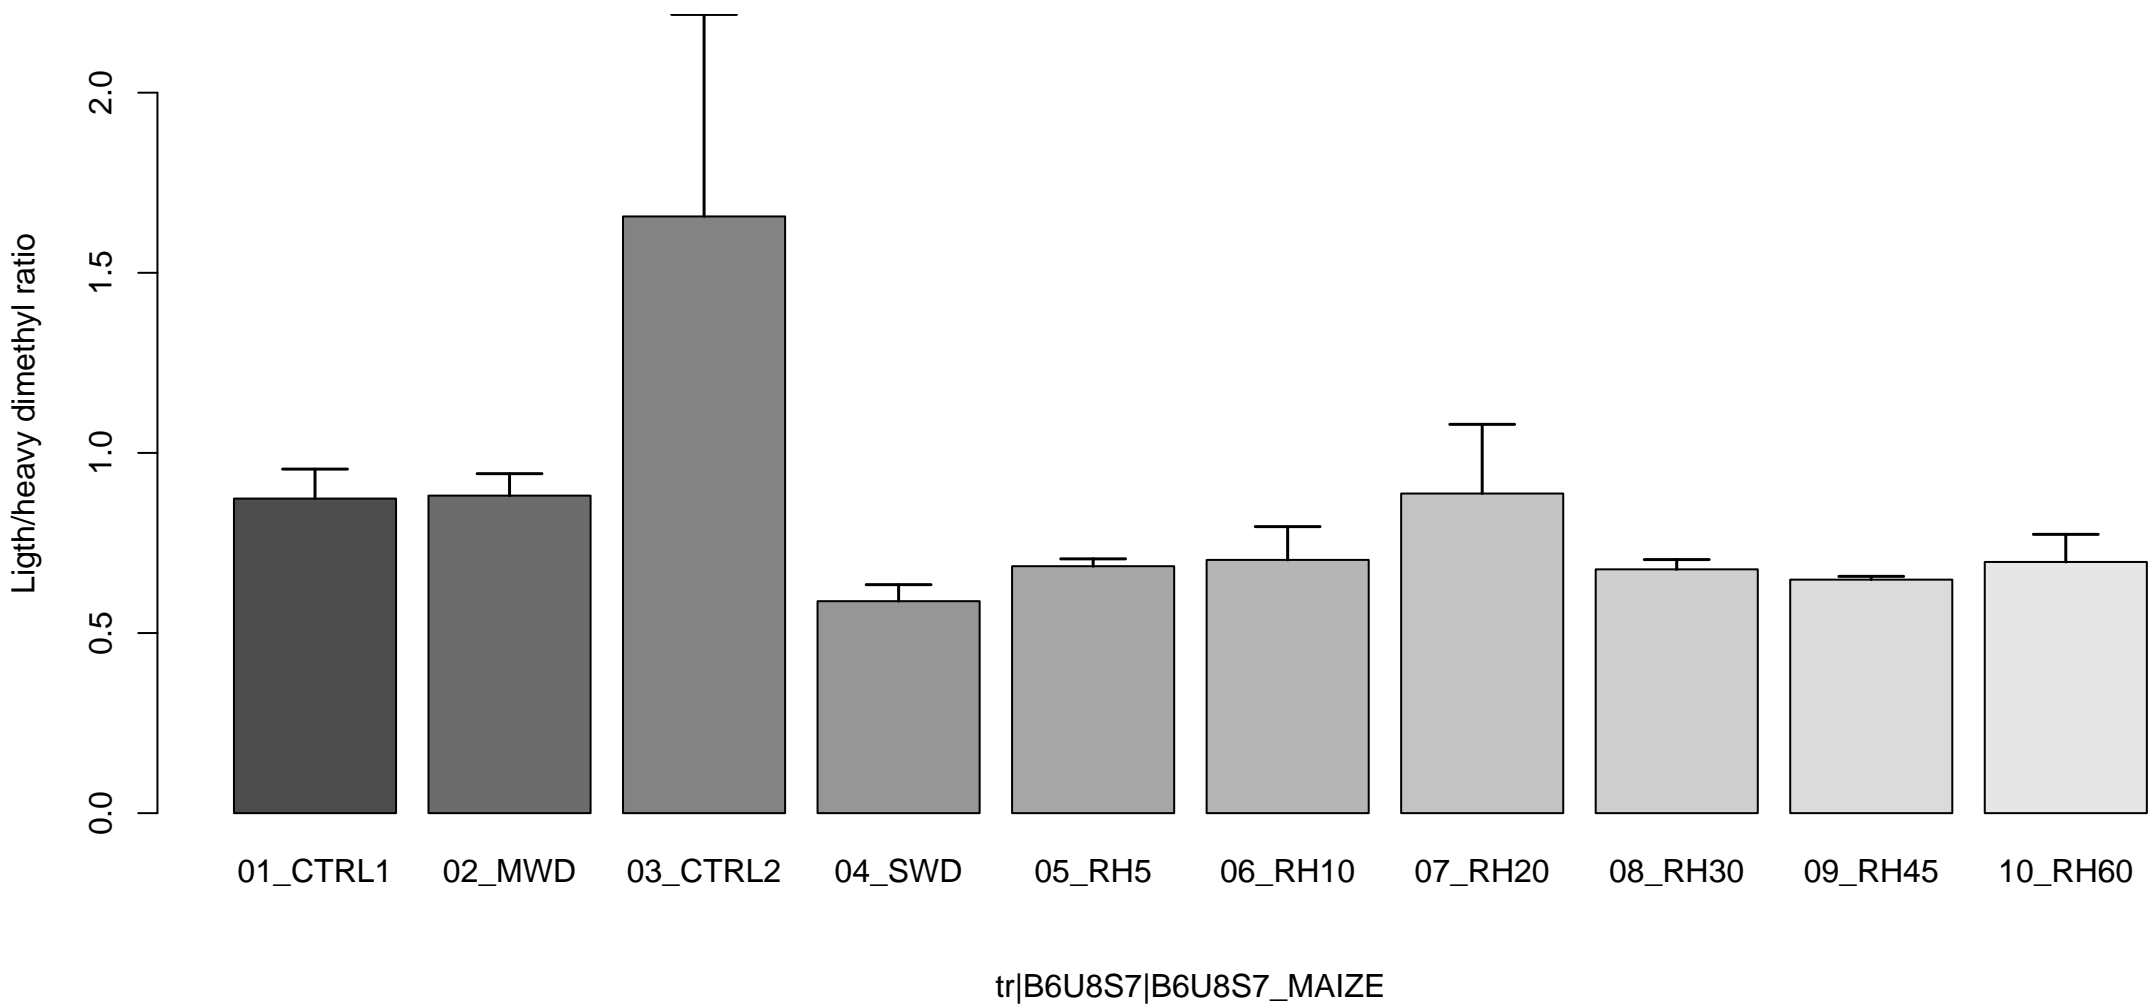

### Gb protein # S19/T21

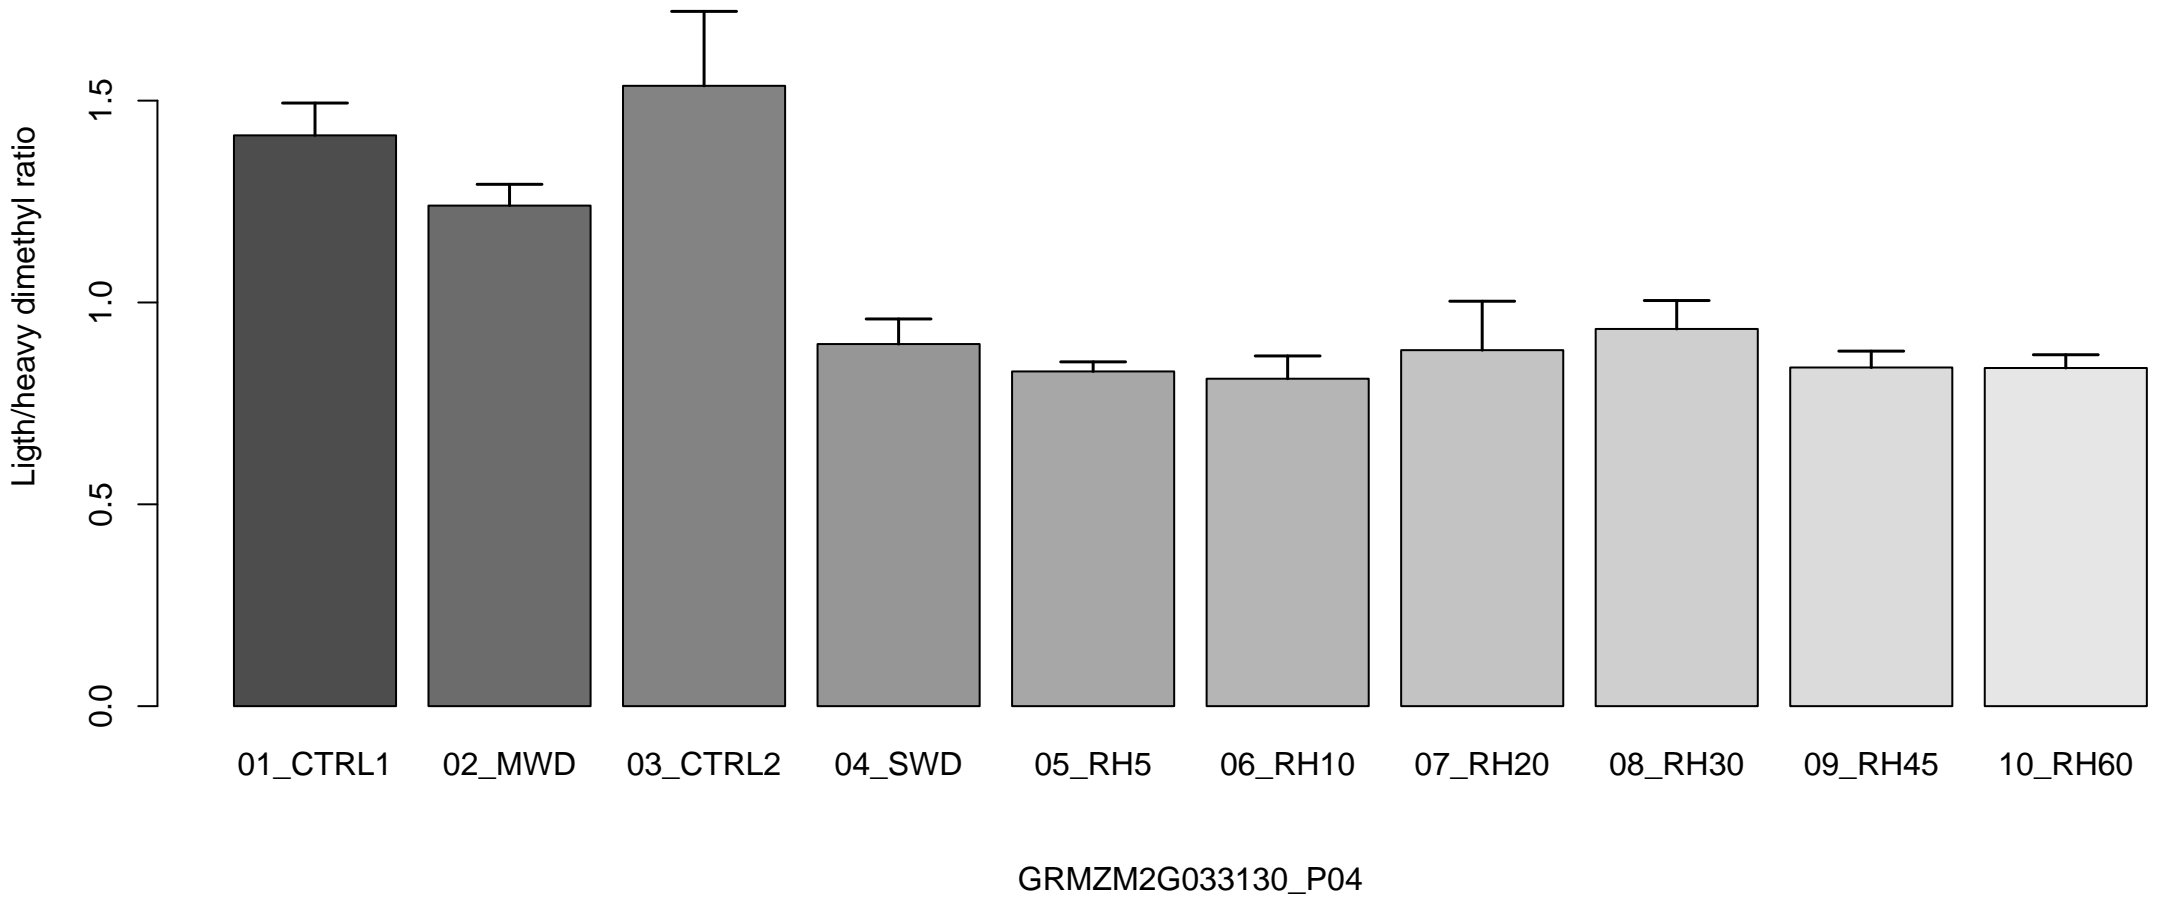

GRMZM2G033130\_P04

### Early fruit mRNA # S258

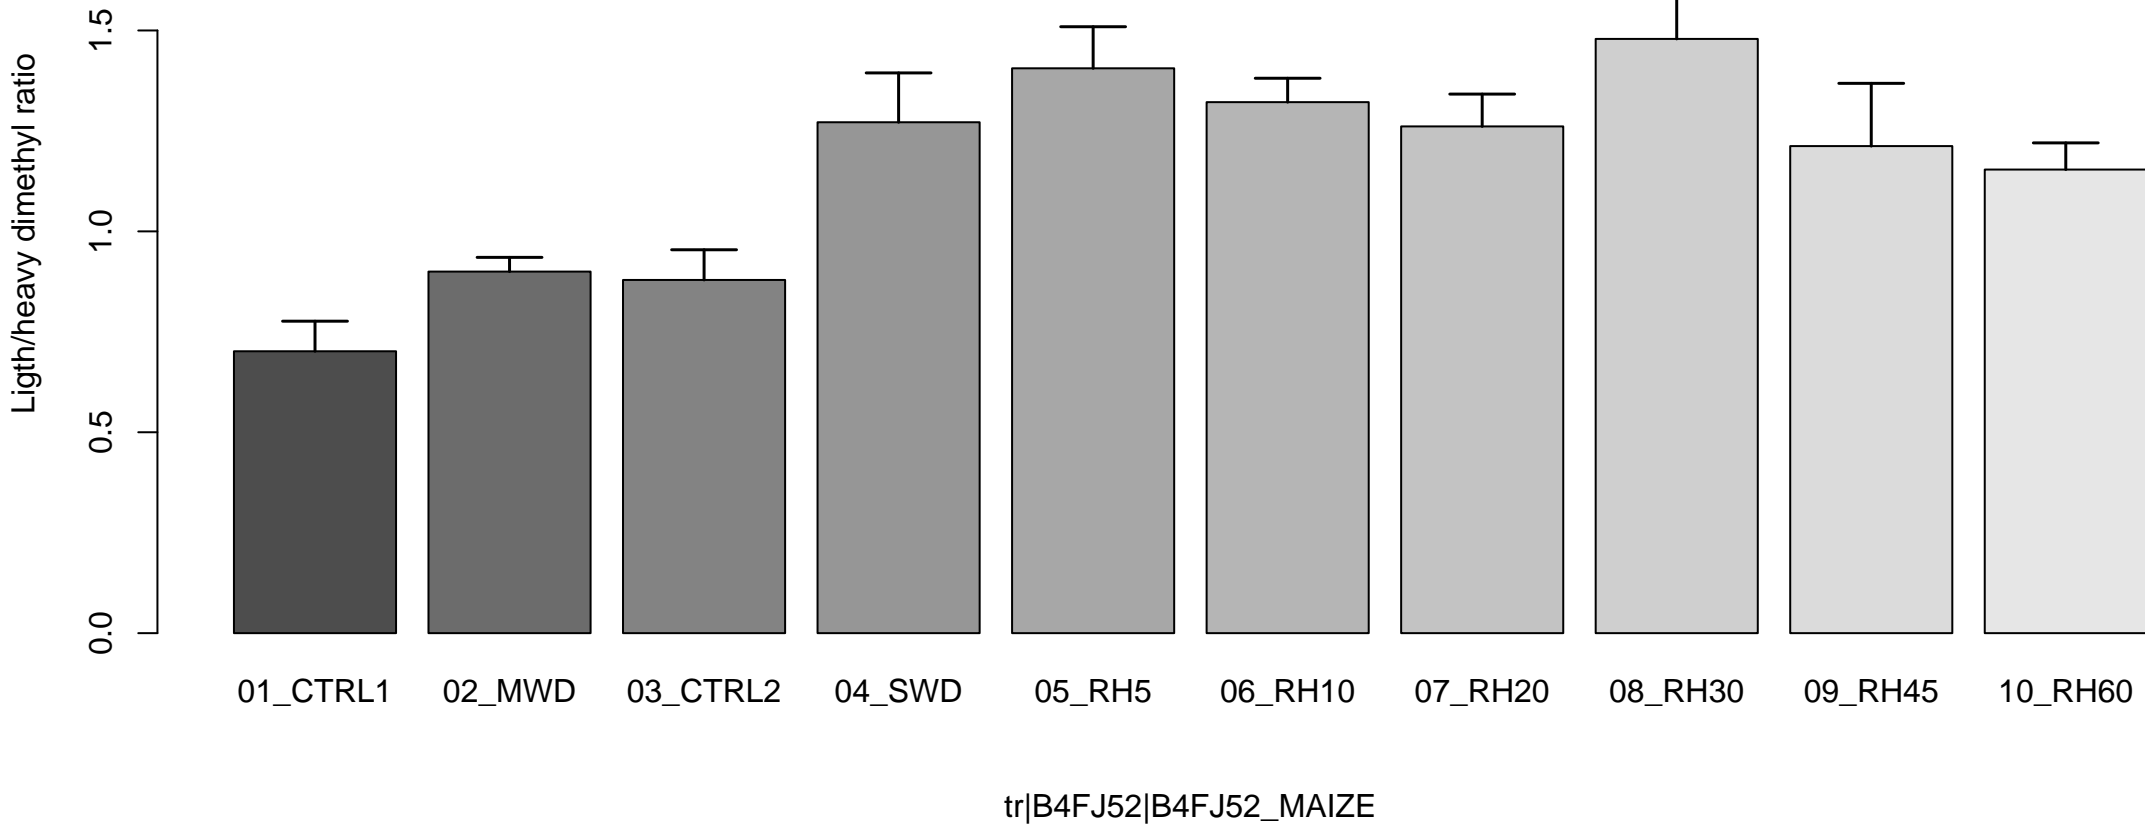

### Putative uncharacterized protein # S153

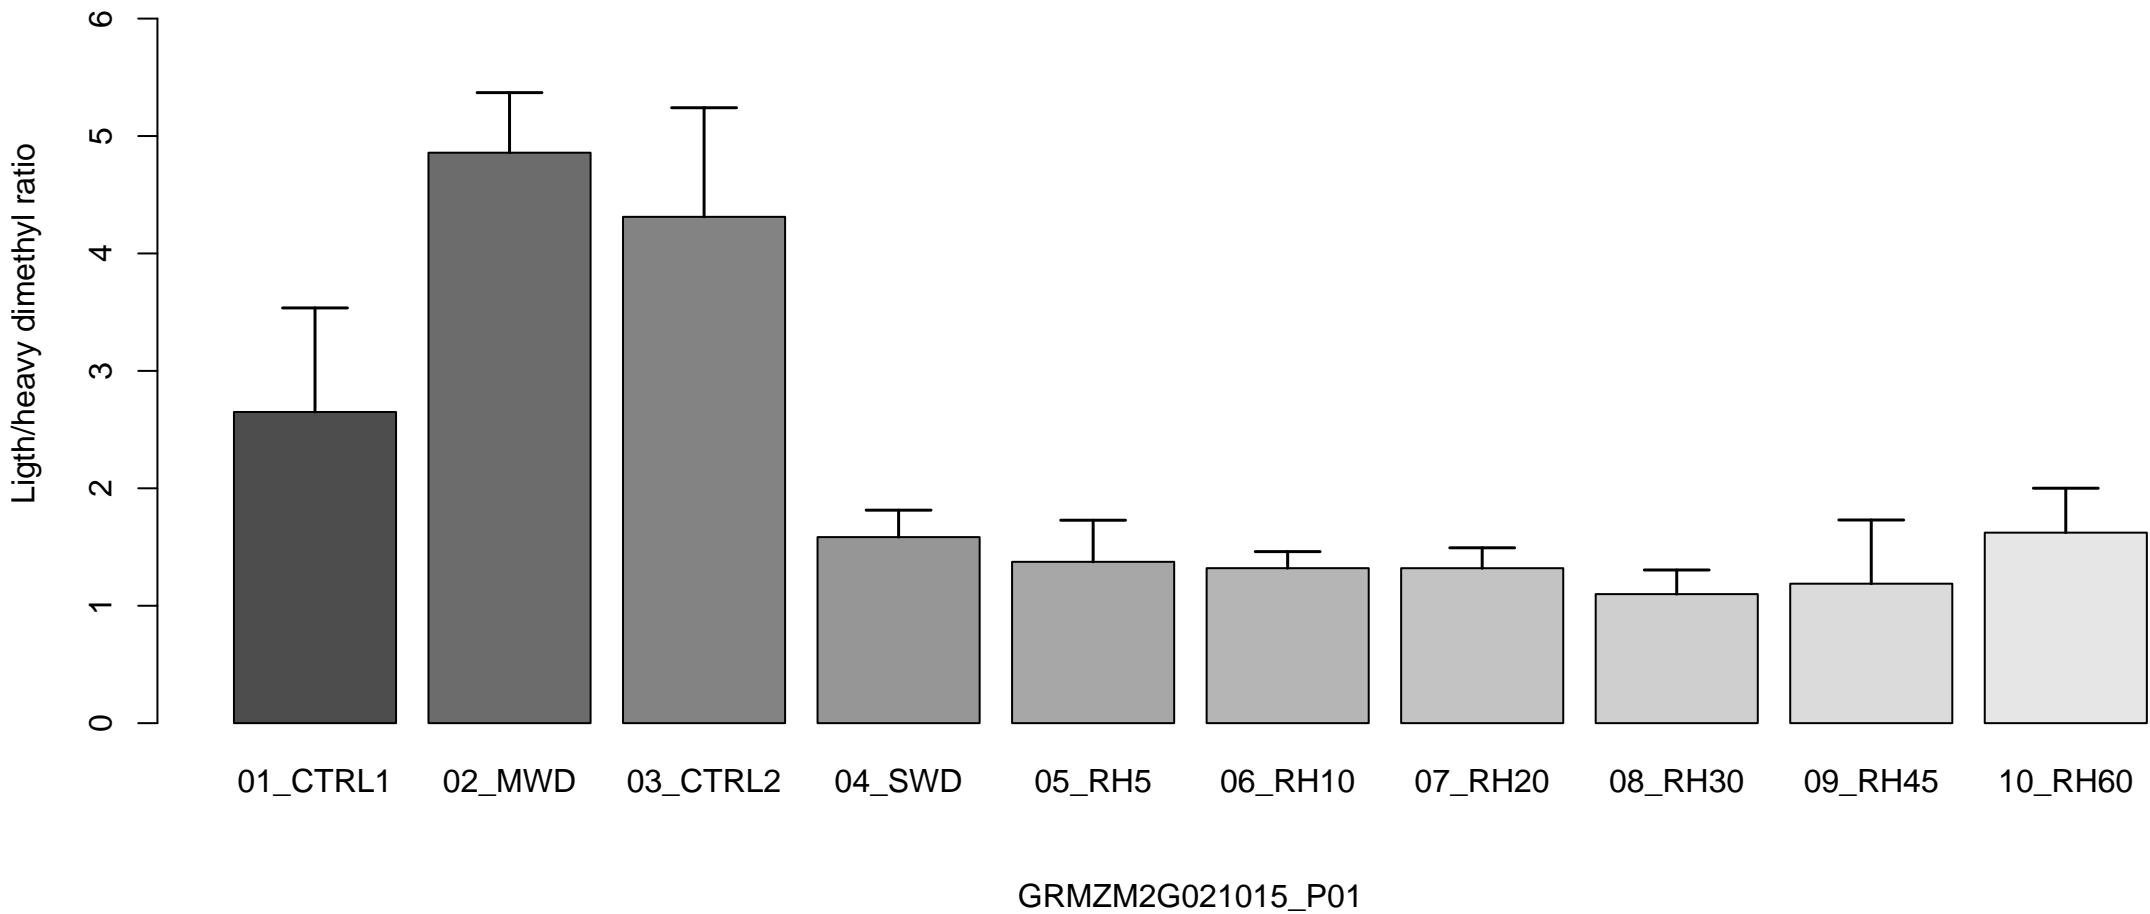



### SeIT/seIW/seIH selenoprotein domain containing protein # S17

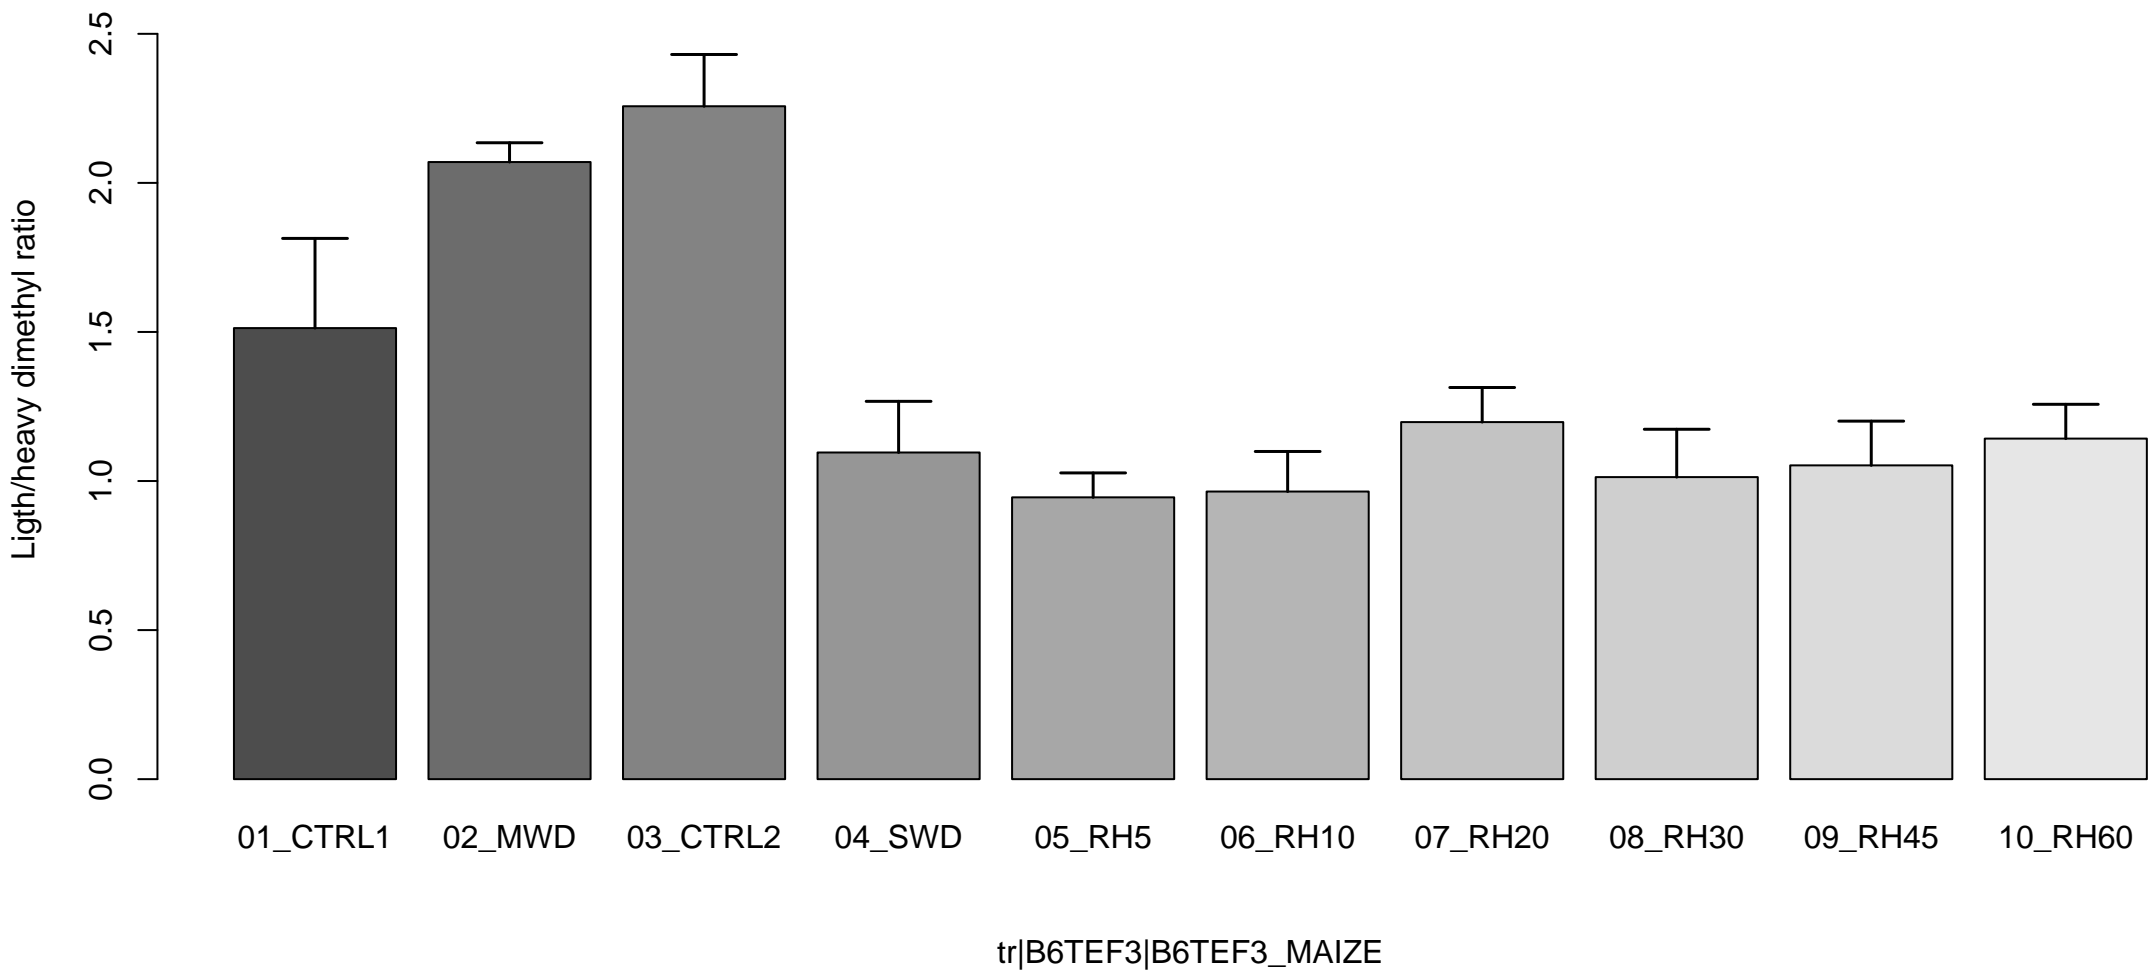

### Putative methyl-binding domain protein MBD105 # S252

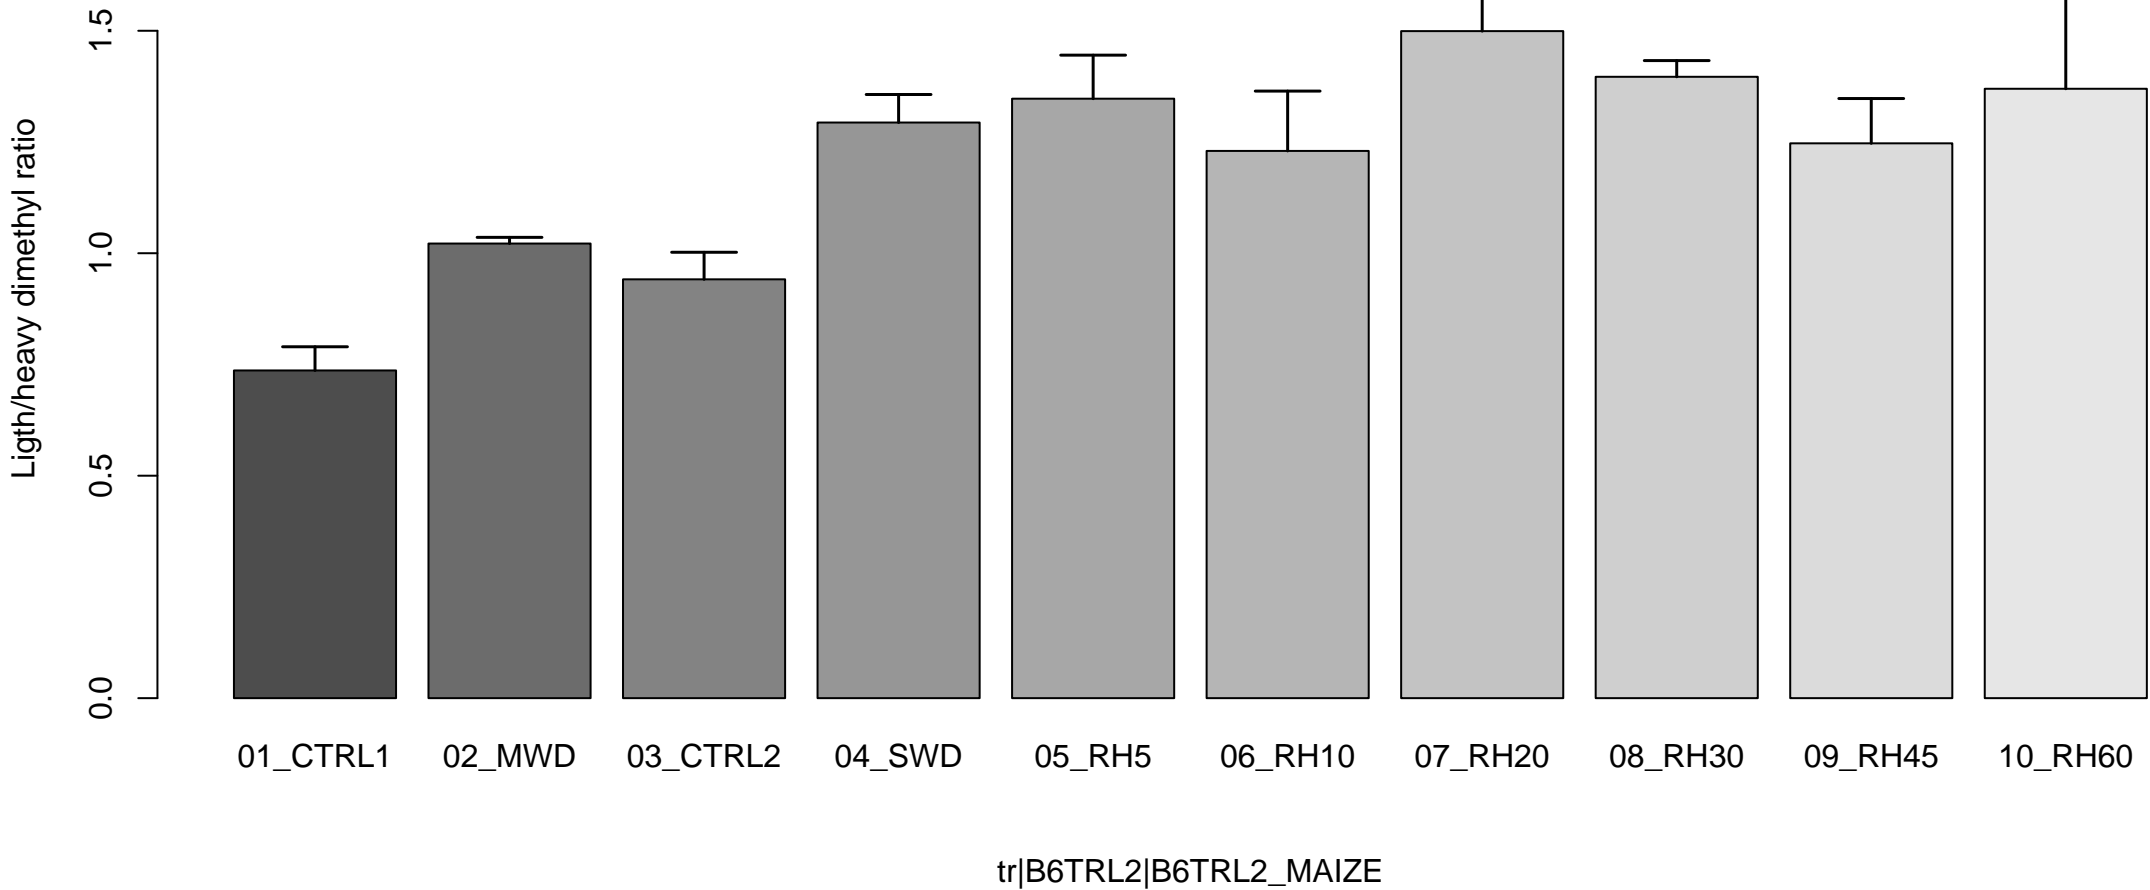

### MDR-like ABC transporter # S382

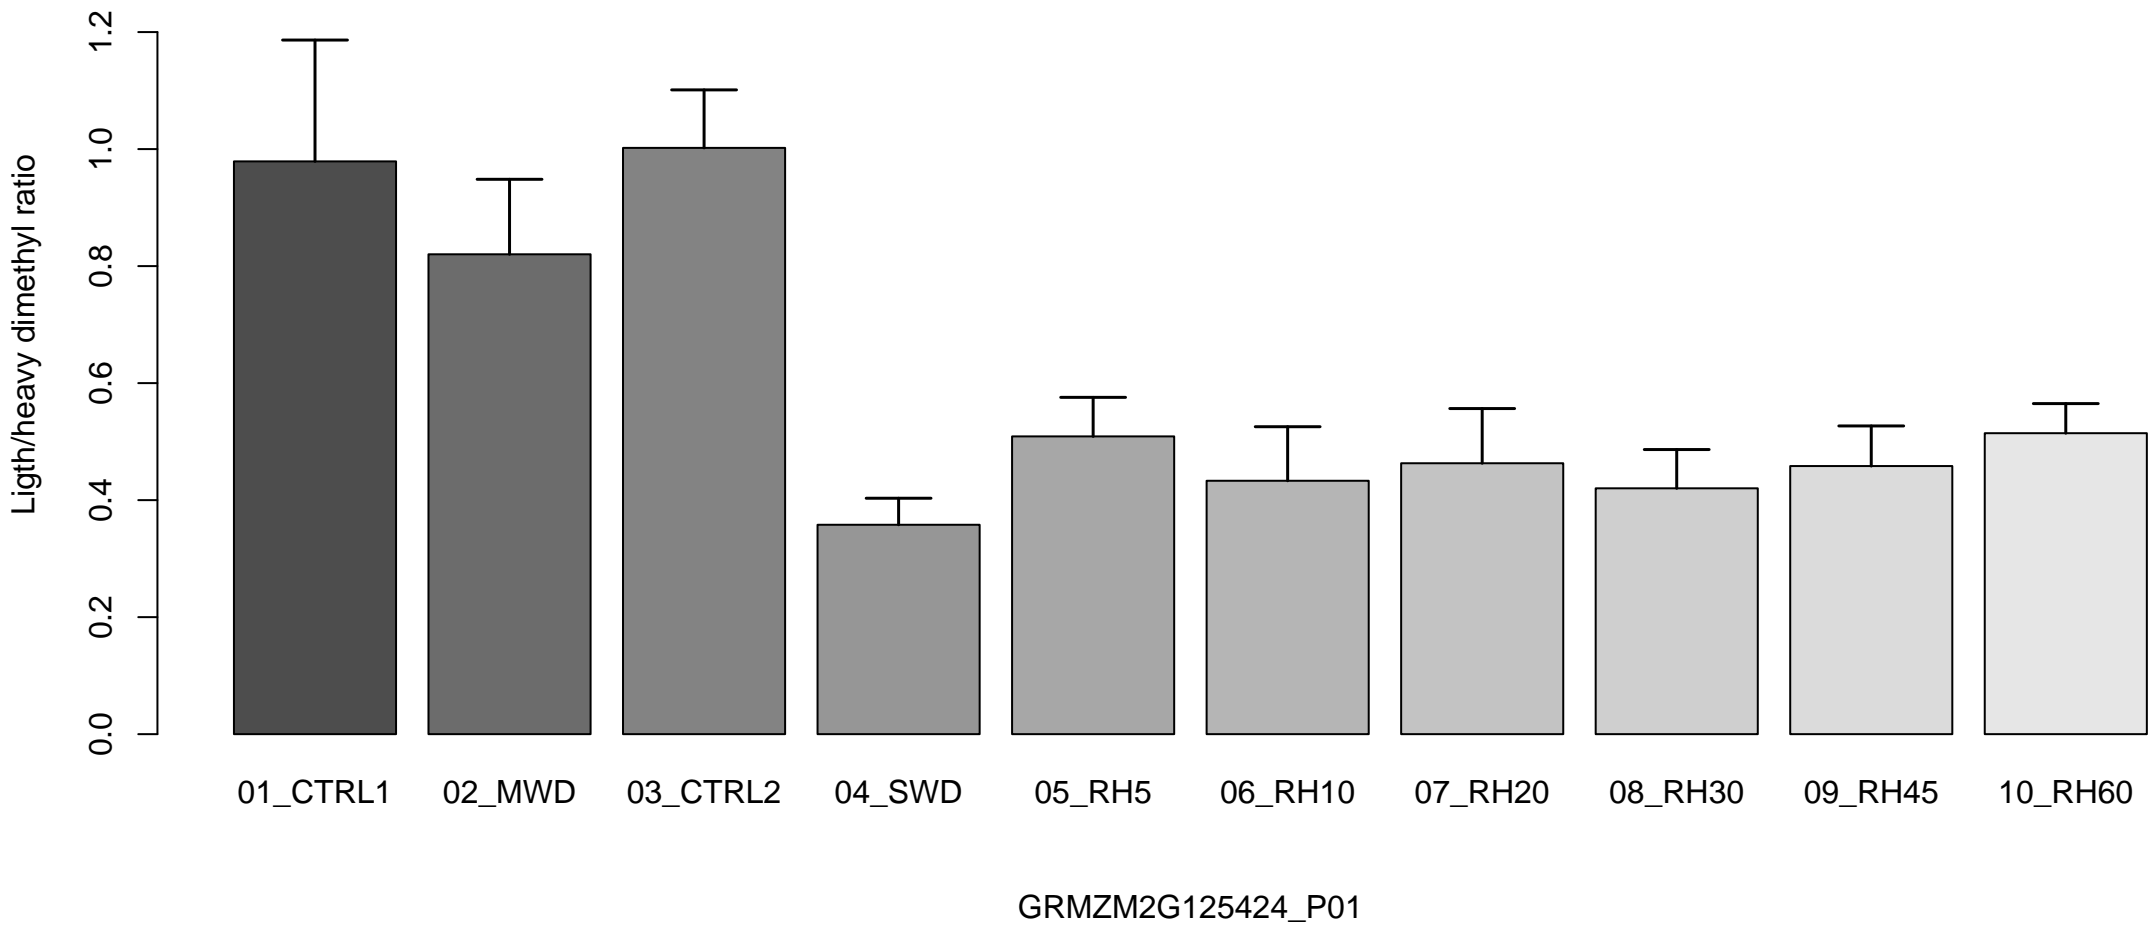

### Putative methyl-binding domain protein MBD105 # S332

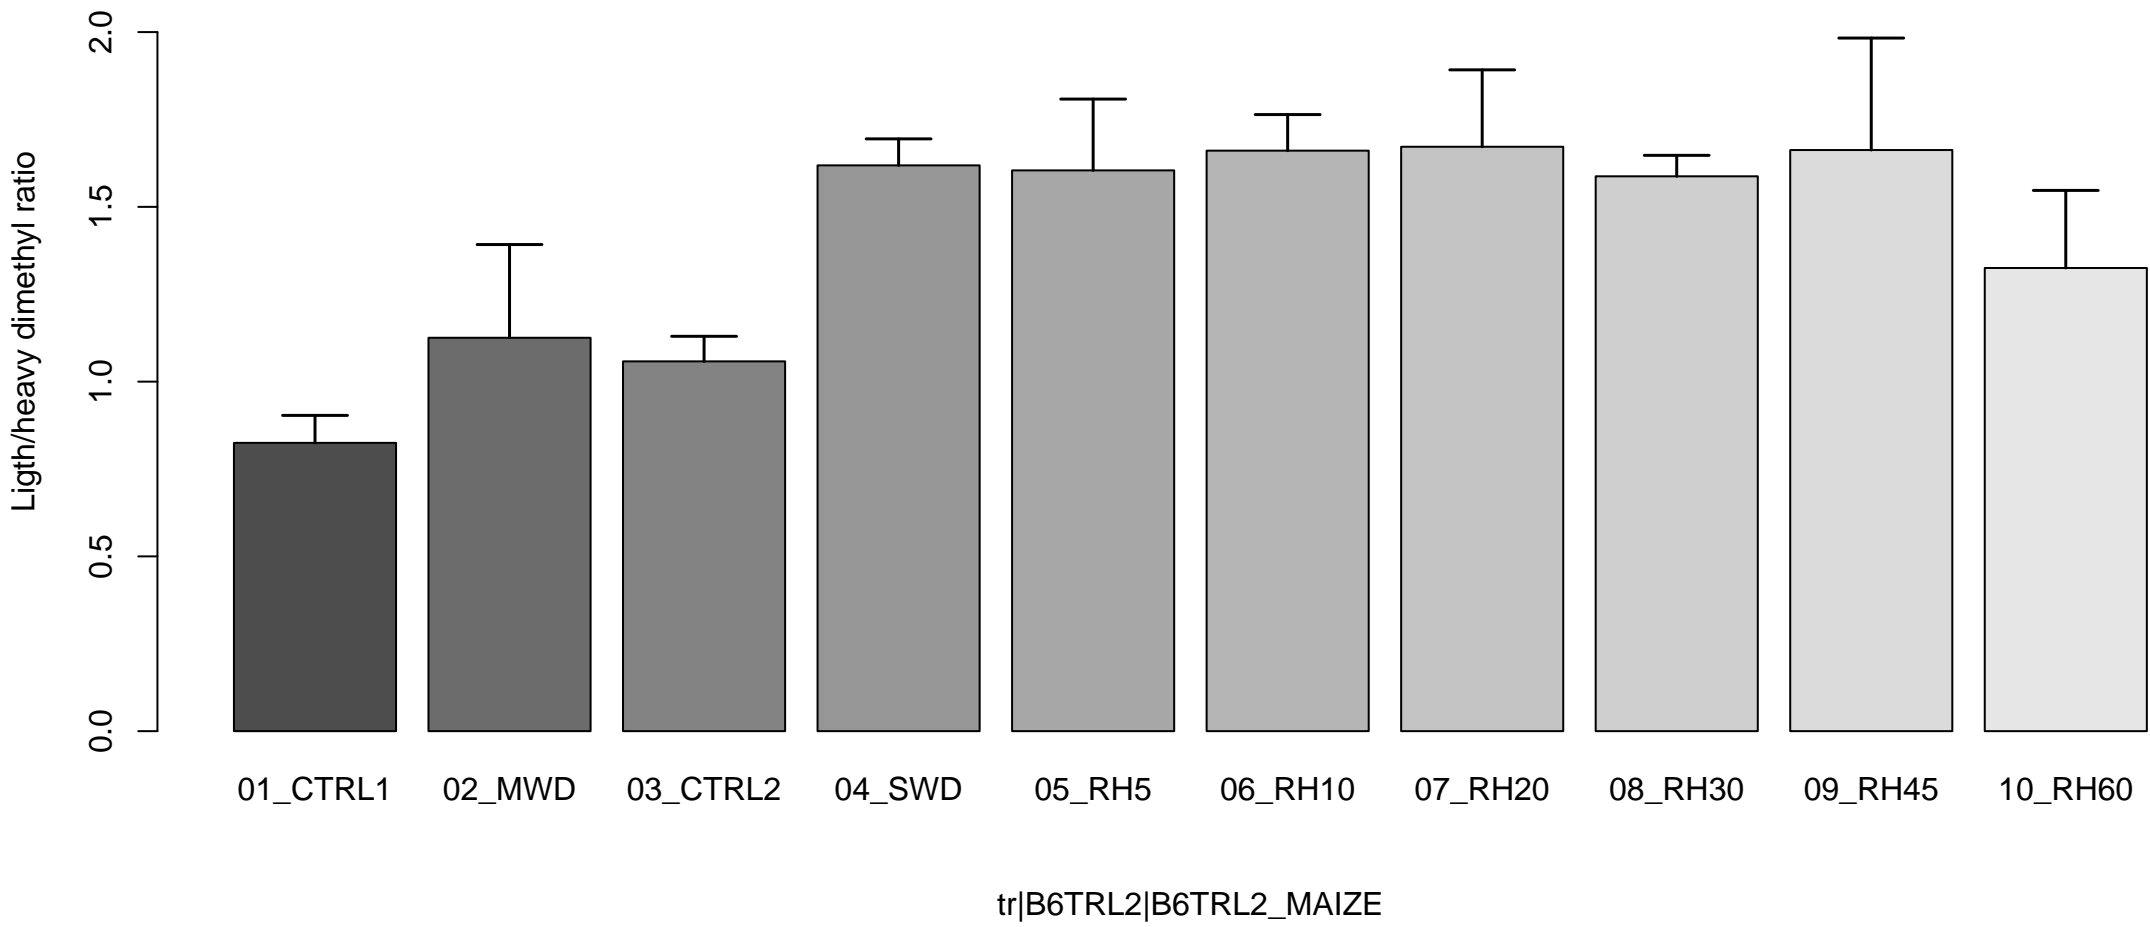

### Putative methyl-binding domain protein MBD105 # S300

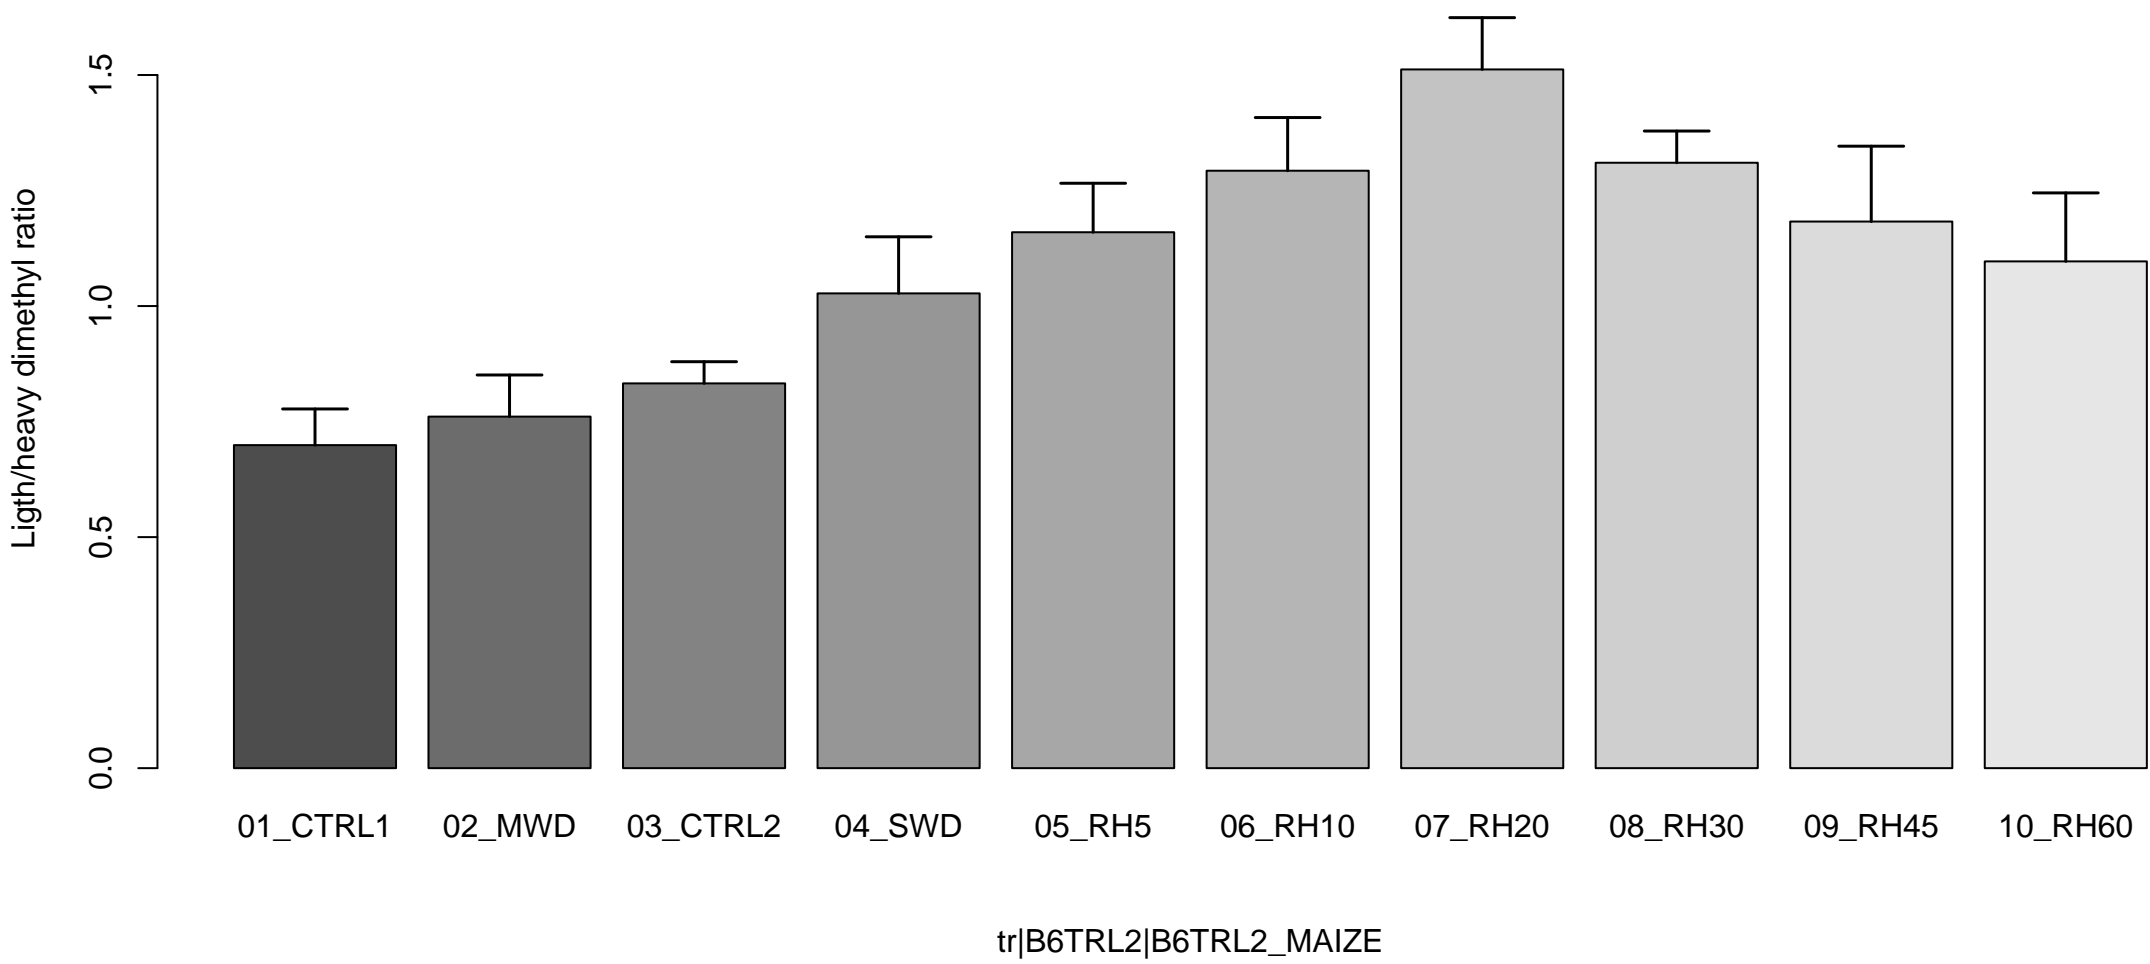

### Calmodulin-related protein 2, touch-induced # S66

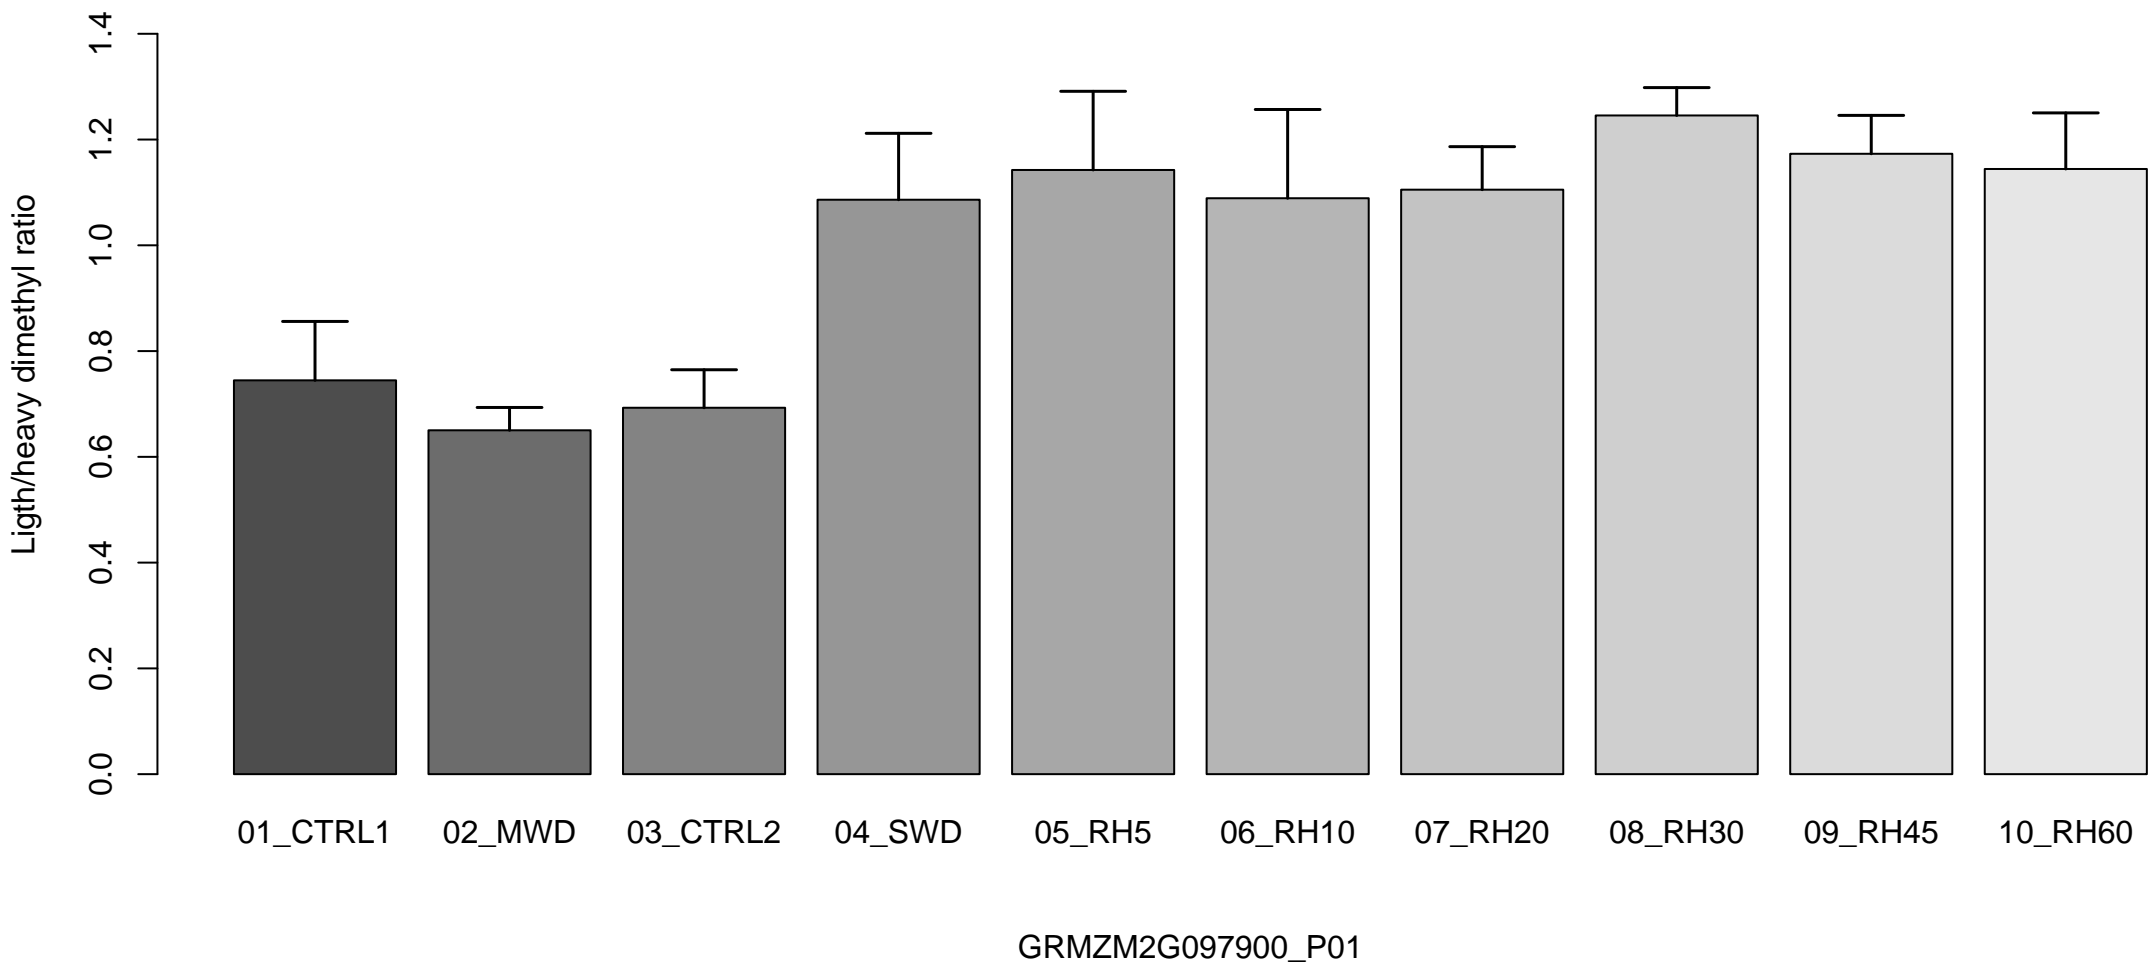

### MDR-like ABC transporter # S541

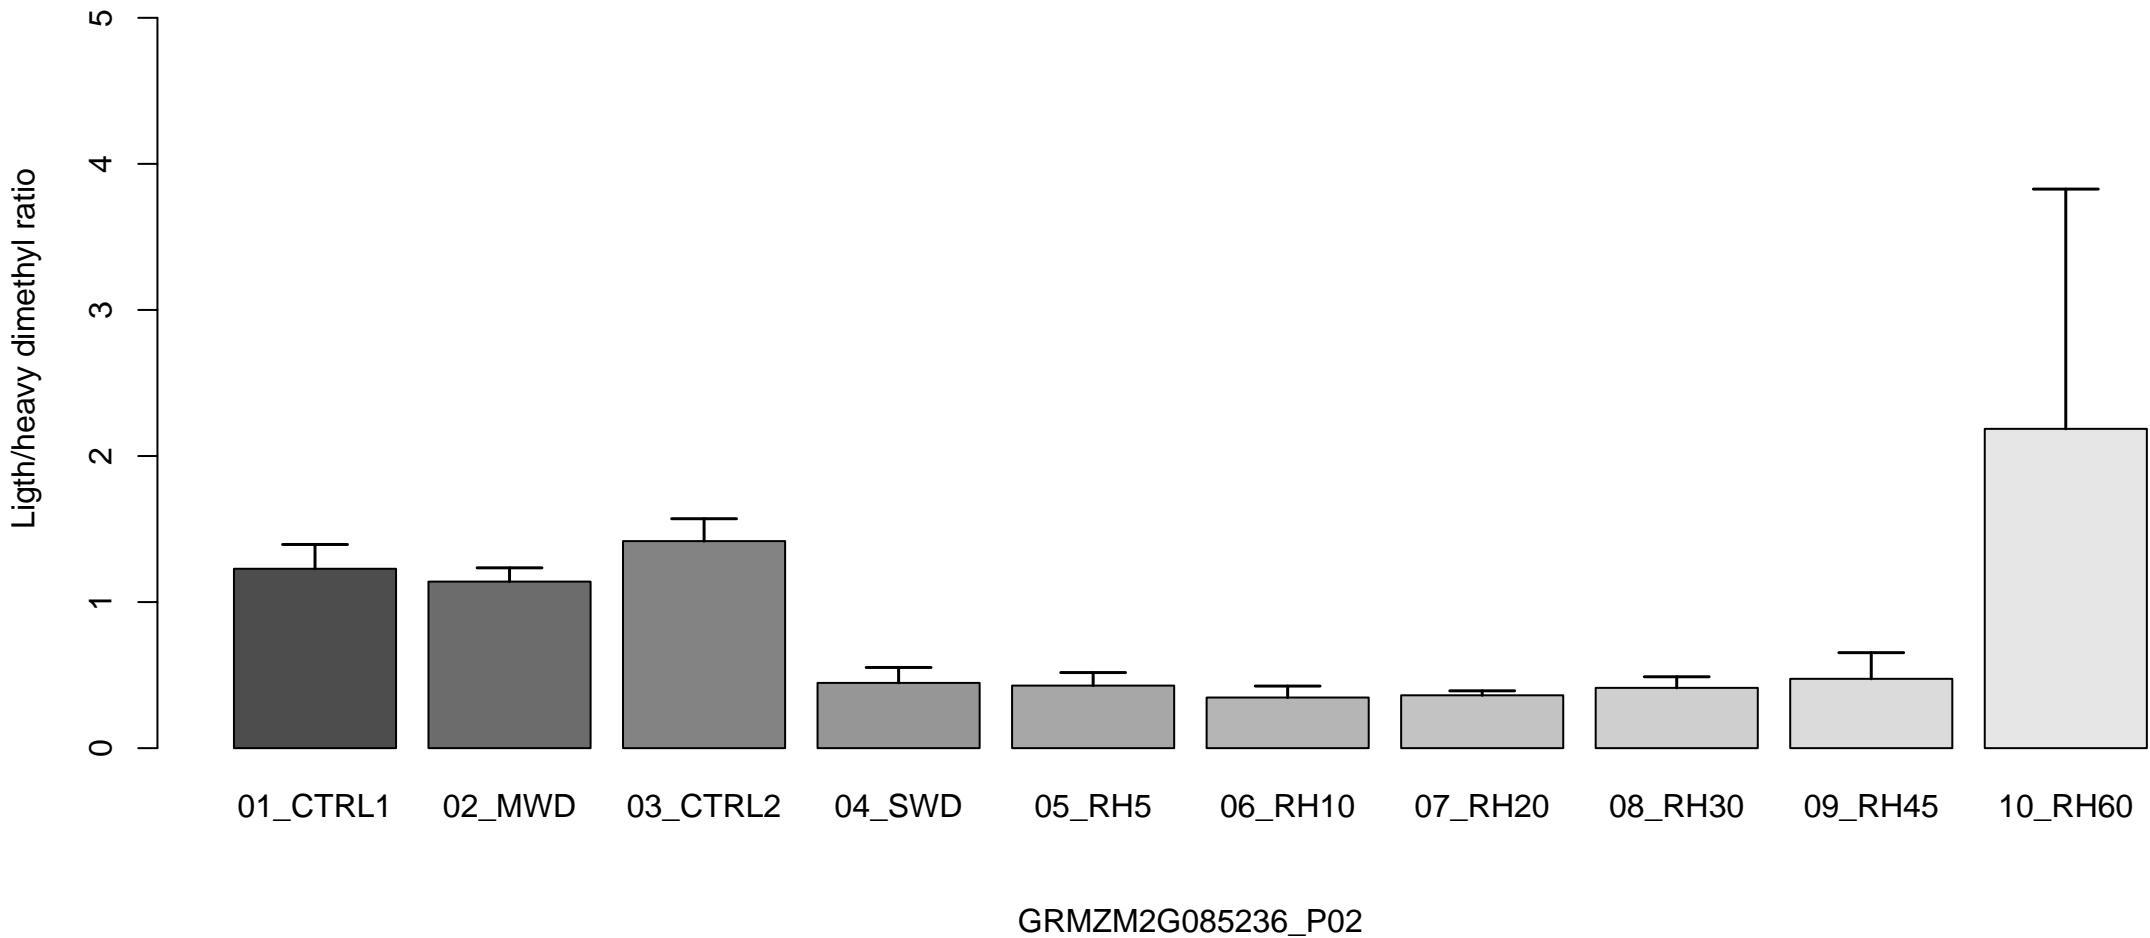

### COP1-interacting protein 7 (CIP7)-like protein # S855

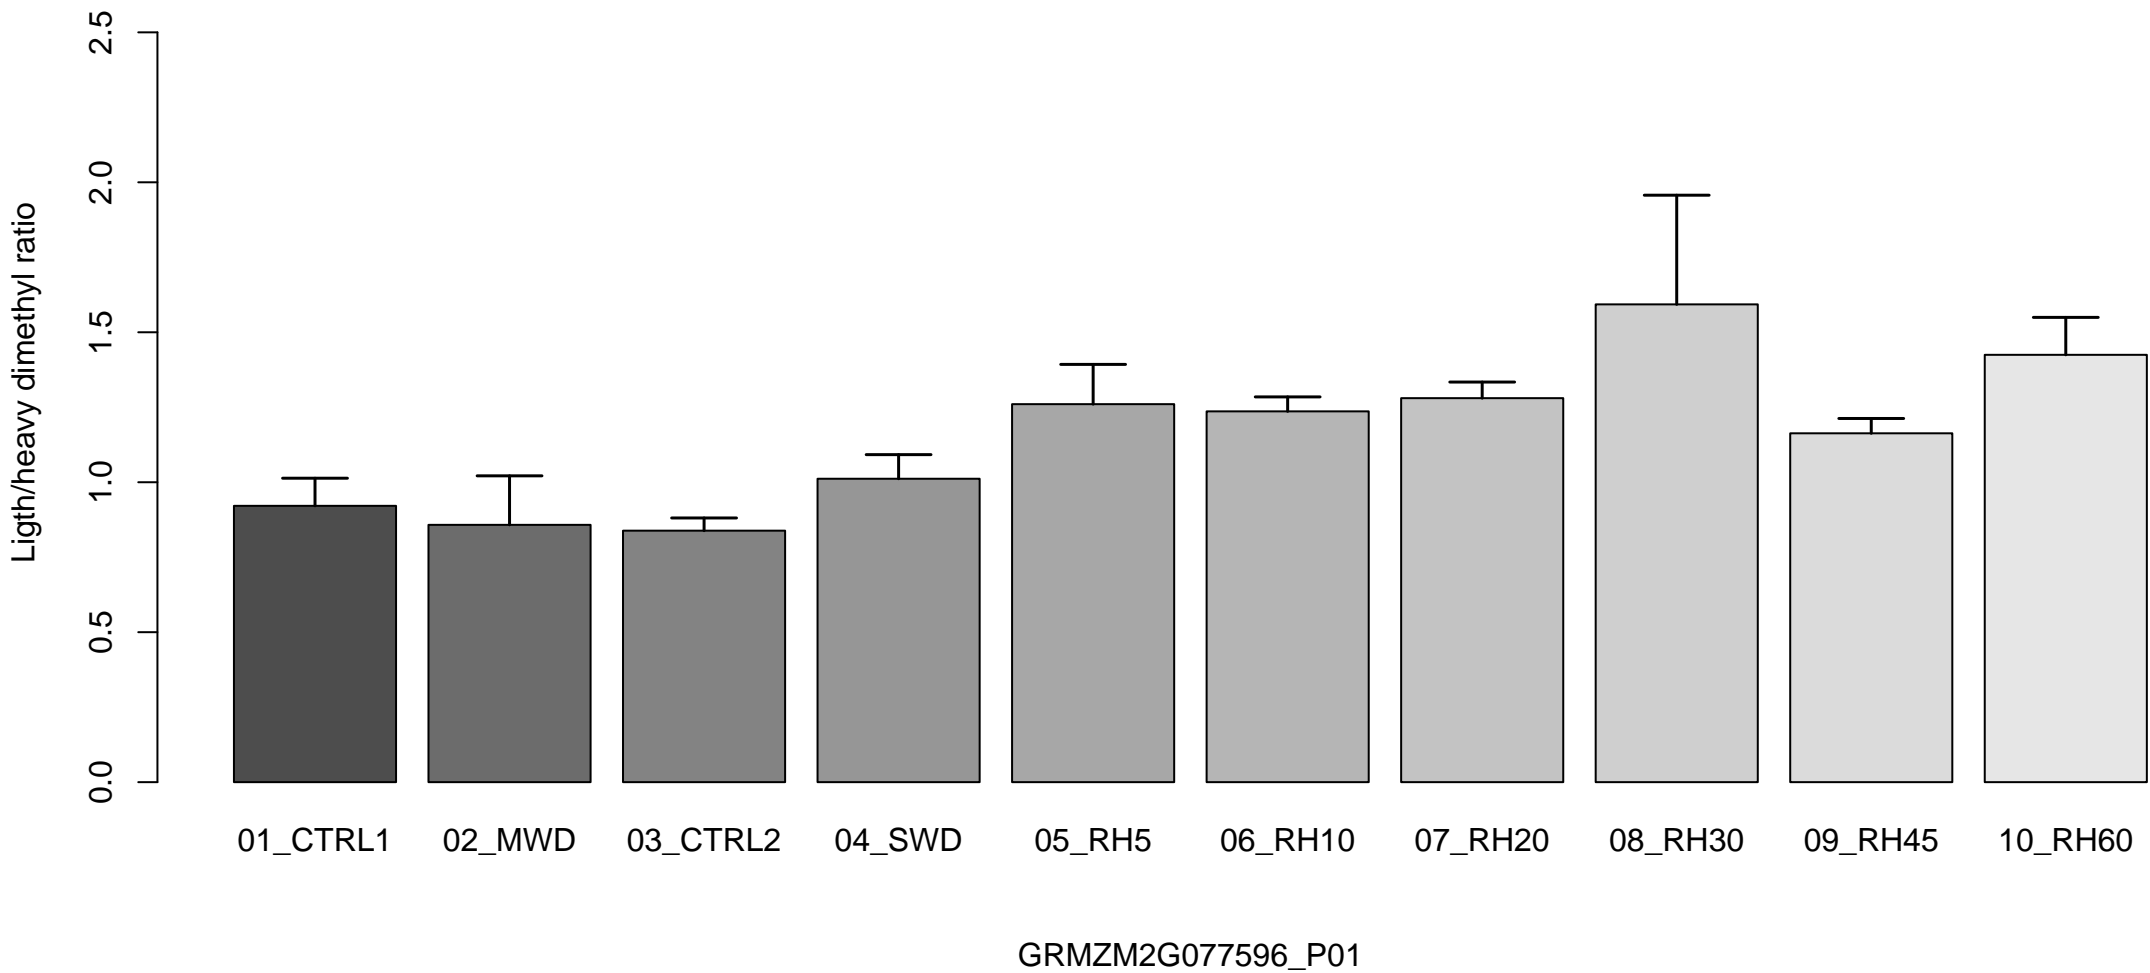



### E3 ubiquitin protein ligase upl2, Putative # S1747

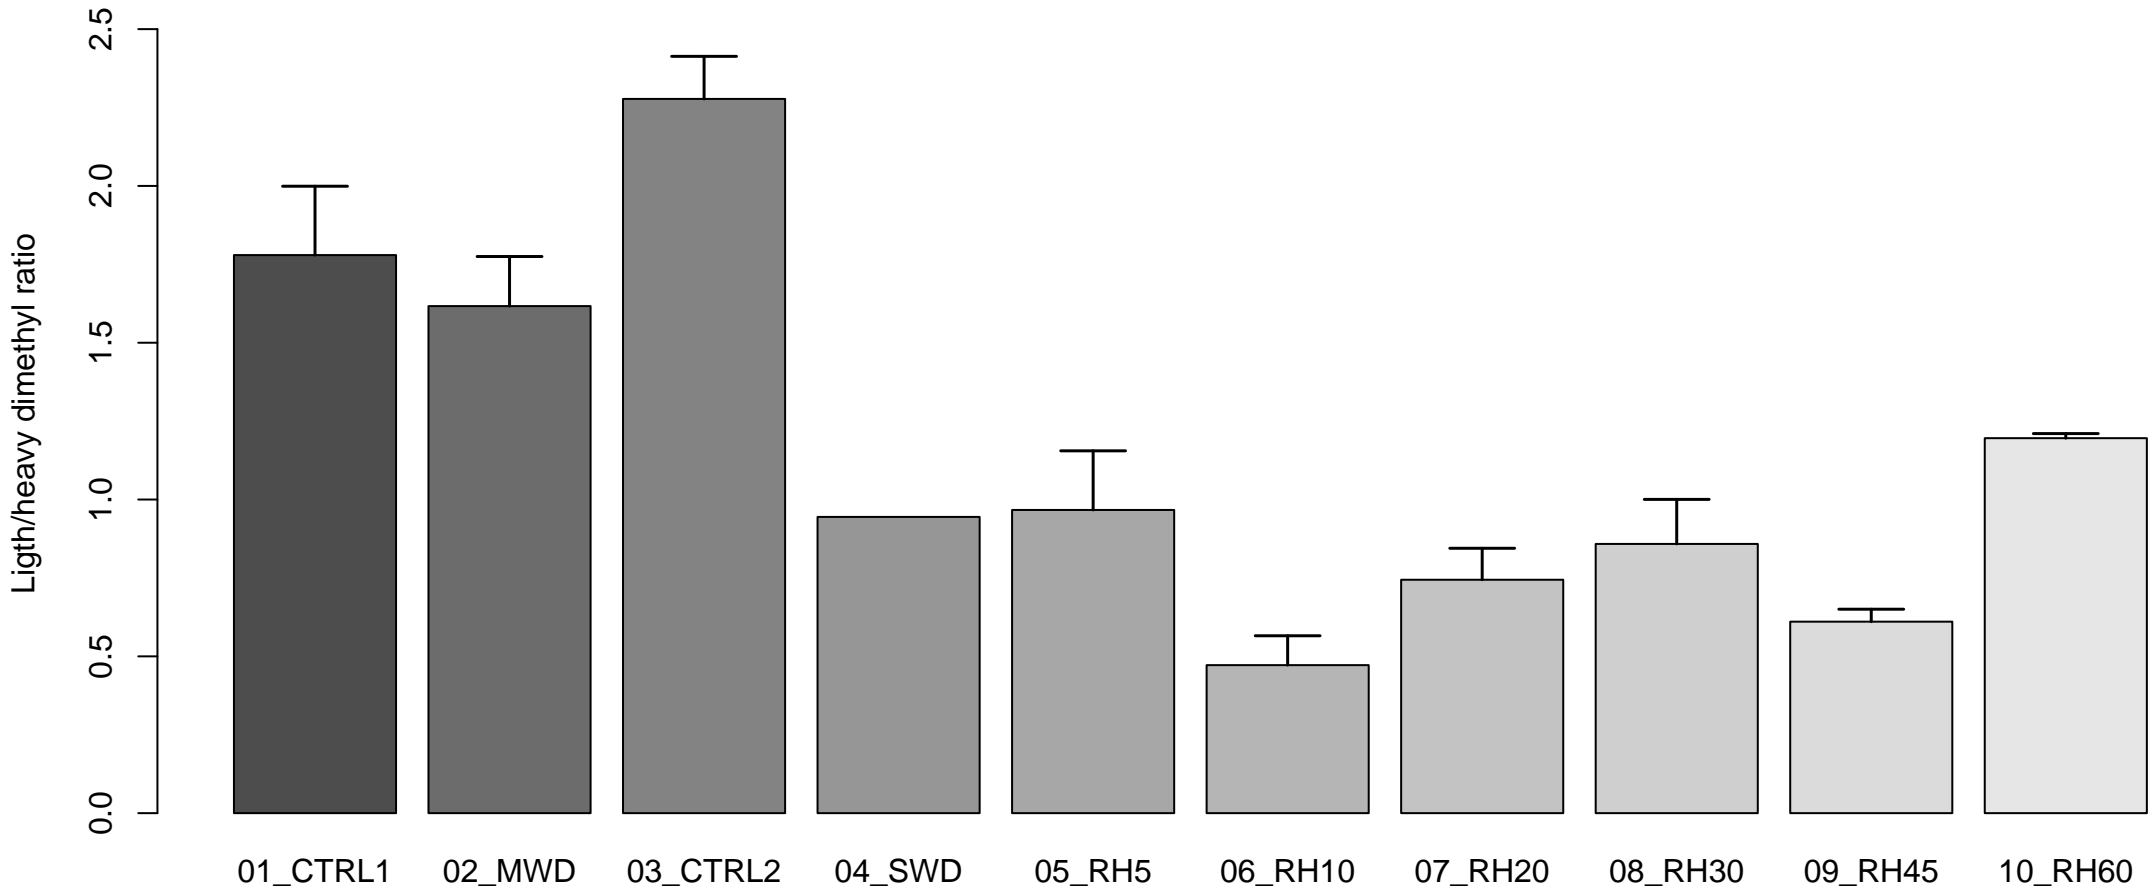

GRMZM2G331368\_P02

# Kinesin heavy chain # T952

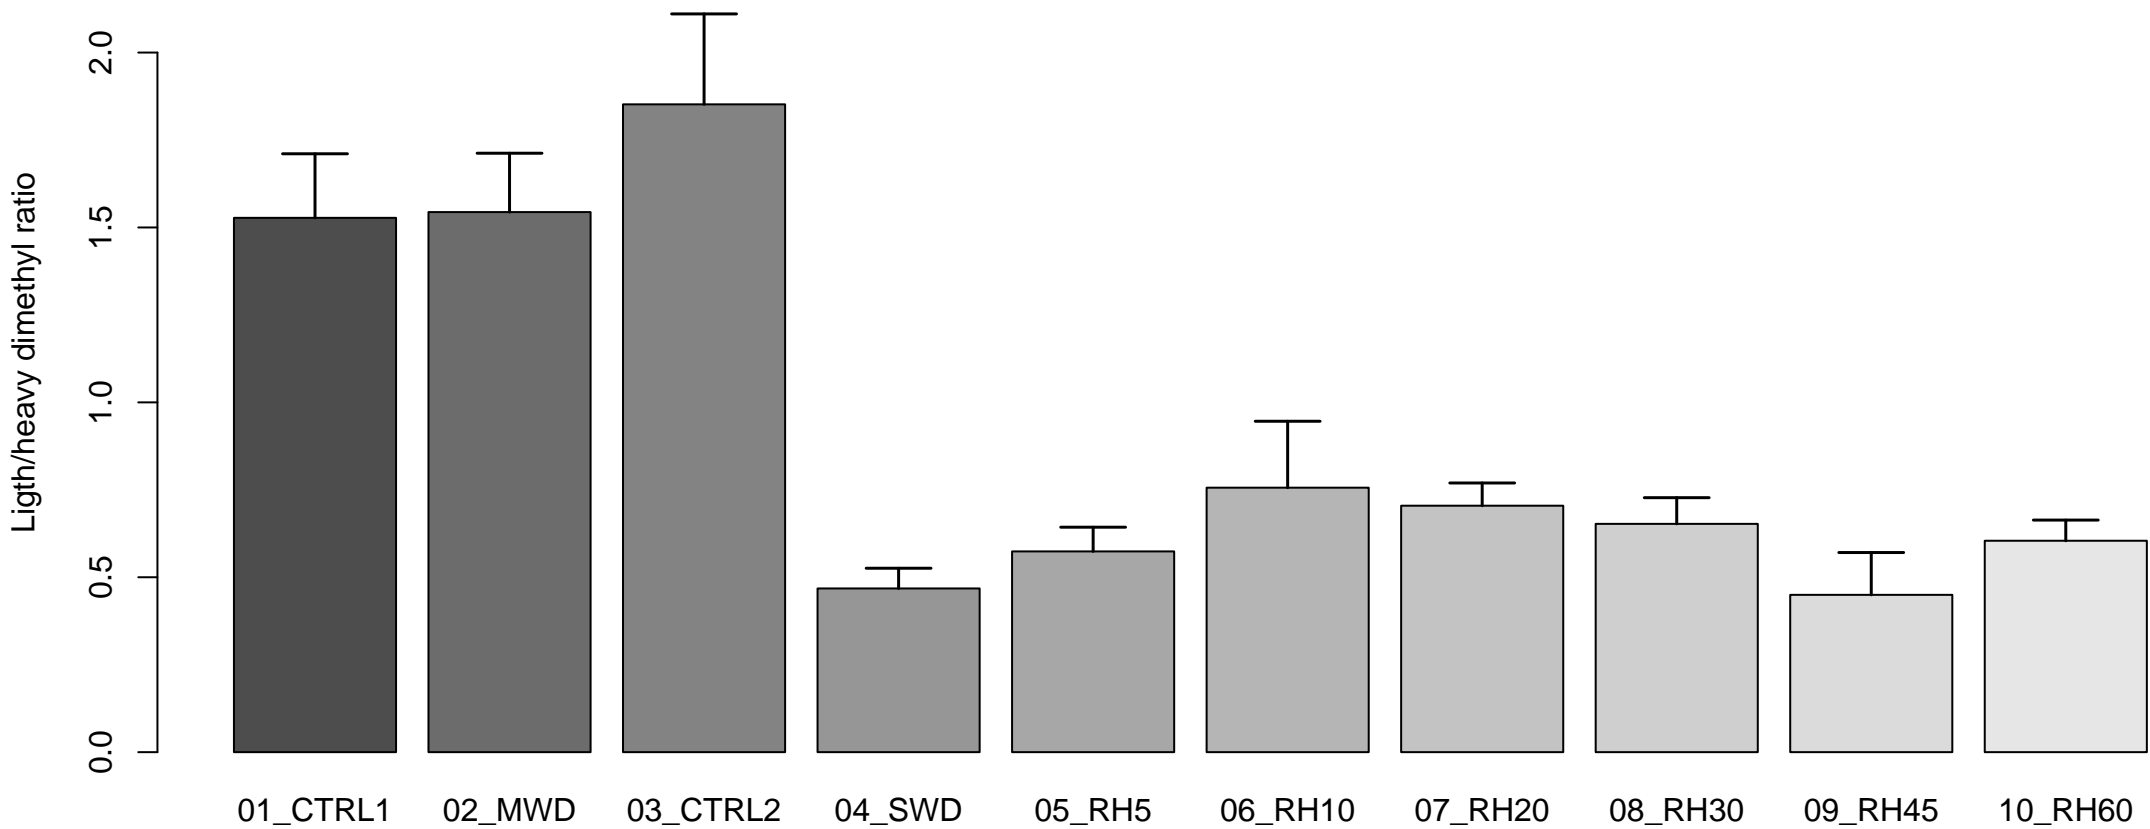

GRMZM2G320689\_P04

### Proteasome inhibitor-like protein # S178

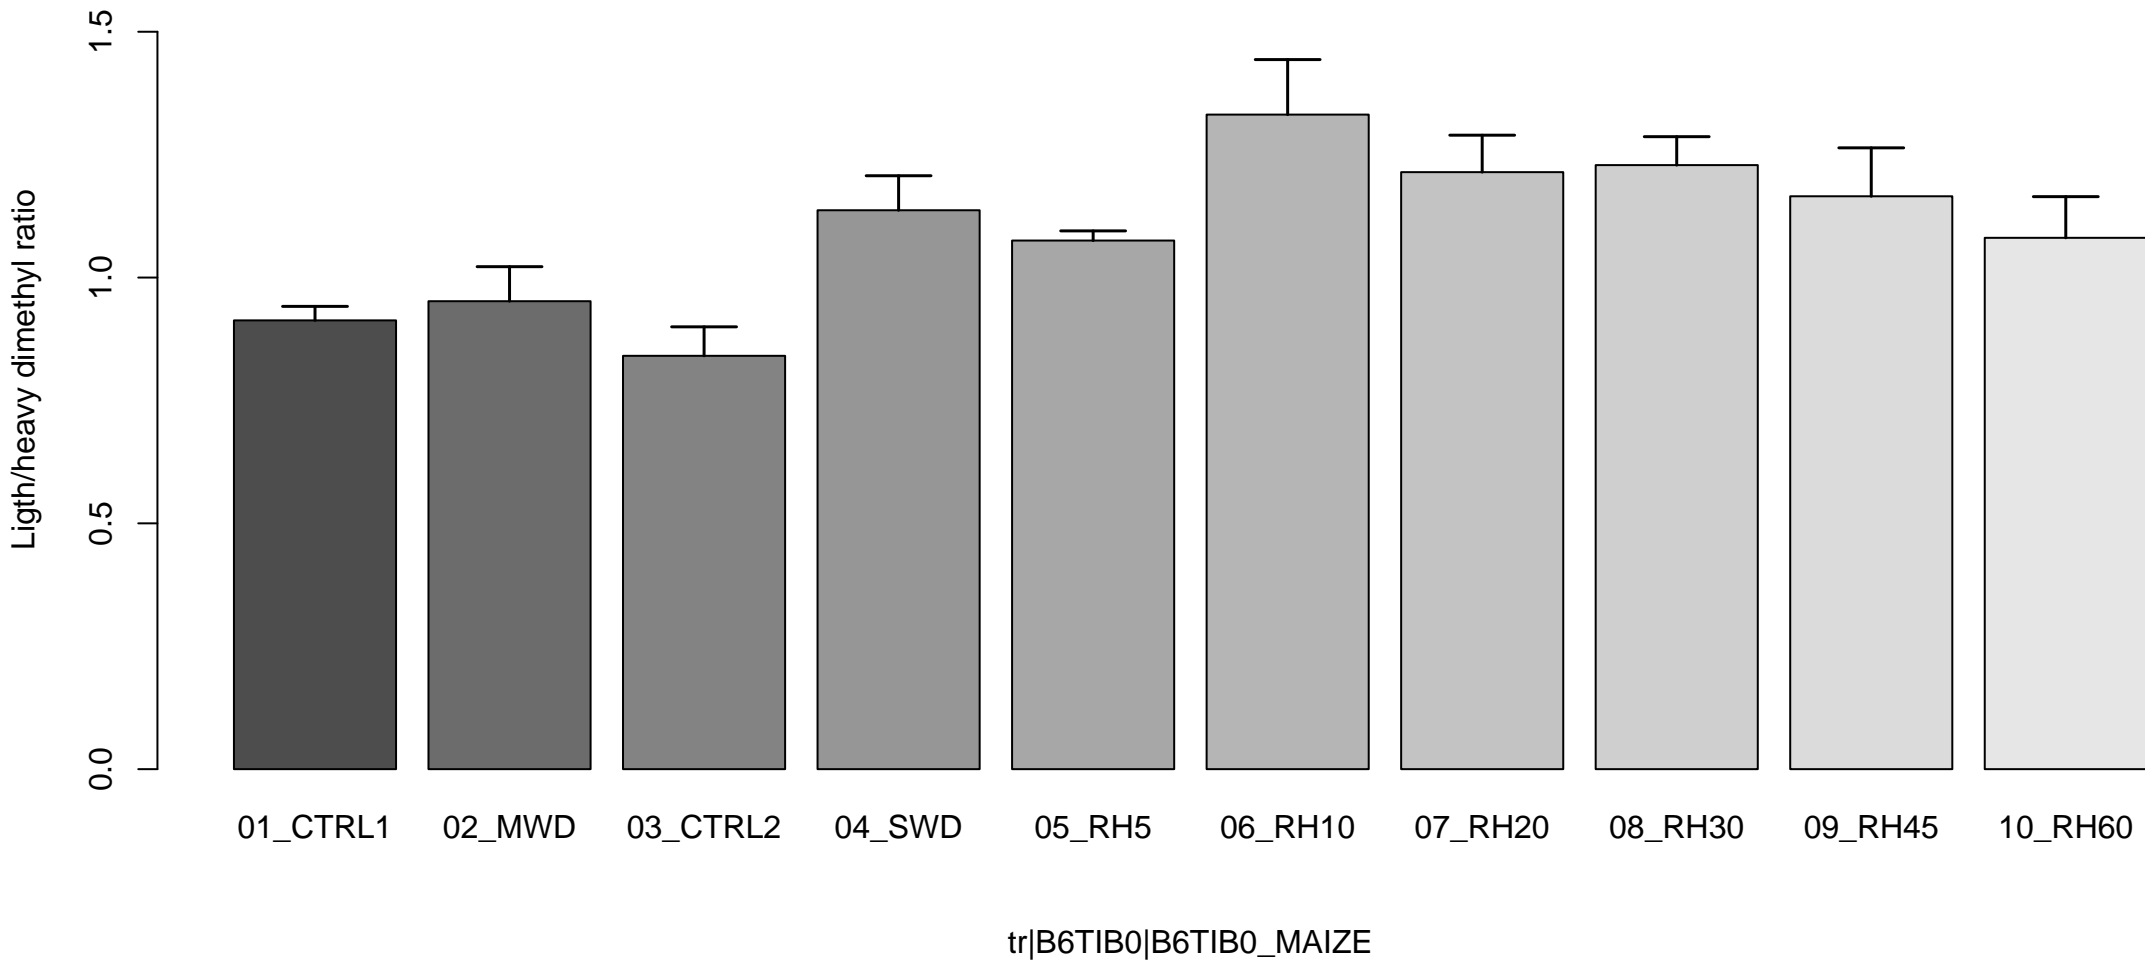

### Receptor-like kinase RHG1 # S753

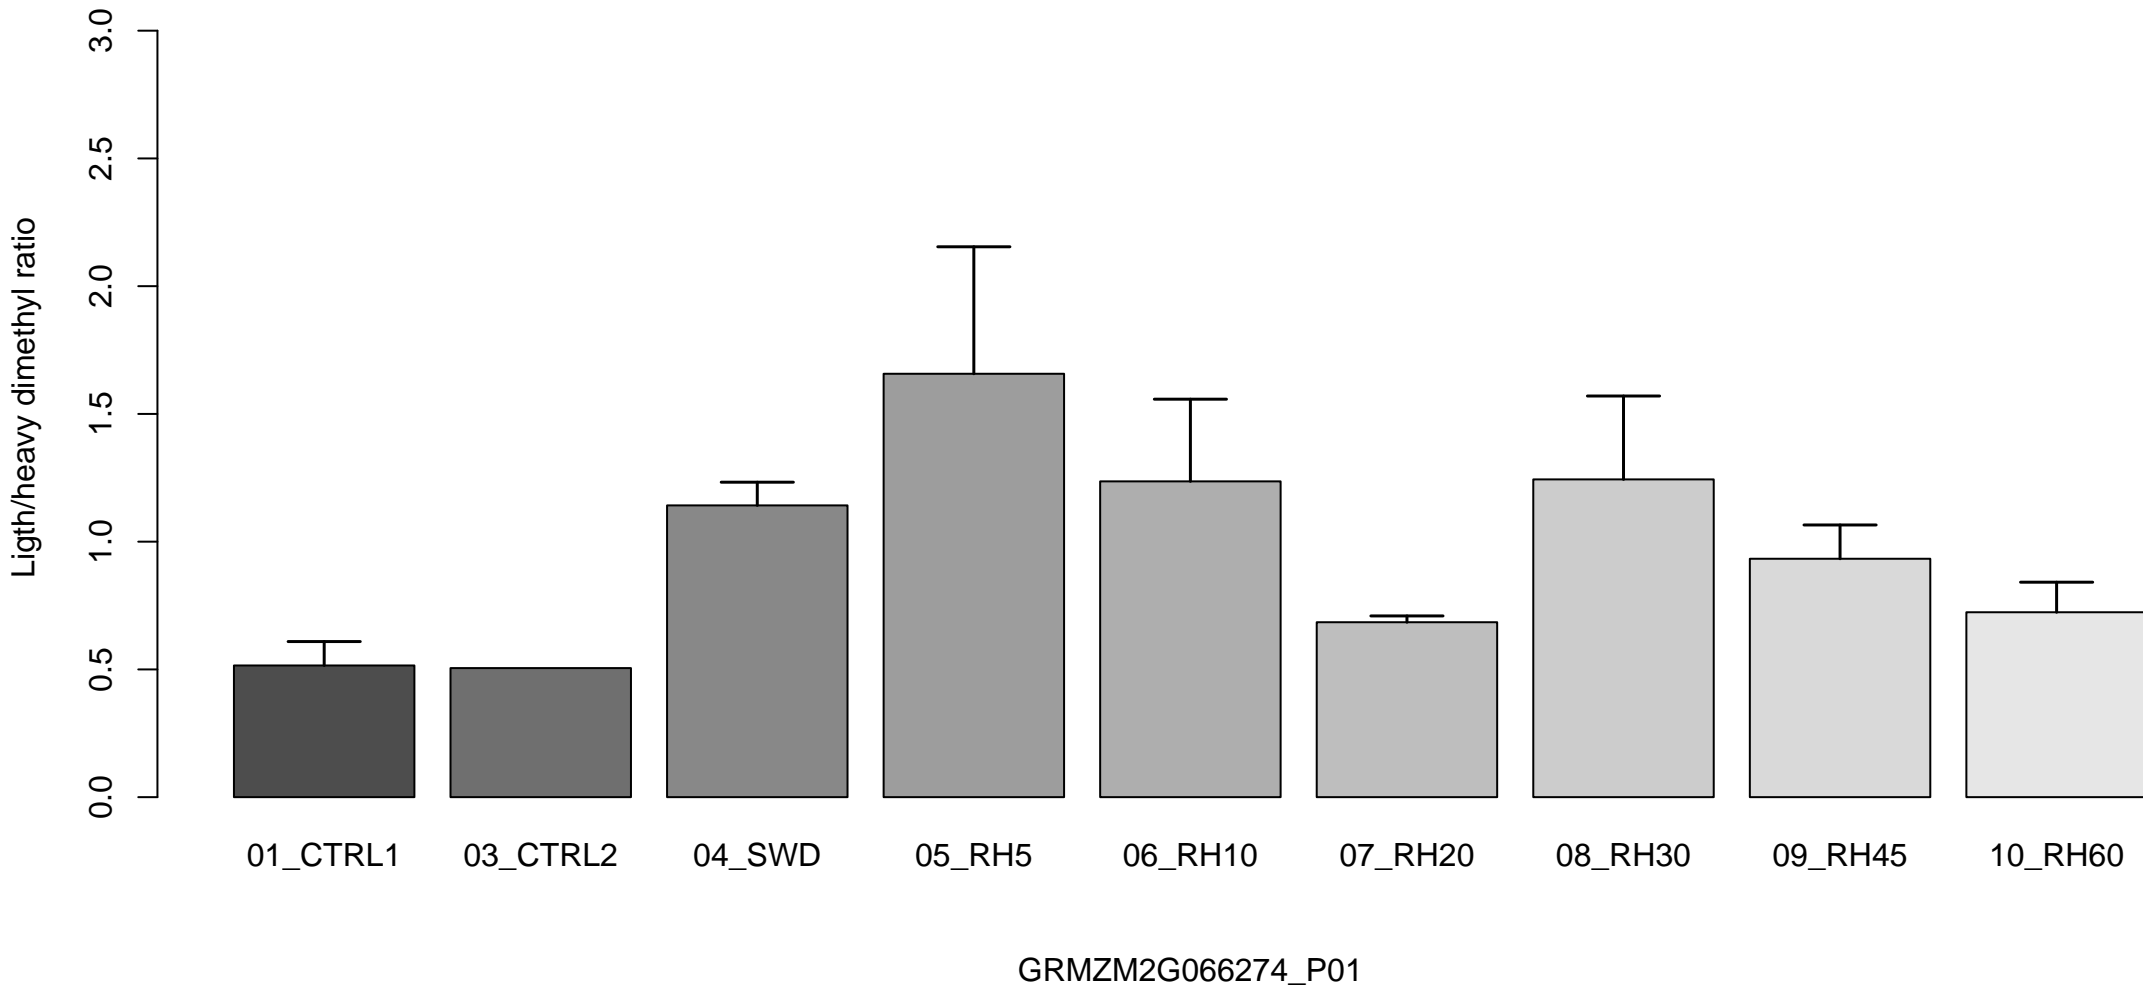

### Putative uncharacterized protein # S190

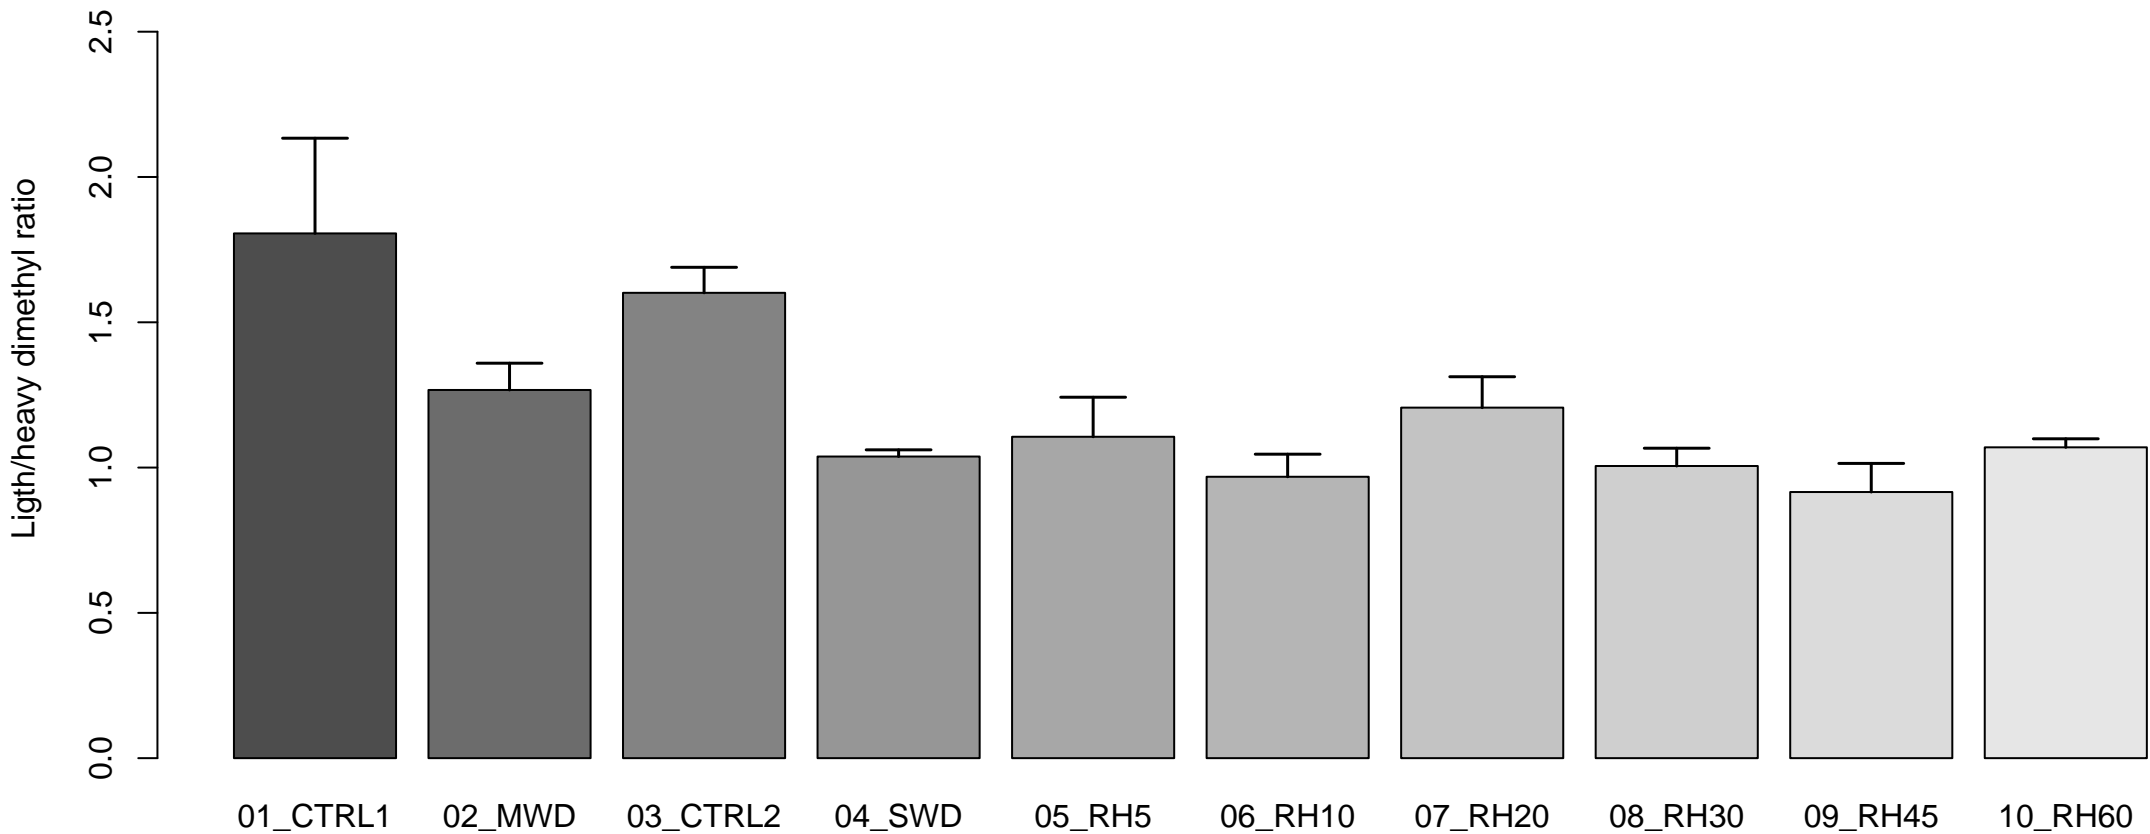

GRMZM2G024811\_P02

# Putative nucleic acid binding protein # S91

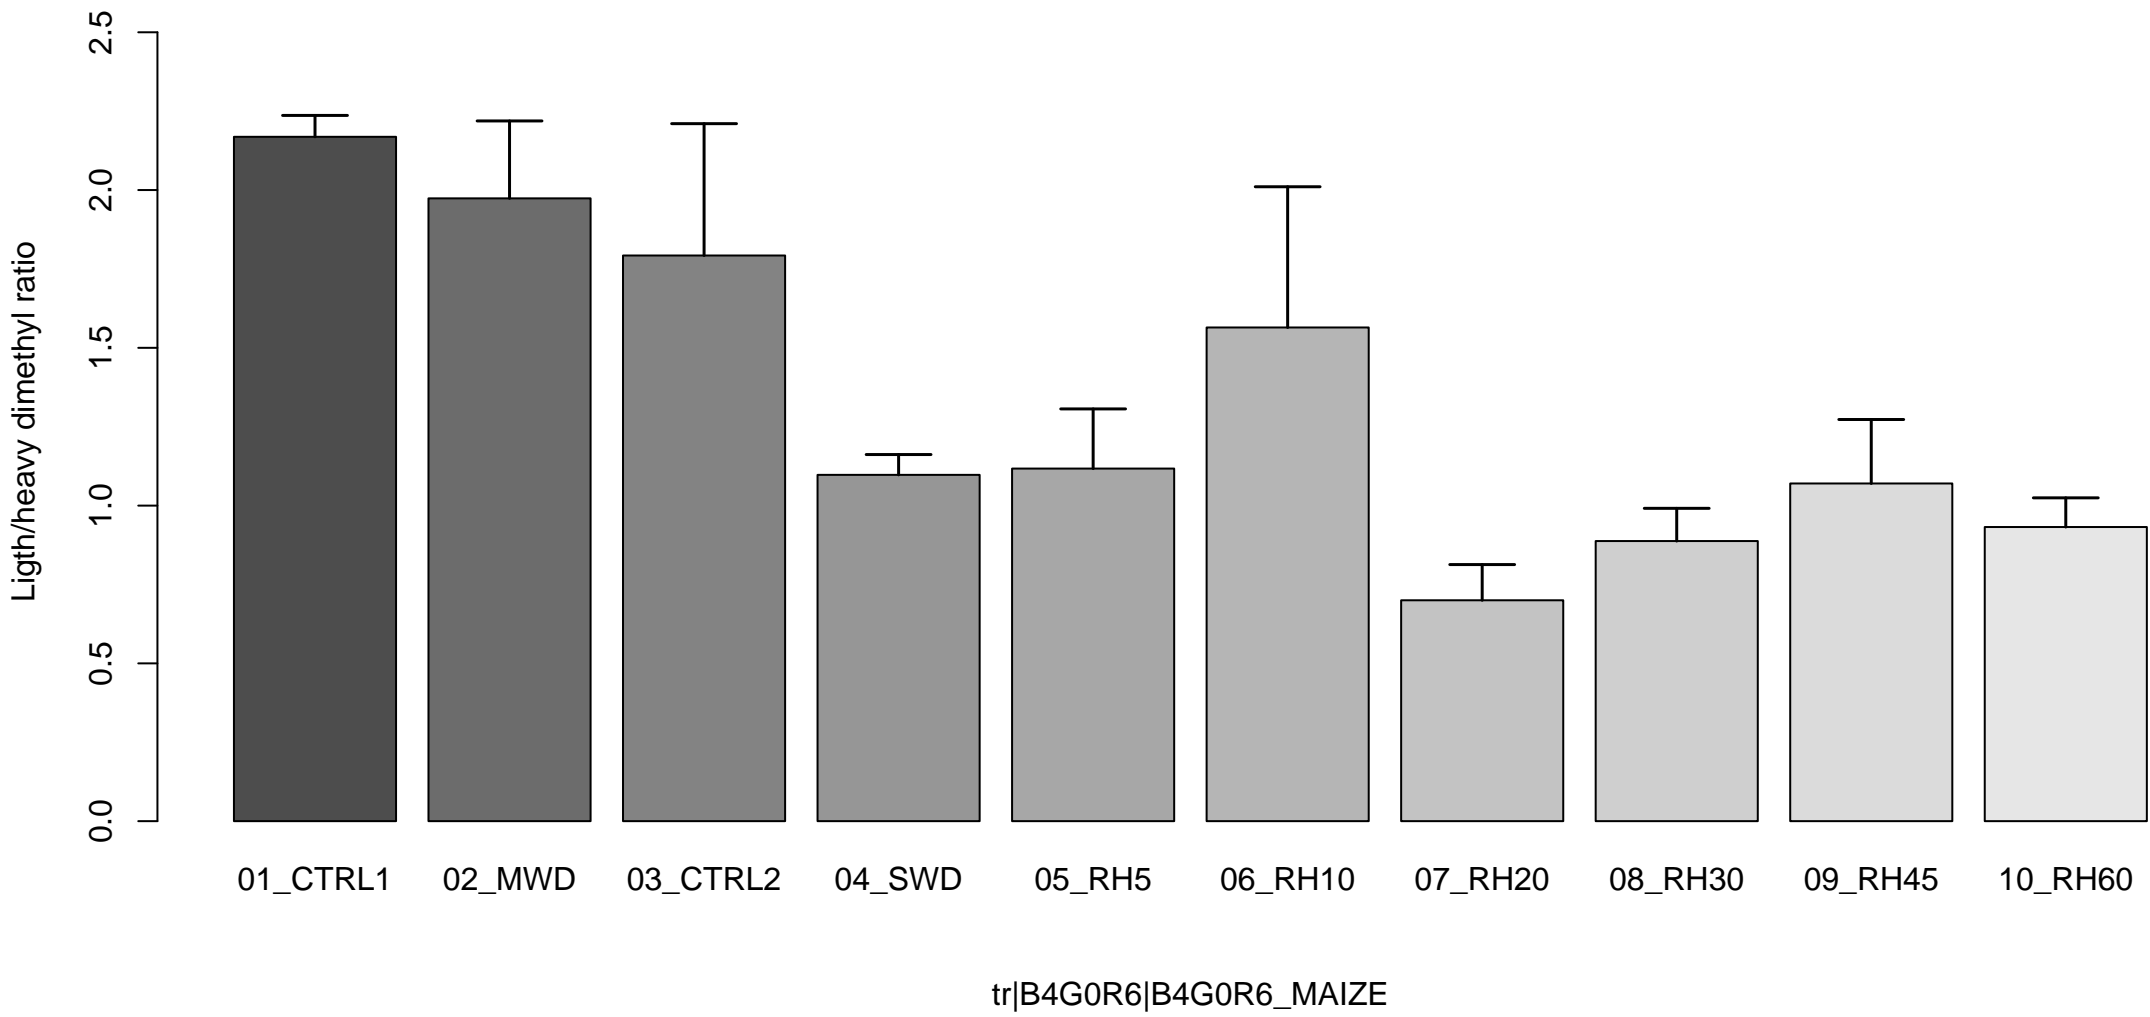

### Putative uncharacterized protein # S326

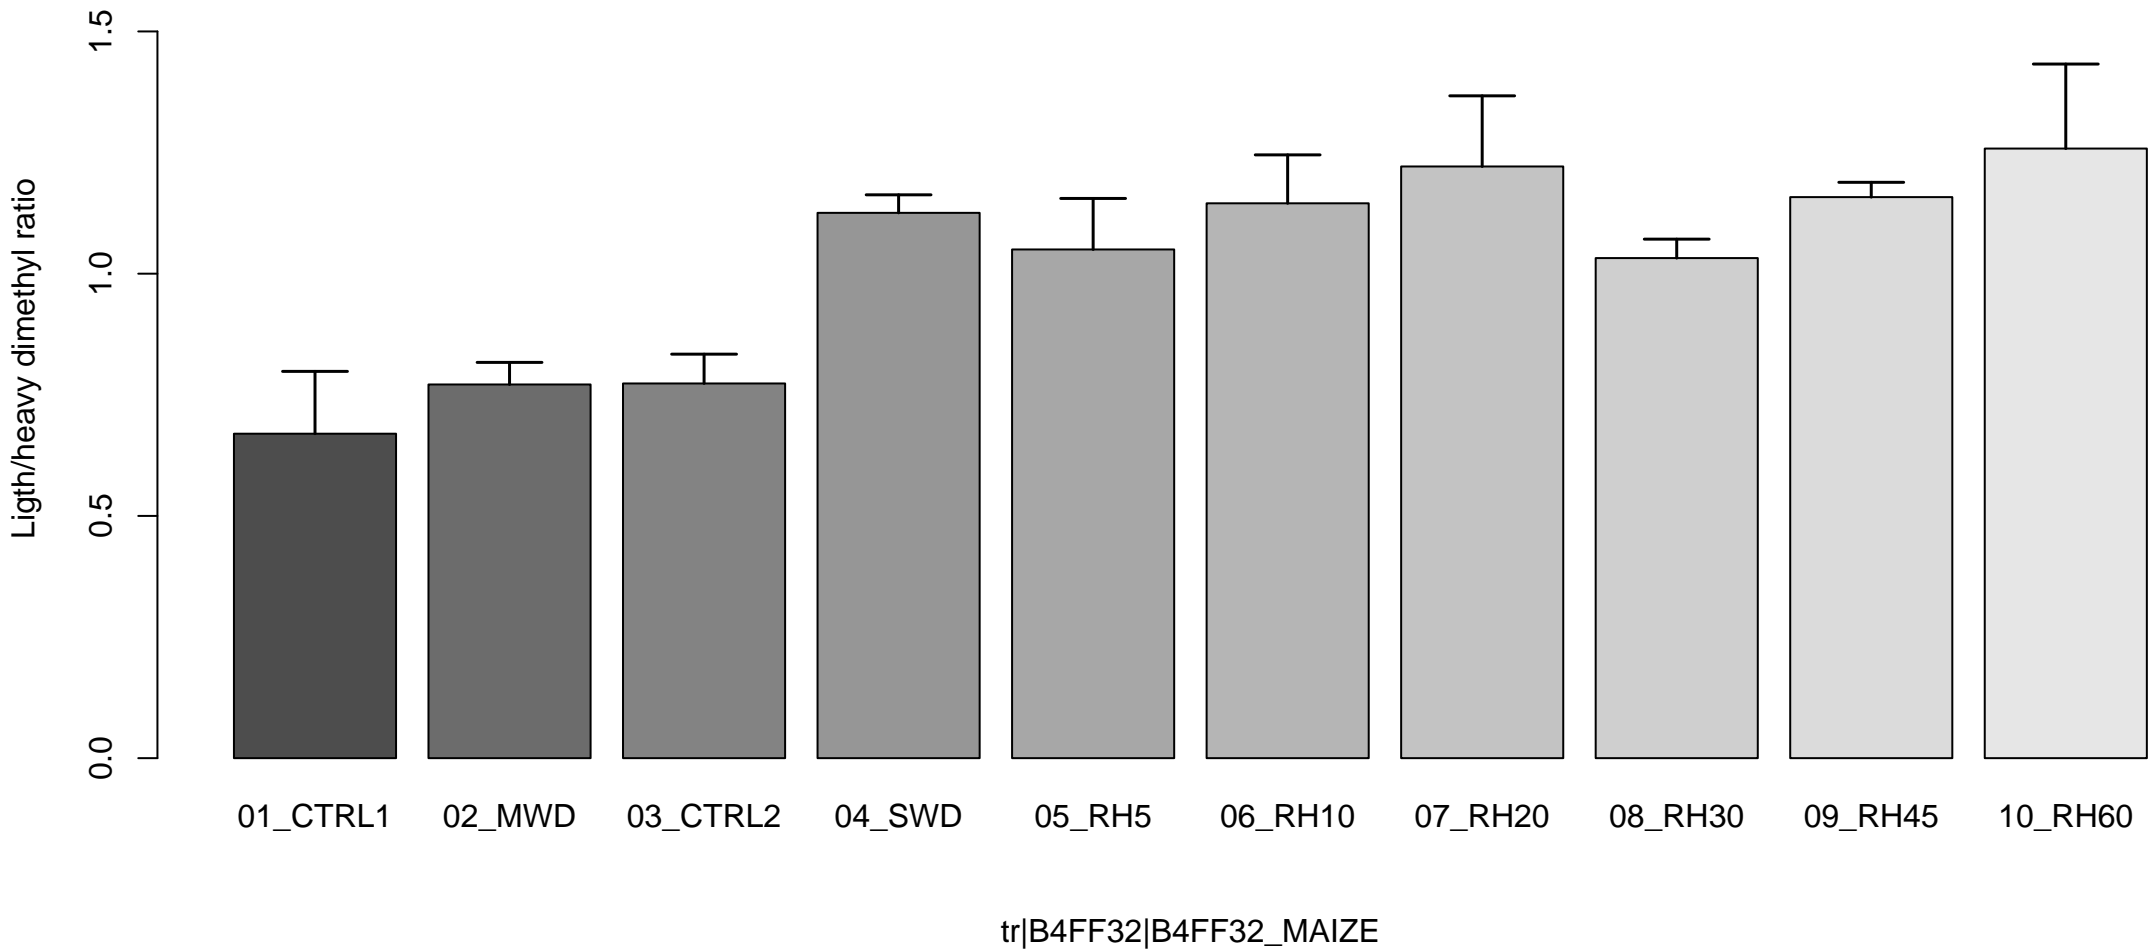

### Transcription factor HY5 # S43

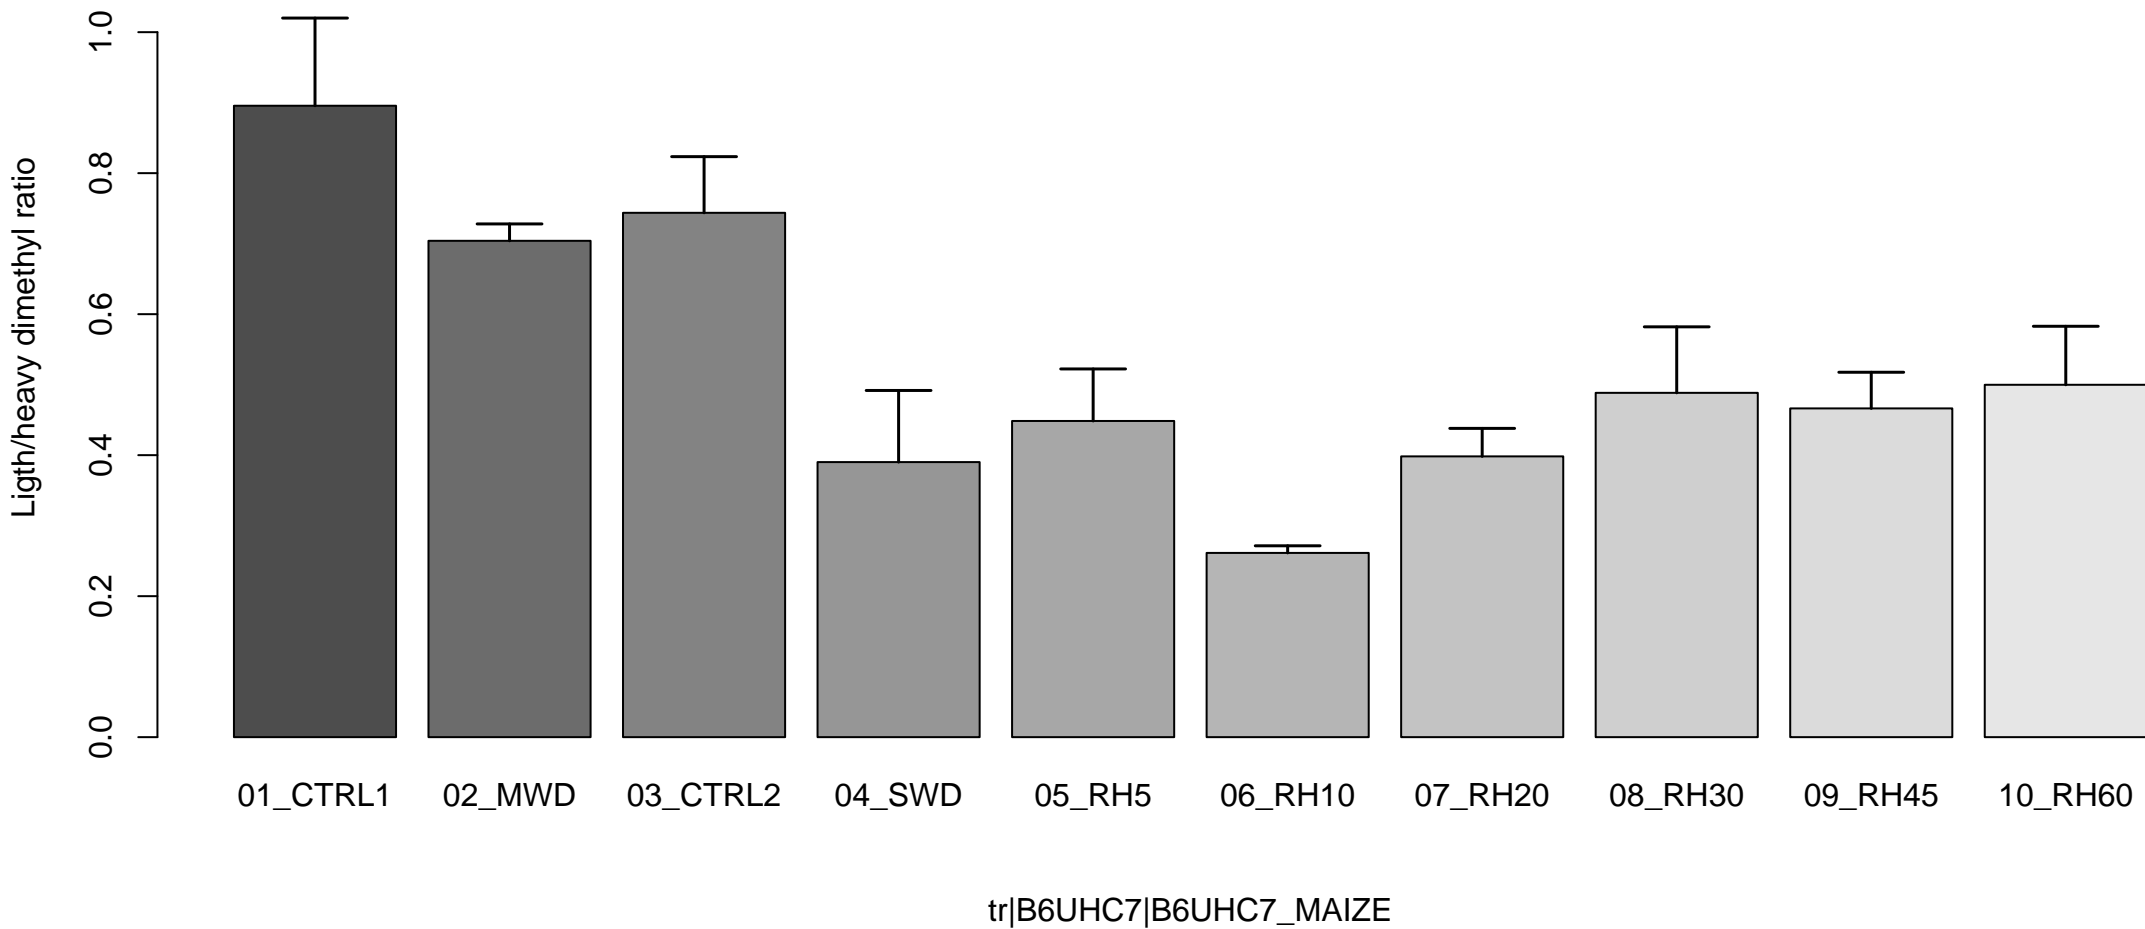



### Photosystem II reaction center protein H # S9/S10

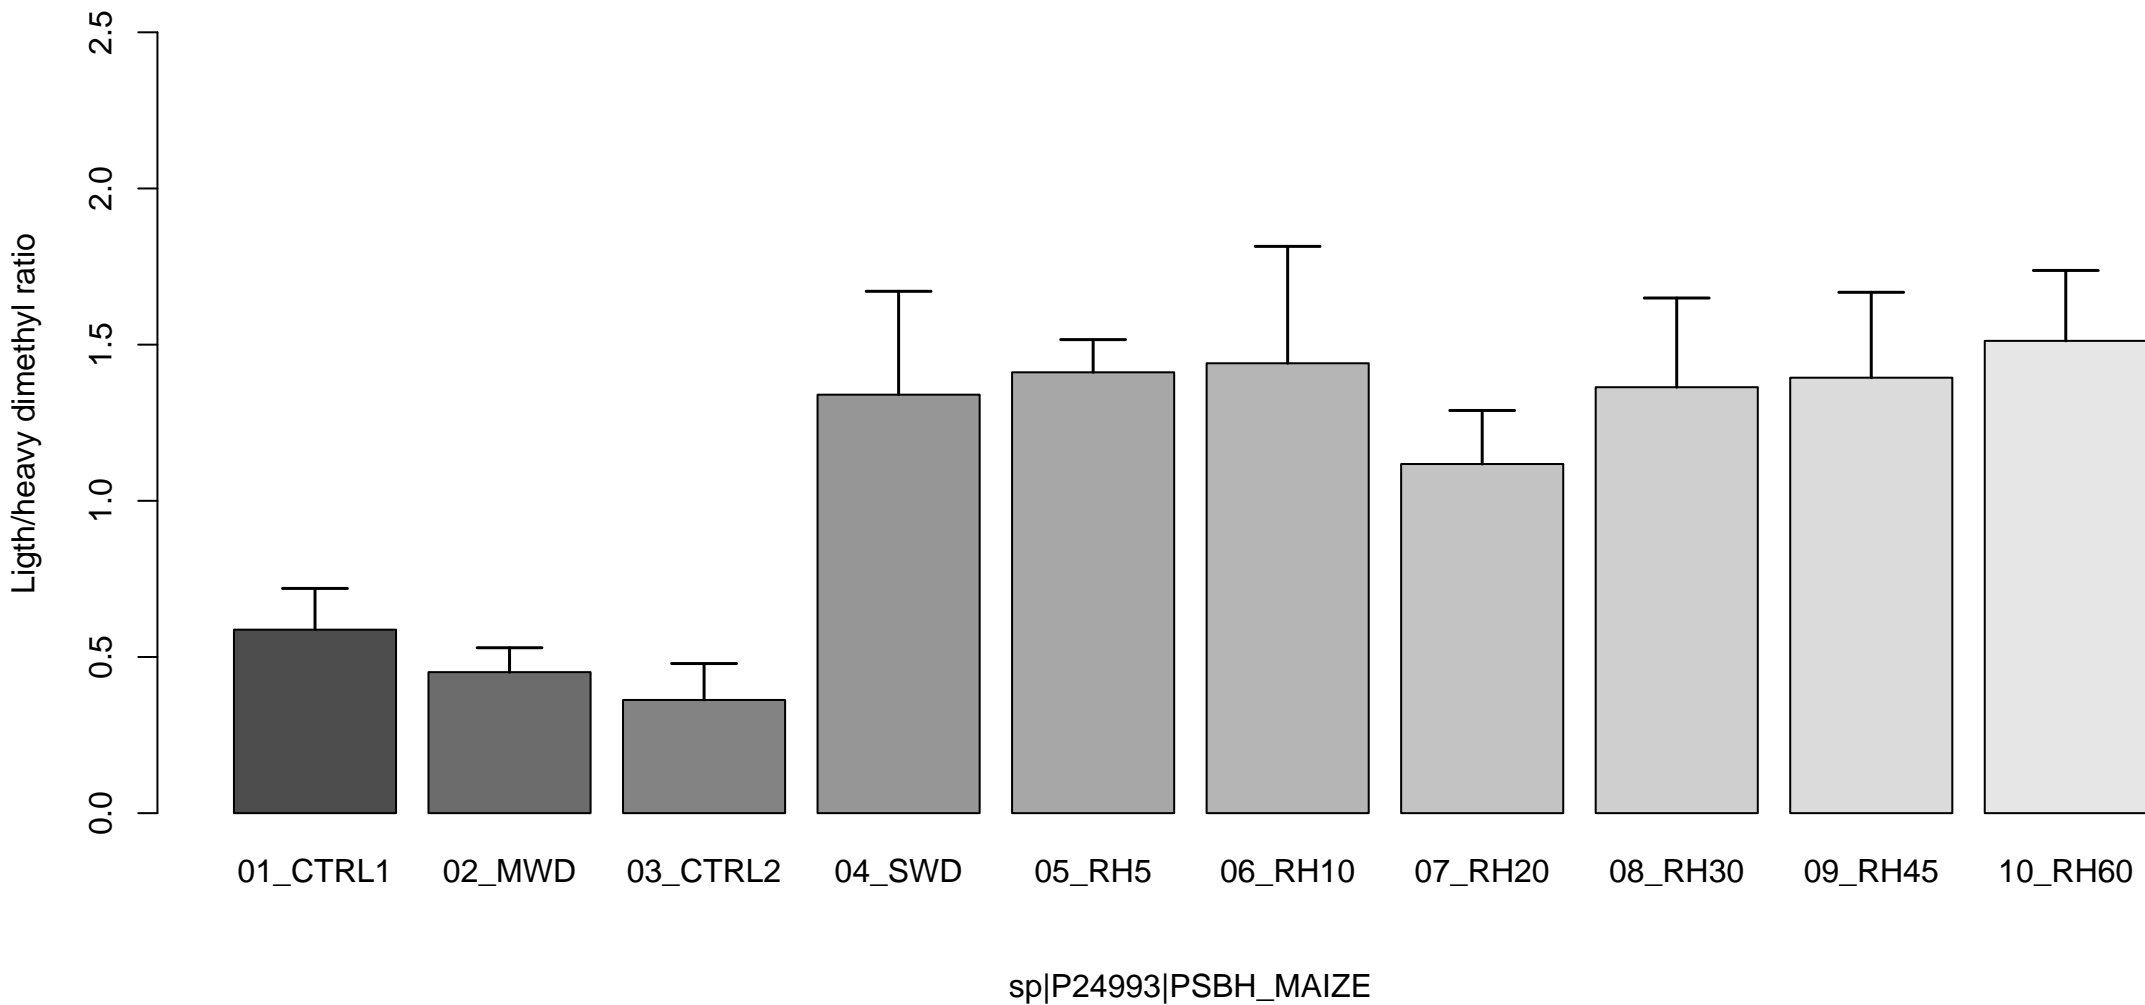

### Bromodomain-containing protein, putative # S124

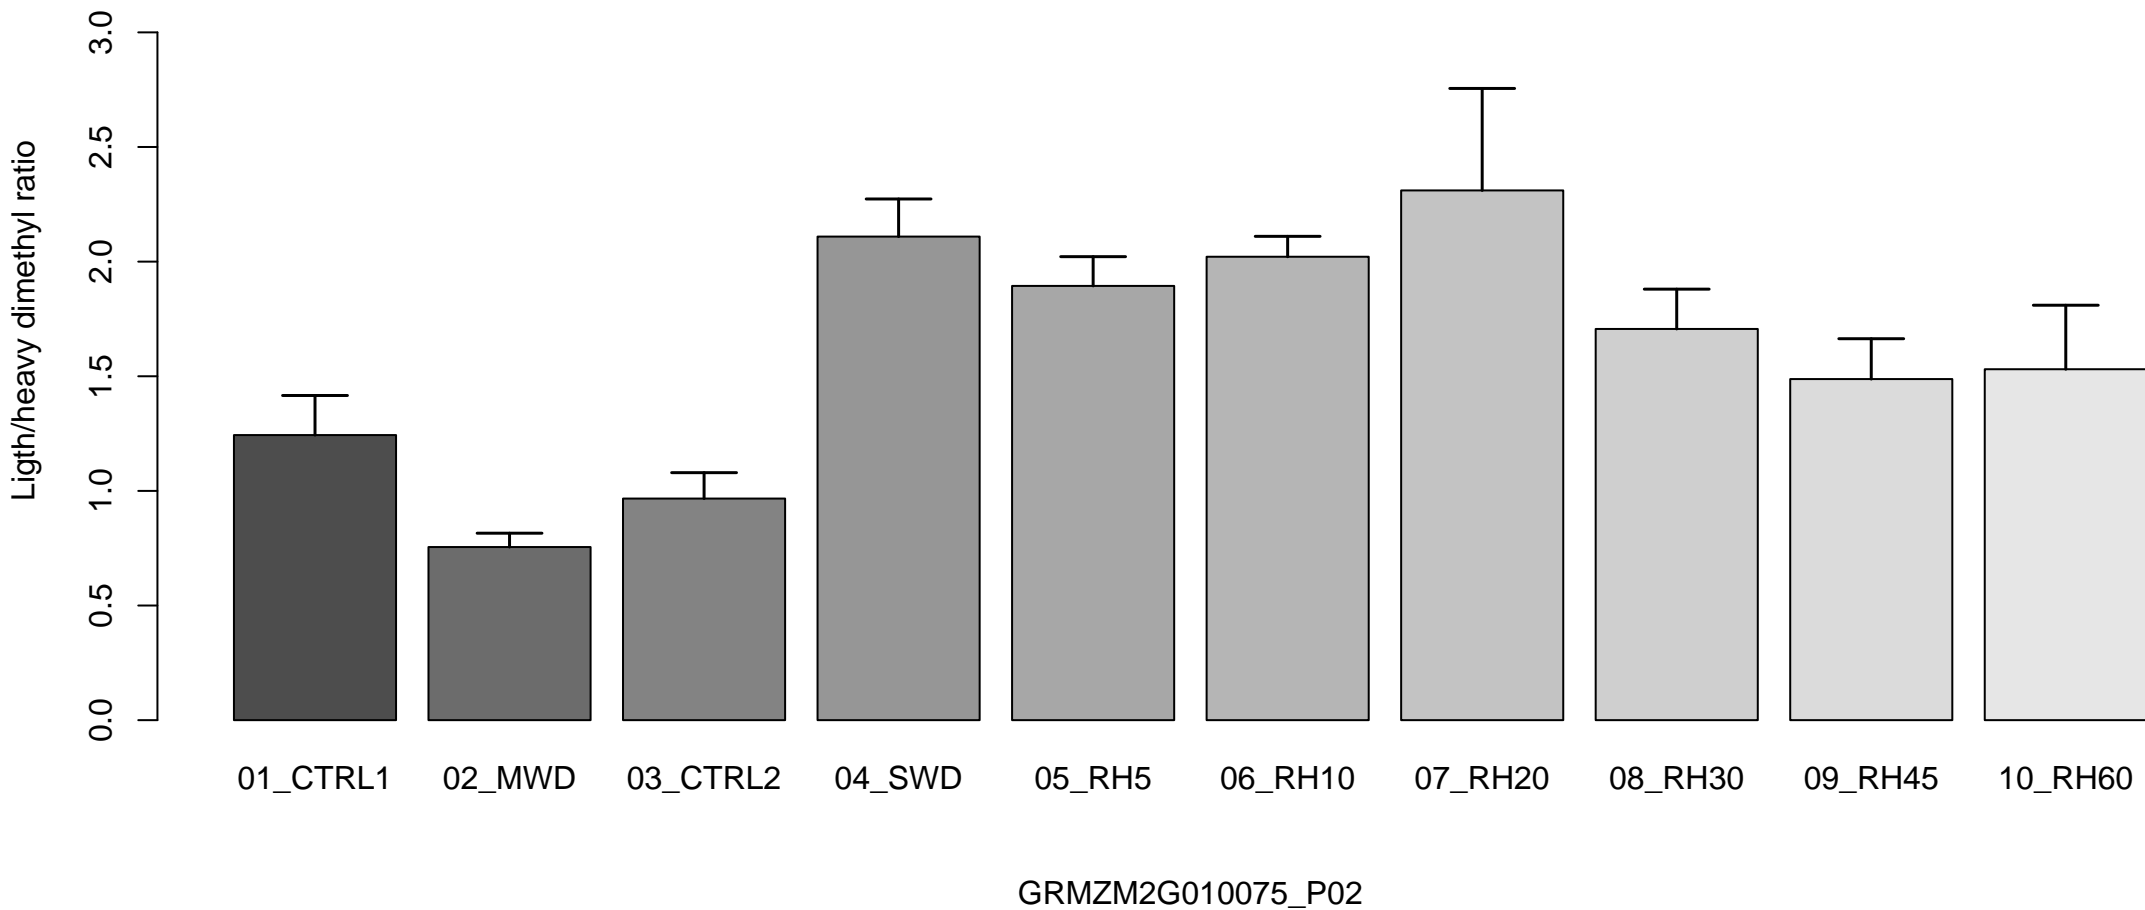

### Histone deacetylase HDT2 # S105

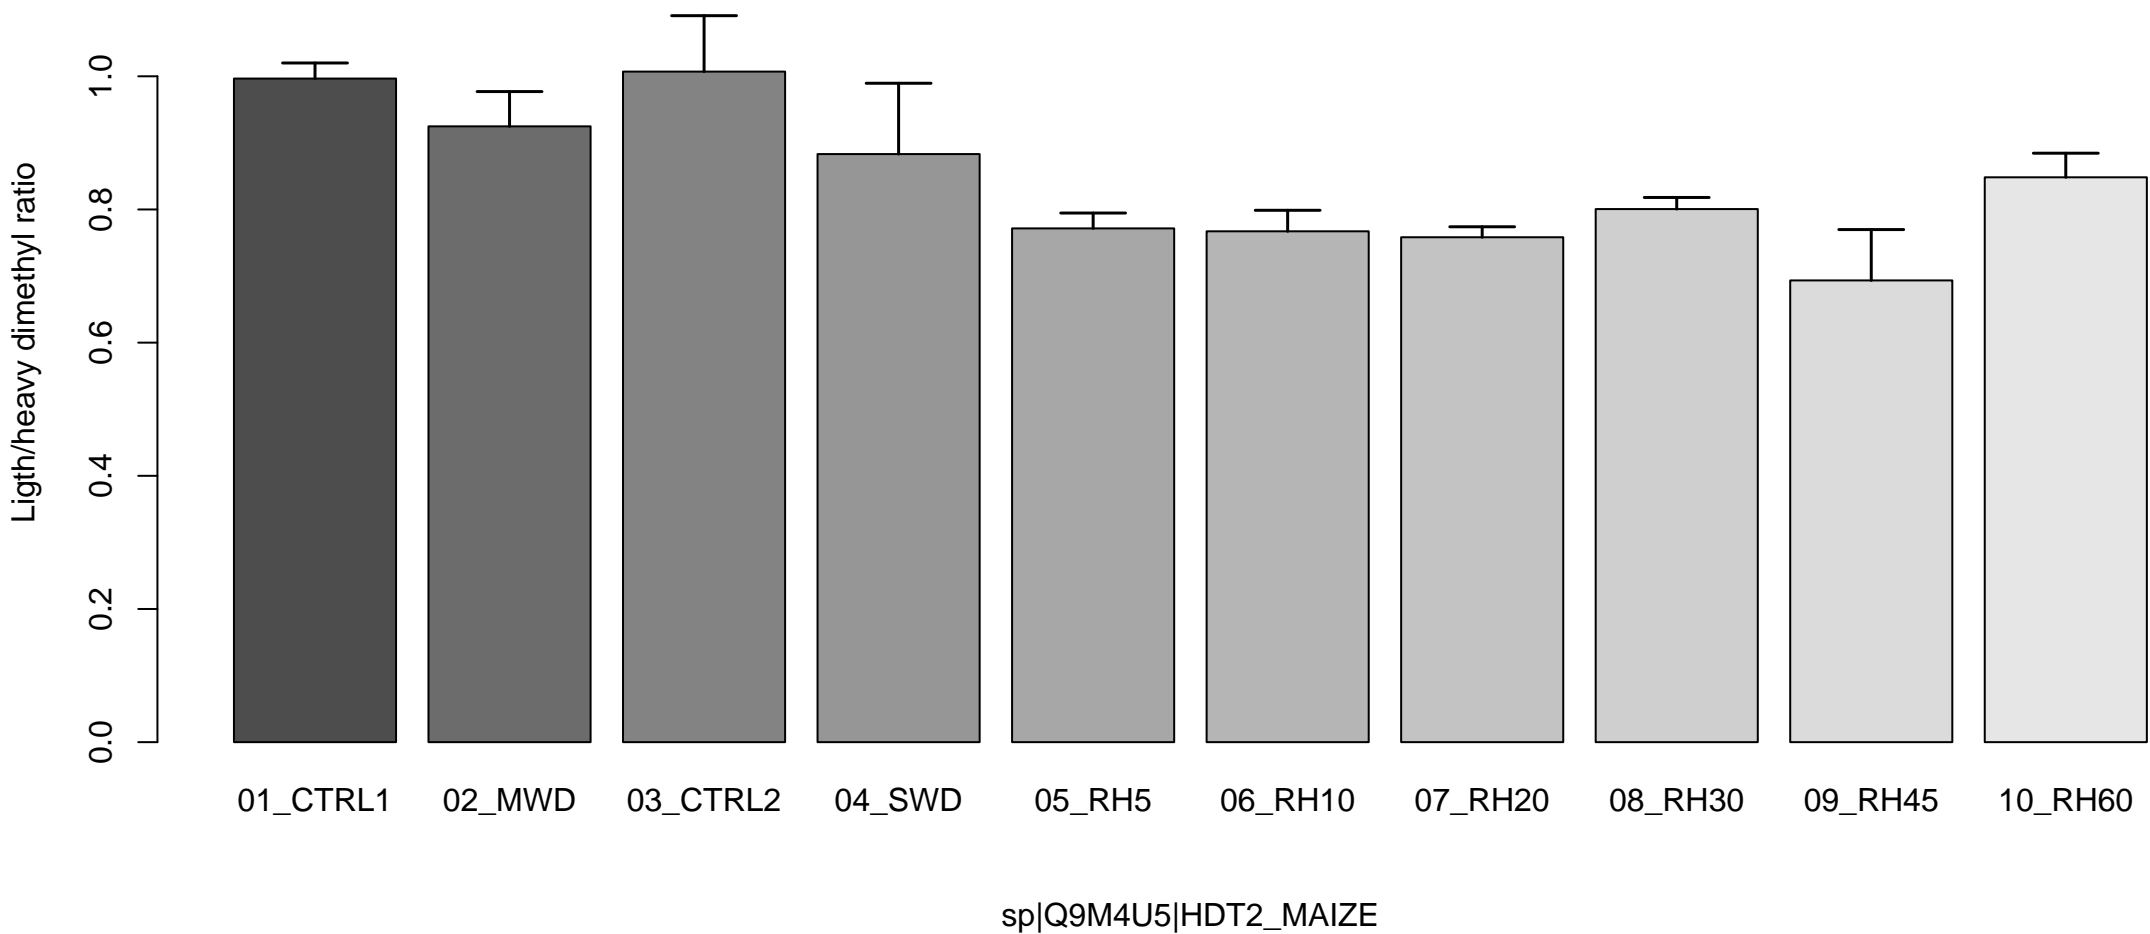

### Putative uncharacterized protein # S167

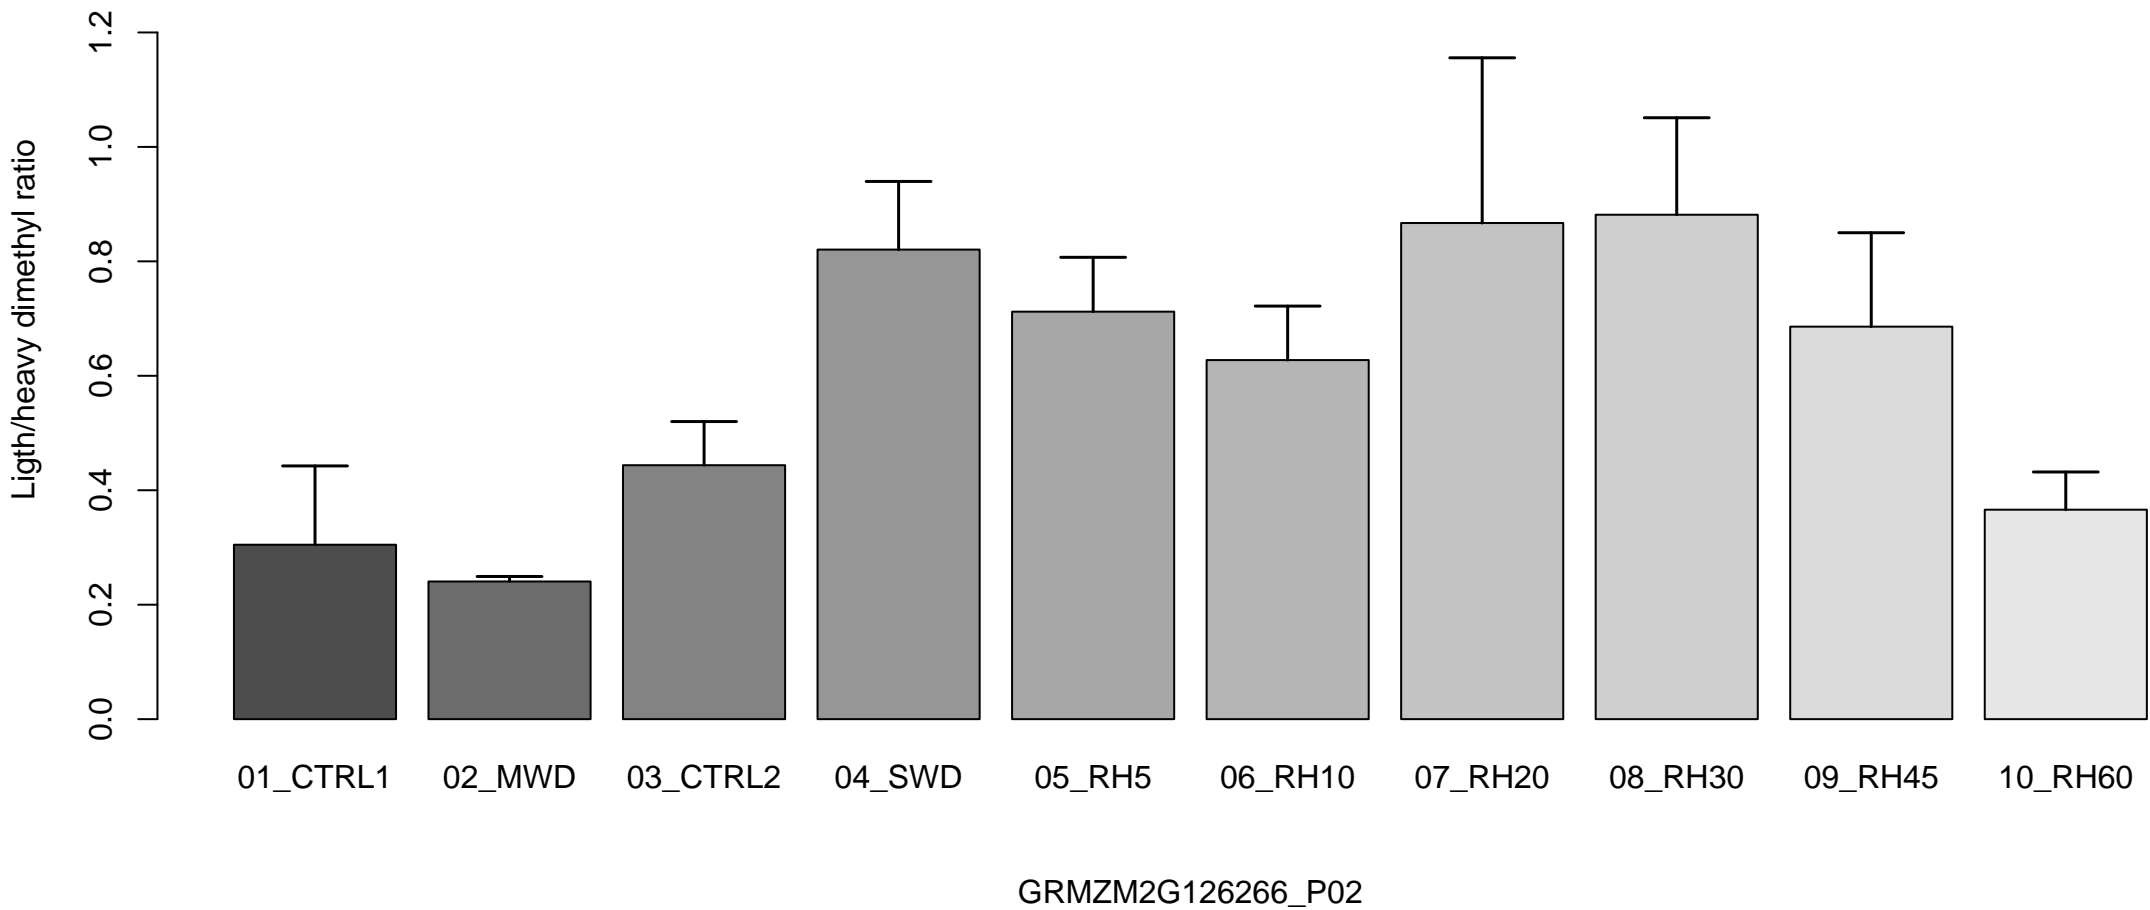

### Plus-3 domain containing protein, expressed # S373

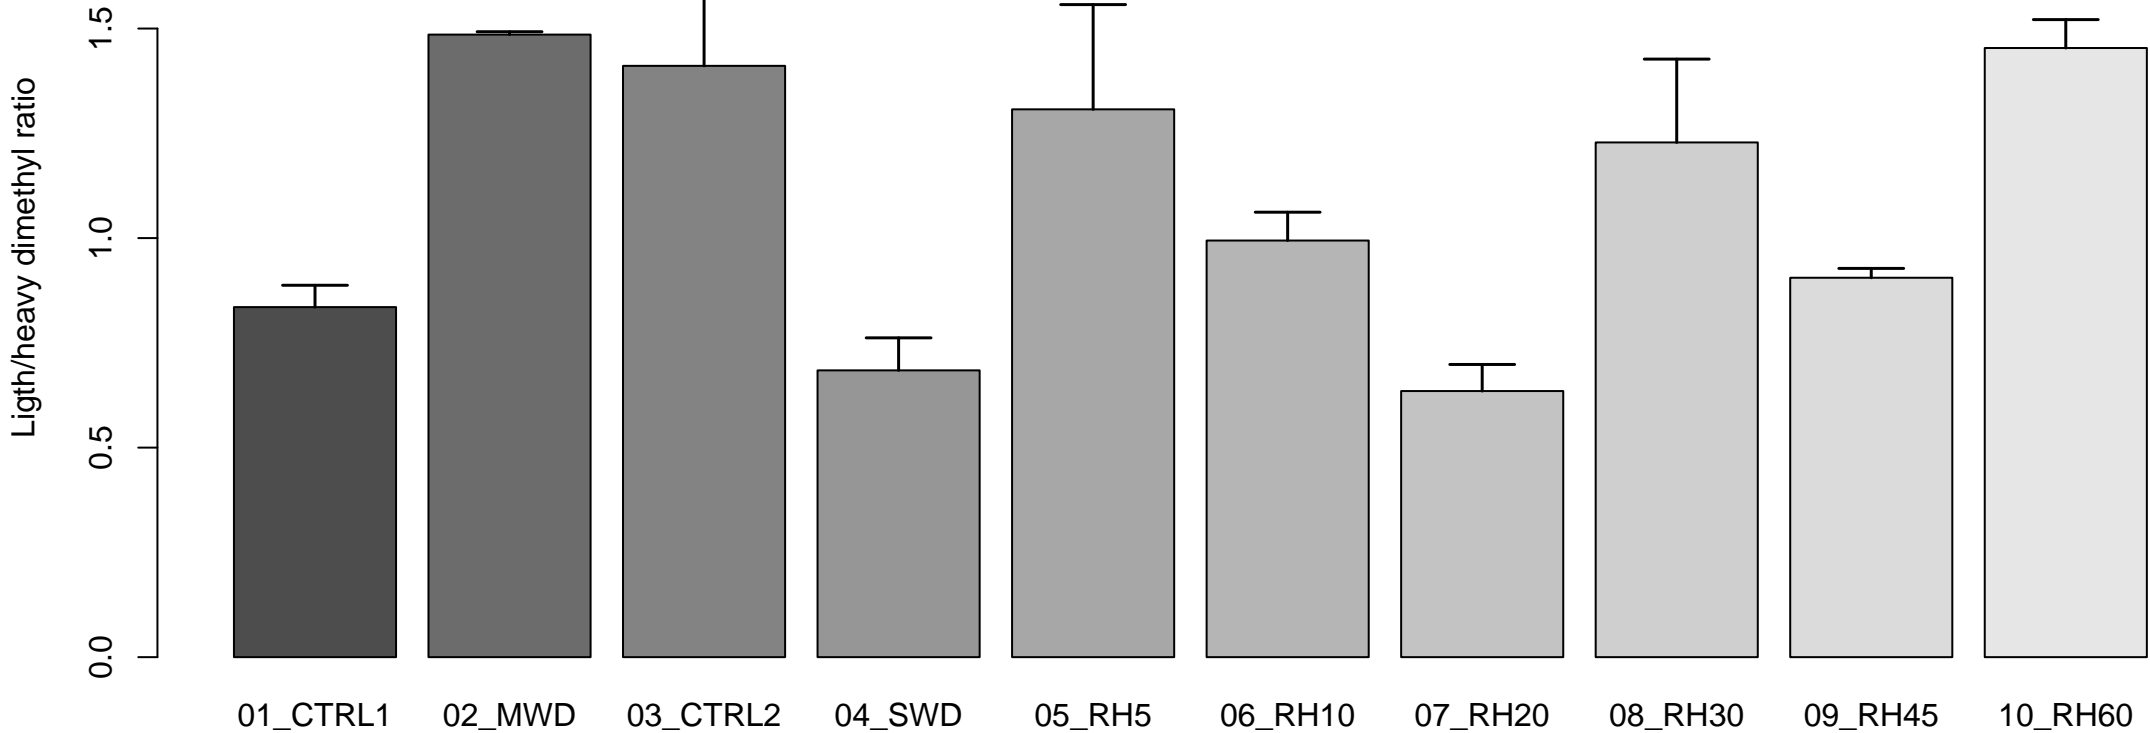

GRMZM2G443814\_P02

### Water-stress protein # T328

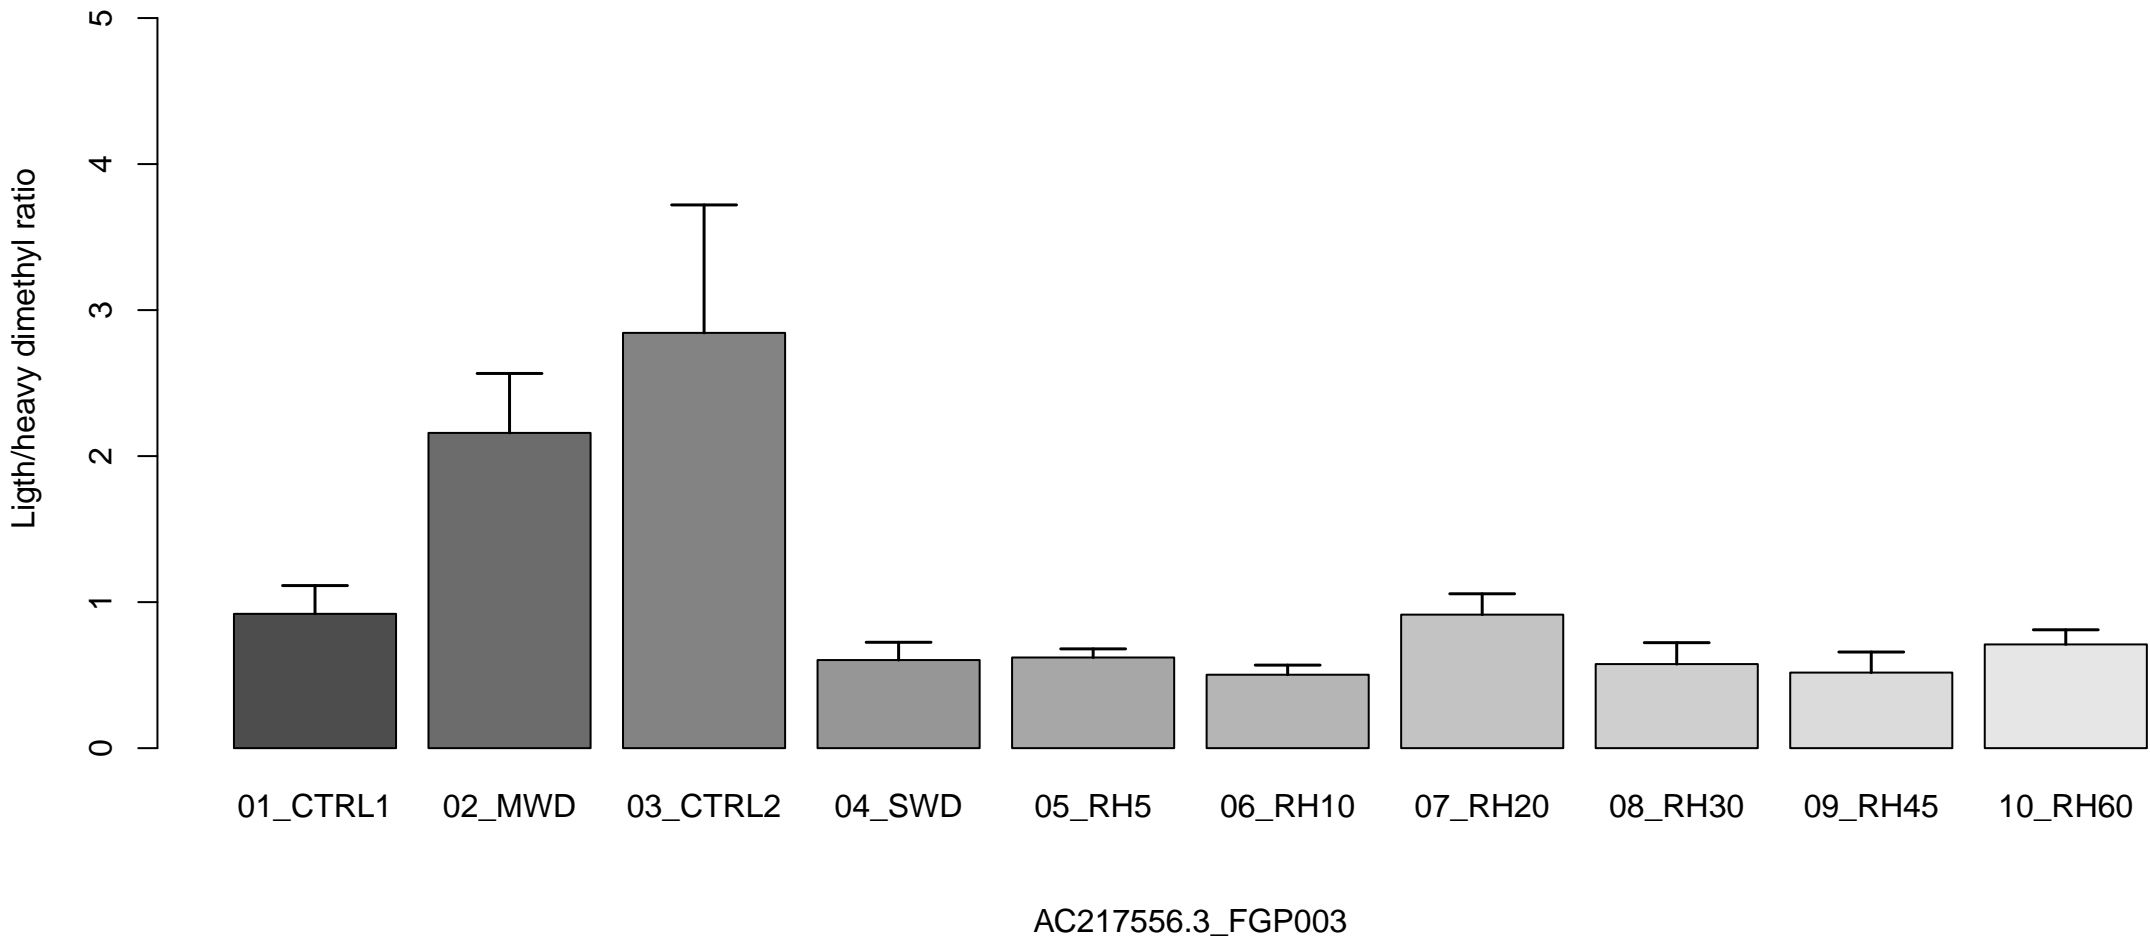

### Putative uncharacterized protein # S35

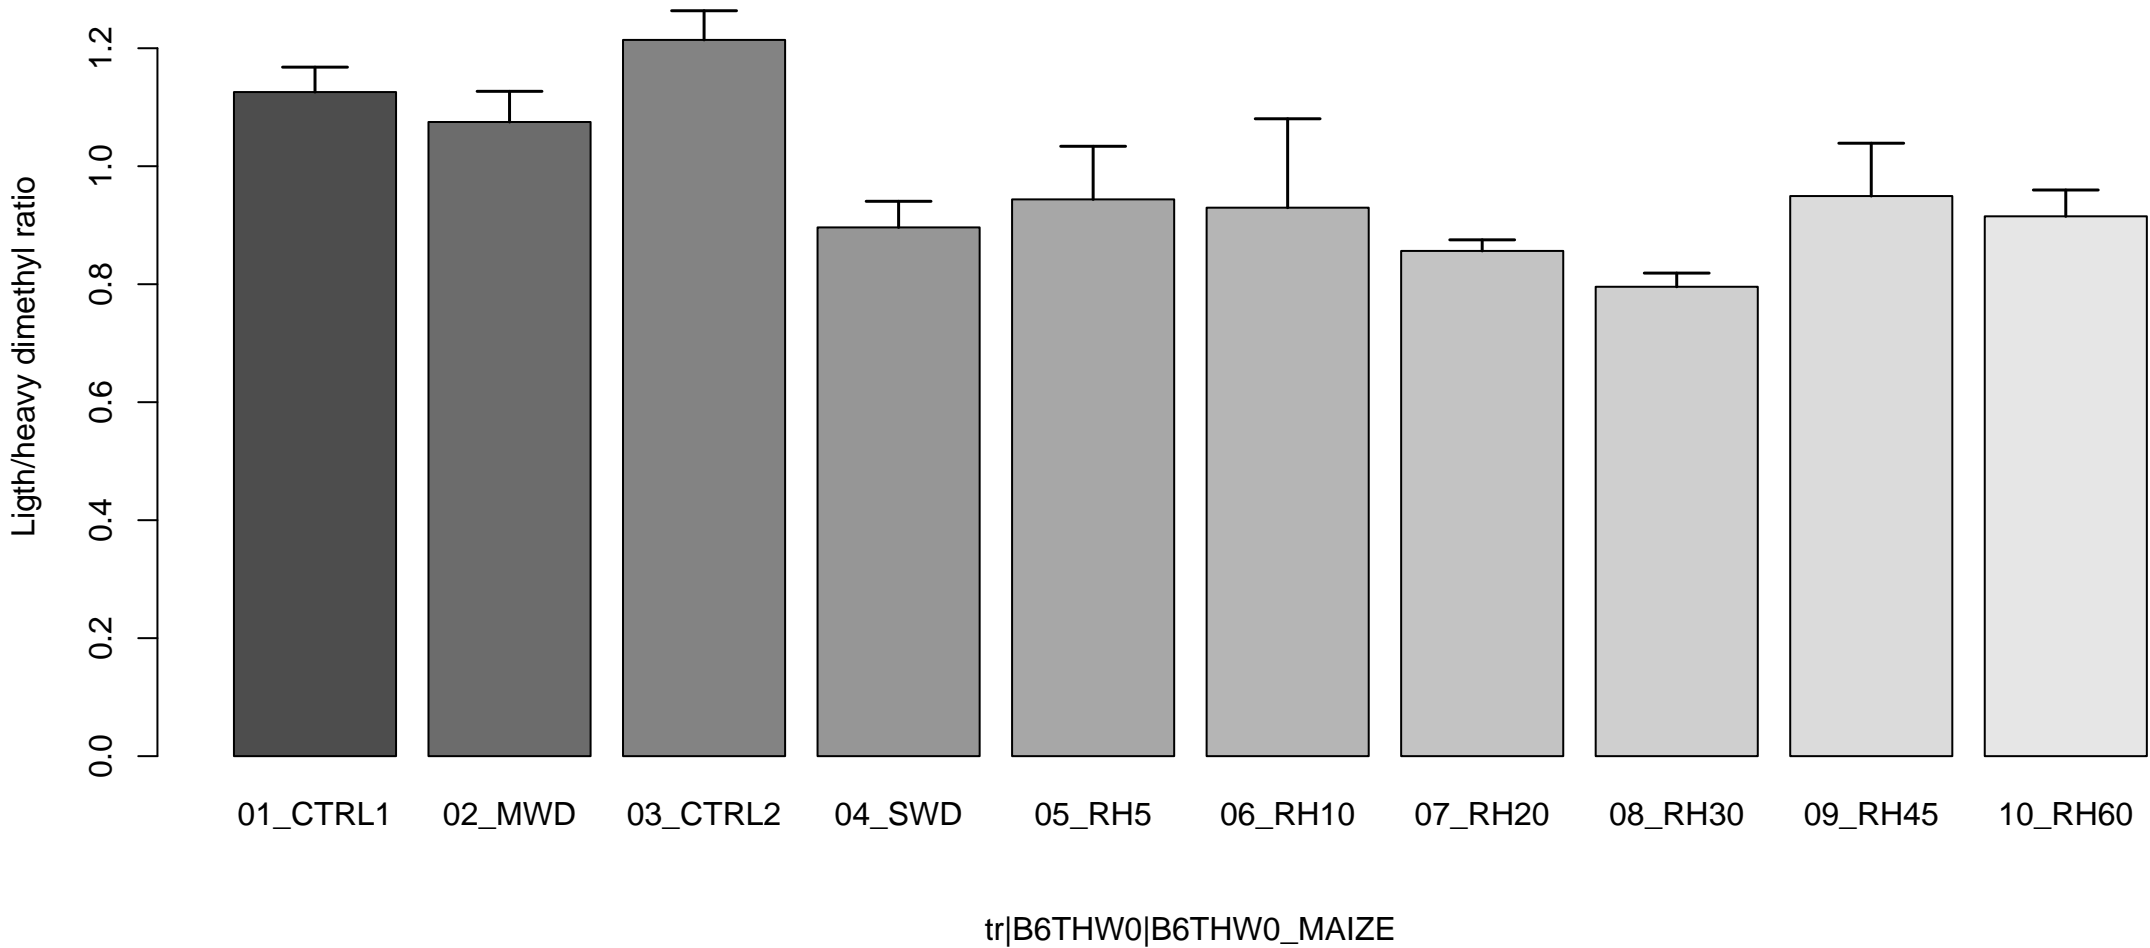

### Putative uncharacterized protein # S46/S47

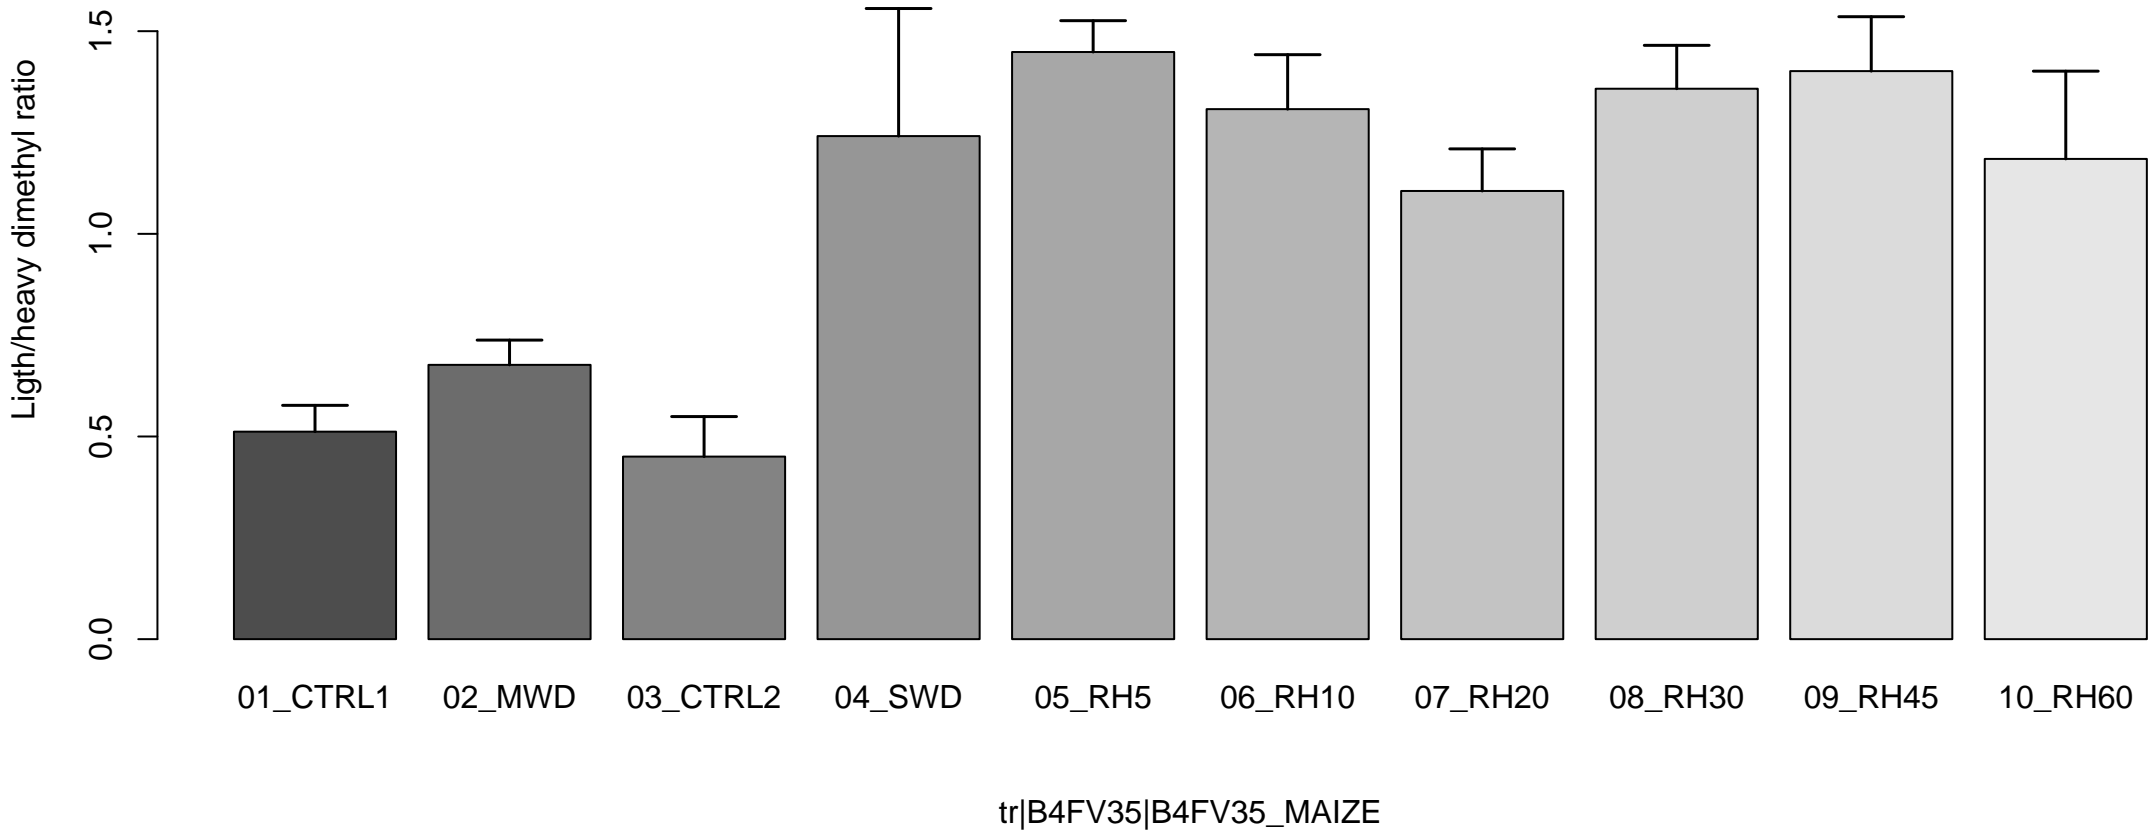



### Sterol 3-beta-glucosyltransferase # S74/T75

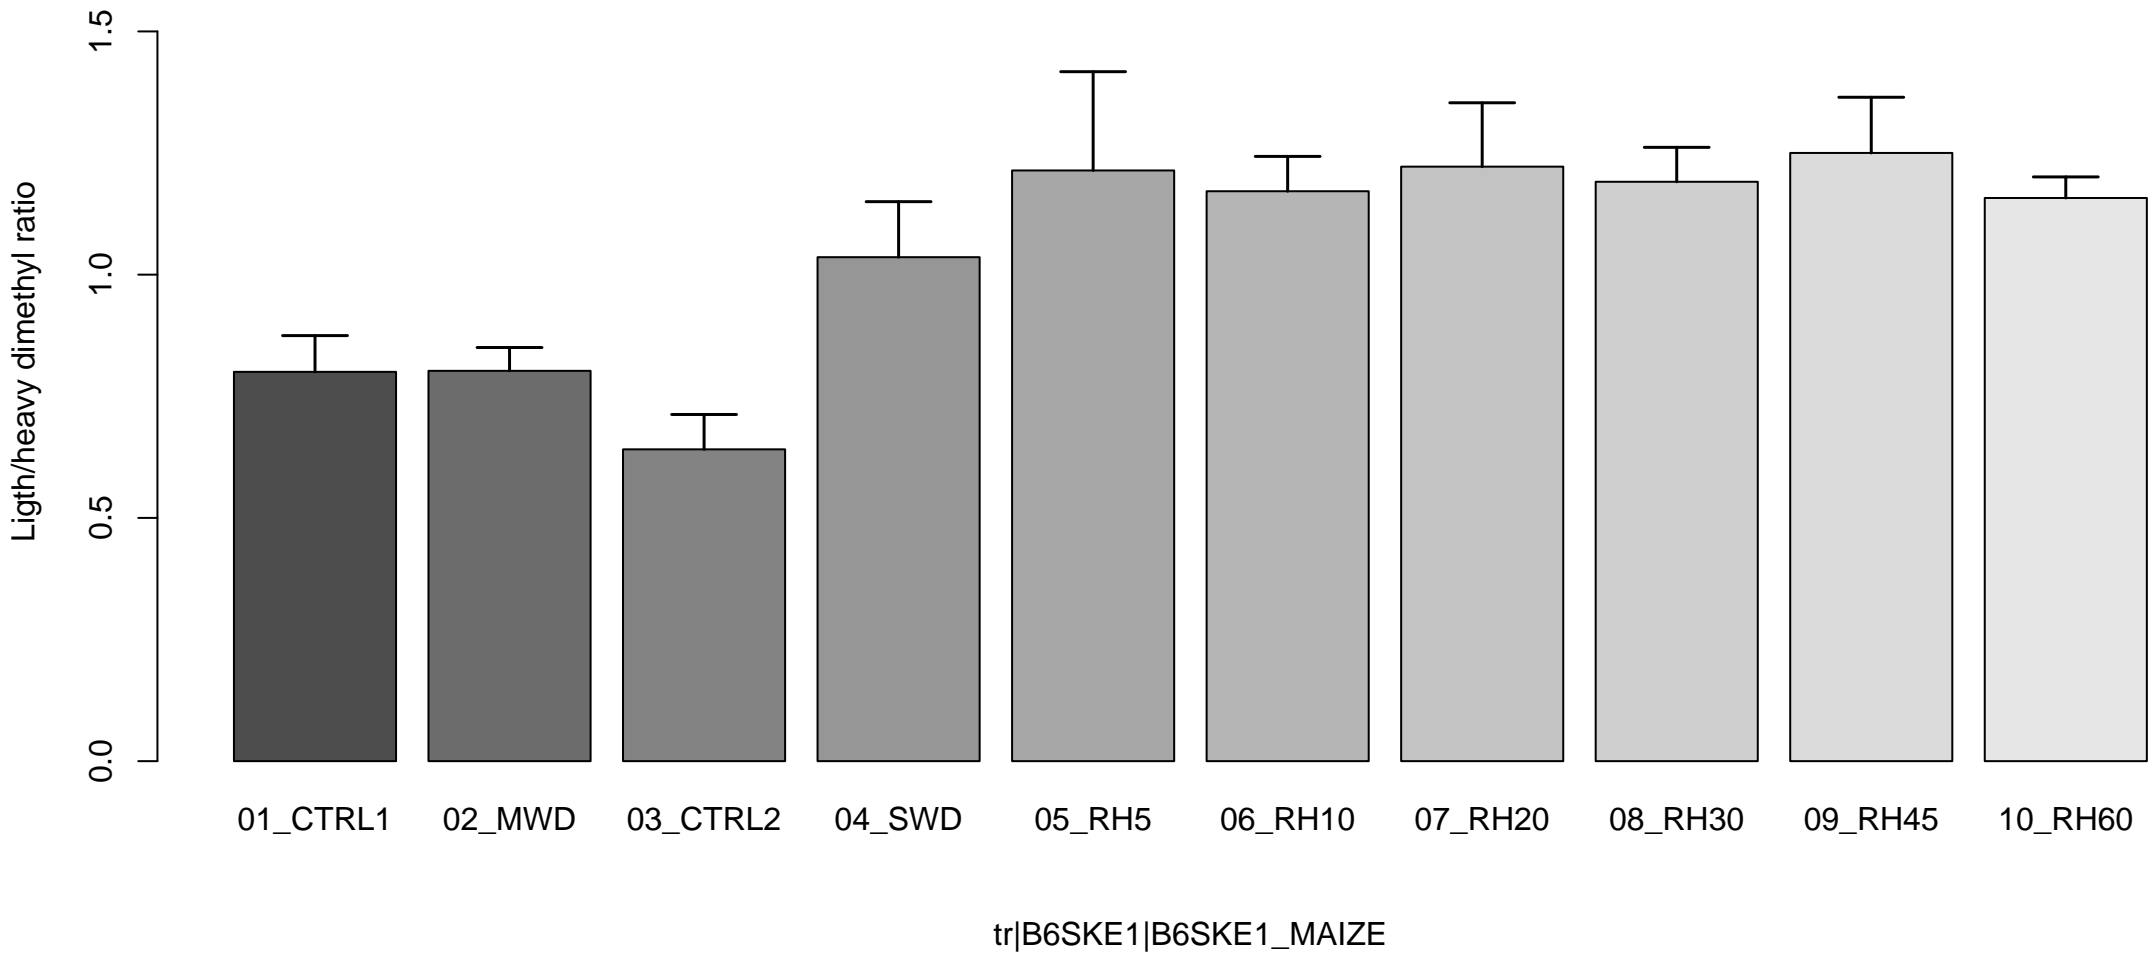

# Putative uncharacterized protein (IPR001005 SANT, DNA-binding) # S56

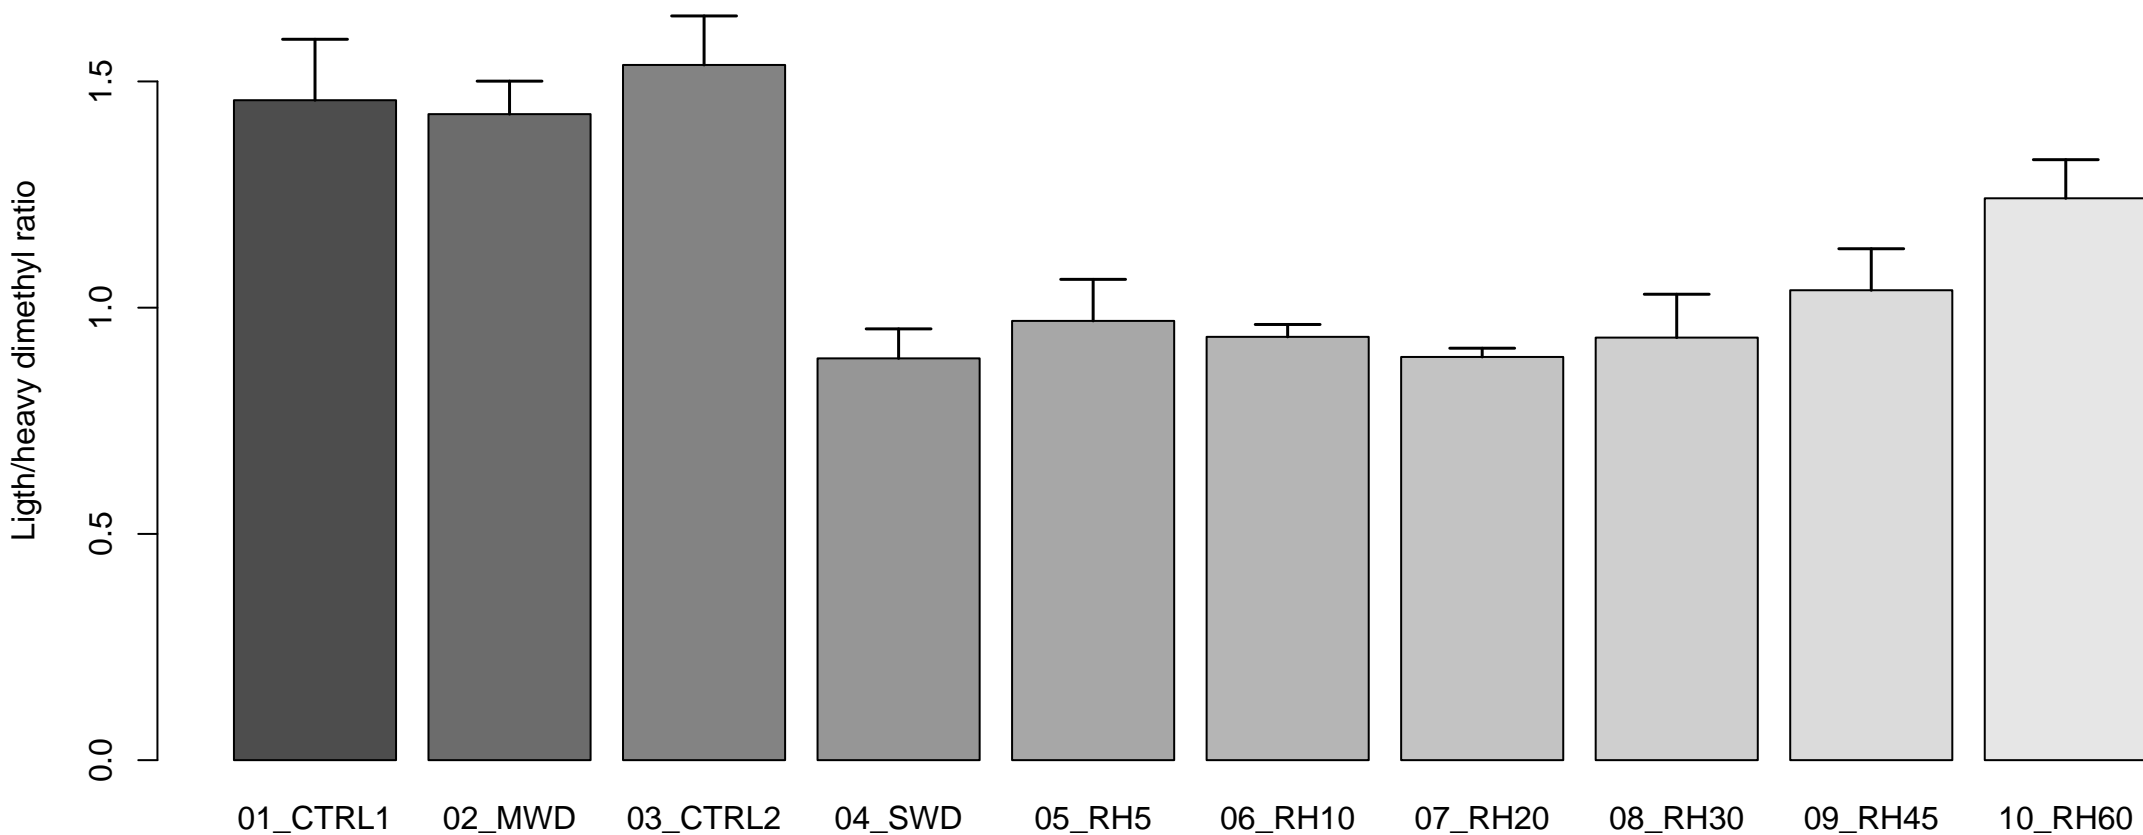

GRMZM2G334722\_P01

### Protein phosphatase inhibitor 2 containing protein # S5

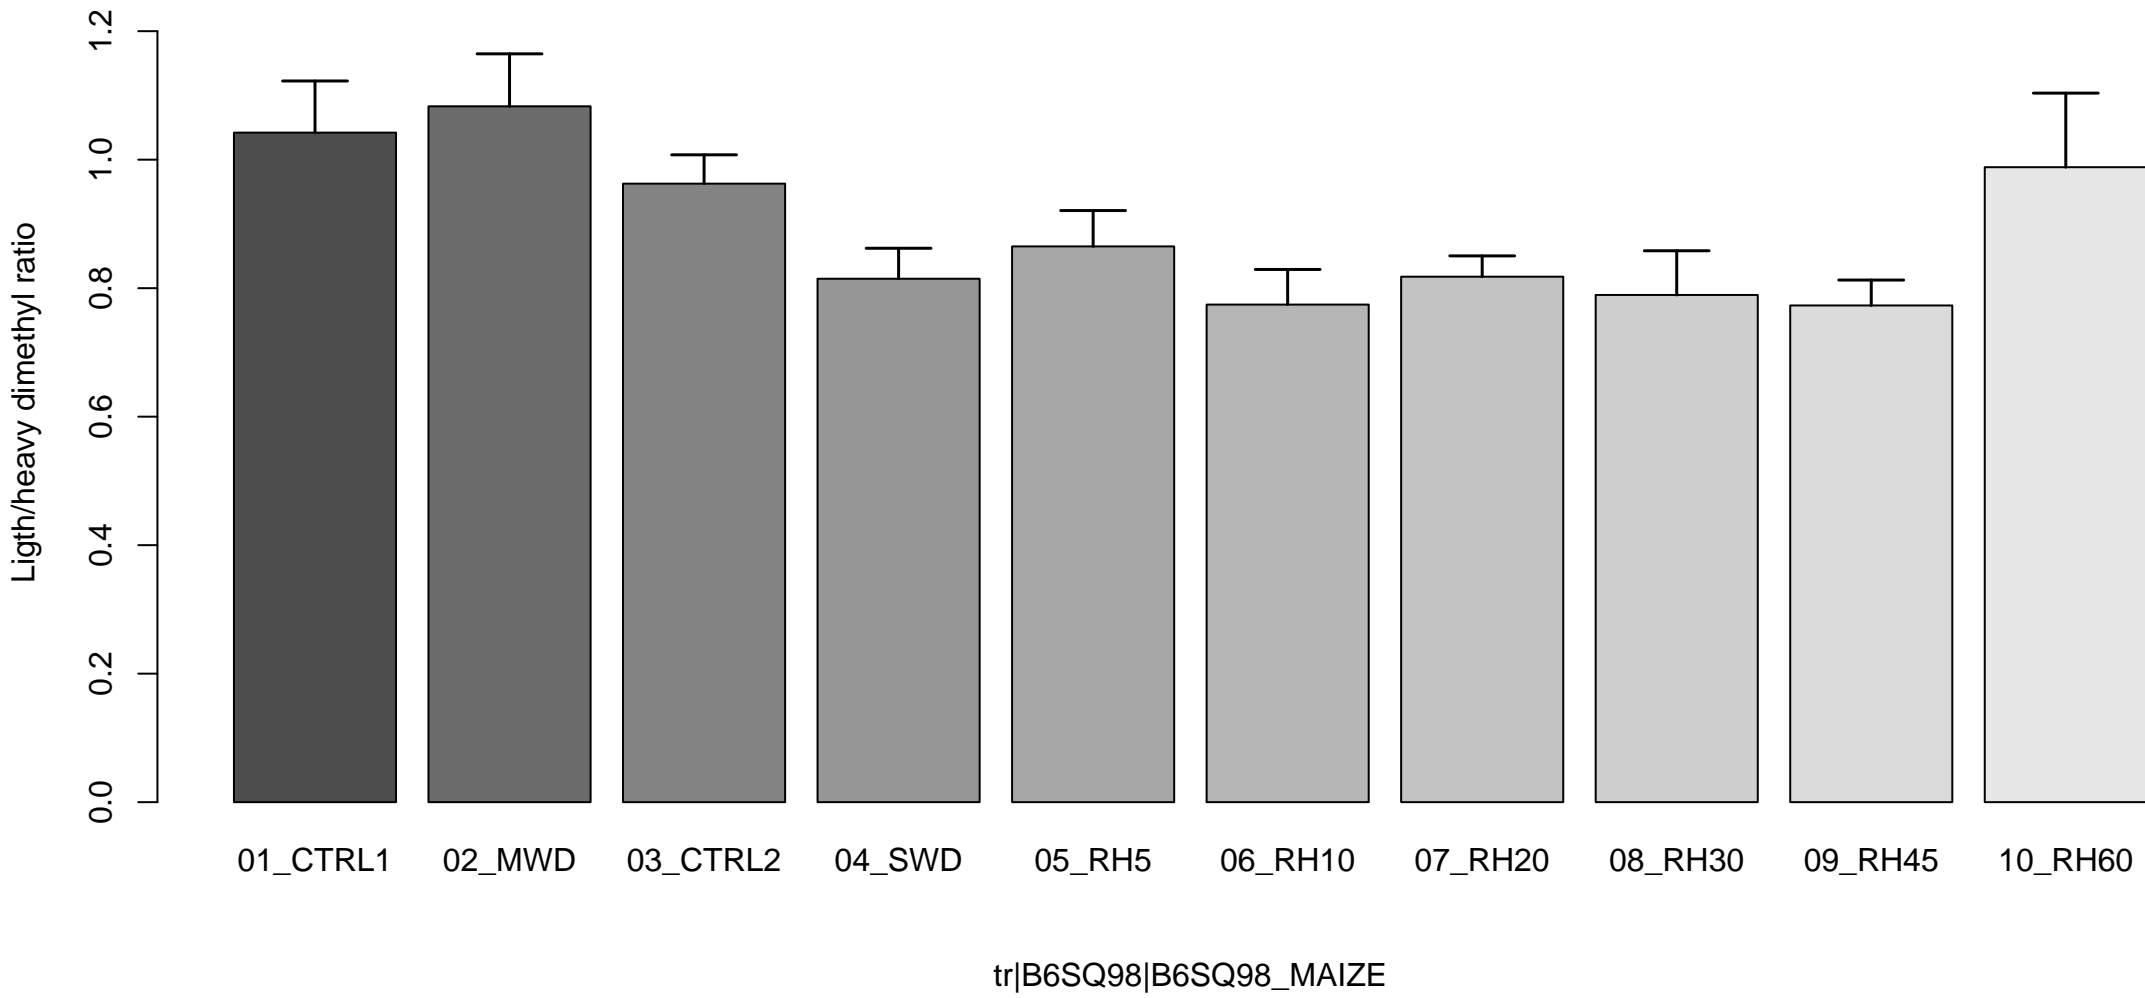

### Putative uncharacterized protein # S220

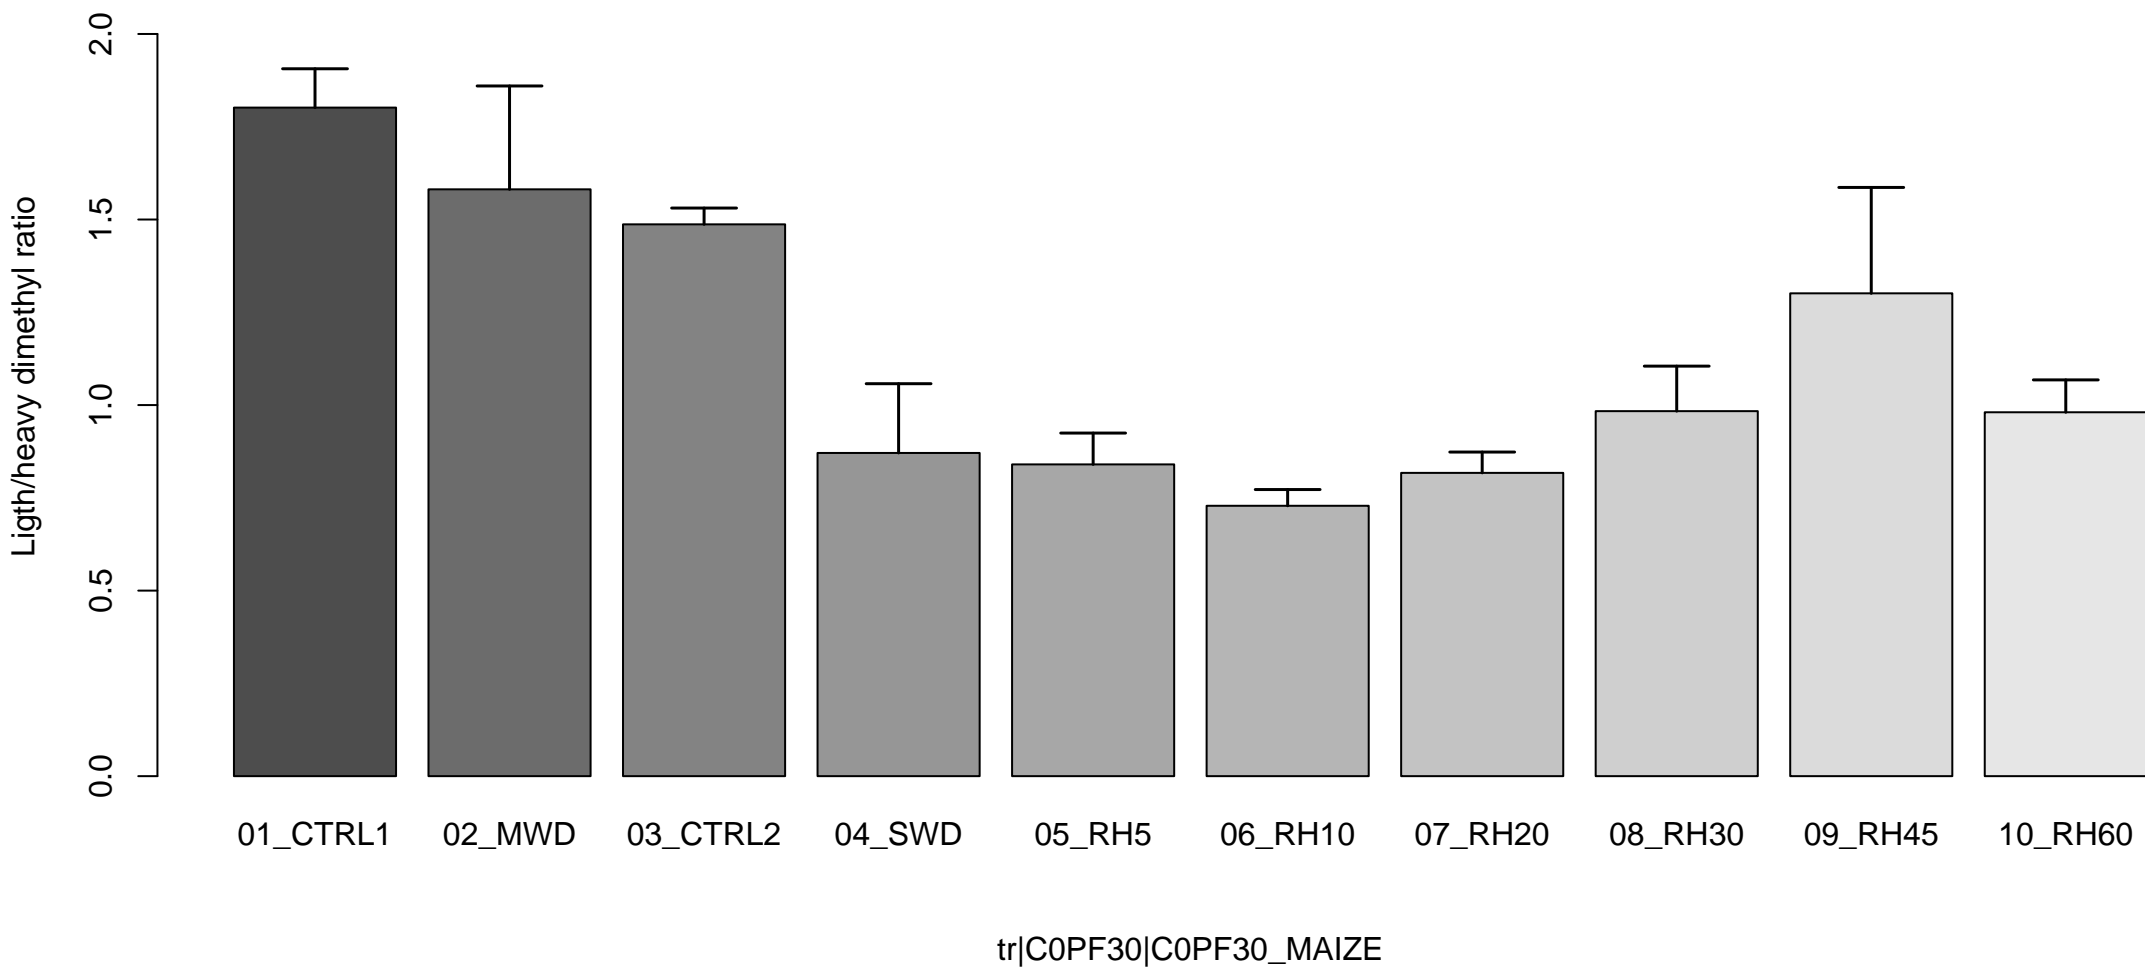

### Eukaryotic translation initiation factor 4B # T274

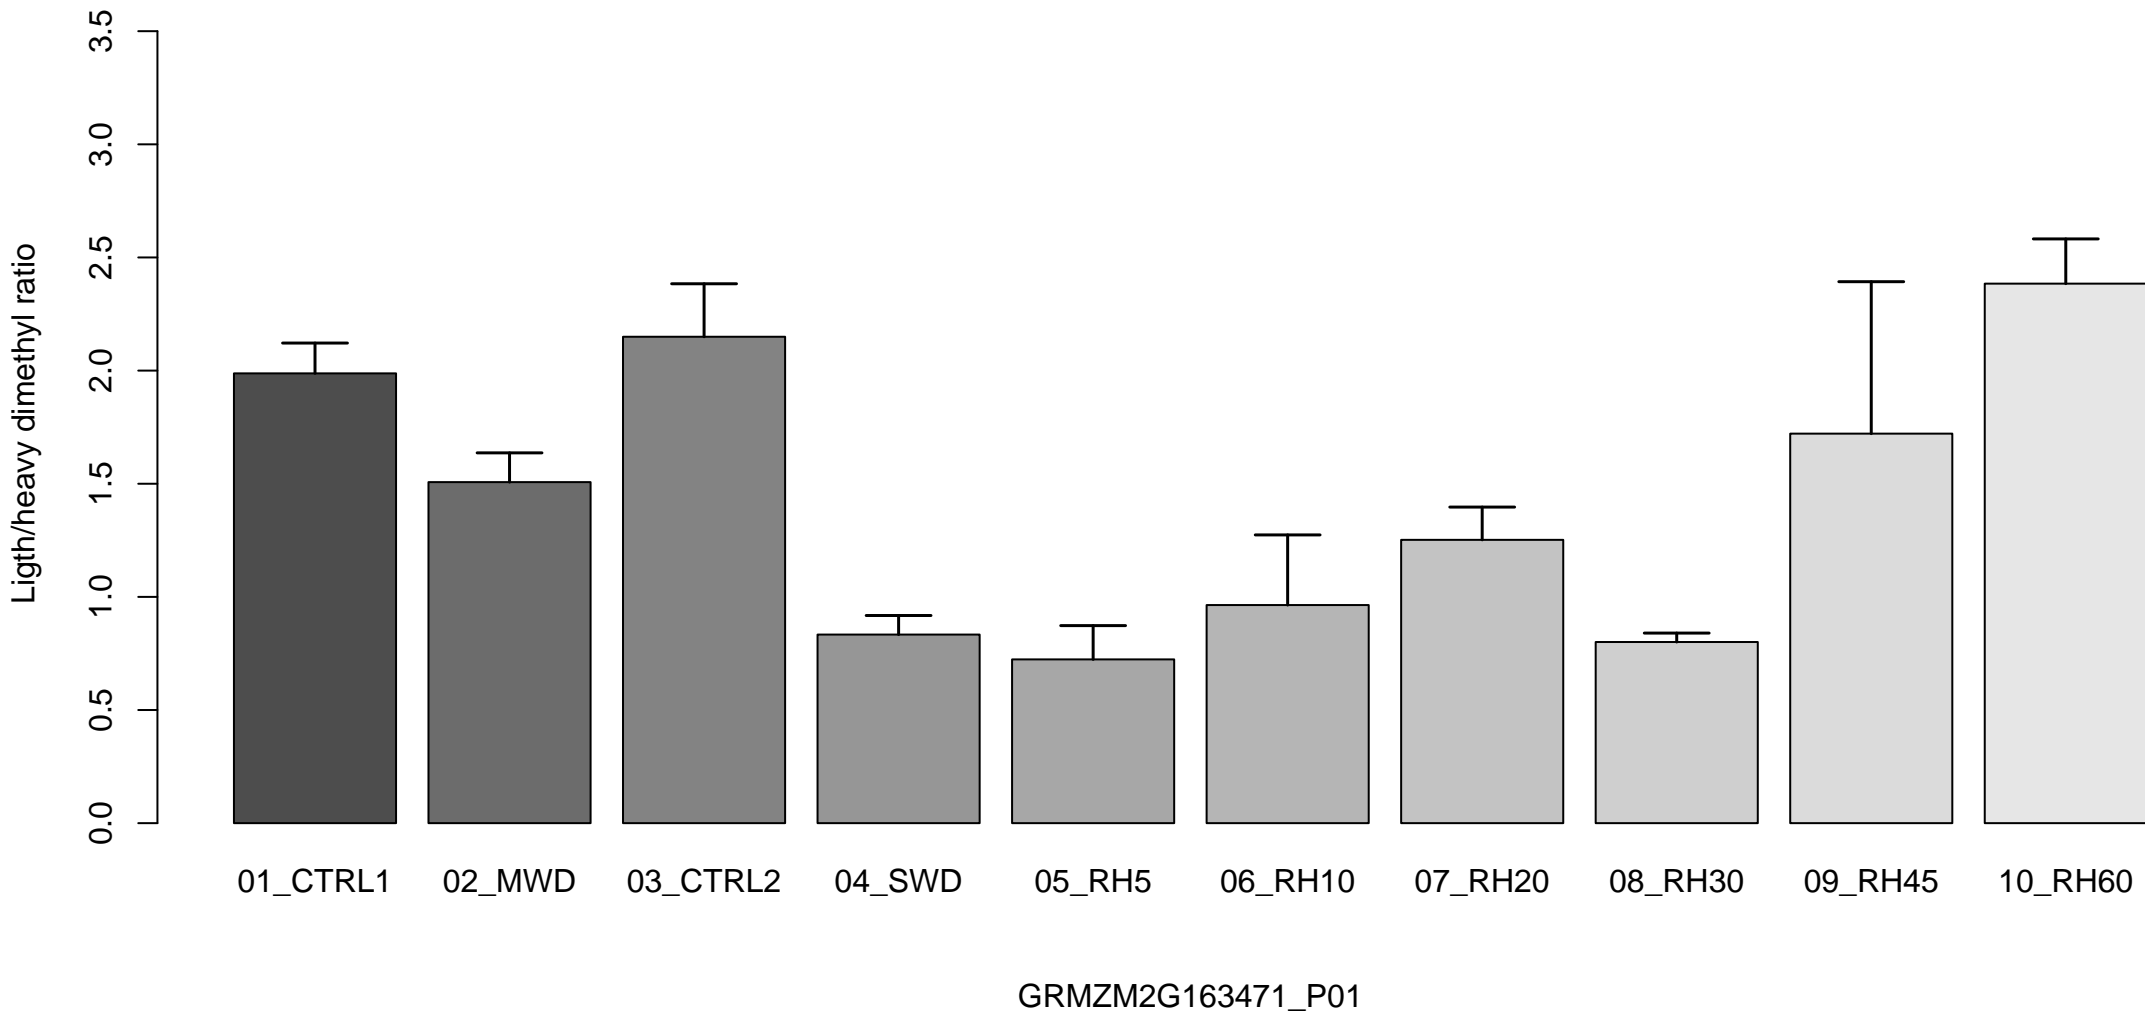

### Putative uncharacterized protein # S25

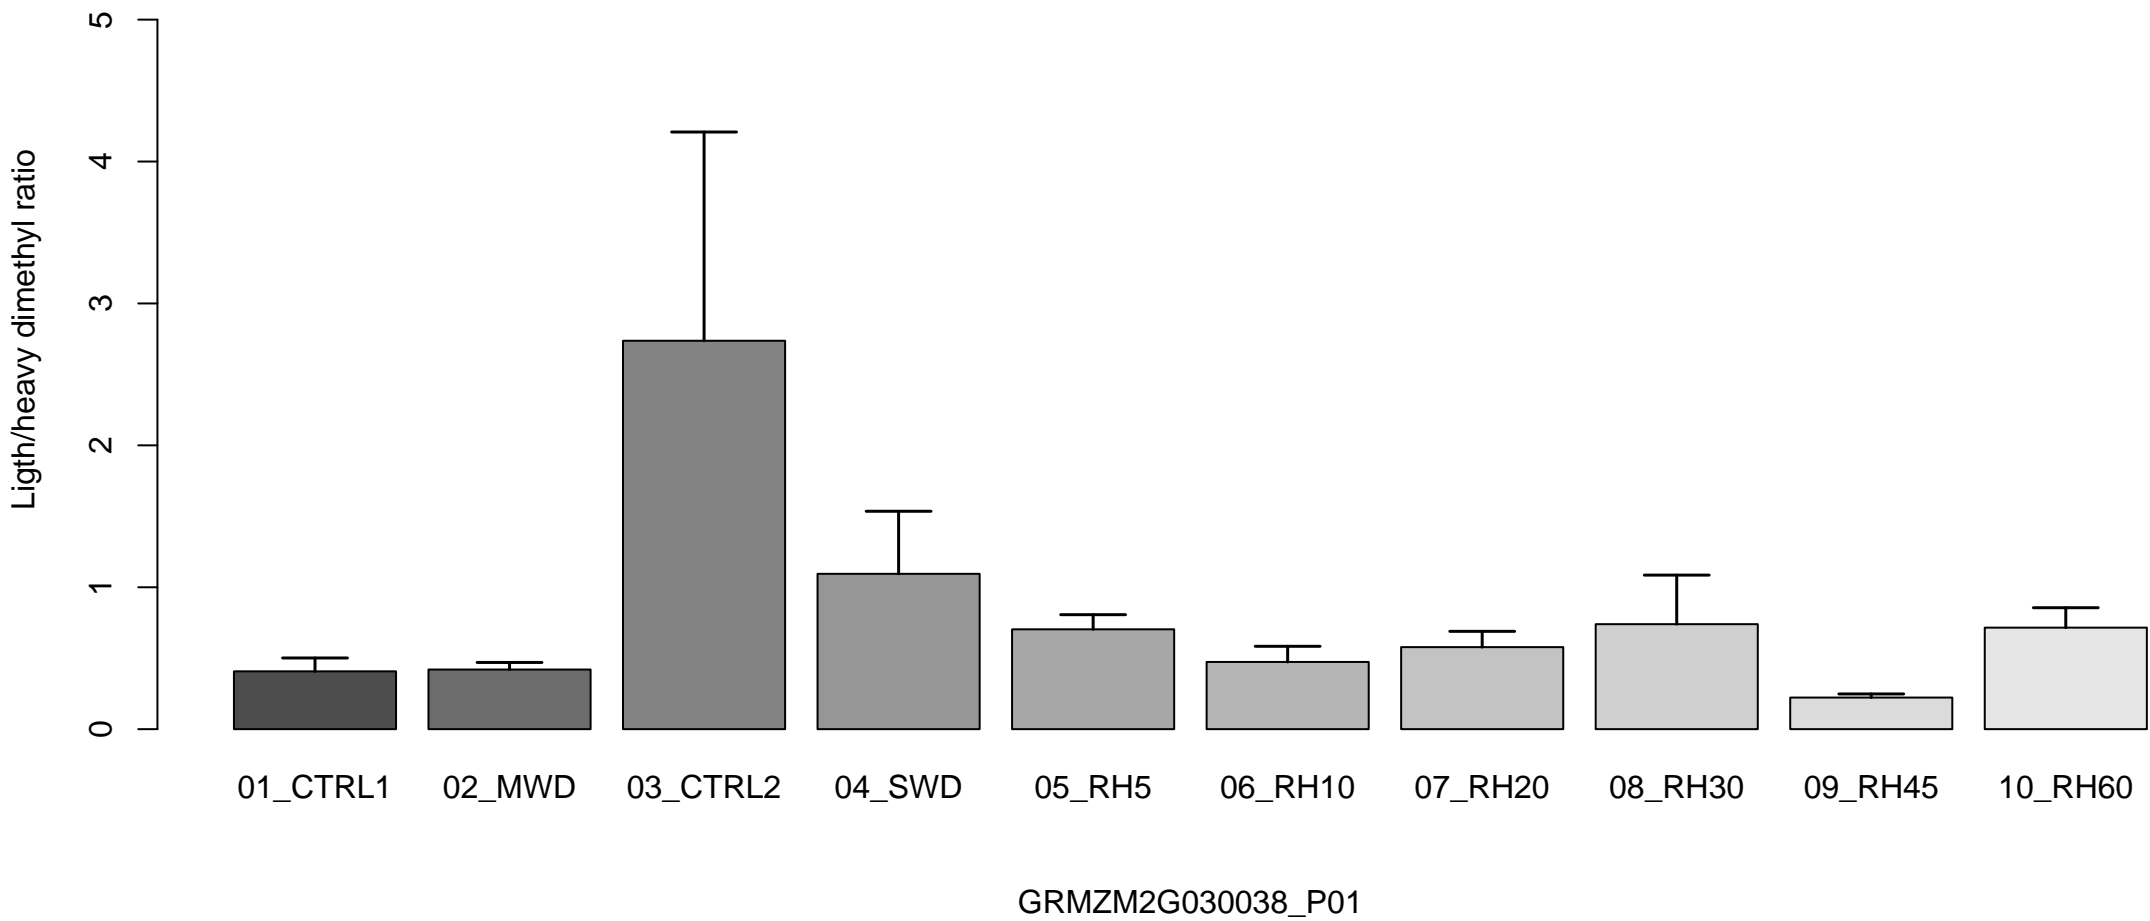

# Dehydrin COR410 # T194

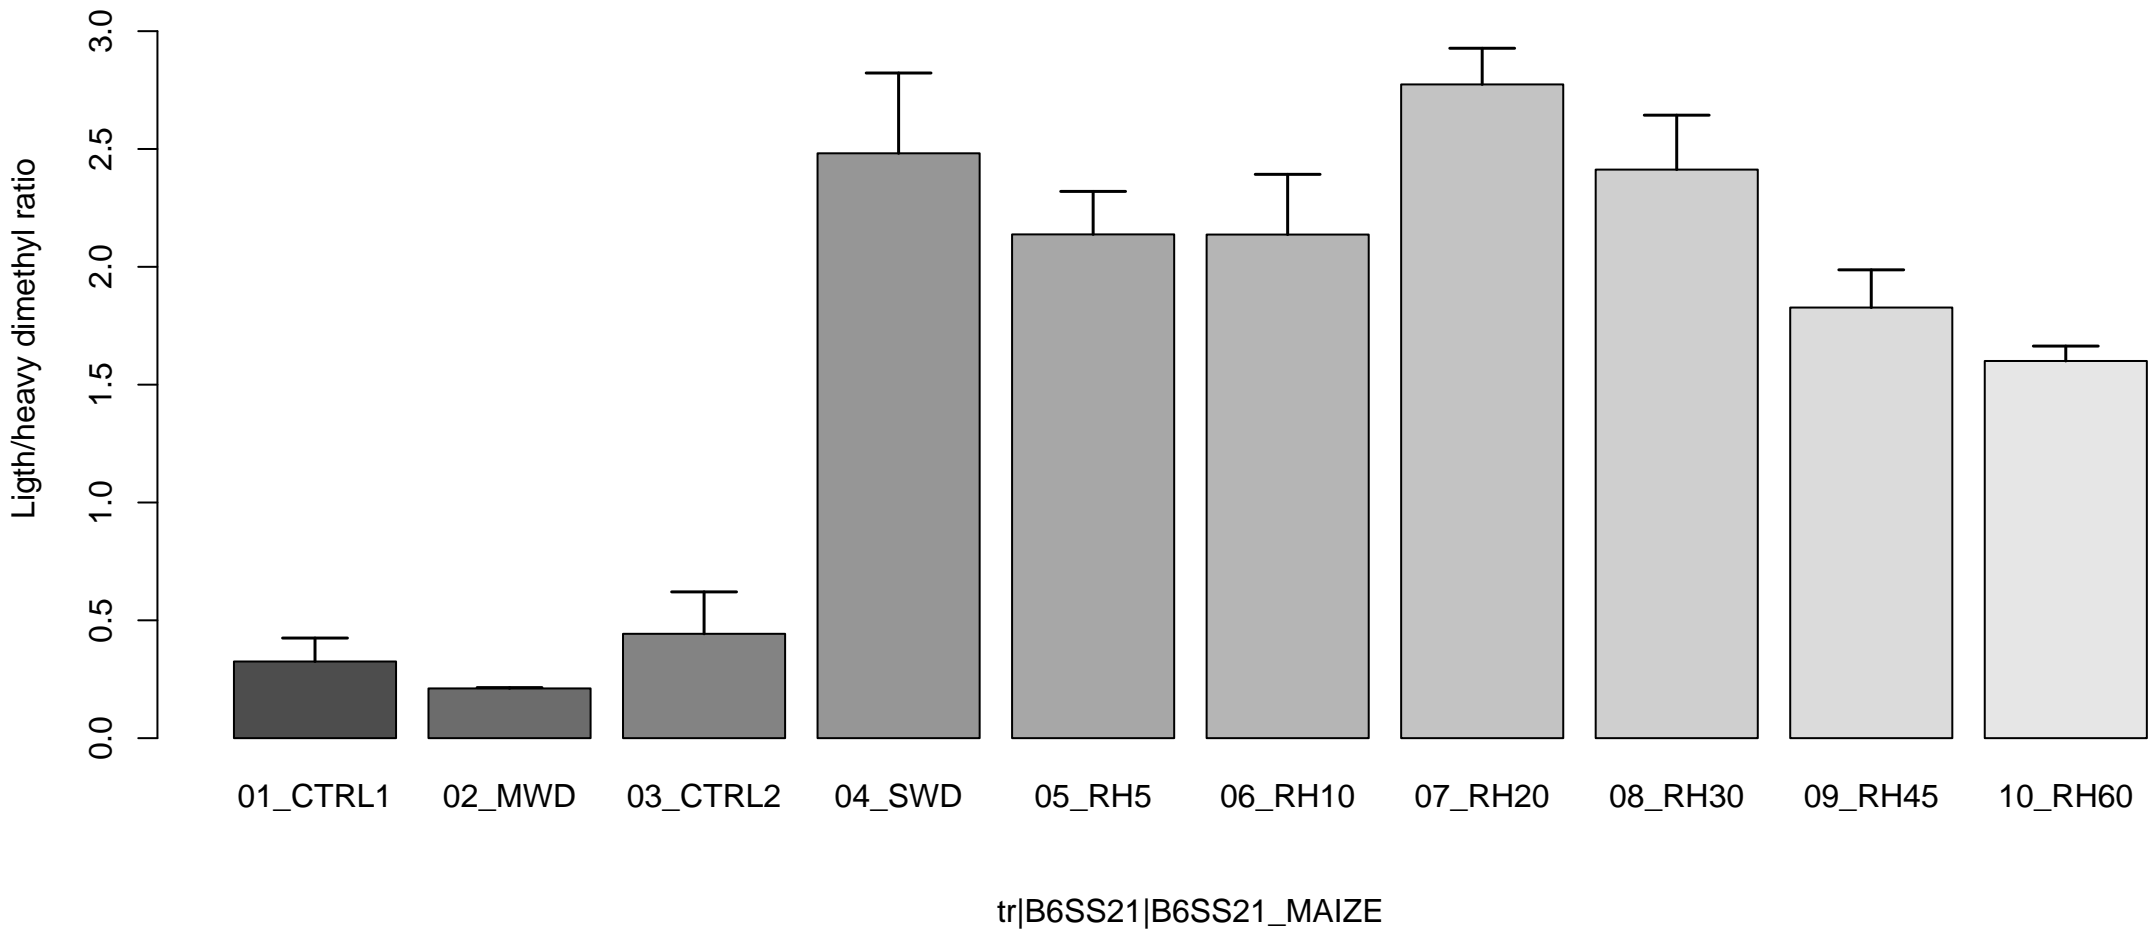

### Lectin-like protein # S33/T35

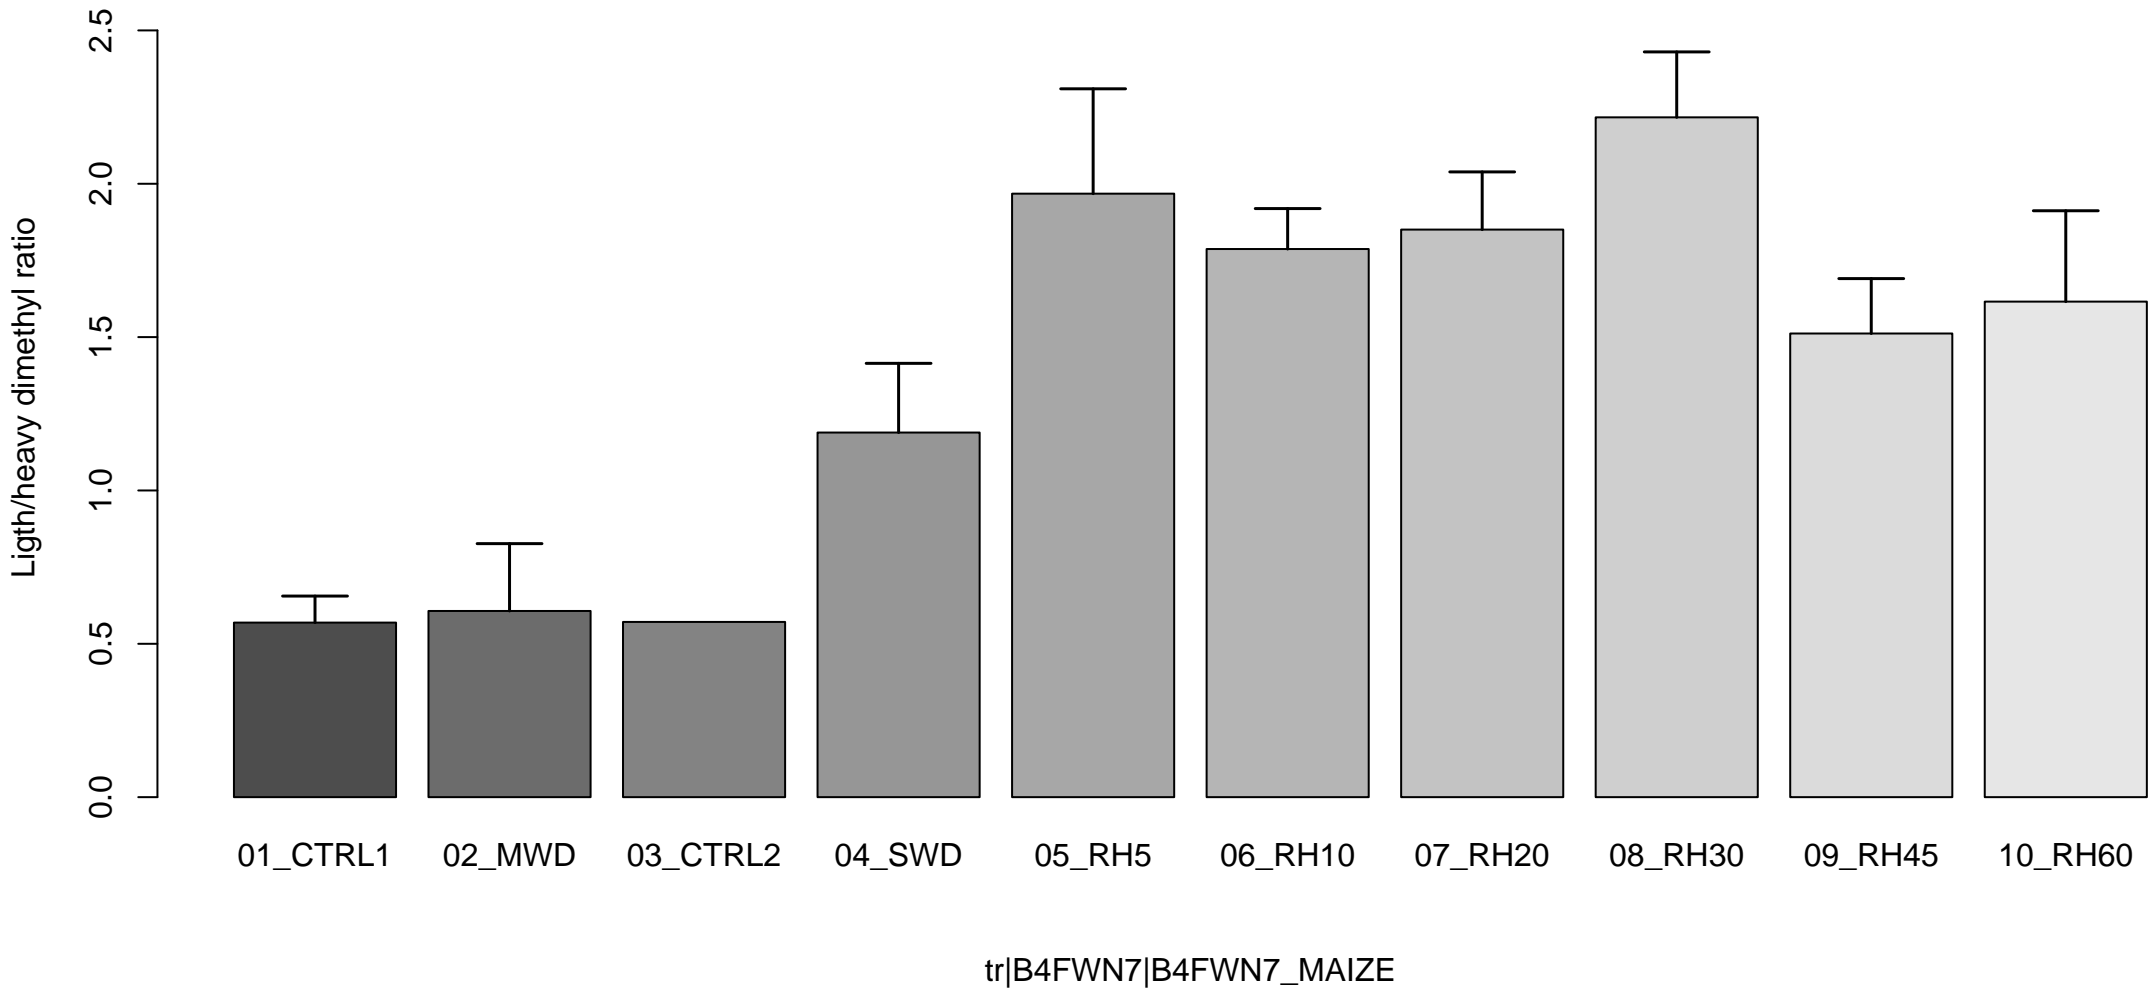



# SnRK2.4 # S158

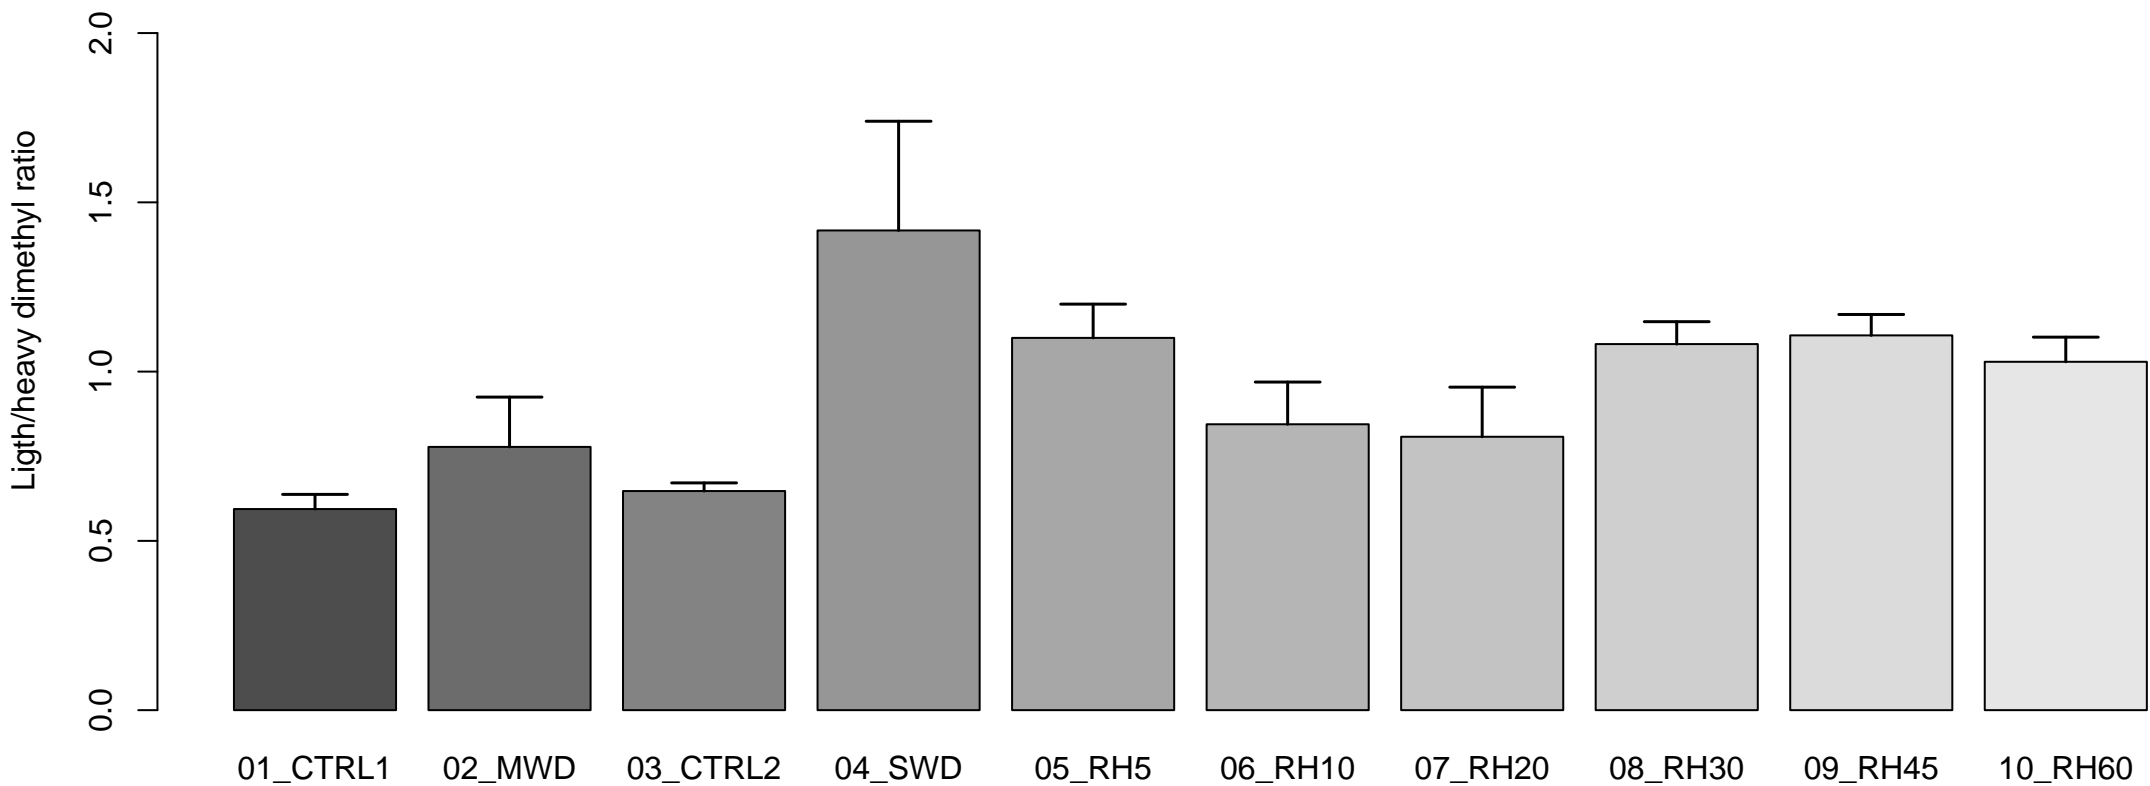

GRMZM2G110922\_P04

### GCK-like kinase MIK # S204

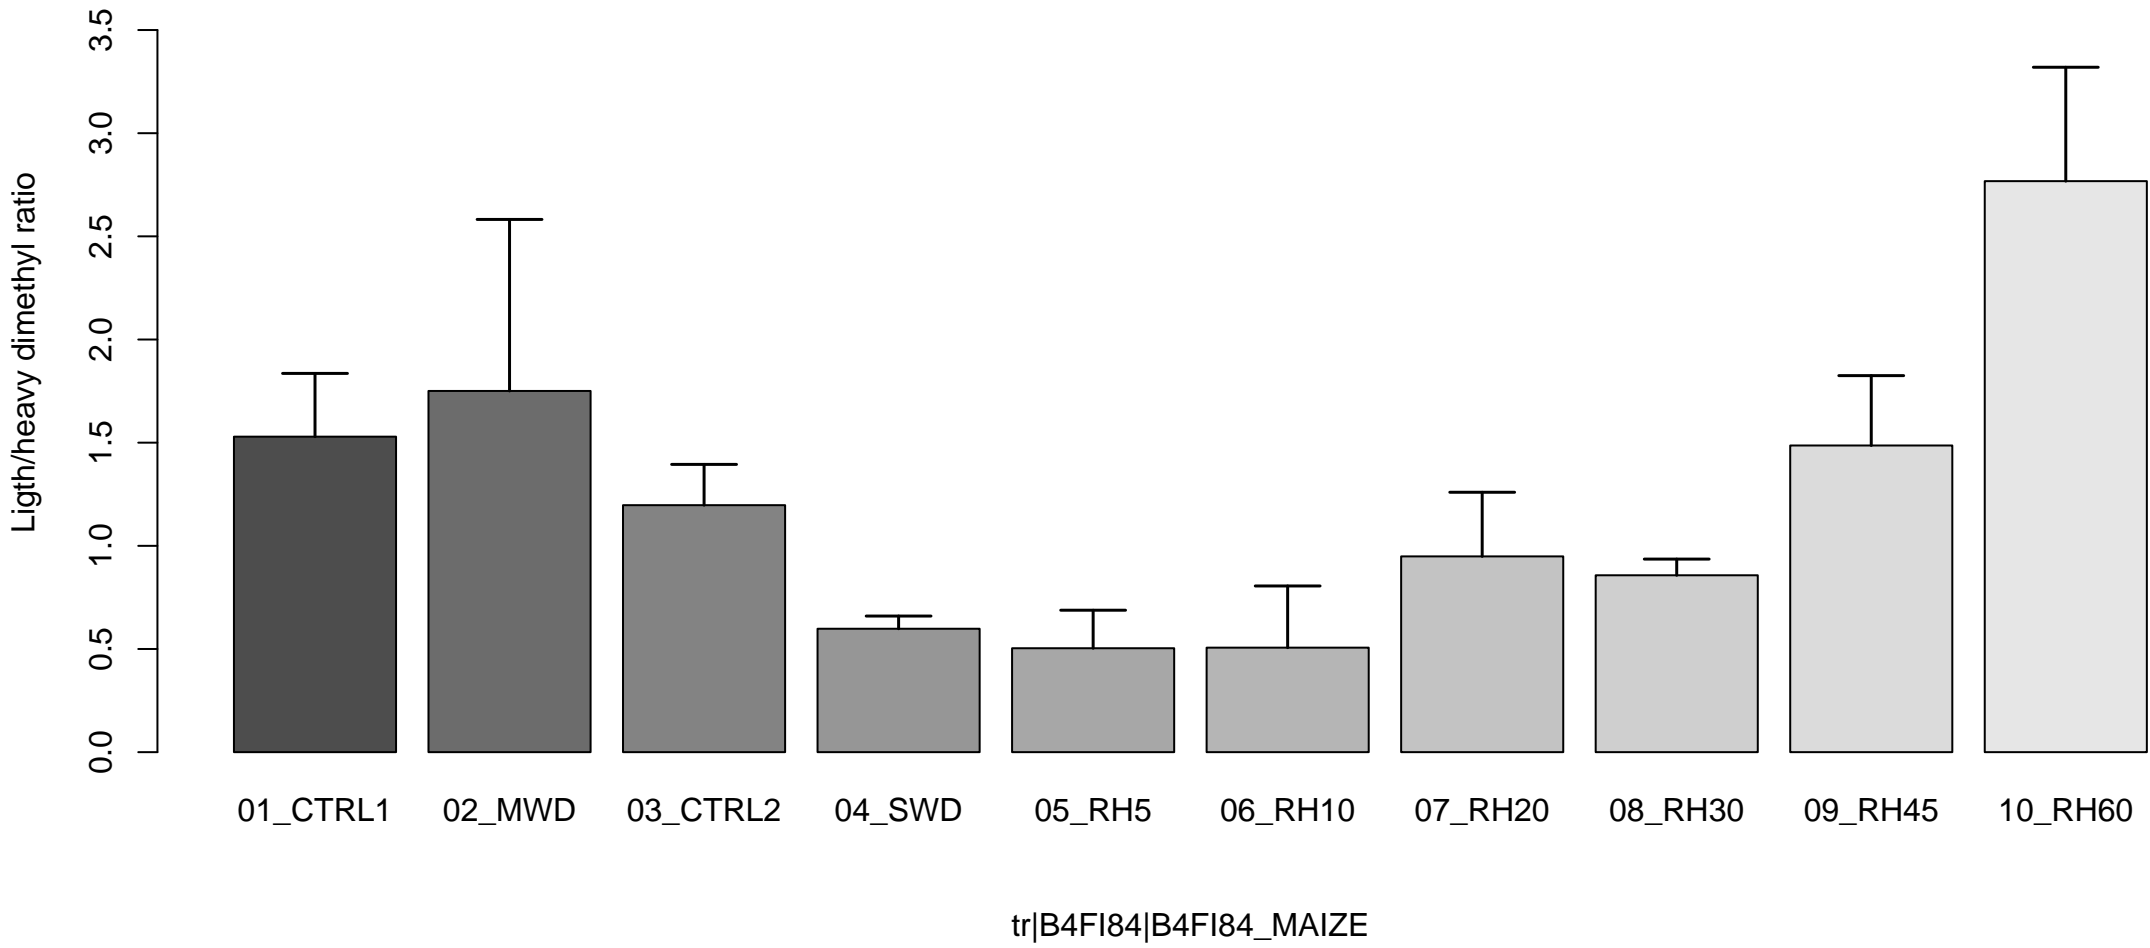

### Pollen-specific protein SF3 # S79

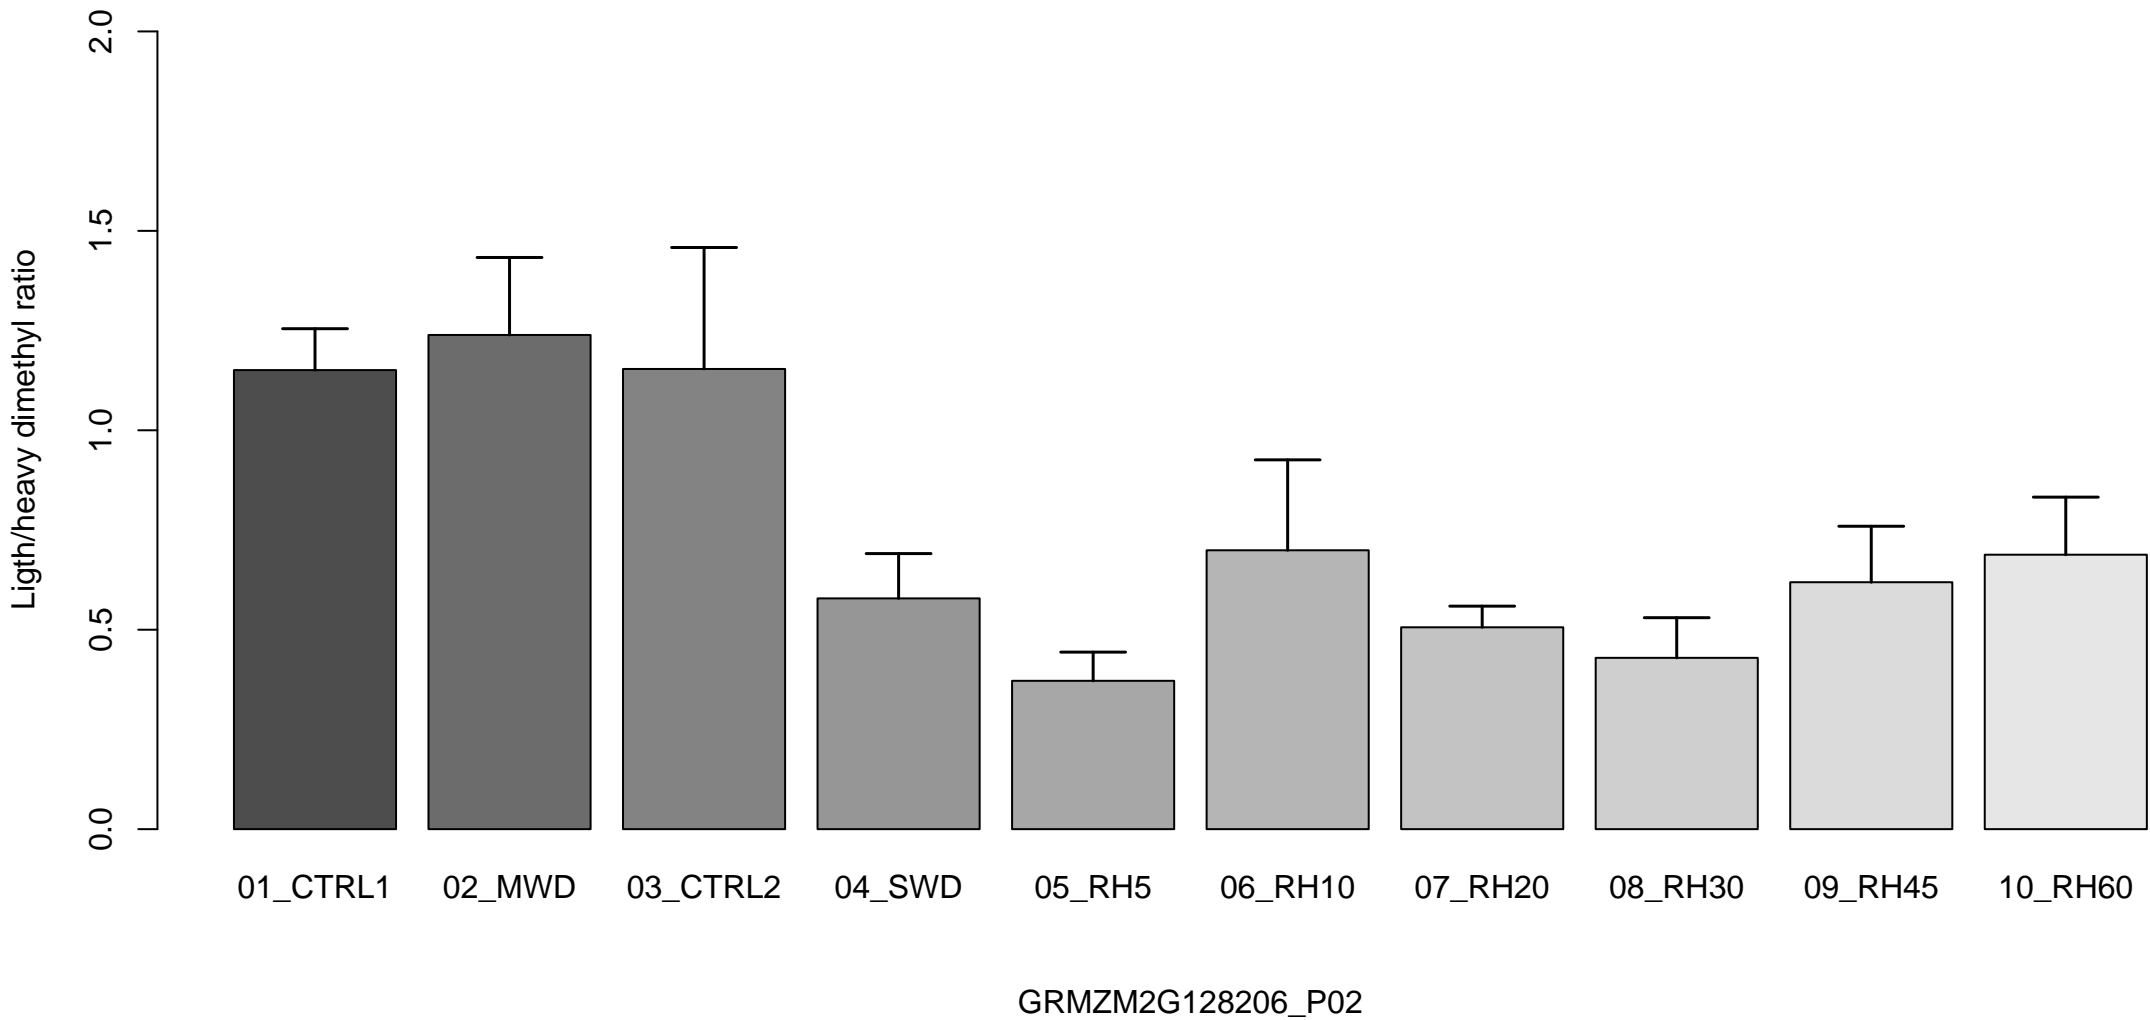

### CLIP-associating protein 1-like # S1152, T1161

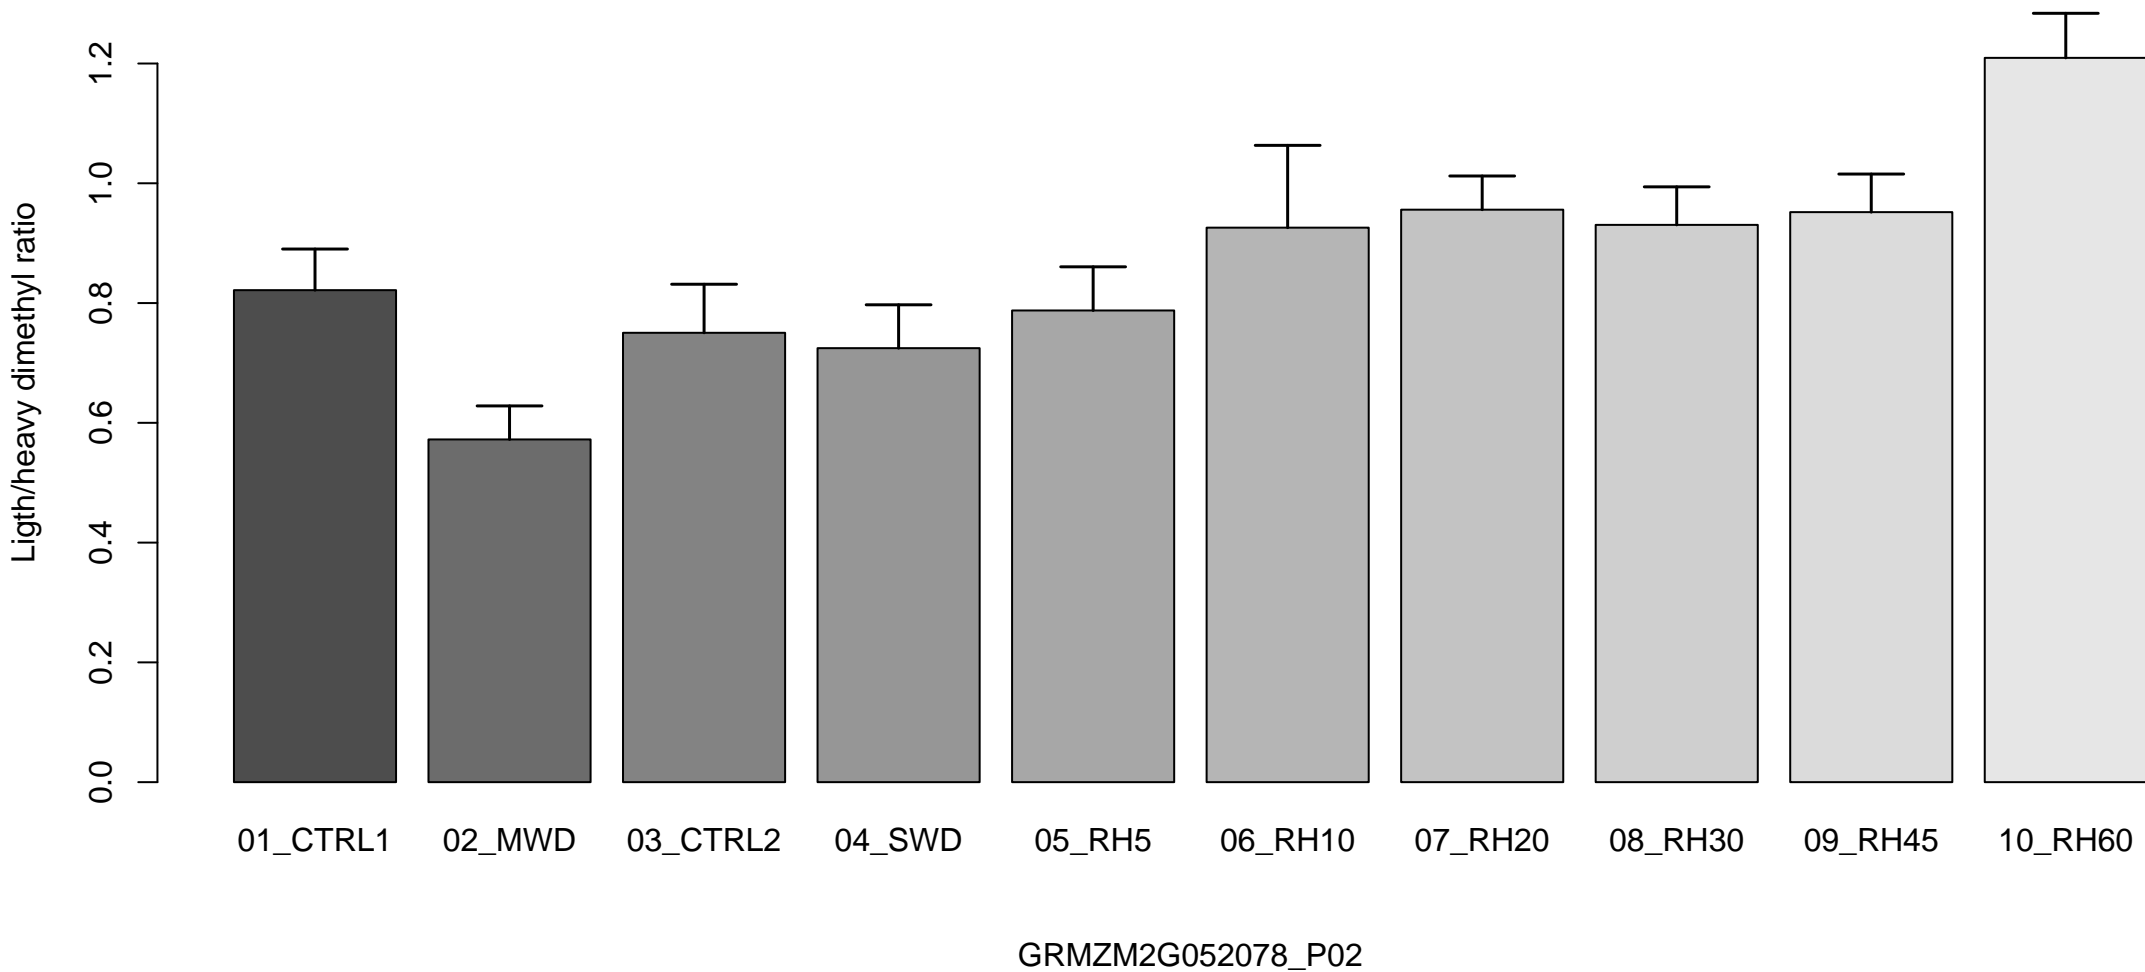

### Bromo-adjacent homology (BAH) domain-containing protein-like # S744

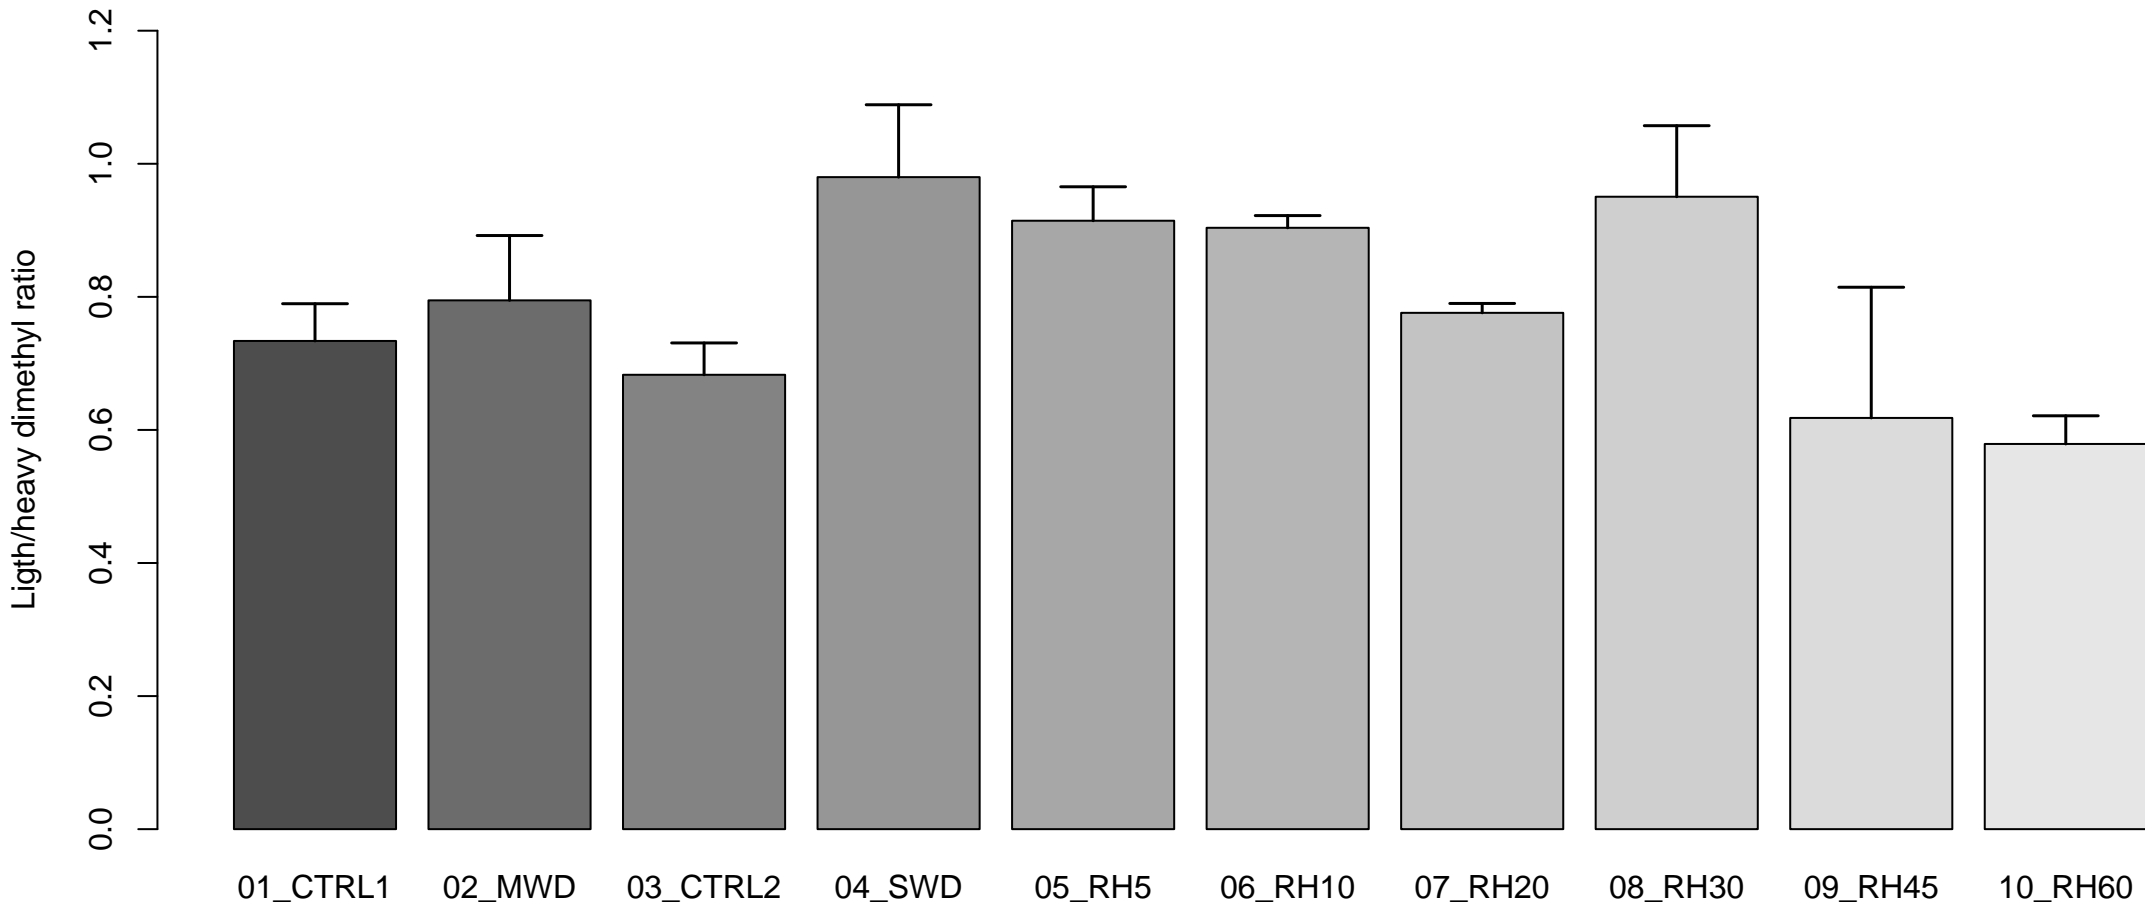

GRMZM2G704338\_P02

### Calmodulin binding protein # S345

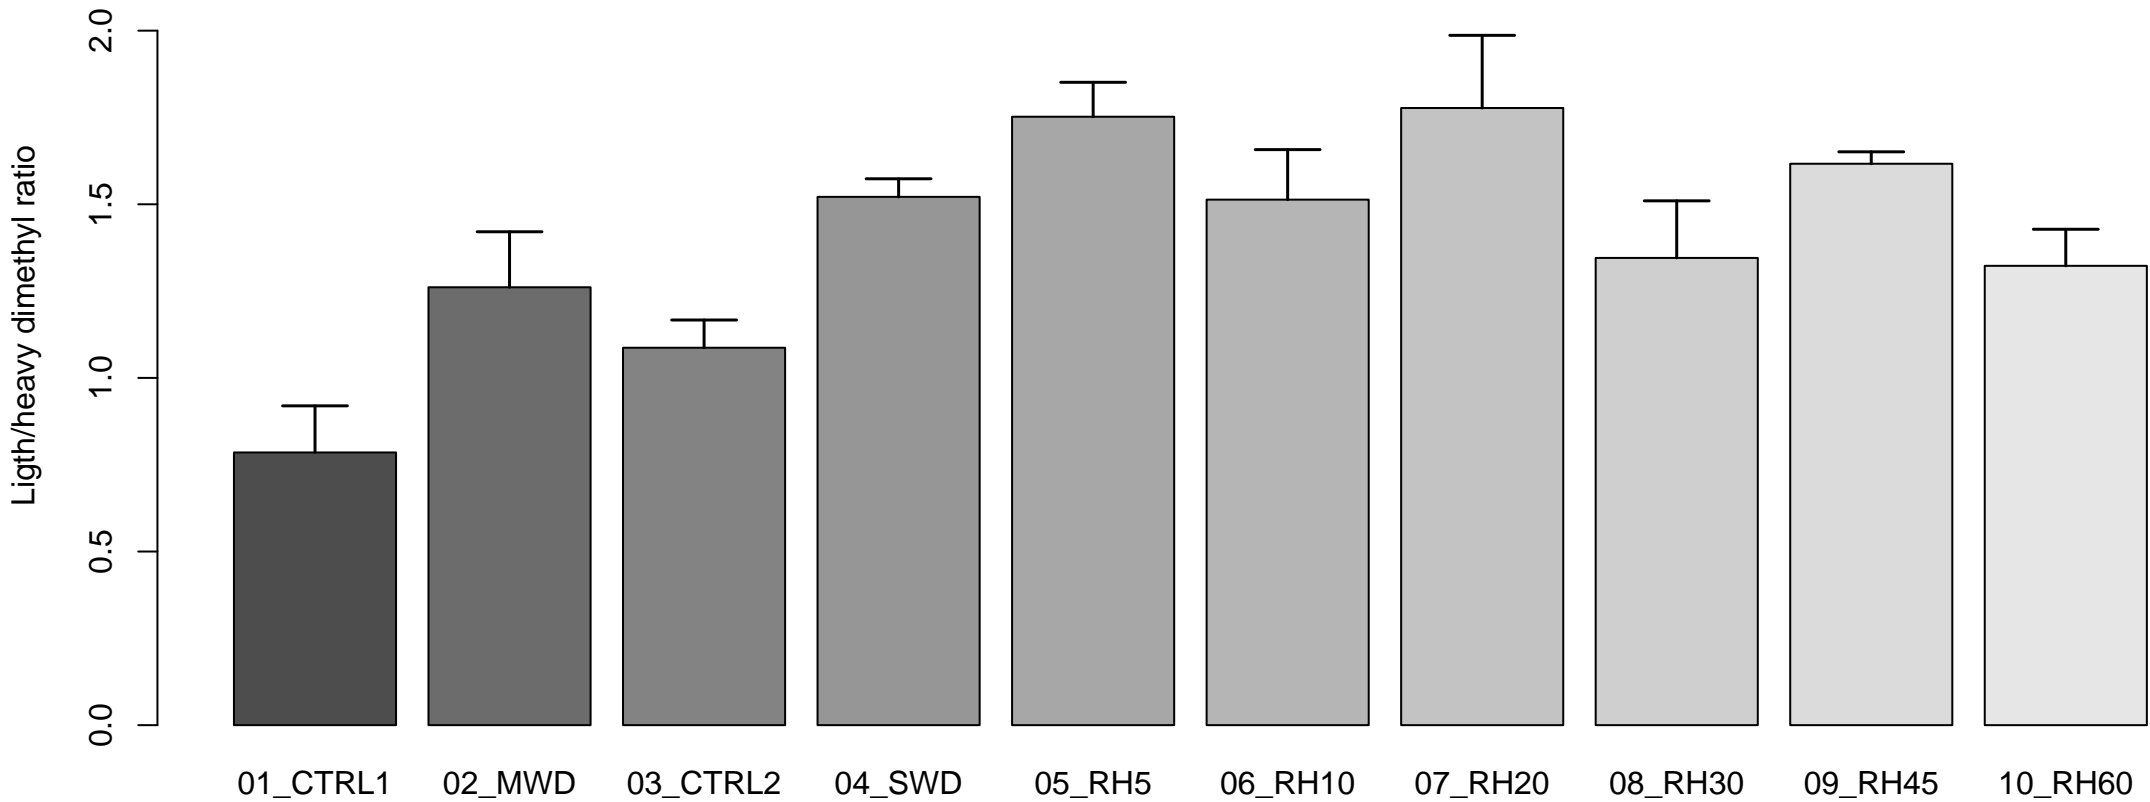

GRMZM2G406674\_P02

### USP family protein # S35

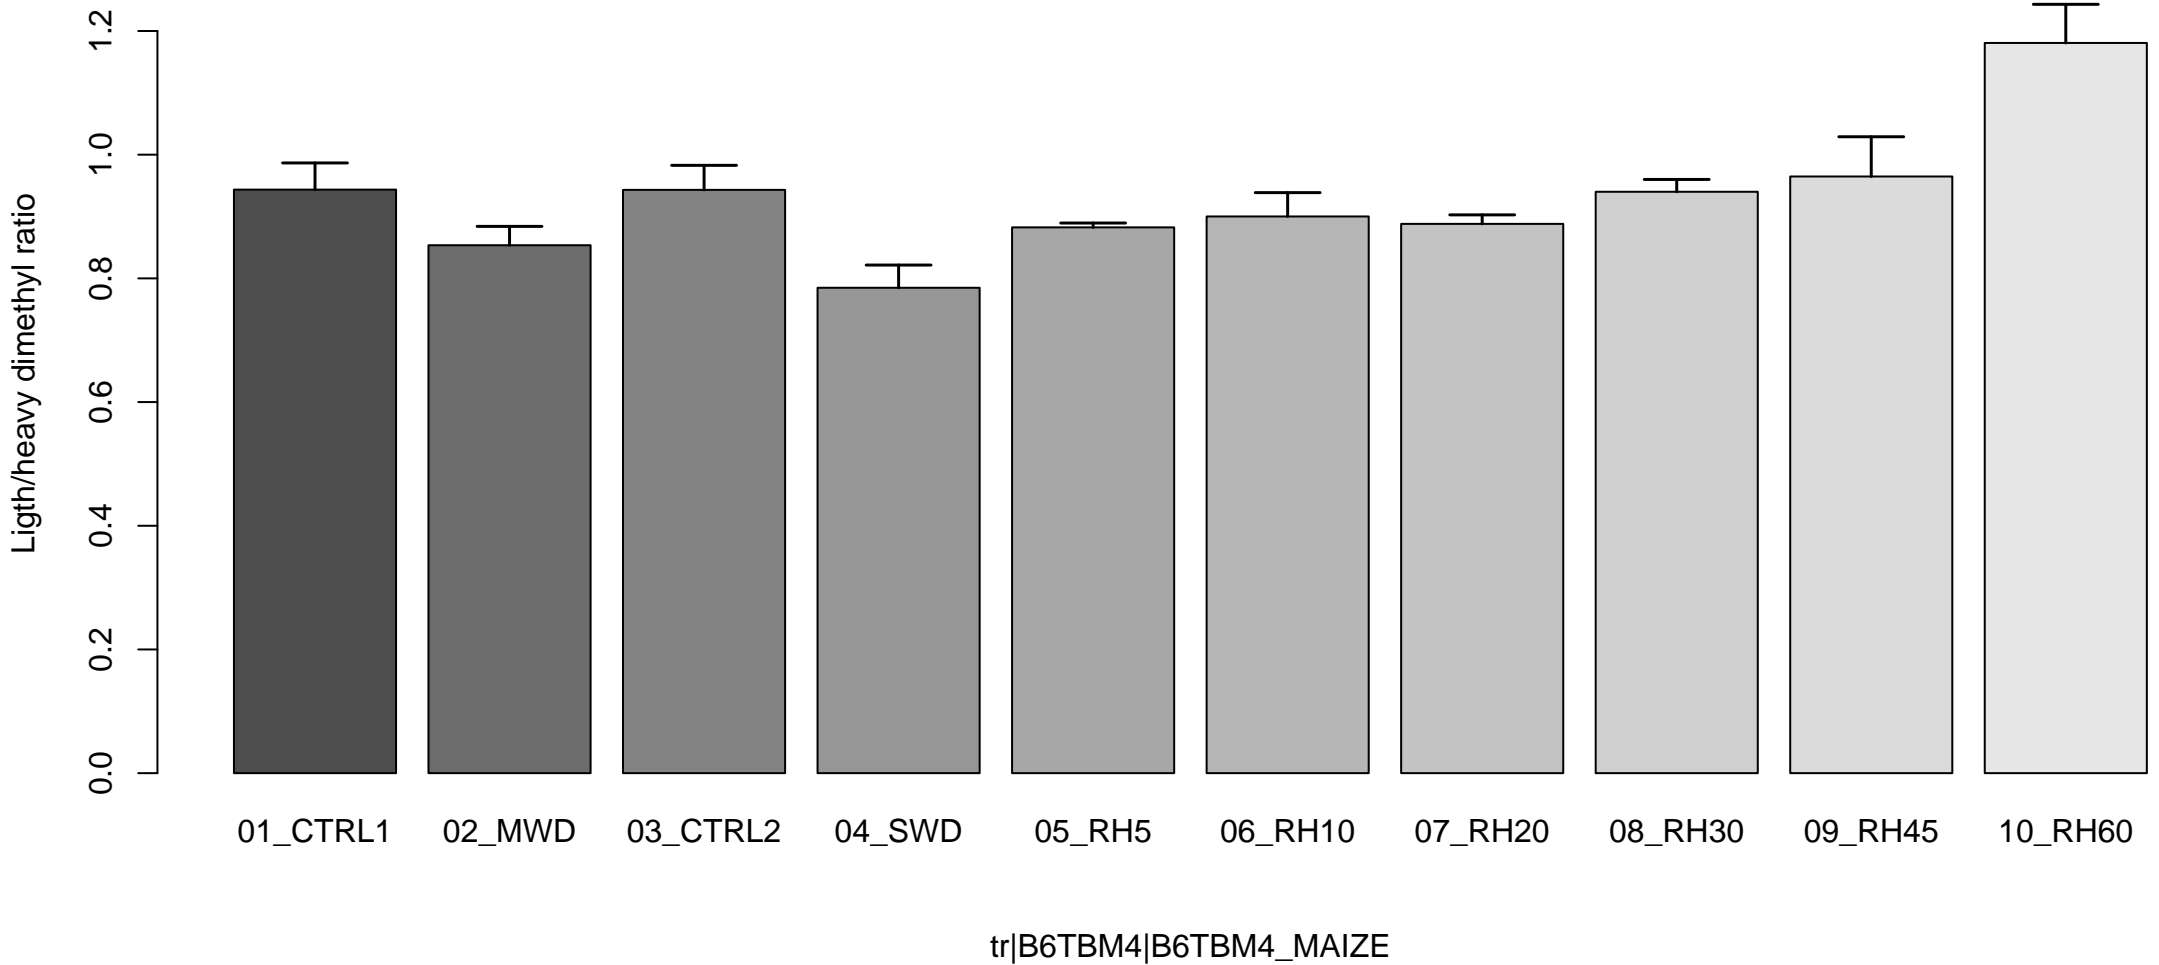

### USP family protein # S30

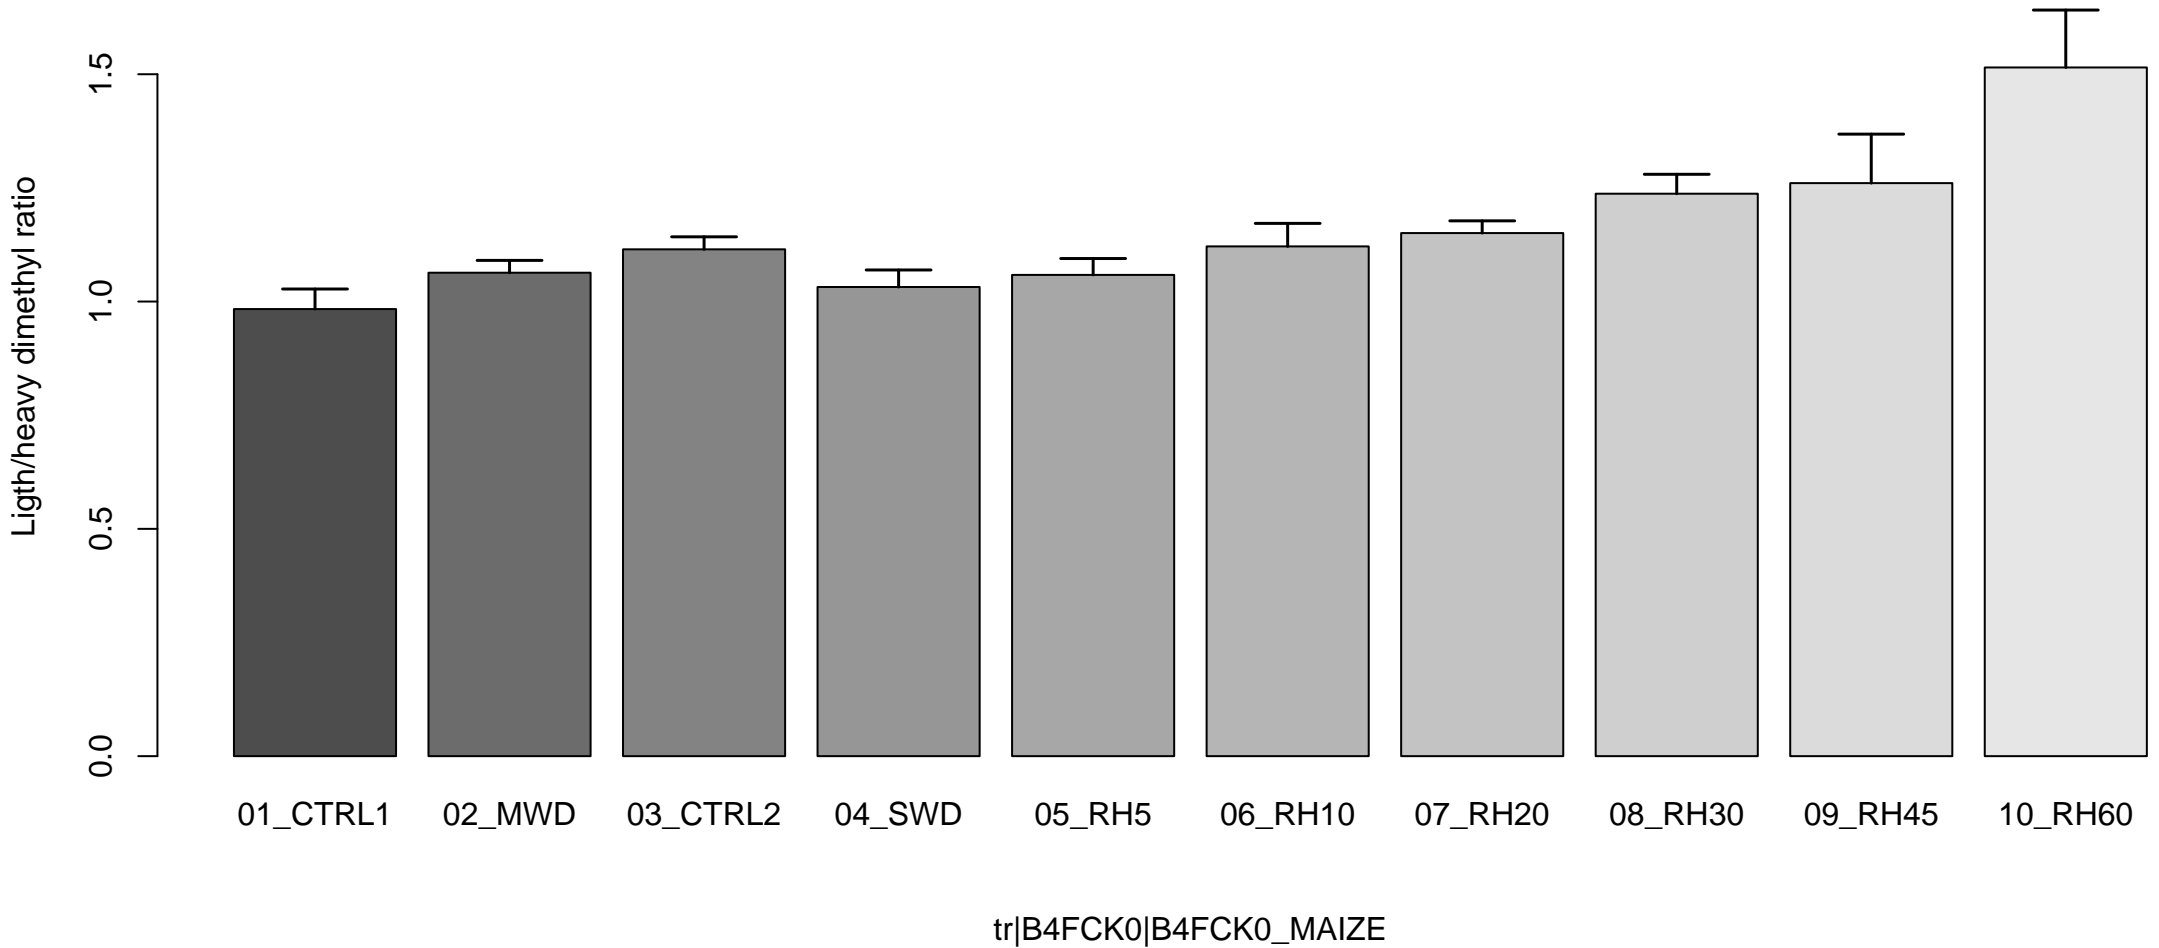



### Putative uncharacterized protein # T665

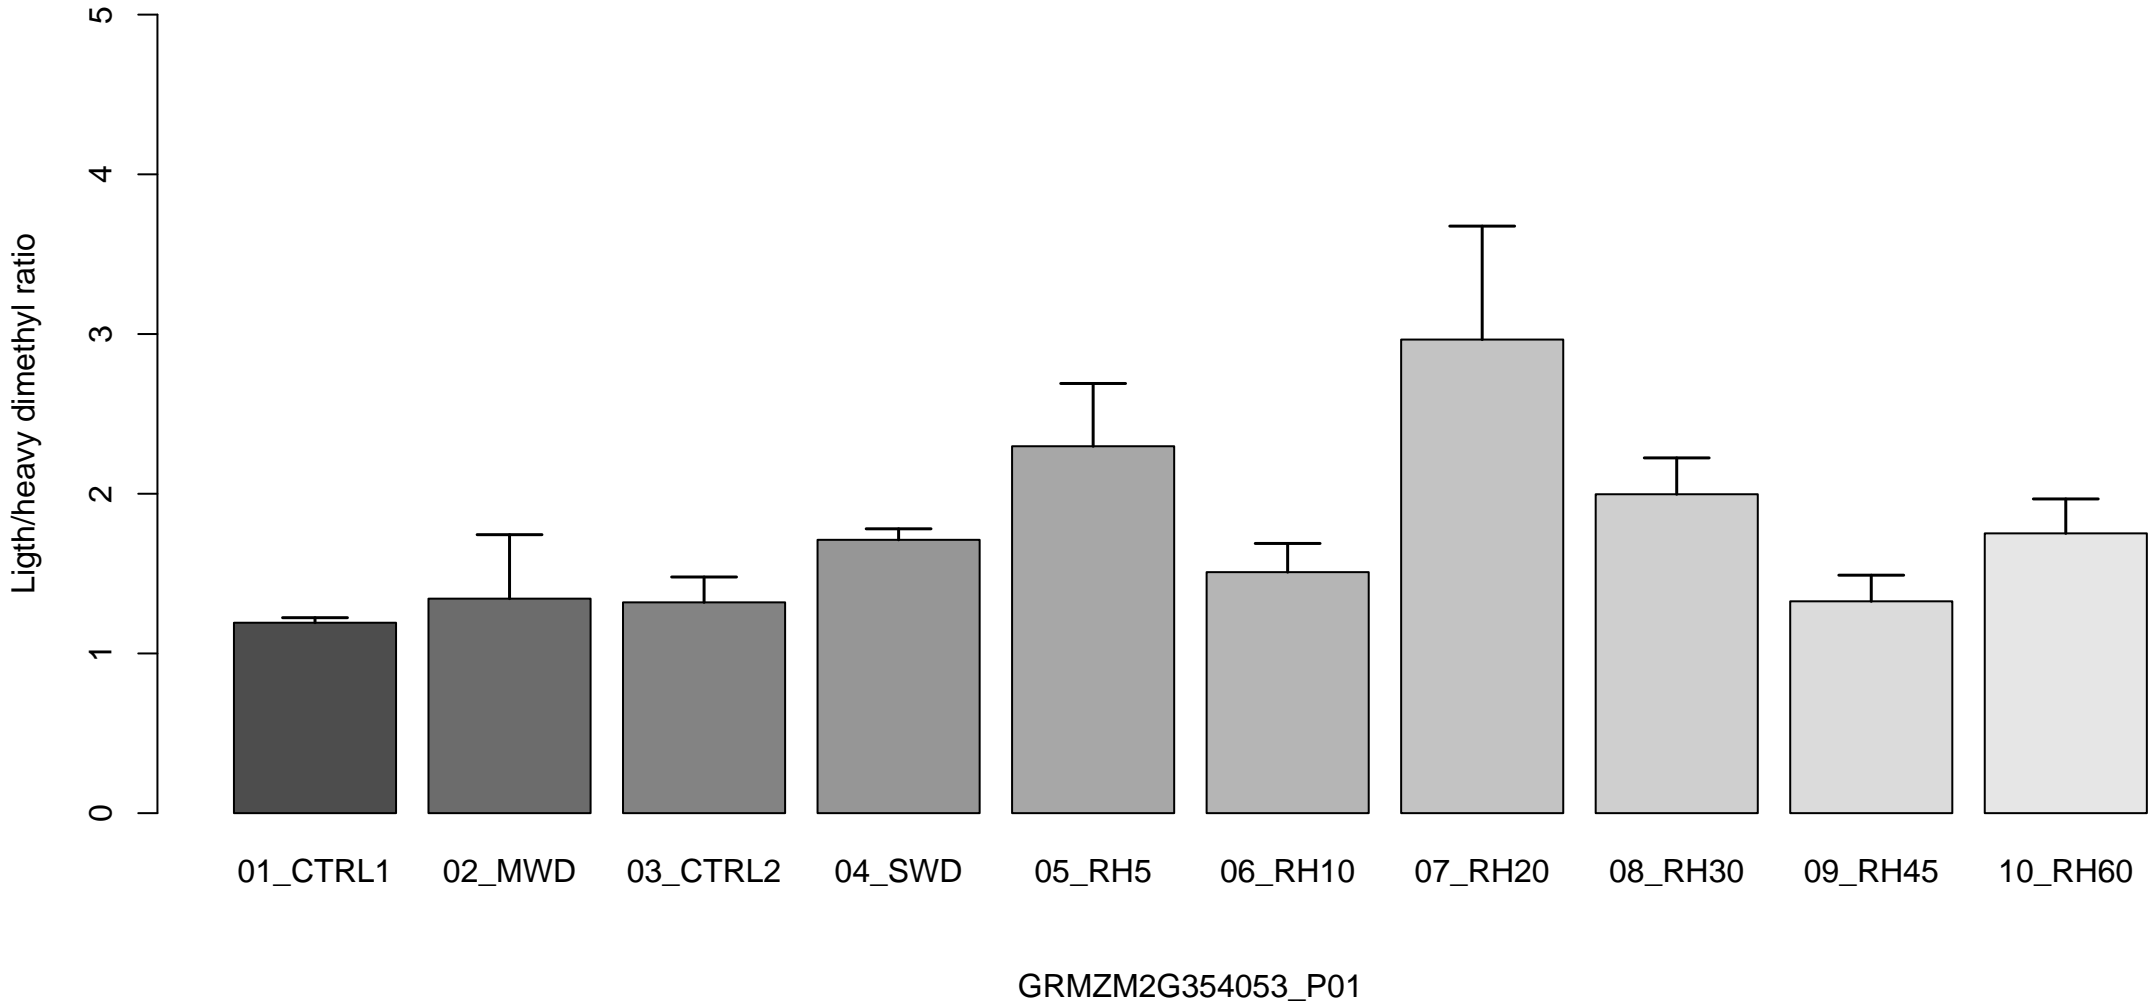

### Chlorophyll a/b-binding protein CP29 # T112

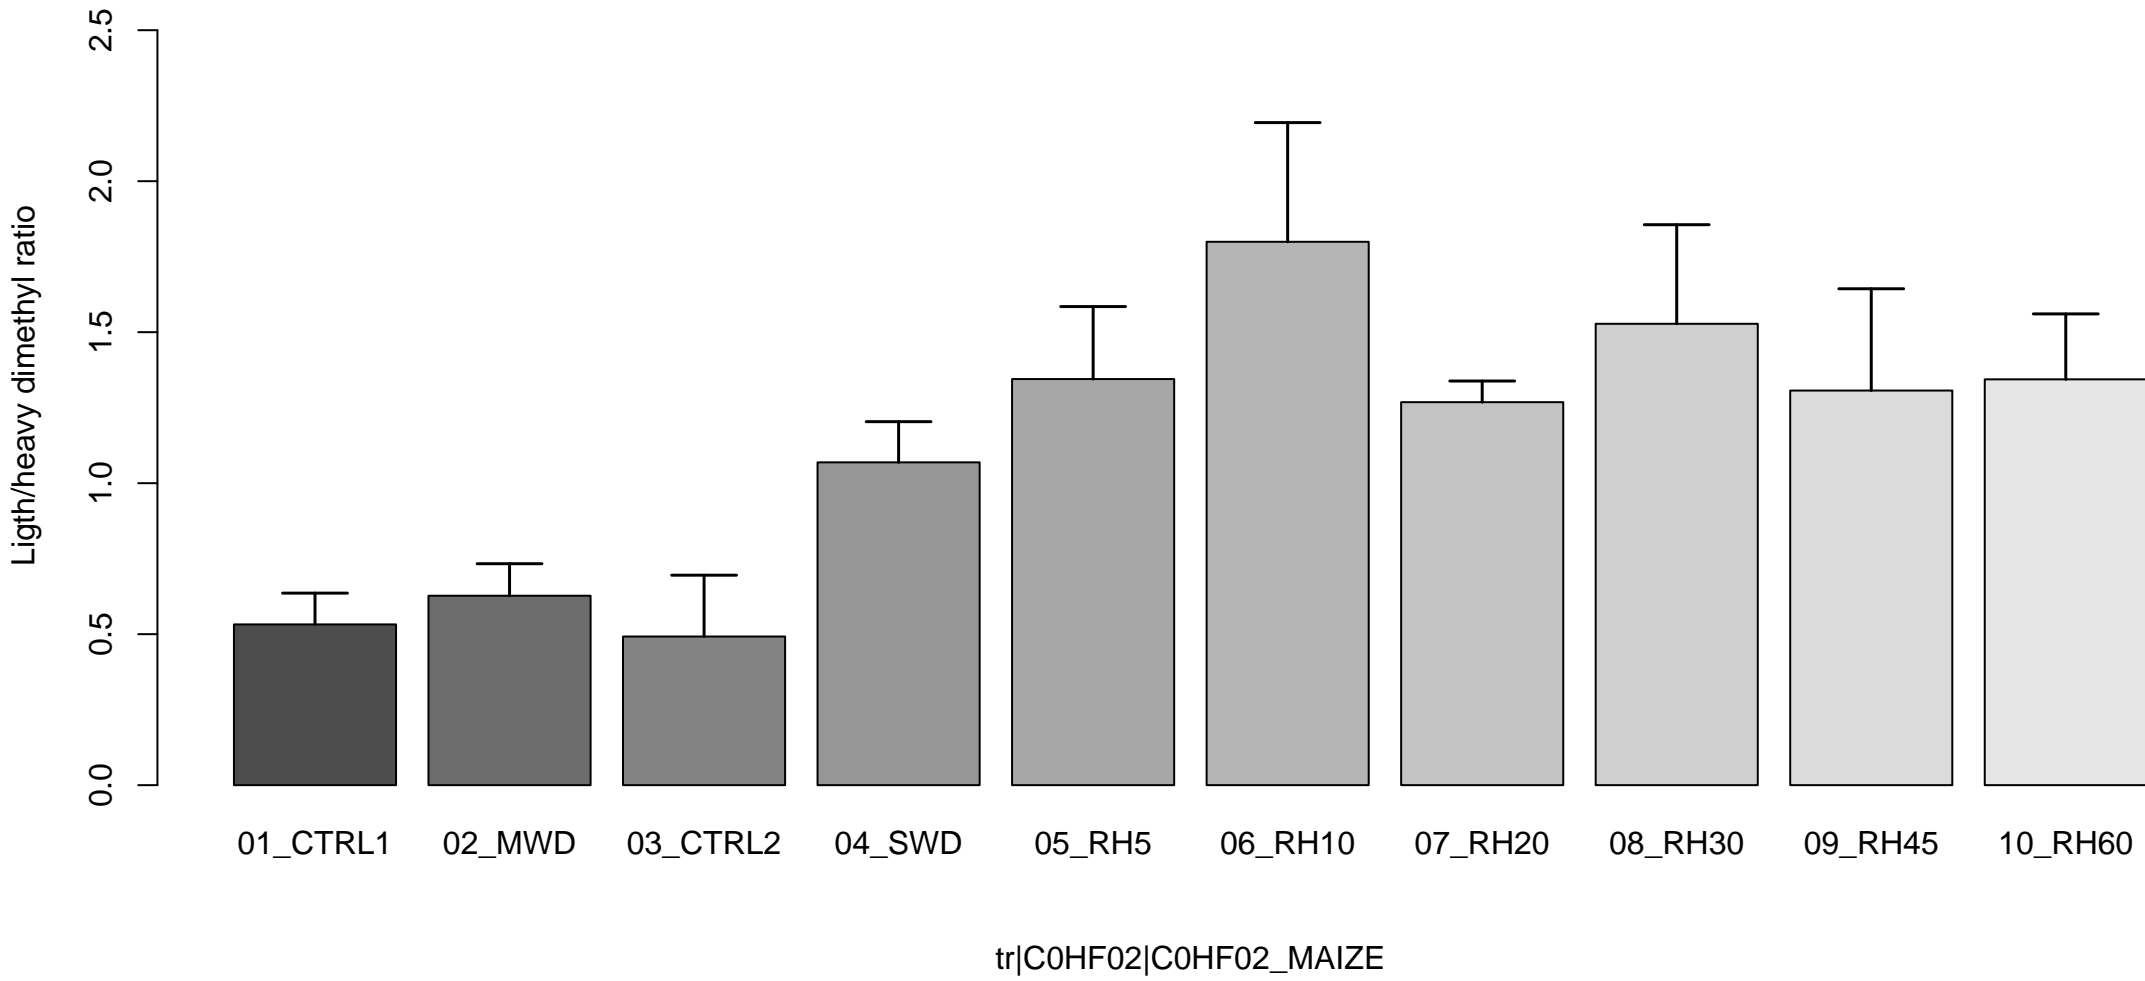

### Serine/threonine-protein kinase ctr1 # T433

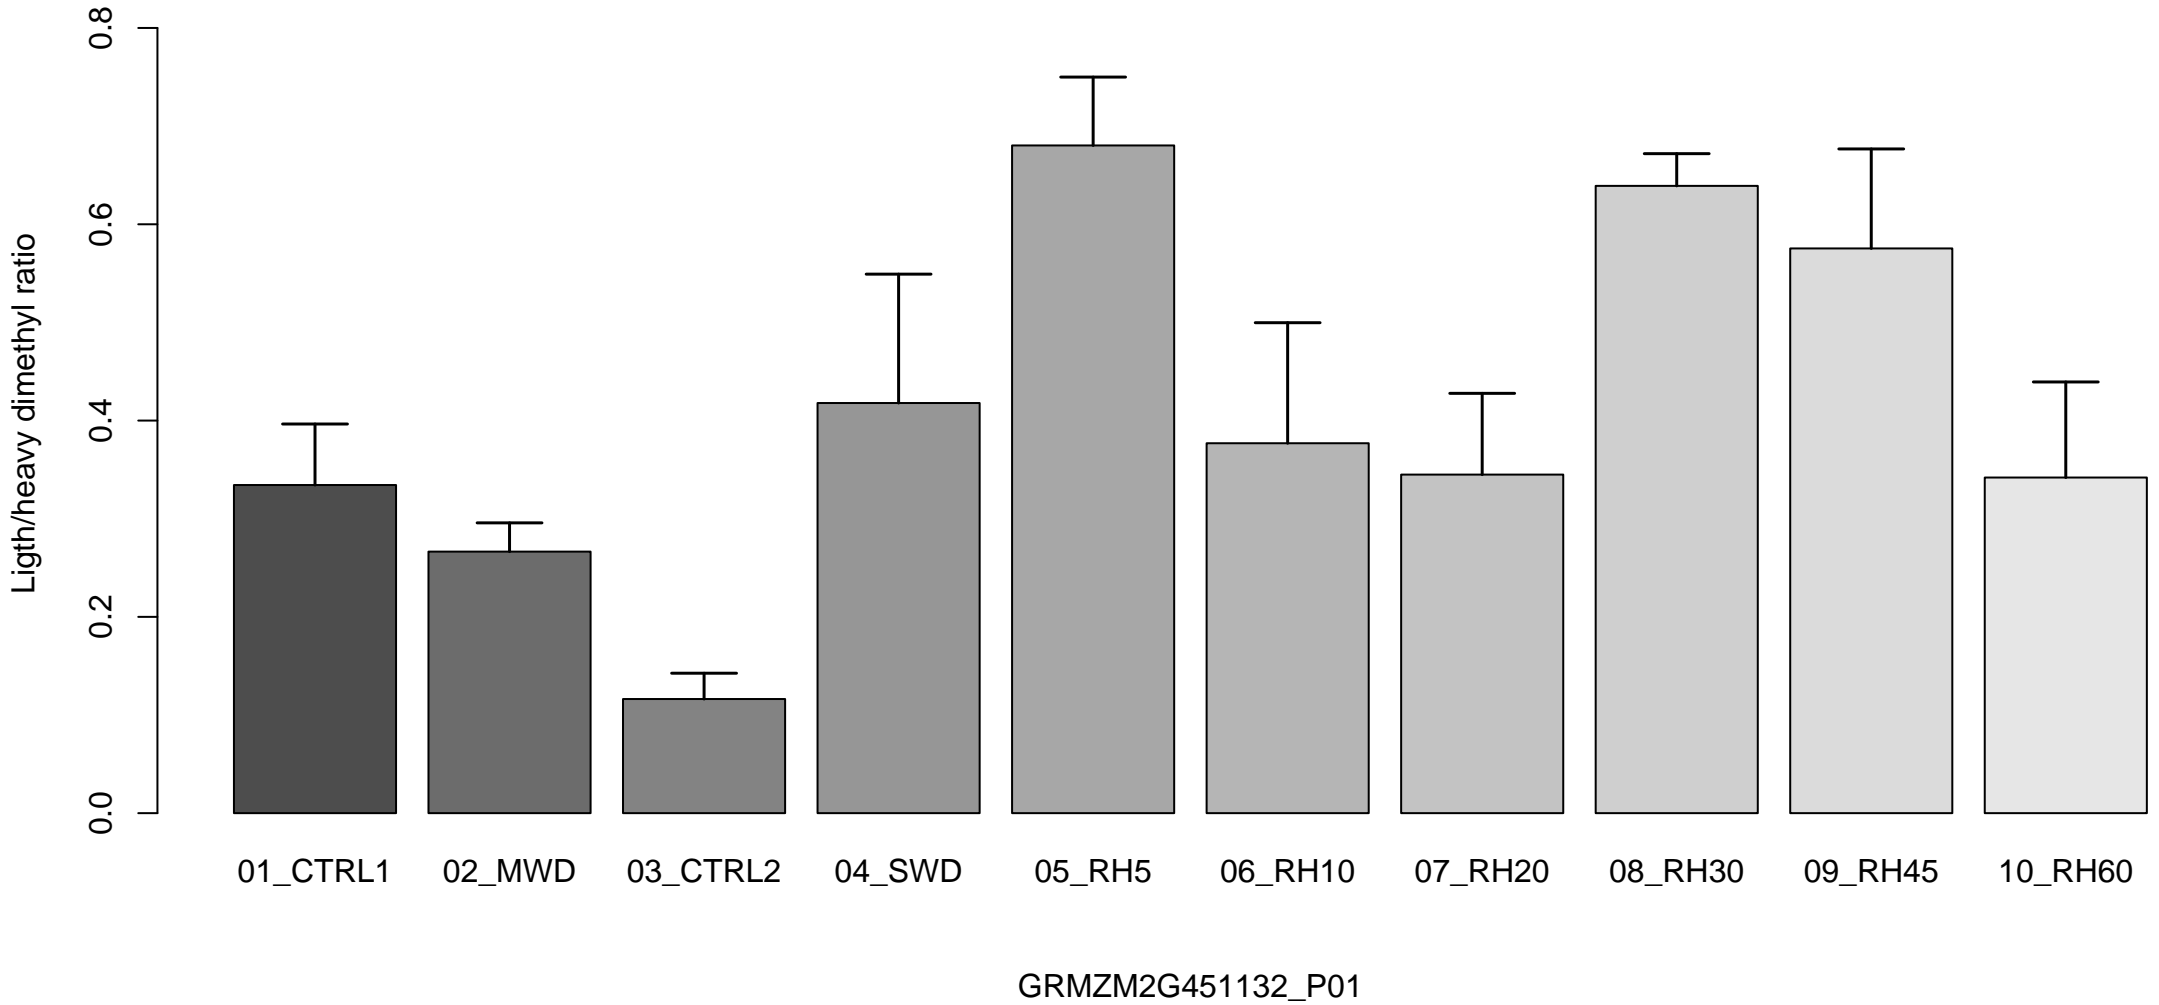

### Protein TIME FOR COFFEE # S1329

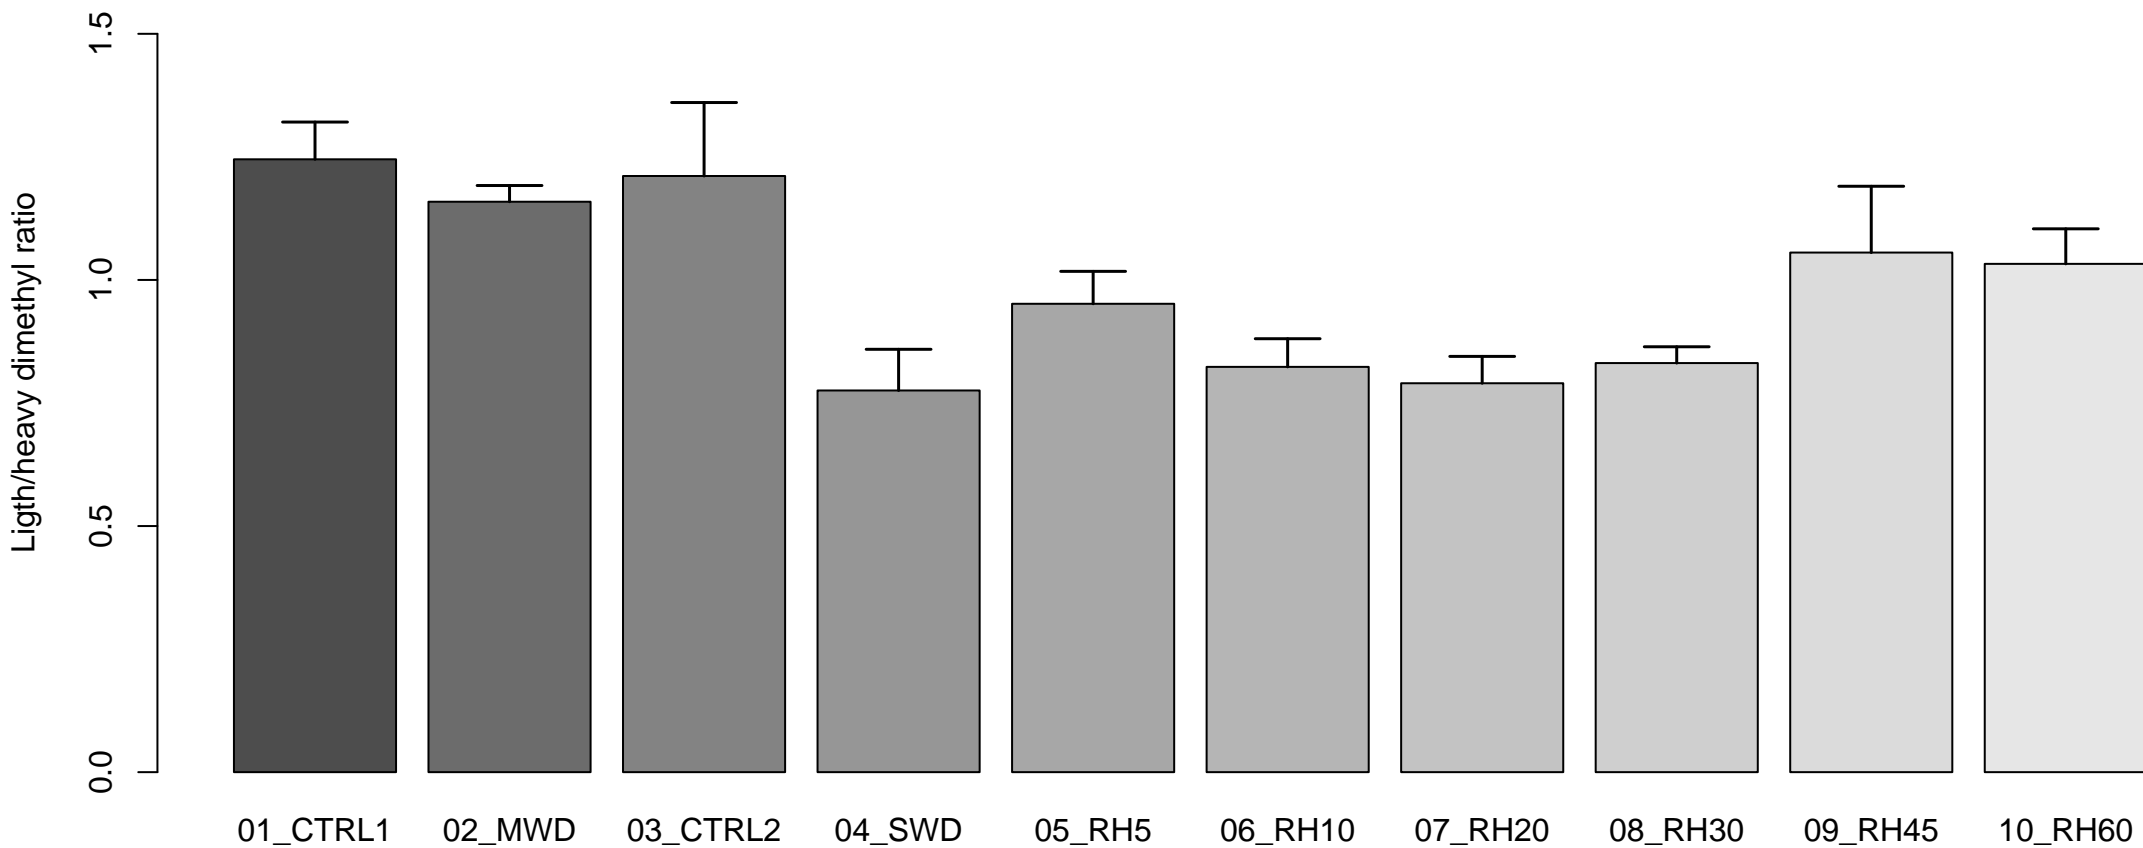

GRMZM2G360517\_P03

# Protein TIME FOR COFFEE # S1341

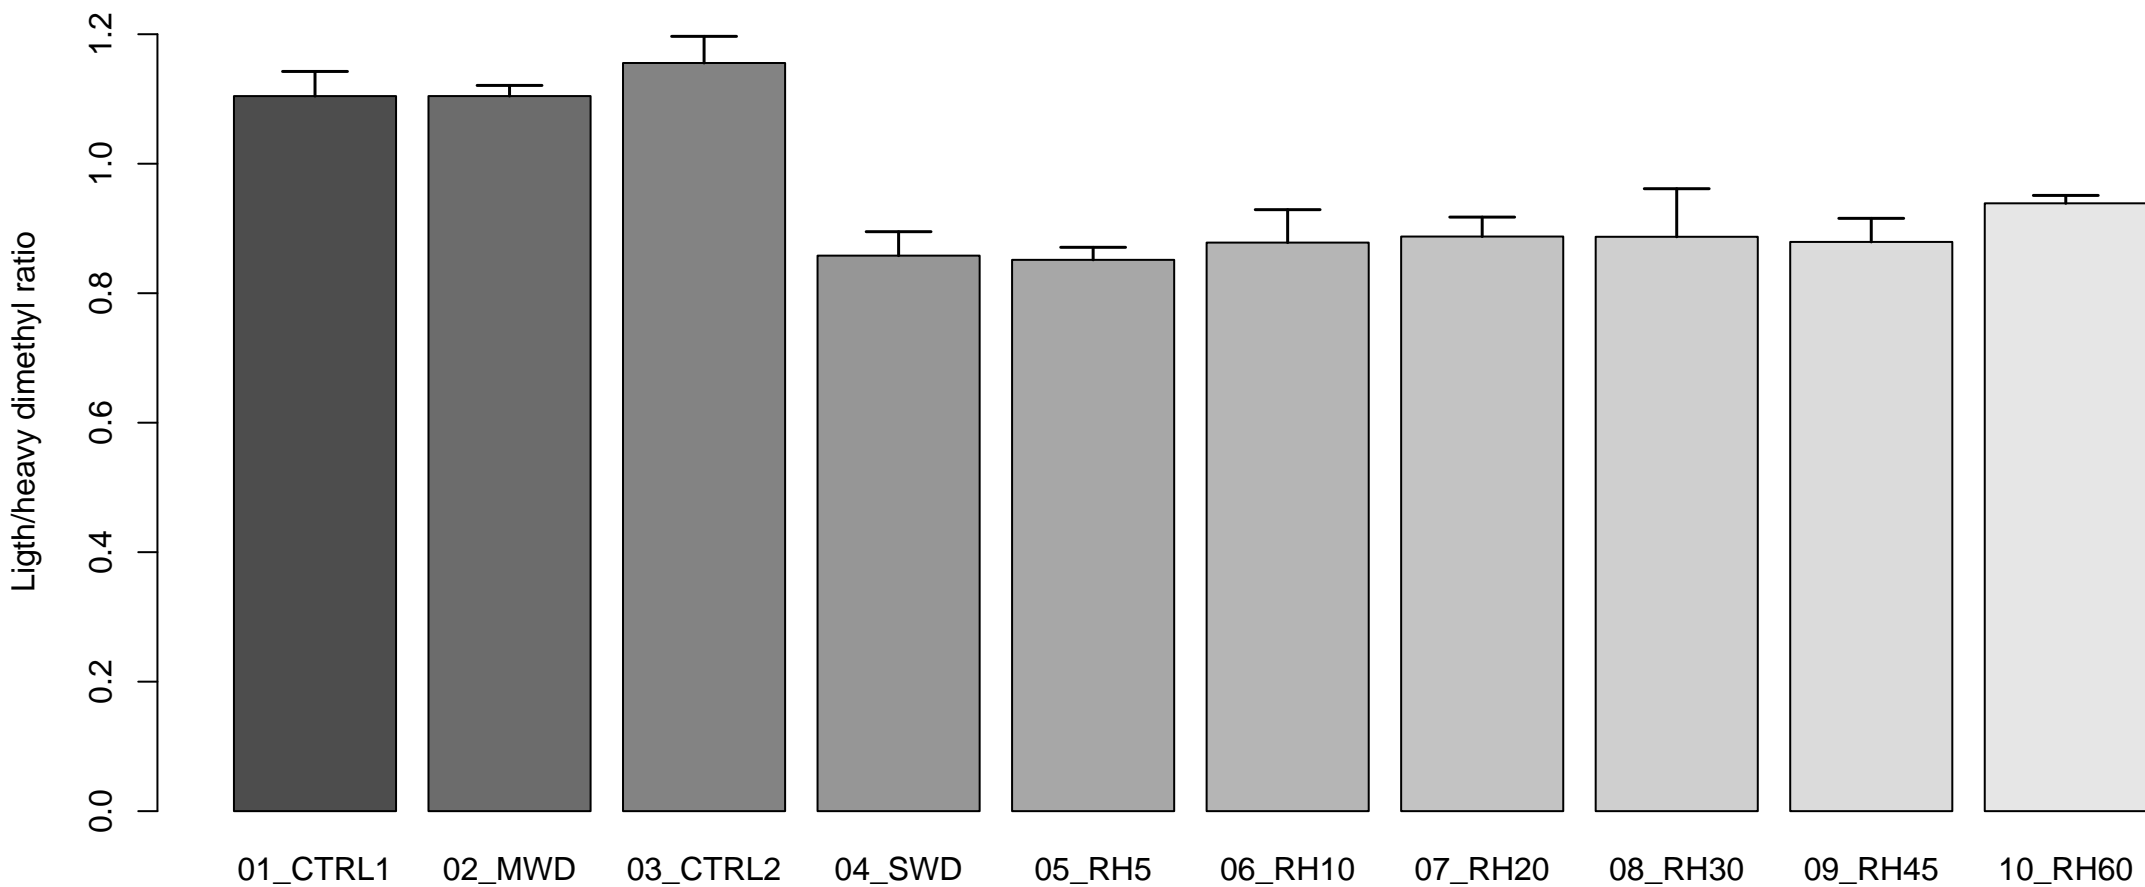

GRMZM2G360517\_P03

# DEAD-box ATP-dependent RNA helicase 52C # T71/S76

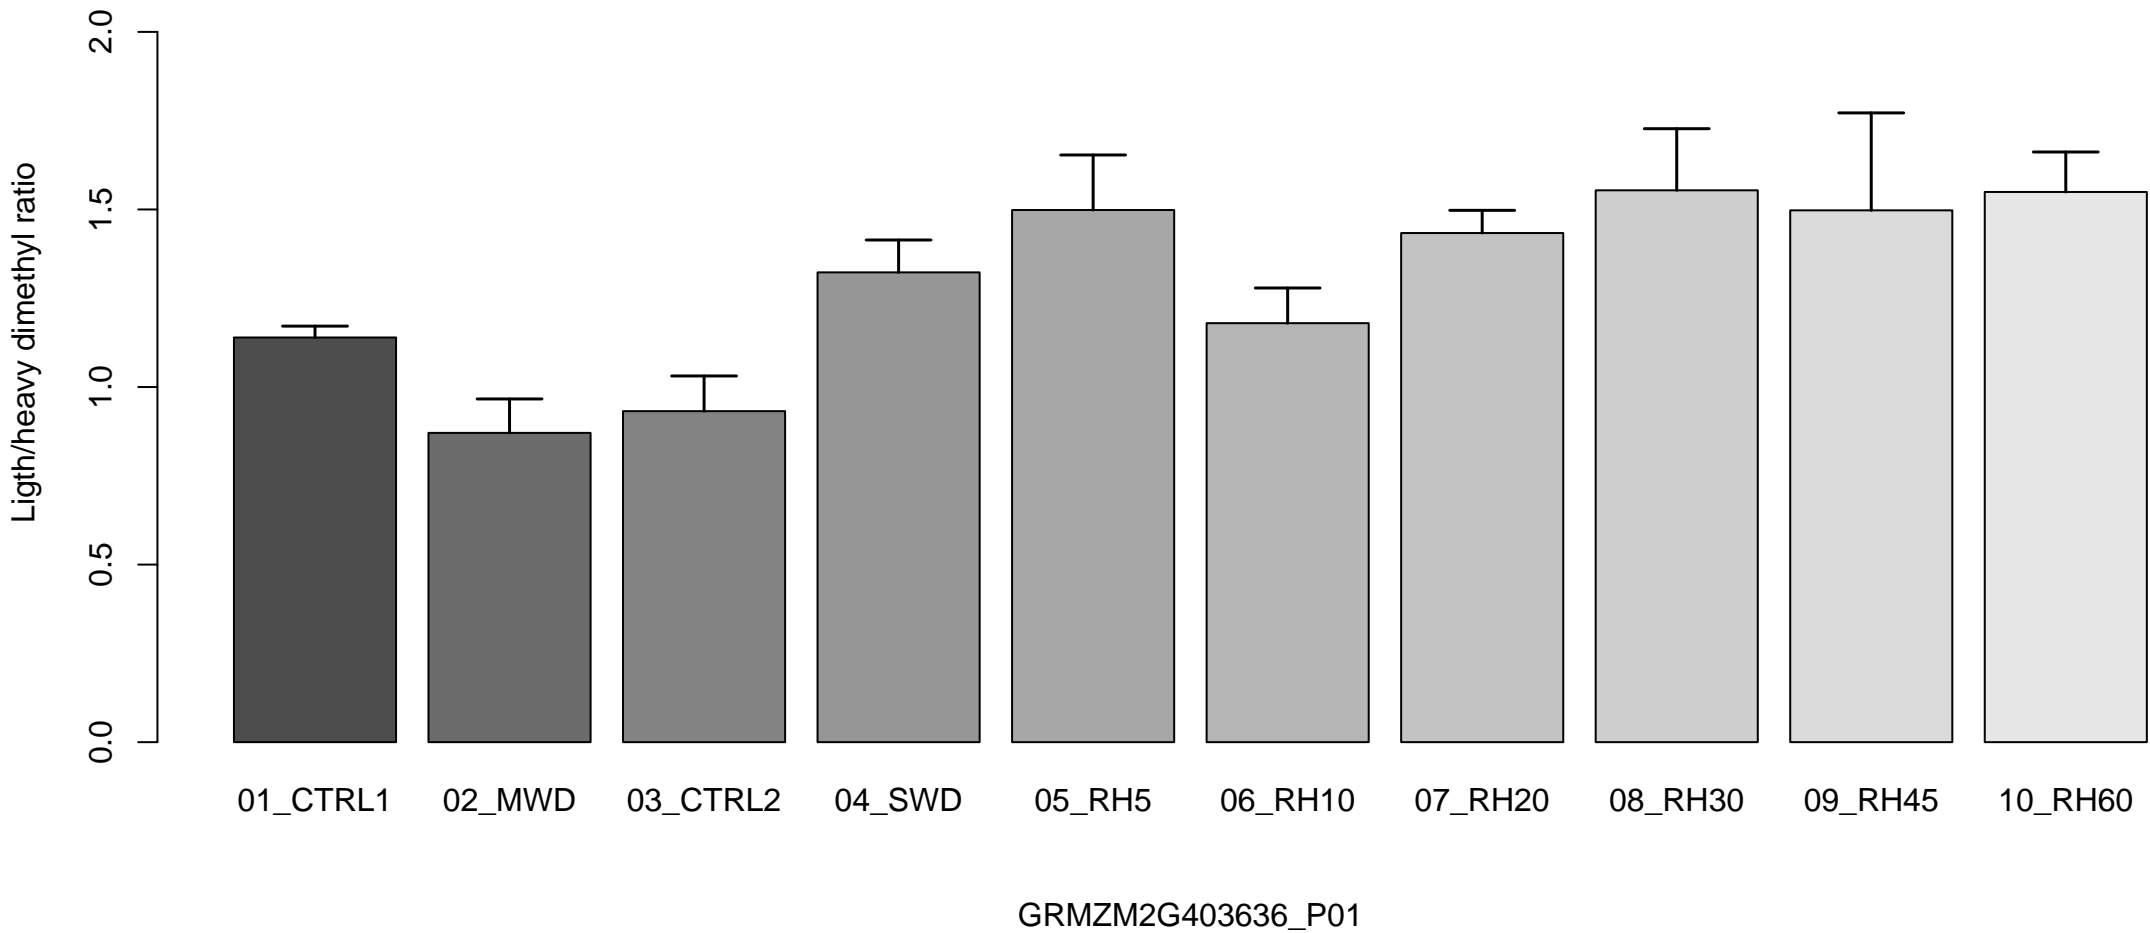

### Putative uncharacterized protein # S89/Y90/S91

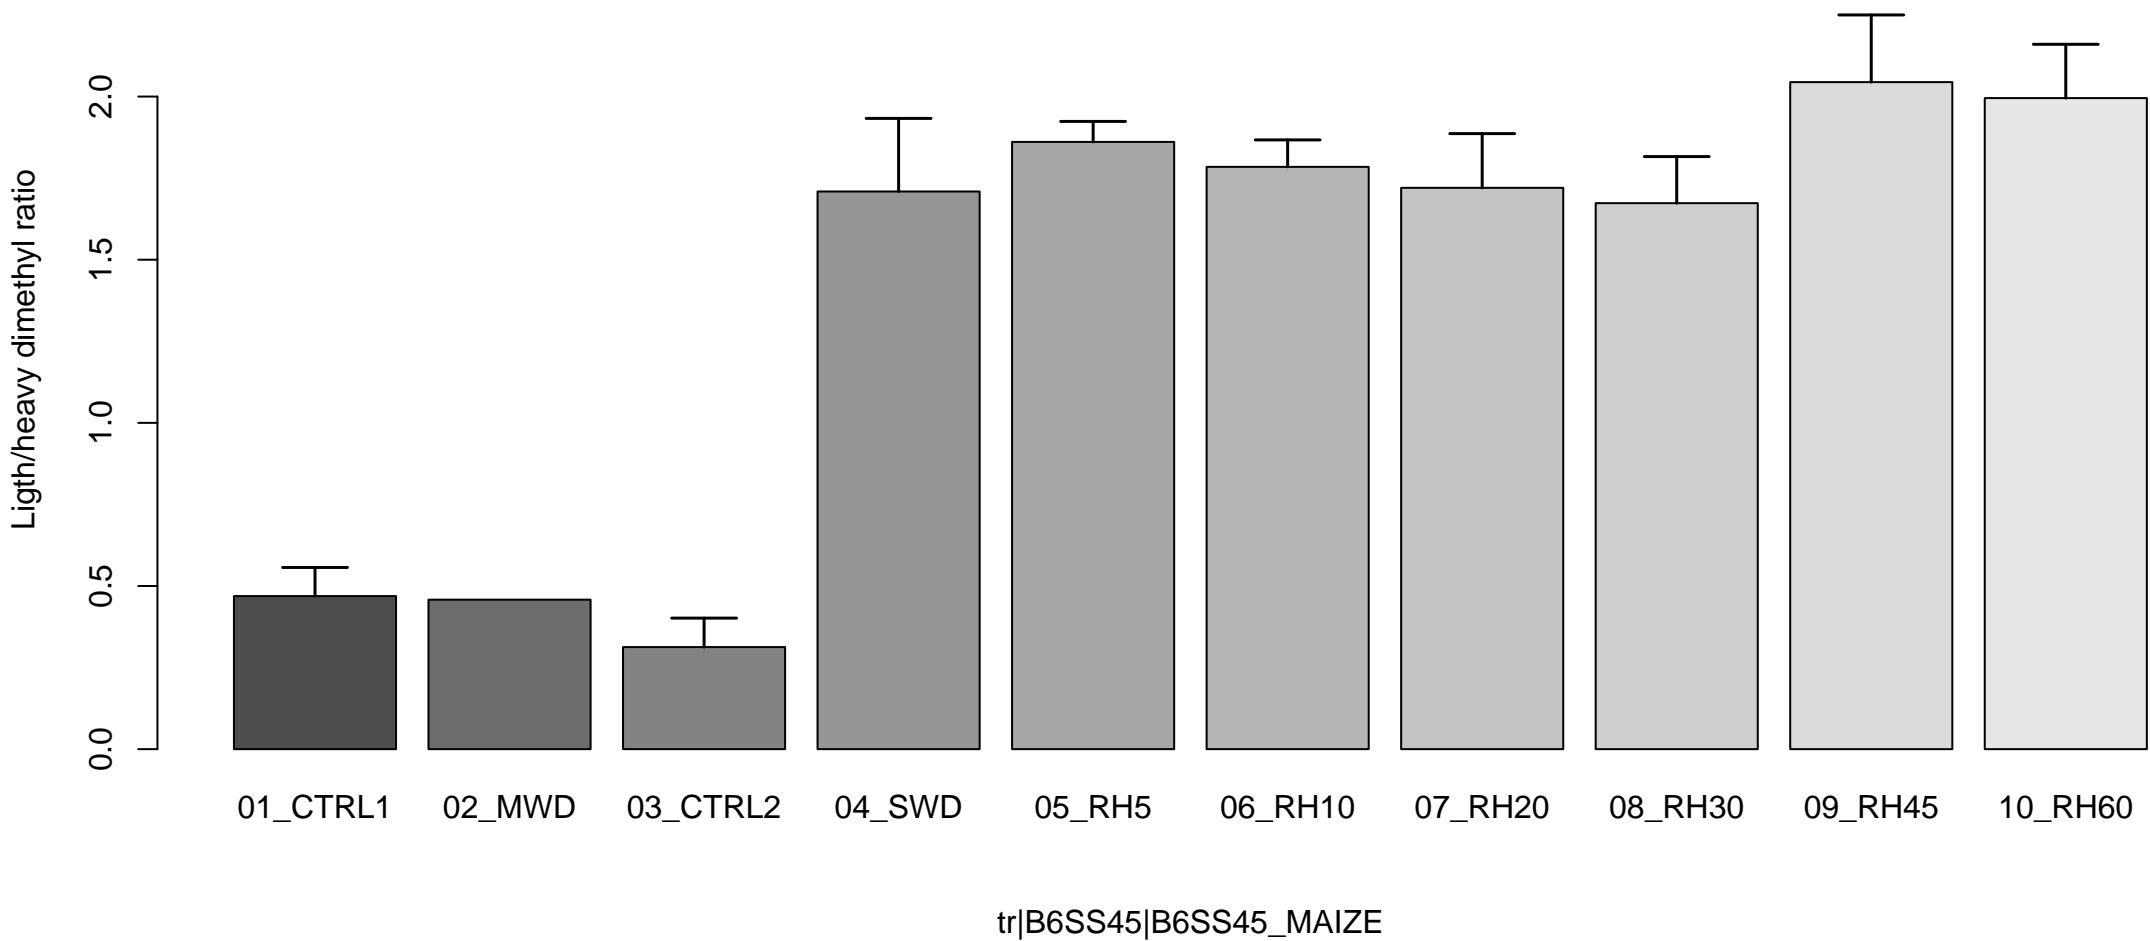

### Putative uncharacterized protein # S68

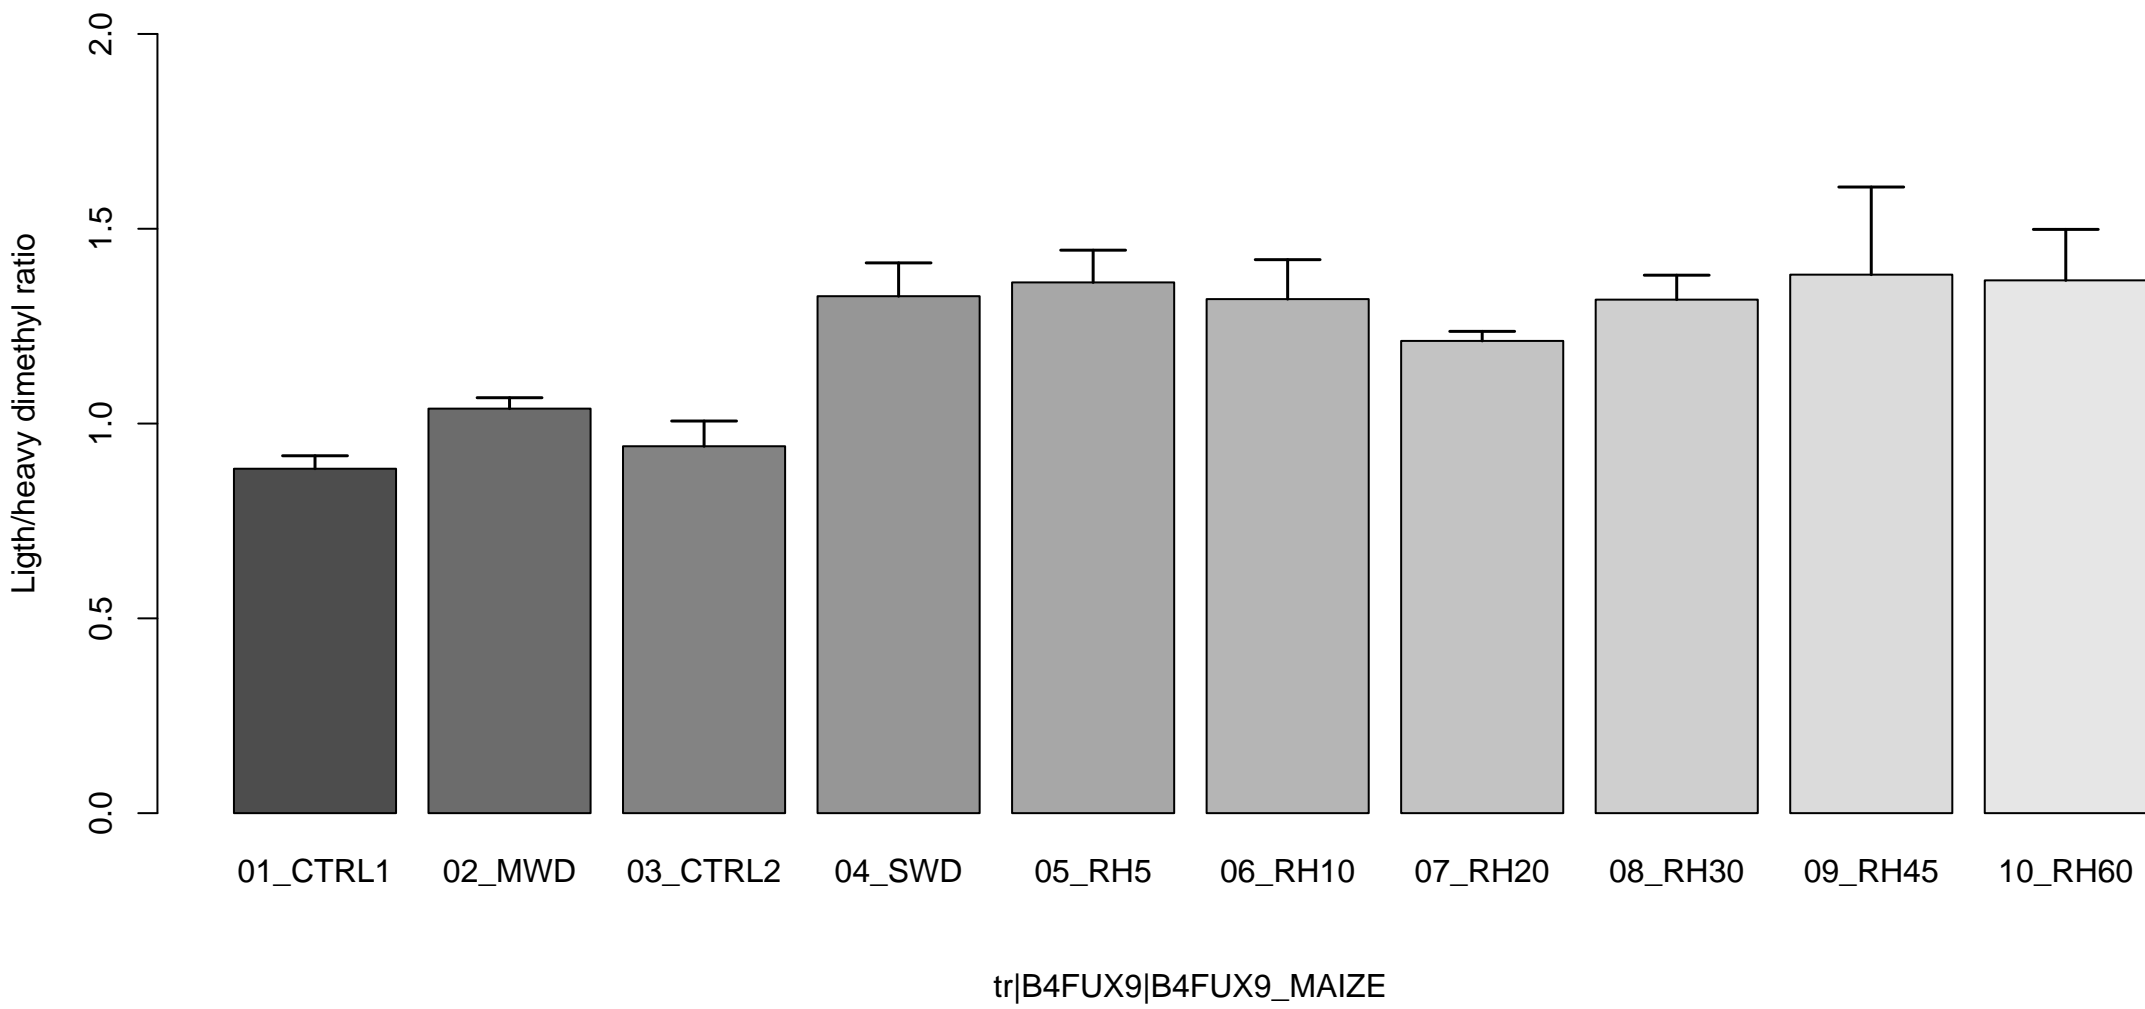



### Histone deacetylase 2b # S101

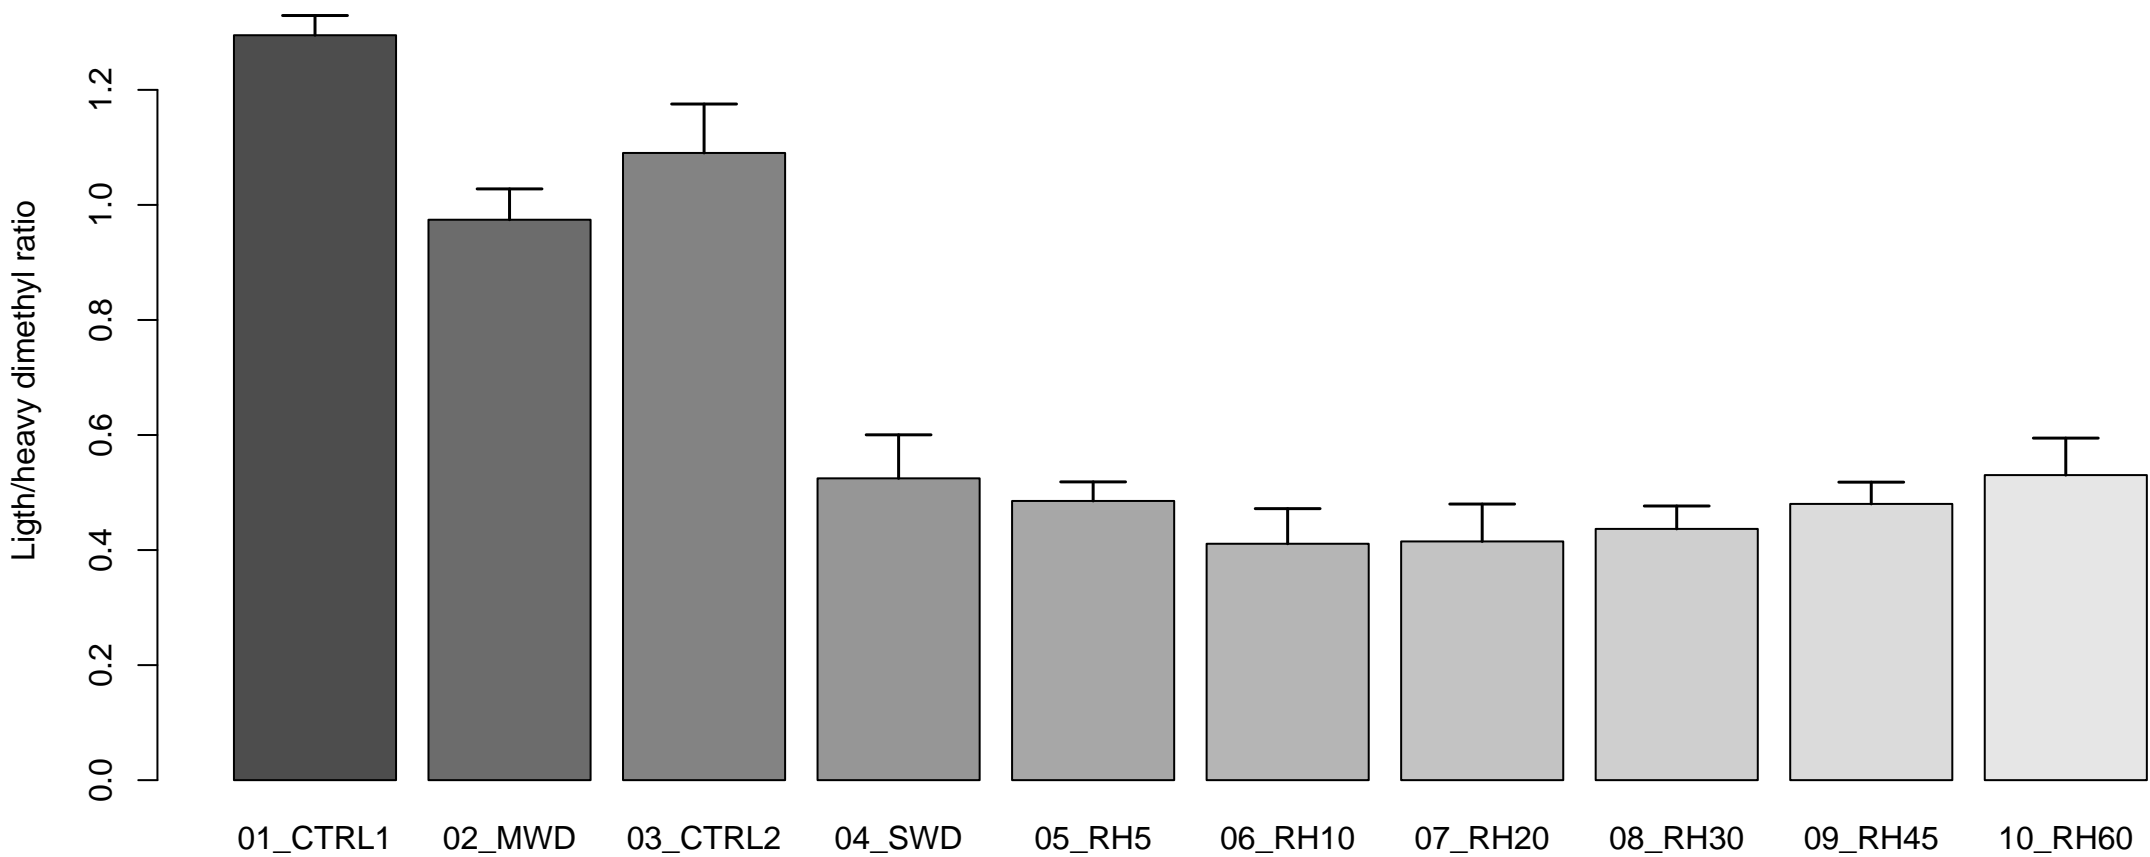

GRMZM2G159032\_P04

### Putative uncharacterized protein # S50

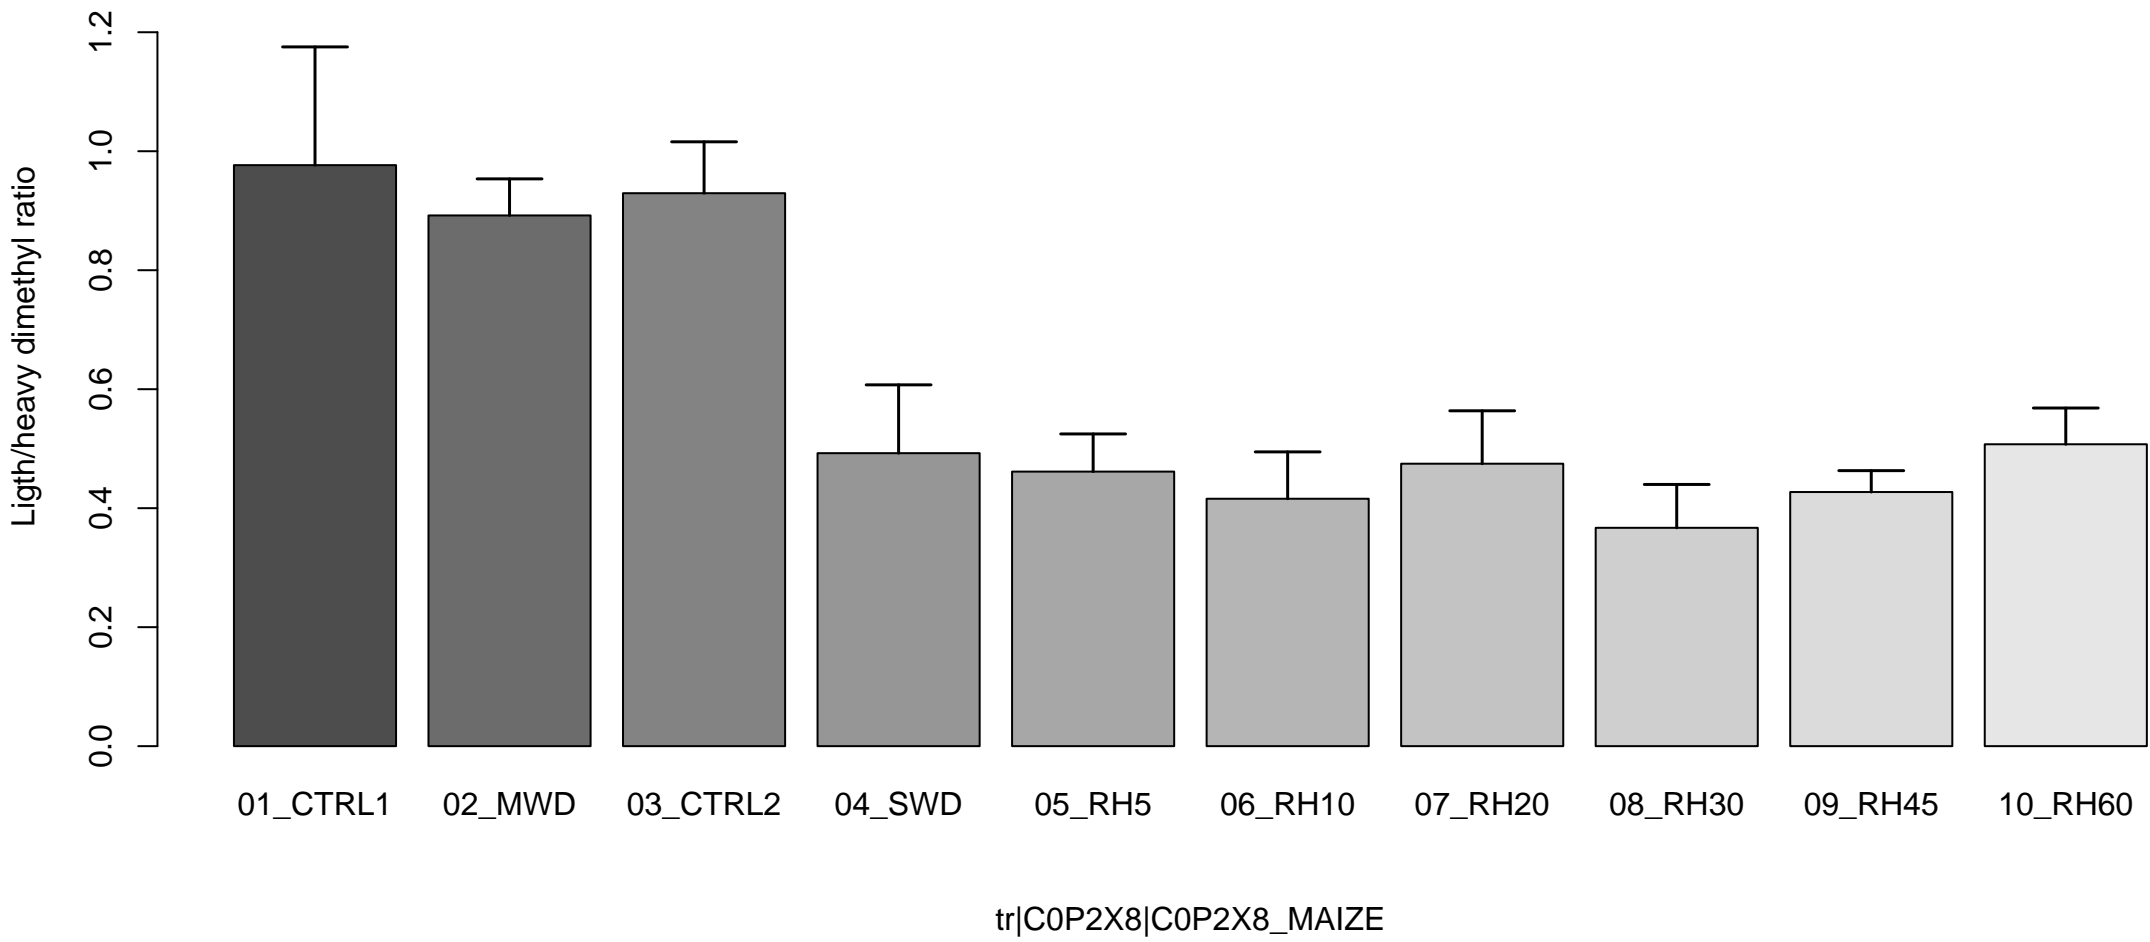

### Salt-inducible protein kinase # S431

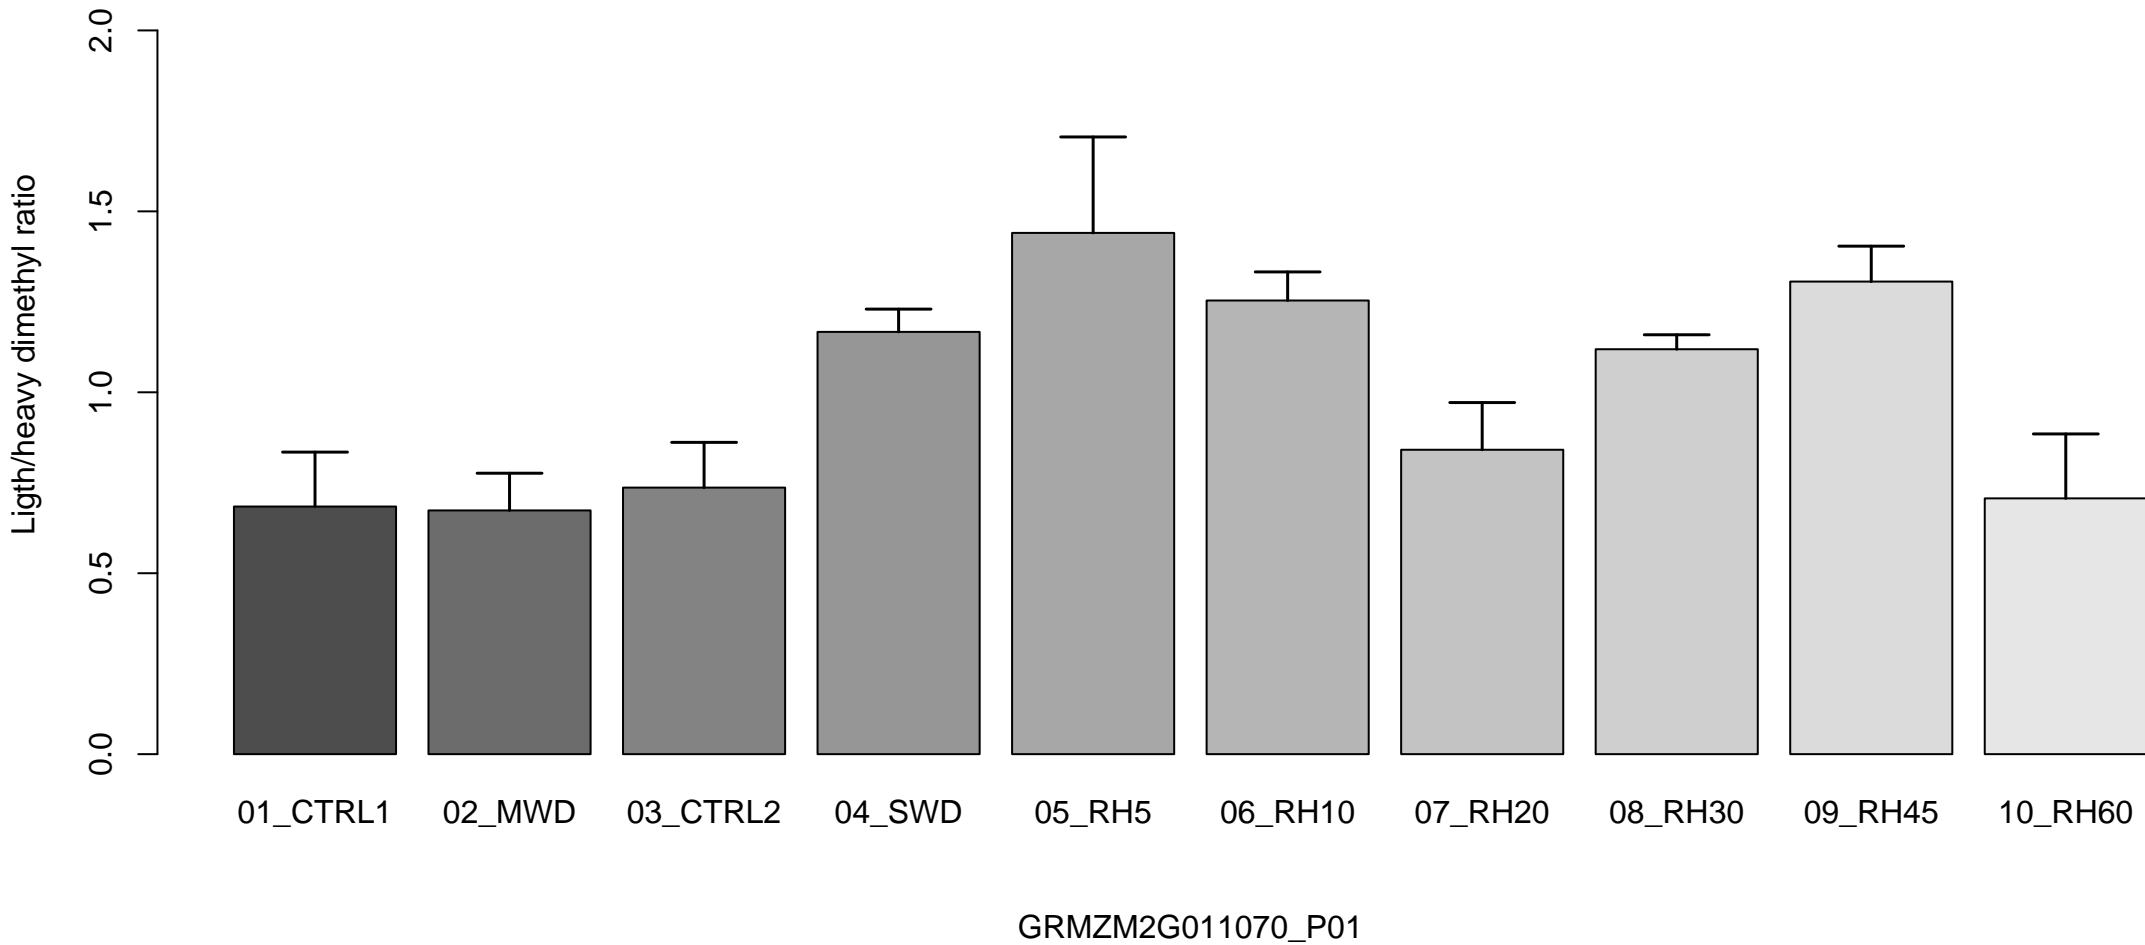

### Sucrose synthase 3 # T846

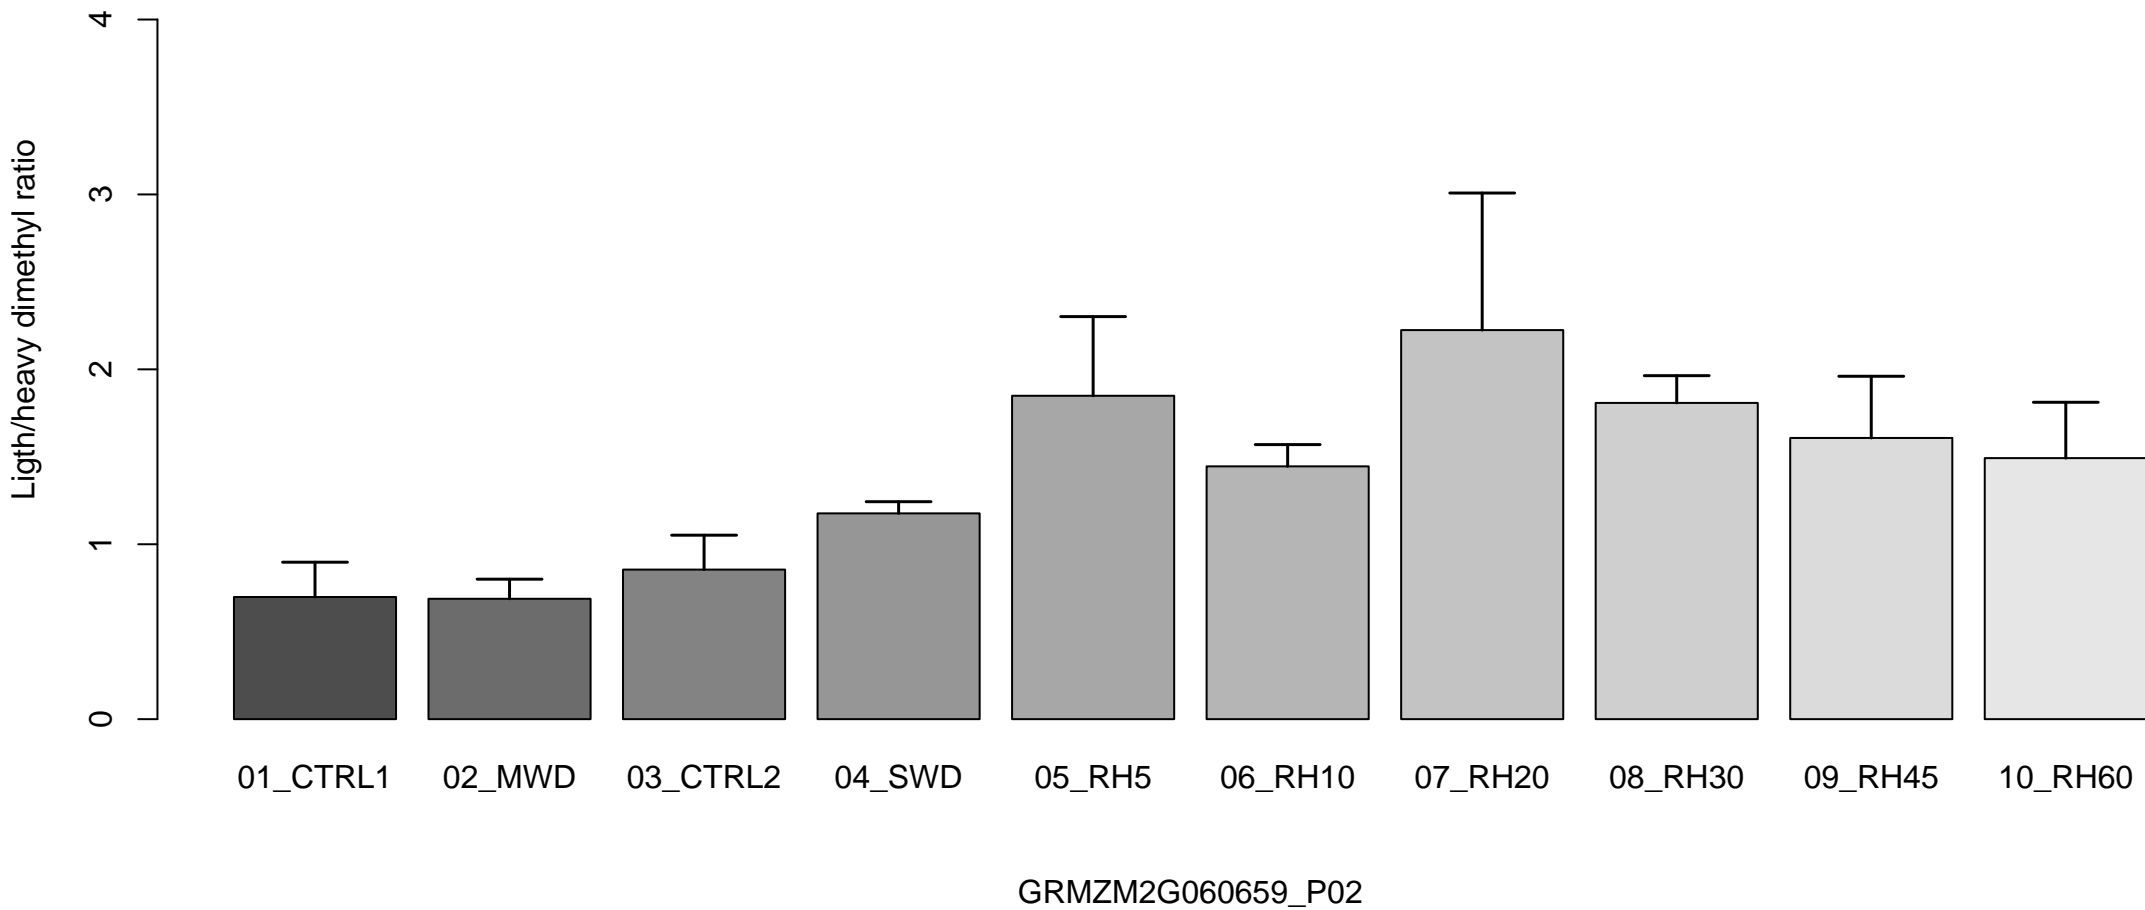

### Protein DEK, putative # S115

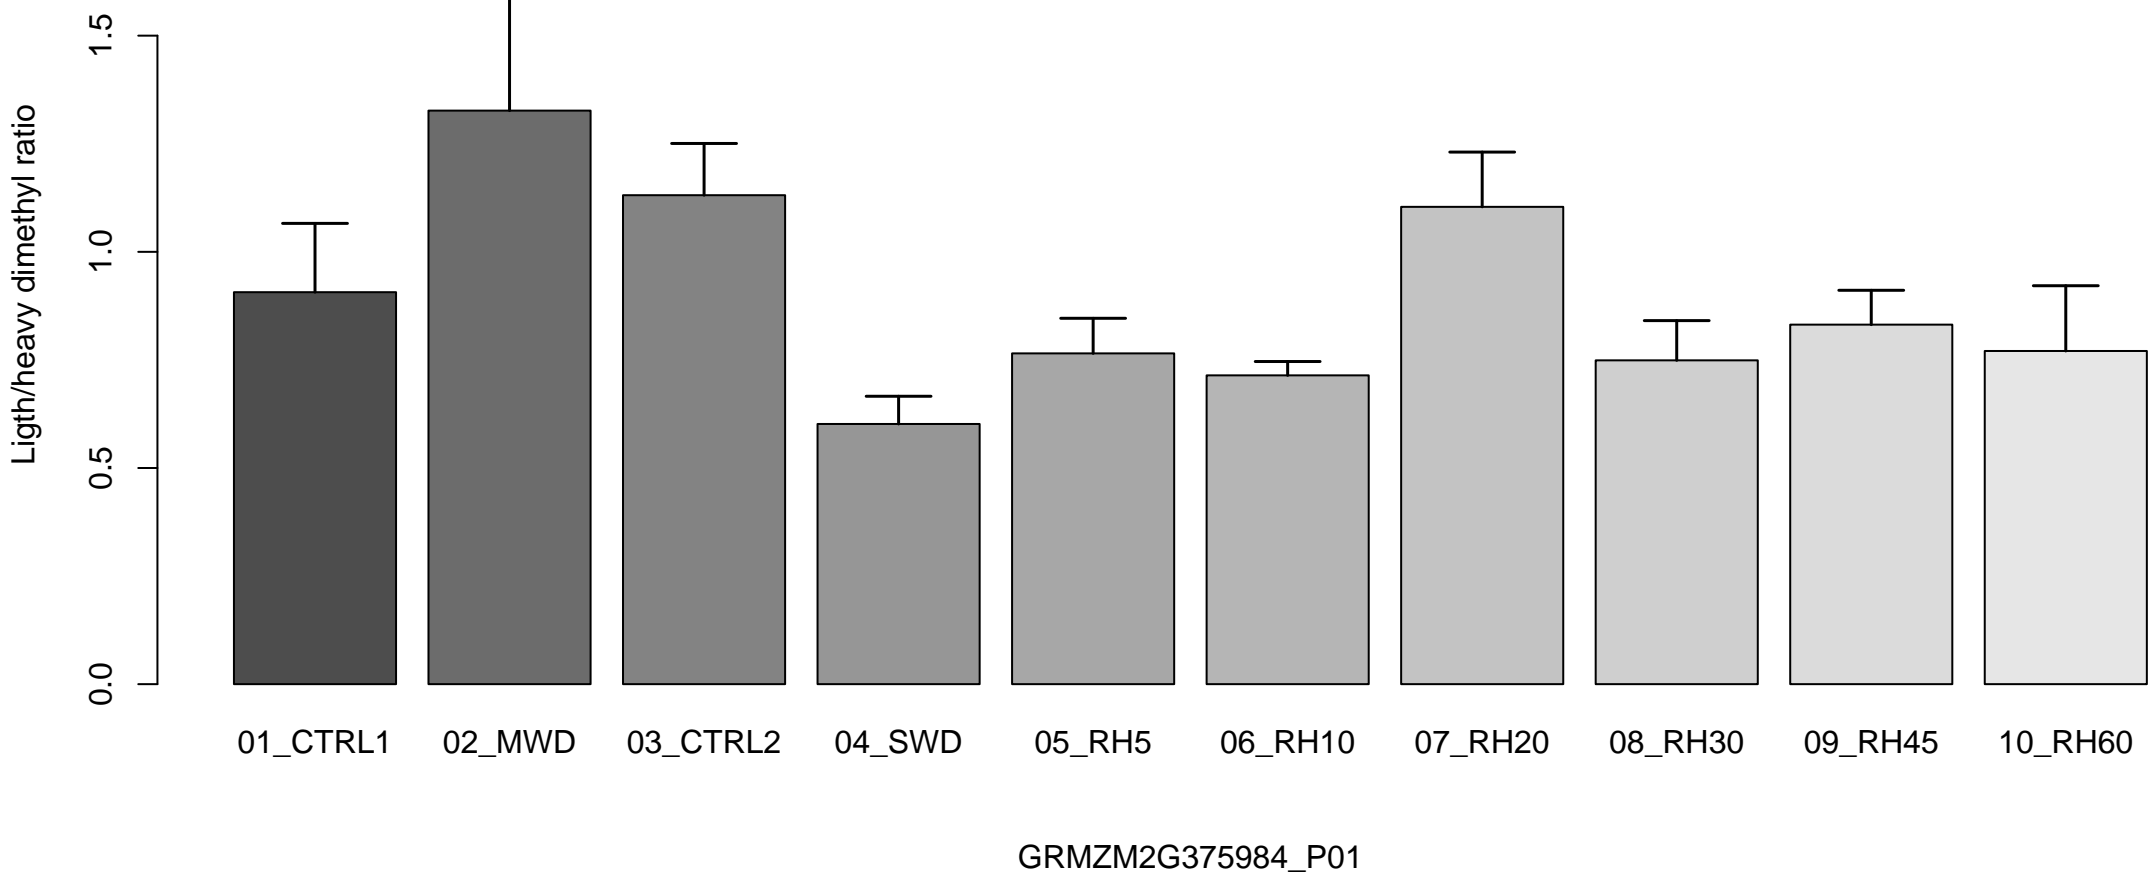

### Microtubule-associated protein MAP65-1a # S557

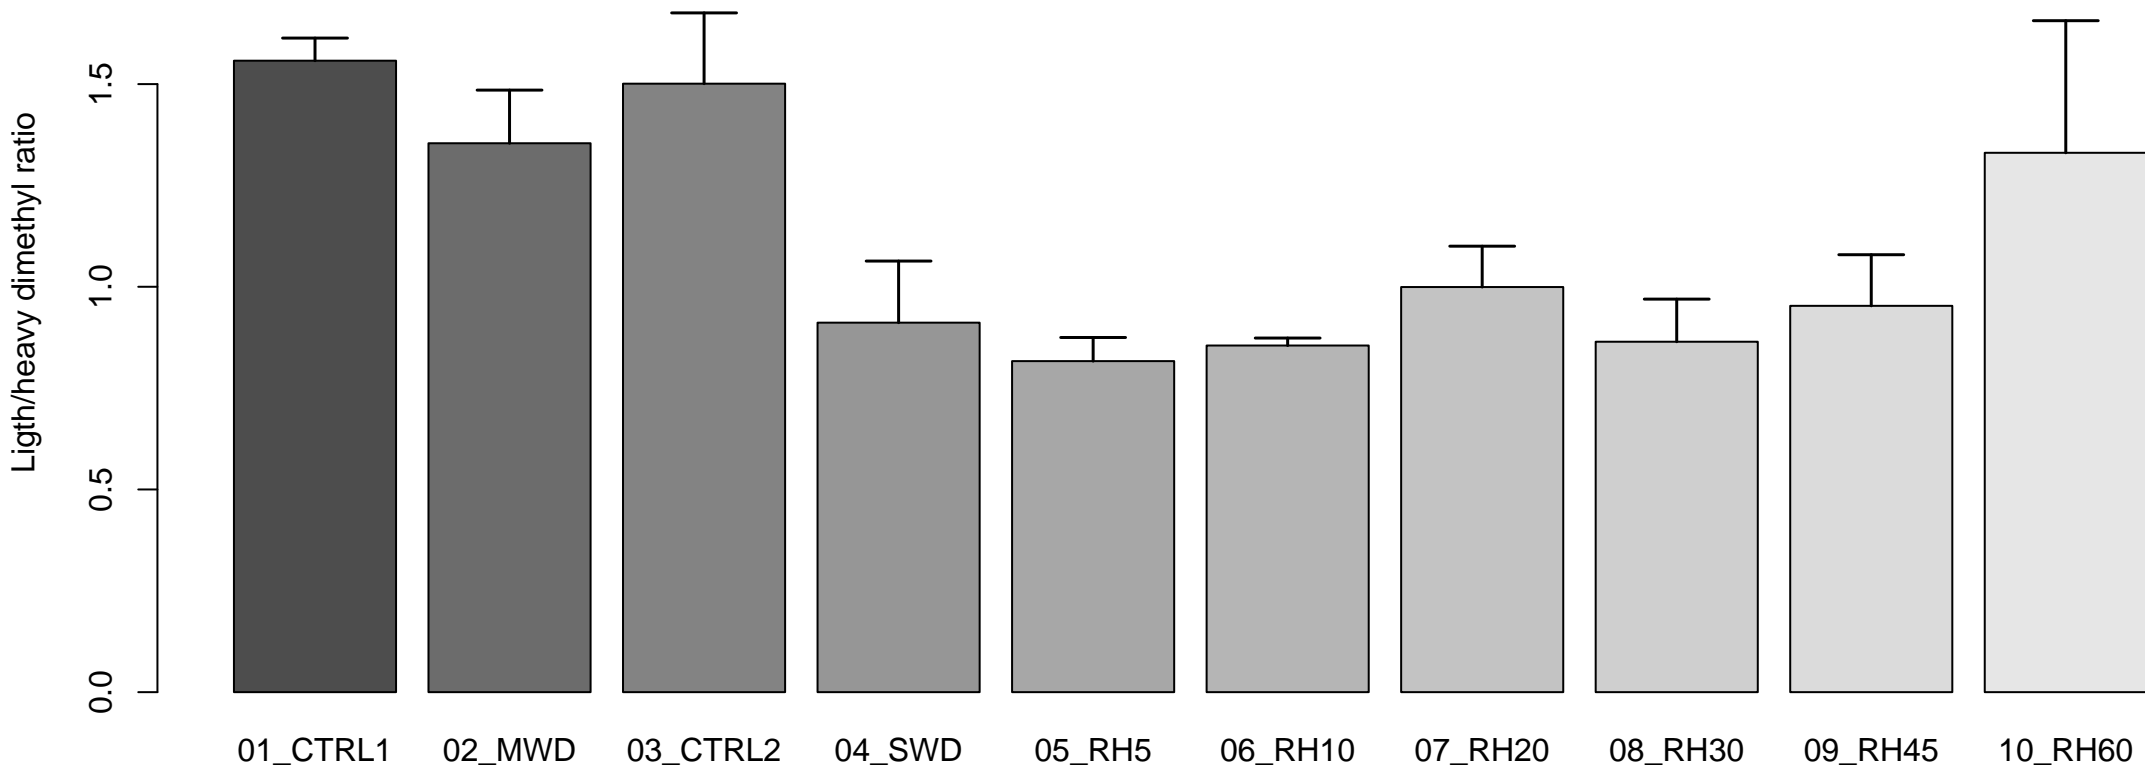

GRMZM2G465169\_P01

### Putative uncharacterized protein # S66

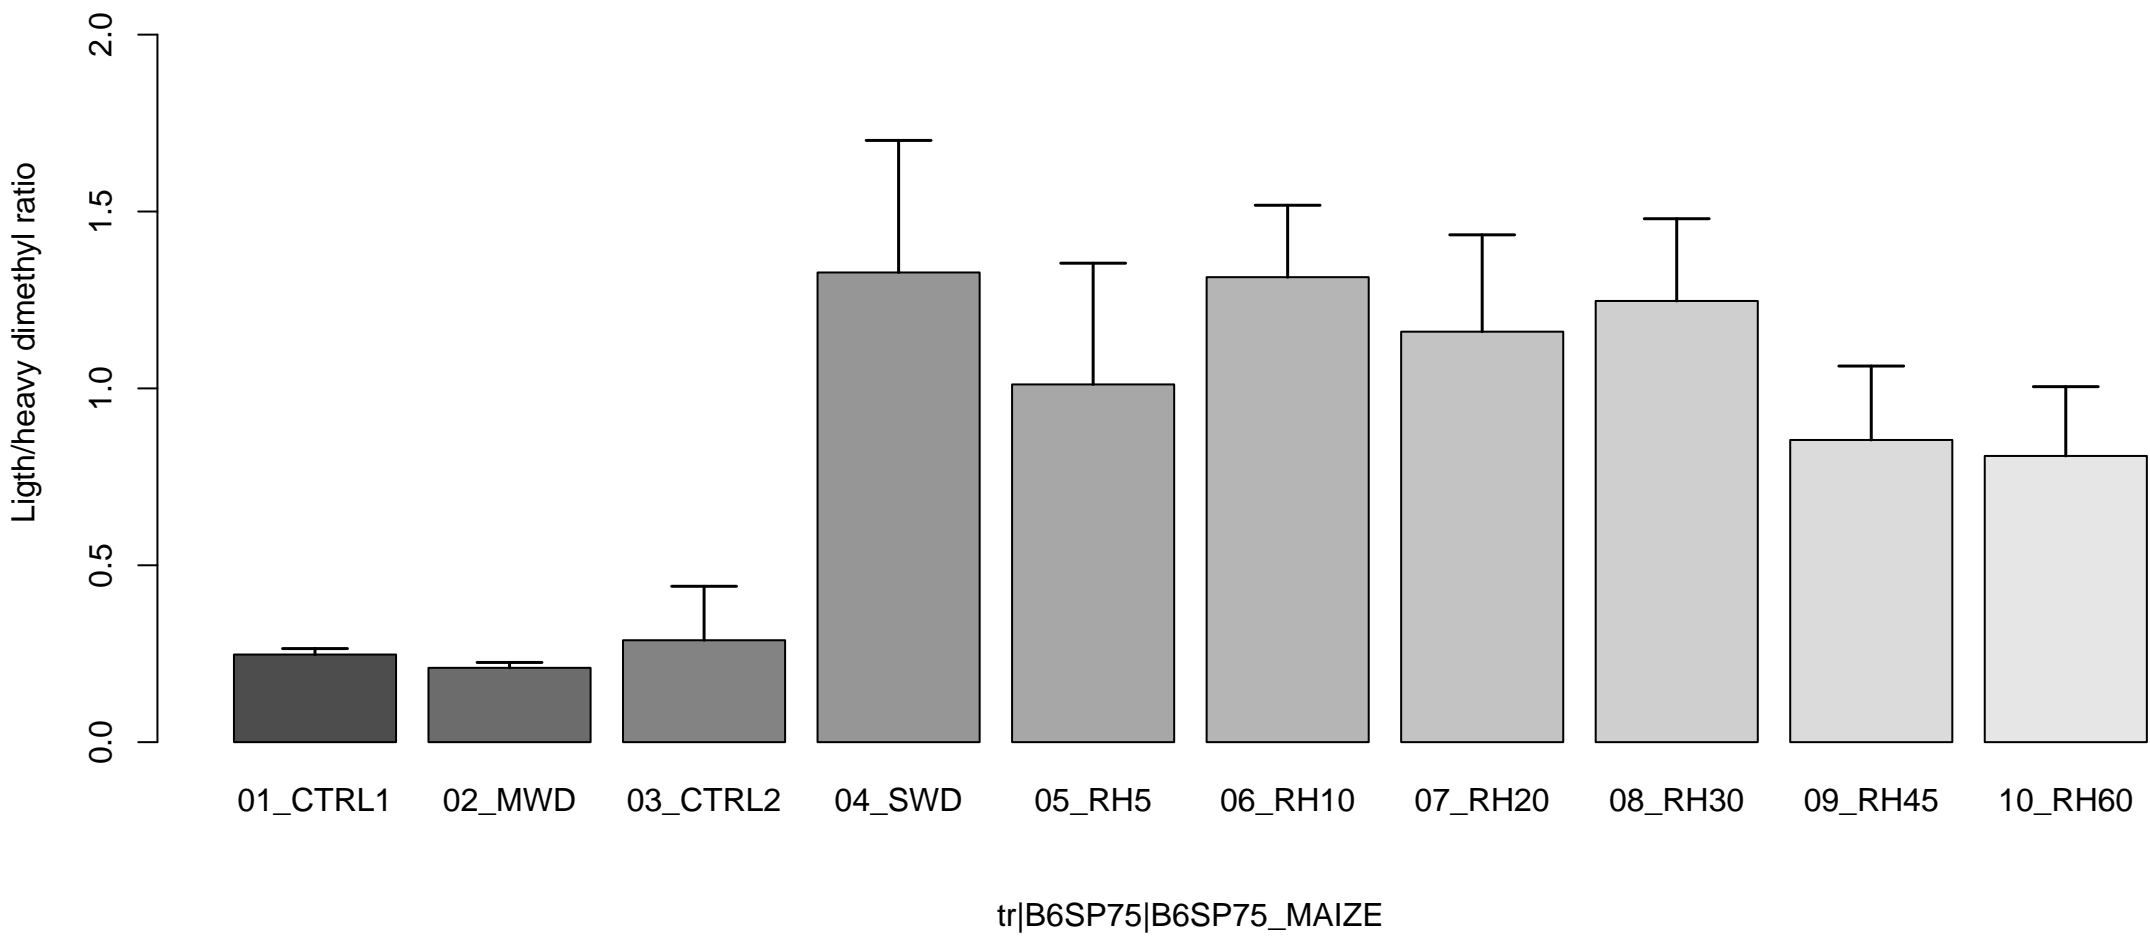

### DnaJ protein # T377

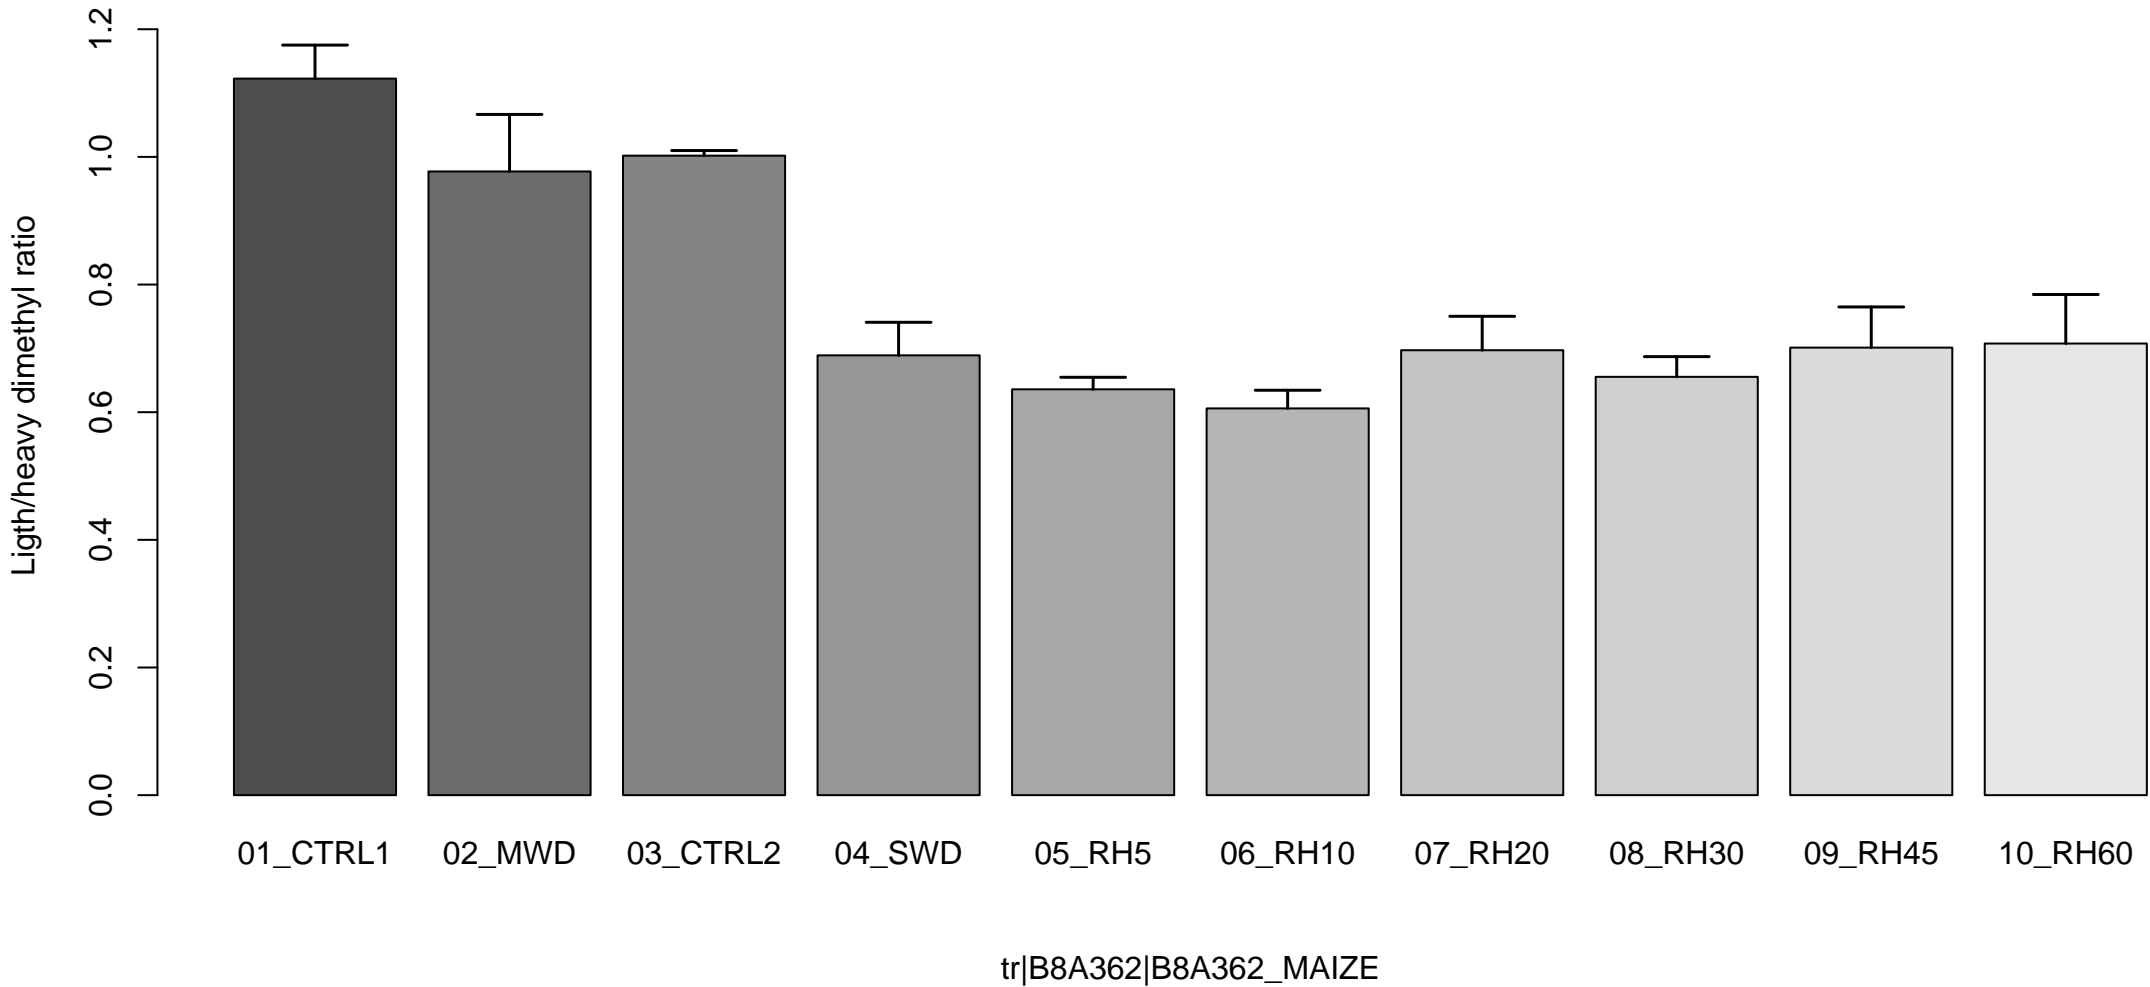



### BZIP transcriptional activator RSG, putative, expressed # S130

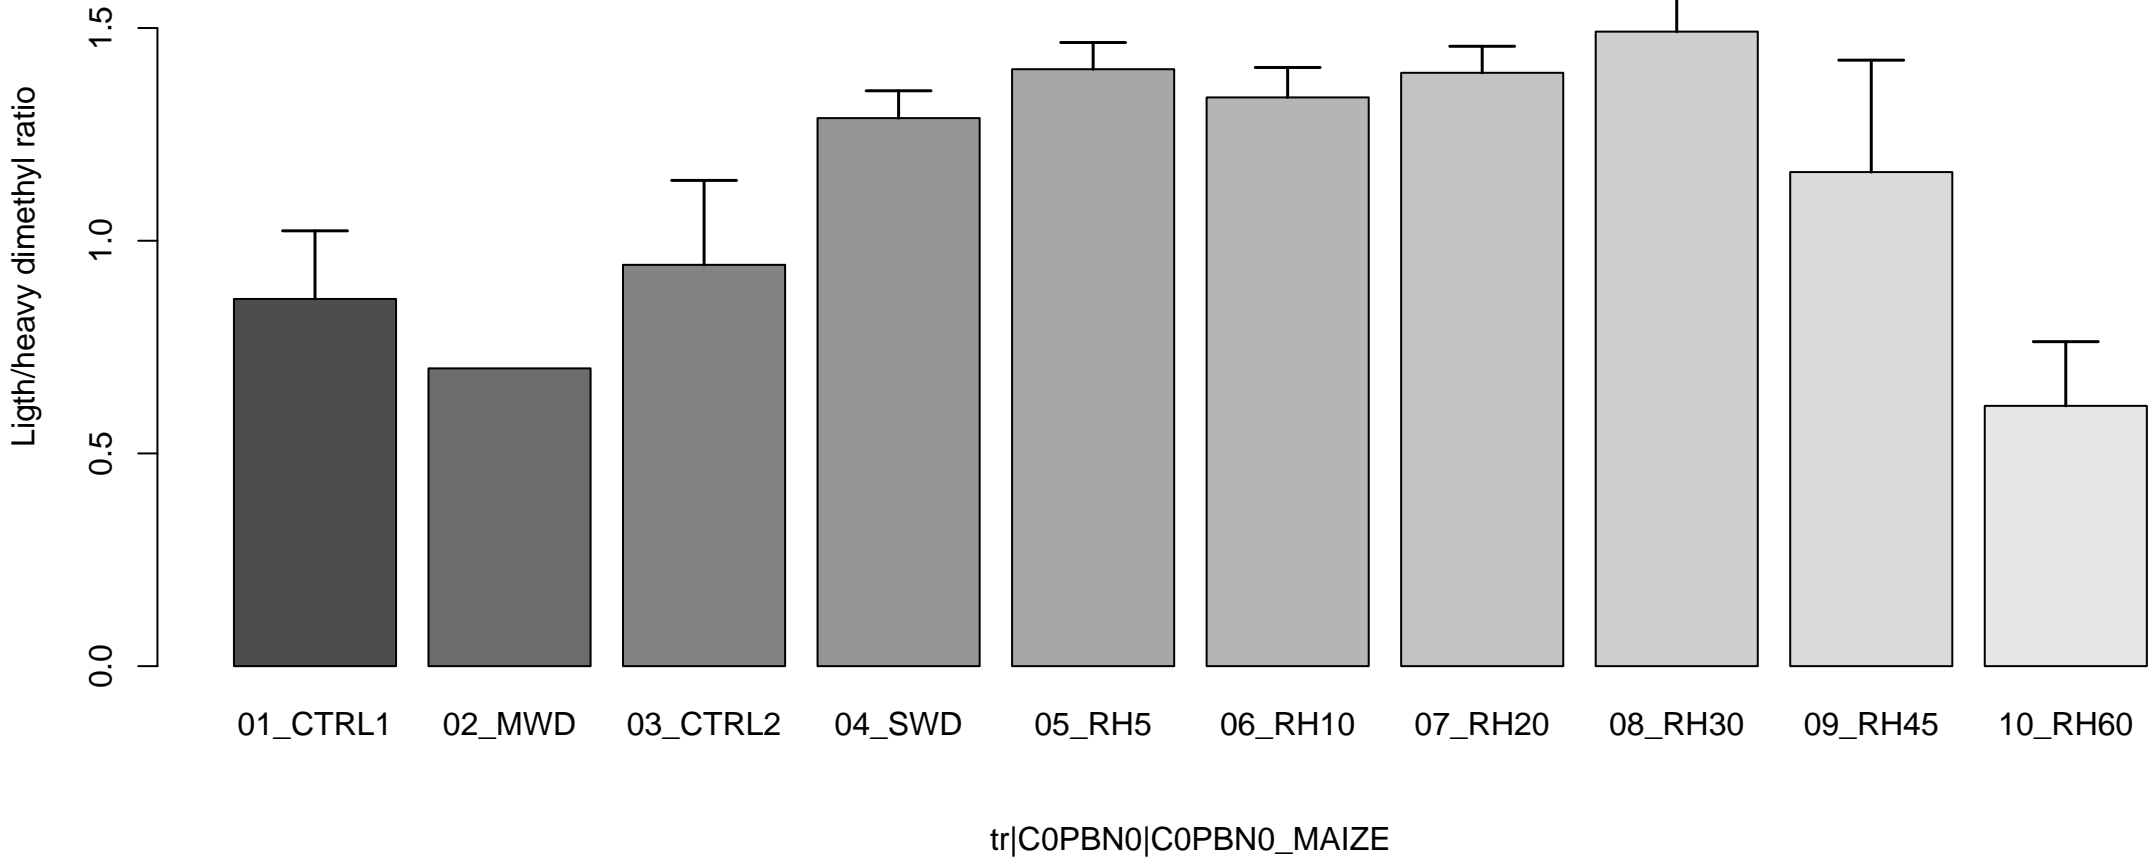

### Auxin-repressed protein # S29/S31

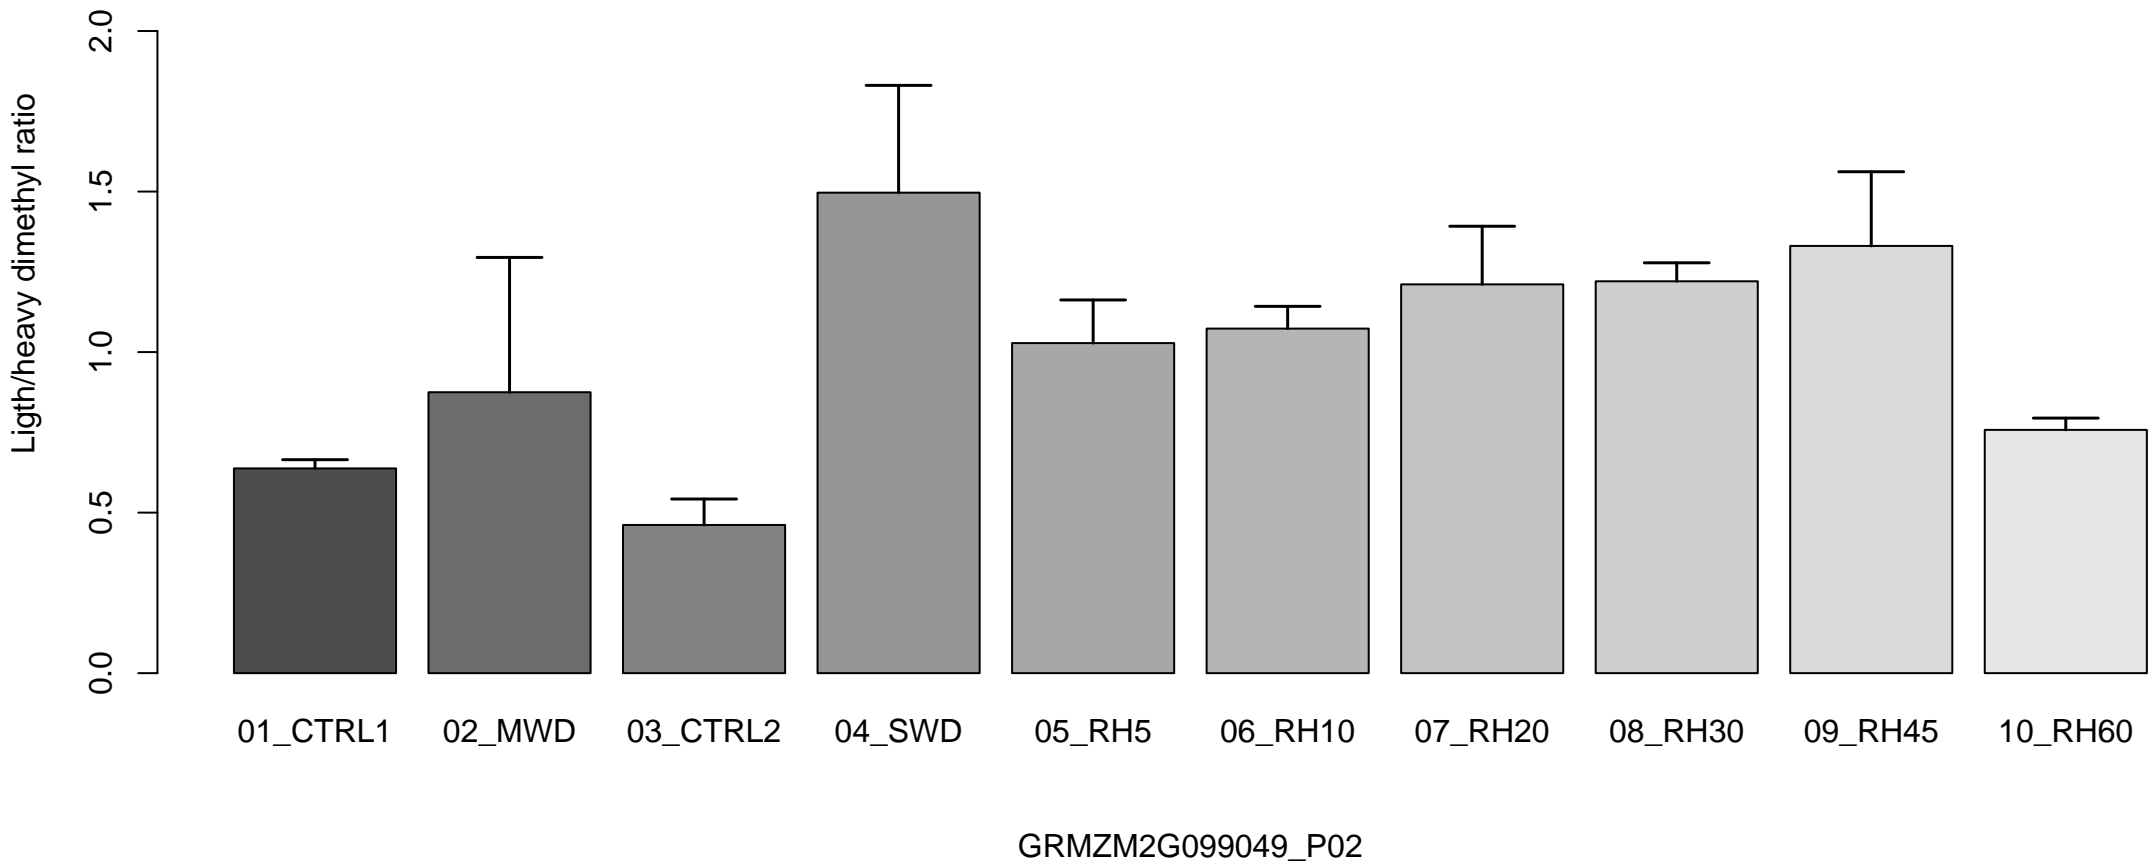

### Auxin-repressed protein # T118

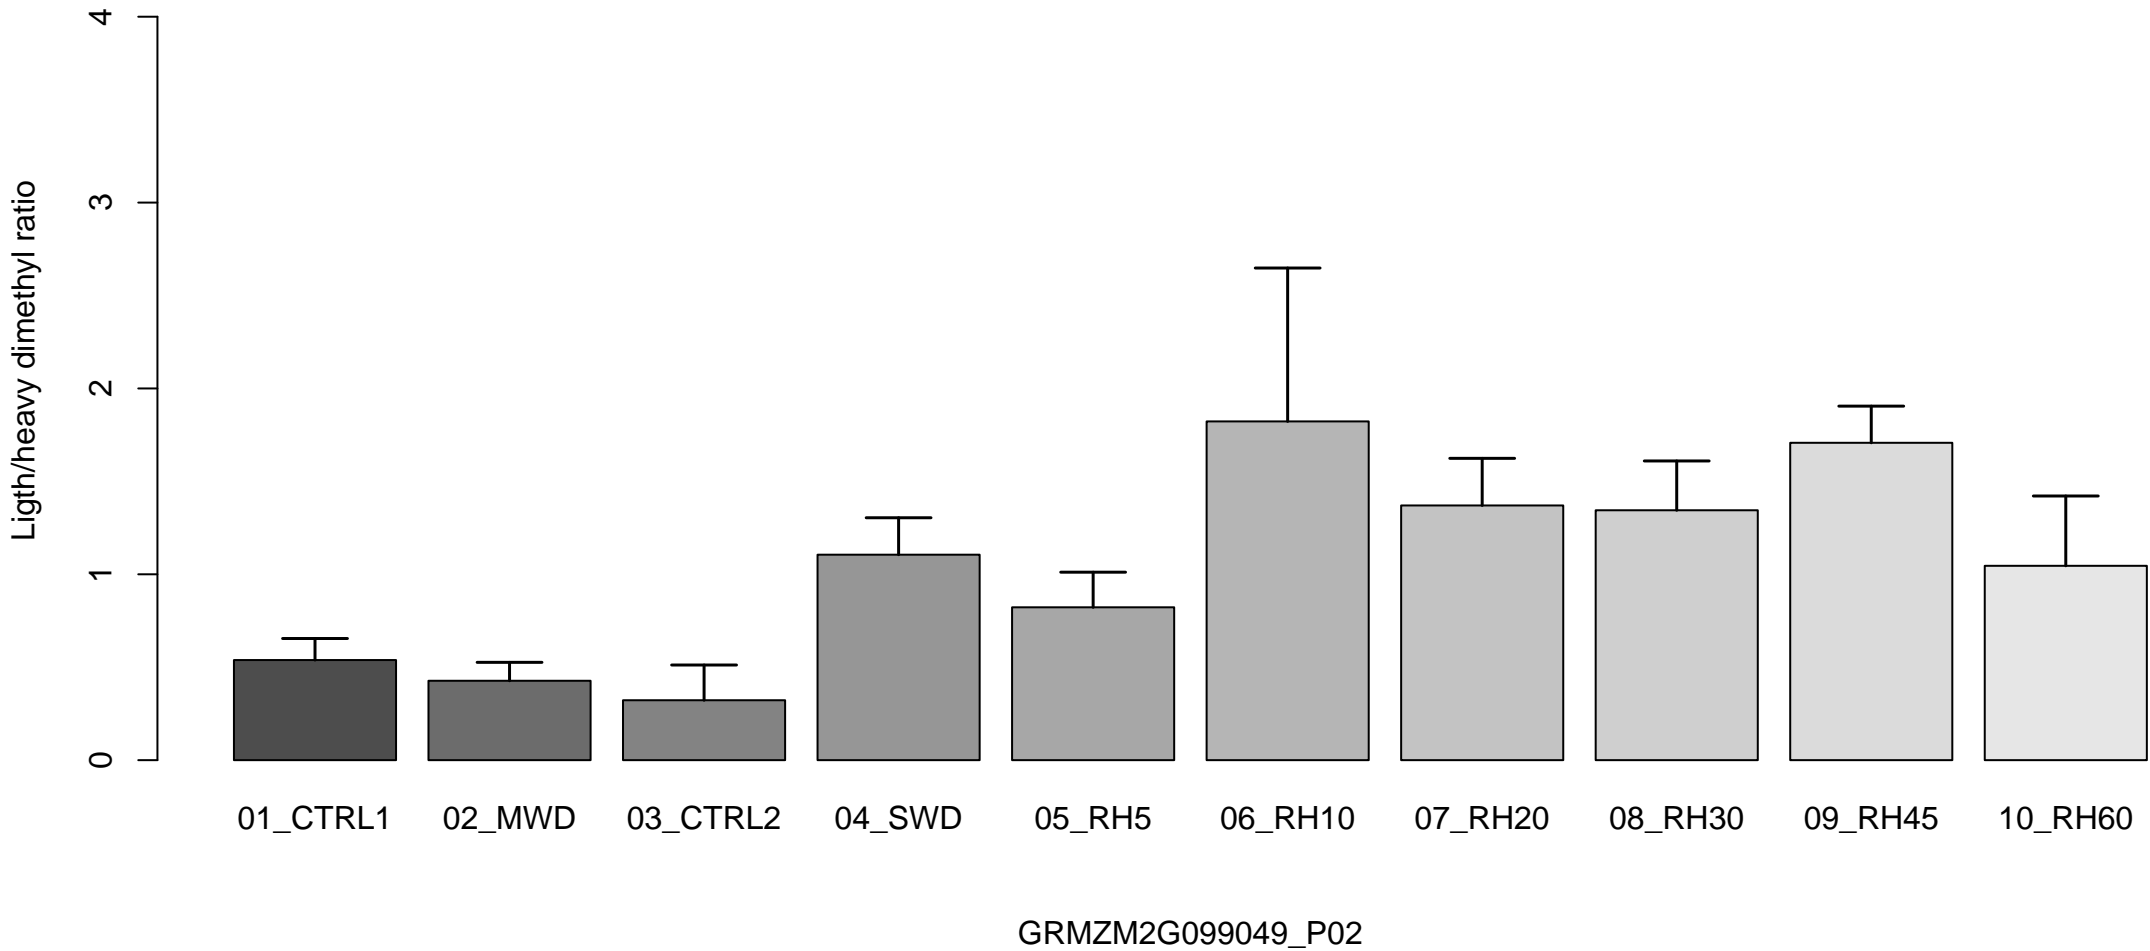

# Peptidylprolyl isomerase, putative, expressed # T320

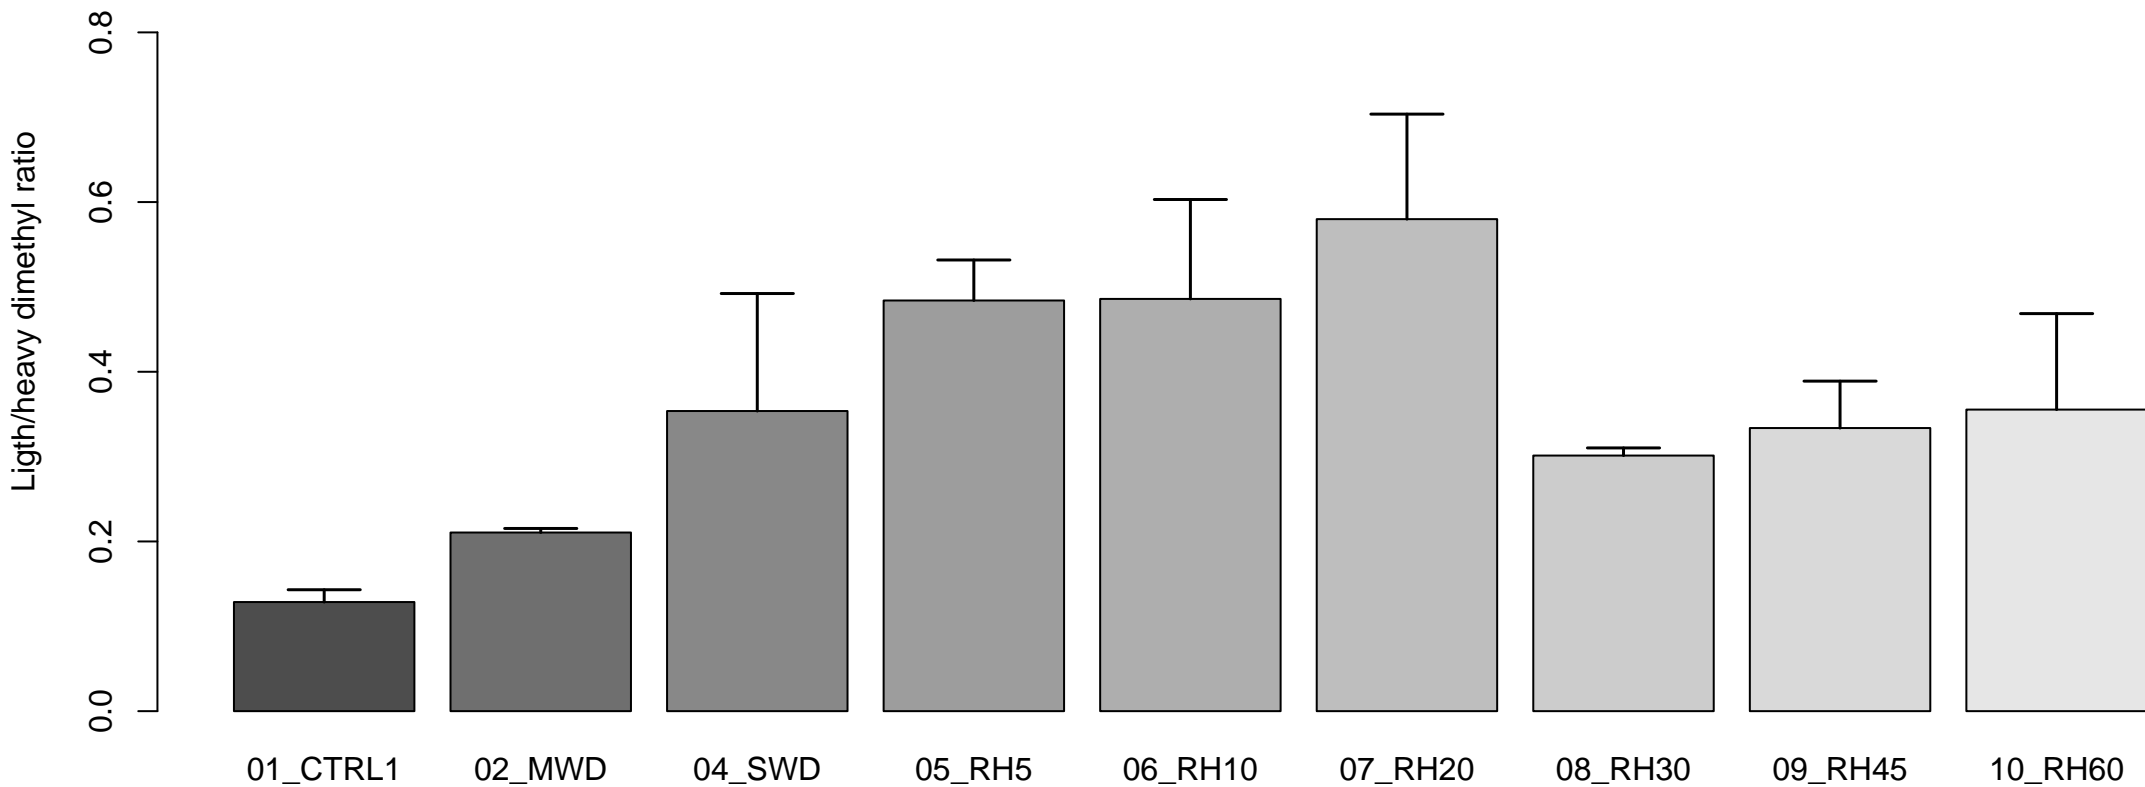

GRMZM2G007486\_P02

### 6-phosphofructokinase # S79

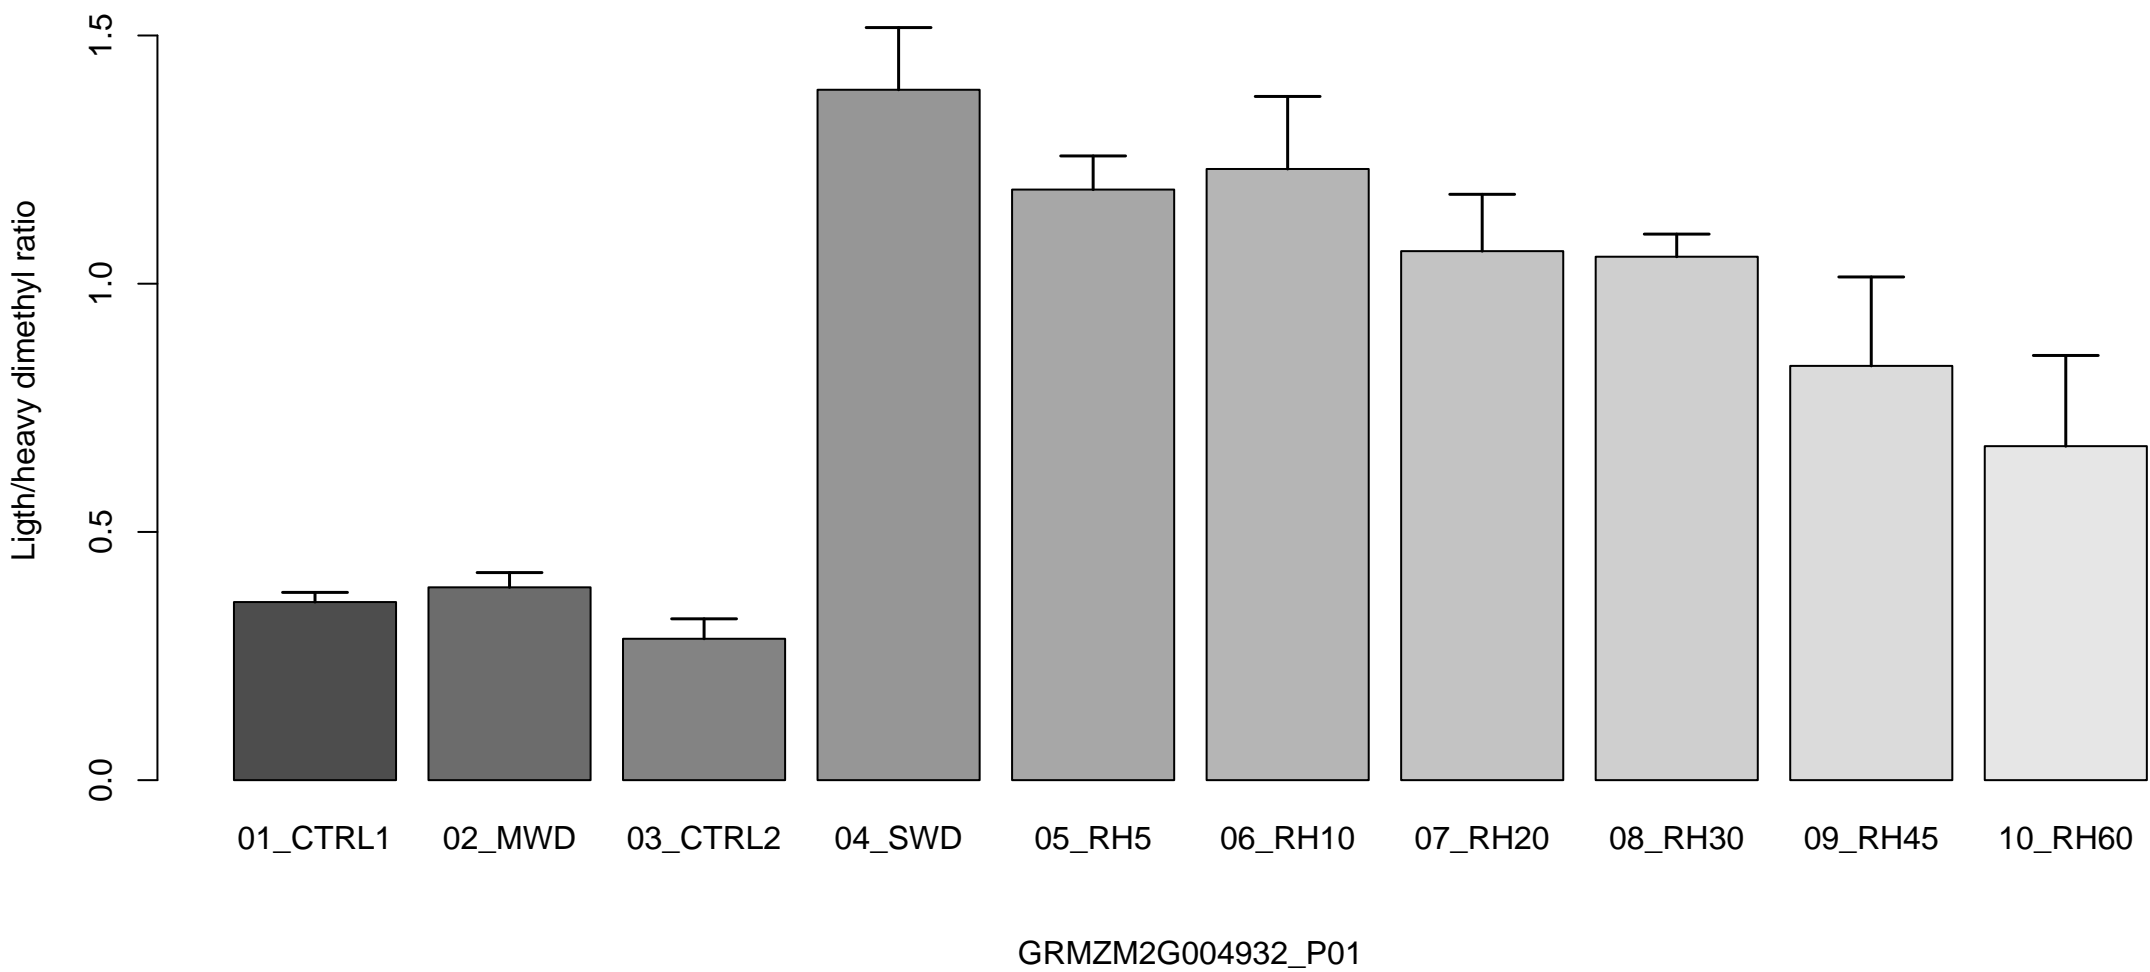

### Vacuolar protein sorting 26 # S221

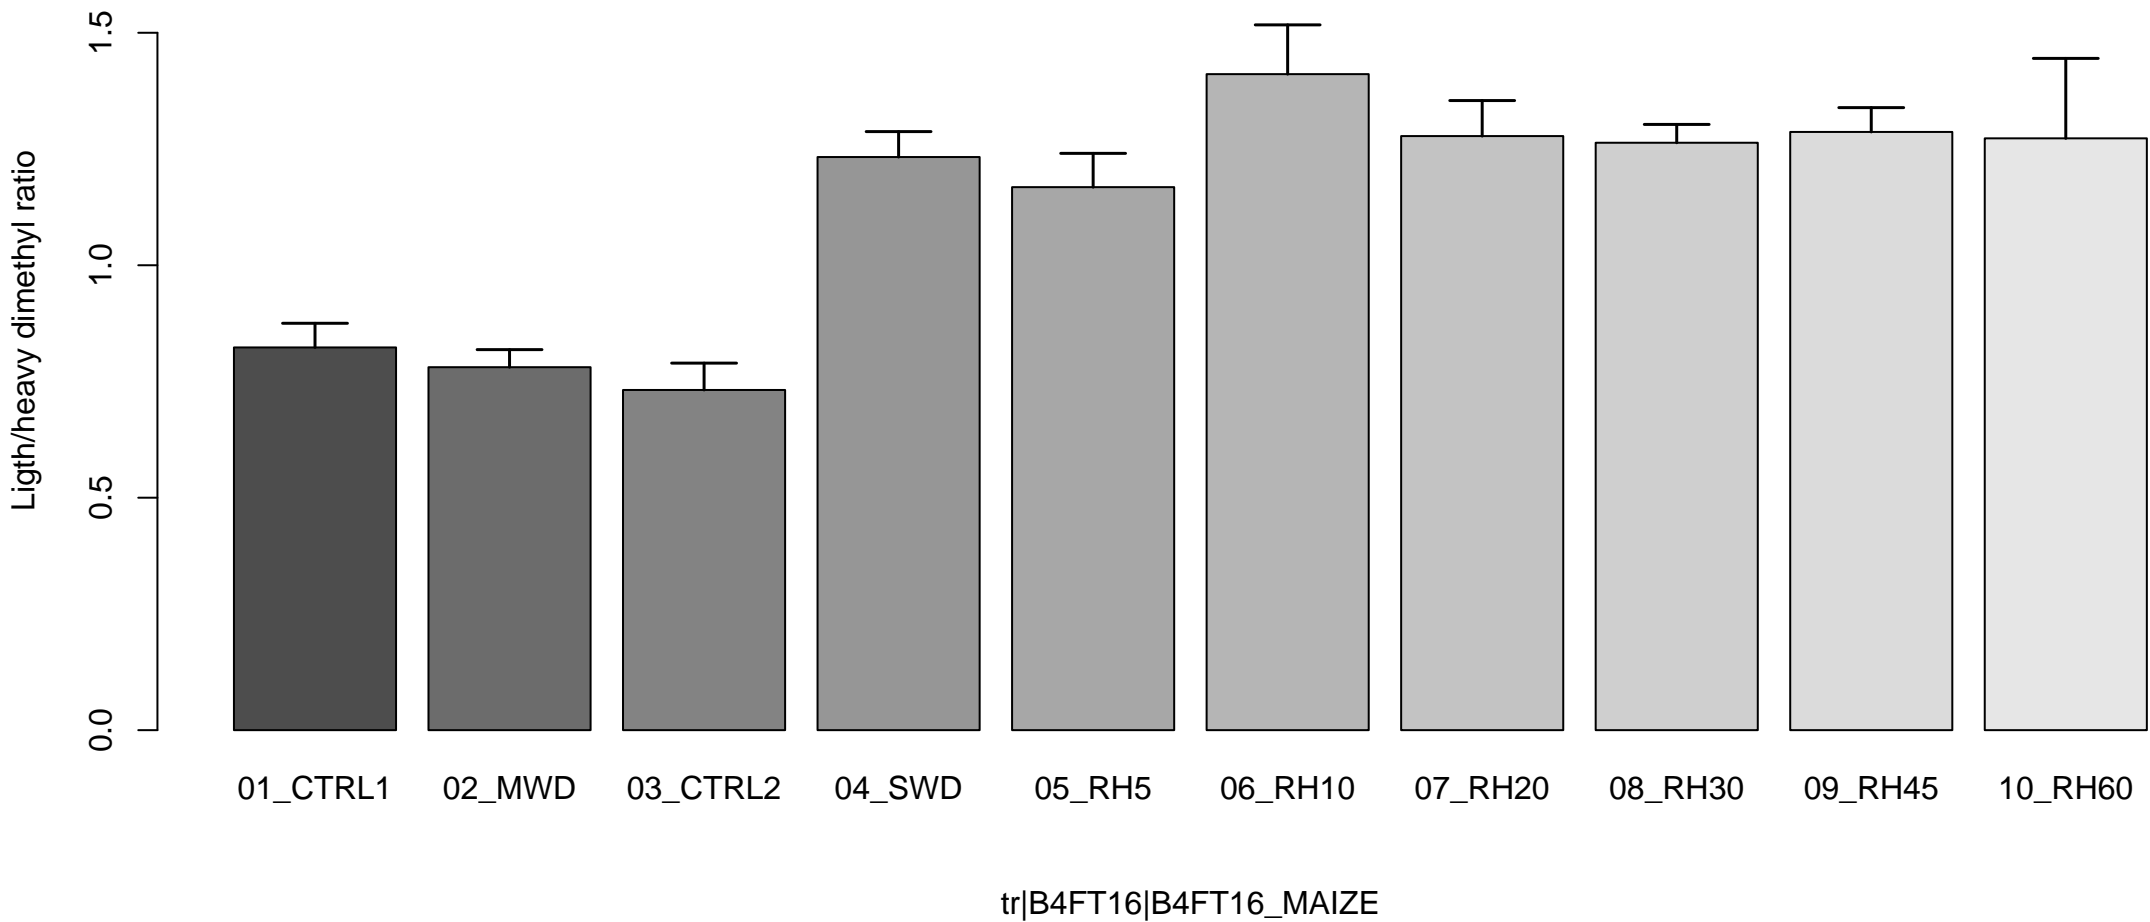

### GTP-ase activating protein for Arf containing protein # T310/S312

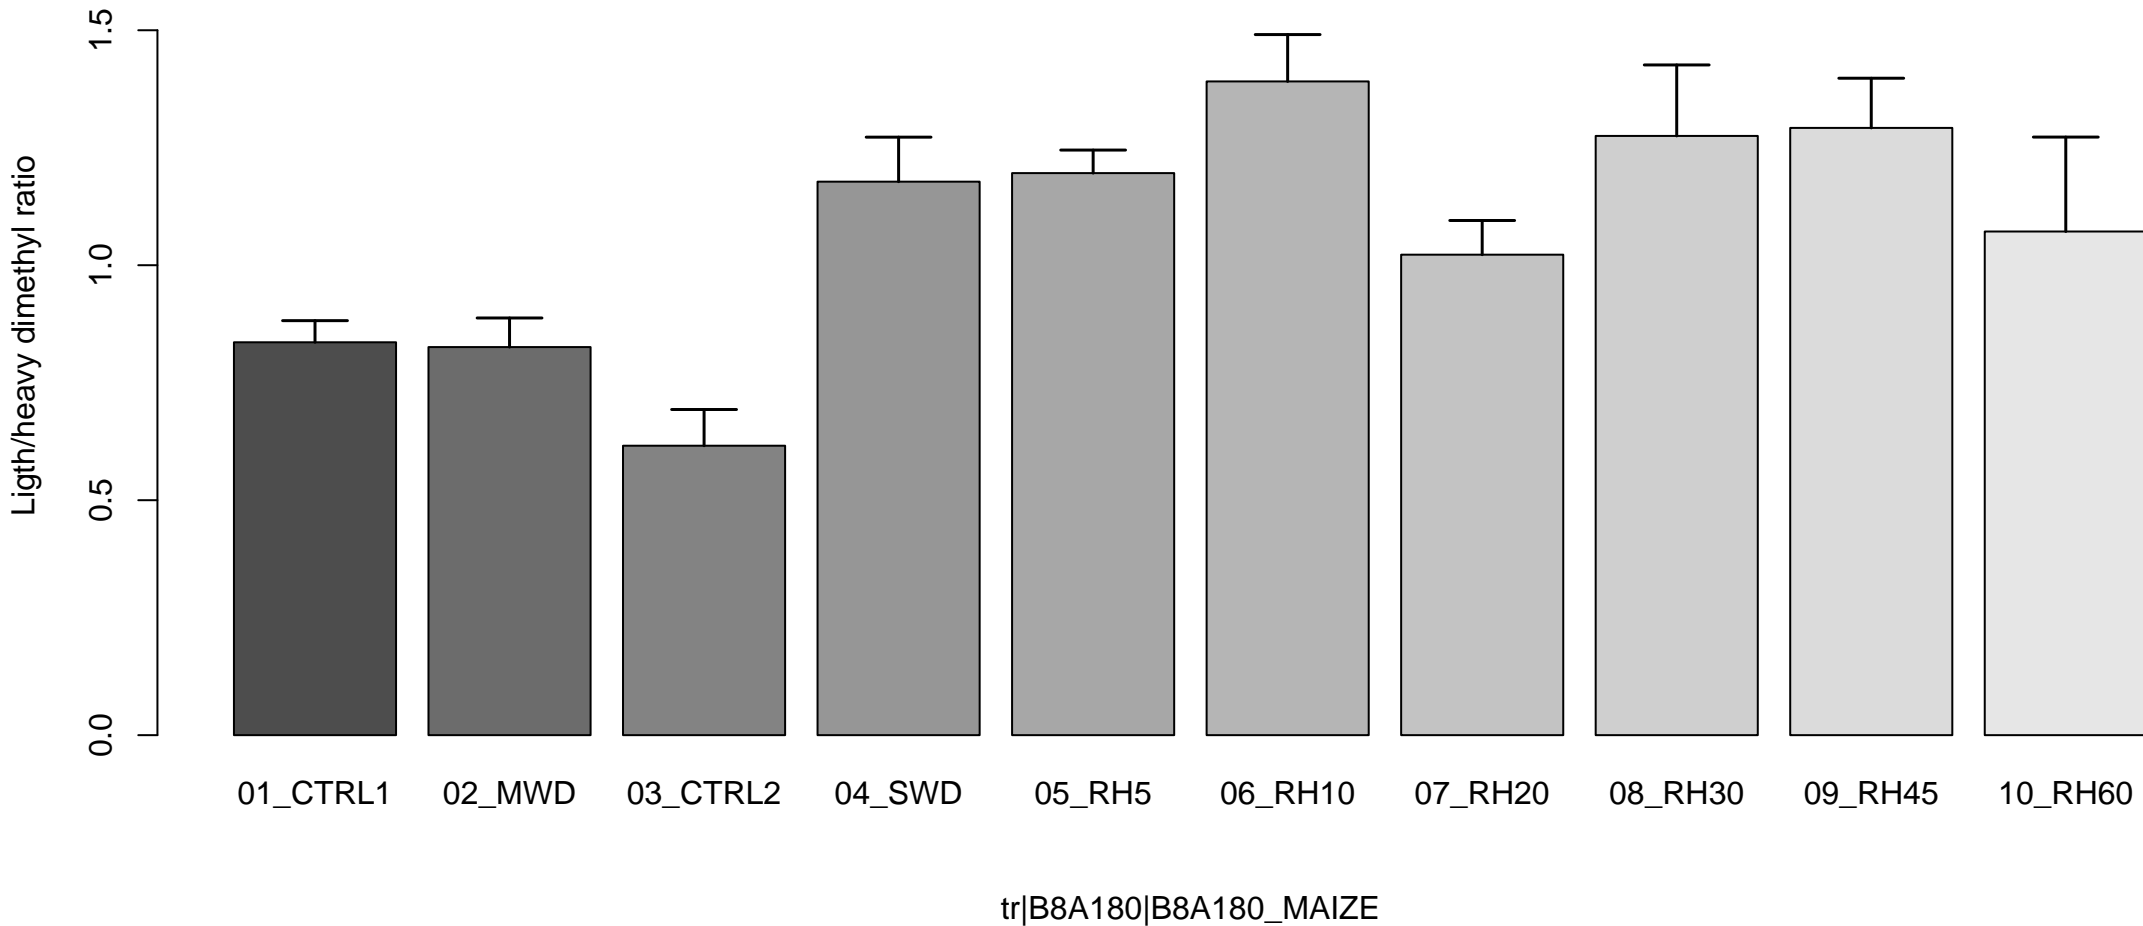

### GTP-ase activating protein for Arf containing protein # S340/S341/S343

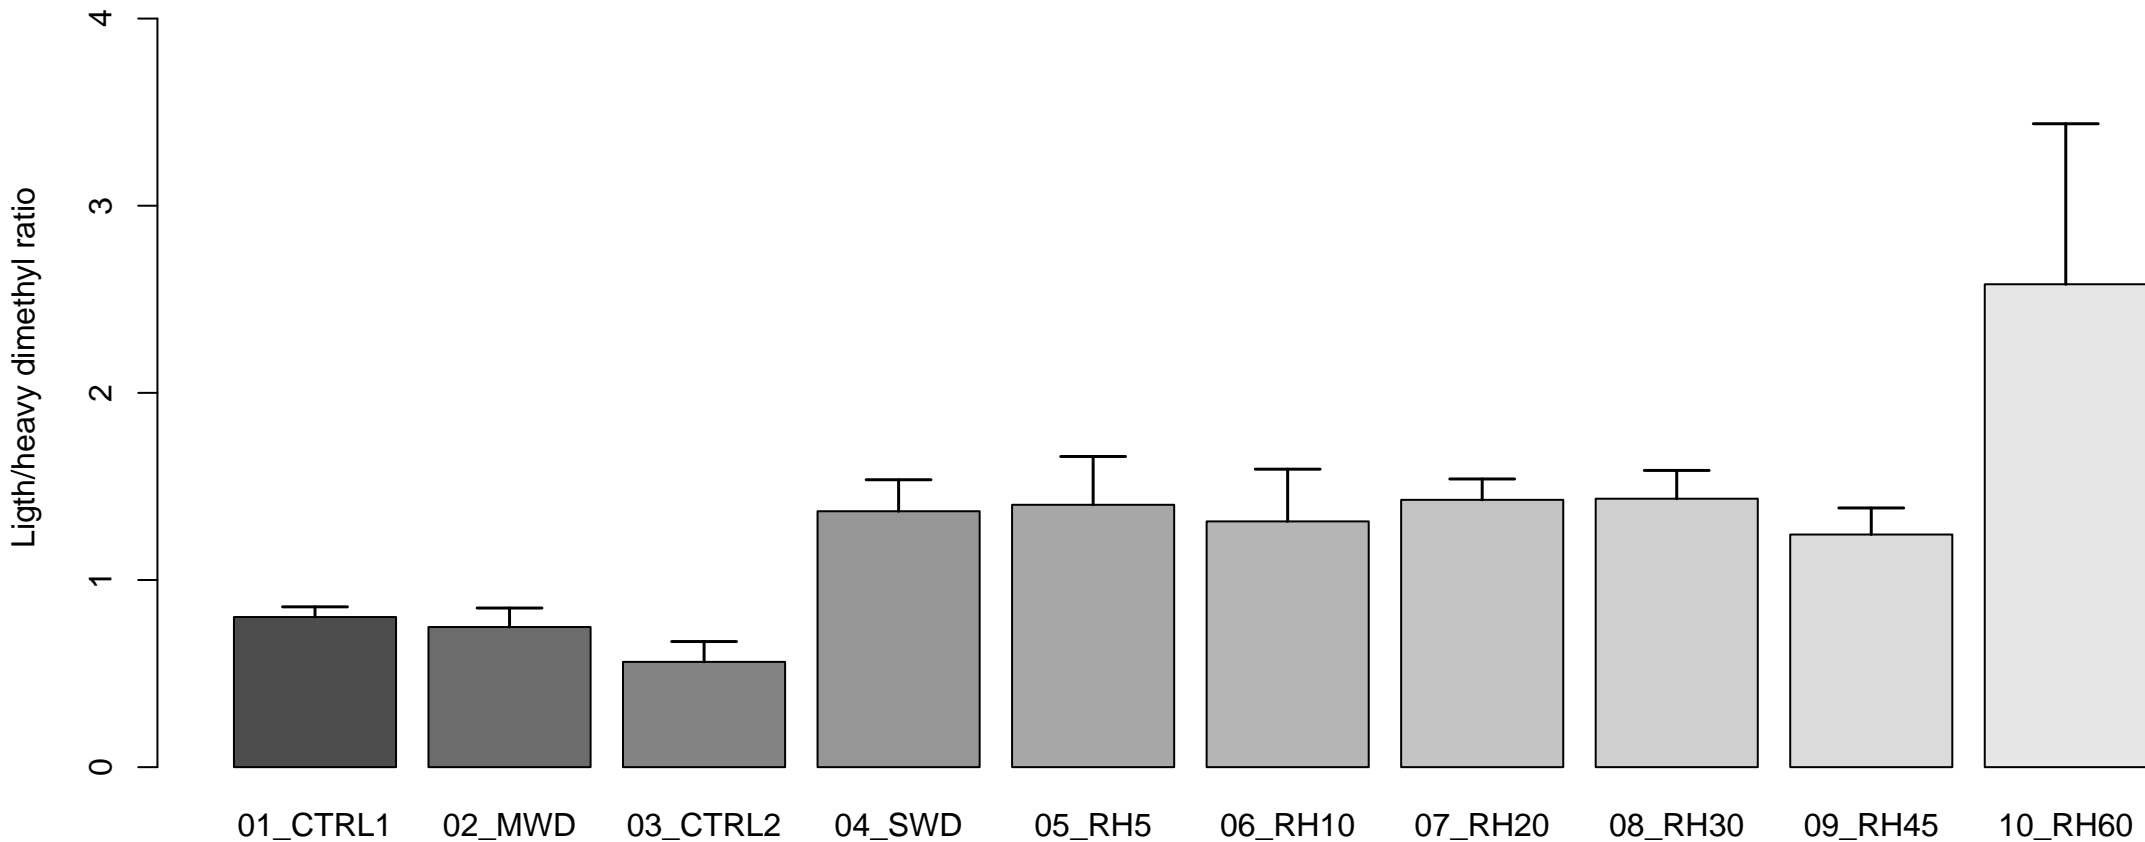

GRMZM2G341732\_P02



### GTP-ase activating protein for Arf containing protein # S241

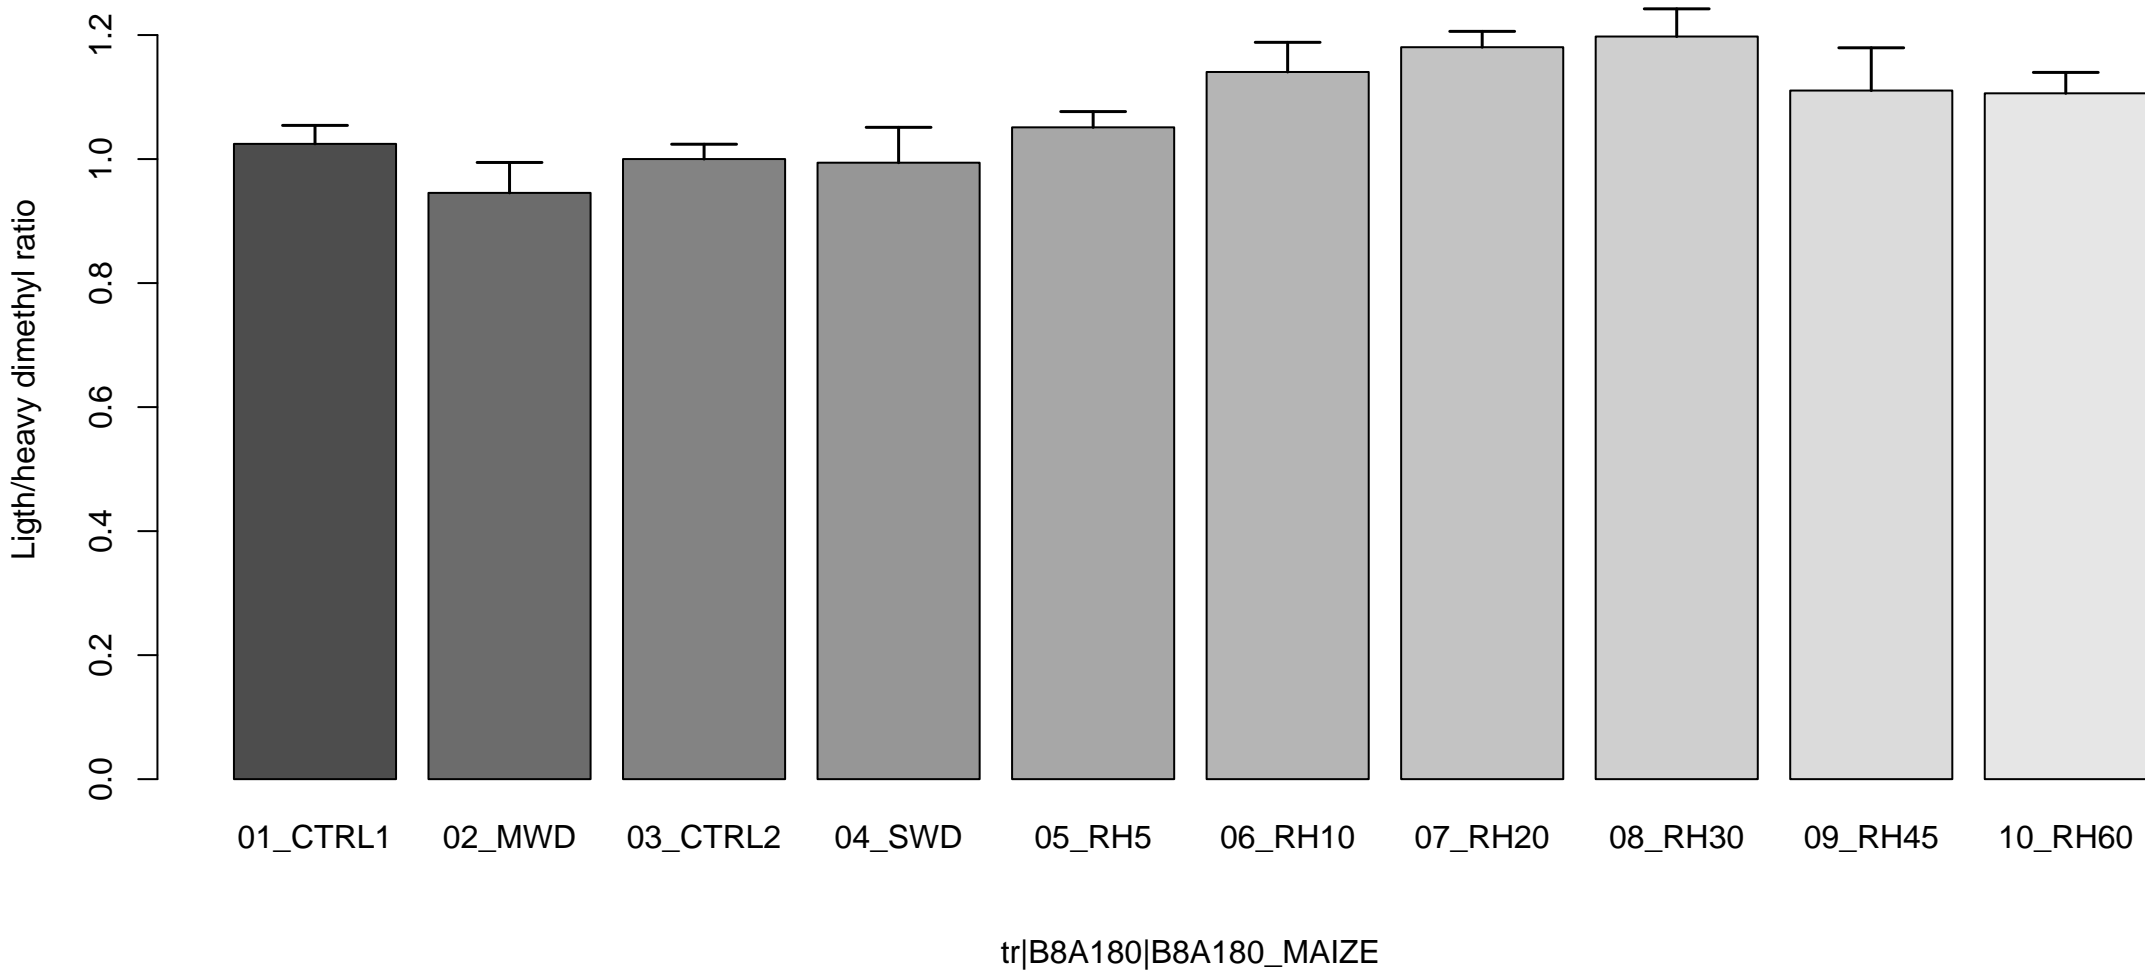

### Putative uncharacterized protein # S127

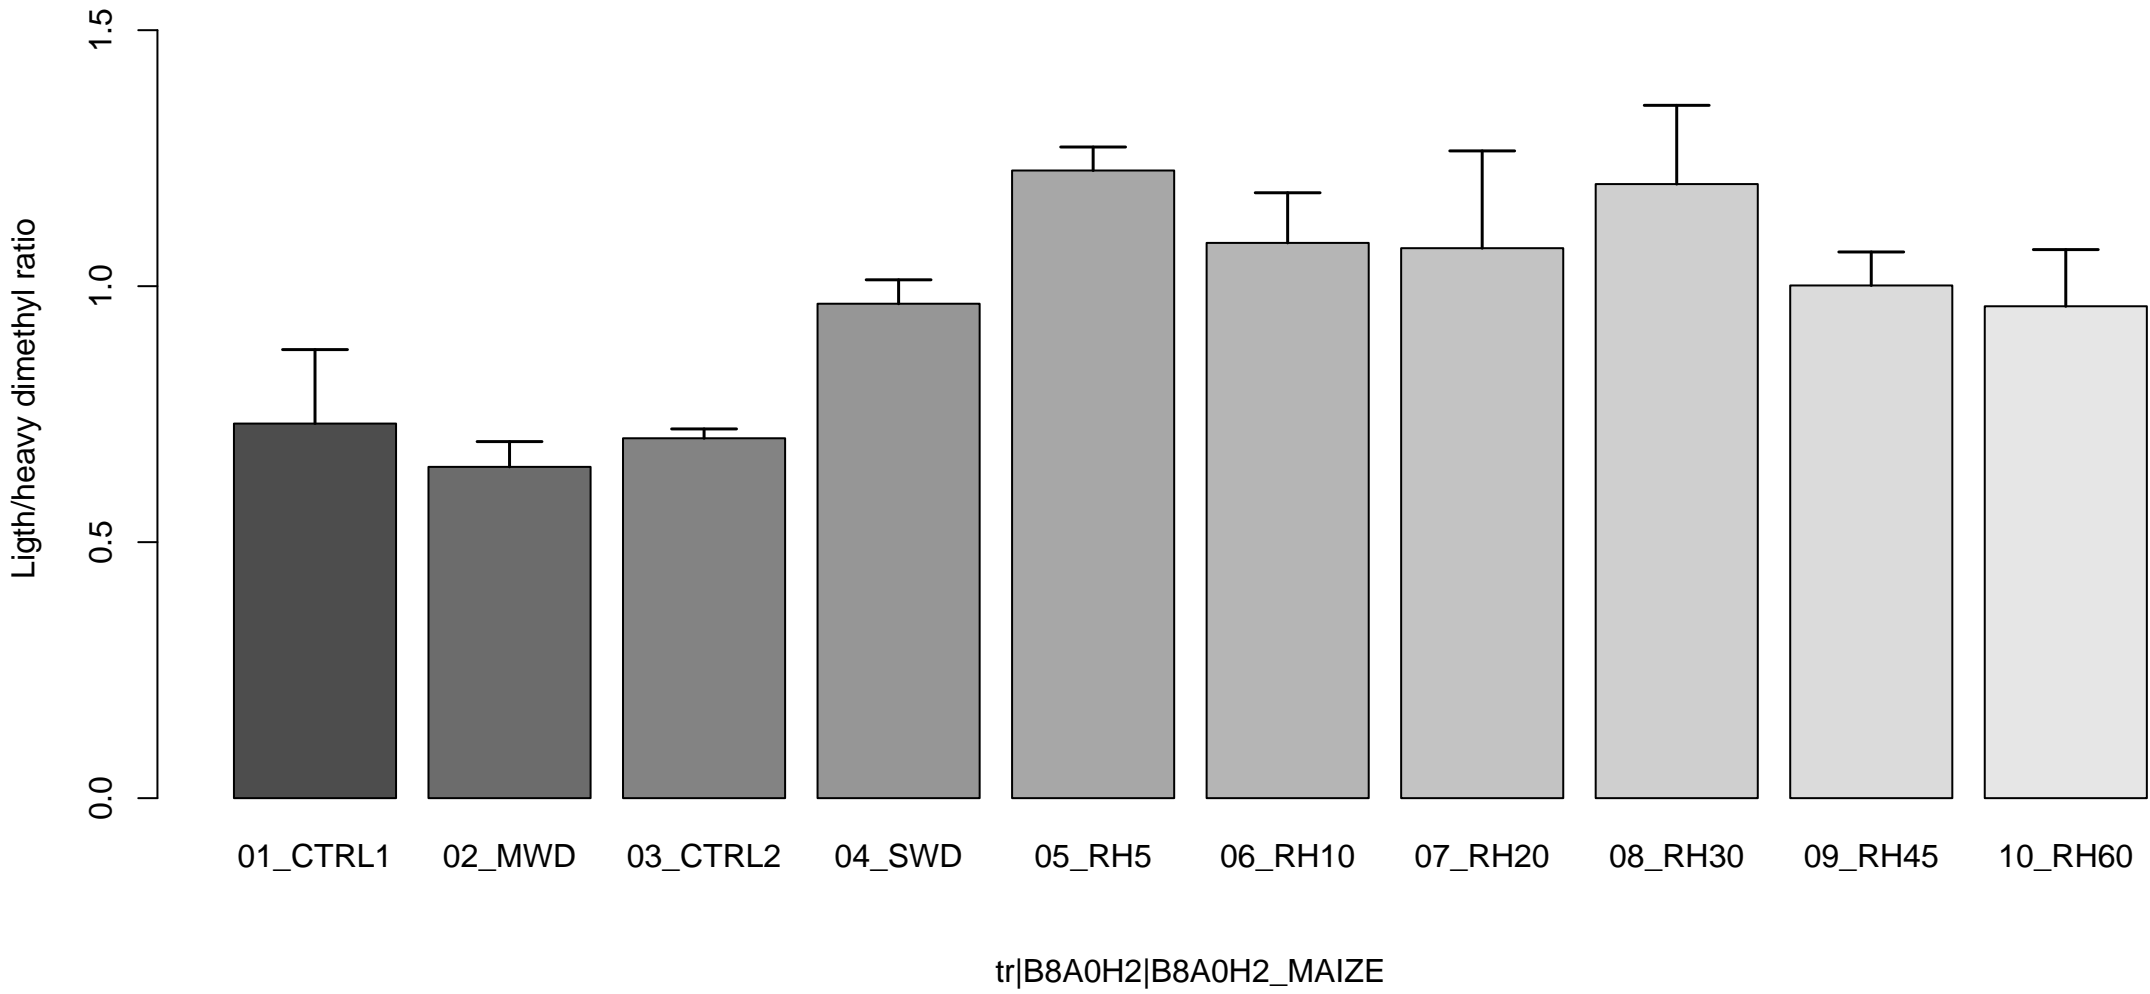

### Auxin-repressed 12.5 kDa protein # S59/S60/S61/T66

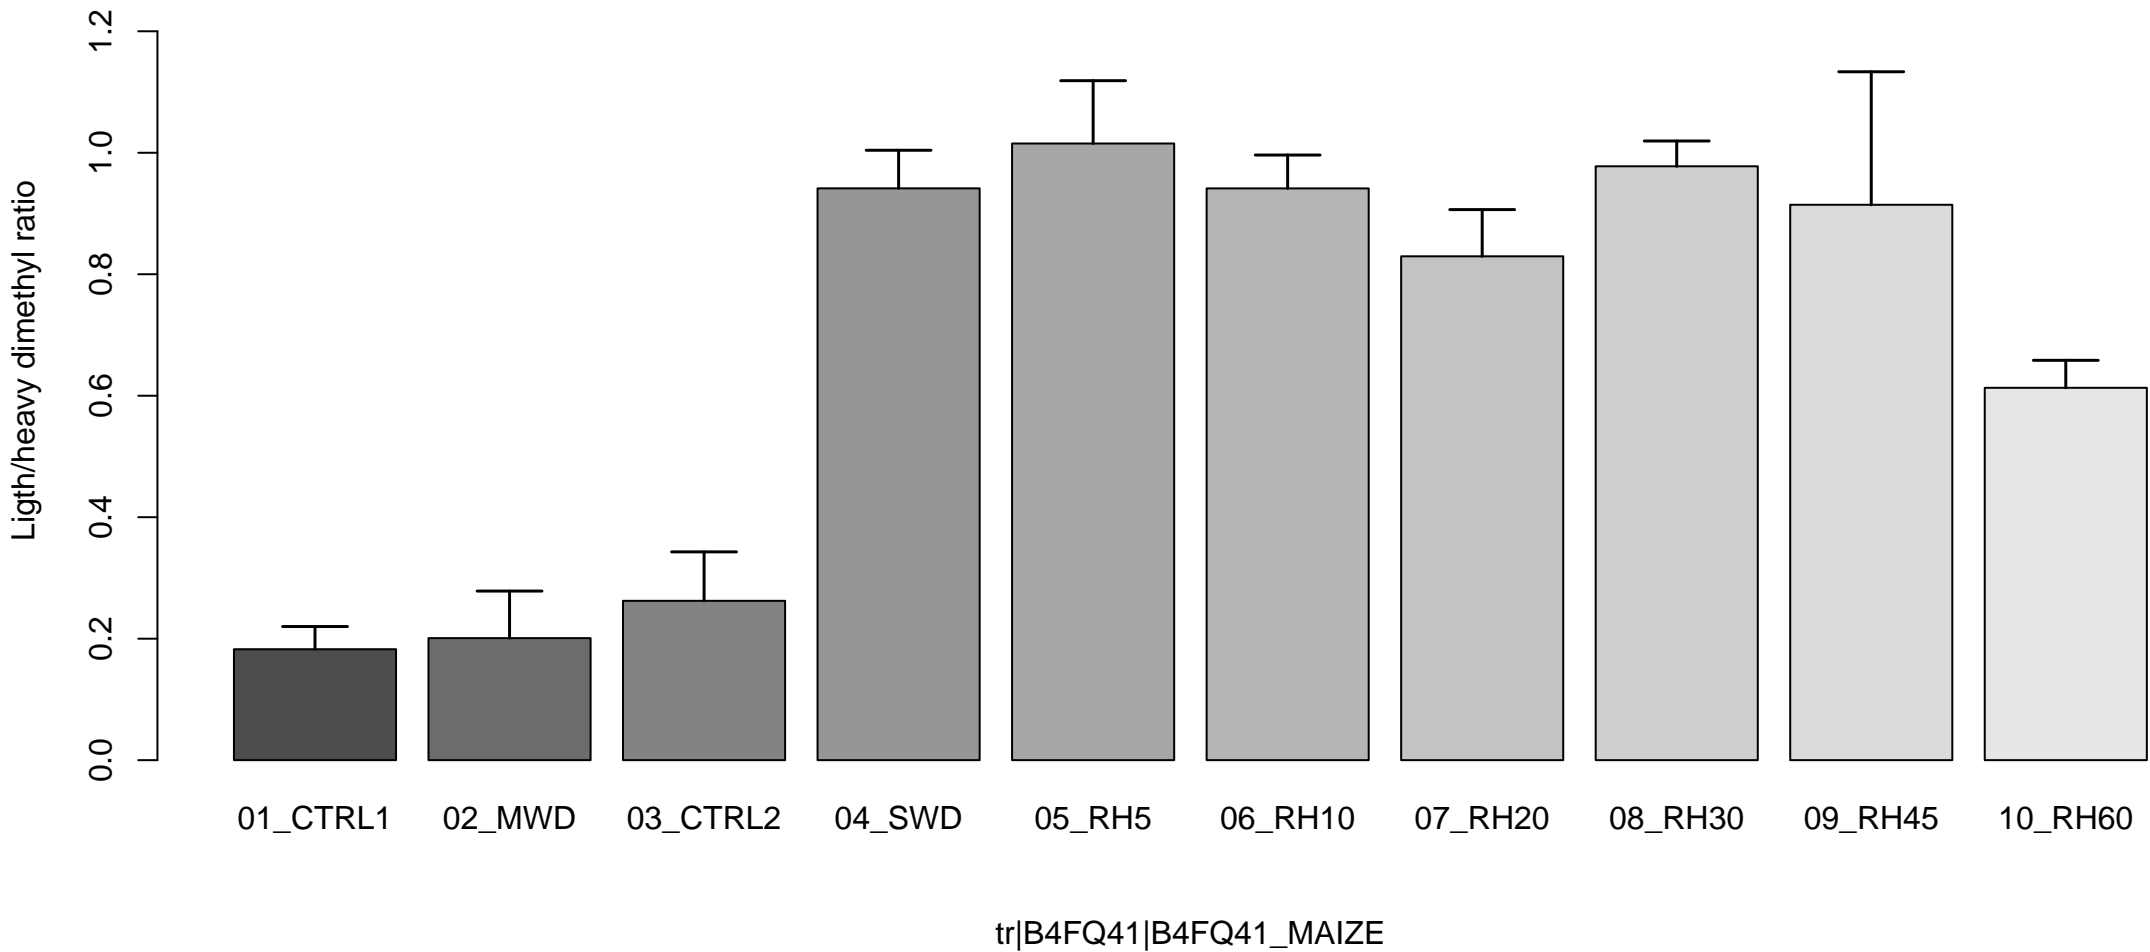

### Putative uncharacterized protein # S34

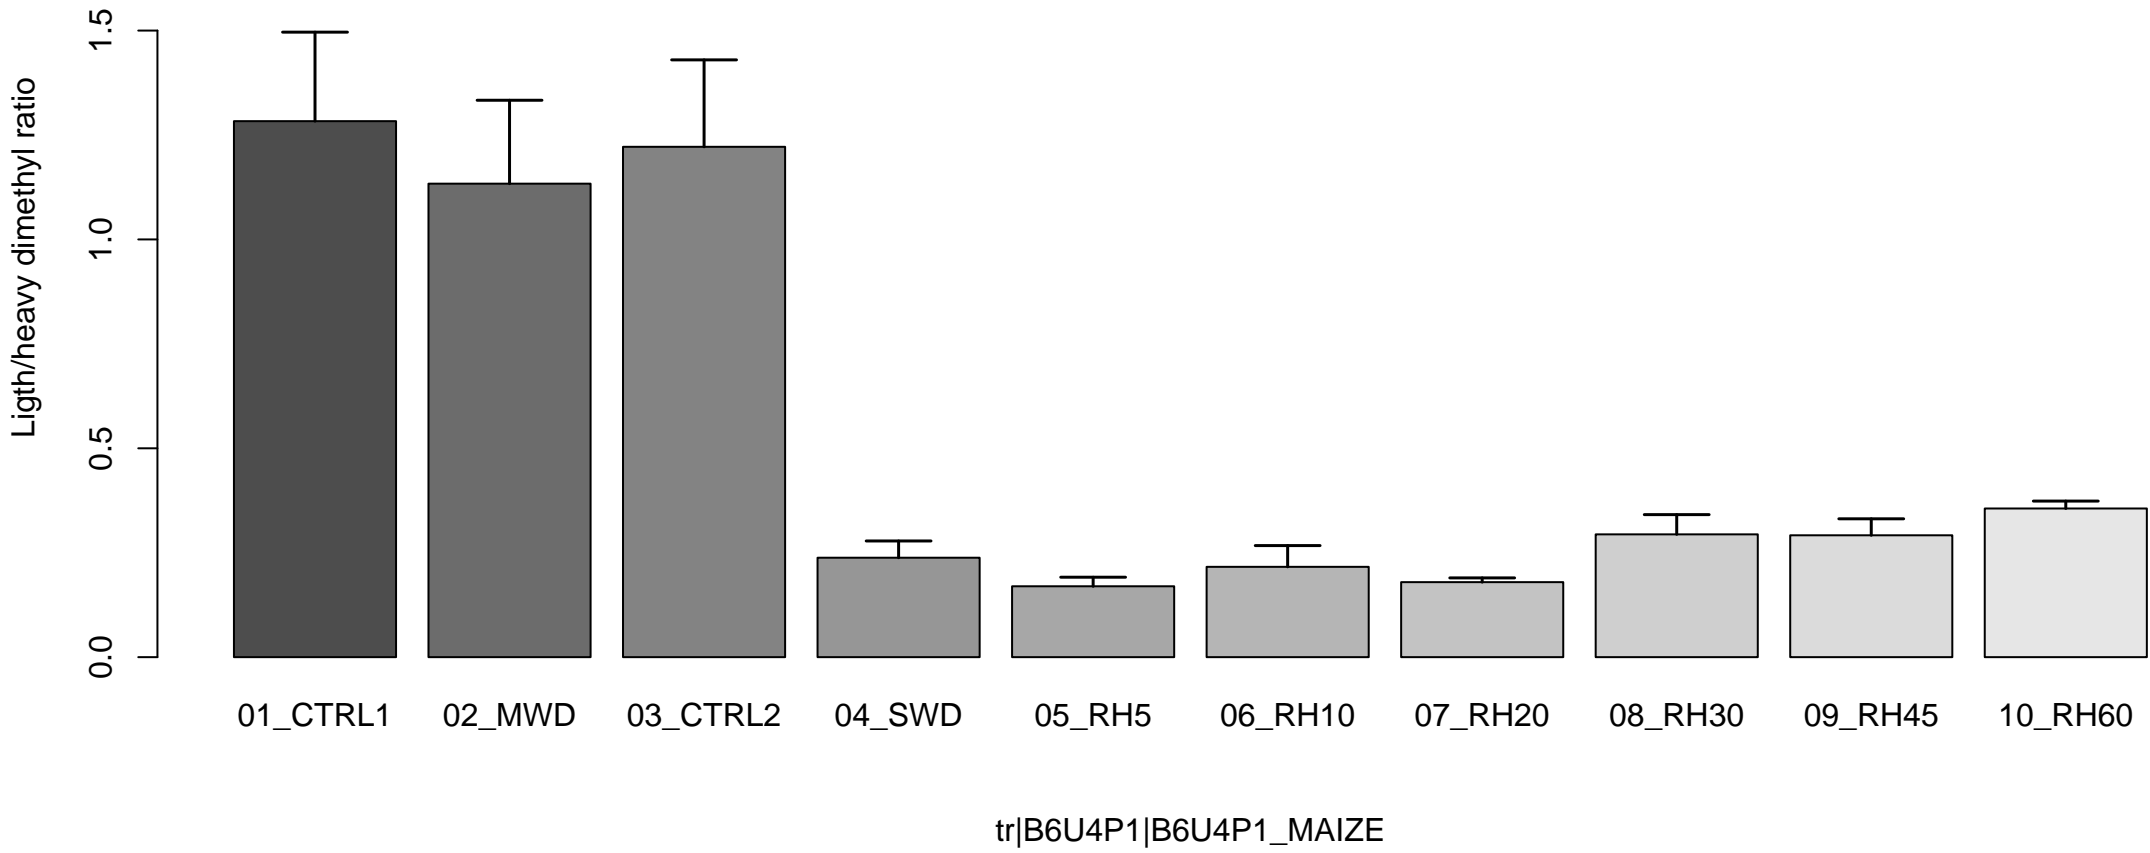

### Putative uncharacterized protein # S58, S62

Ligth/heavy dimethyl ratio

1.5  
1.0  
0.5  
0.0

01\_CTRL1

02\_MWD

03\_CTRL2

04\_SWD

05\_RH5

06\_RH10

07\_RH20

08\_RH30

09\_RH45

10\_RH60

tr|B6U4P1|B6U4P1\_MAIZE

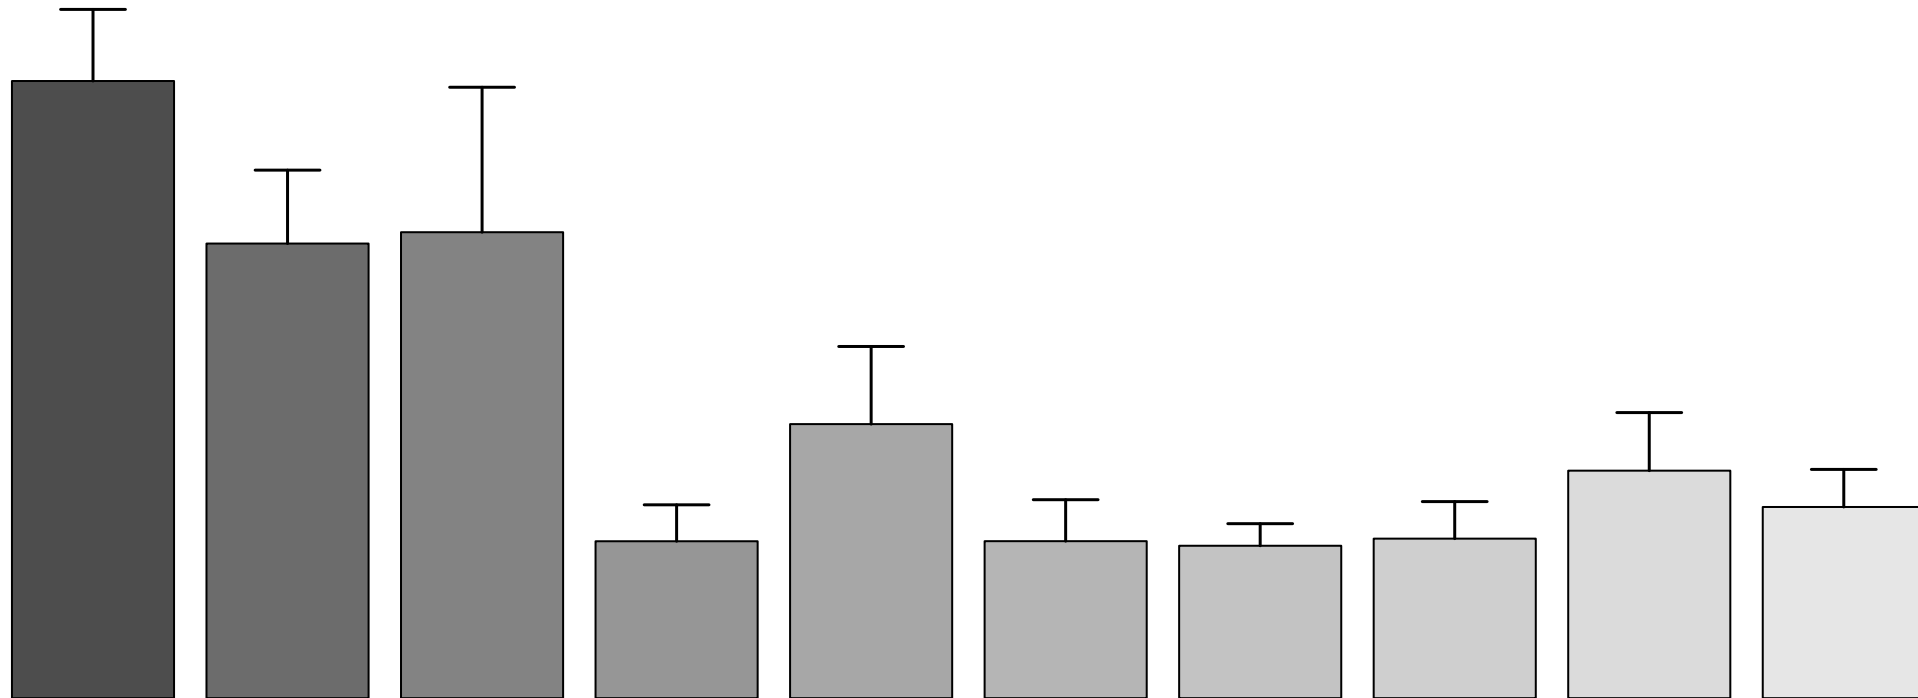

Supplement: supp_M111.015867_mcp.M111.015867-6.pdf [file supp_M111.015867_mcp.M111.015867-6.pdf]
