# Supplementary material
Source: PubMed Central journal article supplement (PMC3494150)
Supplement: supp_M111.015867_mcp.M111.015867-2.pdf [file supp_M111.015867_mcp.M111.015867-2.pdf]

## Supplemental Information

### Phosphoproteome dynamics upon changes in plant water status reveal early events associated with rapid growth adjustment in maize leaves

Ludovic Bonhomme, Benoît Valot, François Tardieu and Michel Zivy

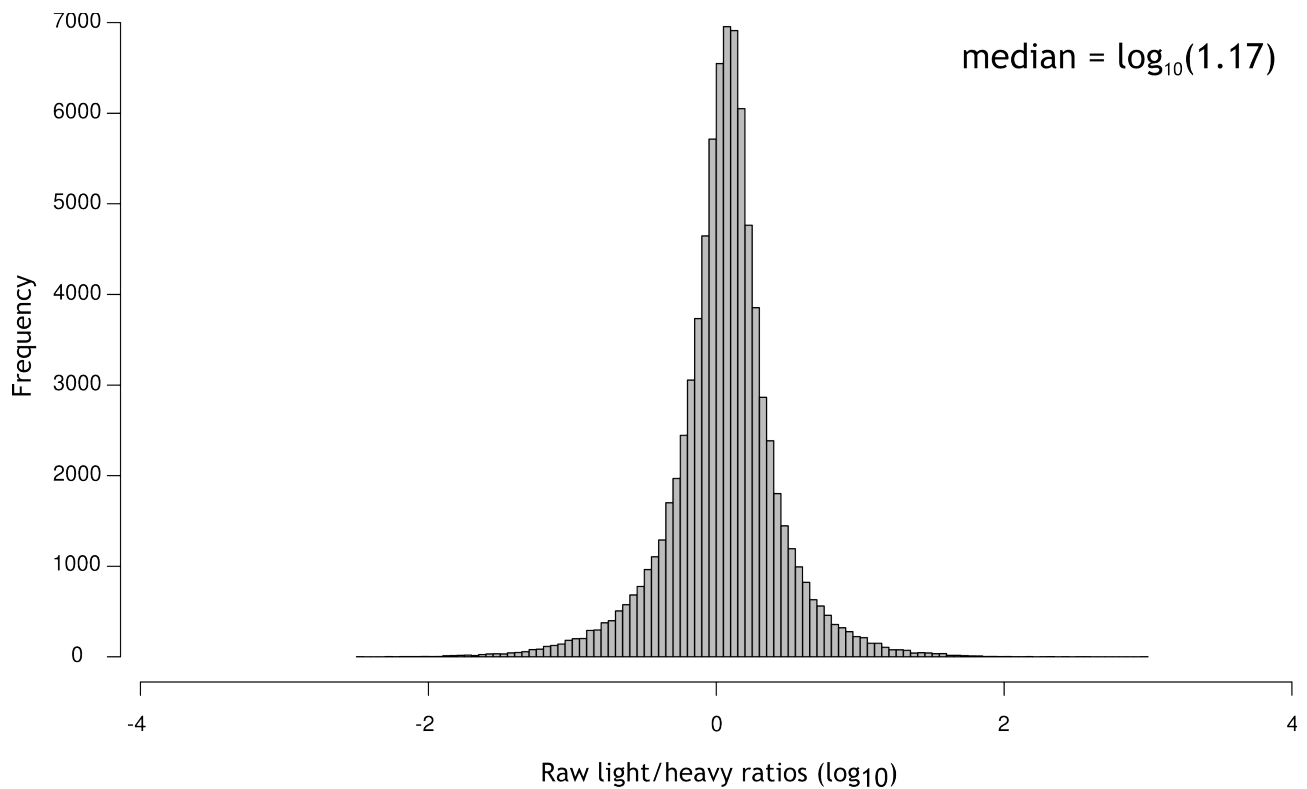

**Supplemental Fig. S2. Distribution of the quantified raw ratios.** Quantified phosphorylation sites were binned according to their log<sub>10</sub> values of the raw biological replicates *versus* internal standard ratios (light- *versus* heavy-dimethyl labeled ratios). Raw ratios are shown for phosphorylation sites deemed reproducible (ratios that were quantified in at least 2/3 of all biological replicates). Before any normalization, the median value of the whole set of raw ratios was of 1.17.
