# Supplementary material
Source: PubMed Central journal article supplement (PMC3494150)
Supplement: supp_M111.015867_mcp.M111.015867-3.pdf [file supp_M111.015867_mcp.M111.015867-3.pdf]

**Supplemental Information**

**Phosphoproteome dynamics upon changes in plant water status reveal early events  
associated with rapid growth adjustment in maize leaves**

Ludovic Bonhomme, Benoît Valot, François Tardieu and Michel Zivy

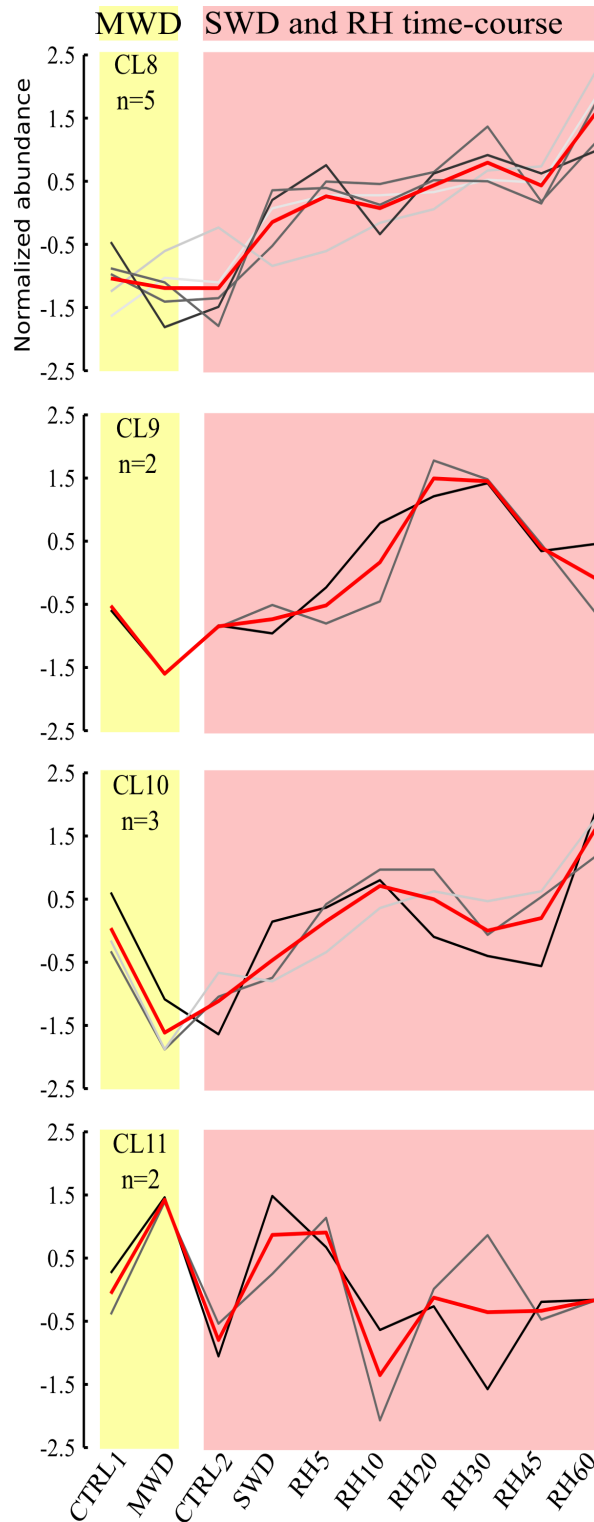

**Supplemental Fig. S3. Supplemental SOTA clusters.** SOTA clustering of phosphorylation sites significantly changed by plant water status. The four supplemental clusters of Fig. 5 are shown. Individual profiles are depicted by gray lines (Z score), whereas the average profile is marked in red (for detailed view of individual profiles, see Supplemental Fig. S6). The cluster identification and the number of profiles included in each cluster are indicated in the left upper corner.
