# Supplementary material
Source: PubMed Central journal article supplement (PMC3494150)
Supplement: supp_M111.015867_mcp.M111.015867-4.pdf [file supp_M111.015867_mcp.M111.015867-4.pdf]

**Supplemental Information**

**Phosphoproteome dynamics upon changes in plant water status reveal early events  
associated with rapid growth adjustment in maize leaves**

Ludovic Bonhomme, Benoît Valot, François Tardieu and Michel Zivy

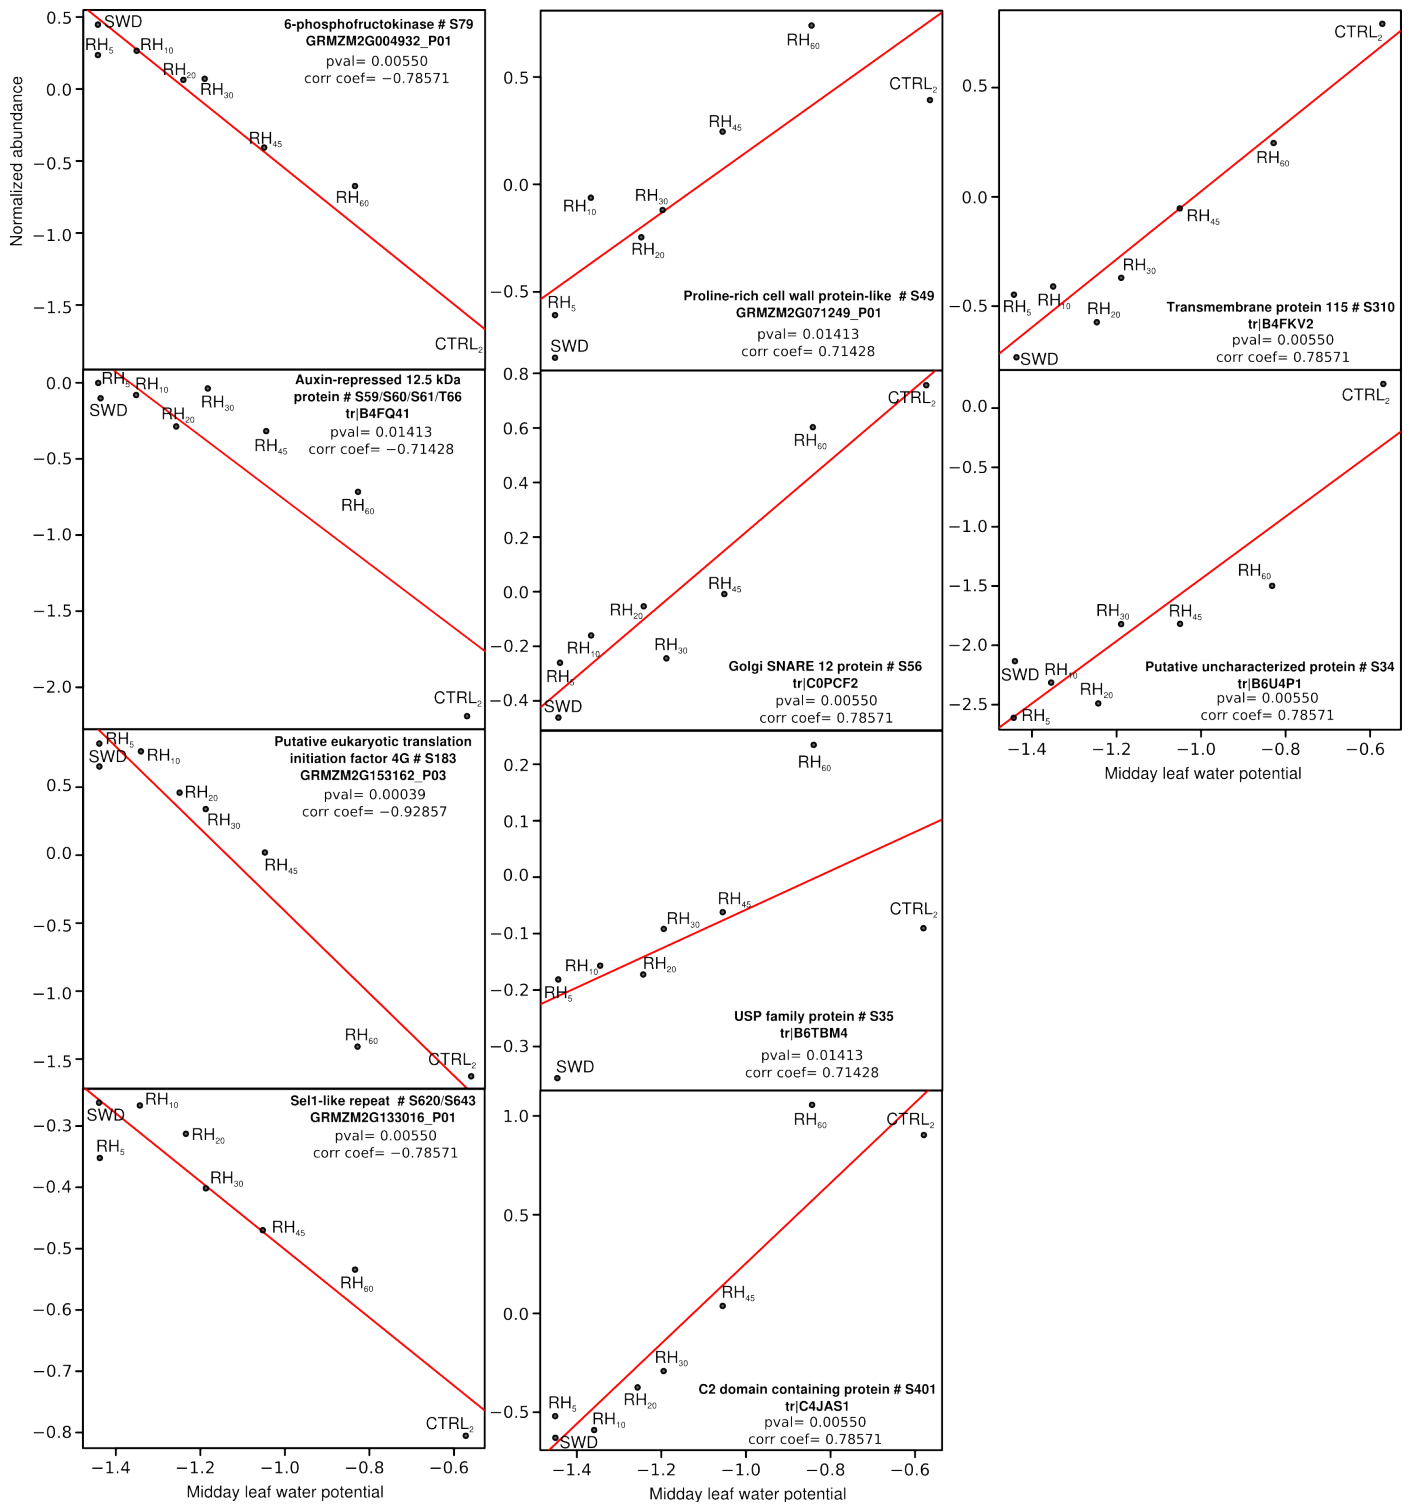

**Supplemental Fig. S4. Correlation between phosphorylation site abundances and midday leaf water potential.** The relationship between protein phosphorylation and midday leaf water potential was evaluated by rank correlations (Kendall's tau coefficient,  $\tau$ ) performed by computing the average values observed in CTRL<sub>2</sub>, SWD and RH<sub>5</sub> to RH<sub>60</sub>.
