# Supplementary material
Source: PubMed Central journal article supplement (PMC3494150)
Supplement: supp_M111.015867_mcp.M111.015867-5.pdf [file supp_M111.015867_mcp.M111.015867-5.pdf]

Supplemental Information

**Phosphoproteome dynamics upon changes in plant water status reveal early events associated with rapid growth adjustment in maize leaves**

Ludovic Bonhomme, Benoît Valot, François Tardieu and Michel Zivy

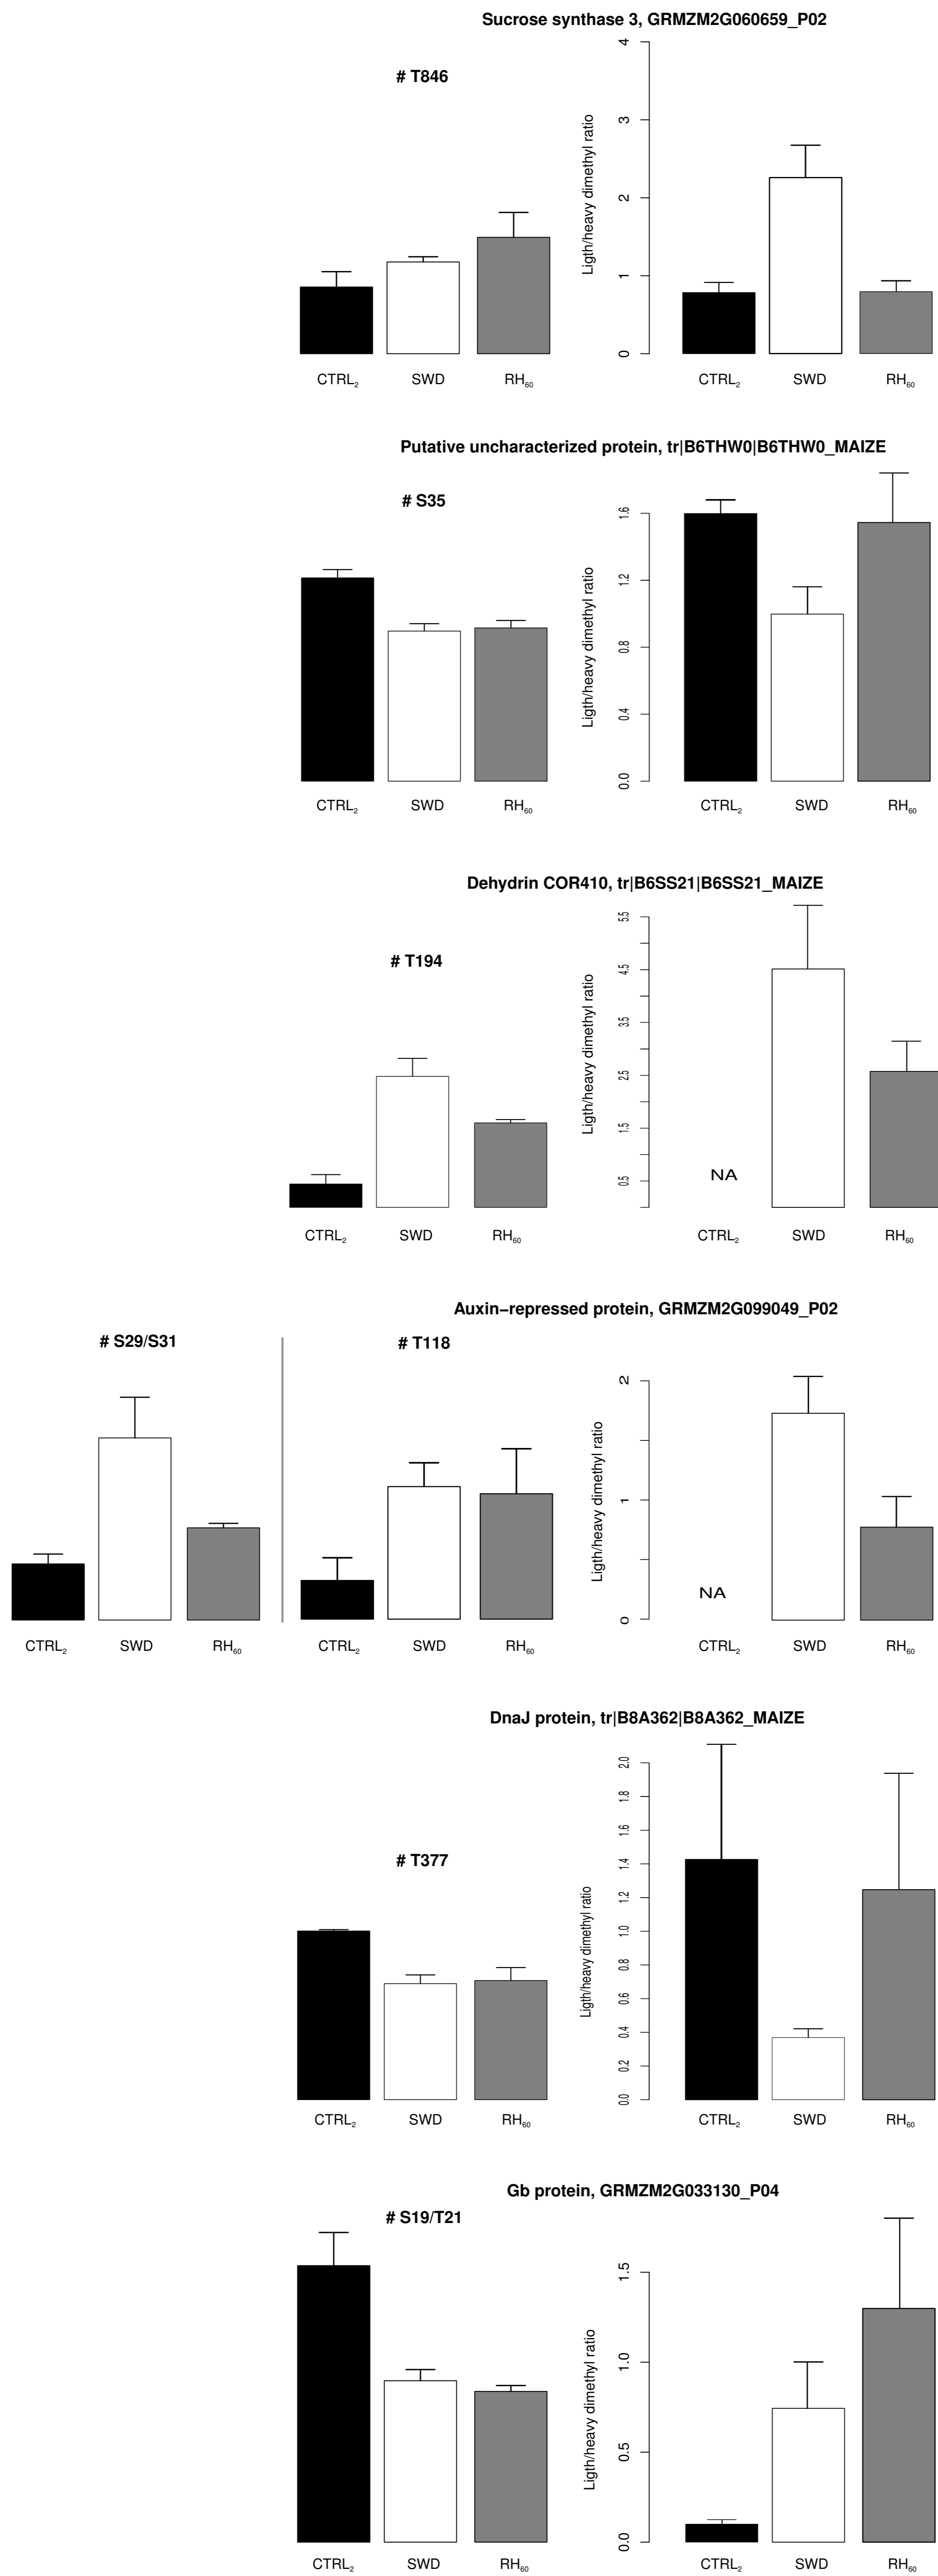

**Supplemental Fig. S5.** Relative abundances of phosphopeptides and non-phosphopeptides shown for the 6 proteins displaying significant changes in abundance upon SWD. Phosphopeptide abundances are depicted on the left while non-phosphopeptide abundances are given on the right. Bars show mean values  $\pm$  SEM computed for each treatment. RH<sub>60</sub>-induced change was significant for the sucrose synthase 3 only.
